# Supplementary material for: Structural and functional properties of a plant NRAMP-related aluminum transporter
Source: eLife journal article supplement (doi:10.7554/elife.85641), 2023-04-05
Supplement: fig1-figsupp2-data1 [file Figure1-supplement2.xlsx]

## Sheet: Fig1-suppl2A
SiNRAT1 in DDM		ml	mAu
		0	0.228
		0.0249934	0.243
		0.0499869	0.248
		0.0749803	0.226
		0.0999737	0.182
		0.124967	0.13
		0.149961	0.673
		0.174954	0.613
		0.199947	0.476
		0.224941	0.358
		0.249934	0.282
		0.274928	0.197
		0.299921	0.17
		0.324915	0.127
		0.349908	0.112
		0.374901	0.072
		0.399895	0.068
		0.424888	0.027
		0.449882	0.01
		0.474875	0.018
		0.499869	0.002
		0.524862	-0.028
		0.549855	-0.005
		0.574849	-0.031
		0.599842	-0.027
		0.624836	-0.048
		0.649829	-0.054
		0.674823	-0.051
		0.699816	-0.049
		0.724809	-0.069
		0.749803	-0.087
		0.774796	-0.069
		0.79979	-0.08
		0.824783	-0.082
		0.849777	-0.09
		0.87477	-0.084
		0.899763	-0.099
		0.924757	-0.09
		0.94975	-0.105
		0.974744	-0.107
		0.999737	-0.093
		1.02473	-0.103
		1.04972	-0.106
		1.07472	-0.091
		1.09971	-0.111
		1.1247	-0.112
		1.1497	-0.1
		1.17469	-0.122
		1.19968	-0.112
		1.22468	-0.112
		1.24967	-0.099
		1.27466	-0.13
		1.29966	-0.138
		1.32465	-0.134
		1.34965	-0.127
		1.37464	-0.126
		1.39963	-0.12
		1.42463	-0.122
		1.44962	-0.121
		1.47461	-0.119
		1.49961	-0.113
		1.5246	-0.131
		1.54959	-0.12
		1.57459	-0.125
		1.59958	-0.143
		1.62457	-0.14
		1.64957	-0.139
		1.67456	-0.141
		1.69955	-0.15
		1.72455	-0.138
		1.74954	-0.131
		1.77453	-0.136
		1.79953	-0.135
		1.82452	-0.135
		1.84951	-0.122
		1.87451	-0.126
		1.8995	-0.132
		1.92449	-0.131
		1.94949	-0.136
		1.97448	-0.13
		1.99947	-0.146
		2.02447	-0.161
		2.04946	-0.143
		2.07445	-0.146
		2.09945	-0.139
		2.12444	-0.14
		2.14943	-0.144
		2.17443	-0.145
		2.19942	-0.166
		2.22442	-0.136
		2.24941	-0.153
		2.2744	-0.153
		2.2994	-0.164
		2.32439	-0.156
		2.34938	-0.149
		2.37438	-0.137
		2.39937	-0.144
		2.42436	-0.153
		2.44936	-0.142
		2.47435	-0.135
		2.49934	-0.136
		2.52434	-0.137
		2.54933	-0.14
		2.57432	-0.148
		2.59932	-0.148
		2.62431	-0.159
		2.6493	-0.137
		2.6743	-0.136
		2.69929	-0.134
		2.72428	-0.151
		2.74928	-0.148
		2.77427	-0.146
		2.79926	-0.125
		2.82426	-0.145
		2.84925	-0.165
		2.87424	-0.16
		2.89924	-0.134
		2.92423	-0.14
		2.94922	-0.168
		2.97422	-0.15
		2.99921	-0.157
		3.0242	-0.163
		3.0492	-0.16
		3.07419	-0.157
		3.09919	-0.158
		3.12418	-0.16
		3.14917	-0.147
		3.17417	-0.166
		3.19916	-0.148
		3.22415	-0.159
		3.24915	-0.153
		3.27414	-0.147
		3.29913	-0.163
		3.32413	-0.159
		3.34912	-0.162
		3.37411	-0.165
		3.39911	-0.177
		3.4241	-0.169
		3.44909	-0.162
		3.47409	-0.16
		3.49908	-0.176
		3.52407	-0.149
		3.54907	-0.145
		3.57406	-0.142
		3.59905	-0.166
		3.62405	-0.162
		3.64904	-0.151
		3.67403	-0.164
		3.69903	-0.155
		3.72402	-0.153
		3.74901	-0.164
		3.77401	-0.154
		3.799	-0.154
		3.82399	-0.168
		3.84899	-0.154
		3.87398	-0.157
		3.89898	-0.142
		3.92397	-0.159
		3.94896	-0.171
		3.97396	-0.156
		3.99895	-0.166
		4.02394	-0.167
		4.04894	-0.162
		4.07393	-0.167
		4.09892	-0.15
		4.12392	-0.154
		4.14891	-0.15
		4.1739	-0.174
		4.1989	-0.163
		4.22389	-0.171
		4.24888	-0.183
		4.27388	-0.184
		4.29887	-0.17
		4.32386	-0.178
		4.34886	-0.176
		4.37385	-0.162
		4.39884	-0.161
		4.42384	-0.153
		4.44883	-0.164
		4.47382	-0.16
		4.49882	-0.156
		4.52381	-0.167
		4.5488	-0.158
		4.5738	-0.149
		4.59879	-0.158
		4.62378	-0.154
		4.64878	-0.169
		4.67377	-0.152
		4.69876	-0.176
		4.72376	-0.152
		4.74875	-0.173
		4.77375	-0.153
		4.79874	-0.165
		4.82373	-0.168
		4.84873	-0.168
		4.87372	-0.168
		4.89871	-0.177
		4.92371	-0.185
		4.9487	-0.179
		4.97369	-0.168
		4.99869	-0.163
		5.02368	-0.183
		5.04867	-0.171
		5.07367	-0.156
		5.09866	-0.165
		5.12365	-0.164
		5.14865	-0.166
		5.17364	-0.17
		5.19863	-0.17
		5.22363	-0.167
		5.24862	-0.175
		5.27361	-0.173
		5.29861	-0.155
		5.3236	-0.164
		5.34859	-0.158
		5.37359	-0.167
		5.39858	-0.173
		5.42357	-0.17
		5.44857	-0.166
		5.47356	-0.154
		5.49855	-0.167
		5.52355	-0.175
		5.54854	-0.175
		5.57353	-0.178
		5.59853	-0.174
		5.62352	-0.172
		5.64852	-0.162
		5.67351	-0.175
		5.6985	-0.15
		5.7235	-0.17
		5.74849	-0.155
		5.77348	-0.183
		5.79848	-0.176
		5.82347	-0.182
		5.84846	-0.181
		5.87346	-0.169
		5.89845	-0.174
		5.92344	-0.179
		5.94844	-0.168
		5.97343	-0.173
		5.99842	-0.16
		6.02342	-0.165
		6.04841	-0.169
		6.0734	-0.161
		6.0984	-0.182
		6.12339	-0.167
		6.14838	-0.174
		6.17338	-0.182
		6.19837	-0.162
		6.22336	-0.192
		6.24836	-0.187
		6.27335	-0.194
		6.29834	-0.188
		6.32334	-0.177
		6.34833	-0.178
		6.37332	-0.167
		6.39832	-0.181
		6.42331	-0.181
		6.4483	-0.18
		6.4733	-0.178
		6.49829	-0.163
		6.52329	-0.187
		6.54828	-0.172
		6.57327	-0.16
		6.59827	-0.179
		6.62326	-0.186
		6.64825	-0.176
		6.67325	-0.176
		6.69824	-0.178
		6.72323	-0.182
		6.74823	-0.184
		6.77322	-0.195
		6.79821	-0.16
		6.82321	-0.165
		6.8482	-0.181
		6.87319	-0.174
		6.89819	-0.184
		6.92318	-0.204
		6.94817	-0.177
		6.97317	-0.186
		6.99816	-0.191
		7.02315	-0.194
		7.04815	-0.178
		7.07314	-0.144
		7.09813	-0.13
		7.12313	-0.127
		7.14812	-0.164
		7.17311	-0.159
		7.19811	-0.148
		7.2231	-0.175
		7.24809	-0.169
		7.27309	-0.164
		7.29808	-0.163
		7.32307	-0.145
		7.34807	-0.142
		7.37306	-0.155
		7.39806	-0.135
		7.42305	-0.13
		7.44804	-0.12
		7.47304	-0.086
		7.49803	-0.054
		7.52302	-0.006
		7.54802	0.033
		7.57301	0.09
		7.598	0.154
		7.623	0.227
		7.64799	0.314
		7.67298	0.422
		7.69798	0.532
		7.72297	0.665
		7.74796	0.821
		7.77296	0.99
		7.79795	1.191
		7.82294	1.417
		7.84794	1.664
		7.87293	1.933
		7.89792	2.247
		7.92292	2.611
		7.94791	3.001
		7.9729	3.434
		7.9979	3.943
		8.02289	4.53
		8.04788	5.23
		8.07288	6.108
		8.09787	7.172
		8.12286	8.553
		8.14786	10.316
		8.17285	12.598
		8.19784	15.379
		8.22284	18.818
		8.24783	22.517
		8.27283	26.913
		8.29782	31.21
		8.32281	35.921
		8.34781	40.304
		8.3728	45.011
		8.39779	49.046
		8.42279	53.226
		8.44778	56.458
		8.47277	59.946
		8.49777	62.68
		8.52276	65.326
		8.54775	67.05
		8.57275	68.607
		8.59774	69.379
		8.62273	69.669
		8.64773	69.286
		8.67272	68.352
		8.69771	66.667
		8.72271	64.772
		8.7477	62.523
		8.77269	60.161
		8.79769	57.673
		8.82268	55.47
		8.84767	53.28
		8.87267	51.381
		8.89766	49.582
		8.92265	48.078
		8.94765	46.718
		8.97264	45.58
		8.99763	44.604
		9.02263	43.812
		9.04762	43.18
		9.07261	42.705
		9.09761	42.325
		9.1226	42.044
		9.1476	41.91
		9.17259	41.836
		9.19758	41.852
		9.22258	41.922
		9.24757	42.019
		9.27256	42.145
		9.29756	42.332
		9.32255	42.484
		9.34754	42.717
		9.37254	42.909
		9.39753	43.146
		9.42252	43.35
		9.44752	43.627
		9.47251	43.855
		9.4975	44.129
		9.5225	44.367
		9.54749	44.6
		9.57248	44.822
		9.59748	45.105
		9.62247	45.318
		9.64746	45.569
		9.67246	45.752
		9.69745	46.007
		9.72244	46.194
		9.74744	46.458
		9.77243	46.658
		9.79742	46.897
		9.82242	47.1
		9.84741	47.335
		9.8724	47.502
		9.8974	47.749
		9.92239	47.916
		9.94739	48.137
		9.97238	48.315
		9.99737	48.539
		10.0224	48.688
		10.0474	48.945
		10.0724	49.119
		10.0973	49.335
		10.1223	49.526
		10.1473	49.721
		10.1723	49.885
		10.1973	50.09
		10.2223	50.213
		10.2473	50.42
		10.2723	50.548
		10.2973	50.682
		10.3223	50.822
		10.3473	50.97
		10.3723	51.094
		10.3973	51.243
		10.4223	51.339
		10.4473	51.389
		10.4722	51.471
		10.4972	51.495
		10.5222	51.52
		10.5472	51.515
		10.5722	51.497
		10.5972	51.443
		10.6222	51.412
		10.6472	51.316
		10.6722	51.229
		10.6972	51.107
		10.7222	50.962
		10.7472	50.772
		10.7722	50.594
		10.7972	50.346
		10.8222	50.125
		10.8471	49.82
		10.8721	49.547
		10.8971	49.216
		10.9221	48.955
		10.9471	48.582
		10.9721	48.279
		10.9971	47.919
		11.0221	47.57
		11.0471	47.179
		11.0721	46.821
		11.0971	46.388
		11.1221	46.018
		11.1471	45.612
		11.1721	45.226
		11.1971	44.809
		11.222	44.512
		11.247	44.147
		11.272	43.81
		11.297	43.481
		11.322	43.197
		11.347	42.906
		11.372	42.654
		11.397	42.391
		11.422	42.188
		11.447	41.982
		11.472	41.803
		11.497	41.675
		11.522	41.583
		11.547	41.509
		11.572	41.491
		11.597	41.511
		11.6219	41.561
		11.6469	41.689
		11.6719	41.854
		11.6969	42.116
		11.7219	42.445
		11.7469	42.927
		11.7719	43.433
		11.7969	44.177
		11.8219	44.986
		11.8469	46.074
		11.8719	47.225
		11.8969	48.735
		11.9219	50.379
		11.9469	52.457
		11.9719	54.681
		11.9968	57.462
		12.0218	60.41
		12.0468	64.061
		12.0718	67.746
		12.0968	72.205
		12.1218	76.764
		12.1468	82.028
		12.1718	87.332
		12.1968	93.567
		12.2218	99.527
		12.2468	106.525
		12.2718	113.155
		12.2968	120.777
		12.3218	127.758
		12.3468	135.941
		12.3717	142.756
		12.3967	150.797
		12.4217	157.486
		12.4467	164.983
		12.4717	171.1
		12.4967	177.93
		12.5217	183.303
		12.5467	188.883
		12.5717	193.099
		12.5967	197.185
		12.6217	200.091
		12.6467	202.566
		12.6717	203.901
		12.6967	204.696
		12.7217	204.548
		12.7466	203.771
		12.7716	202.28
		12.7966	200.049
		12.8216	197.408
		12.8466	193.826
		12.8716	190.084
		12.8966	185.54
		12.9216	181.016
		12.9466	175.69
		12.9716	170.826
		12.9966	164.802
		13.0216	159.673
		13.0466	153.652
		13.0716	148.257
		13.0966	142.113
		13.1216	136.67
		13.1465	130.455
		13.1715	124.861
		13.1965	118.906
		13.2215	113.352
		13.2465	107.729
		13.2715	102.642
		13.2965	97.286
		13.3215	92.584
		13.3465	87.78
		13.3715	83.376
		13.3965	78.985
		13.4215	75.036
		13.4465	71.059
		13.4715	67.476
		13.4965	63.943
		13.5214	60.705
		13.5464	57.66
		13.5714	54.986
		13.5964	52.27
		13.6214	49.98
		13.6464	47.66
		13.6714	45.682
		13.6964	43.66
		13.7214	41.898
		13.7464	40.164
		13.7714	38.654
		13.7964	37.167
		13.8214	35.777
		13.8464	34.562
		13.8714	33.406
		13.8963	32.323
		13.9213	31.344
		13.9463	30.396
		13.9713	29.516
		13.9963	28.718
		14.0213	27.959
		14.0463	27.245
		14.0713	26.577
		14.0963	25.914
		14.1213	25.349
		14.1463	24.817
		14.1713	24.358
		14.1963	23.928
		14.2213	23.553
		14.2463	23.227
		14.2712	22.995
		14.2962	22.844
		14.3212	22.746
		14.3462	22.796
		14.3712	22.927
		14.3962	23.228
		14.4212	23.592
		14.4462	24.221
		14.4712	24.933
		14.4962	25.805
		14.5212	26.77
		14.5462	27.983
		14.5712	29.231
		14.5962	30.746
		14.6212	32.284
		14.6461	34.04
		14.6711	35.794
		14.6961	37.802
		14.7211	39.655
		14.7461	41.816
		14.7711	43.716
		14.7961	45.892
		14.8211	47.83
		14.8461	49.966
		14.8711	51.828
		14.8961	53.927
		14.9211	55.654
		14.9461	57.623
		14.9711	59.221
		14.9961	61.002
		15.0211	62.393
		15.046	63.938
		15.071	65.159
		15.096	66.428
		15.121	67.437
		15.146	68.462
		15.171	69.212
		15.196	69.958
		15.221	70.487
		15.246	70.938
		15.271	71.184
		15.296	71.351
		15.321	71.335
		15.346	71.182
		15.371	70.891
		15.396	70.454
		15.4209	69.895
		15.4459	69.146
		15.4709	68.327
		15.4959	67.222
		15.5209	66.149
		15.5459	64.768
		15.5709	63.442
		15.5959	61.771
		15.6209	60.339
		15.6459	58.464
		15.6709	56.821
		15.6959	54.883
		15.7209	53.069
		15.7459	51.085
		15.7709	49.222
		15.7958	47.169
		15.8208	45.236
		15.8458	43.198
		15.8708	41.232
		15.8958	39.296
		15.9208	37.488
		15.9458	35.559
		15.9708	33.881
		15.9958	32.065
		16.0208	30.448
		16.0458	28.818
		16.0708	27.339
		16.0958	25.787
		16.1208	24.431
		16.1458	23.027
		16.1707	21.743
		16.1957	20.525
		16.2207	19.416
		16.2457	18.284
		16.2707	17.33
		16.2957	16.317
		16.3207	15.419
		16.3457	14.554
		16.3707	13.791
		16.3957	12.99
		16.4207	12.292
		16.4457	11.632
		16.4707	10.982
		16.4957	10.44
		16.5207	9.892
		16.5457	9.409
		16.5706	8.954
		16.5956	8.497
		16.6206	8.114
		16.6456	7.753
		16.6706	7.403
		16.6956	7.063
		16.7206	6.777
		16.7456	6.497
		16.7706	6.236
		16.7956	6.019
		16.8206	5.807
		16.8456	5.608
		16.8706	5.439
		16.8956	5.264
		16.9206	5.105
		16.9455	4.973
		16.9705	4.856
		16.9955	4.723
		17.0205	4.628
		17.0455	4.502
		17.0705	4.418
		17.0955	4.318
		17.1205	4.214
		17.1455	4.128
		17.1705	4.055
		17.1955	3.95
		17.2205	3.879
		17.2455	3.791
		17.2705	3.72
		17.2955	3.618
		17.3204	3.533
		17.3454	3.445
		17.3704	3.365
		17.3954	3.277
		17.4204	3.201
		17.4454	3.099
		17.4704	3.036
		17.4954	2.922
		17.5204	2.85
		17.5454	2.751
		17.5704	2.667
		17.5954	2.577
		17.6204	2.486
		17.6454	2.403
		17.6704	2.33
		17.6953	2.24
		17.7203	2.167
		17.7453	2.098
		17.7703	2.032
		17.7953	1.951
		17.8203	1.894
		17.8453	1.819
		17.8703	1.746
		17.8953	1.697
		17.9203	1.639
		17.9453	1.593
		17.9703	1.536
		17.9953	1.486
		18.0203	1.453
		18.0453	1.398
		18.0702	1.353
		18.0952	1.305
		18.1202	1.26
		18.1452	1.226
		18.1702	1.201
		18.1952	1.169
		18.2202	1.124
		18.2452	1.091
		18.2702	1.056
		18.2952	1.048
		18.3202	1.001
		18.3452	0.985
		18.3702	0.957
		18.3952	0.923
		18.4202	0.927
		18.4452	0.885
		18.4701	0.863
		18.4951	0.835
		18.5201	0.789
		18.5451	0.799
		18.5701	0.769
		18.5951	0.76
		18.6201	0.743
		18.6451	0.72
		18.6701	0.719
		18.6951	0.695
		18.7201	0.676
		18.7451	0.665
		18.7701	0.648
		18.7951	0.649
		18.8201	0.633
		18.845	0.622
		18.87	0.613
		18.895	0.618
		18.92	0.585
		18.945	0.607
		18.97	0.596
		18.995	0.614
		19.02	0.637
		19.045	0.624
		19.07	0.616
		19.095	0.657
		19.12	0.693
		19.145	0.729
		19.17	0.763
		19.195	0.789
		19.2199	0.842
		19.2449	0.914
		19.2699	0.96
		19.2949	1.021
		19.3199	1.106
		19.3449	1.154
		19.3699	1.208
		19.3949	1.266
		19.4199	1.315
		19.4449	1.356
		19.4699	1.391
		19.4949	1.43
		19.5199	1.493
		19.5449	1.492
		19.5699	1.512
		19.5948	1.547
		19.6198	1.543
		19.6448	1.573
		19.6698	1.585
		19.6948	1.612
		19.7198	1.623
		19.7448	1.65
		19.7698	1.643
		19.7948	1.652
		19.8198	1.66
		19.8448	1.633
		19.8698	1.638
		19.8948	1.632
		19.9198	1.607
		19.9448	1.586
		19.9698	1.579
		19.9947	1.553
		20.0197	1.52
		20.0447	1.49
		20.0697	1.504
		20.0947	1.467
		20.1197	1.441
		20.1447	1.43
		20.1697	1.424
		20.1947	1.407
		20.2197	1.413
		20.2447	1.402
		20.2697	1.409
		20.2947	1.408
		20.3197	1.43
		20.3447	1.435
		20.3696	1.469
		20.3946	1.448
		20.4196	1.434
		20.4446	1.456
		20.4696	1.439
		20.4946	1.445
		20.5196	1.425
		20.5446	1.415
		20.5696	1.398
		20.5946	1.402
		20.6196	1.401
		20.6446	1.363
		20.6696	1.35
		20.6946	1.352
		20.7196	1.345
		20.7445	1.366
		20.7695	1.356
		20.7945	1.392
		20.8195	1.403
		20.8445	1.423
		20.8695	1.441
		20.8945	1.453
		20.9195	1.462
		20.9445	1.465
		20.9695	1.469
		20.9945	1.468
		21.0195	1.464
		21.0445	1.457
		21.0695	1.452
		21.0945	1.451
		21.1194	1.475
		21.1444	1.473
		21.1694	1.456
		21.1944	1.459
		21.2194	1.457
		21.2444	1.472
		21.2694	1.498
		21.2944	1.495
		21.3194	1.483
		21.3444	1.482
		21.3694	1.497
		21.3944	1.506
		21.4194	1.483
		21.4444	1.481
		21.4694	1.486
		21.4943	1.476
		21.5193	1.465
		21.5443	1.479
		21.5693	1.47
		21.5943	1.458
		21.6193	1.439
		21.6443	1.418
		21.6693	1.418
		21.6943	1.388
		21.7193	1.378
		21.7443	1.368
		21.7693	1.349
		21.7943	1.377
		21.8193	1.37
		21.8443	1.35
		21.8693	1.353
		21.8942	1.376
		21.9192	1.362
		21.9442	1.36
		21.9692	1.346
		21.9942	1.366
		22.0192	1.334
		22.0442	1.34
		22.0692	1.331
		22.0942	1.334
		22.1192	1.328
		22.1442	1.319
		22.1692	1.313
		22.1942	1.304
		22.2192	1.316
		22.2442	1.288
		22.2691	1.285
		22.2941	1.272
		22.3191	1.274
		22.3441	1.272
		22.3691	1.258
		22.3941	1.242
		22.4191	1.249
		22.4441	1.247
		22.4691	1.255
		22.4941	1.25
		22.5191	1.244
		22.5441	1.249
		22.5691	1.249
		22.5941	1.243
		22.6191	1.232
		22.644	1.246
		22.669	1.241
		22.694	1.22
		22.719	1.212
		22.744	1.206
		22.769	1.193
		22.794	1.184
		22.819	1.178
		22.844	1.135
		22.869	1.145
		22.894	1.116
		22.919	1.08
		22.944	1.047
		22.969	1.01
		22.994	0.99
		23.0189	0.942
		23.0439	0.908
		23.0689	0.881
		23.0939	0.838
		23.1189	0.808
		23.1439	0.816
		23.1689	0.763
		23.1939	0.729
		23.2189	0.692
		23.2439	0.689
		23.2689	0.632
		23.2939	0.606
		23.3189	0.592
		23.3439	0.586
		23.3689	0.549
		23.3939	0.524
		23.4188	0.493
		23.4438	0.489
		23.4688	0.449
		23.4938	0.449
		23.5188	0.424
		23.5438	0.409
		23.5688	0.399
		23.5938	0.393
		23.6188	0.361
		23.6438	0.357
		23.6688	0.351
		23.6938	0.335
		23.7188	0.328
		23.7438	0.318
		23.7688	0.297
		23.7937	0.285
		23.8187	0.28
		23.8437	0.287
		23.8687	0.281
		23.8937	0.281
		23.9187	0.247
		23.9437	0.268
		23.9687	0.276
		23.9937	0.264
		24.0187	0.262
		24.0437	0.255
		24.0687	0.279
		24.0937	0.263
		24.1187	0.253
		24.1437	0.256
		24.1686	0.272
		24.1936	0.256
		24.2186	0.246
		24.2436	0.26
		24.2686	0.25
		24.2936	0.25
		24.3186	0.259
		24.3436	0.26

## Sheet: Fig1-suppl2B-rawData
Elution time (min)	4 deg				15 deg				25 deg				35 deg				40 deg				45 deg				50 deg				55 deg				60 deg				70 deg
0	4.56156	4.22662	4.06883		3.97166	3.92612	3.92612		3.87837	3.81883	3.81883		3.75088	3.75088	3.73791		3.71457	3.70795	3.69665		3.74001	3.72264	3.68493		3.64586	3.63097	3.63504		3.69003	3.79624	3.78568		3.78143	3.78813	3.78813		3.86876	3.88145	3.84588
0.00720005	4.56033	4.22572	4.06936		3.97249	3.92539	3.92539		3.87745	3.81842	3.81842		3.75093	3.75093	3.73847		3.71511	3.70777	3.69731		3.74044	3.72272	3.6851		3.64444	3.63178	3.63528		3.68996	3.79579	3.78652		3.78171	3.7883	3.7883		3.86842	3.88234	3.84552
0.0144001	4.55953	4.22469	4.06999		3.97357	3.92472	3.92472		3.87648	3.81801	3.81801		3.75092	3.75092	3.73915		3.71554	3.7076	3.69837		3.74091	3.7226	3.68538		3.6431	3.63268	3.63554		3.68999	3.79541	3.78763		3.78212	3.7886	3.7886		3.86803	3.88309	3.84524
0.0216001	4.55925	4.22354	4.07061		3.97472	3.92419	3.92419		3.87562	3.81761	3.81761		3.75078	3.75078	3.73989		3.71582	3.70752	3.69965		3.74133	3.72226	3.68575		3.64199	3.63361	3.63582		3.69014	3.7952	3.78886		3.78261	3.78907	3.78907		3.86761	3.88367	3.84503
0.0288002	4.55954	4.22232	4.07108		3.97585	3.92382	3.92382		3.87499	3.8172	3.8172		3.75044	3.75044	3.74063		3.7159	3.70757	3.70098		3.74164	3.72174	3.68621		3.64122	3.63451	3.63604		3.69041	3.79521	3.79011		3.78314	3.78976	3.78976		3.86717	3.88405	3.84489
0.0360002	4.56028	4.22111	4.07131		3.97683	3.92358	3.92358		3.87466	3.81677	3.81677		3.74988	3.74988	3.74132		3.71579	3.70777	3.70222		3.74179	3.72111	3.68674		3.64091	3.63533	3.63609		3.69084	3.79543	3.79124		3.78364	3.79065	3.79065		3.86672	3.88417	3.84476
0.0432003	4.56129	4.22001	4.07128		3.97763	3.92342	3.92342		3.87462	3.81634	3.81634		3.74913	3.74913	3.74192		3.7155	3.70807	3.70327		3.74175	3.72042	3.68735		3.64113	3.63606	3.63586		3.69141	3.79583	3.79213		3.78406	3.79166	3.79166		3.86634	3.88404	3.84463
0.0504003	4.56237	4.2191	4.071		3.97824	3.92331	3.92331		3.87481	3.81594	3.81594		3.74832	3.74832	3.7424		3.71507	3.70834	3.70409		3.74148	3.71974	3.68794		3.64187	3.63665	3.63528		3.69204	3.79627	3.79272		3.78436	3.79269	3.79269		3.86608	3.8837	3.84448
0.0576004	4.5633	4.21847	4.07048		3.97867	3.92319	3.92319		3.87511	3.81563	3.81563		3.74758	3.74758	3.74274		3.71456	3.70844	3.70466		3.74101	3.71904	3.68842		3.64302	3.63707	3.63433		3.69268	3.7966	3.79303		3.78456	3.7936	3.7936		3.86598	3.8832	3.84429
0.0648004	4.56395	4.21814	4.06983		3.97892	3.92305	3.92305		3.87543	3.81544	3.81544		3.74703	3.74703	3.74299		3.714	3.70823	3.70498		3.74039	3.71833	3.68869		3.64444	3.63724	3.63305		3.69329	3.79665	3.79311		3.78463	3.79428	3.79428		3.86607	3.88261	3.84408
0.0720005	4.56423	4.21811	4.06913		3.979	3.92289	3.92289		3.87571	3.81541	3.81541		3.74671	3.74671	3.74323		3.71345	3.70766	3.70509		3.73972	3.71758	3.68873		3.64593	3.63709	3.6315		3.69383	3.79635	3.79307		3.7846	3.79465	3.79465		3.86637	3.88198	3.84388
0.0792005	4.56407	4.21832	4.06854		3.97891	3.92269	3.92269		3.87591	3.81552	3.81552		3.74666	3.74666	3.74355		3.71298	3.70674	3.70507		3.73912	3.71675	3.68854		3.64731	3.63662	3.62982		3.69428	3.79572	3.793		3.78445	3.7947	3.7947		3.86689	3.88133	3.84374
0.0864006	4.56349	4.21867	4.0682		3.97865	3.92249	3.92249		3.87605	3.81579	3.81579		3.74686	3.74686	3.74398		3.71267	3.70554	3.70497		3.73869	3.71585	3.68816		3.64845	3.63587	3.62815		3.69459	3.79484	3.79295		3.78423	3.79444	3.79444		3.86763	3.88069	3.84372
0.0936006	4.56256	4.21906	4.06819		3.97823	3.92225	3.92225		3.87616	3.81621	3.81621		3.74725	3.74725	3.7445		3.71255	3.7042	3.70485		3.73849	3.7149	3.68755		3.64929	3.63491	3.62664		3.69472	3.79385	3.79297		3.78401	3.79394	3.79394		3.86853	3.88013	3.84381
0.100801	4.56141	4.21938	4.06848		3.97764	3.92199	3.92199		3.87626	3.81673	3.81673		3.7478	3.7478	3.7451		3.71262	3.70286	3.70477		3.73855	3.71386	3.68668		3.64981	3.63389	3.62547		3.69463	3.79288	3.79307		3.78386	3.79326	3.79326		3.86948	3.87967	3.84397
0.108001	4.56018	4.21958	4.06896		3.97686	3.92165	3.92165		3.87636	3.81729	3.81729		3.74845	3.74845	3.74569		3.7128	3.70169	3.70476		3.73883	3.71278	3.68561		3.65002	3.63289	3.62469		3.69431	3.79207	3.79323		3.78377	3.79249	3.79249		3.87042	3.87933	3.84413
0.115201	4.55905	4.21968	4.06953		3.97592	3.92122	3.92122		3.87651	3.81781	3.81781		3.74912	3.74912	3.74619		3.71301	3.70086	3.70483		3.73927	3.71173	3.68446		3.64997	3.63203	3.62435		3.69378	3.79151	3.7934		3.78373	3.79176	3.79176		3.87127	3.87908	3.84426
0.122401	4.55807	4.21974	4.07004		3.97483	3.92067	3.92067		3.8767	3.81824	3.81824		3.74979	3.74979	3.74648		3.71317	3.70045	3.70499		3.73974	3.71082	3.68335		3.6497	3.63141	3.62443		3.69307	3.79122	3.7935		3.78369	3.79108	3.79108		3.87205	3.87893	3.84433
0.129601	4.55729	4.21979	4.07041		3.97361	3.92001	3.92001		3.87689	3.81854	3.81854		3.75041	3.75041	3.7465		3.71327	3.70044	3.70522		3.74011	3.71013	3.68239		3.64926	3.63111	3.62482		3.69217	3.79118	3.79348		3.78359	3.79041	3.79041		3.87273	3.87889	3.84437
0.136801	4.55668	4.21984	4.07051		3.97232	3.91931	3.91931		3.87706	3.81868	3.81868		3.75097	3.75097	3.74621		3.71328	3.70073	3.70547		3.74026	3.70967	3.68168		3.6487	3.63113	3.6254		3.69108	3.7913	3.79329		3.78338	3.78971	3.78971		3.87331	3.87899	3.84435
0.144001	4.55619	4.21988	4.07031		3.97104	3.91864	3.91864		3.87714	3.8186	3.8186		3.75143	3.75143	3.74564		3.71317	3.7012	3.70564		3.74017	3.70944	3.6813		3.64804	3.63134	3.62601		3.68983	3.79155	3.79292		3.78298	3.78894	3.78894		3.87381	3.87923	3.84425
0.151201	4.55579	4.21993	4.06978		3.96988	3.91808	3.91808		3.87713	3.81823	3.81823		3.75172	3.75172	3.74488		3.71296	3.70169	3.70565		3.73981	3.70942	3.68134		3.64729	3.6316	3.6265		3.68846	3.79184	3.79243		3.7823	3.78816	3.78816		3.87427	3.87964	3.84406
0.158401	4.55543	4.21998	4.06901		3.96891	3.91763	3.91763		3.87706	3.81752	3.81752		3.75179	3.75179	3.74396		3.71269	3.70208	3.70537		3.73923	3.70954	3.68186		3.64648	3.63175	3.62677		3.68708	3.79211	3.79187		3.78133	3.78742	3.78742		3.87473	3.88021	3.8438
0.165601	4.55508	4.21999	4.06812		3.96823	3.91728	3.91728		3.87689	3.81652	3.81652		3.75161	3.75161	3.74292		3.71245	3.70228	3.70478		3.73852	3.70979	3.6828		3.64563	3.63174	3.6268		3.6858	3.79233	3.7913		3.78012	3.78687	3.78687		3.87517	3.88091	3.8435
0.172801	4.55471	4.21987	4.06728		3.96789	3.91701	3.91701		3.87666	3.81531	3.81531		3.75122	3.75122	3.74175		3.7123	3.70224	3.70388		3.7378	3.71011	3.68396		3.64488	3.63154	3.62659		3.68475	3.79246	3.79074		3.77879	3.78659	3.78659		3.87554	3.88174	3.84321
0.180001	4.55433	4.21954	4.06659		3.96793	3.91679	3.91679		3.87637	3.814	3.814		3.75072	3.75072	3.74047		3.71225	3.70199	3.70272		3.73718	3.71051	3.68514		3.64433	3.6312	3.62616		3.68401	3.79254	3.79018		3.77749	3.78668	3.78668		3.87577	3.88262	3.84293
0.187201	4.55397	4.21899	4.06611		3.96832	3.91654	3.91654		3.87604	3.81265	3.81265		3.75023	3.75023	3.73908		3.7123	3.70157	3.70138		3.73675	3.71094	3.68611		3.64406	3.63076	3.62557		3.68366	3.79254	3.78962		3.77632	3.78716	3.78716		3.87578	3.88348	3.84268
0.194401	4.55369	4.21823	4.06587		3.96897	3.91624	3.91624		3.87567	3.81132	3.81132		3.74987	3.74987	3.73763		3.71242	3.70111	3.69998		3.73651	3.71141	3.68674		3.6441	3.63028	3.62489		3.68375	3.79243	3.78908		3.77536	3.78802	3.78802		3.8755	3.88424	3.84246
0.201601	4.55351	4.21736	4.06588		3.96973	3.91591	3.91591		3.87527	3.81007	3.81007		3.74974	3.74974	3.73616		3.71262	3.70075	3.69864		3.73641	3.7119	3.68692		3.64442	3.62988	3.62421		3.68431	3.79221	3.78861		3.77471	3.78911	3.78911		3.8749	3.88485	3.84229
0.208801	4.55343	4.21647	4.06615		3.97045	3.9156	3.9156		3.87481	3.80898	3.80898		3.74991	3.74991	3.73471		3.71295	3.70055	3.6975		3.73639	3.71242	3.68658		3.64497	3.62965	3.62359		3.68528	3.79186	3.78828		3.77441	3.79021	3.79021		3.87398	3.88528	3.84222
0.216001	4.55341	4.21561	4.06658		3.97101	3.91545	3.91545		3.87432	3.80812	3.80812		3.75042	3.75042	3.73343		3.71345	3.7006	3.69671		3.73636	3.71297	3.68572		3.64562	3.62969	3.62312		3.68655	3.79148	3.78811		3.77448	3.79108	3.79108		3.87281	3.88548	3.8422
0.223201	4.5534	4.21485	4.06707		3.97133	3.91558	3.91558		3.87379	3.80748	3.80748		3.75121	3.75121	3.73244		3.7141	3.70087	3.69636		3.73626	3.71355	3.68443		3.64623	3.62995	3.62281		3.68793	3.79114	3.78814		3.7749	3.79152	3.79152		3.87152	3.88547	3.84217
0.230401	4.55335	4.21423	4.06747		3.97137	3.9161	3.9161		3.87326	3.80706	3.80706		3.75215	3.75215	3.73186		3.71488	3.70133	3.69647		3.736	3.71417	3.68285		3.64663	3.63034	3.62272		3.68926	3.79093	3.7884		3.77554	3.79146	3.79146		3.87023	3.88522	3.84204
0.237602	4.5532	4.21378	4.06767		3.97111	3.91697	3.91697		3.87275	3.80682	3.80682		3.75307	3.75307	3.73172		3.71576	3.70194	3.69698		3.73555	3.71481	3.68112		3.64669	3.63075	3.62284		3.69037	3.79096	3.78891		3.77632	3.79096	3.79096		3.86908	3.88478	3.84173
0.244802	4.55292	4.21354	4.06762		3.97055	3.91812	3.91812		3.87228	3.80678	3.80678		3.75382	3.75382	3.73197		3.71668	3.70262	3.69777		3.73499	3.71546	3.67935		3.64635	3.63106	3.62318		3.69115	3.7913	3.78964		3.77716	3.79011	3.79011		3.86814	3.88418	3.84122
0.252002	4.5525	4.21354	4.06731		3.96978	3.91937	3.91937		3.87189	3.80692	3.80692		3.75428	3.75428	3.73248		3.71754	3.70323	3.69873		3.73439	3.71612	3.67764		3.64563	3.63122	3.62367		3.69148	3.792	3.79047		3.77799	3.78912	3.78912		3.86747	3.8835	3.84051
0.259202	4.55198	4.21376	4.06677		3.96888	3.92056	3.92056		3.87167	3.80725	3.80725		3.7544	3.7544	3.73309		3.71816	3.70366	3.69974		3.73385	3.71681	3.67609		3.64462	3.63122	3.62425		3.69134	3.79304	3.79125		3.77873	3.78817	3.78817		3.86706	3.8828	3.83965
0.266402	4.55143	4.21421	4.06606		3.96791	3.92148	3.92148		3.87163	3.80769	3.80769		3.75418	3.75418	3.73366		3.71842	3.7038	3.70068		3.73342	3.71751	3.67478		3.64347	3.63102	3.62483		3.69073	3.79429	3.79183		3.77927	3.78746	3.78746		3.86689	3.8821	3.83871
0.273602	4.55095	4.21484	4.06528		3.96694	3.92203	3.92203		3.87178	3.80816	3.80816		3.75366	3.75366	3.73402		3.71824	3.70364	3.70144		3.73311	3.71816	3.67376		3.64234	3.63069	3.62533		3.68974	3.79556	3.79217		3.77951	3.78709	3.78709		3.86685	3.88148	3.83779
0.280802	4.55058	4.21559	4.06456		3.96605	3.92213	3.92213		3.8721	3.80856	3.80856		3.75292	3.75292	3.73409		3.71759	3.70324	3.7019		3.73296	3.71867	3.67306		3.6414	3.63029	3.6257		3.68851	3.79666	3.7922		3.77939	3.78709	3.78709		3.86681	3.88098	3.837
0.288002	4.55037	4.2164	4.06403		3.96534	3.92178	3.92178		3.87251	3.80881	3.80881		3.75205	3.75205	3.73384		3.71652	3.70262	3.70197		3.73297	3.71901	3.67262		3.64075	3.62997	3.62597		3.68714	3.79744	3.79189		3.77886	3.7874	3.7874		3.86671	3.8806	3.83643
0.295202	4.55029	4.21723	4.06374		3.96491	3.92105	3.92105		3.87293	3.80888	3.80888		3.75119	3.75119	3.7333		3.7151	3.70185	3.70167		3.73314	3.7191	3.6724		3.64042	3.62982	3.62617		3.68577	3.79778	3.79122		3.77792	3.78787	3.78787		3.86658	3.88033	3.83611
0.302402	4.55034	4.21801	4.06368		3.96484	3.92001	3.92001		3.87323	3.80875	3.80875		3.75046	3.75046	3.73254		3.71345	3.70099	3.70104		3.73343	3.71897	3.67234		3.64039	3.62987	3.62639		3.68447	3.79769	3.79022		3.77663	3.78837	3.78837		3.86643	3.88014	3.83601
0.309602	4.55043	4.21866	4.0638		3.96516	3.91878	3.91878		3.87333	3.80847	3.80847		3.74992	3.74992	3.73173		3.71168	3.70013	3.70015		3.73381	3.71864	3.6724		3.64054	3.63012	3.62672		3.68335	3.79719	3.78897		3.77508	3.78878	3.78878		3.86631	3.88	3.83606
0.316802	4.55048	4.21909	4.06399		3.96583	3.91748	3.91748		3.8731	3.80811	3.80811		3.74959	3.74959	3.73098		3.70989	3.69934	3.69906		3.73424	3.71817	3.6725		3.64076	3.63052	3.62718		3.68246	3.79639	3.78757		3.77339	3.78902	3.78902		3.86621	3.87986	3.83618
0.324002	4.55036	4.21927	4.06414		3.96678	3.9162	3.9162		3.87258	3.80774	3.80774		3.74942	3.74942	3.73041		3.70817	3.69868	3.69789		3.73476	3.71764	3.67255		3.64092	3.63103	3.62778		3.68182	3.79546	3.78609		3.7717	3.78904	3.78904		3.86611	3.87968	3.83633
0.331202	4.55	4.2192	4.06414		3.96788	3.91499	3.91499		3.87181	3.8074	3.8074		3.74936	3.74936	3.73002		3.70656	3.69813	3.69676		3.73544	3.71709	3.67253		3.64094	3.63153	3.62844		3.68135	3.79456	3.78461		3.77023	3.78882	3.78882		3.86602	3.87943	3.83648
0.338402	4.54937	4.21894	4.06399		3.96895	3.91389	3.91389		3.87093	3.8071	3.8071		3.74933	3.74933	3.72978		3.70512	3.69769	3.69586		3.73629	3.71658	3.67245		3.64081	3.63188	3.629		3.68098	3.79382	3.78321		3.76914	3.78838	3.78838		3.866	3.87909	3.83668
0.345602	4.54852	4.21854	4.06371		3.96979	3.91291	3.91291		3.87008	3.8068	3.8068		3.74929	3.74929	3.72967		3.70389	3.6974	3.6953		3.73731	3.71614	3.67234		3.64054	3.63201	3.62935		3.6807	3.79328	3.78202		3.7686	3.78774	3.78774		3.86603	3.87869	3.83699
0.352802	4.54754	4.21806	4.06341		3.97027	3.9121	3.9121		3.8694	3.80648	3.80648		3.74914	3.74914	3.72965		3.70291	3.69728	3.69515		3.73846	3.71576	3.67221		3.6402	3.63188	3.62935		3.6805	3.79285	3.78115		3.76864	3.78698	3.78698		3.86609	3.87825	3.83748
0.360002	4.54651	4.21752	4.06319		3.97028	3.91153	3.91153		3.86901	3.80611	3.80611		3.74883	3.74883	3.72971		3.70225	3.69735	3.69537		3.73971	3.71542	3.67208		3.63989	3.63156	3.62896		3.6804	3.79246	3.78066		3.76923	3.78619	3.78619		3.86617	3.87775	3.83818
0.367202	4.54555	4.217	4.06317		3.96987	3.91123	3.91123		3.86899	3.8057	3.8057		3.74836	3.74836	3.72986		3.70193	3.69763	3.69583		3.74103	3.71506	3.67191		3.63967	3.63109	3.62821		3.68035	3.79202	3.78056		3.77026	3.78544	3.78544		3.86626	3.87722	3.83908
0.374402	4.54471	4.21654	4.06336		3.96917	3.91126	3.91126		3.8693	3.80524	3.80524		3.74781	3.74781	3.73008		3.70197	3.6981	3.69639		3.74234	3.71462	3.67172		3.63955	3.63054	3.62719		3.68033	3.79149	3.78079		3.77158	3.78482	3.78482		3.86645	3.87666	3.84011
0.381602	4.54406	4.21621	4.06379		3.96833	3.91161	3.91161		3.8698	3.8048	3.8048		3.74731	3.74731	3.73038		3.70234	3.69875	3.69686		3.74352	3.71411	3.67152		3.63953	3.62999	3.62604		3.68035	3.79084	3.78132		3.77305	3.78438	3.78438		3.8668	3.87611	3.84113
0.388802	4.54361	4.216	4.06435		3.9675	3.91226	3.91226		3.87035	3.80449	3.80449		3.74697	3.74697	3.7308		3.70296	3.69953	3.6971		3.74442	3.71358	3.6713		3.63954	3.6295	3.62497		3.68043	3.7901	3.7821		3.77449	3.78422	3.78422		3.86735	3.87563	3.84197
0.396003	4.54334	4.21587	4.0649		3.96679	3.91316	3.91316		3.8708	3.80441	3.80441		3.74689	3.74689	3.73135		3.70371	3.70036	3.697		3.74492	3.71311	3.67109		3.63952	3.62914	3.62415		3.68062	3.78934	3.78302		3.77578	3.78433	3.78433		3.86808	3.8753	3.84245
0.403203	4.5432	4.21576	4.06524		3.96626	3.91424	3.91424		3.87105	3.80465	3.80465		3.74711	3.74711	3.73197		3.7044	3.70117	3.69657		3.74494	3.7128	3.67091		3.63938	3.6289	3.62372		3.6809	3.78867	3.78399		3.77676	3.78468	3.78468		3.86892	3.87517	3.84246
0.410403	4.54308	4.21559	4.06523		3.96595	3.91544	3.91544		3.8711	3.80524	3.80524		3.7476	3.7476	3.73255		3.70493	3.70185	3.69595		3.74448	3.71269	3.67075		3.6391	3.62874	3.62372		3.68119	3.78821	3.78489		3.7774	3.78513	3.78513		3.86981	3.87529	3.84201
0.417603	4.54289	4.21528	4.06482		3.96584	3.91666	3.91666		3.87091	3.80614	3.80614		3.74833	3.74833	3.73298		3.70516	3.70235	3.69531		3.74359	3.7128	3.67066		3.63868	3.62856	3.62406		3.68143	3.78801	3.78563		3.77774	3.78556	3.78556		3.87066	3.87567	3.84122
0.424803	4.54254	4.21479	4.06404		3.96587	3.91775	3.91775		3.87056	3.80727	3.80727		3.74917	3.74917	3.73316		3.70509	3.70265	3.69484		3.74237	3.71312	3.67064		3.63821	3.62827	3.62462		3.68162	3.78807	3.78621		3.77787	3.78585	3.78585		3.8714	3.87634	3.84024
0.432003	4.54201	4.21411	4.06297		3.96596	3.91858	3.91858		3.87012	3.80855	3.80855		3.74996	3.74996	3.73303		3.70471	3.70274	3.69467		3.74098	3.7136	3.67072		3.63774	3.62788	3.62526		3.6818	3.78829	3.78659		3.77793	3.78593	3.78593		3.87193	3.87725	3.83925
0.439203	4.54133	4.21326	4.06174		3.96606	3.91904	3.91904		3.86969	3.80988	3.80988		3.75056	3.75056	3.73256		3.70409	3.70266	3.69489		3.7396	3.71417	3.67088		3.63737	3.62742	3.62582		3.68203	3.78851	3.78672		3.77802	3.78576	3.78576		3.87218	3.87828	3.83843
0.446403	4.54057	4.21233	4.06049		3.96615	3.91908	3.91908		3.86935	3.81119	3.81119		3.75086	3.75086	3.73176		3.70335	3.70247	3.69548		3.73843	3.71473	3.67113		3.63715	3.6269	3.62614		3.68236	3.78861	3.78658		3.77824	3.78536	3.78536		3.8721	3.87933	3.83791
0.453603	4.53985	4.21143	4.05933		3.96626	3.91874	3.91874		3.86911	3.8124	3.8124		3.75084	3.75084	3.7307		3.70263	3.70221	3.69629		3.73764	3.71519	3.67143		3.63714	3.62636	3.6261		3.68276	3.78852	3.78612		3.77862	3.78479	3.78479		3.8717	3.88027	3.83776
0.460803	4.53924	4.21067	4.05837		3.96639	3.91807	3.91807		3.86891	3.81346	3.81346		3.75056	3.75056	3.72952		3.70207	3.70188	3.69712		3.73729	3.71549	3.67178		3.63732	3.62583	3.62561		3.68323	3.7882	3.78535		3.77916	3.78411	3.78411		3.87102	3.88099	3.83799
0.468003	4.53879	4.21017	4.05766		3.9665	3.91715	3.91715		3.86865	3.81434	3.81434		3.75011	3.75011	3.72834		3.70179	3.70145	3.69774		3.73735	3.7156	3.67213		3.63767	3.62535	3.62467		3.68379	3.78767	3.7843		3.77982	3.78339	3.78339		3.87014	3.88141	3.83851
0.475203	4.53855	4.20994	4.05717		3.96657	3.91607	3.91607		3.86825	3.81502	3.81502		3.7496	3.7496	3.72727		3.70189	3.70089	3.69799		3.73767	3.71553	3.67249		3.63812	3.62496	3.62335		3.68446	3.78694	3.78304		3.78046	3.78269	3.78269		3.86916	3.8815	3.83915
0.482403	4.5385	4.20995	4.05688		3.96655	3.91493	3.91493		3.86766	3.81548	3.81548		3.74915	3.74915	3.72635		3.70234	3.70021	3.69786		3.73811	3.71531	3.6728		3.63857	3.6247	3.62181		3.68524	3.78608	3.78166		3.78096	3.78202	3.78202		3.86817	3.88123	3.83977
0.489603	4.5386	4.21012	4.05674		3.96641	3.91387	3.91387		3.8669	3.81576	3.81576		3.74884	3.74884	3.72561		3.70314	3.69943	3.6974		3.73851	3.71495	3.67302		3.63898	3.62451	3.62017		3.68606	3.78519	3.78027		3.78118	3.7814	3.7814		3.86724	3.88069	3.84027
0.496803	4.53876	4.21034	4.05674		3.96618	3.91302	3.91302		3.86599	3.81584	3.81584		3.74873	3.74873	3.72511		3.70418	3.69859	3.69676		3.73873	3.71448	3.67313		3.63929	3.62437	3.61861		3.68682	3.7844	3.77898		3.78101	3.78083	3.78083		3.86646	3.87992	3.84058
0.504003	4.53884	4.21049	4.05691		3.96589	3.9124	3.9124		3.86494	3.81574	3.81574		3.74879	3.74879	3.72483		3.70538	3.69769	3.69607		3.7387	3.7139	3.67312		3.63948	3.62426	3.61727		3.6875	3.78384	3.77791		3.78044	3.78034	3.78034		3.8659	3.87904	3.84066
0.511203	4.53874	4.21045	4.05725		3.96562	3.91201	3.91201		3.86385	3.81549	3.81549		3.74897	3.74897	3.72477		3.70663	3.69679	3.69542		3.73842	3.71319	3.67301		3.63958	3.62418	3.6163		3.68806	3.78356	3.77715		3.77957	3.78	3.78		3.86564	3.87812	3.84049
0.518403	4.5384	4.21013	4.05775		3.96544	3.91178	3.91178		3.86282	3.81514	3.81514		3.7492	3.7492	3.72489		3.70776	3.69601	3.69493		3.73793	3.7124	3.67283		3.6396	3.62419	3.6158		3.6885	3.78355	3.77674		3.77854	3.77988	3.77988		3.86567	3.87724	3.84008
0.525603	4.53781	4.20957	4.05836		3.96541	3.91163	3.91163		3.86198	3.81474	3.81474		3.74939	3.74939	3.72514		3.70863	3.69548	3.69462		3.73738	3.71156	3.67269		3.63958	3.62431	3.61584		3.68871	3.78375	3.77669		3.77754	3.78005	3.78005		3.86592	3.87647	3.83949
0.532803	4.53704	4.20884	4.05901		3.96555	3.91153	3.91153		3.86143	3.8143	3.8143		3.74945	3.74945	3.72549		3.70913	3.6953	3.69449		3.73685	3.71074	3.67263		3.63951	3.62455	3.61639		3.68866	3.78415	3.77695		3.77672	3.78053	3.78053		3.86633	3.87588	3.83883
0.540003	4.53618	4.20809	4.05966		3.96587	3.91145	3.91145		3.86121	3.81384	3.81384		3.74935	3.74935	3.72591		3.7092	3.69543	3.69448		3.73638	3.71	3.6727		3.63938	3.62486	3.61736		3.68829	3.78468	3.77743		3.77619	3.78124	3.78124		3.86681	3.87548	3.83814
0.547204	4.53531	4.20744	4.06024		3.96631	3.91142	3.91142		3.86134	3.81333	3.81333		3.7491	3.7491	3.72637		3.70885	3.6958	3.69449		3.73598	3.70942	3.67289		3.63916	3.62519	3.6186		3.68764	3.78526	3.77805		3.776	3.78206	3.78206		3.8673	3.87529	3.8375
0.554404	4.5345	4.20698	4.06066		3.96681	3.91141	3.91141		3.86183	3.81278	3.81278		3.74876	3.74876	3.72677		3.70814	3.69629	3.69446		3.73558	3.70902	3.6732		3.63883	3.62548	3.61997		3.68679	3.78576	3.77872		3.77614	3.78287	3.78287		3.8677	3.87529	3.83694
0.561604	4.53382	4.20676	4.06088		3.96723	3.91142	3.91142		3.86263	3.81215	3.81215		3.74839	3.74839	3.72702		3.70717	3.69684	3.69439		3.7351	3.70884	3.67361		3.63835	3.62567	3.62132		3.68584	3.78606	3.77941		3.77651	3.78349	3.78349		3.86788	3.87548	3.83645
0.568804	4.5333	4.20679	4.06086		3.96745	3.91145	3.91145		3.86371	3.81147	3.81147		3.74807	3.74807	3.72707		3.70604	3.69735	3.69432		3.73445	3.70884	3.67403		3.63769	3.62574	3.6225		3.68493	3.7861	3.78004		3.77696	3.78383	3.78383		3.86777	3.87583	3.83605
0.576004	4.53299	4.20702	4.06063		3.96734	3.91154	3.91154		3.86496	3.81074	3.81074		3.74784	3.74784	3.72686		3.70485	3.69776	3.69433		3.73353	3.70893	3.67441		3.63687	3.62565	3.6234		3.68418	3.78591	3.78054		3.77724	3.78379	3.78379		3.86736	3.87633	3.83574
0.583204	4.5329	4.20733	4.06025		3.96686	3.91168	3.91168		3.86625	3.81	3.81		3.74769	3.74769	3.72644		3.70366	3.69798	3.69445		3.73239	3.70906	3.67466		3.63597	3.6254	3.62394		3.68369	3.78559	3.78084		3.77725	3.7834	3.7834		3.86673	3.87692	3.83553
0.590404	4.53302	4.20756	4.05977		3.96599	3.91185	3.91185		3.8675	3.8093	3.8093		3.74759	3.74759	3.72586		3.70255	3.69799	3.69468		3.73113	3.70915	3.67475		3.63511	3.62502	3.62412		3.68354	3.78528	3.78092		3.77696	3.78276	3.78276		3.86595	3.87756	3.83538
0.597604	4.53324	4.20756	4.05922		3.96481	3.91198	3.91198		3.86859	3.80867	3.80867		3.74742	3.74742	3.72516		3.70158	3.69783	3.69499		3.72992	3.70918	3.67469		3.63446	3.62462	3.62396		3.68372	3.78512	3.78082		3.77644	3.78203	3.78203		3.86509	3.87819	3.83531
0.604804	4.53346	4.20725	4.05862		3.96341	3.91201	3.91201		3.86944	3.80815	3.80815		3.74708	3.74708	3.72441		3.70077	3.69764	3.69541		3.72895	3.70915	3.67447		3.63412	3.62434	3.62351		3.68416	3.7852	3.78059		3.7758	3.7814	3.7814		3.86425	3.87874	3.83536
0.612004	4.53363	4.20665	4.05797		3.96194	3.9119	3.9119		3.86999	3.80777	3.80777		3.74646	3.74646	3.72368		3.70015	3.6975	3.69591		3.72838	3.70908	3.6741		3.63416	3.62422	3.62287		3.68478	3.7856	3.78027		3.77512	3.78094	3.78094		3.86354	3.87916	3.83559
0.619204	4.53369	4.20582	4.05731		3.96058	3.91163	3.91163		3.8702	3.80755	3.80755		3.74556	3.74556	3.72305		3.69974	3.69744	3.69647		3.72828	3.70907	3.67358		3.63458	3.62431	3.62212		3.68549	3.78629	3.77989		3.77449	3.78073	3.78073		3.86306	3.87941	3.83607
0.626404	4.53358	4.20486	4.05663		3.95949	3.9112	3.9112		3.87011	3.80746	3.80746		3.74439	3.74439	3.7226		3.69958	3.69743	3.69703		3.72867	3.70919	3.67293		3.63537	3.62459	3.62136		3.68617	3.7872	3.77951		3.77396	3.78073	3.78073		3.8629	3.87946	3.83682
0.633604	4.53328	4.20392	4.05596		3.95887	3.91064	3.91064		3.86982	3.80746	3.80746		3.74305	3.74305	3.72235		3.69975	3.69741	3.6975		3.72946	3.7095	3.6722		3.63641	3.62499	3.62068		3.68675	3.7882	3.77919		3.77356	3.7809	3.7809		3.86307	3.87933	3.83779
0.640804	4.53276	4.20312	4.05532		3.95885	3.90996	3.90996		3.86943	3.8075	3.8075		3.74169	3.74169	3.7223		3.70027	3.69732	3.69784		3.73055	3.70999	3.67144		3.63755	3.62546	3.62013		3.6872	3.78912	3.77904		3.77325	3.78113	3.78113		3.86349	3.87907	3.8389
0.648004	4.53207	4.20254	4.0547		3.95945	3.90928	3.90928		3.86901	3.80755	3.80755		3.74048	3.74048	3.72244		3.7011	3.69716	3.69803		3.73173	3.7106	3.67071		3.63861	3.62595	3.61974		3.68752	3.7898	3.77905		3.77297	3.78134	3.78134		3.8641	3.87874	3.84008
0.655204	4.53134	4.20222	4.05411		3.96056	3.90867	3.90867		3.86868	3.80759	3.80759		3.73961	3.73961	3.72273		3.70221	3.69687	3.69805		3.73284	3.71121	3.67004		3.63947	3.62639	3.61954		3.68771	3.79012	3.77919		3.77265	3.78141	3.78141		3.8648	3.87846	3.84122
0.662404	4.53065	4.2021	4.05357		3.96197	3.90822	3.90822		3.86848	3.8076	3.8076		3.73921	3.73921	3.72323		3.70349	3.69643	3.69787		3.73376	3.71169	3.66944		3.64006	3.62669	3.6196		3.68775	3.79006	3.77936		3.77228	3.78135	3.78135		3.86553	3.87831	3.84221
0.669604	4.53009	4.20209	4.05312		3.96346	3.90798	3.90798		3.86848	3.80756	3.80756		3.73929	3.73929	3.72391		3.70485	3.69584	3.69748		3.73443	3.71196	3.66893		3.64038	3.62676	3.61993		3.68762	3.78967	3.77948		3.77188	3.78117	3.78117		3.86619	3.87837	3.84292
0.676804	4.52967	4.20204	4.05279		3.96481	3.90796	3.90796		3.86865	3.80746	3.80746		3.7397	3.7397	3.72477		3.70618	3.69515	3.69688		3.73485	3.71194	3.6685		3.64042	3.62655	3.62053		3.68727	3.78907	3.77954		3.77155	3.7809	3.7809		3.86668	3.87865	3.84327
0.684004	4.52935	4.20185	4.05266		3.96585	3.90815	3.90815		3.86892	3.8073	3.8073		3.74033	3.74033	3.72577		3.70736	3.69441	3.69613		3.73505	3.71159	3.66814		3.64021	3.62608	3.6213		3.68671	3.78838	3.77954		3.77136	3.78053	3.78053		3.86693	3.87909	3.84323
0.691204	4.52908	4.20145	4.05273		3.96646	3.90851	3.90851		3.86916	3.80713	3.80713		3.74102	3.74102	3.72686		3.7083	3.69367	3.6953		3.7351	3.71092	3.66781		3.63979	3.62543	3.62214		3.68594	3.78771	3.77946		3.77135	3.78009	3.78009		3.86692	3.87961	3.84286
0.698404	4.5288	4.20089	4.05301		3.96656	3.90903	3.90903		3.86928	3.80699	3.80699		3.74166	3.74166	3.72795		3.70893	3.69295	3.69453		3.73499	3.70997	3.66752		3.63925	3.62468	3.62292		3.68501	3.78713	3.77931		3.77154	3.77961	3.77961		3.86668	3.88006	3.84223
0.705605	4.5284	4.20024	4.05349		3.9662	3.9096	3.9096		3.86922	3.80694	3.80694		3.74215	3.74215	3.72894		3.7093	3.69223	3.69385		3.73471	3.70886	3.66726		3.63871	3.62391	3.62357		3.68397	3.78672	3.77911		3.77191	3.77917	3.77917		3.86626	3.8803	3.84136
0.712805	4.52782	4.19965	4.05415		3.96551	3.91018	3.91018		3.86896	3.80703	3.80703		3.74238	3.74238	3.72974		3.70945	3.6915	3.69334		3.73425	3.70768	3.66706		3.63825	3.6232	3.62402		3.68288	3.78653	3.77896		3.77242	3.77883	3.77883		3.86572	3.88029	3.84034
0.720005	4.52707	4.19924	4.05493		3.96468	3.91071	3.91071		3.86848	3.80726	3.80726		3.74234	3.74234	3.73025		3.70944	3.69078	3.69297		3.73357	3.70656	3.66697		3.63796	3.62263	3.62421		3.68184	3.78656	3.77893		3.773	3.77867	3.77867		3.8651	3.88	3.83927
0.727205	4.52622	4.19913	4.05571		3.96388	3.91115	3.91115		3.86781	3.80763	3.80763		3.74207	3.74207	3.73046		3.70932	3.6901	3.69278		3.73271	3.70555	3.66701		3.63791	3.62228	3.62413		3.68097	3.78677	3.77908		3.77355	3.77871	3.77871		3.86446	3.87951	3.83829
0.734405	4.5254	4.19938	4.05636		3.96319	3.91147	3.91147		3.86699	3.80809	3.80809		3.74171	3.74171	3.73033		3.70914	3.68952	3.69275		3.7317	3.7047	3.66714		3.63816	3.62225	3.62383		3.68035	3.78708	3.77941		3.77399	3.77902	3.77902		3.86388	3.87893	3.8375
0.741605	4.5247	4.20001	4.05673		3.96264	3.91166	3.91166		3.86611	3.80861	3.80861		3.74135	3.74135	3.72988		3.70896	3.68913	3.69289		3.73065	3.70405	3.66731		3.6388	3.62254	3.62343		3.68006	3.7874	3.77983		3.77425	3.7796	3.7796		3.86339	3.87838	3.83692
0.748805	4.52421	4.20094	4.05676		3.96221	3.91172	3.91172		3.86524	3.80907	3.80907		3.74101	3.74101	3.72919		3.70885	3.68904	3.69316		3.72966	3.70361	3.6674		3.63984	3.62304	3.62306		3.68009	3.78766	3.78028		3.77431	3.78044	3.78044		3.86302	3.878	3.83652
0.756005	4.52397	4.20205	4.05647		3.96187	3.91164	3.91164		3.86446	3.80936	3.80936		3.74065	3.74065	3.72835		3.70884	3.68932	3.69354		3.72884	3.70342	3.66732		3.64125	3.62358	3.62282		3.68043	3.78783	3.78067		3.77423	3.78138	3.78138		3.86279	3.87784	3.8363
0.763205	4.52394	4.20316	4.05592		3.96158	3.91144	3.91144		3.86375	3.80932	3.80932		3.74026	3.74026	3.72749		3.70896	3.69	3.694		3.7283	3.70345	3.66701		3.64287	3.62403	3.62276		3.68105	3.78788	3.78092		3.77403	3.78224	3.78224		3.86271	3.87788	3.83623
0.770405	4.52405	4.20413	4.05516		3.96129	3.91117	3.91117		3.86309	3.80883	3.80883		3.73987	3.73987	3.72668		3.70914	3.69104	3.69452		3.72808	3.70369	3.66642		3.64453	3.6243	3.6229		3.68193	3.78783	3.78097		3.7738	3.78283	3.78283		3.8628	3.87806	3.83624
0.777605	4.52419	4.20485	4.0543		3.961	3.91083	3.91083		3.86242	3.80787	3.80787		3.73952	3.73952	3.72598		3.70932	3.69232	3.69505		3.72817	3.70409	3.66561		3.64606	3.62434	3.62315		3.68301	3.7877	3.78076		3.77358	3.78305	3.78305		3.8631	3.87825	3.83623
0.784805	4.52425	4.20526	4.05346		3.96067	3.91053	3.91053		3.86176	3.80656	3.80656		3.73926	3.73926	3.72536		3.70942	3.69371	3.6956		3.7285	3.70459	3.6647		3.64732	3.62413	3.62348		3.6842	3.78759	3.78026		3.77339	3.78289	3.78289		3.8636	3.87836	3.83608
0.792005	4.52416	4.20538	4.05279		3.96031	3.91029	3.91029		3.86111	3.80499	3.80499		3.73908	3.73908	3.72484		3.70939	3.69508	3.69609		3.72897	3.70514	3.66383		3.6482	3.62365	3.62378		3.68538	3.78759	3.77948		3.77329	3.78233	3.78233		3.86426	3.87827	3.83574
0.799205	4.52391	4.20519	4.05236		3.95994	3.91015	3.91015		3.86049	3.80332	3.80332		3.73898	3.73898	3.72437		3.70915	3.69624	3.69645		3.72947	3.7057	3.66318		3.64866	3.623	3.62399		3.68646	3.78778	3.77846		3.77328	3.78143	3.78143		3.86504	3.87797	3.83521
0.806405	4.52352	4.20477	4.05219		3.9596	3.91009	3.91009		3.85992	3.80165	3.80165		3.73902	3.73902	3.72393		3.70863	3.69709	3.6966		3.72993	3.70624	3.66287		3.64866	3.62233	3.62405		3.68731	3.78817	3.7773		3.77333	3.78029	3.78029		3.86586	3.87753	3.83456
0.813605	4.52307	4.20419	4.05222		3.95932	3.91005	3.91005		3.85942	3.80015	3.80015		3.7392	3.7392	3.72353		3.70777	3.69753	3.6965		3.73033	3.70672	3.66299		3.64827	3.62179	3.62388		3.68783	3.7887	3.77611		3.77339	3.77906	3.77906		3.86662	3.87703	3.83382
0.820805	4.5227	4.2035	4.05239		3.95909	3.91003	3.91003		3.85903	3.799	3.799		3.73955	3.73955	3.72316		3.70662	3.69755	3.69615		3.7307	3.7071	3.66352		3.64756	3.62148	3.62347		3.68797	3.78926	3.77502		3.77337	3.77792	3.77792		3.86723	3.87658	3.83303
0.828005	4.52249	4.20281	4.05265		3.9589	3.91006	3.91006		3.8588	3.79834	3.79834		3.74	3.74	3.72286		3.70525	3.69721	3.69554		3.73108	3.7074	3.6644		3.64664	3.62139	3.62286		3.6877	3.78975	3.77414		3.77321	3.777	3.777		3.86754	3.87625	3.83224
0.835205	4.52251	4.20215	4.05295		3.95872	3.91015	3.91015		3.8588	3.79819	3.79819		3.74046	3.74046	3.72266		3.70379	3.6966	3.69467		3.7315	3.70764	3.66549		3.64557	3.62146	3.62214		3.68708	3.79005	3.77355		3.7729	3.77639	3.77639		3.86744	3.87605	3.83152
0.842405	4.52276	4.20158	4.05324		3.95855	3.91034	3.91034		3.85901	3.79844	3.79844		3.74082	3.74082	3.7226		3.70238	3.69582	3.69358		3.73191	3.70789	3.6666		3.64437	3.6216	3.62141		3.68621	3.79008	3.7733		3.77246	3.77605	3.77605		3.86686	3.87598	3.83094
0.849605	4.52322	4.20116	4.05348		3.95837	3.91062	3.91062		3.85942	3.79896	3.79896		3.74106	3.74106	3.72269		3.70113	3.69496	3.6923		3.73233	3.7082	3.66761		3.64303	3.62173	3.62074		3.68519	3.78981	3.77343		3.77193	3.77596	3.77596		3.86583	3.87595	3.83049
0.856805	4.52382	4.20093	4.05365		3.9582	3.91099	3.91099		3.85999	3.79965	3.79965		3.74113	3.74113	3.72296		3.70013	3.69416	3.69093		3.73269	3.70857	3.66842		3.64155	3.62177	3.62014		3.68415	3.78924	3.77398		3.77135	3.7761	3.7761		3.86441	3.87589	3.83017
0.864006	4.52449	4.20091	4.05377		3.95799	3.91149	3.91149		3.8607	3.80039	3.80039		3.74106	3.74106	3.72337		3.69945	3.6935	3.68958		3.73294	3.70896	3.66898		3.63997	3.62167	3.61964		3.68317	3.78847	3.77489		3.77073	3.77643	3.77643		3.86275	3.87565	3.82994
0.871206	4.52515	4.2011	4.05386		3.95772	3.9121	3.9121		3.86158	3.80108	3.80108		3.74082	3.74082	3.72382		3.69907	3.69304	3.68837		3.733	3.70933	3.66929		3.63833	3.62142	3.61931		3.68235	3.78766	3.77609		3.7701	3.77685	3.77685		3.86102	3.87518	3.82978
0.878406	4.52572	4.20148	4.05393		3.95736	3.91276	3.91276		3.8626	3.80158	3.80158		3.74046	3.74046	3.72419		3.69895	3.69281	3.68736		3.73279	3.70967	3.66939		3.63669	3.62103	3.61916		3.68174	3.78698	3.77747		3.76949	3.77722	3.77722		3.85936	3.87447	3.82969
0.885606	4.52615	4.20203	4.05396		3.95686	3.91334	3.91334		3.86369	3.80177	3.80177		3.74	3.74	3.72435		3.69898	3.69273	3.68659		3.73228	3.70994	3.66933		3.63512	3.62059	3.61919		3.68137	3.78652	3.7789		3.76894	3.77745	3.77745		3.85792	3.87357	3.82962
0.892806	4.5264	4.20263	4.05391		3.95623	3.91372	3.91372		3.86478	3.80164	3.80164		3.73954	3.73954	3.72422		3.69911	3.69272	3.68606		3.73152	3.7101	3.66915		3.63371	3.62019	3.61934		3.68126	3.78634	3.78026		3.76847	3.77747	3.77747		3.8568	3.87259	3.8295
0.900006	4.52651	4.20319	4.05378		3.9555	3.91382	3.91382		3.86574	3.80122	3.80122		3.73917	3.73917	3.72379		3.69924	3.69271	3.68581		3.73058	3.71014	3.66889		3.63256	3.6199	3.61955		3.68136	3.7864	3.78141		3.76803	3.77731	3.77731		3.85607	3.87166	3.82928
0.907206	4.52647	4.20362	4.05356		3.95473	3.91363	3.91363		3.86652	3.80064	3.80064		3.73898	3.73898	3.72302		3.69935	3.69266	3.68581		3.72954	3.71002	3.66851		3.63175	3.61977	3.61983		3.68164	3.78661	3.78228		3.76761	3.77703	3.77703		3.85579	3.87086	3.82892
0.914406	4.52634	4.20389	4.05326		3.95398	3.91315	3.91315		3.86701	3.8	3.8		3.73897	3.73897	3.72197		3.69941	3.69254	3.68602		3.72843	3.70976	3.66798		3.63135	3.6198	3.6202		3.682	3.78685	3.7828		3.76719	3.77671	3.77671		3.85592	3.8703	3.82844
0.921606	4.52613	4.20393	4.05292		3.95334	3.91241	3.91241		3.86719	3.79938	3.79938		3.73915	3.73915	3.72075		3.69946	3.69229	3.68636		3.7273	3.70938	3.66724		3.63141	3.61997	3.62064		3.68236	3.78696	3.7829		3.76682	3.77642	3.77642		3.85635	3.87003	3.82786
0.928806	4.52587	4.20375	4.05257		3.9529	3.91148	3.91148		3.86702	3.79881	3.79881		3.73952	3.73952	3.7195		3.69955	3.69193	3.68676		3.72623	3.70891	3.66625		3.63191	3.62021	3.62106		3.68264	3.78679	3.78262		3.76656	3.77625	3.77625		3.85698	3.87	3.82724
0.936006	4.52556	4.20339	4.05229		3.95271	3.91044	3.91044		3.86655	3.79836	3.79836		3.74001	3.74001	3.71842		3.69977	3.69148	3.68716		3.72534	3.70842	3.66506		3.63281	3.62044	3.62136		3.68271	3.7863	3.78204		3.76644	3.77627	3.77627		3.85771	3.87017	3.82667
0.943206	4.52521	4.20291	4.05217		3.95281	3.90939	3.90939		3.86587	3.79807	3.79807		3.74057	3.74057	3.71765		3.70013	3.69102	3.68751		3.72469	3.70789	3.66371		3.63399	3.6206	3.62149		3.68252	3.78551	3.7813		3.76642	3.77653	3.77653		3.85846	3.87039	3.8262
0.950406	4.52482	4.20241	4.05229		3.95317	3.90841	3.90841		3.86508	3.79796	3.79796		3.74107	3.74107	3.71729		3.70058	3.69062	3.68777		3.72431	3.70737	3.6623		3.63528	3.62064	3.6214		3.68202	3.78454	3.78057		3.76639	3.77696	3.77696		3.85919	3.87058	3.82589
0.957606	4.52436	4.202	4.05266		3.95376	3.90751	3.90751		3.86434	3.79798	3.79798		3.74134	3.74134	3.7173		3.70104	3.69031	3.68791		3.72419	3.70687	3.66094		3.63646	3.6205	3.62107		3.68124	3.78353	3.78		3.7663	3.77746	3.77746		3.85977	3.87065	3.82575
0.964806	4.52383	4.20174	4.05326		3.95448	3.90666	3.90666		3.8637	3.79805	3.79805		3.74131	3.74131	3.71765		3.70141	3.69008	3.68793		3.72432	3.70643	3.65977		3.63737	3.62017	3.62045		3.68029	3.78266	3.77969		3.76611	3.77795	3.77795		3.86009	3.87052	3.82576
0.972006	4.52324	4.20161	4.05401		3.95521	3.90587	3.90587		3.86322	3.7981	3.7981		3.741	3.741	3.71821		3.70158	3.68992	3.68783		3.72469	3.70613	3.65893		3.63785	3.61961	3.61959		3.67933	3.78206	3.77969		3.76584	3.77835	3.77835		3.86008	3.87014	3.82584
0.979206	4.52259	4.20156	4.0548		3.95582	3.90513	3.90513		3.86287	3.79809	3.79809		3.7405	3.7405	3.71882		3.70147	3.68982	3.68764		3.72525	3.70603	3.65848		3.63781	3.61884	3.61856		3.67856	3.78182	3.77995		3.76551	3.77863	3.77863		3.85972	3.86953	3.82594
0.986406	4.52192	4.20154	4.05554		3.95624	3.90447	3.90447		3.86258	3.79798	3.79798		3.73992	3.73992	3.7193		3.70106	3.68979	3.6874		3.7259	3.70614	3.65846		3.63724	3.61793	3.61753		3.67811	3.78196	3.7804		3.7652	3.77878	3.77878		3.85908	3.86878	3.82602
0.993606	4.52129	4.20148	4.05611		3.95646	3.90387	3.90387		3.86224	3.79778	3.79778		3.73936	3.73936	3.71953		3.70039	3.6898	3.68717		3.72653	3.70646	3.65878		3.63626	3.61693	3.61665		3.67808	3.78245	3.78093		3.76499	3.77882	3.77882		3.85827	3.86798	3.82607
1.00081	4.52076	4.20129	4.05644		3.9565	3.90329	3.90329		3.86181	3.79747	3.79747		3.73893	3.73893	3.71944		3.69958	3.68985	3.68702		3.72704	3.70699	3.65937		3.63507	3.61593	3.61608		3.67849	3.7832	3.7814		3.76504	3.77877	3.77877		3.85737	3.86725	3.82615
1.00801	4.52034	4.20087	4.05644		3.95638	3.90276	3.90276		3.86119	3.79706	3.79706		3.73876	3.73876	3.71909		3.69879	3.68993	3.68697		3.72744	3.70769	3.66008		3.63389	3.615	3.61586		3.67929	3.78412	3.78171		3.76544	3.77867	3.77867		3.85647	3.86667	3.82634
1.01521	4.52004	4.20014	4.0561		3.95609	3.90226	3.90226		3.86039	3.7966	3.7966		3.73892	3.73892	3.71856		3.69821	3.69001	3.68702		3.72778	3.70849	3.66081		3.6329	3.61425	3.61598		3.68037	3.78513	3.78176		3.76618	3.77851	3.77851		3.85571	3.86627	3.82672
1.02241	4.5198	4.1991	4.05543		3.95564	3.90181	3.90181		3.85942	3.79611	3.79611		3.73937	3.73937	3.71797		3.69797	3.69007	3.68714		3.72812	3.70926	3.66151		3.6322	3.61374	3.6164		3.68156	3.78615	3.7815		3.76716	3.77828	3.77828		3.85522	3.86612	3.82736
1.02961	4.51955	4.19787	4.0545		3.95508	3.90142	3.90142		3.85834	3.79565	3.79565		3.73997	3.73997	3.71746		3.69819	3.69003	3.68728		3.72852	3.70985	3.66214		3.63184	3.61353	3.61701		3.68267	3.78712	3.78098		3.76822	3.77794	3.77794		3.8551	3.86621	3.82829
1.03681	4.51922	4.19656	4.05338		3.95446	3.90108	3.90108		3.85725	3.79519	3.79519		3.74053	3.74053	3.71712		3.69887	3.68984	3.68741		3.72903	3.71011	3.66267		3.63177	3.61364	3.61766		3.68355	3.78799	3.78028		3.76914	3.77746	3.77746		3.85538	3.86649	3.82945
1.04401	4.51869	4.19533	4.05216		3.9538	3.9008	3.9008		3.85627	3.7948	3.7948		3.74086	3.74086	3.71701		3.69987	3.68946	3.68753		3.72962	3.70997	3.66311		3.63189	3.61403	3.61823		3.68411	3.7887	3.77945		3.76974	3.77684	3.77684		3.85602	3.8669	3.83074
1.05121	4.51787	4.19428	4.05094		3.95309	3.90061	3.90061		3.85552	3.79447	3.79447		3.74089	3.74089	3.71714		3.70104	3.68885	3.68767		3.73024	3.70939	3.66347		3.63207	3.61462	3.61864		3.68435	3.78917	3.77855		3.76983	3.77612	3.77612		3.85695	3.8674	3.83202
1.05841	4.5167	4.19351	4.04982		3.95233	3.90054	3.90054		3.8551	3.79426	3.79426		3.7406	3.7406	3.71745		3.70216	3.68803	3.68785		3.73079	3.70842	3.66381		3.63215	3.61534	3.61885		3.68432	3.78933	3.77759		3.76934	3.77539	3.77539		3.85811	3.86794	3.83317
1.06561	4.51518	4.19308	4.04889		3.95156	3.9006	3.9006		3.85509	3.79416	3.79416		3.73999	3.73999	3.71788		3.70307	3.68706	3.68813		3.73113	3.70714	3.66412		3.63212	3.61607	3.61887		3.68413	3.78907	3.77659		3.76831	3.77481	3.77481		3.85944	3.86851	3.83409
1.07281	4.51343	4.19303	4.04822		3.95084	3.90078	3.90078		3.85548	3.79416	3.79416		3.73908	3.73908	3.71836		3.70368	3.68607	3.68853		3.73113	3.70569	3.66446		3.632	3.61674	3.61876		3.68386	3.78837	3.7756		3.76688	3.77448	3.77448		3.86083	3.86912	3.83477
1.08001	4.51158	4.19332	4.04783		3.95028	3.90102	3.90102		3.85624	3.79423	3.79423		3.73799	3.73799	3.71888		3.70396	3.68519	3.68903		3.7307	3.7042	3.66482		3.63193	3.61732	3.61859		3.68357	3.78725	3.7747		3.76526	3.77451	3.77451		3.8622	3.86974	3.83521
1.08721	4.50977	4.1939	4.04771		3.9499	3.90128	3.90128		3.85725	3.79438	3.79438		3.73685	3.73685	3.71938		3.70395	3.68456	3.68959		3.72984	3.70281	3.6652		3.63203	3.61776	3.61847		3.6833	3.78581	3.77392		3.76363	3.77495	3.77495		3.86345	3.87033	3.83547
1.09441	4.50809	4.19466	4.04782		3.94972	3.90153	3.90153		3.85839	3.79462	3.79462		3.73577	3.73577	3.71987		3.70376	3.68423	3.69011		3.72858	3.70163	3.66567		3.6324	3.6181	3.61844		3.68302	3.78422	3.77327		3.76214	3.77582	3.77582		3.86449	3.87082	3.83564
1.10161	4.50662	4.19552	4.0481		3.94971	3.9018	3.9018		3.8595	3.79491	3.79491		3.73485	3.73485	3.72029		3.70352	3.68427	3.69046		3.72708	3.70069	3.66624		3.63311	3.61836	3.6185		3.68266	3.78265	3.77274		3.76089	3.77702	3.77702		3.86524	3.87118	3.83579
1.10881	4.50544	4.1964	4.04846		3.94987	3.90213	3.90213		3.86041	3.79525	3.79525		3.7341	3.7341	3.72062		3.70333	3.68465	3.69051		3.72551	3.69999	3.66693		3.63417	3.61857	3.61857		3.68212	3.78124	3.77237		3.75994	3.7784	3.7784		3.86568	3.87135	3.83596
1.11601	4.50463	4.19723	4.04882		3.95017	3.90255	3.90255		3.86099	3.79555	3.79555		3.73352	3.73352	3.72084		3.70327	3.6853	3.69015		3.72406	3.69949	3.66771		3.63553	3.61875	3.61857		3.68137	3.78013	3.77214		3.75933	3.77974	3.77974		3.86584	3.87127	3.83614
1.12321	4.50422	4.19798	4.04913		3.95055	3.90307	3.90307		3.86113	3.79581	3.79581		3.7331	3.7331	3.72089		3.70329	3.6861	3.68935		3.72288	3.6991	3.6685		3.63708	3.61887	3.61845		3.68035	3.77941	3.77201		3.75909	3.78084	3.78084		3.86584	3.87096	3.83628
1.13041	4.50416	4.19862	4.04937		3.95097	3.90373	3.90373		3.86084	3.79603	3.79603		3.7329	3.7329	3.72071		3.7033	3.68692	3.68821		3.72211	3.6988	3.66928		3.63867	3.61891	3.61819		3.67915	3.77913	3.7719		3.75918	3.78152	3.78152		3.86578	3.87046	3.83629
1.13761	4.50439	4.19909	4.04952		3.95131	3.90448	3.90448		3.86021	3.79622	3.79622		3.73294	3.73294	3.72027		3.70319	3.68764	3.68683		3.72177	3.69856	3.66999		3.64015	3.61889	3.61778		3.67786	3.77923	3.77169		3.75958	3.78171	3.78171		3.86576	3.86986	3.83615
1.14481	4.50487	4.19935	4.04956		3.95154	3.90527	3.90527		3.85938	3.79639	3.79639		3.73324	3.73324	3.71957		3.70285	3.68817	3.68538		3.72185	3.69839	3.67059		3.64143	3.61878	3.6172		3.67665	3.77961	3.77136		3.76028	3.78138	3.78138		3.86586	3.86925	3.83583
1.15201	4.50557	4.19938	4.04952		3.95161	3.906	3.906		3.85854	3.79654	3.79654		3.73376	3.73376	3.7187		3.70219	3.68848	3.68398		3.72222	3.69835	3.67103		3.64248	3.61859	3.61644		3.67571	3.78016	3.77095		3.76127	3.78063	3.78063		3.86606	3.86878	3.83535
1.15921	4.50646	4.19921	4.0494		3.95151	3.90655	3.90655		3.85776	3.79665	3.79665		3.73449	3.73449	3.71776		3.70122	3.68861	3.68277		3.72279	3.69848	3.67129		3.64325	3.61831	3.61555		3.67516	3.78081	3.77051		3.7625	3.77958	3.77958		3.8663	3.86854	3.83476
1.16641	4.50746	4.19884	4.04923		3.95126	3.90682	3.90682		3.85715	3.79672	3.79672		3.7354	3.7354	3.7169		3.69999	3.68859	3.68187		3.72346	3.69884	3.67137		3.64373	3.61795	3.61457		3.67509	3.78152	3.77007		3.76381	3.7784	3.7784		3.86646	3.86859	3.83415
1.17361	4.50838	4.19832	4.04901		3.95091	3.90677	3.90677		3.85674	3.79676	3.79676		3.73639	3.73639	3.71621		3.69867	3.68848	3.68136		3.72415	3.69948	3.67126		3.64389	3.61758	3.61358		3.67547	3.78223	3.7697		3.76502	3.77728	3.77728		3.86639	3.86888	3.83358
1.18081	4.50909	4.19771	4.04875		3.95049	3.90646	3.90646		3.85653	3.79674	3.79674		3.73738	3.73738	3.7158		3.69739	3.68835	3.68121		3.72479	3.70042	3.67094		3.64372	3.61729	3.61261		3.67622	3.78286	3.76945		3.7659	3.77638	3.77638		3.86595	3.86935	3.83313
1.18801	4.50945	4.19704	4.04843		3.95008	3.90593	3.90593		3.85649	3.79665	3.79665		3.73821	3.73821	3.71572		3.69629	3.68825	3.68135		3.72534	3.7016	3.67032		3.6432	3.61711	3.61172		3.67723	3.78333	3.76939		3.76629	3.77581	3.77581		3.86508	3.86988	3.83283
1.19521	4.50945	4.19634	4.04806		3.9497	3.90527	3.90527		3.85656	3.79649	3.79649		3.73878	3.73878	3.71602		3.69546	3.68817	3.6817		3.72578	3.70293	3.66932		3.64233	3.61702	3.61094		3.67829	3.78361	3.76956		3.76613	3.77561	3.77561		3.86381	3.87038	3.83267
1.20241	4.50913	4.19567	4.0476		3.94938	3.90459	3.90459		3.85671	3.79623	3.79623		3.73904	3.73904	3.71668		3.69494	3.68811	3.68217		3.72612	3.70429	3.66785		3.6411	3.61694	3.61037		3.67921	3.78374	3.76996		3.76543	3.77578	3.77578		3.86229	3.8708	3.83263
1.20961	4.50855	4.19508	4.04702		3.94911	3.90396	3.90396		3.85692	3.79593	3.79593		3.73899	3.73899	3.71763		3.69473	3.68804	3.6827		3.72639	3.70554	3.66595		3.63957	3.61685	3.61009		3.67986	3.78377	3.77054		3.76434	3.77622	3.77622		3.86071	3.87108	3.83263
1.21681	4.5078	4.19459	4.04631		3.9489	3.90348	3.90348		3.85719	3.79565	3.79565		3.73863	3.73863	3.71881		3.69479	3.68789	3.68327		3.72658	3.70657	3.66369		3.63783	3.61676	3.61018		3.68015	3.78372	3.7712		3.76305	3.77687	3.77687		3.85925	3.87121	3.83261
1.22401	4.50702	4.19425	4.04546		3.94873	3.9032	3.9032		3.85751	3.79547	3.79547		3.73801	3.73801	3.7201		3.69506	3.6876	3.68384		3.72666	3.70728	3.66118		3.63601	3.61671	3.61062		3.68007	3.78363	3.7719		3.76177	3.7776	3.7776		3.85808	3.87118	3.83253
1.23121	4.50639	4.19407	4.0445		3.94855	3.90311	3.90311		3.85786	3.79546	3.79546		3.73722	3.73722	3.72142		3.69545	3.68711	3.68441		3.72657	3.7076	3.65857		3.63429	3.61673	3.61137		3.6797	3.78353	3.77253		3.76072	3.77829	3.77829		3.85733	3.87104	3.83235
1.23841	4.50606	4.19406	4.04345		3.94832	3.90317	3.90317		3.8582	3.79559	3.79559		3.73632	3.73632	3.72267		3.69586	3.68644	3.68499		3.72627	3.70753	3.65607		3.63281	3.61677	3.61229		3.67908	3.78349	3.77303		3.76006	3.7788	3.7788		3.85703	3.87079	3.83209
1.24561	4.50613	4.19421	4.04239		3.94806	3.90327	3.90327		3.85851	3.79583	3.79583		3.73539	3.73539	3.72373		3.69627	3.68566	3.68561		3.72576	3.70712	3.65391		3.63167	3.61681	3.61329		3.67831	3.78355	3.77333		3.75986	3.77902	3.77902		3.85718	3.87046	3.83179
1.25281	4.50652	4.19446	4.04143		3.9478	3.90333	3.90333		3.85873	3.79608	3.79608		3.73449	3.73449	3.72451		3.69668	3.68485	3.68627		3.72503	3.70652	3.65227		3.63092	3.6169	3.61425		3.6775	3.78372	3.7734		3.76011	3.77889	3.77889		3.85762	3.87002	3.8315
1.26001	4.50711	4.19473	4.04063		3.9476	3.90326	3.90326		3.8588	3.79629	3.79629		3.73363	3.73363	3.72491		3.69708	3.68407	3.68696		3.7241	3.70584	3.65126		3.63055	3.61709	3.61514		3.67681	3.78398	3.7733		3.7607	3.77841	3.77841		3.85825	3.86944	3.83129
1.26721	4.50773	4.19492	4.04006		3.9475	3.903	3.903		3.85868	3.7964	3.7964		3.73284	3.73284	3.72485		3.69748	3.68343	3.68761		3.72303	3.70523	3.65083		3.63054	3.61738	3.61591		3.67635	3.78428	3.77311		3.76146	3.77764	3.77764		3.85895	3.86875	3.83117
1.27441	4.50827	4.19497	4.0397		3.9475	3.90251	3.90251		3.85841	3.79636	3.79636		3.73214	3.73214	3.72432		3.69787	3.68299	3.68813		3.72186	3.70479	3.6509		3.63079	3.61768	3.61657		3.67623	3.78456	3.77298		3.76231	3.77673	3.77673		3.85967	3.86798	3.83115
1.28161	4.50867	4.19482	4.03948		3.9476	3.90177	3.90177		3.85808	3.79611	3.79611		3.73152	3.73152	3.72332		3.69821	3.68287	3.68846		3.72069	3.70462	3.65134		3.6312	3.61788	3.61716		3.67646	3.78477	3.77307		3.76316	3.77585	3.77585		3.86032	3.86719	3.83118
1.28881	4.50885	4.19447	4.03934		3.94779	3.90079	3.90079		3.85777	3.79567	3.79567		3.73098	3.73098	3.72195		3.6985	3.68308	3.68851		3.71966	3.70471	3.65201		3.63168	3.61791	3.61772		3.67703	3.78487	3.77347		3.764	3.77517	3.77517		3.86089	3.86642	3.8312
1.29601	4.50876	4.19395	4.03918		3.94806	3.89966	3.89966		3.85754	3.79512	3.79512		3.73057	3.73057	3.72026		3.69872	3.68361	3.68829		3.71888	3.70502	3.6528		3.63219	3.6178	3.61833		3.67789	3.78481	3.77424		3.7648	3.77485	3.77485		3.8613	3.86571	3.83112
1.30321	4.50843	4.19331	4.03895		3.94841	3.89849	3.89849		3.85734	3.7946	3.7946		3.73033	3.73033	3.71836		3.6989	3.68431	3.68782		3.71847	3.70545	3.65359		3.63273	3.61758	3.61899		3.67897	3.78457	3.77534		3.76557	3.77493	3.77493		3.8615	3.86513	3.8309
1.31041	4.5079	4.19267	4.03862		3.94881	3.89743	3.89743		3.85718	3.79419	3.79419		3.73037	3.73037	3.71639		3.69902	3.68507	3.68714		3.71852	3.70589	3.65436		3.63333	3.61731	3.61965		3.68013	3.78411	3.77666		3.7663	3.77539	3.77539		3.8615	3.86475	3.8305
1.31761	4.50729	4.19217	4.03818		3.94929	3.89665	3.89665		3.85703	3.79391	3.79391		3.73067	3.73067	3.71448		3.69909	3.68576	3.68633		3.71909	3.70625	3.65511		3.634	3.61697	3.62018		3.68122	3.78341	3.77803		3.76702	3.77615	3.77615		3.86126	3.86457	3.82994
1.32481	4.50668	4.19188	4.03768		3.94985	3.89622	3.89622		3.85689	3.79377	3.79377		3.7312	3.7312	3.71277		3.69917	3.68633	3.68549		3.72021	3.70646	3.65587		3.63476	3.6166	3.62046		3.68212	3.78247	3.77921		3.76769	3.77708	3.77708		3.8608	3.86458	3.82929
1.33201	4.50609	4.19185	4.0372		3.95054	3.89621	3.89621		3.85674	3.79375	3.79375		3.73189	3.73189	3.71138		3.69926	3.68671	3.68471		3.72184	3.70645	3.65665		3.6356	3.61624	3.62044		3.68273	3.78135	3.78001		3.76828	3.77799	3.77799		3.86016	3.86474	3.82865
1.33921	4.50544	4.19205	4.03683		3.9514	3.89659	3.89659		3.85651	3.79382	3.79382		3.73269	3.73269	3.71039		3.69943	3.68686	3.68407		3.72386	3.70619	3.65746		3.63649	3.61595	3.62008		3.68299	3.78017	3.78029		3.76874	3.77873	3.77873		3.85941	3.86503	3.82814
1.34641	4.50466	4.19242	4.03667		3.95244	3.8973	3.8973		3.85618	3.79398	3.79398		3.73352	3.73352	3.70986		3.69971	3.6868	3.6836		3.72608	3.70569	3.6583		3.63737	3.61574	3.61945		3.6829	3.77905	3.78		3.76903	3.77916	3.77916		3.85864	3.86543	3.82785
1.35361	4.50372	4.19284	4.03678		3.95359	3.8982	3.8982		3.85575	3.79418	3.79418		3.73424	3.73424	3.70981		3.70008	3.68658	3.6833		3.72828	3.70501	3.65914		3.63816	3.6156	3.6186		3.68246	3.77811	3.77917		3.76915	3.77927	3.77927		3.85797	3.86589	3.82779
1.36081	4.50258	4.19319	4.03714		3.95474	3.89916	3.89916		3.85532	3.79434	3.79434		3.73477	3.73477	3.71019		3.70051	3.68631	3.68313		3.73026	3.70423	3.65993		3.63871	3.61552	3.61763		3.68171	3.77744	3.7779		3.76918	3.77917	3.77917		3.85749	3.86634	3.82792
1.36801	4.50124	4.19339	4.03771		3.95576	3.90002	3.90002		3.85495	3.79448	3.79448		3.73504	3.73504	3.71093		3.70092	3.68614	3.68304		3.73185	3.70339	3.66058		3.63892	3.61549	3.61665		3.68068	3.77713	3.7763		3.76912	3.77895	3.77895		3.85725	3.86673	3.82817
1.37521	4.49976	4.19337	4.03844		3.95649	3.90067	3.90067		3.85469	3.7946	3.7946		3.73507	3.73507	3.71187		3.70125	3.68609	3.68305		3.73292	3.70255	3.66097		3.63872	3.61553	3.61581		3.67944	3.77719	3.77454		3.76907	3.77873	3.77873		3.85728	3.86702	3.82844
1.38241	4.49823	4.19309	4.03923		3.95681	3.90105	3.90105		3.85457	3.79477	3.79477		3.73498	3.73498	3.71287		3.70144	3.68623	3.68315		3.7334	3.70176	3.66105		3.63812	3.6157	3.61522		3.67805	3.77758	3.77278		3.76905	3.77858	3.77858		3.85753	3.8672	3.8286
1.38961	4.49676	4.19258	4.04		3.95664	3.90114	3.90114		3.85456	3.795	3.795		3.73485	3.73485	3.71376		3.70142	3.68652	3.68334		3.73331	3.70106	3.6608		3.63719	3.61601	3.61487		3.67658	3.77812	3.77112		3.76912	3.77853	3.77853		3.85794	3.86732	3.82858
1.39681	4.49552	4.19192	4.04065		3.95597	3.90097	3.90097		3.85469	3.79528	3.79528		3.73476	3.73476	3.71443		3.70119	3.68691	3.68359		3.73272	3.70048	3.66023		3.63601	3.61651	3.61472		3.67512	3.77865	3.76964		3.76931	3.77858	3.77858		3.85841	3.86738	3.82833
1.40401	4.49463	4.19124	4.04107		3.95487	3.90066	3.90066		3.85495	3.79559	3.79559		3.73474	3.73474	3.71478		3.70075	3.68735	3.68389		3.73178	3.70002	3.65936		3.63469	3.61719	3.61466		3.67377	3.779	3.76836		3.76958	3.77871	3.77871		3.85887	3.86744	3.8279
1.41121	4.49417	4.19067	4.04118		3.9535	3.90027	3.90027		3.85535	3.79587	3.79587		3.73481	3.73481	3.71479		3.70015	3.68775	3.68426		3.73057	3.69964	3.65824		3.63341	3.618	3.61461		3.67263	3.77909	3.76731		3.7699	3.77885	3.77885		3.85927	3.86755	3.82737
1.41841	4.49412	4.1903	4.041		3.95203	3.89988	3.89988		3.85587	3.7961	3.7961		3.73495	3.73495	3.7145		3.69942	3.68801	3.68472		3.72919	3.69928	3.65699		3.63236	3.61882	3.61449		3.67181	3.77889	3.76649		3.7702	3.77888	3.77888		3.85953	3.86779	3.82687
1.42561	4.49442	4.19015	4.04057		3.95063	3.89956	3.89956		3.85649	3.79626	3.79626		3.7351	3.7351	3.71399		3.69863	3.68808	3.68528		3.72767	3.6989	3.65573		3.63169	3.61953	3.61425		3.67136	3.77845	3.76595		3.77043	3.77873	3.77873		3.85965	3.86819	3.8265
1.43281	4.49495	4.19015	4.03994		3.94945	3.89932	3.89932		3.85715	3.79631	3.79631		3.73515	3.73515	3.71336		3.6978	3.68794	3.68593		3.72609	3.69851	3.65458		3.63145	3.61999	3.61386		3.67132	3.77787	3.7657		3.77058	3.77833	3.77833		3.8596	3.8688	3.82633
1.44001	4.49558	4.19019	4.03922		3.94855	3.89916	3.89916		3.85783	3.79624	3.79624		3.73502	3.73502	3.71269		3.69695	3.68762	3.68662		3.72452	3.69807	3.65368		3.63162	3.62011	3.61331		3.67166	3.77728	3.76571		3.77058	3.77775	3.77775		3.85939	3.86957	3.82633
1.44721	4.49623	4.19016	4.03849		3.94796	3.89903	3.89903		3.85848	3.79608	3.79608		3.73472	3.73472	3.71208		3.69609	3.68715	3.68732		3.72304	3.6976	3.65312		3.63204	3.6198	3.61266		3.67233	3.77682	3.76598		3.77043	3.77707	3.77707		3.85906	3.87042	3.82646
1.45441	4.49684	4.18997	4.03786		3.94761	3.8989	3.8989		3.85909	3.79587	3.79587		3.73425	3.73425	3.71156		3.69524	3.68657	3.68802		3.72173	3.69709	3.65294		3.63259	3.61905	3.612		3.67323	3.77661	3.76648		3.77015	3.77637	3.77637		3.8586	3.87123	3.82662
1.46161	4.49733	4.18956	4.03742		3.94742	3.8987	3.8987		3.85965	3.7957	3.7957		3.73361	3.73361	3.71119		3.69444	3.68594	3.68865		3.72064	3.69658	3.65317		3.63309	3.61792	3.61143		3.67429	3.77669	3.7671		3.7698	3.77569	3.77569		3.85806	3.87188	3.82674
1.46881	4.49765	4.18889	4.0372		3.94728	3.8984	3.8984		3.86012	3.79561	3.79561		3.73283	3.73283	3.71098		3.69374	3.6853	3.68915		3.71982	3.6961	3.65375		3.6334	3.61649	3.61102		3.6754	3.77704	3.76773		3.76943	3.77509	3.77509		3.85745	3.87228	3.82676
1.47601	4.4978	4.18801	4.03718		3.94716	3.89795	3.89795		3.86043	3.79561	3.79561		3.73193	3.73193	3.71094		3.69319	3.68469	3.68946		3.71931	3.69561	3.65453		3.63337	3.61492	3.61075		3.67649	3.77764	3.76823		3.7691	3.77458	3.77458		3.85681	3.87236	3.82665
1.48321	4.49774	4.187	4.0373		3.94703	3.89733	3.89733		3.86053	3.7957	3.7957		3.73097	3.73097	3.71107		3.69288	3.68413	3.68957		3.71909	3.69515	3.6554		3.63294	3.61338	3.61058		3.67745	3.7784	3.7685		3.76881	3.77417	3.77417		3.85621	3.87208	3.82646
1.49041	4.49749	4.18602	4.03746		3.94692	3.89657	3.89657		3.86038	3.79585	3.79585		3.73002	3.73002	3.71138		3.69284	3.68361	3.68949		3.71912	3.69467	3.65618		3.63213	3.61203	3.61047		3.67822	3.77923	3.76847		3.76854	3.77383	3.77383		3.85568	3.87146	3.82621
1.49761	4.49705	4.18524	4.03756		3.94685	3.89576	3.89576		3.86002	3.79601	3.79601		3.72915	3.72915	3.7118		3.69309	3.68312	3.68929		3.7193	3.69421	3.65675		3.63107	3.61099	3.61038		3.67879	3.78002	3.76818		3.76828	3.77346	3.77346		3.85529	3.87053	3.82592
1.50481	4.49638	4.18473	4.03749		3.94682	3.89497	3.89497		3.85946	3.7961	3.7961		3.72837	3.72837	3.7123		3.69362	3.68263	3.68903		3.71949	3.69386	3.657		3.62996	3.61027	3.61025		3.67916	3.78069	3.76766		3.76799	3.773	3.773		3.85507	3.8694	3.82564
1.51201	4.4955	4.18454	4.03718		3.94685	3.89426	3.89426		3.8587	3.79605	3.79605		3.72775	3.72775	3.71279		3.69436	3.68214	3.68878		3.71956	3.69372	3.65688		3.62898	3.60985	3.61009		3.67932	3.78113	3.76707		3.76762	3.7724	3.7724		3.85501	3.86819	3.8254
1.51921	4.49442	4.18461	4.03664		3.94692	3.89371	3.89371		3.85778	3.79577	3.79577		3.72739	3.72739	3.71318		3.6952	3.68163	3.68862		3.7194	3.69389	3.65644		3.62827	3.60966	3.60996		3.67932	3.78134	3.76655		3.76712	3.77163	3.77163		3.85507	3.86701	3.82521
1.52641	4.49324	4.1849	4.0359		3.94698	3.89331	3.89331		3.85675	3.79521	3.79521		3.72739	3.72739	3.71345		3.69595	3.68111	3.68861		3.71895	3.69444	3.65579		3.62791	3.60965	3.60999		3.67919	3.78127	3.76629		3.76647	3.77071	3.77071		3.85523	3.86597	3.82507
1.53361	4.49206	4.18534	4.03505		3.94697	3.89308	3.89308		3.85572	3.7944	3.7944		3.72781	3.72781	3.71355		3.6965	3.68062	3.68876		3.71825	3.69535	3.65512		3.62795	3.60975	3.61027		3.67903	3.78091	3.76639		3.76571	3.76966	3.76966		3.85542	3.86517	3.82489
1.54081	4.49098	4.18592	4.03416		3.94679	3.893	3.893		3.85478	3.79342	3.79342		3.72857	3.72857	3.71348		3.69674	3.68019	3.689		3.71731	3.69658	3.65461		3.62831	3.60988	3.61089		3.67889	3.78034	3.76686		3.76494	3.76854	3.76854		3.85561	3.86465	3.8246
1.54801	4.49007	4.18655	4.03332		3.94641	3.89304	3.89304		3.85396	3.79234	3.79234		3.72956	3.72956	3.71321		3.69665	3.67988	3.68921		3.71622	3.69804	3.6544		3.62884	3.60992	3.61184		3.67886	3.77963	3.76765		3.76426	3.76745	3.76745		3.85576	3.86441	3.82419
1.55521	4.48936	4.18714	4.0326		3.94581	3.89311	3.89311		3.85324	3.7912	3.7912		3.73062	3.73062	3.7128		3.69623	3.67968	3.68928		3.71506	3.69958	3.65454		3.62933	3.60982	3.61308		3.67895	3.77891	3.76859		3.76373	3.76653	3.76653		3.85582	3.86442	3.82369
1.56241	4.48888	4.1876	4.03209		3.94508	3.89315	3.89315		3.85255	3.79006	3.79006		3.73159	3.73159	3.71229		3.69551	3.67957	3.68909		3.71394	3.701	3.65504		3.62961	3.60962	3.61454		3.67915	3.77833	3.76955		3.76335	3.76588	3.76588		3.85578	3.8646	3.82315
1.56961	4.48865	4.18788	4.03183		3.94433	3.89314	3.89314		3.85182	3.78902	3.78902		3.73229	3.73229	3.71175		3.69456	3.67952	3.68855		3.71299	3.70218	3.65585		3.62951	3.60935	3.61605		3.67943	3.77796	3.77034		3.76313	3.76556	3.76556		3.85563	3.8649	3.82259
1.57681	4.48864	4.18795	4.03181		3.94368	3.89305	3.89305		3.85103	3.78814	3.78814		3.73258	3.73258	3.71116		3.6935	3.67948	3.68763		3.7123	3.703	3.65689		3.62899	3.60909	3.61743		3.67972	3.77787	3.77085		3.76303	3.76564	3.76564		3.85539	3.86523	3.82202
1.58401	4.48875	4.18778	4.03203		3.94325	3.89292	3.89292		3.85016	3.7875	3.7875		3.73241	3.73241	3.71053		3.69245	3.67942	3.6863		3.71189	3.70343	3.65803		3.62804	3.60888	3.61847		3.67994	3.77806	3.77101		3.76301	3.76611	3.76611		3.85503	3.86552	3.82146
1.59121	4.4889	4.18734	4.03246		3.94312	3.89279	3.89279		3.84922	3.78709	3.78709		3.73182	3.73182	3.70981		3.69153	3.67928	3.68466		3.71174	3.7035	3.65913		3.62675	3.60872	3.61906		3.68006	3.77851	3.77088		3.76301	3.76696	3.76696		3.85455	3.86576	3.82101
1.59841	4.48897	4.18663	4.03308		3.94334	3.89266	3.89266		3.84824	3.78692	3.78692		3.73091	3.73091	3.709		3.69076	3.67901	3.68286		3.71186	3.70326	3.66006		3.62526	3.60869	3.61918		3.68007	3.77908	3.77058		3.76298	3.76807	3.76807		3.85398	3.86594	3.82074
1.60561	4.48893	4.18568	4.03391		3.94392	3.89253	3.89253		3.84725	3.78698	3.78698		3.72988	3.72988	3.70812		3.69014	3.67865	3.68109		3.71223	3.70275	3.66077		3.6238	3.60883	3.6189		3.67999	3.7796	3.77024		3.76289	3.76933	3.76933		3.85336	3.86607	3.82069
1.61281	4.48871	4.18459	4.03491		3.94485	3.89243	3.89243		3.84634	3.78727	3.78727		3.72893	3.72893	3.70719		3.68962	3.67827	3.67957		3.71284	3.70203	3.66122		3.62251	3.60923	3.61829		3.67985	3.77994	3.77001		3.76276	3.77058	3.77058		3.85281	3.86617	3.82086
1.62001	4.48828	4.18348	4.03602		3.94602	3.89239	3.89239		3.84551	3.78777	3.78777		3.72822	3.72822	3.70626		3.68919	3.67799	3.67848		3.71366	3.70113	3.6614		3.62156	3.60985	3.61749		3.67972	3.77997	3.76996		3.76266	3.77173	3.77173		3.85243	3.86621	3.82121
1.62721	4.48759	4.18244	4.03717		3.94731	3.89241	3.89241		3.84478	3.78844	3.78844		3.72785	3.72785	3.70539		3.68885	3.67789	3.67791		3.71459	3.70005	3.66133		3.62098	3.61065	3.61659		3.67962	3.7797	3.77012		3.76262	3.77274	3.77274		3.85232	3.86617	3.82169
1.63441	4.48665	4.18152	4.03828		3.94854	3.89251	3.89251		3.84406	3.7892	3.7892		3.72784	3.72784	3.70467		3.68859	3.67804	3.67787		3.71557	3.69885	3.66101		3.6208	3.61156	3.61573		3.67959	3.77916	3.77045		3.7627	3.77355	3.77355		3.85255	3.86599	3.8223
1.64161	4.48554	4.18075	4.03928		3.94958	3.89271	3.89271		3.84332	3.78997	3.78997		3.72813	3.72813	3.70421		3.68837	3.67842	3.67833		3.71652	3.69759	3.66048		3.62103	3.61249	3.61502		3.67963	3.77841	3.77087		3.76288	3.77415	3.77415		3.85311	3.86567	3.82293
1.64881	4.48441	4.18013	4.04011		3.95035	3.89301	3.89301		3.8425	3.79068	3.79068		3.7286	3.7286	3.70405		3.68815	3.67899	3.67918		3.7174	3.69639	3.65981		3.62161	3.61338	3.61454		3.67968	3.77756	3.77125		3.76307	3.77455	3.77455		3.85396	3.8652	3.82351
1.65601	4.4834	4.17965	4.04069		3.95075	3.89341	3.89341		3.84163	3.79129	3.79129		3.72906	3.72906	3.70417		3.68795	3.67967	3.68026		3.71814	3.69541	3.65912		3.62241	3.61408	3.61431		3.67963	3.77674	3.77147		3.76319	3.77479	3.77479		3.85495	3.8646	3.82389
1.66321	4.48264	4.17926	4.04098		3.95072	3.89387	3.89387		3.8408	3.79176	3.79176		3.72937	3.72937	3.70453		3.68776	3.68035	3.68133		3.71869	3.69475	3.65851		3.62331	3.61453	3.61431		3.67939	3.77609	3.77142		3.76314	3.77493	3.77493		3.85591	3.86394	3.824
1.67041	4.48224	4.17891	4.04095		3.95019	3.89431	3.89431		3.84018	3.79206	3.79206		3.72942	3.72942	3.70502		3.68757	3.68093	3.68218		3.71898	3.69446	3.65808		3.62418	3.61467	3.61447		3.67894	3.7757	3.77109		3.76284	3.77498	3.77498		3.85666	3.86335	3.82382
1.67761	4.48231	4.17852	4.04064		3.94919	3.89464	3.89464		3.83993	3.79213	3.79213		3.72923	3.72923	3.70558		3.68738	3.68131	3.68271		3.71902	3.69457	3.65789		3.62492	3.61451	3.6147		3.67826	3.77555	3.77051		3.7623	3.77498	3.77498		3.85706	3.86295	3.82335
1.68481	4.48285	4.17807	4.04016		3.94781	3.89479	3.89479		3.8402	3.7919	3.7919		3.72888	3.72888	3.7061		3.68714	3.68148	3.68291		3.71884	3.69505	3.65795		3.62545	3.61411	3.61493		3.6774	3.77554	3.76973		3.76154	3.77488	3.77488		3.85703	3.86282	3.82267
1.69201	4.4838	4.17753	4.03963		3.94619	3.89473	3.89473		3.84101	3.79136	3.79136		3.72848	3.72848	3.70652		3.68689	3.68149	3.68286		3.71851	3.69584	3.65825		3.62571	3.61354	3.61508		3.67642	3.77558	3.76883		3.76065	3.77473	3.77473		3.85661	3.86298	3.82181
1.69921	4.48499	4.17694	4.03911		3.94447	3.89448	3.89448		3.84227	3.79044	3.79044		3.72816	3.72816	3.70683		3.68673	3.6814	3.68267		3.71808	3.69678	3.65869		3.62567	3.61292	3.61503		3.67544	3.77553	3.76788		3.75974	3.77454	3.77454		3.85587	3.86333	3.82087
1.70641	4.48617	4.17631	4.03868		3.94278	3.8941	3.8941		3.84382	3.78915	3.78915		3.72803	3.72803	3.70708		3.68673	3.6813	3.68243		3.71757	3.69768	3.65918		3.6253	3.61233	3.61469		3.6746	3.77533	3.76692		3.75895	3.77437	3.77437		3.855	3.86378	3.81995
1.71361	4.48709	4.17567	4.03831		3.94123	3.8937	3.8937		3.84538	3.7875	3.7875		3.72815	3.72815	3.70736		3.68699	3.68121	3.68224		3.71699	3.69836	3.65957		3.6247	3.61184	3.61395		3.67403	3.77494	3.76601		3.75836	3.77428	3.77428		3.85419	3.86418	3.8192
1.72081	4.48757	4.1751	4.03806		3.93999	3.89335	3.89335		3.84667	3.78557	3.78557		3.7285	3.7285	3.70775		3.68752	3.68115	3.6822		3.71636	3.69871	3.65972		3.62393	3.61148	3.61278		3.67374	3.77439	3.76512		3.75803	3.77429	3.77429		3.85356	3.86441	3.8187
1.72801	4.48749	4.17469	4.0379		3.93913	3.89315	3.89315		3.84746	3.78347	3.78347		3.72897	3.72897	3.70827		3.68827	3.68109	3.68238		3.71566	3.69871	3.65952		3.62312	3.61127	3.61123		3.6737	3.77378	3.76425		3.75794	3.77441	3.77441		3.85322	3.86431	3.81849
1.73521	4.48684	4.1745	4.03779		3.93867	3.89316	3.89316		3.84766	3.78135	3.78135		3.72939	3.72939	3.70893		3.68915	3.68097	3.68277		3.7149	3.69837	3.65896		3.62238	3.61117	3.6094		3.67382	3.77328	3.76337		3.75803	3.77463	3.77463		3.8532	3.86381	3.81859
1.74241	4.48567	4.17455	4.03764		3.93857	3.89338	3.89338		3.8473	3.77939	3.77939		3.72962	3.72962	3.70964		3.69002	3.68075	3.68325		3.71404	3.69774	3.65809		3.62186	3.61111	3.60743		3.67401	3.77308	3.76252		3.75817	3.7749	3.7749		3.85344	3.86291	3.81899
1.74961	4.48413	4.17479	4.03733		3.93872	3.89373	3.89373		3.84652	3.77775	3.77775		3.72961	3.72961	3.71035		3.6907	3.68037	3.68366		3.71308	3.69684	3.65701		3.62169	3.61106	3.6055		3.67419	3.77328	3.76173		3.75826	3.77518	3.77518		3.85389	3.86173	3.81967
1.75681	4.48244	4.17514	4.03684		3.93901	3.89408	3.89408		3.84555	3.77655	3.77655		3.72938	3.72938	3.71097		3.69107	3.67982	3.68384		3.71206	3.69575	3.65587		3.62194	3.61105	3.60381		3.67427	3.77396	3.76104		3.7582	3.77544	3.77544		3.85446	3.86042	3.82063
1.76401	4.4808	4.17558	4.03619		3.93938	3.89436	3.89436		3.84462	3.77588	3.77588		3.72901	3.72901	3.71142		3.69105	3.67914	3.68369		3.71107	3.69458	3.65484		3.6226	3.61109	3.60253		3.67419	3.77506	3.76049		3.75797	3.77563	3.77563		3.85511	3.85914	3.82176
1.77121	4.4794	4.17603	4.03544		3.93972	3.89454	3.89454		3.84387	3.77576	3.77576		3.72859	3.72859	3.71163		3.69066	3.67838	3.68316		3.71021	3.69346	3.65404		3.62365	3.61121	3.60184		3.67398	3.77644	3.76012		3.75756	3.77573	3.77573		3.85582	3.85802	3.82293
1.77841	4.47835	4.17646	4.03466		3.94	3.89463	3.89463		3.84345	3.7761	3.7761		3.7282	3.7282	3.71161		3.68998	3.67762	3.68221		3.70955	3.69247	3.65356		3.62491	3.61142	3.6018		3.67372	3.77792	3.75996		3.75705	3.77571	3.77571		3.85659	3.85713	3.82403
1.78561	4.47769	4.17679	4.03393		3.94019	3.89464	3.89464		3.84332	3.77682	3.77682		3.72798	3.72798	3.71138		3.68915	3.67693	3.68087		3.70916	3.69173	3.65347		3.62626	3.61174	3.60236		3.67355	3.77927	3.75998		3.75654	3.77559	3.77559		3.85738	3.8565	3.82494
1.79281	4.47739	4.177	4.03334		3.94031	3.89454	3.89454		3.84338	3.77783	3.77783		3.72793	3.72793	3.71103		3.68833	3.67634	3.67917		3.70905	3.69126	3.65373		3.62754	3.61218	3.60339		3.67354	3.78032	3.76011		3.7561	3.77541	3.77541		3.85817	3.85614	3.82558
1.80001	4.47737	4.17711	4.03299		3.94041	3.89432	3.89432		3.84349	3.77902	3.77902		3.72799	3.72799	3.71066		3.68766	3.67588	3.67731		3.70924	3.69108	3.65426		3.62858	3.61273	3.60467		3.67372	3.78098	3.76021		3.75581	3.77519	3.77519		3.85892	3.85601	3.82588
1.80721	4.47755	4.17714	4.03293		3.9405	3.89401	3.89401		3.8435	3.78031	3.78031		3.72801	3.72801	3.7103		3.68725	3.67557	3.67554		3.70972	3.69116	3.6549		3.6292	3.61335	3.60602		3.67404	3.7812	3.76022		3.75575	3.77495	3.77495		3.85956	3.85604	3.82575
1.81441	4.47785	4.17714	4.03315		3.94057	3.89366	3.89366		3.84334	3.78158	3.78158		3.72785	3.72785	3.70998		3.68711	3.67541	3.67413		3.71038	3.69146	3.6555		3.62934	3.61398	3.6072		3.67442	3.78107	3.7601		3.75595	3.77464	3.77464		3.86006	3.85613	3.8252
1.82161	4.47815	4.17706	4.03356		3.94057	3.89329	3.89329		3.84302	3.78277	3.78277		3.72744	3.72744	3.7097		3.6872	3.67538	3.67328		3.7111	3.6919	3.65596		3.629	3.61449	3.60808		3.67473	3.78069	3.75988		3.75642	3.77427	3.77427		3.86034	3.85622	3.82431
1.82881	4.47836	4.17688	4.03402		3.94047	3.89287	3.89287		3.84256	3.78383	3.78383		3.72678	3.72678	3.70947		3.68745	3.6754	3.6731		3.71178	3.69242	3.65626		3.62831	3.61479	3.60861		3.67478	3.78022	3.7596		3.75709	3.77381	3.77381		3.86032	3.85624	3.82317
1.83601	4.47838	4.17656	4.03433		3.94028	3.89236	3.89236		3.84204	3.7847	3.7847		3.72595	3.72595	3.70926		3.6878	3.67541	3.67362		3.71237	3.69293	3.6564		3.62739	3.61485	3.60881		3.67444	3.77977	3.75932		3.75788	3.77333	3.77333		3.85998	3.85616	3.82195
1.84321	4.47821	4.17612	4.03439		3.93997	3.89177	3.89177		3.84154	3.78532	3.78532		3.72505	3.72505	3.70908		3.68819	3.67536	3.67482		3.71287	3.69338	3.65639		3.62641	3.61468	3.60879		3.67364	3.77945	3.75908		3.7587	3.77286	3.77286		3.85935	3.85601	3.82072
1.85041	4.47785	4.1756	4.03413		3.93953	3.89114	3.89114		3.84117	3.78568	3.78568		3.72419	3.72419	3.70892		3.68859	3.67522	3.67654		3.7133	3.69378	3.65629		3.6255	3.61434	3.6087		3.6724	3.77933	3.75897		3.75949	3.7724	3.7724		3.85851	3.85582	3.81961
1.85761	4.47732	4.17505	4.03356		3.93898	3.8905	3.8905		3.84096	3.78577	3.78577		3.72354	3.72354	3.70879		3.68899	3.67498	3.6786		3.71366	3.69419	3.65614		3.62484	3.61388	3.60863		3.67085	3.77938	3.75904		3.7602	3.77193	3.77193		3.85755	3.85566	3.81873
1.86481	4.47665	4.17451	4.03275		3.9384	3.88983	3.88983		3.84094	3.7856	3.7856		3.7232	3.7232	3.70871		3.68937	3.67465	3.68071		3.71396	3.69468	3.65597		3.62454	3.61335	3.60866		3.66912	3.77955	3.75935		3.76077	3.77148	3.77148		3.85653	3.85558	3.81815
1.87201	4.47589	4.17405	4.03184		3.93788	3.88911	3.88911		3.84108	3.7852	3.7852		3.72323	3.72323	3.70868		3.68973	3.67421	3.68261		3.71427	3.69524	3.6558		3.62467	3.61285	3.6088		3.66743	3.77977	3.75988		3.76118	3.77103	3.77103		3.85545	3.85563	3.8179
1.87921	4.4751	4.1737	4.03095		3.93745	3.88831	3.88831		3.84136	3.78461	3.78461		3.72357	3.72357	3.70873		3.69003	3.6737	3.68409		3.71463	3.69582	3.65561		3.62515	3.6124	3.609		3.66602	3.78	3.76058		3.76136	3.77061	3.77061		3.85435	3.85584	3.81793
1.88641	4.47435	4.17348	4.03026		3.93712	3.88744	3.88744		3.84173	3.78389	3.78389		3.72409	3.72409	3.70882		3.69028	3.67314	3.68508		3.71504	3.69632	3.6553		3.62586	3.61203	3.60911		3.66505	3.78017	3.7614		3.7613	3.77019	3.77019		3.85327	3.85618	3.8182
1.89361	4.4737	4.17334	4.02991		3.9368	3.88656	3.88656		3.84215	3.78311	3.78311		3.72463	3.72463	3.70894		3.69043	3.67264	3.68561		3.71544	3.69665	3.65482		3.62663	3.61167	3.60897		3.66461	3.78029	3.76227		3.76098	3.76975	3.76975		3.85228	3.85663	3.81867
1.90081	4.4732	4.17323	4.02994		3.93646	3.88573	3.88573		3.84257	3.78236	3.78236		3.72506	3.72506	3.70902		3.69049	3.67222	3.68574		3.71577	3.69669	3.65413		3.62728	3.61119	3.60847		3.66468	3.78036	3.76318		3.76041	3.76931	3.76931		3.85141	3.85718	3.81929
1.90801	4.47288	4.17309	4.03029		3.93606	3.885	3.885		3.84299	3.78172	3.78172		3.72527	3.72527	3.70901		3.69042	3.67194	3.68556		3.71599	3.69635	3.65329		3.62769	3.61046	3.60757		3.66516	3.78035	3.76405		3.75963	3.76893	3.76893		3.85068	3.8578	3.82004
1.91521	4.47279	4.17287	4.03083		3.93562	3.8844	3.8844		3.84337	3.78126	3.78126		3.72521	3.72521	3.70887		3.6902	3.67182	3.6852		3.71612	3.69559	3.65235		3.62775	3.60941	3.60634		3.66592	3.78026	3.76484		3.75871	3.76868	3.76868		3.8501	3.85845	3.82081
1.92241	4.47291	4.17254	4.03141		3.93515	3.88394	3.88394		3.84368	3.78101	3.78101		3.72488	3.72488	3.7086		3.68986	3.67187	3.68475		3.71621	3.69445	3.65136		3.62742	3.60807	3.60489		3.66685	3.78007	3.76551		3.75772	3.76858	3.76858		3.84974	3.85909	3.82153
1.92961	4.47325	4.17206	4.03192		3.93468	3.88364	3.88364		3.84387	3.78098	3.78098		3.72429	3.72429	3.7082		3.68938	3.67206	3.68429		3.71631	3.69312	3.65041		3.62673	3.60653	3.60343		3.66784	3.77973	3.76602		3.75674	3.7687	3.7687		3.84967	3.85969	3.82214
1.93681	4.47375	4.17144	4.0323		3.93423	3.88346	3.88346		3.84395	3.7812	3.7812		3.72352	3.72352	3.70772		3.6888	3.67242	3.68389		3.71647	3.69188	3.64951		3.62579	3.60491	3.60214		3.66879	3.77919	3.76635		3.7559	3.76903	3.76903		3.84985	3.86025	3.82259
1.94401	4.47435	4.17075	4.0325		3.93393	3.88341	3.88341		3.84392	3.78161	3.78161		3.72269	3.72269	3.70725		3.68813	3.67294	3.68358		3.71674	3.69099	3.64871		3.62478	3.60338	3.60121		3.66963	3.77842	3.76654		3.7553	3.76958	3.76958		3.85029	3.86075	3.82285
1.95121	4.47494	4.17005	4.03255		3.93382	3.88345	3.88345		3.84384	3.78213	3.78213		3.72195	3.72195	3.70688		3.68735	3.6736	3.68338		3.71713	3.69064	3.64801		3.62388	3.60212	3.60077		3.67029	3.77741	3.76658		3.75499	3.77026	3.77026		3.85088	3.86115	3.82286
1.95841	4.47536	4.16941	4.03249		3.934	3.88356	3.88356		3.84376	3.78264	3.78264		3.72141	3.72141	3.70671		3.68646	3.67437	3.68327		3.71763	3.69093	3.64743		3.62322	3.60125	3.60083		3.67079	3.77624	3.76654		3.75498	3.77101	3.77101		3.85156	3.86139	3.82261
1.96561	4.47546	4.16886	4.03245		3.93444	3.88371	3.88371		3.84372	3.78305	3.78305		3.72115	3.72115	3.70681		3.68547	3.67522	3.68325		3.71822	3.69185	3.64696		3.62292	3.60083	3.60132		3.67114	3.77498	3.76647		3.75524	3.7717	3.7717		3.85224	3.8614	3.82211
1.97281	4.47516	4.16842	4.0325		3.93508	3.88387	3.88387		3.84377	3.78335	3.78335		3.72122	3.72122	3.70716		3.68447	3.67614	3.6833		3.71884	3.69327	3.64658		3.62297	3.60085	3.60212		3.67135	3.77374	3.76642		3.75569	3.77225	3.77225		3.85286	3.86116	3.8214
1.98001	4.47446	4.16812	4.0327		3.93586	3.88407	3.88407		3.84393	3.78352	3.78352		3.72165	3.72165	3.70773		3.68353	3.67712	3.68342		3.71944	3.695	3.64631		3.62331	3.6012	3.60308		3.67144	3.77265	3.76642		3.75624	3.7726	3.7726		3.85338	3.86073	3.82052
1.98721	4.47338	4.168	4.03303		3.93664	3.88429	3.88429		3.84423	3.78361	3.78361		3.7224	3.7224	3.70842		3.68276	3.67811	3.68357		3.71999	3.69674	3.64621		3.62384	3.60179	3.6041		3.67141	3.77182	3.76652		3.75677	3.77269	3.77269		3.85382	3.86019	3.81953
1.99441	4.472	4.16807	4.03342		3.93735	3.88449	3.88449		3.84465	3.78363	3.78363		3.72343	3.72343	3.7091		3.68221	3.67902	3.68372		3.72046	3.6982	3.6463		3.62443	3.60252	3.60504		3.67131	3.77136	3.76675		3.75721	3.77253	3.77253		3.85418	3.85957	3.81848
2.00161	4.47047	4.16826	4.03374		3.93792	3.88465	3.88465		3.84517	3.78364	3.78364		3.72462	3.72462	3.70968		3.68192	3.67975	3.6838		3.72092	3.69916	3.64659		3.62492	3.60337	3.60586		3.67119	3.77127	3.76708		3.75752	3.77212	3.77212		3.85445	3.85894	3.81746
2.00881	4.469	4.16849	4.03392		3.93831	3.88472	3.88472		3.84571	3.78367	3.78367		3.72583	3.72583	3.71006		3.68192	3.68019	3.68379		3.72135	3.69953	3.64708		3.62519	3.60432	3.60649		3.67112	3.77148	3.76745		3.75772	3.77152	3.77152		3.85463	3.85835	3.81656
2.01601	4.46774	4.16867	4.03387		3.93848	3.88469	3.88469		3.84623	3.78374	3.78374		3.72697	3.72697	3.7102		3.68218	3.68032	3.68367		3.72176	3.69934	3.6477		3.62515	3.60538	3.60692		3.67118	3.77188	3.76778		3.7578	3.7708	3.7708		3.85473	3.8579	3.81585
2.02321	4.46685	4.16874	4.03357		3.93844	3.88459	3.88459		3.84669	3.78382	3.78382		3.72796	3.72796	3.71009		3.68267	3.68013	3.6835		3.72209	3.69872	3.64844		3.6248	3.60656	3.60714		3.67138	3.77237	3.76794		3.75785	3.77003	3.77003		3.8548	3.85764	3.81538
2.03041	4.46634	4.16868	4.03303		3.93823	3.88448	3.88448		3.84709	3.78385	3.78385		3.72876	3.72876	3.70981		3.68326	3.67964	3.68333		3.72221	3.69781	3.64923		3.62417	3.60781	3.60715		3.67172	3.77284	3.76788		3.75791	3.7693	3.7693		3.85486	3.85759	3.81516
2.03761	4.46616	4.16846	4.03231		3.93797	3.88441	3.88441		3.84738	3.78382	3.78382		3.72934	3.72934	3.70947		3.68385	3.67888	3.68322		3.72202	3.69676	3.65003		3.62327	3.60907	3.60689		3.67213	3.77321	3.76751		3.75798	3.76867	3.76867		3.85491	3.85766	3.81518
2.04481	4.46628	4.1681	4.0315		3.93773	3.88443	3.88443		3.84759	3.78368	3.78368		3.7297	3.7297	3.70914		3.68434	3.67793	3.68319		3.72138	3.69572	3.65078		3.62219	3.61019	3.60631		3.67256	3.77337	3.76682		3.7581	3.76821	3.76821		3.85492	3.85778	3.81542
2.05201	4.46661	4.16766	4.03069		3.93758	3.88458	3.88458		3.84771	3.78349	3.78349		3.72987	3.72987	3.70885		3.68471	3.67689	3.68326		3.72026	3.69479	3.65143		3.62101	3.611	3.60538		3.67296	3.77329	3.76582		3.75826	3.76791	3.76791		3.85486	3.85789	3.81582
2.05921	4.46705	4.16722	4.03		3.93751	3.88491	3.88491		3.84781	3.78322	3.78322		3.7299	3.7299	3.70852		3.68495	3.67588	3.68338		3.71867	3.69404	3.65196		3.61982	3.61142	3.60418		3.67326	3.77297	3.76456		3.75849	3.76775	3.76775		3.85476	3.85792	3.81632
2.06641	4.46752	4.16685	4.02951		3.93748	3.88541	3.88541		3.8479	3.78292	3.78292		3.72988	3.72988	3.70812		3.68508	3.675	3.68351		3.71673	3.69346	3.65236		3.61876	3.61136	3.60282		3.67347	3.77243	3.76316		3.7588	3.76766	3.76766		3.85465	3.85786	3.8168
2.07361	4.46793	4.16662	4.02927		3.93741	3.88604	3.88604		3.84794	3.78262	3.78262		3.72979	3.72979	3.70759		3.68515	3.67423	3.68356		3.71459	3.69297	3.65255		3.61791	3.61086	3.60147		3.67357	3.77175	3.76171		3.75916	3.76757	3.76757		3.85453	3.85767	3.81712
2.08081	4.46824	4.16653	4.02923		3.93723	3.88669	3.88669		3.84793	3.78236	3.78236		3.72963	3.72963	3.70688		3.68525	3.67356	3.68342		3.71246	3.6925	3.65251		3.61731	3.61	3.60026		3.67356	3.77098	3.76035		3.75957	3.76745	3.76745		3.85435	3.85736	3.81718
2.08801	4.46844	4.16658	4.02934		3.93692	3.88722	3.88722		3.84788	3.78214	3.78214		3.72937	3.72937	3.70595		3.68548	3.67295	3.68302		3.71054	3.69196	3.6522		3.61699	3.60892	3.5993		3.67349	3.77026	3.75915		3.76002	3.7673	3.7673		3.85409	3.85697	3.81694
2.09521	4.46854	4.16671	4.02948		3.9364	3.88753	3.88753		3.84781	3.7819	3.7819		3.72904	3.72904	3.7048		3.68585	3.67242	3.68232		3.70898	3.69135	3.65164		3.61698	3.60782	3.59871		3.6734	3.76964	3.75816		3.76052	3.7671	3.7671		3.85381	3.8566	3.81644
2.10241	4.46857	4.16689	4.0295		3.93562	3.88754	3.88754		3.84771	3.78159	3.78159		3.72868	3.72868	3.70351		3.68633	3.67199	3.68136		3.70787	3.69067	3.65088		3.61727	3.60687	3.59851		3.67335	3.76922	3.75741		3.76105	3.7669	3.7669		3.85356	3.85635	3.81568
2.10961	4.46857	4.16703	4.02928		3.93459	3.88721	3.88721		3.84753	3.78119	3.78119		3.72832	3.72832	3.70217		3.68687	3.67169	3.68024		3.70719	3.68992	3.64996		3.61782	3.60621	3.59866		3.67333	3.7691	3.75687		3.76156	3.76674	3.76674		3.85338	3.85633	3.81474
2.11681	4.46857	4.16715	4.02873		3.93339	3.88656	3.88656		3.84722	3.7807	3.7807		3.72795	3.72795	3.70089		3.6874	3.67159	3.67905		3.70685	3.68915	3.64893		3.61854	3.60591	3.59905		3.6733	3.76934	3.75652		3.76201	3.76667	3.76667		3.85326	3.85662	3.81371
2.12401	4.46862	4.16721	4.02782		3.93217	3.88565	3.88565		3.84677	3.78016	3.78016		3.72756	3.72756	3.69977		3.68787	3.67171	3.6779		3.70673	3.68837	3.64789		3.61933	3.60593	3.59949		3.67321	3.76997	3.75631		3.76238	3.7667	3.7667		3.85317	3.85724	3.81271
2.13121	4.46879	4.16722	4.02658		3.93109	3.88463	3.88463		3.84618	3.7796	3.7796		3.72721	3.72721	3.69887		3.68822	3.67208	3.6769		3.70665	3.68766	3.64699		3.62009	3.6062	3.59982		3.67308	3.77094	3.75627		3.76267	3.76685	3.76685		3.85306	3.85812	3.81182
2.13841	4.4691	4.16722	4.02509		3.93026	3.88364	3.88364		3.84546	3.77907	3.77907		3.72697	3.72697	3.69826		3.68837	3.67269	3.6761		3.70653	3.68705	3.64632		3.62081	3.60664	3.59998		3.6729	3.77209	3.75642		3.76289	3.76704	3.76704		3.85294	3.85911	3.81117
2.14561	4.46954	4.16725	4.02348		3.92975	3.88282	3.88282		3.84458	3.77862	3.77862		3.72686	3.72686	3.69793		3.68828	3.67348	3.67555		3.70633	3.68658	3.64595		3.62144	3.60718	3.59992		3.67272	3.77325	3.7568		3.76307	3.76726	3.76726		3.85277	3.86006	3.81078
2.15281	4.47006	4.16736	4.02193		3.9296	3.88225	3.88225		3.84352	3.77831	3.77831		3.72685	3.72685	3.69785		3.68798	3.67435	3.67523		3.7061	3.68629	3.64587		3.62197	3.60772	3.5997		3.67253	3.77425	3.75745		3.76323	3.76748	3.76748		3.85253	3.86077	3.81062
2.16001	4.47058	4.16758	4.0206		3.92984	3.88195	3.88195		3.84235	3.77818	3.77818		3.72688	3.72688	3.69796		3.68758	3.67515	3.67514		3.70591	3.68615	3.64603		3.62237	3.60817	3.59936		3.67234	3.77496	3.7584		3.7634	3.76766	3.76766		3.85217	3.86109	3.81063
2.16721	4.47101	4.1679	4.0196		3.9304	3.88193	3.88193		3.84123	3.77825	3.77825		3.72685	3.72685	3.69822		3.68717	3.67567	3.67519		3.70585	3.68617	3.64643		3.62267	3.60844	3.59902		3.67216	3.77535	3.75962		3.76359	3.76779	3.76779		3.85169	3.86089	3.81076
2.17441	4.4713	4.16826	4.01896		3.93117	3.88213	3.88213		3.84025	3.77846	3.77846		3.72677	3.72677	3.69858		3.68681	3.67576	3.67537		3.70597	3.6863	3.64701		3.62293	3.60848	3.59878		3.672	3.77537	3.7611		3.76375	3.76785	3.76785		3.85113	3.86016	3.811
2.18161	4.47142	4.16862	4.01863		3.932	3.88252	3.88252		3.8395	3.77876	3.77876		3.72663	3.72663	3.69897		3.68655	3.67533	3.67562		3.70631	3.68649	3.64771		3.62314	3.60835	3.59874		3.67187	3.77504	3.76276		3.76387	3.76786	3.76786		3.85058	3.85895	3.8113
2.18881	4.47132	4.16894	4.01856		3.93273	3.883	3.883		3.83899	3.7791	3.7791		3.7264	3.7264	3.69938		3.68643	3.67441	3.67597		3.70691	3.68667	3.64848		3.62331	3.60813	3.59899		3.67174	3.77439	3.76448		3.76388	3.76784	3.76784		3.85011	3.85745	3.81165
2.19601	4.47103	4.16915	4.01868		3.93326	3.88355	3.88355		3.83868	3.7794	3.7794		3.72611	3.72611	3.69973		3.68643	3.67313	3.67637		3.70775	3.68676	3.64924		3.62335	3.60788	3.59957		3.67161	3.77353	3.76606		3.76375	3.76783	3.76783		3.84977	3.85587	3.81201
2.20321	4.47057	4.16913	4.01887		3.93352	3.88415	3.88415		3.83857	3.77958	3.77958		3.72579	3.72579	3.69999		3.68649	3.67165	3.67682		3.7087	3.68671	3.64997		3.62321	3.60766	3.60046		3.6715	3.77259	3.76733		3.76342	3.76784	3.76784		3.84958	3.85448	3.81234
2.21041	4.46998	4.16879	4.01911		3.93351	3.88481	3.88481		3.83864	3.77957	3.77957		3.72552	3.72552	3.70016		3.68649	3.67013	3.67727		3.70961	3.68648	3.6507		3.62279	3.60749	3.60158		3.67149	3.77168	3.76815		3.76287	3.76793	3.76793		3.84951	3.85346	3.81263
2.21761	4.46935	4.16809	4.01928		3.93326	3.88554	3.88554		3.83875	3.77932	3.77932		3.7254	3.7254	3.70027		3.6863	3.66874	3.6777		3.71035	3.68602	3.65138		3.62208	3.60743	3.60282		3.67163	3.77087	3.76845		3.76207	3.76813	3.76813		3.84959	3.85291	3.81284
2.22481	4.46872	4.16707	4.01937		3.93283	3.88631	3.88631		3.83875	3.77884	3.77884		3.7255	3.7255	3.70035		3.68584	3.66768	3.67804		3.71084	3.68537	3.65199		3.62108	3.60755	3.60409		3.67197	3.77016	3.76821		3.76108	3.76852	3.76852		3.84981	3.85284	3.81295
2.23201	4.4681	4.16581	4.01937		3.93233	3.88705	3.88705		3.83855	3.77821	3.77821		3.7258	3.7258	3.7004		3.68512	3.66707	3.67829		3.71105	3.68455	3.65245		3.61981	3.60785	3.60531		3.67252	3.76955	3.76743		3.75993	3.76917	3.76917		3.85015	3.8532	3.81297
2.23921	4.46751	4.16442	4.01931		3.93183	3.88766	3.88766		3.83811	3.77753	3.77753		3.72625	3.72625	3.70041		3.68421	3.66699	3.6784		3.71098	3.68363	3.65266		3.6184	3.60824	3.60641		3.67325	3.76905	3.7662		3.75876	3.77011	3.77011		3.85058	3.85385	3.81293
2.24641	4.46693	4.163	4.01922		3.93144	3.88805	3.88805		3.83748	3.77691	3.77691		3.72673	3.72673	3.70032		3.68323	3.66739	3.67837		3.71065	3.6827	3.65255		3.61703	3.60859	3.60734		3.67416	3.76869	3.76463		3.75767	3.77132	3.77132		3.85108	3.85461	3.81288
2.25361	4.46641	4.16171	4.01909		3.93122	3.88815	3.88815		3.83676	3.77641	3.77641		3.72714	3.72714	3.70008		3.68235	3.66818	3.67821		3.71012	3.68187	3.6521		3.61593	3.60879	3.608		3.67523	3.76848	3.76289		3.75677	3.77274	3.77274		3.85165	3.85533	3.81294
2.26081	4.46595	4.16074	4.01895		3.93111	3.88795	3.88795		3.83601	3.77606	3.77606		3.72736	3.72736	3.69965		3.6817	3.66923	3.67796		3.70953	3.68122	3.65129		3.61528	3.6088	3.60836		3.6764	3.76843	3.76117		3.75612	3.77429	3.77429		3.85233	3.85585	3.81325
2.26801	4.46553	4.1602	4.01881		3.93108	3.88744	3.88744		3.83534	3.77584	3.77584		3.72733	3.72733	3.69901		3.6814	3.67039	3.67766		3.70901	3.68083	3.65017		3.61519	3.60864	3.60846		3.67754	3.76853	3.75956		3.75571	3.77579	3.77579		3.85309	3.85609	3.81393
2.27521	4.46512	4.16011	4.01868		3.93105	3.88669	3.88669		3.83481	3.7757	3.7757		3.72699	3.72699	3.69812		3.68149	3.67157	3.67739		3.70862	3.68072	3.64879		3.61566	3.60834	3.60832		3.67851	3.76879	3.75814		3.75549	3.7771	3.7771		3.85395	3.85609	3.81507
2.28241	4.46468	4.16038	4.01855		3.931	3.88577	3.88577		3.83449	3.77554	3.77554		3.72634	3.72634	3.69703		3.68189	3.67267	3.67715		3.70842	3.68091	3.64729		3.6166	3.60794	3.608		3.67921	3.76923	3.75699		3.75541	3.77811	3.77811		3.85485	3.85596	3.81667
2.28961	4.46418	4.16083	4.01839		3.93095	3.88479	3.88479		3.8344	3.7752	3.7752		3.72544	3.72544	3.69582		3.68248	3.67361	3.67698		3.70837	3.68136	3.64577		3.61785	3.6075	3.60746		3.67959	3.76983	3.75616		3.75538	3.77871	3.77871		3.8558	3.8558	3.81863
2.29681	4.46361	4.16127	4.01823		3.93091	3.88381	3.88381		3.83451	3.77459	3.77459		3.72438	3.72438	3.69471		3.68305	3.67429	3.67687		3.70842	3.68201	3.6444		3.61919	3.60711	3.60674		3.67962	3.77057	3.7557		3.7553	3.77883	3.77883		3.8568	3.85569	3.82078
2.30401	4.46299	4.16156	4.01805		3.9309	3.88293	3.88293		3.83475	3.7737	3.7737		3.72325	3.72325	3.6939		3.68345	3.67467	3.67681		3.7085	3.68275	3.64329		3.62042	3.60689	3.60585		3.67931	3.77134	3.75564		3.75506	3.77849	3.77849		3.85787	3.85568	3.8229
2.31121	4.46233	4.16159	4.01784		3.93092	3.88219	3.88219		3.83503	3.77262	3.77262		3.72214	3.72214	3.69353		3.68359	3.67475	3.67679		3.70851	3.68343	3.64253		3.62141	3.60687	3.60489		3.67863	3.77205	3.75593		3.75463	3.77776	3.77776		3.85898	3.85574	3.82475
2.31841	4.46168	4.16131	4.01757		3.93101	3.88168	3.88168		3.83533	3.77147	3.77147		3.72116	3.72116	3.69368		3.68345	3.67458	3.67679		3.70834	3.68393	3.64214		3.62206	3.60702	3.60397		3.67765	3.77261	3.75658		3.75404	3.7768	3.7768		3.86012	3.85586	3.82611
2.32561	4.4611	4.16072	4.01726		3.93121	3.88145	3.88145		3.83562	3.77038	3.77038		3.72037	3.72037	3.6943		3.68307	3.67419	3.6768		3.70798	3.68415	3.64207		3.62235	3.60724	3.60315		3.67648	3.77294	3.75752		3.75342	3.77577	3.77577		3.86127	3.85597	3.82681
2.33281	4.46066	4.15993	4.01695		3.93152	3.88155	3.88155		3.83593	3.76949	3.76949		3.71982	3.71982	3.69532		3.68249	3.67362	3.67683		3.70742	3.68404	3.64226		3.62237	3.6074	3.60248		3.67523	3.77302	3.75873		3.75289	3.77482	3.77482		3.86239	3.85594	3.82677
2.34001	4.46041	4.15912	4.01669		3.93189	3.88204	3.88204		3.83626	3.76893	3.76893		3.71952	3.71952	3.69658		3.68179	3.67295	3.67686		3.70674	3.68363	3.64259		3.6222	3.60743	3.60198		3.67406	3.77286	3.76015		3.75255	3.77407	3.77407		3.86344	3.85565	3.82605
2.34722	4.46039	4.15845	4.01648		3.93219	3.88291	3.88291		3.83655	3.76881	3.76881		3.71944	3.71944	3.69791		3.68102	3.67226	3.67687		3.70603	3.68301	3.64298		3.622	3.60731	3.60169		3.67303	3.77253	3.76165		3.75239	3.77357	3.77357		3.8643	3.85506	3.8248
2.35442	4.4606	4.15807	4.01632		3.93241	3.88414	3.88414		3.83677	3.76922	3.76922		3.71956	3.71956	3.69909		3.68025	3.67166	3.67683		3.70539	3.68229	3.64332		3.62182	3.60705	3.6016		3.67215	3.77213	3.76313		3.75242	3.77333	3.77333		3.86487	3.85424	3.82319
2.36162	4.46097	4.15803	4.01621		3.93255	3.88561	3.88561		3.83687	3.7701	3.7701		3.71988	3.71988	3.69999		3.67947	3.6712	3.67669		3.70491	3.68156	3.64354		3.62173	3.60667	3.60171		3.67143	3.77175	3.76449		3.75259	3.77328	3.77328		3.86501	3.85328	3.82143
2.36882	4.46141	4.15825	4.01613		3.93268	3.88712	3.88712		3.8368	3.77133	3.77133		3.72031	3.72031	3.70055		3.67863	3.67091	3.67646		3.70466	3.68095	3.64362		3.6217	3.60618	3.6019		3.67088	3.77148	3.76564		3.75285	3.77333	3.77333		3.86468	3.85226	3.81972
2.37602	4.46183	4.15864	4.01605		3.93285	3.88847	3.88847		3.83653	3.77275	3.77275		3.72072	3.72072	3.70082		3.67768	3.67072	3.67612		3.70467	3.68048	3.64361		3.6217	3.60564	3.60211		3.67053	3.7714	3.76654		3.75313	3.77334	3.77334		3.86387	3.85125	3.81821
2.38322	4.46212	4.15909	4.01591		3.93307	3.88943	3.88943		3.83603	3.77421	3.77421		3.72096	3.72096	3.70087		3.67667	3.67054	3.67573		3.70494	3.68021	3.64361		3.62169	3.60515	3.60226		3.67039	3.77157	3.7671		3.75341	3.77321	3.77321		3.86258	3.85029	3.81699
2.39042	4.46222	4.15947	4.01564		3.93335	3.88986	3.88986		3.8353	3.77553	3.77553		3.72093	3.72093	3.70077		3.67565	3.6703	3.67534		3.70538	3.68013	3.6437		3.62168	3.6048	3.60233		3.67044	3.77197	3.76726		3.75364	3.77288	3.77288		3.8609	3.84946	3.81608
2.39762	4.46211	4.15968	4.0152		3.93369	3.88972	3.88972		3.83443	3.77656	3.77656		3.72061	3.72061	3.70063		3.6747	3.66992	3.67504		3.70589	3.68021	3.64397		3.62165	3.60458	3.60236		3.67067	3.77256	3.767		3.75388	3.77235	3.77235		3.85898	3.84879	3.81545
2.40482	4.46175	4.15968	4.0146		3.93411	3.889	3.889		3.83352	3.77712	3.77712		3.72002	3.72002	3.70054		3.67398	3.66938	3.67491		3.70641	3.6804	3.64443		3.62157	3.60448	3.60242		3.67111	3.77323	3.76631		3.7542	3.77166	3.77166		3.85697	3.84827	3.81502
2.41202	4.46119	4.15944	4.01391		3.93459	3.88784	3.88784		3.8327	3.77712	3.77712		3.71924	3.71924	3.70055		3.67352	3.66865	3.67507		3.70688	3.68062	3.6451		3.62144	3.60442	3.60256		3.67181	3.7739	3.76528		3.75468	3.77092	3.77092		3.85511	3.8478	3.81472
2.41922	4.4605	4.15904	4.01319		3.93506	3.88641	3.88641		3.83205	3.77659	3.77659		3.71834	3.71834	3.70066		3.67342	3.66781	3.67553		3.70724	3.68087	3.6459		3.62121	3.6044	3.60284		3.67277	3.77454	3.764		3.75535	3.77025	3.77025		3.85354	3.8473	3.81449
2.42642	4.45979	4.15859	4.01253		3.93547	3.88491	3.88491		3.83158	3.77563	3.77563		3.71744	3.71744	3.70079		3.6737	3.66699	3.67628		3.70746	3.68116	3.64671		3.6209	3.60446	3.60327		3.6739	3.77511	3.7626		3.75618	3.76972	3.76972		3.85236	3.84677	3.81429
2.43362	4.45914	4.15816	4.01197		3.93577	3.8835	3.8835		3.8313	3.77442	3.77442		3.71667	3.71667	3.70089		3.67435	3.66634	3.67723		3.70751	3.68147	3.64742		3.62051	3.60464	3.60382		3.67507	3.77561	3.7612		3.75708	3.76937	3.76937		3.85157	3.84625	3.8141
2.44082	4.45863	4.15785	4.0116		3.93596	3.88229	3.88229		3.83117	3.77315	3.77315		3.7161	3.7161	3.7009		3.67534	3.66599	3.67826		3.70739	3.68179	3.64788		3.62002	3.60492	3.60443		3.67616	3.776	3.75997		3.75792	3.76921	3.76921		3.85118	3.84578	3.81393
2.44802	4.45833	4.1577	4.01146		3.93606	3.88131	3.88131		3.83112	3.77198	3.77198		3.71577	3.71577	3.70077		3.67657	3.66598	3.67925		3.7071	3.68204	3.64804		3.61945	3.60524	3.60498		3.67709	3.77625	3.75902		3.75862	3.76916	3.76916		3.8511	3.84541	3.81379
2.45522	4.45825	4.15767	4.01158		3.93607	3.88049	3.88049		3.83106	3.77105	3.77105		3.71562	3.71562	3.70048		3.67796	3.66629	3.6801		3.7067	3.68216	3.64789		3.61883	3.60553	3.60536		3.67776	3.77637	3.75846		3.75909	3.76918	3.76918		3.85118	3.84517	3.81368
2.46242	4.45838	4.15772	4.01193		3.93602	3.87974	3.87974		3.83092	3.77046	3.77046		3.71553	3.71553	3.70001		3.67941	3.66684	3.68074		3.70625	3.6821	3.64748		3.6182	3.60574	3.60546		3.67811	3.77637	3.7583		3.75931	3.76917	3.76917		3.85123	3.84508	3.81359
2.46962	4.45864	4.15777	4.01244		3.93589	3.87895	3.87895		3.83065	3.77022	3.77022		3.71539	3.71539	3.69939		3.68084	3.66752	3.68111		3.70578	3.68183	3.64689		3.61766	3.60585	3.60524		3.67813	3.77623	3.75848		3.75932	3.76914	3.76914		3.85115	3.84514	3.81351
2.47682	4.45896	4.15779	4.01301		3.93564	3.87805	3.87805		3.8303	3.7703	3.7703		3.71515	3.71515	3.69869		3.68216	3.66821	3.68124		3.70536	3.68134	3.64627		3.61724	3.60581	3.6047		3.67789	3.77594	3.75891		3.75916	3.76911	3.76911		3.85086	3.84534	3.8134
2.48402	4.45929	4.15772	4.0136		3.93526	3.877	3.877		3.82988	3.7706	3.7706		3.71478	3.71478	3.69807		3.68327	3.66877	3.68117		3.70504	3.68067	3.64577		3.61702	3.60555	3.60391		3.67746	3.77547	3.75949		3.75888	3.76909	3.76909		3.85041	3.84567	3.81328
2.49122	4.45955	4.15758	4.01415		3.93478	3.87585	3.87585		3.82944	3.77105	3.77105		3.7143	3.7143	3.6976		3.68406	3.66909	3.68098		3.70486	3.67987	3.64548		3.61699	3.60504	3.60292		3.67692	3.77482	3.76011		3.75859	3.76909	3.76909		3.84987	3.84609	3.81315
2.49842	4.45974	4.15735	4.01464		3.93422	3.8747	3.8747		3.82904	3.77159	3.77159		3.71375	3.71375	3.69737		3.68443	3.66912	3.68071		3.70485	3.67903	3.64546		3.61709	3.6043	3.60187		3.67633	3.77406	3.76065		3.75835	3.76914	3.76914		3.84933	3.84656	3.81302
2.50562	4.45982	4.15701	4.01505		3.93366	3.87369	3.87369		3.82878	3.77221	3.77221		3.71321	3.71321	3.69742		3.68437	3.66889	3.68037		3.70499	3.67824	3.64566		3.61727	3.60345	3.60086		3.67576	3.77324	3.76103		3.75816	3.76922	3.76922		3.84892	3.84709	3.81293
2.51282	4.45975	4.15659	4.01536		3.93311	3.873	3.873		3.82876	3.77288	3.77288		3.71277	3.71277	3.69775		3.68389	3.66843	3.67997		3.70529	3.67761	3.64602		3.61746	3.6026	3.59997		3.67525	3.77243	3.76117		3.75798	3.76938	3.76938		3.8488	3.84771	3.8129
2.52002	4.45954	4.15614	4.01558		3.93258	3.87275	3.87275		3.82901	3.77356	3.77356		3.71249	3.71249	3.69831		3.68306	3.66784	3.67947		3.70569	3.67723	3.64643		3.6176	3.60182	3.59927		3.67486	3.77169	3.76104		3.75774	3.7696	3.7696		3.84909	3.84848	3.81297
2.52722	4.45913	4.15569	4.01579		3.93212	3.873	3.873		3.82953	3.7742	3.7742		3.71242	3.71242	3.69897		3.68196	3.66719	3.67888		3.70615	3.67712	3.6468		3.61763	3.60112	3.59877		3.67458	3.77108	3.76071		3.75739	3.76983	3.76983		3.84985	3.84942	3.81319
2.53442	4.45853	4.15527	4.01602		3.93175	3.87376	3.87376		3.83032	3.77471	3.77471		3.71257	3.71257	3.6996		3.68069	3.66657	3.67824		3.70666	3.67728	3.64706		3.61757	3.60048	3.59845		3.67442	3.77064	3.76025		3.75694	3.76998	3.76998		3.85097	3.85053	3.81358
2.54162	4.45773	4.15487	4.01631		3.93147	3.87491	3.87491		3.83132	3.77503	3.77503		3.71292	3.71292	3.70009		3.67942	3.66606	3.67765		3.70722	3.67765	3.64714		3.61741	3.59989	3.59831		3.67435	3.77043	3.75976		3.75638	3.76998	3.76998		3.85228	3.85177	3.8141
2.54882	4.45673	4.1545	4.01665		3.93125	3.87629	3.87629		3.8325	3.77512	3.77512		3.7134	3.7134	3.70033		3.67828	3.6657	3.67723		3.70782	3.67815	3.64702		3.61726	3.59937	3.59835		3.67437	3.77045	3.75933		3.75574	3.76983	3.76983		3.85358	3.85307	3.8147
2.55602	4.4556	4.15419	4.017		3.93102	3.8777	3.8777		3.83375	3.77492	3.77492		3.71393	3.71393	3.70029		3.67732	3.66548	3.67708		3.70843	3.67864	3.6468		3.61715	3.59897	3.59857		3.67447	3.77065	3.75905		3.75504	3.76953	3.76953		3.85469	3.85437	3.81534
2.56322	4.4544	4.15397	4.01732		3.93071	3.87894	3.87894		3.83489	3.77446	3.77446		3.71445	3.71445	3.69995		3.67655	3.66537	3.67727		3.70902	3.67907	3.64658		3.61717	3.59874	3.59892		3.67457	3.77097	3.75898		3.75438	3.76908	3.76908		3.85548	3.85553	3.81601
2.57042	4.45324	4.15387	4.01761		3.93032	3.87986	3.87986		3.83576	3.77377	3.77377		3.71488	3.71488	3.69934		3.67591	3.66533	3.6778		3.70951	3.67935	3.64647		3.61732	3.59871	3.59934		3.67461	3.77132	3.75916		3.75385	3.76843	3.76843		3.85585	3.85641	3.8167
2.57762	4.45223	4.15391	4.01781		3.92987	3.88038	3.88038		3.83626	3.77297	3.77297		3.71519	3.71519	3.69855		3.67538	3.66529	3.67863		3.70981	3.67941	3.64652		3.61762	3.59893	3.59978		3.6745	3.7716	3.75959		3.75351	3.76762	3.76762		3.85574	3.85689	3.81737
2.58482	4.45149	4.15405	4.01787		3.92935	3.88047	3.88047		3.83635	3.7722	3.7722		3.71534	3.71534	3.69767		3.6749	3.6652	3.67963		3.70982	3.6792	3.64673		3.61806	3.59942	3.6002		3.67424	3.77173	3.76018		3.75336	3.7667	3.7667		3.8552	3.85697	3.81796
2.59202	4.45104	4.15427	4.01776		3.92879	3.88017	3.88017		3.83604	3.7716	3.7716		3.71531	3.71531	3.69676		3.67445	3.665	3.68062		3.7095	3.67875	3.647		3.61861	3.60022	3.60058		3.67386	3.7717	3.76081		3.75338	3.7658	3.7658		3.85435	3.85668	3.81845
2.59922	4.45088	4.15452	4.01747		3.92818	3.87962	3.87962		3.83534	3.77128	3.77128		3.71515	3.71515	3.69586		3.67402	3.66468	3.68139		3.70882	3.67811	3.64726		3.61923	3.60127	3.6009		3.67341	3.77152	3.76138		3.75351	3.76505	3.76505		3.85335	3.85614	3.81887
2.60642	4.45091	4.15474	4.01708		3.92755	3.87893	3.87893		3.83432	3.77129	3.77129		3.71493	3.71493	3.69499		3.67362	3.66432	3.68174		3.70782	3.67741	3.64742		3.61984	3.60243	3.60114		3.67292	3.77126	3.76184		3.75378	3.76455	3.76455		3.85236	3.85547	3.81926
2.61362	4.45104	4.15486	4.01663		3.92693	3.87822	3.87822		3.83309	3.77163	3.77163		3.71476	3.71476	3.69416		3.67333	3.66403	3.6816		3.70659	3.67674	3.64738		3.62037	3.6035	3.60128		3.67246	3.77101	3.76218		3.75413	3.76435	3.76435		3.85144	3.85478	3.81964
2.62082	4.45117	4.15481	4.01615		3.92634	3.87762	3.87762		3.8318	3.77229	3.77229		3.71479	3.71479	3.69343		3.67323	3.66393	3.68096		3.70529	3.67616	3.64707		3.62073	3.60427	3.60132		3.6721	3.77084	3.7624		3.75454	3.76447	3.76447		3.85061	3.85412	3.81996
2.62802	4.45128	4.15457	4.01562		3.92581	3.87717	3.87717		3.83059	3.7732	3.7732		3.71512	3.71512	3.69282		3.67335	3.66411	3.67992		3.70411	3.67572	3.64647		3.6209	3.60464	3.60127		3.67192	3.77077	3.76253		3.75494	3.76493	3.76493		3.84989	3.85356	3.82019
2.63522	4.45134	4.15416	4.01508		3.92537	3.8769	3.8769		3.82957	3.77426	3.77426		3.71577	3.71577	3.69233		3.6737	3.66461	3.6786		3.70326	3.67545	3.64564		3.62089	3.60463	3.60116		3.67193	3.77083	3.76258		3.75529	3.76569	3.76569		3.84926	3.8531	3.82027
2.64242	4.45137	4.15367	4.01455		3.92507	3.87679	3.87679		3.82881	3.77532	3.77532		3.71675	3.71675	3.69195		3.67422	3.66539	3.67711		3.70286	3.67541	3.64471		3.62067	3.6043	3.601		3.67211	3.77103	3.76256		3.75556	3.76663	3.76663		3.84871	3.85271	3.82017
2.64962	4.45141	4.15318	4.01402		3.925	3.87678	3.87678		3.82834	3.77626	3.77626		3.71802	3.71802	3.69171		3.67488	3.66639	3.67561		3.703	3.67559	3.64385		3.62024	3.60376	3.60078		3.67235	3.7713	3.76247		3.7558	3.76761	3.76761		3.84825	3.85234	3.81985
2.65682	4.45151	4.15277	4.01347		3.9252	3.87677	3.87677		3.82816	3.77699	3.77699		3.71946	3.71946	3.6916		3.6756	3.66747	3.67424		3.70362	3.67594	3.64317		3.61963	3.60315	3.60053		3.67259	3.77153	3.76233		3.75602	3.76852	3.76852		3.84793	3.85185	3.81925
2.66402	4.45173	4.15251	4.01289		3.9257	3.87671	3.87671		3.8282	3.77742	3.77742		3.72091	3.72091	3.69166		3.67631	3.66849	3.67316		3.7046	3.67638	3.64278		3.61895	3.60263	3.60028		3.67277	3.7716	3.76214		3.75623	3.76928	3.76928		3.84778	3.85121	3.81837
2.67122	4.45207	4.15242	4.01233		3.92647	3.87653	3.87653		3.8284	3.77758	3.77758		3.72218	3.72218	3.69187		3.67691	3.66931	3.67245		3.70574	3.67688	3.6427		3.61832	3.60234	3.6001		3.67287	3.77143	3.76189		3.75644	3.76986	3.76986		3.84786	3.85042	3.81727
2.67842	4.45247	4.15251	4.01189		3.92745	3.87618	3.87618		3.82867	3.77746	3.77746		3.7231	3.7231	3.69219		3.67736	3.66982	3.67218		3.70679	3.67736	3.64292		3.61786	3.60242	3.60008		3.67286	3.77098	3.76158		3.75668	3.77024	3.77024		3.84821	3.8496	3.81606
2.68562	4.45282	4.15273	4.0116		3.92859	3.87561	3.87561		3.82892	3.77706	3.77706		3.72356	3.72356	3.69259		3.67767	3.66997	3.67236		3.70755	3.67777	3.64341		3.61767	3.60285	3.60028		3.67273	3.7703	3.7612		3.75701	3.77042	3.77042		3.84883	3.84884	3.81484
2.69282	4.45296	4.15298	4.01151		3.92978	3.8748	3.8748		3.82909	3.77638	3.77638		3.72355	3.72355	3.69305		3.67785	3.66974	3.67302		3.70787	3.67805	3.64407		3.61779	3.60354	3.60072		3.67251	3.76943	3.76076		3.75751	3.77041	3.77041		3.84966	3.84828	3.81373
2.70002	4.45284	4.15314	4.0116		3.9309	3.87381	3.87381		3.82914	3.7755	3.7755		3.72314	3.72314	3.69359		3.67801	3.6692	3.67411		3.70766	3.67816	3.64479		3.61822	3.60435	3.60142		3.67226	3.76843	3.76031		3.75817	3.77025	3.77025		3.85061	3.84796	3.81277
2.70722	4.45248	4.15317	4.01188		3.93181	3.87273	3.87273		3.82907	3.77446	3.77446		3.72243	3.72243	3.6942		3.6782	3.66846	3.67556		3.70697	3.67813	3.64544		3.6189	3.60514	3.60233		3.67206	3.7674	3.75992		3.75899	3.76999	3.76999		3.85154	3.84789	3.812
2.71442	4.45194	4.15304	4.01233		3.93242	3.8717	3.8717		3.82896	3.77336	3.77336		3.72156	3.72156	3.69489		3.67845	3.66761	3.67721		3.7059	3.67801	3.64589		3.6197	3.60586	3.60342		3.67197	3.76644	3.7596		3.75987	3.76967	3.76967		3.85233	3.8481	3.81141
2.72162	4.45133	4.15275	4.01292		3.93267	3.8708	3.8708		3.82892	3.77222	3.77222		3.72064	3.72064	3.69562		3.67875	3.66673	3.67885		3.70466	3.67787	3.64605		3.62049	3.60644	3.60456		3.67205	3.76565	3.75929		3.76073	3.76931	3.76931		3.85287	3.84858	3.81099
2.72882	4.45076	4.15235	4.01353		3.93255	3.87007	3.87007		3.82901	3.77114	3.77114		3.71981	3.71981	3.69636		3.6791	3.66587	3.68025		3.70345	3.67782	3.64587		3.6211	3.60683	3.60565		3.67232	3.76511	3.75893		3.76149	3.76899	3.76899		3.85311	3.84924	3.81069
2.73602	4.45035	4.15188	4.01407		3.93208	3.86955	3.86955		3.82929	3.77017	3.77017		3.71915	3.71915	3.69712		3.67945	3.66511	3.68128		3.70248	3.67791	3.64532		3.62138	3.60698	3.60658		3.67277	3.76481	3.75846		3.7621	3.76877	3.76877		3.85302	3.84994	3.8105
2.74322	4.45011	4.15143	4.01452		3.9313	3.86929	3.86929		3.82971	3.76937	3.76937		3.71868	3.71868	3.69787		3.67979	3.66455	3.68182		3.70186	3.67821	3.64444		3.62126	3.60686	3.60724		3.67337	3.76477	3.75786		3.76254	3.76875	3.76875		3.85268	3.85051	3.81037
2.75042	4.45006	4.15111	4.01485		3.9303	3.86931	3.86931		3.83022	3.7688	3.7688		3.71839	3.71839	3.69862		3.68006	3.66431	3.68187		3.70162	3.67872	3.64329		3.62069	3.60653	3.60754		3.67408	3.76495	3.75715		3.76276	3.76896	3.76896		3.8522	3.85086	3.81035
2.75762	4.45014	4.15093	4.01506		3.92916	3.86957	3.86957		3.83075	3.76846	3.76846		3.71825	3.71825	3.69936		3.68018	3.66449	3.68152		3.70169	3.67932	3.64205		3.61973	3.60604	3.6074		3.67482	3.76529	3.75634		3.76278	3.76943	3.76943		3.85174	3.85091	3.81046
2.76482	4.45023	4.15092	4.01514		3.92798	3.87001	3.87001		3.83119	3.76832	3.76832		3.7182	3.7182	3.70006		3.6801	3.66504	3.68093		3.70196	3.67987	3.64084		3.61852	3.60546	3.60684		3.67544	3.76574	3.75543		3.76259	3.77013	3.77013		3.85145	3.85069	3.81077
2.77202	4.4502	4.15103	4.01504		3.92686	3.87056	3.87056		3.83142	3.76828	3.76828		3.71823	3.71823	3.70072		3.67985	3.66589	3.68029		3.70229	3.68021	3.63985		3.6172	3.60482	3.6059		3.67586	3.7662	3.75445		3.76226	3.77102	3.77102		3.85142	3.85022	3.81128
2.77922	4.44995	4.15124	4.01475		3.92583	3.87118	3.87118		3.83134	3.76822	3.76822		3.71831	3.71831	3.70132		3.67948	3.66701	3.67973		3.70256	3.68022	3.63922		3.6159	3.6042	3.60467		3.67599	3.76656	3.7535		3.76185	3.77203	3.77203		3.85169	3.84957	3.81193
2.78642	4.44948	4.15152	4.01429		3.92494	3.87188	3.87188		3.83096	3.76804	3.76804		3.71844	3.71844	3.70185		3.67906	3.6683	3.67933		3.7027	3.67984	3.63902		3.61473	3.60372	3.6033		3.67584	3.76676	3.7527		3.7614	3.77306	3.77306		3.85222	3.84884	3.81266
2.79362	4.44887	4.15184	4.01372		3.92419	3.87259	3.87259		3.83032	3.76768	3.76768		3.71861	3.71861	3.70228		3.6786	3.66965	3.67905		3.70266	3.67907	3.6393		3.61379	3.60349	3.60199		3.67546	3.76675	3.7522		3.76089	3.77399	3.77399		3.85296	3.84811	3.81343
2.80082	4.44822	4.15213	4.01312		3.92361	3.87325	3.87325		3.82957	3.76716	3.76716		3.71881	3.71881	3.70253		3.67815	3.67089	3.67879		3.7025	3.67793	3.64		3.61316	3.60357	3.60087		3.67494	3.76649	3.75206		3.76031	3.77472	3.77472		3.8538	3.84747	3.81423
2.80802	4.44764	4.15229	4.01258		3.92318	3.87382	3.87382		3.82885	3.76651	3.76651		3.71899	3.71899	3.70253		3.67771	3.67185	3.67844		3.70231	3.67662	3.64097		3.61282	3.60397	3.60007		3.67436	3.76602	3.75227		3.7596	3.77519	3.77519		3.85461	3.84699	3.81506
2.81522	4.4472	4.15232	4.01219		3.92293	3.87427	3.87427		3.82829	3.76585	3.76585		3.71913	3.71913	3.70223		3.67736	3.6724	3.67783		3.70219	3.67534	3.64202		3.6127	3.60461	3.59964		3.67383	3.76537	3.75279		3.75878	3.77536	3.77536		3.85525	3.84665	3.81589
2.82242	4.44689	4.15221	4.01199		3.92283	3.87465	3.87465		3.82798	3.76533	3.76533		3.71916	3.71916	3.70163		3.67709	3.67252	3.6769		3.70219	3.67429	3.64295		3.61264	3.60538	3.59955		3.6734	3.76467	3.75357		3.75784	3.77525	3.77525		3.8556	3.84641	3.81672
2.82962	4.44671	4.15198	4.01207		3.92287	3.87501	3.87501		3.82798	3.76508	3.76508		3.71906	3.71906	3.70077		3.67688	3.67222	3.67565		3.7024	3.67363	3.64365		3.61249	3.60616	3.59968		3.67315	3.76404	3.75453		3.75682	3.77485	3.77485		3.85568	3.84624	3.81751
2.83682	4.44662	4.15164	4.01238		3.92309	3.87535	3.87535		3.82829	3.76519	3.76519		3.71881	3.71881	3.6997		3.67669	3.67154	3.67416		3.70281	3.67345	3.64406		3.61215	3.60678	3.59986		3.67305	3.76363	3.75559		3.75577	3.77422	3.77422		3.85553	3.84605	3.81827
2.84402	4.44654	4.15121	4.01292		3.92346	3.87573	3.87573		3.82882	3.76566	3.76566		3.71844	3.71844	3.69852		3.6765	3.6705	3.67262		3.7034	3.67375	3.64417		3.61161	3.60708	3.59995		3.67308	3.76357	3.75664		3.75472	3.77344	3.77344		3.85523	3.8458	3.81897
2.85122	4.44636	4.15076	4.01359		3.92397	3.87613	3.87613		3.82949	3.76645	3.76645		3.71799	3.71799	3.69733		3.6763	3.66918	3.67123		3.70413	3.67447	3.644		3.61089	3.60699	3.59983		3.67315	3.76394	3.75757		3.75373	3.77266	3.77266		3.85486	3.84551	3.81955
2.85842	4.44605	4.15041	4.0143		3.92459	3.87654	3.87654		3.83016	3.76747	3.76747		3.7175	3.7175	3.69619		3.67609	3.66773	3.67023		3.70489	3.67545	3.64366		3.61001	3.60648	3.59945		3.67322	3.76475	3.75834		3.75289	3.77198	3.77198		3.8545	3.84522	3.81992
2.86562	4.44561	4.15022	4.01496		3.92528	3.87688	3.87688		3.83072	3.76863	3.76863		3.71705	3.71705	3.69519		3.67587	3.66627	3.66974		3.70557	3.67651	3.6432		3.60906	3.60566	3.59879		3.67329	3.766	3.75897		3.75226	3.77148	3.77148		3.85422	3.84503	3.82
2.87282	4.44512	4.15021	4.01554		3.92602	3.87701	3.87701		3.83111	3.76982	3.76982		3.7167	3.7167	3.69434		3.67569	3.66495	3.66984		3.70608	3.67745	3.64271		3.60821	3.60467	3.59793		3.67337	3.76762	3.75953		3.75193	3.77122	3.77122		3.8541	3.845	3.81975
2.88002	4.44463	4.15032	4.01604		3.92675	3.87679	3.87679		3.83128	3.77094	3.77094		3.71647	3.71647	3.69364		3.67559	3.6639	3.67048		3.70633	3.67816	3.64222		3.60762	3.60369	3.59697		3.67354	3.76945	3.76005		3.75187	3.77118	3.77118		3.85414	3.84519	3.81925
2.88722	4.44418	4.15049	4.01648		3.92742	3.87613	3.87613		3.8313	3.77195	3.77195		3.71634	3.71634	3.6931		3.67566	3.66319	3.67154		3.70628	3.67858	3.64171		3.60742	3.60286	3.59607		3.67383	3.77135	3.76055		3.75205	3.77141	3.77141		3.8543	3.84563	3.81858
2.89442	4.4437	4.15066	4.01685		3.92794	3.87499	3.87499		3.83124	3.77281	3.77281		3.71627	3.71627	3.69275		3.67595	3.66287	3.67281		3.7059	3.67871	3.64111		3.60757	3.6023	3.59535		3.67426	3.77309	3.76098		3.75237	3.77188	3.77188		3.85448	3.84628	3.81788
2.90162	4.44317	4.1508	4.01717		3.9283	3.87347	3.87347		3.83115	3.77349	3.77349		3.71622	3.71622	3.69257		3.67647	3.6629	3.67406		3.70522	3.67855	3.64037		3.60798	3.60202	3.5949		3.67483	3.77452	3.76123		3.75282	3.77249	3.77249		3.85463	3.84709	3.81723
2.90882	4.44255	4.15087	4.0174		3.92847	3.8717	3.8717		3.83106	3.77395	3.77395		3.71618	3.71618	3.69254		3.67717	3.66321	3.67512		3.7043	3.67819	3.63951		3.60853	3.60202	3.59475		3.67546	3.77555	3.76123		3.75335	3.77311	3.77311		3.85467	3.84798	3.81673
2.91602	4.44183	4.15085	4.01747		3.92846	3.86987	3.86987		3.83101	3.77411	3.77411		3.71613	3.71613	3.69264		3.67801	3.66369	3.67584		3.70323	3.67772	3.6386		3.60909	3.60224	3.59491		3.67606	3.77615	3.76086		3.75395	3.77363	3.77363		3.85458	3.84887	3.81646
2.92322	4.441	4.15079	4.01729		3.92827	3.86821	3.86821		3.83101	3.77392	3.77392		3.71608	3.71608	3.69285		3.67889	3.66424	3.67615		3.70214	3.67726	3.63776		3.6096	3.60256	3.59535		3.6765	3.77637	3.76005		3.75457	3.77398	3.77398		3.85434	3.84967	3.81646
2.93042	4.44004	4.15077	4.01682		3.92795	3.86688	3.86688		3.83104	3.77335	3.77335		3.71605	3.71605	3.69316		3.67971	3.66477	3.67604		3.70119	3.6769	3.63712		3.60996	3.60285	3.59602		3.67671	3.77623	3.75882		3.75513	3.77413	3.77413		3.85394	3.85031	3.81674
2.93762	4.43898	4.15085	4.01602		3.92759	3.866	3.866		3.83108	3.77238	3.77238		3.71604	3.71604	3.69355		3.68037	3.6652	3.6756		3.70052	3.67669	3.63678		3.61014	3.60301	3.59685		3.67661	3.77582	3.7572		3.75562	3.77407	3.77407		3.85342	3.85073	3.81724
2.94482	4.43788	4.15108	4.01487		3.92728	3.86566	3.86566		3.83107	3.77105	3.77105		3.71609	3.71609	3.694		3.68077	3.6655	3.67495		3.70019	3.67664	3.63679		3.61015	3.60301	3.59773		3.67622	3.77527	3.75537		3.75607	3.77377	3.77377		3.85287	3.85092	3.81786
2.95202	4.43682	4.15142	4.01341		3.9271	3.86584	3.86584		3.83093	3.76945	3.76945		3.71622	3.71622	3.69447		3.68088	3.66572	3.67424		3.70021	3.67675	3.63722		3.61003	3.60287	3.59854		3.67561	3.7747	3.75355		3.75651	3.77323	3.77323		3.85236	3.8509	3.81854
2.95922	4.43589	4.1518	4.01174		3.92709	3.86646	3.86646		3.83062	3.76769	3.76769		3.71641	3.71641	3.69499		3.68068	3.66591	3.67358		3.70051	3.67698	3.63802		3.60987	3.60268	3.59924		3.67488	3.77424	3.75201		3.75693	3.7725	3.7725		3.85192	3.85073	3.81919
2.96642	4.43512	4.15211	4.01003		3.92727	3.86738	3.86738		3.83015	3.76595	3.76595		3.71662	3.71662	3.69557		3.68021	3.66613	3.67306		3.70103	3.67731	3.63911		3.60974	3.60246	3.5998		3.67415	3.77392	3.75091		3.75728	3.77166	3.77166		3.85156	3.85047	3.81979
2.97362	4.43448	4.1522	4.00846		3.92766	3.86838	3.86838		3.82953	3.76438	3.76438		3.71682	3.71682	3.69624		3.6795	3.66643	3.67268		3.70168	3.67763	3.64033		3.60965	3.6023	3.60025		3.67352	3.77366	3.7504		3.75751	3.77082	3.77082		3.85122	3.85017	3.82028
2.98082	4.434	4.15198	4.00724		3.92824	3.86932	3.86932		3.82881	3.76308	3.76308		3.71701	3.71701	3.69702		3.67862	3.66682	3.67242		3.70238	3.67782	3.6415		3.60958	3.60225	3.6006		3.67303	3.7734	3.75046		3.75761	3.77004	3.77004		3.8509	3.84994	3.82061
2.98802	4.43365	4.15142	4.0065		3.92894	3.87009	3.87009		3.82802	3.76211	3.76211		3.71721	3.71721	3.69786		3.67764	3.66726	3.67225		3.70301	3.67774	3.6425		3.60951	3.60239	3.60088		3.67269	3.77312	3.75103		3.75765	3.76937	3.76937		3.85052	3.84985	3.82079
2.99522	4.43349	4.15053	4.00628		3.92967	3.87064	3.87064		3.82725	3.76148	3.76148		3.71746	3.71746	3.69869		3.6766	3.66771	3.67213		3.70347	3.67731	3.64323		3.60943	3.60275	3.60112		3.67243	3.77281	3.75202		3.75763	3.76886	3.76886		3.8501	3.84994	3.82082
3.00242	4.43352	4.14936	4.00655		3.93031	3.87093	3.87093		3.82658	3.76114	3.76114		3.7178	3.7178	3.69942		3.67557	3.66808	3.67205		3.70374	3.67647	3.64366		3.60935	3.60329	3.60134		3.67219	3.77249	3.75326		3.75758	3.76857	3.76857		3.84965	3.85023	3.82075
3.00962	4.43372	4.148	4.00728		3.93077	3.87099	3.87099		3.82608	3.76101	3.76101		3.7182	3.7182	3.69996		3.6746	3.66831	3.67199		3.70383	3.67523	3.64379		3.60928	3.60394	3.60155		3.6719	3.77218	3.75459		3.75747	3.76855	3.76855		3.84926	3.8507	3.82061
3.01682	4.43403	4.14658	4.00834		3.931	3.87084	3.87084		3.82584	3.76098	3.76098		3.71863	3.71863	3.70026		3.67371	3.66836	3.67196		3.70378	3.67364	3.64366		3.60921	3.6046	3.60169		3.67154	3.77191	3.75584		3.75735	3.76881	3.76881		3.84899	3.85129	3.82044
3.02402	4.43437	4.14517	4.00957		3.93097	3.87052	3.87052		3.82585	3.76101	3.76101		3.71901	3.71901	3.70029		3.67292	3.66821	3.672		3.70364	3.6718	3.64333		3.60914	3.60524	3.60171		3.67112	3.77172	3.75696		3.75724	3.7693	3.7693		3.84898	3.8519	3.82026
3.03122	4.43467	4.14386	4.01075		3.93067	3.87014	3.87014		3.8261	3.76105	3.76105		3.71929	3.71929	3.70009		3.67226	3.66792	3.67218		3.7034	3.66986	3.64287		3.60907	3.60579	3.60156		3.6707	3.77166	3.75792		3.75715	3.76995	3.76995		3.84927	3.8524	3.82006
3.03842	4.43486	4.14272	4.01166		3.93014	3.86978	3.86978		3.8265	3.76111	3.76111		3.71941	3.71941	3.69973		3.67171	3.66753	3.67255		3.70311	3.66799	3.64237		3.60901	3.60621	3.60126		3.67035	3.77177	3.75873		3.75707	3.77069	3.77069		3.84989	3.85268	3.81987
3.04562	4.43488	4.14175	4.01219		3.92944	3.86946	3.86946		3.82696	3.76123	3.76123		3.71931	3.71931	3.6993		3.67125	3.66706	3.67308		3.70276	3.66637	3.64187		3.60895	3.60642	3.60084		3.67016	3.77202	3.75938		3.75694	3.77148	3.77148		3.85073	3.85265	3.81967
3.05282	4.43469	4.141	4.0123		3.92865	3.86919	3.86919		3.82736	3.76142	3.76142		3.71892	3.71892	3.69887		3.67082	3.66654	3.67377		3.70243	3.66508	3.6414		3.60889	3.60639	3.60036		3.67022	3.77231	3.75987		3.75676	3.7723	3.7723		3.85167	3.85222	3.81946
3.06002	4.43432	4.1405	4.01205		3.92786	3.86893	3.86893		3.8276	3.76171	3.76171		3.71823	3.71823	3.69846		3.67041	3.66603	3.67454		3.70215	3.66421	3.64097		3.60887	3.60612	3.59989		3.6706	3.77249	3.76015		3.75653	3.77316	3.77316		3.85256	3.85138	3.8192
3.06722	4.43385	4.14029	4.01152		3.92719	3.86868	3.86868		3.82756	3.76213	3.76213		3.71729	3.71729	3.69807		3.67	3.66555	3.6753		3.70195	3.66378	3.64056		3.60896	3.60566	3.5995		3.67129	3.77246	3.76024		3.7563	3.77405	3.77405		3.8533	3.85014	3.81882
3.07442	4.43338	4.14037	4.01084		3.92669	3.86844	3.86844		3.82722	3.76269	3.76269		3.71623	3.71623	3.69769		3.66963	3.66519	3.67596		3.70178	3.66379	3.64013		3.60924	3.60506	3.59926		3.67227	3.77216	3.7601		3.75608	3.77496	3.77496		3.85383	3.8486	3.8183
3.08162	4.43302	4.14074	4.01018		3.92637	3.86825	3.86825		3.82664	3.76336	3.76336		3.71518	3.71518	3.69729		3.66935	3.66497	3.67647		3.70161	3.6642	3.63966		3.60978	3.6043	3.59919		3.67348	3.77163	3.75972		3.75589	3.77584	3.77584		3.85411	3.84688	3.81763
3.08882	4.43285	4.14137	4.00971		3.92621	3.86811	3.86811		3.82588	3.76407	3.76407		3.71423	3.71423	3.69686		3.66921	3.66491	3.67678		3.70137	3.66496	3.63916		3.61059	3.60345	3.5993		3.67482	3.77096	3.75912		3.75573	3.77669	3.77669		3.85423	3.84515	3.81683
3.09602	4.43285	4.14217	4.00956		3.92612	3.86802	3.86802		3.82509	3.76473	3.76473		3.71349	3.71349	3.69641		3.66929	3.66504	3.67687		3.70103	3.66603	3.63864		3.61165	3.60253	3.59957		3.67625	3.77024	3.75837		3.75564	3.77744	3.77744		3.85433	3.84358	3.81592
3.10322	4.43297	4.14307	4.00977		3.92607	3.86797	3.86797		3.8244	3.76528	3.76528		3.71304	3.71304	3.69595		3.66964	3.66536	3.67674		3.70058	3.66732	3.63816		3.61287	3.60163	3.59994		3.67767	3.76958	3.75761		3.7556	3.77806	3.77806		3.8546	3.84232	3.81494
3.11042	4.43307	4.14389	4.01027		3.926	3.86794	3.86794		3.82392	3.76567	3.76567		3.71293	3.71293	3.69556		3.67027	3.66586	3.67641		3.70004	3.66874	3.63775		3.61416	3.60082	3.60037		3.67898	3.76905	3.75693		3.75562	3.77843	3.77843		3.85525	3.84148	3.81389
3.11762	4.43302	4.14454	4.01094		3.92587	3.86789	3.86789		3.82369	3.76588	3.76588		3.71315	3.71315	3.69532		3.67115	3.66652	3.67591		3.69942	3.67019	3.63746		3.61537	3.60018	3.60079		3.68009	3.76878	3.75642		3.75569	3.77845	3.77845		3.85633	3.84113	3.81289
3.12482	4.43269	4.14494	4.01162		3.92563	3.86778	3.86778		3.82372	3.76586	3.76586		3.71366	3.71366	3.69525		3.67216	3.66721	3.67532		3.69877	3.67156	3.63732		3.6164	3.59973	3.60116		3.68093	3.76887	3.75612		3.75579	3.77808	3.77808		3.85783	3.84125	3.81202
3.13202	4.43203	4.14507	4.01217		3.92526	3.86751	3.86751		3.82395	3.76561	3.76561		3.71438	3.71438	3.69533		3.6732	3.66783	3.67469		3.69815	3.67274	3.63737		3.61718	3.5995	3.60147		3.68142	3.76933	3.75607		3.75592	3.77737	3.77737		3.85958	3.84172	3.81142
3.13922	4.43106	4.14493	4.01247		3.92474	3.86703	3.86703		3.82427	3.76517	3.76517		3.71519	3.71519	3.69549		3.67413	3.66828	3.67413		3.69762	3.67358	3.63761		3.6177	3.59949	3.60171		3.68151	3.77007	3.75625		3.75608	3.7764	3.7764		3.86134	3.84236	3.8111
3.14642	4.42985	4.14454	4.01242		3.92411	3.86633	3.86633		3.82457	3.76464	3.76464		3.71596	3.71596	3.69565		3.67489	3.66855	3.6737		3.69721	3.67399	3.63798		3.61801	3.59971	3.60191		3.68116	3.77093	3.75662		3.75627	3.77527	3.77527		3.86286	3.84303	3.81106
3.15362	4.42854	4.14397	4.01204		3.92342	3.8655	3.8655		3.82478	3.76415	3.76415		3.7166	3.7166	3.69576		3.67541	3.6686	3.67343		3.69692	3.67396	3.63842		3.61818	3.60008	3.60209		3.68041	3.77181	3.7571		3.75648	3.77405	3.77405		3.86393	3.8436	3.81128
3.16082	4.42727	4.14333	4.01139		3.92271	3.8647	3.8647		3.82487	3.76387	3.76387		3.71705	3.71705	3.69577		3.67566	3.66847	3.67337		3.6967	3.67354	3.63883		3.61835	3.60053	3.60227		3.67933	3.7726	3.75758		3.7567	3.77276	3.77276		3.86436	3.84402	3.81174
3.16802	4.42618	4.14273	4.01056		3.92197	3.86409	3.86409		3.82488	3.76386	3.76386		3.71735	3.71735	3.69564		3.67563	3.66821	3.6735		3.6965	3.67287	3.63917		3.61861	3.60097	3.60249		3.67807	3.77325	3.75803		3.75687	3.77148	3.77148		3.86405	3.8443	3.81241
3.17522	4.42534	4.14222	4.00969		3.92123	3.86381	3.86381		3.82489	3.76412	3.76412		3.71758	3.71758	3.69534		3.6754	3.66786	3.67377		3.69632	3.67211	3.63945		3.61899	3.60136	3.60273		3.67679	3.77365	3.75838		3.75695	3.77026	3.77026		3.86303	3.84446	3.81321
3.18242	4.4248	4.1418	4.00887		3.9205	3.86399	3.86399		3.825	3.76461	3.76461		3.71784	3.71784	3.69489		3.67506	3.6675	3.67411		3.69619	3.67141	3.63969		3.61945	3.60166	3.60295		3.67566	3.77369	3.75863		3.75688	3.76914	3.76914		3.86147	3.84457	3.814
3.18962	4.42458	4.14144	4.00817		3.9198	3.86469	3.86469		3.82529	3.76524	3.76524		3.71819	3.71819	3.69433		3.67469	3.6672	3.67446		3.69617	3.6709	3.63997		3.61995	3.60185	3.60305		3.67482	3.77332	3.75879		3.75667	3.76812	3.76812		3.85966	3.84468	3.81466
3.19682	4.42466	4.14113	4.00761		3.91919	3.8659	3.8659		3.82579	3.76591	3.76591		3.71867	3.71867	3.69368		3.67438	3.66702	3.67471		3.69632	3.67067	3.64032		3.62037	3.60193	3.60299		3.67434	3.77255	3.75884		3.75631	3.76719	3.76719		3.85789	3.84489	3.81511
3.20402	4.42499	4.14088	4.00719		3.9187	3.86751	3.86751		3.82648	3.7665	3.7665		3.71929	3.71929	3.69297		3.67417	3.66699	3.6748		3.69665	3.67076	3.64077		3.62064	3.6019	3.60272		3.67422	3.77148	3.75882		3.75587	3.76641	3.76641		3.85641	3.84521	3.81534
3.21122	4.42551	4.14067	4.00687		3.91834	3.86932	3.86932		3.82728	3.76685	3.76685		3.72004	3.72004	3.69224		3.67409	3.66708	3.67467		3.69719	3.67111	3.64133		3.62063	3.60178	3.60225		3.67436	3.7702	3.75876		3.75539	3.76588	3.76588		3.85532	3.84565	3.81531
3.21842	4.42619	4.14046	4.00665		3.91812	3.87109	3.87109		3.82808	3.76686	3.76686		3.72083	3.72083	3.69154		3.67417	3.6673	3.67434		3.6979	3.67157	3.64196		3.62027	3.60162	3.60162		3.67464	3.76885	3.75872		3.75493	3.76566	3.76566		3.85464	3.84613	3.81504
3.22562	4.427	4.14023	4.00649		3.91806	3.8726	3.8726		3.82869	3.76653	3.76653		3.72151	3.72151	3.69095		3.67441	3.66765	3.67382		3.69869	3.67197	3.64259		3.61955	3.60145	3.60093		3.67489	3.76753	3.75875		3.7546	3.76583	3.76583		3.8543	3.84659	3.81455
3.23282	4.42791	4.14001	4.00643		3.91816	3.87371	3.87371		3.82896	3.76595	3.76595		3.72189	3.72189	3.69052		3.67474	3.6681	3.67321		3.69943	3.67221	3.64314		3.61847	3.60131	3.60032		3.67499	3.76636	3.75887		3.75448	3.76635	3.76635		3.85424	3.847	3.81396
3.24002	4.42888	4.13986	4.00646		3.91845	3.87431	3.87431		3.82878	3.76525	3.76525		3.72187	3.72187	3.6903		3.67506	3.66865	3.67259		3.70001	3.67221	3.64352		3.61712	3.60119	3.59992		3.67485	3.76545	3.75909		3.75463	3.76714	3.76714		3.8543	3.84732	3.81339
3.24722	4.42978	4.13983	4.0066		3.91887	3.8744	3.8744		3.82816	3.76453	3.76453		3.72143	3.72143	3.69033		3.67525	3.66924	3.67202		3.70032	3.67197	3.64365		3.61557	3.60109	3.59983		3.67447	3.76486	3.75937		3.75504	3.76816	3.76816		3.85435	3.84758	3.81292
3.25442	4.4305	4.13997	4.00687		3.91936	3.87397	3.87397		3.82716	3.76383	3.76383		3.72063	3.72063	3.69062		3.67522	3.66982	3.67155		3.70038	3.67153	3.64351		3.61393	3.60097	3.60006		3.67387	3.76465	3.75968		3.75564	3.76933	3.76933		3.8542	3.84775	3.81261
3.26162	4.43094	4.14022	4.00727		3.91983	3.87311	3.87311		3.82596	3.76317	3.76317		3.71957	3.71957	3.69111		3.67494	3.67031	3.67122		3.70021	3.67094	3.64314		3.61232	3.60081	3.60054		3.67314	3.76478	3.75994		3.75636	3.77061	3.77061		3.85376	3.84786	3.81247
3.26882	4.43102	4.14059	4.00775		3.9202	3.87197	3.87197		3.82472	3.76251	3.76251		3.71836	3.71836	3.69174		3.67441	3.67066	3.67107		3.69994	3.67034	3.64263		3.61087	3.60053	3.60116		3.67234	3.76515	3.76008		3.75714	3.7719	3.7719		3.85301	3.84785	3.81248
3.27602	4.43074	4.1411	4.00822		3.92042	3.87068	3.87068		3.82363	3.76185	3.76185		3.71717	3.71717	3.6924		3.67365	3.67081	3.67112		3.69968	3.66985	3.64211		3.60971	3.60004	3.60185		3.67156	3.76564	3.76003		3.75791	3.77311	3.77311		3.85205	3.84773	3.8126
3.28322	4.43016	4.14171	4.00857		3.92047	3.86934	3.86934		3.82284	3.76112	3.76112		3.71613	3.71613	3.69297		3.67279	3.67076	3.67134		3.69952	3.66955	3.64169		3.60895	3.59929	3.60249		3.67085	3.76617	3.75975		3.75859	3.77416	3.77416		3.85097	3.84747	3.81275
3.29042	4.4294	4.14236	4.00873		3.92032	3.86802	3.86802		3.82246	3.76033	3.76033		3.71538	3.71538	3.69336		3.67194	3.67048	3.67166		3.6995	3.6695	3.64147		3.60864	3.59825	3.60302		3.67023	3.76666	3.75924		3.75912	3.77508	3.77508		3.84986	3.84704	3.81283
3.29762	4.42862	4.14296	4.00864		3.92005	3.86678	3.86678		3.82249	3.75947	3.75947		3.715	3.715	3.69351		3.67128	3.66998	3.67201		3.69958	3.66964	3.6415		3.60881	3.59705	3.60338		3.66969	3.7671	3.75855		3.75947	3.77586	3.77586		3.84878	3.84643	3.81272
3.30482	4.42795	4.14345	4.00832		3.91975	3.86567	3.86567		3.82282	3.75866	3.75866		3.71497	3.71497	3.69337		3.67094	3.66927	3.67235		3.69973	3.66992	3.6418		3.60942	3.59581	3.60358		3.66916	3.76747	3.75775		3.75968	3.77648	3.77648		3.84777	3.84564	3.8124
3.31202	4.4275	4.14377	4.00777		3.9195	3.86474	3.86474		3.82333	3.75801	3.75801		3.71519	3.71519	3.69298		3.67101	3.66845	3.67267		3.69987	3.67023	3.64237		3.61037	3.59472	3.60367		3.66864	3.7678	3.75695		3.75979	3.77687	3.77687		3.84688	3.84472	3.81186
3.31922	4.42732	4.1439	4.007		3.91938	3.86403	3.86403		3.82388	3.75766	3.75766		3.71555	3.71555	3.69242		3.67151	3.66761	3.67295		3.69996	3.67052	3.64319		3.61152	3.59399	3.60371		3.66811	3.76809	3.75629		3.75981	3.77702	3.77702		3.84617	3.84372	3.81114
3.32642	4.4274	4.14379	4.00607		3.91944	3.86355	3.86355		3.82434	3.75767	3.75767		3.7159	3.7159	3.69178		3.67234	3.66683	3.67315		3.69996	3.67073	3.64418		3.61272	3.59377	3.60376		3.66759	3.7684	3.75587		3.7598	3.77696	3.77696		3.84571	3.84274	3.81029
3.33362	4.42767	4.14345	4.00509		3.91971	3.86328	3.86328		3.82463	3.75805	3.75805		3.71612	3.71612	3.69117		3.67336	3.66616	3.67325		3.69988	3.67084	3.64522		3.61385	3.59415	3.60383		3.66711	3.76872	3.75577		3.75981	3.77679	3.77679		3.84549	3.84184	3.80939
3.34082	4.42802	4.14291	4.00419		3.92015	3.86321	3.86321		3.82469	3.75871	3.75871		3.71612	3.71612	3.69065		3.67444	3.6656	3.67323		3.69974	3.67081	3.64621		3.61481	3.59512	3.60398		3.6667	3.76902	3.75597		3.75993	3.7766	3.7766		3.84552	3.84108	3.80853
3.34802	4.42829	4.14223	4.00348		3.9207	3.86331	3.86331		3.82455	3.75949	3.75949		3.71584	3.71584	3.6903		3.67542	3.6652	3.67312		3.69958	3.67066	3.64704		3.61558	3.59656	3.60418		3.66637	3.76922	3.75644		3.76022	3.77645	3.77645		3.8458	3.84056	3.80785
3.35522	4.42835	4.14149	4.00301		3.9213	3.86358	3.86358		3.82426	3.76021	3.76021		3.71531	3.71531	3.69015		3.67618	3.66499	3.67299		3.69945	3.6704	3.64767		3.61615	3.59827	3.60447		3.66611	3.76922	3.75707		3.7607	3.77637	3.77637		3.84635	3.84032	3.80745
3.36242	4.4282	4.14078	4.0028		3.92189	3.86398	3.86398		3.82387	3.76071	3.76071		3.71455	3.71455	3.69023		3.67666	3.66498	3.67289		3.69937	3.67011	3.64813		3.61661	3.60003	3.60483		3.66594	3.76896	3.75774		3.7613	3.77634	3.77634		3.84721	3.84036	3.8074
3.36962	4.42784	4.14014	4.00283		3.92246	3.8645	3.8645		3.82341	3.76087	3.76087		3.71368	3.71368	3.69056		3.67685	3.66514	3.67286		3.69933	3.6698	3.64838		3.61701	3.60163	3.60527		3.66585	3.76841	3.75838		3.76195	3.77634	3.77634		3.84838	3.84067	3.80769
3.37682	4.42736	4.13967	4.0031		3.92302	3.8651	3.8651		3.82285	3.76065	3.76065		3.71282	3.71282	3.69107		3.67678	3.66542	3.67298		3.69933	3.66949	3.64845		3.6174	3.60296	3.60574		3.66583	3.76765	3.75891		3.76258	3.77635	3.77635		3.84981	3.84117	3.80836
3.38402	4.42684	4.13938	4.00361		3.92354	3.86575	3.86575		3.82219	3.7601	3.7601		3.71202	3.71202	3.69167		3.67655	3.66572	3.67333		3.69929	3.66914	3.64838		3.61781	3.60396	3.60612		3.66586	3.76673	3.7593		3.7631	3.77627	3.77627		3.8514	3.84187	3.80933
3.39122	4.42635	4.13926	4.00429		3.92401	3.86645	3.86645		3.82139	3.75933	3.75933		3.71134	3.71134	3.69223		3.67624	3.66597	3.67398		3.69923	3.66875	3.64829		3.6182	3.60465	3.60632		3.66591	3.76579	3.75955		3.76342	3.77597	3.77597		3.85302	3.84274	3.81051
3.39842	4.42595	4.13925	4.00507		3.92439	3.8672	3.8672		3.82047	3.75852	3.75852		3.71077	3.71077	3.6927		3.67593	3.66611	3.67497		3.69913	3.6683	3.64828		3.61852	3.60509	3.6062		3.66599	3.76497	3.75968		3.76345	3.77531	3.77531		3.85457	3.84373	3.81176
3.40562	4.42569	4.13932	4.00586		3.92463	3.86797	3.86797		3.81945	3.75782	3.75782		3.71029	3.71029	3.693		3.67569	3.66613	3.67624		3.69902	3.66778	3.64835		3.61871	3.60531	3.60571		3.66615	3.76441	3.75974		3.76316	3.77427	3.77427		3.85594	3.84477	3.81292
3.41282	4.42555	4.13946	4.00661		3.92468	3.86873	3.86873		3.81844	3.75739	3.75739		3.70982	3.70982	3.69312		3.67557	3.66602	3.67769		3.6989	3.66717	3.64847		3.6187	3.60538	3.60487		3.66644	3.76421	3.75975		3.76259	3.77292	3.77292		3.85704	3.84575	3.81383
3.42002	4.42551	4.13966	4.00732		3.92451	3.86942	3.86942		3.81757	3.75729	3.75729		3.7093	3.7093	3.69303		3.67556	3.6658	3.67921		3.69876	3.66644	3.64854		3.61843	3.60536	3.60371		3.66689	3.7644	3.75976		3.76191	3.77141	3.77141		3.8578	3.84657	3.81434
3.42722	4.42552	4.13989	4.00801		3.92408	3.87	3.87		3.81697	3.75755	3.75755		3.70868	3.70868	3.69273		3.67568	3.66548	3.68067		3.69855	3.66561	3.64848		3.61791	3.60525	3.60236		3.66747	3.76491	3.75978		3.76127	3.76988	3.76988		3.85817	3.84718	3.81436
3.43442	4.42549	4.1401	4.00869		3.92342	3.87043	3.87043		3.81674	3.75812	3.75812		3.70793	3.70793	3.69226		3.67588	3.6651	3.68196		3.69825	3.66473	3.64821		3.61714	3.60505	3.601		3.6682	3.76566	3.7598		3.76082	3.76851	3.76851		3.85817	3.84755	3.81387
3.44162	4.42533	4.14025	4.00929		3.92255	3.87067	3.87067		3.81687	3.75891	3.75891		3.70706	3.70706	3.69173		3.67618	3.66475	3.68299		3.69788	3.66387	3.64766		3.61618	3.60471	3.59979		3.66902	3.76655	3.75975		3.76062	3.76741	3.76741		3.85783	3.84765	3.81292
3.44882	4.42497	4.14029	4.00981		3.92159	3.87069	3.87069		3.81728	3.7598	3.7598		3.7061	3.7061	3.69121		3.67655	3.66449	3.68372		3.69747	3.66312	3.64677		3.61509	3.60422	3.59891		3.66996	3.76748	3.75966		3.7607	3.76674	3.76674		3.85729	3.8474	3.81168
3.45602	4.42441	4.14026	4.01024		3.92058	3.87044	3.87044		3.81784	3.76069	3.76069		3.70514	3.70514	3.69086		3.67696	3.66433	3.68413		3.69704	3.66259	3.64558		3.61395	3.60363	3.59846		3.67094	3.76835	3.75952		3.76104	3.76657	3.76657		3.85665	3.84679	3.81032
3.46322	4.42365	4.14011	4.01058		3.9196	3.86988	3.86988		3.81839	3.76148	3.76148		3.70427	3.70427	3.6907		3.67737	3.66426	3.68429		3.69663	3.66235	3.64422		3.61282	3.603	3.59843		3.67191	3.76907	3.75937		3.76158	3.76691	3.76691		3.85597	3.84587	3.80905
3.47042	4.42276	4.1398	4.0108		3.91864	3.86902	3.86902		3.81879	3.76211	3.76211		3.7036	3.7036	3.69074		3.67773	3.66416	3.68422		3.69633	3.66248	3.64284		3.61177	3.60238	3.59876		3.67278	3.76961	3.75929		3.76224	3.76762	3.76762		3.85534	3.84474	3.80805
3.47762	4.42178	4.13932	4.01087		3.91774	3.86789	3.86789		3.81896	3.76254	3.76254		3.70323	3.70323	3.69095		3.67797	3.66398	3.684		3.69626	3.66298	3.64158		3.61088	3.60177	3.59926		3.67349	3.76999	3.7593		3.76288	3.76848	3.76848		3.8548	3.84353	3.80743
3.48482	4.4208	4.1387	4.01073		3.91694	3.86658	3.86658		3.81886	3.76276	3.76276		3.70324	3.70324	3.69132		3.6781	3.66362	3.68361		3.69657	3.6638	3.64055		3.61016	3.60114	3.59975		3.67399	3.7703	3.75946		3.76337	3.76931	3.76931		3.85436	3.84238	3.80725
3.49202	4.41993	4.138	4.01037		3.91632	3.86522	3.86522		3.81855	3.76283	3.76283		3.70364	3.70364	3.69182		3.6781	3.66306	3.68302		3.69734	3.66485	3.63979		3.60968	3.60054	3.60003		3.67428	3.77062	3.75978		3.76365	3.76992	3.76992		3.85408	3.84142	3.8075
3.49922	4.41929	4.13737	4.00981		3.91592	3.86395	3.86395		3.81812	3.76278	3.76278		3.70442	3.70442	3.69246		3.67799	3.66232	3.6822		3.69855	3.66596	3.63932		3.60947	3.60002	3.59998		3.67433	3.77099	3.76023		3.76373	3.77025	3.77025		3.85394	3.84073	3.80812
3.50642	4.41895	4.13686	4.00906		3.91576	3.86291	3.86291		3.81768	3.76267	3.76267		3.70554	3.70554	3.69318		3.67778	3.66145	3.68116		3.70008	3.66699	3.63913		3.60956	3.59962	3.59954		3.67415	3.77146	3.76077		3.76365	3.77026	3.77026		3.85391	3.84037	3.80899
3.51362	4.41895	4.13654	4.00816		3.91592	3.86216	3.86216		3.81728	3.76253	3.76253		3.70691	3.70691	3.69391		3.67749	3.66055	3.67996		3.70176	3.6678	3.63911		3.60994	3.59936	3.59874		3.67376	3.77205	3.76128		3.76347	3.76999	3.76999		3.85396	3.84037	3.81
3.52082	4.41927	4.13641	4.00716		3.91642	3.86177	3.86177		3.81694	3.76241	3.76241		3.70842	3.70842	3.69459		3.67715	3.65971	3.67867		3.70346	3.66829	3.63921		3.61055	3.59924	3.59766		3.67323	3.77277	3.76166		3.7632	3.76956	3.76956		3.85403	3.84073	3.81103
3.52802	4.41985	4.13646	4.00611		3.91726	3.86174	3.86174		3.81665	3.76236	3.76236		3.70995	3.70995	3.69518		3.67683	3.65904	3.6774		3.70501	3.66843	3.63931		3.61128	3.59927	3.59645		3.67264	3.77356	3.76182		3.76289	3.76909	3.76909		3.85408	3.84136	3.81201
3.53522	4.42057	4.13665	4.00504		3.91836	3.86208	3.86208		3.81638	3.76242	3.76242		3.7114	3.7114	3.6957		3.67653	3.65865	3.67631		3.70632	3.66825	3.63936		3.61204	3.59948	3.59527		3.67204	3.77432	3.76171		3.76254	3.76871	3.76871		3.8541	3.84216	3.81291
3.54242	4.42125	4.1369	4.00401		3.91961	3.86274	3.86274		3.81609	3.76253	3.76253		3.71267	3.71267	3.69614		3.67623	3.65858	3.67554		3.70734	3.66781	3.63935		3.61272	3.59985	3.59431		3.67147	3.77488	3.76139		3.76217	3.76849	3.76849		3.85409	3.84297	3.81371
3.54962	4.42173	4.13711	4.00308		3.92087	3.86363	3.86363		3.81572	3.76266	3.76266		3.71377	3.71377	3.69645		3.6759	3.65883	3.67522		3.70811	3.66725	3.63926		3.6132	3.60033	3.59364		3.67094	3.77513	3.76092		3.76173	3.76845	3.76845		3.854	3.84369	3.81437
3.55682	4.42191	4.13718	4.0023		3.92202	3.86457	3.86457		3.81527	3.76275	3.76275		3.71466	3.71466	3.69662		3.6755	3.65931	3.67543		3.70871	3.66669	3.63911		3.61339	3.60081	3.59329		3.67051	3.77497	3.7604		3.76117	3.76853	3.76853		3.85382	3.84427	3.81482
3.56402	4.42171	4.13705	4.00171		3.92299	3.86549	3.86549		3.81482	3.76278	3.76278		3.71534	3.71534	3.69666		3.67507	3.65997	3.67609		3.70932	3.66622	3.63892		3.61324	3.60121	3.59324		3.67017	3.77442	3.75994		3.76044	3.76863	3.76863		3.85354	3.84467	3.815
3.57122	4.42111	4.13665	4.00131		3.9237	3.86629	3.86629		3.81443	3.76267	3.76267		3.71578	3.71578	3.69664		3.67469	3.66071	3.67709		3.71004	3.66592	3.63872		3.61273	3.60151	3.59344		3.66997	3.77356	3.75967		3.75955	3.76865	3.76865		3.85315	3.84489	3.81488
3.57842	4.42017	4.13599	4.00109		3.92412	3.86694	3.86694		3.81413	3.76239	3.76239		3.71597	3.71597	3.69667		3.67439	3.6615	3.67818		3.71091	3.6658	3.63853		3.61193	3.60175	3.59384		3.66987	3.77252	3.75963		3.75852	3.76853	3.76853		3.85268	3.84495	3.81447
3.58562	4.41895	4.1351	4.00098		3.92425	3.86741	3.86741		3.8139	3.76187	3.76187		3.71594	3.71594	3.69688		3.67424	3.66233	3.67918		3.71189	3.66583	3.63835		3.61094	3.602	3.5944		3.66987	3.77147	3.75984		3.75739	3.7683	3.7683		3.85211	3.8449	3.81383
3.59282	4.41763	4.13401	4.00093		3.92408	3.86761	3.86761		3.81373	3.76115	3.76115		3.7157	3.7157	3.69729		3.67425	3.66316	3.67988		3.71282	3.66596	3.63821		3.60988	3.6023	3.59504		3.66998	3.77061	3.76022		3.75621	3.76804	3.76804		3.85143	3.84481	3.81305
3.60002	4.41639	4.1328	4.00086		3.92363	3.86752	3.86752		3.81359	3.76031	3.76031		3.71524	3.71524	3.69788		3.67439	3.66399	3.68017		3.71354	3.66614	3.63812		3.60886	3.60267	3.59575		3.67023	3.77013	3.76061		3.75505	3.76787	3.76787		3.85066	3.84477	3.81224
3.60722	4.41537	4.13155	4.00074		3.92292	3.86714	3.86714		3.81345	3.75945	3.75945		3.71457	3.71457	3.6986		3.67469	3.66473	3.67996		3.71383	3.66633	3.63814		3.60801	3.60313	3.59652		3.67061	3.77009	3.7609		3.75402	3.76787	3.76787		3.84983	3.84482	3.81149
3.61442	4.41467	4.13038	4.00051		3.92198	3.86649	3.86649		3.81325	3.75866	3.75866		3.71374	3.71374	3.69937		3.67507	3.66531	3.67926		3.71358	3.66646	3.63826		3.60742	3.60368	3.59736		3.67109	3.77044	3.76097		3.7532	3.76809	3.76809		3.849	3.84499	3.81094
3.62162	4.41427	4.12935	4.00016		3.92086	3.86566	3.86566		3.81293	3.75803	3.75803		3.71284	3.71284	3.70013		3.67548	3.66566	3.67818		3.71278	3.66647	3.63849		3.60715	3.60433	3.59821		3.67156	3.77107	3.7608		3.75264	3.76856	3.76856		3.84822	3.84524	3.81066
3.62882	4.41414	4.12849	3.99975		3.91963	3.86472	3.86472		3.81248	3.75763	3.75763		3.71199	3.71199	3.70076		3.67584	3.66575	3.67694		3.71146	3.66632	3.6388		3.60723	3.60495	3.59901		3.67196	3.7718	3.76043		3.7523	3.76925	3.76925		3.84753	3.84552	3.81063
3.63602	4.41422	4.1278	3.99934		3.91834	3.86374	3.86374		3.81196	3.75751	3.75751		3.71128	3.71128	3.70113		3.67609	3.66557	3.67579		3.70974	3.66603	3.63919		3.60762	3.60543	3.59964		3.67224	3.77244	3.75994		3.75214	3.7701	3.7701		3.847	3.84573	3.81078
3.64322	4.41442	4.12732	3.99903		3.91707	3.86274	3.86274		3.81142	3.75771	3.75771		3.71074	3.71074	3.70111		3.67628	3.66519	3.67491		3.7078	3.66563	3.6396		3.60831	3.60568	3.60008		3.67239	3.77283	3.75945		3.75205	3.77097	3.77097		3.84664	3.84579	3.81096
3.65042	4.41467	4.127	3.99887		3.91595	3.86178	3.86178		3.81097	3.75818	3.75818		3.71041	3.71041	3.70069		3.67647	3.66471	3.67445		3.70579	3.66518	3.63997		3.60922	3.60563	3.60032		3.6724	3.77286	3.7591		3.75199	3.77175	3.77175		3.84646	3.84561	3.81106
3.65762	4.41487	4.12685	3.99889		3.91508	3.86089	3.86089		3.81062	3.75878	3.75878		3.71025	3.71025	3.69988		3.67673	3.66427	3.67444		3.70387	3.66476	3.64024		3.61028	3.60534	3.60036		3.67224	3.77251	3.75905		3.75189	3.77233	3.77233		3.84643	3.84519	3.81104
3.66482	4.41498	4.12682	3.99908		3.91447	3.86013	3.86013		3.81038	3.75935	3.75935		3.71023	3.71023	3.69876		3.67709	3.66401	3.67486		3.70212	3.66443	3.64035		3.61143	3.60484	3.60026		3.67192	3.77182	3.7594		3.7517	3.77266	3.77266		3.84648	3.84455	3.81094
3.67202	4.41502	4.12689	3.99943		3.91409	3.85954	3.85954		3.81025	3.7598	3.7598		3.71026	3.71026	3.69743		3.67752	3.66405	3.67566		3.70055	3.66425	3.64028		3.61258	3.60414	3.60008		3.67152	3.77092	3.76014		3.75147	3.77274	3.77274		3.84653	3.84379	3.81082
3.67922	4.41498	4.12708	3.99989		3.91384	3.8592	3.8592		3.81026	3.76005	3.76005		3.71022	3.71022	3.69598		3.67798	3.66439	3.67665		3.69917	3.66431	3.64003		3.6137	3.60331	3.59996		3.67115	3.76999	3.7612		3.75127	3.77259	3.77259		3.84647	3.84301	3.81073
3.68642	4.41489	4.12744	4.00046		3.91365	3.85914	3.85914		3.81039	3.76011	3.76011		3.71003	3.71003	3.69455		3.6784	3.66499	3.67766		3.6979	3.66462	3.63961		3.61472	3.60237	3.60001		3.67088	3.76917	3.76245		3.75122	3.77228	3.77228		3.84626	3.84237	3.8107
3.69362	4.41475	4.12797	4.00109		3.91346	3.85942	3.85942		3.81063	3.75998	3.75998		3.70969	3.70969	3.69329		3.6787	3.66571	3.67845		3.69676	3.66514	3.6391		3.61556	3.60143	3.60034		3.67076	3.76858	3.76374		3.75144	3.77188	3.77188		3.8459	3.84199	3.8108
3.70082	4.41454	4.12869	4.00174		3.91324	3.86011	3.86011		3.81092	3.75967	3.75967		3.70923	3.70923	3.69233		3.67879	3.66641	3.67886		3.69571	3.6658	3.63857		3.61617	3.60054	3.60095		3.67077	3.76829	3.76497		3.75202	3.77147	3.77147		3.84548	3.84199	3.81104
3.70802	4.41425	4.12958	4.0024		3.91294	3.86127	3.86127		3.8112	3.75925	3.75925		3.70877	3.70877	3.69174		3.67859	3.66694	3.67878		3.69479	3.6665	3.6381		3.6165	3.59975	3.60179		3.67088	3.7683	3.76601		3.75295	3.77112	3.77112		3.84508	3.84237	3.81145
3.71522	4.41383	4.13058	4.00306		3.91259	3.86285	3.86285		3.81144	3.75883	3.75883		3.70836	3.70836	3.69155		3.6781	3.66722	3.67823		3.69402	3.6671	3.63778		3.61654	3.59911	3.60277		3.67112	3.76853	3.76678		3.75414	3.77087	3.77087		3.84485	3.84305	3.81191
3.72242	4.41323	4.13164	4.00369		3.91225	3.86479	3.86479		3.81161	3.7585	3.7585		3.70808	3.70808	3.69173		3.67733	3.66721	3.67727		3.69344	3.66753	3.63765		3.6163	3.59866	3.60379		3.67146	3.76892	3.76724		3.75549	3.77073	3.77073		3.8449	3.8439	3.81233
3.72962	4.41243	4.13274	4.00425		3.91202	3.8669	3.8669		3.8117	3.75832	3.75832		3.70797	3.70797	3.69223		3.67638	3.66695	3.67603		3.69306	3.66767	3.63768		3.61584	3.59844	3.60473		3.67189	3.76932	3.76741		3.75682	3.77069	3.77069		3.84536	3.8448	3.81261
3.73682	4.41148	4.1338	4.00471		3.91199	3.86904	3.86904		3.81171	3.75831	3.75831		3.70805	3.70805	3.69291		3.67532	3.66657	3.67466		3.6929	3.6675	3.63786		3.61529	3.59849	3.60553		3.67235	3.76965	3.76734		3.75797	3.77068	3.77068		3.84623	3.84562	3.81275
3.74402	4.41049	4.1348	4.00502		3.91224	3.87104	3.87104		3.81163	3.75845	3.75845		3.70831	3.70831	3.69368		3.67423	3.66619	3.67332		3.69296	3.667	3.63817		3.61475	3.5988	3.60614		3.6728	3.76981	3.76713		3.75885	3.77066	3.77066		3.8475	3.84628	3.81284
3.75122	4.40955	4.13572	4.00519		3.91279	3.87274	3.87274		3.81156	3.75869	3.75869		3.70872	3.70872	3.69443		3.67312	3.66588	3.67213		3.69328	3.66628	3.63854		3.61438	3.59932	3.60655		3.67322	3.76977	3.76683		3.75938	3.77056	3.77056		3.84903	3.8467	3.81294
3.75842	4.40876	4.13651	4.00521		3.91358	3.874	3.874		3.81158	3.75901	3.75901		3.70923	3.70923	3.69509		3.67205	3.66567	3.67123		3.69385	3.66542	3.63892		3.61427	3.59996	3.60674		3.67364	3.76955	3.76651		3.75959	3.77038	3.77038		3.85068	3.84691	3.81315
3.76562	4.40816	4.13716	4.00515		3.91452	3.87475	3.87475		3.81176	3.75938	3.75938		3.70975	3.70975	3.69557		3.67104	3.66551	3.67069		3.69468	3.66454	3.63923		3.6145	3.60062	3.60674		3.67408	3.76919	3.76616		3.75952	3.77011	3.77011		3.85226	3.84691	3.81345
3.77282	4.40779	4.13763	4.00507		3.91551	3.87498	3.87498		3.81219	3.75978	3.75978		3.71027	3.71027	3.69585		3.67015	3.66538	3.67053		3.6957	3.66377	3.63943		3.61503	3.60121	3.60655		3.67457	3.76875	3.76573		3.75926	3.76981	3.76981		3.8536	3.84675	3.81384
3.78002	4.40769	4.13792	4.00506		3.91643	3.87475	3.87475		3.81289	3.76018	3.76018		3.7108	3.7108	3.69592		3.6694	3.66527	3.67066		3.69684	3.66319	3.63949		3.61574	3.60166	3.60619		3.67509	3.76832	3.76523		3.75893	3.76952	3.76952		3.85455	3.84647	3.81433
3.78722	4.40779	4.138	4.00521		3.91718	3.8742	3.8742		3.81387	3.76055	3.76055		3.71132	3.71132	3.6958		3.6688	3.66514	3.67102		3.69801	3.66285	3.63941		3.61651	3.60196	3.60566		3.67567	3.76792	3.76464		3.75862	3.76934	3.76934		3.85509	3.84607	3.81483
3.79442	4.40801	4.13784	4.00552		3.91768	3.87347	3.87347		3.81507	3.76092	3.76092		3.71183	3.71183	3.69555		3.66842	3.66498	3.67154		3.69911	3.66276	3.6392		3.61714	3.60209	3.60495		3.67627	3.76762	3.76397		3.75842	3.76935	3.76935		3.8552	3.84555	3.81525
3.80162	4.40822	4.1374	4.00594		3.91786	3.87272	3.87272		3.81637	3.7613	3.7613		3.71226	3.71226	3.69521		3.66828	3.66476	3.67218		3.70007	3.66284	3.6389		3.61751	3.60209	3.6041		3.67683	3.76743	3.76326		3.75839	3.76955	3.76955		3.85497	3.84489	3.81547
3.80882	4.40834	4.13666	4.00638		3.91771	3.87203	3.87203		3.81761	3.7617	3.7617		3.71253	3.71253	3.69482		3.66845	3.6645	3.67289		3.70085	3.66299	3.63853		3.61753	3.60201	3.60316		3.67724	3.76736	3.76254		3.75857	3.76993	3.76993		3.85445	3.8441	3.81537
3.81602	4.40836	4.1357	4.00668		3.91725	3.87148	3.87148		3.81863	3.7621	3.7621		3.71256	3.71256	3.6944		3.66893	3.66428	3.67361		3.70141	3.6631	3.63814		3.61719	3.60187	3.6022		3.67745	3.76737	3.76185		3.75896	3.77041	3.77041		3.85371	3.8432	3.81498
3.82322	4.4083	4.13457	4.00669		3.91655	3.87105	3.87105		3.8193	3.76244	3.76244		3.71231	3.71231	3.694		3.6697	3.66412	3.67424		3.70175	3.66307	3.63777		3.61656	3.60168	3.60132		3.67738	3.7674	3.76129		3.7595	3.77095	3.77095		3.85288	3.84224	3.81434
3.83042	4.4082	4.13339	4.00627		3.91572	3.87069	3.87069		3.81956	3.76263	3.76263		3.7118	3.7118	3.69372		3.67067	3.66401	3.67472		3.7019	3.66285	3.63746		3.61575	3.60144	3.60063		3.67699	3.76744	3.76092		3.76011	3.7715	3.7715		3.85206	3.84131	3.81357
3.83762	4.40807	4.13221	4.00531		3.91488	3.87029	3.87029		3.81932	3.76258	3.76258		3.71107	3.71107	3.69359		3.67172	3.66386	3.67501		3.70197	3.66247	3.63724		3.61493	3.60113	3.6002		3.67629	3.76748	3.7608		3.76066	3.77201	3.77201		3.85136	3.84051	3.81277
3.84482	4.40795	4.1311	4.00375		3.91411	3.86977	3.86977		3.81863	3.76225	3.76225		3.71018	3.71018	3.69366		3.67275	3.66365	3.67513		3.70203	3.66197	3.63711		3.61426	3.60072	3.6001		3.67531	3.76751	3.7609		3.76103	3.77246	3.77246		3.85079	3.83993	3.81204
3.85202	4.4079	4.13008	4.00159		3.91346	3.86904	3.86904		3.81755	3.76163	3.76163		3.70926	3.70926	3.69393		3.67364	3.66339	3.67506		3.70212	3.66142	3.63708		3.61388	3.60018	3.60025		3.67416	3.76755	3.76117		3.76109	3.77282	3.77282		3.85036	3.8396	3.81149
3.85922	4.40794	4.12915	3.99903		3.91299	3.86813	3.86813		3.81621	3.76074	3.76074		3.70845	3.70845	3.69442		3.67427	3.6631	3.67481		3.70225	3.66089	3.63712		3.61382	3.59951	3.60057		3.67302	3.76759	3.76155		3.76076	3.77308	3.77308		3.85004	3.83954	3.81116
3.86642	4.40804	4.1283	3.99629		3.9127	3.86711	3.86711		3.81476	3.75968	3.75968		3.70788	3.70788	3.6951		3.67455	3.66285	3.67445		3.70238	3.66042	3.63721		3.61406	3.59876	3.60096		3.67206	3.76764	3.76197		3.76002	3.77325	3.77325		3.84982	3.83971	3.81109
3.87362	4.40817	4.12751	3.99365		3.9126	3.86615	3.86615		3.81333	3.75856	3.75856		3.70767	3.70767	3.69595		3.67442	3.66265	3.67404		3.70247	3.66004	3.63736		3.6145	3.59796	3.60129		3.6714	3.7677	3.76236		3.75894	3.77334	3.77334		3.84973	3.84009	3.81121
3.88082	4.40823	4.12678	3.99136		3.91268	3.86543	3.86543		3.81209	3.75746	3.75746		3.70784	3.70784	3.69686		3.67392	3.66252	3.67366		3.70248	3.65975	3.63754		3.61508	3.59723	3.60152		3.67111	3.76775	3.76266		3.75761	3.77336	3.77336		3.84977	3.84061	3.81149
3.88802	4.40818	4.12611	3.98962		3.91285	3.86509	3.86509		3.81113	3.75648	3.75648		3.70837	3.70837	3.69774		3.67318	3.66248	3.67337		3.70236	3.65951	3.6378		3.61569	3.5966	3.60155		3.67118	3.76778	3.76276		3.7562	3.77328	3.77328		3.84993	3.84117	3.81185
3.89522	4.40801	4.12552	3.98859		3.91306	3.86519	3.86519		3.81057	3.75565	3.75565		3.70915	3.70915	3.69841		3.67236	3.66256	3.67317		3.70206	3.65925	3.63814		3.61623	3.59616	3.60137		3.67158	3.76778	3.76262		3.75488	3.77316	3.77316		3.85016	3.84167	3.81225
3.90242	4.4077	4.12508	3.98832		3.91325	3.86574	3.86574		3.81041	3.75495	3.75495		3.71003	3.71003	3.6988		3.67162	3.66274	3.67298		3.70154	3.65897	3.63855		3.61661	3.59592	3.60099		3.67222	3.76775	3.76222		3.75377	3.77305	3.77305		3.85043	3.84207	3.81267
3.90963	4.4073	4.12484	3.98873		3.91335	3.86665	3.86665		3.81063	3.75432	3.75432		3.71087	3.71087	3.69884		3.67108	3.66297	3.67277		3.7008	3.65869	3.63901		3.61677	3.59592	3.60054		3.67302	3.76769	3.76157		3.75293	3.77301	3.77301		3.85076	3.84234	3.8131
3.91683	4.40683	4.12489	3.98965		3.91338	3.86776	3.86776		3.81116	3.75368	3.75368		3.71158	3.71158	3.6985		3.67081	3.66318	3.67246		3.69989	3.65855	3.63948		3.61669	3.59612	3.60015		3.67383	3.7676	3.76073		3.75233	3.77314	3.77314		3.85119	3.84247	3.81356
3.92403	4.40636	4.12523	3.99085		3.91338	3.86885	3.86885		3.81193	3.75293	3.75293		3.71205	3.71205	3.6978		3.67085	3.66331	3.67203		3.69887	3.65861	3.63989		3.61638	3.59644	3.59994		3.67458	3.7675	3.75974		3.75192	3.77346	3.77346		3.85169	3.84243	3.81402
3.93123	4.40595	4.12581	3.99209		3.91335	3.86968	3.86968		3.81283	3.75203	3.75203		3.71225	3.71225	3.69681		3.67116	3.66329	3.67151		3.69782	3.65896	3.6402		3.61589	3.5968	3.59993		3.67519	3.76744	3.75866		3.75163	3.77396	3.77396		3.85225	3.84223	3.8145
3.93843	4.40569	4.12652	3.99324		3.91335	3.87006	3.87006		3.81373	3.75105	3.75105		3.71214	3.71214	3.69562		3.67164	3.66312	3.67098		3.69678	3.65958	3.64037		3.61527	3.59718	3.60013		3.67566	3.76742	3.75753		3.75147	3.77457	3.77457		3.85283	3.8419	3.81494
3.94563	4.40562	4.12727	3.99421		3.91343	3.86989	3.86989		3.81446	3.75008	3.75008		3.71178	3.71178	3.69437		3.67216	3.66278	3.67054		3.69582	3.6604	3.64035		3.61459	3.59758	3.60052		3.67603	3.76747	3.75645		3.75146	3.7752	3.7752		3.85337	3.84148	3.81532
3.95283	4.40578	4.12791	3.99501		3.9136	3.86918	3.86918		3.81495	3.74928	3.74928		3.71128	3.71128	3.69319		3.67256	3.66231	3.67029		3.69501	3.66133	3.64019		3.61392	3.59797	3.60108		3.67629	3.76759	3.75547		3.75162	3.77574	3.77574		3.85388	3.84104	3.81559
3.96003	4.40613	4.12835	3.99562		3.91392	3.868	3.868		3.81514	3.74881	3.74881		3.71078	3.71078	3.69219		3.67274	3.66176	3.67032		3.69432	3.66219	3.63993		3.61332	3.59839	3.60174		3.67647	3.76781	3.75465		3.75201	3.77607	3.77607		3.85432	3.84063	3.81575
3.96723	4.40667	4.12847	3.99612		3.91439	3.86652	3.86652		3.81508	3.74883	3.74883		3.71039	3.71039	3.69144		3.67268	3.66124	3.67066		3.69376	3.66284	3.6397		3.61287	3.59884	3.60242		3.67653	3.76819	3.75401		3.75264	3.77615	3.77615		3.85465	3.84032	3.81575
3.97443	4.40736	4.12819	3.99662		3.91496	3.86492	3.86492		3.81482	3.74945	3.74945		3.71018	3.71018	3.69098		3.67246	3.66081	3.67129		3.69329	3.66317	3.63958		3.61258	3.59935	3.60304		3.67645	3.76876	3.75354		3.75355	3.77595	3.77595		3.8548	3.84017	3.81562
3.98163	4.40816	4.12748	3.99715		3.91551	3.86341	3.86341		3.81438	3.75072	3.75072		3.71016	3.71016	3.69076		3.67217	3.66053	3.67216		3.69287	3.66313	3.63967		3.61248	3.59997	3.60358		3.6762	3.76952	3.75326		3.75469	3.7755	3.7755		3.85467	3.84019	3.81538
3.98883	4.40902	4.12638	3.99774		3.91595	3.86213	3.86213		3.81382	3.7526	3.7526		3.71029	3.71029	3.69076		3.67188	3.6604	3.67319		3.69247	3.66275	3.63996		3.61255	3.60067	3.604		3.67579	3.77041	3.75319		3.75593	3.77488	3.77488		3.85424	3.8404	3.81511
3.99603	4.40986	4.12501	3.9983		3.9162	3.86121	3.86121		3.81318	3.7549	3.7549		3.71054	3.71054	3.69095		3.67165	3.66037	3.67428		3.69203	3.66215	3.64041		3.61275	3.60142	3.60433		3.67523	3.77136	3.75336		3.7571	3.77415	3.77415		3.85351	3.84077	3.81494
4.00323	4.41061	4.12352	3.99873		3.91621	3.86067	3.86067		3.81252	3.75737	3.75737		3.71088	3.71088	3.69132		3.6715	3.66039	3.67536		3.69157	3.66149	3.64096		3.61309	3.60208	3.60456		3.6746	3.77231	3.75381		3.75801	3.7734	3.7734		3.85253	3.8413	3.81489
4.01043	4.41125	4.12206	3.99898		3.91598	3.8605	3.8605		3.81192	3.75978	3.75978		3.71121	3.71121	3.69179		3.67149	3.6604	3.67639		3.69111	3.66094	3.64149		3.61355	3.60253	3.60463		3.67398	3.77318	3.75453		3.75853	3.77269	3.77269		3.85136	3.84198	3.81498
4.01763	4.41171	4.12079	3.99902		3.91554	3.86058	3.86058		3.81141	3.7619	3.7619		3.71147	3.71147	3.69234		3.67161	3.66035	3.67739		3.69073	3.66061	3.64192		3.61412	3.6027	3.60447		3.67352	3.77392	3.75555		3.75862	3.77204	3.77204		3.8501	3.84275	3.81519
4.02483	4.41194	4.11985	3.99888		3.9149	3.86083	3.86083		3.81103	3.76353	3.76353		3.71163	3.71163	3.69291		3.67183	3.66022	3.67836		3.69053	3.66052	3.64216		3.61478	3.60252	3.60404		3.67331	3.77445	3.75684		3.75829	3.77148	3.77148		3.84883	3.84355	3.81551
4.03203	4.41188	4.11939	3.99857		3.91415	3.86111	3.86111		3.81078	3.76457	3.76457		3.71171	3.71171	3.69344		3.6721	3.66004	3.6793		3.69056	3.66058	3.6422		3.61549	3.60199	3.60329		3.67342	3.77473	3.75841		3.75761	3.771	3.771		3.84765	3.84431	3.81588
4.03923	4.41147	4.11949	3.99815		3.91337	3.86132	3.86132		3.81066	3.76498	3.76498		3.71175	3.71175	3.69393		3.67237	3.65989	3.68019		3.69086	3.66072	3.64209		3.61623	3.60115	3.60222		3.67384	3.77476	3.76015		3.75673	3.77061	3.77061		3.84666	3.845	3.81625
4.04643	4.41072	4.12016	3.99768		3.91263	3.86143	3.86143		3.81066	3.76481	3.76481		3.71174	3.71174	3.69435		3.67264	3.65989	3.68097		3.69143	3.66082	3.64197		3.61694	3.6001	3.60089		3.6745	3.77461	3.76195		3.75578	3.77035	3.77035		3.84589	3.84555	3.81655
4.05363	4.40964	4.12134	3.99724		3.912	3.86148	3.86148		3.81079	3.7642	3.7642		3.71168	3.71168	3.69474		3.67294	3.66014	3.68157		3.69225	3.6608	3.64197		3.61753	3.59899	3.59939		3.67529	3.77437	3.76366		3.75492	3.77026	3.77026		3.84533	3.84594	3.81669
4.06083	4.40831	4.12291	3.99691		3.9115	3.86155	3.86155		3.81101	3.76331	3.76331		3.71157	3.71157	3.69508		3.67327	3.66068	3.68198		3.69323	3.66059	3.64217		3.61792	3.598	3.59787		3.67607	3.77414	3.76513		3.75427	3.77039	3.77039		3.84492	3.84607	3.81666
4.06803	4.40681	4.12469	3.9967		3.91111	3.86172	3.86172		3.81127	3.76228	3.76228		3.71137	3.71137	3.69539		3.67363	3.66147	3.68219		3.69428	3.66015	3.64259		3.61806	3.59727	3.5965		3.67667	3.77397	3.76622		3.75387	3.77071	3.77071		3.84463	3.84595	3.81646
4.07523	4.40525	4.12649	3.99656		3.91083	3.86201	3.86201		3.81148	3.76124	3.76124		3.71107	3.71107	3.69566		3.67399	3.66244	3.68223		3.69526	3.65955	3.64324		3.61791	3.5969	3.59542		3.67696	3.77385	3.76684		3.75375	3.7712	3.7712		3.84445	3.84559	3.81609
4.08243	4.40371	4.12816	3.99644		3.91064	3.86244	3.86244		3.81151	3.76024	3.76024		3.71066	3.71066	3.69593		3.67434	3.66343	3.68209		3.69606	3.65887	3.64406		3.61752	3.59693	3.59476		3.67687	3.77375	3.76695		3.75387	3.77176	3.77176		3.84438	3.84507	3.81554
4.08963	4.40224	4.12959	3.99631		3.91051	3.86298	3.86298		3.81131	3.75932	3.75932		3.71016	3.71016	3.69619		3.67466	3.66428	3.68181		3.69667	3.65825	3.64493		3.61693	3.59731	3.59451		3.67643	3.77364	3.76658		3.75417	3.77229	3.77229		3.84442	3.84448	3.81481
4.09683	4.40091	4.13066	3.99618		3.91039	3.8636	3.8636		3.81085	3.75847	3.75847		3.70961	3.70961	3.69638		3.67492	3.66487	3.68142		3.69712	3.65778	3.64569		3.61626	3.59792	3.59461		3.67568	3.77347	3.76579		3.75448	3.77273	3.77273		3.84458	3.84389	3.81389
4.10403	4.39975	4.13134	3.99609		3.9102	3.86426	3.86426		3.81019	3.7577	3.7577		3.70907	3.70907	3.69645		3.67509	3.66508	3.68097		3.69746	3.65754	3.64618		3.61558	3.59866	3.59495		3.67478	3.77318	3.76469		3.75468	3.77296	3.77296		3.84483	3.84334	3.8128
4.11123	4.39875	4.13162	3.99609		3.90989	3.86491	3.86491		3.80939	3.757	3.757		3.7086	3.7086	3.69635		3.67512	3.66491	3.68049		3.69772	3.65756	3.64632		3.61504	3.5994	3.59535		3.67385	3.77268	3.76342		3.75465	3.7729	3.7729		3.84519	3.84291	3.81152
4.11843	4.39791	4.13158	3.99618		3.9094	3.86546	3.86546		3.80852	3.75642	3.75642		3.70829	3.70829	3.69604		3.67499	3.66442	3.67999		3.69795	3.65787	3.64611		3.61472	3.60001	3.59566		3.67303	3.77192	3.7621		3.75431	3.77249	3.77249		3.84564	3.84261	3.81007
4.12563	4.39721	4.1313	3.99632		3.90876	3.86591	3.86591		3.80766	3.75599	3.75599		3.70814	3.70814	3.69558		3.67466	3.66376	3.67947		3.69819	3.65844	3.64563		3.61469	3.60039	3.59577		3.67247	3.77095	3.76082		3.75367	3.77175	3.77175		3.84619	3.84244	3.80853
4.13283	4.39666	4.13089	3.9965		3.908	3.86629	3.86629		3.80694	3.75572	3.75572		3.70819	3.70819	3.69502		3.67412	3.66307	3.6789		3.69849	3.65922	3.64497		3.61498	3.60047	3.59564		3.67221	3.76986	3.75966		3.75272	3.77079	3.77079		3.84682	3.84232	3.80703
4.14003	4.3963	4.13039	3.9967		3.90721	3.86665	3.86665		3.80648	3.75563	3.75563		3.70845	3.70845	3.69442		3.67337	3.66251	3.67835		3.6988	3.66011	3.64424		3.61556	3.60025	3.59529		3.67226	3.76877	3.75865		3.75155	3.76974	3.76974		3.8475	3.84222	3.80573
4.14723	4.39614	4.12983	3.99687		3.90647	3.86705	3.86705		3.80639	3.75569	3.75569		3.70888	3.70888	3.69383		3.67248	3.66215	3.67787		3.69902	3.66102	3.64353		3.61636	3.5998	3.5948		3.67255	3.76776	3.75777		3.7503	3.76872	3.76872		3.84821	3.84206	3.80482
4.15443	4.39617	4.12923	3.99701		3.90592	3.86747	3.86747		3.80672	3.75589	3.75589		3.70944	3.70944	3.69329		3.6715	3.66201	3.67752		3.69903	3.66188	3.64296		3.61732	3.59929	3.59433		3.67303	3.76694	3.75708		3.74917	3.76789	3.76789		3.84894	3.84184	3.80443
4.16163	4.39634	4.12861	3.99709		3.90567	3.86786	3.86786		3.80742	3.75616	3.75616		3.71007	3.71007	3.69287		3.67052	3.66206	3.67731		3.69875	3.6626	3.64261		3.61835	3.5988	3.59397		3.67358	3.76638	3.75662		3.7484	3.76732	3.76732		3.84967	3.84161	3.80468
4.16883	4.3966	4.128	3.99713		3.90581	3.86813	3.86813		3.80837	3.75646	3.75646		3.71072	3.71072	3.69262		3.66961	3.66225	3.67722		3.69815	3.66313	3.64247		3.61937	3.59844	3.5938		3.67411	3.76616	3.75641		3.74815	3.76708	3.76708		3.85034	3.84139	3.80562
4.17603	4.39686	4.1274	3.99721		3.90636	3.86822	3.86822		3.80945	3.75669	3.75669		3.71132	3.71132	3.69252		3.66886	3.66248	3.67718		3.69728	3.66339	3.64248		3.6203	3.5983	3.59385		3.67454	3.76632	3.7565		3.74846	3.76721	3.76721		3.85087	3.84122	3.80726
4.18323	4.39702	4.12675	3.99747		3.90728	3.86804	3.86804		3.81053	3.75682	3.75682		3.71183	3.71183	3.69255		3.6683	3.66266	3.67717		3.69619	3.66337	3.64255		3.62105	3.59843	3.5941		3.67481	3.7668	3.75686		3.74932	3.76765	3.76765		3.85121	3.84109	3.80945
4.19043	4.39693	4.126	3.99798		3.90846	3.86761	3.86761		3.81151	3.7568	3.7568		3.71218	3.71218	3.69265		3.66797	3.66272	3.67712		3.69494	3.6631	3.64264		3.62158	3.59883	3.5945		3.67493	3.76751	3.75746		3.75059	3.76824	3.76824		3.85128	3.84103	3.81195
4.19763	4.3965	4.12509	3.99876		3.90977	3.86692	3.86692		3.81229	3.75666	3.75666		3.71237	3.71237	3.69279		3.66786	3.66262	3.67699		3.69365	3.66264	3.64266		3.62186	3.59948	3.59493		3.67489	3.76834	3.75824		3.75206	3.76887	3.76887		3.85109	3.84104	3.81449
4.20483	4.39571	4.12402	3.99973		3.91111	3.86603	3.86603		3.81278	3.75641	3.75641		3.71238	3.71238	3.69297		3.6679	3.66235	3.67669		3.69245	3.66207	3.64261		3.62192	3.6002	3.59527		3.67478	3.76921	3.75902		3.7535	3.76941	3.76941		3.85069	3.84112	3.8168
4.21203	4.39466	4.12276	4.00078		3.91234	3.86504	3.86504		3.81292	3.75611	3.75611		3.71224	3.71224	3.69318		3.66805	3.66198	3.6762		3.69149	3.66151	3.64243		3.62181	3.60086	3.59543		3.67463	3.77004	3.75967		3.75463	3.76977	3.76977		3.85014	3.84123	3.81867
4.21923	4.39343	4.12133	4.00182		3.91337	3.86401	3.86401		3.81272	3.75575	3.75575		3.71195	3.71195	3.69343		3.66835	3.66156	3.67551		3.69084	3.66101	3.64211		3.62162	3.60131	3.59538		3.67446	3.77074	3.76008		3.7553	3.76993	3.76993		3.84957	3.84137	3.81995
4.22643	4.39218	4.11977	4.00274		3.91408	3.86307	3.86307		3.81228	3.75541	3.75541		3.71155	3.71155	3.69372		3.66878	3.66118	3.67469		3.69052	3.66064	3.64167		3.62139	3.60148	3.59514		3.67427	3.77125	3.76021		3.7554	3.76988	3.76988		3.8491	3.8415	3.82054
4.23363	4.39102	4.11813	4.00343		3.91445	3.86227	3.86227		3.8117	3.75513	3.75513		3.71105	3.71105	3.69409		3.66938	3.66094	3.6738		3.69051	3.66047	3.64121		3.62113	3.60134	3.59479		3.67404	3.77156	3.76008		3.755	3.76965	3.76965		3.8488	3.84161	3.82043
4.24083	4.39012	4.11656	4.00377		3.91446	3.86165	3.86165		3.81107	3.755	3.755		3.71051	3.71051	3.69453		3.67014	3.66086	3.67293		3.69076	3.66057	3.64081		3.62085	3.60093	3.59431		3.67374	3.77171	3.75975		3.75422	3.76936	3.76936		3.8487	3.84168	3.81968
4.24803	4.38964	4.11521	4.0037		3.91414	3.86118	3.86118		3.81044	3.75504	3.75504		3.70998	3.70998	3.69501		3.67108	3.66101	3.67216		3.69129	3.66095	3.64055		3.62056	3.60022	3.59372		3.67338	3.77179	3.75935		3.75329	3.76909	3.76909		3.84874	3.84173	3.81849
4.25523	4.38961	4.11416	4.00323		3.9135	3.86081	3.86081		3.80986	3.75525	3.75525		3.70949	3.70949	3.69549		3.67217	3.66131	3.67153		3.69204	3.6616	3.64043		3.62024	3.59931	3.59307		3.67298	3.77184	3.75904		3.75242	3.76893	3.76893		3.84886	3.84175	3.81708
4.26243	4.39	4.11345	4.00246		3.9126	3.8605	3.8605		3.80934	3.7556	3.7556		3.70905	3.70905	3.69592		3.67333	3.66174	3.67107		3.69296	3.66243	3.64043		3.61989	3.59827	3.5924		3.67255	3.77188	3.75896		3.75177	3.76891	3.76891		3.84897	3.8417	3.81568
4.26963	4.39069	4.11311	4.00145		3.91154	3.86025	3.86025		3.80894	3.75603	3.75603		3.7087	3.7087	3.69623		3.67442	3.66222	3.67082		3.69397	3.66336	3.64052		3.61946	3.59722	3.59176		3.67215	3.77197	3.75922		3.7514	3.76906	3.76906		3.84895	3.84157	3.81444
4.27683	4.39155	4.11308	4.0003		3.91044	3.86007	3.86007		3.80867	3.75651	3.75651		3.70849	3.70849	3.69633		3.67529	3.66271	3.67078		3.69498	3.66426	3.64068		3.61899	3.59623	3.59117		3.67182	3.77214	3.75979		3.75131	3.76931	3.76931		3.84871	3.84133	3.81346
4.28403	4.39246	4.11333	3.99908		3.90942	3.86002	3.86002		3.80852	3.75695	3.75695		3.70844	3.70844	3.69616		3.67585	3.66312	3.6709		3.69592	3.66502	3.64085		3.61852	3.59538	3.59066		3.67166	3.77247	3.76058		3.75147	3.76964	3.76964		3.84822	3.841	3.81281
4.29123	4.39332	4.11382	3.99792		3.90857	3.8601	3.8601		3.80841	3.75732	3.75732		3.70858	3.70858	3.69568		3.67604	3.66337	3.6711		3.69675	3.66552	3.64094		3.61814	3.59472	3.59025		3.67168	3.77298	3.76146		3.75177	3.76996	3.76996		3.84753	3.84059	3.81249
4.29843	4.39402	4.1145	3.99692		3.90796	3.86031	3.86031		3.80828	3.75754	3.75754		3.70889	3.70889	3.69493		3.6759	3.66343	3.67134		3.69744	3.66569	3.64087		3.61788	3.59433	3.59008		3.67189	3.77361	3.76232		3.75209	3.77018	3.77018		3.84677	3.84012	3.81245
4.30563	4.39444	4.11534	3.99622		3.90763	3.8606	3.8606		3.80806	3.75759	3.75759		3.70929	3.70929	3.69401		3.67547	3.66333	3.67154		3.69794	3.6655	3.64062		3.61767	3.5943	3.59023		3.67221	3.77427	3.76309		3.75232	3.77024	3.77024		3.84609	3.83965	3.81255
4.31283	4.39458	4.11632	3.99588		3.90759	3.86096	3.86096		3.80772	3.75749	3.75749		3.70969	3.70969	3.69302		3.67485	3.66311	3.67173		3.69825	3.66501	3.64023		3.61744	3.59467	3.59074		3.67258	3.77486	3.76371		3.75238	3.77006	3.77006		3.84557	3.83922	3.81261
4.32003	4.39445	4.11741	3.9959		3.90776	3.86134	3.86134		3.80719	3.75734	3.75734		3.70997	3.70997	3.69207		3.67413	3.66282	3.67188		3.69841	3.66432	3.63979		3.61713	3.59542	3.5916		3.67291	3.77531	3.76419		3.75226	3.76964	3.76964		3.84525	3.8389	3.81249
4.32723	4.39411	4.11859	3.99624		3.90805	3.86167	3.86167		3.80647	3.75721	3.75721		3.71008	3.71008	3.69126		3.67342	3.6625	3.67202		3.69847	3.66361	3.63937		3.61672	3.59649	3.59272		3.6732	3.77554	3.76454		3.75203	3.76902	3.76902		3.84511	3.83871	3.81213
4.33443	4.39361	4.1198	3.99676		3.90838	3.8619	3.8619		3.80556	3.75718	3.75718		3.70997	3.70997	3.69066		3.67277	3.66216	3.67215		3.69852	3.663	3.63898		3.61619	3.59772	3.59403		3.67343	3.77547	3.76482		3.75173	3.76828	3.76828		3.84513	3.83868	3.81153
4.34163	4.39302	4.12099	3.99733		3.90869	3.86201	3.86201		3.80455	3.75727	3.75727		3.70967	3.70967	3.69036		3.67224	3.66187	3.67228		3.69861	3.66259	3.63863		3.61555	3.59895	3.5955		3.67359	3.77504	3.76509		3.75143	3.76754	3.76754		3.84527	3.8388	3.81077
4.34883	4.39241	4.12204	3.99777		3.90896	3.86199	3.86199		3.8036	3.75749	3.75749		3.70924	3.70924	3.69034		3.67178	3.6617	3.67246		3.69877	3.66243	3.63832		3.61486	3.60001	3.59705		3.67369	3.77429	3.7654		3.75118	3.76688	3.76688		3.84548	3.83906	3.80991
4.35603	4.3918	4.12283	3.99793		3.90922	3.86194	3.86194		3.80282	3.75779	3.75779		3.70883	3.70883	3.69064		3.67135	3.66167	3.67272		3.69901	3.66244	3.63809		3.61421	3.60075	3.59859		3.67377	3.77335	3.76576		3.75101	3.76639	3.76639		3.84566	3.83943	3.80908
4.36323	4.39122	4.12325	3.99774		3.90953	3.8619	3.8619		3.80234	3.75808	3.75808		3.70856	3.70856	3.69121		3.67094	3.66178	3.67311		3.69933	3.66253	3.63797		3.61373	3.60106	3.60004		3.67386	3.77235	3.76613		3.75103	3.76617	3.76617		3.84574	3.83983	3.80836
4.37043	4.39065	4.12325	3.99718		3.90995	3.86192	3.86192		3.80222	3.75828	3.75828		3.70856	3.70856	3.69197		3.67052	3.66197	3.67362		3.69968	3.66253	3.63795		3.61356	3.60093	3.60131		3.67398	3.77142	3.76647		3.75131	3.76625	3.76625		3.84576	3.84014	3.80784
4.37763	4.39007	4.12284	3.99632		3.91053	3.86202	3.86202		3.80251	3.75827	3.75827		3.70892	3.70892	3.69285		3.67013	3.66219	3.67426		3.70004	3.66236	3.63803		3.61369	3.60042	3.60237		3.67409	3.77065	3.76672		3.75186	3.76667	3.76667		3.8458	3.84031	3.80755
4.38483	4.38952	4.12211	3.99529		3.9113	3.86217	3.86217		3.80319	3.75799	3.75799		3.70962	3.70962	3.69375		3.6698	3.6624	3.67497		3.70035	3.66196	3.63821		3.61408	3.59972	3.6032		3.6742	3.77011	3.76683		3.75262	3.76738	3.76738		3.84597	3.84034	3.80749
4.39203	4.38903	4.12116	3.99424		3.91223	3.86233	3.86233		3.80424	3.75739	3.75739		3.71056	3.71056	3.6946		3.66953	3.66253	3.6757		3.70057	3.66139	3.63851		3.6146	3.59897	3.6038		3.6743	3.76989	3.76681		3.75353	3.76828	3.76828		3.84637	3.8403	3.80764
4.39923	4.38859	4.12008	3.99337		3.91317	3.86242	3.86242		3.80549	3.75652	3.75652		3.71159	3.71159	3.6953		3.66933	3.66256	3.6764		3.70069	3.66077	3.63894		3.61513	3.59833	3.60414		3.67443	3.76996	3.76668		3.7545	3.76927	3.76927		3.84704	3.84026	3.8079
4.40643	4.3882	4.11903	3.99276		3.91397	3.86235	3.86235		3.80684	3.75543	3.75543		3.71256	3.71256	3.69577		3.66914	3.66242	3.677		3.70072	3.66022	3.63947		3.61558	3.5979	3.6042		3.67464	3.77028	3.76647		3.75546	3.77026	3.77026		3.848	3.84027	3.80821
4.41363	4.3879	4.11815	3.99247		3.91448	3.86207	3.86207		3.80815	3.75423	3.75423		3.71338	3.71338	3.69588		3.66894	3.66212	3.67741		3.70067	3.65986	3.63999		3.6159	3.59774	3.60397		3.67498	3.77071	3.76618		3.75631	3.77119	3.77119		3.84923	3.84037	3.80848
4.42083	4.38778	4.11755	3.99248		3.91452	3.86157	3.86157		3.80933	3.75305	3.75305		3.71398	3.71398	3.6956		3.66867	3.66169	3.67753		3.7006	3.65975	3.6404		3.61609	3.59785	3.6035		3.67549	3.77114	3.7658		3.75692	3.77195	3.77195		3.85066	3.84063	3.80877
4.42803	4.3879	4.1173	3.99275		3.91406	3.86086	3.86086		3.8103	3.75198	3.75198		3.71435	3.71435	3.69495		3.6683	3.66122	3.6773		3.70057	3.65988	3.64055		3.61612	3.59814	3.60284		3.67616	3.77149	3.76533		3.75714	3.7725	3.7725		3.85221	3.84104	3.80912
4.43523	4.38828	4.11738	3.99326		3.91311	3.86	3.86		3.81098	3.75108	3.75108		3.71449	3.71449	3.69402		3.66783	3.66077	3.67672		3.70067	3.66017	3.64037		3.61603	3.59851	3.60207		3.677	3.7717	3.7648		3.75695	3.7728	3.7728		3.85373	3.84162	3.80957
4.44243	4.38885	4.11777	3.99393		3.91178	3.85906	3.85906		3.81135	3.75038	3.75038		3.71444	3.71444	3.69293		3.66721	3.66042	3.67588		3.70091	3.66048	3.63981		3.61583	3.59886	3.60125		3.67796	3.7717	3.76422		3.75639	3.77285	3.77285		3.85507	3.84228	3.81007
4.44963	4.38952	4.11839	3.99469		3.91023	3.85813	3.85813		3.81137	3.74988	3.74988		3.71422	3.71422	3.69179		3.66646	3.6602	3.67488		3.70128	3.66067	3.63888		3.61555	3.59911	3.60038		3.67895	3.77149	3.7636		3.75559	3.77272	3.77272		3.85605	3.84295	3.81057
4.45683	4.39023	4.11916	3.99546		3.90871	3.85728	3.85728		3.8111	3.74957	3.74957		3.71383	3.71383	3.69067		3.66566	3.66011	3.67383		3.70175	3.66063	3.6377		3.61521	3.59926	3.59953		3.67988	3.77108	3.76293		3.75463	3.77249	3.77249		3.85661	3.84357	3.81103
4.46403	4.3909	4.11996	3.99621		3.90741	3.85657	3.85657		3.81065	3.74939	3.74939		3.71326	3.71326	3.68966		3.66492	3.66014	3.67286		3.70227	3.66032	3.6364		3.61481	3.59933	3.59871		3.68069	3.77055	3.76223		3.75361	3.77222	3.77222		3.85672	3.84413	3.81142
4.47123	4.39143	4.12071	3.99691		3.90648	3.85606	3.85606		3.81011	3.74932	3.74932		3.71247	3.71247	3.68881		3.66433	3.66024	3.67202		3.70277	3.65976	3.63516		3.6143	3.59935	3.59797		3.68133	3.76998	3.76157		3.75261	3.77197	3.77197		3.85644	3.84468	3.81175
4.47843	4.39173	4.12129	3.99753		3.90598	3.85578	3.85578		3.80957	3.74928	3.74928		3.71147	3.71147	3.6881		3.66398	3.66037	3.67135		3.70318	3.65909	3.63417		3.61369	3.59935	3.59736		3.68181	3.76947	3.76105		3.75174	3.77182	3.77182		3.85583	3.84524	3.81196
4.48563	4.39171	4.12161	3.99799		3.90587	3.85574	3.85574		3.80907	3.74925	3.74925		3.71028	3.71028	3.68753		3.66386	3.66052	3.67088		3.70339	3.65842	3.63358		3.613	3.59935	3.59692		3.68215	3.76908	3.76074		3.75105	3.77182	3.77182		3.85501	3.84588	3.81196
4.49283	4.39137	4.1216	3.9982		3.90609	3.8559	3.8559		3.80865	3.74922	3.74922		3.70897	3.70897	3.68703		3.66398	3.6607	3.67057		3.70333	3.65784	3.63351		3.61232	3.59941	3.59672		3.68237	3.76886	3.7607		3.75055	3.77202	3.77202		3.8541	3.84658	3.81178
4.50003	4.39075	4.12121	3.99809		3.90646	3.85617	3.85617		3.80834	3.7492	3.7492		3.70765	3.70765	3.68659		3.66433	3.66092	3.67038		3.70297	3.65739	3.63393		3.61177	3.59954	3.59678		3.68249	3.7688	3.7609		3.75018	3.77241	3.77241		3.85327	3.84732	3.8115
4.50723	4.38995	4.12043	3.99765		3.90684	3.85647	3.85647		3.80815	3.74922	3.74922		3.70645	3.70645	3.68623		3.66486	3.66119	3.67024		3.70238	3.65705	3.63475		3.61143	3.59975	3.59709		3.68253	3.76887	3.76129		3.74987	3.77296	3.77296		3.85263	3.848	3.81126
4.51443	4.38904	4.11929	3.99685		3.90705	3.85674	3.85674		3.80806	3.74931	3.74931		3.70546	3.70546	3.68596		3.66552	3.66148	3.67009		3.70164	3.65681	3.63577		3.61132	3.6	3.59761		3.68247	3.76902	3.76176		3.74957	3.77361	3.77361		3.85225	3.84852	3.81113
4.52163	4.38809	4.11782	3.99572		3.90705	3.85692	3.85692		3.80801	3.74948	3.74948		3.70474	3.70474	3.68585		3.66623	3.66177	3.66994		3.70081	3.65661	3.63681		3.61147	3.60028	3.59827		3.6823	3.76919	3.76221		3.74926	3.77433	3.77433		3.85215	3.84879	3.81112
4.52883	4.38716	4.11607	3.99433		3.90685	3.857	3.857		3.80796	3.74976	3.74976		3.70427	3.70427	3.68588		3.66691	3.66196	3.66984		3.69996	3.65643	3.63774		3.61187	3.60058	3.59896		3.68203	3.76938	3.76248		3.74893	3.77509	3.77509		3.85233	3.84874	3.81119
4.53603	4.38628	4.11414	3.9928		3.90648	3.85694	3.85694		3.80786	3.75013	3.75013		3.70402	3.70402	3.68605		3.6675	3.66201	3.66982		3.69912	3.65629	3.63845		3.61251	3.60087	3.59958		3.68167	3.76958	3.76244		3.74857	3.77586	3.77586		3.85273	3.84841	3.81137
4.54323	4.38547	4.11219	3.99127		3.90602	3.85678	3.85678		3.80774	3.75054	3.75054		3.70395	3.70395	3.68635		3.66803	3.6619	3.66994		3.69834	3.65623	3.63884		3.61331	3.60113	3.60003		3.68126	3.76977	3.76204		3.74821	3.7766	3.7766		3.85329	3.84786	3.81169
4.55043	4.38472	4.11039	3.98991		3.90558	3.85658	3.85658		3.8076	3.75093	3.75093		3.70401	3.70401	3.68676		3.66849	3.66163	3.67022		3.69766	3.6563	3.63891		3.61421	3.60131	3.60018		3.68085	3.76994	3.76124		3.7479	3.77724	3.77724		3.85391	3.84721	3.81218
4.55763	4.38402	4.10888	3.98881		3.90527	3.85644	3.85644		3.80746	3.75129	3.75129		3.70419	3.70419	3.68723		3.66889	3.66125	3.67069		3.69709	3.65655	3.63872		3.61515	3.60138	3.60007		3.68046	3.7701	3.76016		3.7477	3.77769	3.77769		3.85448	3.84658	3.8128
4.56483	4.38334	4.10774	3.98805		3.90516	3.85643	3.85643		3.80726	3.75161	3.75161		3.70446	3.70446	3.68772		3.66918	3.66084	3.67131		3.69655	3.65701	3.63842		3.61607	3.60135	3.59973		3.68006	3.77025	3.75893		3.74764	3.77792	3.77792		3.85495	3.84611	3.81352
4.57203	4.38267	4.107	3.98765		3.90529	3.85654	3.85654		3.80698	3.7519	3.7519		3.70481	3.70481	3.68818		3.66935	3.66052	3.67206		3.69604	3.6577	3.63817		3.61695	3.60124	3.5993		3.67966	3.7704	3.75775		3.74773	3.77792	3.77792		3.85527	3.84593	3.81429
4.57923	4.382	4.10669	3.98757		3.90563	3.85674	3.85674		3.80659	3.75216	3.75216		3.70523	3.70523	3.68861		3.66939	3.6604	3.67283		3.69557	3.65856	3.63806		3.61773	3.60109	3.59889		3.6792	3.77049	3.75684		3.74797	3.77769	3.77769		3.85545	3.84603	3.81512
4.58643	4.38132	4.10677	3.98776		3.90615	3.85696	3.85696		3.80605	3.75239	3.75239		3.7057	3.7057	3.68902		3.66929	3.66058	3.67356		3.69521	3.6595	3.63812		3.61837	3.60096	3.59859		3.67865	3.77047	3.75636		3.74836	3.7773	3.7773		3.85548	3.84637	3.816
4.59363	4.38068	4.10716	3.98806		3.90679	3.85718	3.85718		3.80541	3.75263	3.75263		3.7062	3.7062	3.68942		3.66907	3.66107	3.6742		3.69503	3.66037	3.6383		3.61885	3.60094	3.59844		3.67796	3.77031	3.75636		3.74892	3.77682	3.77682		3.85541	3.84676	3.81685
4.60083	4.38013	4.10773	3.98837		3.90749	3.8574	3.8574		3.80468	3.75293	3.75293		3.70664	3.70664	3.68981		3.66874	3.66179	3.67469		3.6951	3.66101	3.63861		3.61915	3.60109	3.59843		3.6771	3.77002	3.75681		3.74958	3.77637	3.77637		3.85534	3.84708	3.8176
4.60803	4.37971	4.10836	3.9886		3.90818	3.85762	3.85762		3.80394	3.75332	3.75332		3.70692	3.70692	3.69015		3.66839	3.66261	3.67503		3.69543	3.66136	3.639		3.61929	3.60143	3.5985		3.67611	3.76966	3.75759		3.75033	3.77607	3.77607		3.85537	3.84719	3.81815
4.61523	4.37943	4.10898	3.98874		3.90878	3.85785	3.85785		3.80328	3.75376	3.75376		3.70698	3.70698	3.69037		3.66808	3.66341	3.67519		3.69602	3.66139	3.63942		3.61925	3.60196	3.59856		3.67505	3.76923	3.75857		3.75113	3.77604	3.77604		3.85562	3.84701	3.81845
4.62243	4.37928	4.10954	3.98877		3.90927	3.85812	3.85812		3.80279	3.75422	3.75422		3.70681	3.70681	3.69046		3.66793	3.66411	3.67518		3.69686	3.6611	3.63979		3.61905	3.60261	3.59853		3.67401	3.76873	3.75953		3.75196	3.77634	3.77634		3.85612	3.84649	3.81847
4.62963	4.37924	4.11006	3.98873		3.90964	3.85849	3.85849		3.80254	3.75467	3.75467		3.70644	3.70644	3.69038		3.668	3.66464	3.67501		3.69792	3.66054	3.64001		3.61869	3.60326	3.59834		3.67312	3.76816	3.76031		3.75274	3.77689	3.77689		3.85681	3.84563	3.81825
4.63683	4.37926	4.1105	3.98867		3.90987	3.85901	3.85901		3.80257	3.75514	3.75514		3.70595	3.70595	3.69013		3.66834	3.665	3.67467		3.69914	3.65973	3.64006		3.61823	3.60382	3.59799		3.67246	3.76758	3.76072		3.75342	3.77753	3.77753		3.85761	3.84451	3.81787
4.64403	4.37933	4.11091	3.98864		3.90995	3.85963	3.85963		3.80284	3.75568	3.75568		3.70542	3.70542	3.68972		3.6689	3.66517	3.67419		3.70041	3.65875	3.63989		3.61769	3.60415	3.59751		3.67209	3.76706	3.7607		3.75397	3.77809	3.77809		3.85841	3.84327	3.81742
4.65123	4.37943	4.11135	3.98871		3.90986	3.86032	3.86032		3.80329	3.75631	3.75631		3.70491	3.70491	3.68922		3.6696	3.66518	3.67362		3.70159	3.65776	3.63953		3.61704	3.60422	3.59699		3.67202	3.76659	3.76028		3.75435	3.77845	3.77845		3.8591	3.84207	3.81699
4.65843	4.37953	4.11186	3.98889		3.90961	3.86099	3.86099		3.80383	3.75703	3.75703		3.70451	3.70451	3.6887		3.67027	3.66506	3.67302		3.7026	3.65692	3.63897		3.61625	3.60399	3.59656		3.67226	3.76617	3.75955		3.7545	3.77847	3.77847		3.85953	3.84107	3.81665
4.66563	4.37959	4.11249	3.98915		3.90923	3.86151	3.86151		3.80435	3.7578	3.7578		3.70428	3.70428	3.68828		3.67073	3.66486	3.67248		3.70342	3.65635	3.63823		3.61531	3.60354	3.59633		3.67276	3.76576	3.75864		3.75444	3.77811	3.77811		3.85963	3.84033	3.81643
4.67283	4.37959	4.11321	3.98937		3.90878	3.86183	3.86183		3.80477	3.75859	3.75859		3.70421	3.70421	3.688		3.67083	3.66455	3.67208		3.70406	3.65613	3.63734		3.61426	3.60293	3.59639		3.67348	3.76541	3.7577		3.75416	3.77738	3.77738		3.85935	3.83992	3.81634
4.68003	4.3795	4.11396	3.98949		3.90831	3.86189	3.86189		3.80505	3.75934	3.75934		3.70421	3.70421	3.6879		3.67045	3.66408	3.67189		3.70449	3.65626	3.63638		3.6132	3.60231	3.59674		3.67435	3.76518	3.75689		3.75375	3.77635	3.77635		3.8588	3.83984	3.81636
4.68723	4.37934	4.11468	3.98945		3.90785	3.86173	3.86173		3.80519	3.76	3.76		3.70422	3.70422	3.68803		3.66955	3.66339	3.67197		3.70468	3.6567	3.6355		3.61226	3.60176	3.59734		3.67528	3.76511	3.75631		3.7533	3.77513	3.77513		3.85815	3.84003	3.81645
4.69443	4.37913	4.11529	3.98923		3.90743	3.86135	3.86135		3.80521	3.76047	3.76047		3.70413	3.70413	3.68841		3.66819	3.66247	3.67233		3.70461	3.6574	3.63482		3.61155	3.60134	3.59809		3.67619	3.76518	3.75605		3.7529	3.77389	3.77389		3.85756	3.84039	3.81655
4.70163	4.37889	4.11572	3.98889		3.90708	3.86083	3.86083		3.80515	3.76069	3.76069		3.70389	3.70389	3.68909		3.66649	3.66136	3.67292		3.70429	3.65824	3.63449		3.61117	3.60104	3.59892		3.67704	3.76529	3.75612		3.75257	3.77277	3.77277		3.85714	3.84082	3.81661
4.70883	4.37863	4.11585	3.98853		3.90682	3.86019	3.86019		3.80499	3.76058	3.76058		3.70346	3.70346	3.69002		3.66465	3.66019	3.67364		3.70374	3.65906	3.63459		3.6112	3.60085	3.59979		3.67782	3.76541	3.75651		3.75239	3.77185	3.77185		3.85697	3.84123	3.81664
4.71603	4.37835	4.11561	3.98826		3.90663	3.8595	3.8595		3.80472	3.76015	3.76015		3.7028	3.7028	3.69115		3.6629	3.65908	3.67437		3.703	3.65964	3.63511		3.61167	3.60072	3.60065		3.67852	3.76549	3.75716		3.75241	3.77117	3.77117		3.85701	3.84159	3.81665
4.72323	4.37804	4.11499	3.9882		3.90642	3.85879	3.85879		3.80433	3.75946	3.75946		3.70196	3.70196	3.69245		3.66147	3.65815	3.67503		3.70207	3.65983	3.63597		3.61249	3.60062	3.60145		3.67914	3.76555	3.75801		3.7527	3.77071	3.77071		3.85723	3.84189	3.81668
4.73043	4.37779	4.11414	3.98844		3.90611	3.8581	3.8581		3.80382	3.75856	3.75856		3.701	3.701	3.69386		3.66051	3.6575	3.67553		3.70098	3.65957	3.63706		3.61353	3.60046	3.60215		3.67966	3.76555	3.75896		3.75327	3.77048	3.77048		3.8575	3.84215	3.81679
4.73763	4.37766	4.11321	3.98902		3.90564	3.85749	3.85749		3.80321	3.75755	3.75755		3.70005	3.70005	3.69534		3.66016	3.65718	3.67584		3.69974	3.6589	3.63826		3.61457	3.6002	3.6027		3.68004	3.76543	3.75992		3.75408	3.77047	3.77047		3.85768	3.84238	3.81696
4.74483	4.37766	4.11236	3.98987		3.90499	3.85699	3.85699		3.80251	3.75654	3.75654		3.69924	3.69924	3.69679		3.6604	3.65722	3.67591		3.69841	3.65793	3.63939		3.61544	3.59979	3.6031		3.68034	3.76515	3.76083		3.75503	3.77066	3.77066		3.85765	3.84262	3.81713
4.75203	4.37782	4.11168	3.99087		3.90419	3.8566	3.8566		3.80179	3.75559	3.75559		3.69869	3.69869	3.69806		3.66117	3.65757	3.67574		3.69709	3.6568	3.64037		3.616	3.59924	3.60334		3.68053	3.76474	3.76166		3.75602	3.77102	3.77102		3.85734	3.8429	3.81722
4.75923	4.37808	4.11127	3.99189		3.9033	3.85637	3.85637		3.80108	3.75476	3.75476		3.6985	3.6985	3.69908		3.66233	3.65811	3.67534		3.69583	3.65567	3.64105		3.61618	3.59862	3.60339		3.68065	3.76429	3.7624		3.757	3.7715	3.7715		3.85676	3.84327	3.81717
4.76643	4.37844	4.11119	3.99278		3.90241	3.85635	3.85635		3.80048	3.75406	3.75406		3.69874	3.69874	3.6998		3.6637	3.65862	3.67476		3.69469	3.65468	3.64146		3.61599	3.59801	3.60321		3.68062	3.7639	3.763		3.75788	3.77201	3.77201		3.85596	3.84372	3.81696
4.77363	4.37886	4.11149	3.99342		3.9016	3.85658	3.85658		3.80011	3.7535	3.7535		3.69938	3.69938	3.70022		3.66513	3.65888	3.67405		3.69374	3.65396	3.64166		3.61549	3.59746	3.60285		3.68043	3.76366	3.76343		3.75858	3.77253	3.77253		3.85502	3.84427	3.81657
4.78083	4.37929	4.1121	3.99371		3.90097	3.85701	3.85701		3.80001	3.75307	3.75307		3.70041	3.70041	3.70036		3.66646	3.65872	3.67327		3.69304	3.65356	3.64175		3.6148	3.59704	3.60233		3.68006	3.76359	3.76368		3.75901	3.77299	3.77299		3.85405	3.84486	3.81606
4.78803	4.37967	4.11288	3.99368		3.90056	3.85756	3.85756		3.80022	3.75273	3.75273		3.70176	3.70176	3.70024		3.6676	3.65807	3.67251		3.69267	3.65345	3.6418		3.61409	3.59679	3.60175		3.67954	3.76373	3.76376		3.75912	3.77334	3.77334		3.85312	3.84545	3.81541
4.79523	4.37993	4.11365	3.99339		3.9004	3.85805	3.85805		3.80065	3.75245	3.75245		3.70336	3.70336	3.69988		3.6685	3.65697	3.67184		3.69269	3.65353	3.64178		3.61348	3.59681	3.60118		3.67893	3.76412	3.76367		3.75892	3.77355	3.77355		3.85225	3.846	3.8147
4.80243	4.38005	4.11433	3.99293		3.90049	3.85835	3.85835		3.80123	3.7522	3.7522		3.70508	3.70508	3.69939		3.66915	3.65547	3.67133		3.69313	3.65369	3.64168		3.61308	3.59716	3.60066		3.67827	3.76474	3.76343		3.75848	3.77355	3.77355		3.85145	3.84649	3.81403
4.80963	4.38004	4.11486	3.99241		3.90081	3.85834	3.85834		3.80189	3.75195	3.75195		3.70682	3.70682	3.69887		3.66961	3.65372	3.67103		3.694	3.6538	3.64145		3.61292	3.59786	3.60026		3.67759	3.76556	3.76304		3.75789	3.77334	3.77334		3.8507	3.84685	3.81353
4.81683	4.37995	4.11526	3.99188		3.90129	3.85801	3.85801		3.8026	3.75172	3.75172		3.70849	3.70849	3.69835		3.66994	3.65195	3.67091		3.69528	3.65379	3.64109		3.613	3.5988	3.59996		3.67694	3.76647	3.76253		3.75725	3.773	3.773		3.85002	3.84699	3.81326
4.82403	4.37984	4.11555	3.99137		3.90189	3.85737	3.85737		3.80328	3.75152	3.75152		3.70999	3.70999	3.69782		3.67019	3.6504	3.67095		3.6969	3.65367	3.6406		3.61328	3.59989	3.59975		3.67638	3.76734	3.76193		3.75658	3.77254	3.77254		3.84938	3.84684	3.81323
4.83123	4.37979	4.11578	3.99089		3.90257	3.85652	3.85652		3.80388	3.75136	3.75136		3.71121	3.71121	3.69728		3.67035	3.64934	3.67107		3.69874	3.65348	3.63997		3.61372	3.601	3.59957		3.67597	3.76807	3.76131		3.75596	3.77206	3.77206		3.84874	3.84638	3.81336
4.83843	4.37979	4.11599	3.99039		3.90336	3.85563	3.85563		3.80434	3.75123	3.75123		3.71208	3.71208	3.69675		3.67039	3.64888	3.67119		3.70063	3.6533	3.63922		3.61426	3.60199	3.59941		3.67572	3.76862	3.76073		3.75543	3.77161	3.77161		3.84809	3.84563	3.81359
4.84563	4.37987	4.11624	3.98983		3.90429	3.85491	3.85491		3.8047	3.75113	3.75113		3.71251	3.71251	3.69624		3.6703	3.64901	3.67124		3.70238	3.65322	3.63844		3.61483	3.60278	3.59927		3.67563	3.76897	3.76023		3.75506	3.77123	3.77123		3.84748	3.84471	3.81388
4.85283	4.38	4.11652	3.98915		3.90539	3.85459	3.85459		3.80496	3.75105	3.75105		3.71252	3.71252	3.69573		3.67003	3.64963	3.67121		3.70381	3.65333	3.63779		3.61535	3.60329	3.59917		3.67566	3.76913	3.75986		3.75485	3.77097	3.77097		3.84694	3.84375	3.81421
4.86003	4.38008	4.1168	3.98831		3.90661	3.85481	3.85481		3.80513	3.75099	3.75099		3.71216	3.71216	3.69514		3.66957	3.65053	3.67112		3.70481	3.65369	3.63738		3.61582	3.60351	3.59911		3.67579	3.76915	3.75963		3.75482	3.77083	3.77083		3.84654	3.84285	3.81454
4.86723	4.38004	4.11697	3.98731		3.90787	3.85556	3.85556		3.80519	3.75097	3.75097		3.71157	3.71157	3.69442		3.66886	3.65158	3.67109		3.70529	3.65436	3.63728		3.61627	3.60349	3.59909		3.67598	3.76905	3.75952		3.75491	3.77082	3.77082		3.84636	3.84214	3.81483
4.87443	4.3798	4.11693	3.98619		3.90908	3.8567	3.8567		3.80509	3.75103	3.75103		3.7109	3.7109	3.69354		3.66791	3.65257	3.6712		3.70526	3.65534	3.63748		3.61679	3.60334	3.59909		3.67621	3.76892	3.75946		3.75507	3.77088	3.77088		3.84645	3.84168	3.81508
4.88163	4.37935	4.11662	3.98504		3.91017	3.85799	3.85799		3.80483	3.75121	3.75121		3.7103	3.7103	3.69255		3.66675	3.65339	3.67154		3.70479	3.65658	3.63792		3.61741	3.60321	3.59913		3.67642	3.76883	3.7594		3.75533	3.771	3.771		3.84687	3.84153	3.81531
4.88883	4.37873	4.11599	3.98394		3.91107	3.85918	3.85918		3.80441	3.75155	3.75155		3.70991	3.70991	3.69148		3.66544	3.65392	3.67209		3.70397	3.65798	3.63849		3.61814	3.60323	3.5992		3.67661	3.76885	3.75928		3.75564	3.77113	3.77113		3.84763	3.84164	3.81553
4.89603	4.37798	4.11505	3.98299		3.91172	3.86007	3.86007		3.80387	3.75206	3.75206		3.70982	3.70982	3.69042		3.6641	3.65416	3.67277		3.70296	3.65945	3.63911		3.61896	3.60343	3.5993		3.67677	3.769	3.75909		3.75601	3.77131	3.77131		3.84873	3.84187	3.81576
4.90323	4.37716	4.11385	3.98228		3.91206	3.86051	3.86051		3.80325	3.75276	3.75276		3.71009	3.71009	3.68943		3.66285	3.6542	3.67342		3.7019	3.6609	3.63965		3.61981	3.6038	3.59935		3.67692	3.76924	3.75881		3.75639	3.77154	3.77154		3.85008	3.842	3.81603
4.91043	4.37637	4.11249	3.98191		3.91206	3.86045	3.86045		3.80262	3.75361	3.75361		3.71062	3.71062	3.68868		3.66178	3.65417	3.67392		3.70089	3.66225	3.64		3.62057	3.60425	3.59932		3.67709	3.76954	3.75846		3.75674	3.77188	3.77188		3.85157	3.8419	3.81633
4.91763	4.3757	4.11113	3.98194		3.91178	3.85996	3.85996		3.80207	3.75456	3.75456		3.71128	3.71128	3.68834		3.66098	3.65419	3.67417		3.69999	3.66343	3.64009		3.62113	3.60469	3.59919		3.6773	3.76981	3.75808		3.75704	3.77237	3.77237		3.85303	3.84153	3.81669
4.92483	4.37527	4.1099	3.98237		3.9113	3.8592	3.8592		3.80173	3.75546	3.75546		3.7119	3.7119	3.68849		3.66053	3.6543	3.67416		3.6992	3.66434	3.63989		3.62133	3.60498	3.59901		3.67758	3.77001	3.75775		3.7573	3.77304	3.77304		3.85434	3.84091	3.81714
4.93203	4.37511	4.10893	3.98316		3.91073	3.85842	3.85842		3.80167	3.75619	3.75619		3.71232	3.71232	3.68909		3.66045	3.65449	3.67391		3.69853	3.66488	3.63945		3.62108	3.60505	3.59882		3.67795	3.77007	3.75756		3.75753	3.77388	3.77388		3.85534	3.84016	3.8177
4.93923	4.3752	4.10826	3.98422		3.91012	3.85781	3.85781		3.80195	3.75665	3.75665		3.71249	3.71249	3.68998		3.66071	3.65474	3.67352		3.69801	3.66498	3.6388		3.62036	3.60485	3.59858		3.67845	3.76995	3.75761		3.75777	3.77486	3.77486		3.85593	3.83943	3.81838
4.94643	4.3755	4.10794	3.9855		3.9095	3.85753	3.85753		3.80253	3.75683	3.75683		3.7124	3.7124	3.69095		3.66123	3.65502	3.67318		3.69765	3.6646	3.63801		3.61928	3.60436	3.59832		3.67904	3.76968	3.75795		3.75805	3.77588	3.77588		3.8561	3.83886	3.81919
4.95363	4.37596	4.10797	3.9869		3.90884	3.85762	3.85762		3.80334	3.75673	3.75673		3.71205	3.71205	3.69178		3.66188	3.65528	3.67306		3.69743	3.66374	3.63719		3.61803	3.60366	3.59802		3.67965	3.76928	3.75856		3.75833	3.77682	3.77682		3.8559	3.83862	3.82005
4.96083	4.37654	4.10833	3.98831		3.90815	3.85804	3.85804		3.80424	3.75635	3.75635		3.71146	3.71146	3.69227		3.66251	3.65551	3.67328		3.69732	3.66243	3.63643		3.61682	3.60283	3.59769		3.68021	3.76888	3.75938		3.75861	3.77753	3.77753		3.85542	3.8388	3.82089
4.96803	4.37717	4.10894	3.98959		3.90745	3.85866	3.85866		3.80506	3.75577	3.75577		3.71065	3.71065	3.69229		3.66302	3.65564	3.67382		3.69728	3.66077	3.63585		3.61582	3.602	3.59738		3.6806	3.76862	3.76037		3.75887	3.77796	3.77796		3.85478	3.83939	3.82159
4.97523	4.37777	4.10972	3.99066		3.90674	3.85934	3.85934		3.80567	3.75507	3.75507		3.70972	3.70972	3.69177		3.66334	3.65569	3.67458		3.69727	3.65893	3.63556		3.61512	3.60129	3.59707		3.68075	3.76867	3.76144		3.75907	3.77812	3.77812		3.85409	3.84029	3.82206
4.98243	4.37822	4.11056	3.99148		3.90601	3.85992	3.85992		3.80592	3.75435	3.75435		3.70874	3.70874	3.6908		3.66343	3.6557	3.6754		3.69726	3.65708	3.6356		3.61475	3.60079	3.5968		3.68061	3.76914	3.7625		3.75917	3.77807	3.77807		3.85341	3.84131	3.82226
4.98963	4.37845	4.11136	3.99204		3.90525	3.86031	3.86031		3.8058	3.75368	3.75368		3.70777	3.70777	3.68957		3.6633	3.65574	3.67616		3.69717	3.65548	3.63598		3.61465	3.60056	3.59657		3.68016	3.77004	3.76343		3.7591	3.77793	3.77793		3.8528	3.84224	3.82218
4.99683	4.37844	4.11205	3.99233		3.90452	3.86047	3.86047		3.80531	3.7531	3.7531		3.70678	3.70678	3.68832		3.663	3.65582	3.67677		3.69692	3.65429	3.63669		3.61475	3.6006	3.5964		3.67946	3.7713	3.76412		3.75884	3.77783	3.77783		3.8523	3.84296	3.82186
5.00403	4.37819	4.11257	3.99229		3.90388	3.86038	3.86038		3.8045	3.75263	3.75263		3.70576	3.70576	3.6873		3.66262	3.65593	3.67715		3.69644	3.65365	3.63764		3.61494	3.60093	3.59631		3.67861	3.77277	3.76453		3.75838	3.77788	3.77788		3.85196	3.84338	3.82141
5.01123	4.37772	4.11289	3.99192		3.9034	3.8601	3.8601		3.8035	3.75226	3.75226		3.70476	3.70476	3.68669		3.6623	3.65608	3.67724		3.69573	3.6536	3.63875		3.61509	3.60149	3.59631		3.67775	3.7743	3.76472		3.75773	3.77817	3.77817		3.8518	3.84353	3.821
5.01843	4.37703	4.11299	3.99129		3.90312	3.85972	3.85972		3.80245	3.75198	3.75198		3.70388	3.70388	3.68659		3.66211	3.65623	3.67702		3.69485	3.65413	3.63988		3.61512	3.6022	3.59637		3.67699	3.77566	3.76476		3.75699	3.77874	3.77874		3.85181	3.84348	3.82075
5.02563	4.37616	4.11285	3.9905		3.90301	3.85934	3.85934		3.80149	3.75177	3.75177		3.70325	3.70325	3.68699		3.66209	3.65641	3.67658		3.69391	3.65508	3.6409		3.61506	3.60297	3.59641		3.67639	3.77671	3.76472		3.75623	3.77955	3.77955		3.85195	3.84333	3.82077
5.03283	4.37513	4.11248	3.98968		3.90305	3.85904	3.85904		3.80074	3.75159	3.75159		3.70296	3.70296	3.68783		3.66219	3.65661	3.67597		3.69303	3.65626	3.64166		3.61499	3.6037	3.59637		3.676	3.77727	3.7647		3.75553	3.78047	3.78047		3.8522	3.84322	3.82112
5.04003	4.37406	4.11189	3.9889		3.90318	3.85886	3.85886		3.80023	3.75146	3.75146		3.70303	3.70303	3.68896		3.66234	3.65684	3.67527		3.6923	3.65747	3.64209		3.61502	3.60432	3.5962		3.67579	3.77728	3.76475		3.75497	3.78134	3.78134		3.85251	3.84331	3.82174
5.04723	4.37301	4.11115	3.98821		3.90335	3.85883	3.85883		3.80001	3.75134	3.75134		3.70342	3.70342	3.69021		3.66244	3.65711	3.67446		3.69176	3.65851	3.6422		3.61524	3.60481	3.59587		3.67573	3.77681	3.76495		3.75459	3.78199	3.78199		3.85284	3.84368	3.82257
5.05443	4.37205	4.11035	3.98764		3.9035	3.85894	3.85894		3.80009	3.75127	3.75127		3.70412	3.70412	3.6914		3.66244	3.65747	3.67351		3.69142	3.65925	3.64203		3.6157	3.60516	3.59541		3.67571	3.77601	3.7653		3.75443	3.78231	3.78231		3.8531	3.84435	3.82349
5.06163	4.37122	4.10956	3.9872		3.90358	3.85913	3.85913		3.80045	3.75123	3.75123		3.70505	3.70505	3.69235		3.66229	3.65796	3.67249		3.69125	3.65965	3.64166		3.61639	3.60538	3.59488		3.67562	3.77508	3.76575		3.7545	3.78228	3.78228		3.85324	3.84526	3.82444
5.06883	4.37052	4.10882	3.98684		3.90354	3.8593	3.8593		3.801	3.75119	3.75119		3.7061	3.7061	3.69294		3.66202	3.6586	3.67148		3.6912	3.65973	3.64115		3.61733	3.60544	3.59435		3.6754	3.7742	3.76619		3.75482	3.78188	3.78188		3.85323	3.84631	3.82535
5.07603	4.36993	4.10817	3.98651		3.90336	3.85935	3.85935		3.80164	3.75115	3.75115		3.70708	3.70708	3.69313		3.66171	3.65941	3.67065		3.69118	3.65952	3.64058		3.61847	3.60539	3.59395		3.67507	3.77349	3.7665		3.75532	3.78113	3.78113		3.85312	3.84734	3.8262
5.08323	4.36946	4.10763	3.98614		3.90308	3.8592	3.8592		3.80223	3.75109	3.75109		3.70785	3.70785	3.69292		3.66145	3.66032	3.6701		3.6911	3.65909	3.64004		3.61975	3.60525	3.59377		3.67474	3.77298	3.76664		3.75593	3.7801	3.7801		3.85301	3.84828	3.82702
5.09043	4.36904	4.10726	3.98566		3.90276	3.85881	3.85881		3.80266	3.75101	3.75101		3.70833	3.70833	3.6924		3.66132	3.66126	3.66991		3.6909	3.65853	3.63965		3.62107	3.60504	3.5939		3.67447	3.77268	3.76658		3.75652	3.77886	3.77886		3.85301	3.84905	3.82792
5.09763	4.36859	4.10708	3.98504		3.90243	3.85823	3.85823		3.80279	3.75091	3.75091		3.70852	3.70852	3.69164		3.66139	3.66217	3.67008		3.69058	3.65786	3.63943		3.62234	3.60476	3.59429		3.67433	3.77256	3.76633		3.75702	3.77757	3.77757		3.85324	3.84964	3.82904
5.10483	4.368	4.10705	3.98431		3.90211	3.8575	3.8575		3.80255	3.75077	3.75077		3.70846	3.70846	3.69074		3.66166	3.66299	3.67059		3.69021	3.65714	3.63936		3.62347	3.60437	3.5948		3.67433	3.77252	3.76595		3.75732	3.7764	3.7764		3.85382	3.85011	3.83048
5.11203	4.3672	4.10715	3.98352		3.9018	3.85668	3.85668		3.80195	3.75057	3.75057		3.70822	3.70822	3.68978		3.66211	3.66359	3.67138		3.68991	3.65642	3.63935		3.62436	3.60387	3.59529		3.6745	3.77246	3.76549		3.75738	3.77545	3.77545		3.85479	3.85052	3.83228
5.11923	4.36624	4.10734	3.98272		3.90151	3.8559	3.8559		3.80099	3.7503	3.7503		3.70786	3.70786	3.68891		3.66265	3.6639	3.6723		3.68975	3.65568	3.63932		3.62493	3.60328	3.5956		3.67481	3.77229	3.76503		3.75713	3.77477	3.77477		3.85616	3.85099	3.83441
5.12643	4.3652	4.10758	3.98197		3.90127	3.85529	3.85529		3.79982	3.75	3.75		3.70747	3.70747	3.68823		3.66318	3.66387	3.67315		3.68981	3.65495	3.63923		3.62512	3.60265	3.59566		3.6752	3.77196	3.76467		3.75663	3.77437	3.77437		3.85789	3.85162	3.83681
5.13363	4.3642	4.10787	3.98128		3.90114	3.85501	3.85501		3.79855	3.7497	3.7497		3.70715	3.70715	3.68783		3.66361	3.66349	3.67377		3.69011	3.65425	3.6391		3.62493	3.60204	3.59543		3.67562	3.77148	3.76441		3.75595	3.77427	3.77427		3.85994	3.85252	3.83943
5.14083	4.36336	4.10821	3.98066		3.90114	3.85514	3.85514		3.79735	3.74942	3.74942		3.70696	3.70696	3.68768		3.66386	3.66285	3.67398		3.69064	3.6537	3.63892		3.62436	3.60147	3.59493		3.67599	3.77096	3.76423		3.75524	3.77447	3.77447		3.86231	3.85376	3.8422
5.14803	4.36281	4.1086	3.98005		3.90124	3.85568	3.85568		3.79638	3.74914	3.74914		3.70687	3.70687	3.68777		3.66392	3.66199	3.67372		3.69138	3.6534	3.63868		3.62347	3.60098	3.59426		3.67631	3.77049	3.76407		3.75463	3.77498	3.77498		3.86499	3.85535	3.84513
5.15523	4.36262	4.10901	3.97937		3.90141	3.85649	3.85649		3.79574	3.74885	3.74885		3.70684	3.70684	3.68806		3.66385	3.66101	3.67304		3.69224	3.65345	3.6384		3.62236	3.60058	3.59358		3.67658	3.77018	3.76387		3.75422	3.7757	3.7757		3.86798	3.85727	3.84821
5.16243	4.36282	4.10943	3.9786		3.90164	3.85752	3.85752		3.79553	3.74857	3.74857		3.70684	3.70684	3.68853		3.66376	3.66001	3.67208		3.69309	3.65392	3.63812		3.62122	3.60031	3.59308		3.67686	3.77012	3.76363		3.75405	3.77653	3.77653		3.87129	3.85945	3.85153
5.16963	4.36338	4.10982	3.97775		3.90193	3.85869	3.85869		3.79571	3.74833	3.74833		3.70685	3.70685	3.68916		3.66373	3.65909	3.67101		3.69382	3.65475	3.6379		3.62024	3.60021	3.59289		3.67721	3.77032	3.76337		3.75416	3.77738	3.77738		3.87493	3.86187	3.8553
5.17683	4.36417	4.11013	3.97688		3.90224	3.85997	3.85997		3.79624	3.74817	3.74817		3.70686	3.70686	3.6899		3.66386	3.65831	3.66998		3.69436	3.65589	3.63778		3.61957	3.60032	3.59311		3.67769	3.77076	3.76314		3.75452	3.77823	3.77823		3.87895	3.86458	3.85981
5.18403	4.36499	4.11036	3.97611		3.90255	3.86125	3.86125		3.79704	3.74808	3.74808		3.70682	3.70682	3.69064		3.66419	3.6577	3.66911		3.69469	3.65728	3.63774		3.6193	3.60061	3.59374		3.6783	3.77133	3.76302		3.75508	3.77906	3.77906		3.88331	3.86769	3.86536
5.19123	4.36569	4.11046	3.9755		3.90278	3.86242	3.86242		3.79797	3.74802	3.74802		3.70669	3.70669	3.69131		3.66476	3.65726	3.66851		3.69488	3.65884	3.63779		3.61944	3.60108	3.59474		3.67905	3.77197	3.76311		3.75574	3.77983	3.77983		3.88802	3.87135	3.87217
5.19843	4.36615	4.11041	3.97516		3.90289	3.86339	3.86339		3.7989	3.74798	3.74798		3.70646	3.70646	3.69189		3.66557	3.65694	3.66827		3.69501	3.66041	3.63792		3.61994	3.60171	3.59605		3.67996	3.77256	3.7635		3.75643	3.7805	3.7805		3.893	3.87574	3.88044
5.20563	4.3663	4.1102	3.97519		3.90294	3.86413	3.86413		3.79973	3.74799	3.74799		3.70616	3.70616	3.69237		3.66663	3.65674	3.66847		3.69518	3.66185	3.63813		3.62071	3.60249	3.59761		3.68103	3.77301	3.76425		3.75714	3.78104	3.78104		3.89829	3.88106	3.89028
5.21283	4.36617	4.10979	3.97563		3.903	3.86464	3.86464		3.80036	3.74813	3.74813		3.70588	3.70588	3.69267		3.66786	3.65667	3.66909		3.69555	3.66303	3.63843		3.62164	3.60342	3.59932		3.68232	3.77327	3.76536		3.7579	3.78152	3.78152		3.90401	3.88755	3.90179
5.22003	4.36578	4.10923	3.97649		3.9031	3.86491	3.86491		3.80074	3.74845	3.74845		3.70567	3.70567	3.69275		3.66921	3.65674	3.67007		3.69619	3.66387	3.63883		3.62262	3.60445	3.6011		3.68382	3.77337	3.76678		3.75876	3.78203	3.78203		3.91038	3.89543	3.91504
5.22723	4.36524	4.10854	3.97769		3.90325	3.86488	3.86488		3.80084	3.74892	3.74892		3.7056	3.7056	3.69253		3.67059	3.65698	3.67131		3.69712	3.66442	3.63933		3.62359	3.60549	3.60284		3.68556	3.77339	3.76841		3.75981	3.78273	3.78273		3.91769	3.90487	3.93013
5.23443	4.36466	4.10777	3.9791		3.90342	3.86444	3.86444		3.80068	3.74956	3.74956		3.70572	3.70572	3.69202		3.67193	3.65745	3.67274		3.69829	3.6647	3.63994		3.62451	3.6065	3.60449		3.6875	3.77347	3.77009		3.76107	3.78374	3.78374		3.92621	3.91587	3.94711
5.24163	4.36411	4.10693	3.98058		3.90361	3.86358	3.86358		3.80033	3.75034	3.75034		3.7061	3.7061	3.69132		3.67321	3.65822	3.67435		3.6996	3.66481	3.64066		3.62543	3.60748	3.60599		3.68961	3.77374	3.77167		3.76254	3.78516	3.78516		3.93626	3.92838	3.9661
5.24883	4.36367	4.10606	3.98202		3.90382	3.86234	3.86234		3.79989	3.75126	3.75126		3.70675	3.70675	3.6905		3.67439	3.65939	3.67612		3.70096	3.66479	3.64152		3.62641	3.60847	3.60734		3.69182	3.77433	3.77305		3.76422	3.78709	3.78709		3.94812	3.94233	3.98728
5.25603	4.36341	4.10516	3.98337		3.90401	3.8608	3.8608		3.79945	3.75232	3.75232		3.70765	3.70765	3.68968		3.67547	3.66098	3.67798		3.70228	3.66474	3.64252		3.62749	3.60953	3.60857		3.69405	3.77535	3.77419		3.7661	3.78957	3.78957		3.96207	3.95768	4.01086
5.26323	4.36337	4.10432	3.98455		3.90413	3.85907	3.85907		3.79915	3.75341	3.75341		3.7087	3.7087	3.689		3.6764	3.66299	3.67981		3.70348	3.66474	3.64369		3.6287	3.61073	3.60975		3.69623	3.77681	3.77511		3.76815	3.79261	3.79261		3.97833	3.97443	4.03714
5.27043	4.36356	4.1036	3.9855		3.90412	3.85732	3.85732		3.79902	3.75437	3.75437		3.70982	3.70982	3.68857		3.67713	3.66535	3.68155		3.70453	3.66495	3.64501		3.63007	3.61214	3.61103		3.69834	3.77871	3.77591		3.77035	3.79612	3.79612		3.99707	3.99263	4.06641
5.27763	4.36398	4.10308	3.98619		3.90398	3.8557	3.8557		3.7991	3.7551	3.7551		3.71091	3.71091	3.68854		3.67763	3.66797	3.68316		3.70545	3.66544	3.64649		3.63157	3.61386	3.61255		3.70041	3.78096	3.7767		3.77269	3.79994	3.79994		4.01843	4.01239	4.09898
5.28483	4.36459	4.10286	3.98663		3.90376	3.85435	3.85435		3.79941	3.75556	3.75556		3.71193	3.71193	3.68899		3.67793	3.67067	3.68467		3.70634	3.66623	3.64813		3.63311	3.61595	3.61444		3.70246	3.78343	3.77759		3.77522	3.80394	3.80394		4.04255	4.03395	4.13518
5.29203	4.36532	4.10295	3.98686		3.90353	3.8534	3.8534		3.8	3.75574	3.75574		3.71292	3.71292	3.68993		3.6781	3.6733	3.6861		3.7073	3.66731	3.64989		3.63463	3.61845	3.61677		3.70458	3.78598	3.77872		3.77798	3.80803	3.80803		4.06964	4.0577	4.17536
5.29923	4.36618	4.10337	3.98694		3.90335	3.85292	3.85292		3.80083	3.75571	3.75571		3.71391	3.71391	3.69126		3.67818	3.67569	3.68752		3.70847	3.66862	3.65176		3.63611	3.62137	3.61953		3.70686	3.78848	3.78016		3.78108	3.81221	3.81221		4.09994	4.08412	4.21997
5.30643	4.36711	4.10411	3.98691		3.90329	3.85287	3.85287		3.80187	3.75553	3.75553		3.715	3.715	3.69284		3.67827	3.67775	3.68897		3.70992	3.67009	3.65369		3.6376	3.62463	3.62267		3.70939	3.79085	3.78193		3.78463	3.81653	3.81653		4.13367	4.11369	4.2695
5.31363	4.36807	4.10514	3.98679		3.90344	3.8532	3.8532		3.80307	3.75527	3.75527		3.71624	3.71624	3.69455		3.67844	3.67941	3.69056		3.71172	3.67164	3.65562		3.6392	3.62816	3.62609		3.71225	3.79308	3.78404		3.78872	3.82116	3.82116		4.17114	4.14689	4.32452
5.32083	4.36898	4.10638	3.98661		3.90389	3.85376	3.85376		3.80441	3.75504	3.75504		3.71767	3.71767	3.69629		3.67879	3.68066	3.69236		3.71392	3.67321	3.65746		3.64103	3.63184	3.62968		3.71547	3.79524	3.78641		3.79339	3.82627	3.82627		4.21267	4.18419	4.38555
5.32803	4.36977	4.10773	3.98644		3.90463	3.85439	3.85439		3.80586	3.75497	3.75497		3.71932	3.71932	3.69802		3.67945	3.68161	3.69439		3.71655	3.67476	3.65921		3.64322	3.6356	3.63332		3.71904	3.79738	3.78903		3.79875	3.83213	3.83213		4.25867	4.22611	4.45317
5.33523	4.37038	4.10907	3.98631		3.90561	3.85499	3.85499		3.8074	3.75514	3.75514		3.72109	3.72109	3.69967		3.68053	3.68238	3.69662		3.7196	3.67633	3.66086		3.64587	3.63931	3.63696		3.72293	3.79962	3.79186		3.80489	3.83899	3.83899		4.30964	4.27312	4.52794
5.34243	4.37083	4.11035	3.98626		3.90669	3.85544	3.85544		3.80895	3.75558	3.75558		3.72285	3.72285	3.70124		3.68207	3.68316	3.69897		3.72303	3.67801	3.66244		3.64904	3.64291	3.64062		3.72714	3.80208	3.79491		3.81196	3.84707	3.84707		4.36611	4.32569	4.6105
5.34963	4.37117	4.1115	3.9863		3.90775	3.85576	3.85576		3.81043	3.75627	3.75627		3.72447	3.72447	3.70279		3.68408	3.68411	3.70138		3.72678	3.67994	3.66402		3.65277	3.64635	3.6444		3.73169	3.80489	3.79823		3.82012	3.85653	3.85653		4.42868	4.38421	4.70142
5.35683	4.37137	4.11252	3.98639		3.90864	3.856	3.856		3.81177	3.75719	3.75719		3.72582	3.72582	3.70438		3.68652	3.68534	3.70378		3.73081	3.6823	3.66565		3.65701	3.64965	3.64843		3.73659	3.80819	3.80185		3.82957	3.86744	3.86744		4.49791	4.44905	4.80127
5.36403	4.37147	4.11338	3.98654		3.90927	3.85621	3.85621		3.81293	3.75829	3.75829		3.72684	3.72684	3.70609		3.6893	3.68691	3.70615		3.73506	3.68521	3.6674		3.66169	3.65289	3.65281		3.74185	3.81208	3.80585		3.8405	3.87988	3.87988		4.57439	4.52061	4.91053
5.37123	4.37145	4.11404	3.98671		3.90957	3.85648	3.85648		3.81394	3.7595	3.7595		3.72756	3.72756	3.70793		3.69233	3.68885	3.70856		3.73943	3.68877	3.66936		3.66667	3.65624	3.65759		3.74751	3.81662	3.81028		3.85306	3.89392	3.89392		4.65868	4.59935	5.02971
5.37843	4.3713	4.11451	3.98688		3.90952	3.8569	3.8569		3.81482	3.76076	3.76076		3.72804	3.72804	3.70988		3.69553	3.69111	3.7111		3.74384	3.69299	3.67166		3.67182	3.6598	3.66278		3.75361	3.82185	3.81519		3.86745	3.90969	3.90969		4.7513	4.6857	5.15929
5.38563	4.37106	4.11479	3.98701		3.90916	3.85756	3.85756		3.81563	3.76197	3.76197		3.72842	3.72842	3.71186		3.69882	3.69363	3.71393		3.74823	3.69782	3.67435		3.67704	3.66373	3.66836		3.76025	3.8278	3.82065		3.88381	3.92735	3.92735		4.85271	4.7801	5.29983
5.39283	4.37071	4.11487	3.98708		3.90866	3.8585	3.8585		3.81646	3.76309	3.76309		3.72884	3.72884	3.71378		3.70212	3.6963	3.71717		3.75258	3.70315	3.67746		3.68227	3.66815	3.67427		3.76749	3.83452	3.82672		3.90232	3.94712	3.94712		4.96332	4.88296	5.45181
5.40003	4.37024	4.11475	3.98712		3.90821	3.85971	3.85971		3.81739	3.76409	3.76409		3.72947	3.72947	3.71558		3.70539	3.69904	3.72085		3.75692	3.70884	3.681		3.68757	3.67319	3.6804		3.77541	3.84199	3.83351		3.92305	3.96934	3.96934		5.08353	4.99473	5.61569
5.40723	4.36958	4.11448	3.98719		3.90799	3.86115	3.86115		3.81849	3.76497	3.76497		3.73047	3.73047	3.71723		3.70862	3.7018	3.72494		3.76131	3.71474	3.68493		3.693	3.67895	3.68667		3.78406	3.85018	3.84112		3.94617	3.9944	3.9944		5.21371	5.11594	5.79191
5.41443	4.36875	4.11413	3.9874		3.90812	3.86273	3.86273		3.8198	3.76578	3.76578		3.73198	3.73198	3.71871		3.71186	3.7046	3.7293		3.7658	3.72071	3.68921		3.69866	3.68547	3.69304		3.79357	3.85905	3.84963		3.97183	4.02272	4.02272		5.35427	5.24715	5.98092
5.42163	4.36781	4.11379	3.98776		3.90863	3.86436	3.86436		3.82133	3.76662	3.76662		3.73405	3.73405	3.72007		3.71518	3.7075	3.73374		3.77048	3.7267	3.69384		3.70467	3.69275	3.69956		3.80413	3.86858	3.85909		4.00032	4.0547	4.0547		5.50563	5.38882	6.18314
5.42883	4.36692	4.11361	3.98828		3.9095	3.86596	3.86596		3.82305	3.76764	3.76764		3.73668	3.73668	3.72137		3.71865	3.71061	3.73805		3.77541	3.73263	3.69878		3.71113	3.70067	3.70632		3.81591	3.87881	3.86959		4.03204	4.09074	4.09074		5.66817	5.54138	6.39889
5.43603	4.3662	4.1137	3.98892		3.91069	3.86748	3.86748		3.82488	3.76895	3.76895		3.73983	3.73983	3.72267		3.72237	3.71403	3.74204		3.78066	3.73853	3.70402		3.71819	3.70919	3.71339		3.82906	3.88982	3.8812		4.06739	4.13114	4.13114		5.84226	5.70512	6.6283
5.44323	4.3658	4.11415	3.98966		3.91208	3.86887	3.86887		3.82674	3.77066	3.77066		3.7434	3.7434	3.72405		3.72638	3.71785	3.74561		3.78625	3.74444	3.70953		3.72589	3.71821	3.72089		3.84371	3.90168	3.89395		4.1068	4.17617	4.17617		6.02818	5.88031	6.87127
5.45043	4.36578	4.115	3.99047		3.91354	3.87008	3.87008		3.82857	3.77278	3.77278		3.74728	3.74728	3.72562		3.73071	3.72214	3.74874		3.79215	3.7504	3.71529		3.73425	3.72772	3.7289		3.85996	3.91452	3.90786		4.15064	4.22604	4.22604		6.22608	6.06712	7.12751
5.45763	4.36617	4.11624	3.99126		3.91493	3.87107	3.87107		3.83028	3.77525	3.77525		3.75133	3.75133	3.72748		3.73533	3.72688	3.75154		3.79827	3.75649	3.72131		3.74318	3.73766	3.73754		3.87783	3.92845	3.92288		4.19929	4.28094	4.28094		6.43594	6.26561	7.39646
5.46483	4.36698	4.11779	3.9919		3.91615	3.87184	3.87184		3.83182	3.77796	3.77796		3.75537	3.75537	3.72962		3.74015	3.73201	3.75417		3.80455	3.76273	3.7276		3.7526	3.74799	3.74687		3.89736	3.94362	3.93898		4.25302	4.34102	4.34102		6.65755	6.47568	7.67725
5.47204	4.36818	4.11954	3.99231		3.91717	3.87239	3.87239		3.83309	3.78072	3.78072		3.75927	3.75927	3.73206		3.74505	3.73738	3.75682		3.81092	3.76918	3.73415		3.76239	3.75869	3.7569		3.91853	3.96017	3.95615		4.31202	4.40641	4.40641		6.89053	6.69702	7.9688
5.47924	4.36966	4.12135	3.99248		3.91801	3.87275	3.87275		3.83413	3.78333	3.78333		3.76294	3.76294	3.73476		3.7499	3.74281	3.75969		3.81741	3.77587	3.74091		3.77253	3.76978	3.7676		3.9413	3.97817	3.97442		4.37632	4.4772	4.4772		7.13427	6.92917	8.2698
5.48644	4.37125	4.1231	3.99249		3.91871	3.87298	3.87298		3.835	3.78563	3.78563		3.76634	3.76634	3.73769		3.75457	3.74814	3.7629		3.82401	3.78283	3.74779		3.78302	3.78128	3.77889		3.96563	3.99764	3.99386		4.4459	4.5534	4.5534		7.38796	7.17145	8.57884
5.49364	4.37277	4.12465	3.99247		3.91931	3.87316	3.87316		3.83583	3.78751	3.78751		3.76949	3.76949	3.74084		3.75893	3.75319	3.76653		3.83082	3.79003	3.75473		3.79388	3.79321	3.79065		3.99154	4.01856	4.01453		4.52068	4.63501	4.63501		7.65058	7.42308	8.89443
5.50084	4.37408	4.12593	3.99252		3.91986	3.87335	3.87335		3.83676	3.78893	3.78893		3.77243	3.77243	3.7441		3.76295	3.75786	3.77058		3.83794	3.79738	3.76171		3.8052	3.80554	3.80283		4.01902	4.04093	4.03655		4.60054	4.72189	4.72189		7.92092	7.68303	9.21496
5.50804	4.37512	4.12692	3.99269		3.92041	3.87366	3.87366		3.83788	3.78997	3.78997		3.77525	3.77525	3.7474		3.76667	3.76214	3.77498		3.84544	3.80479	3.76874		3.81699	3.81818	3.81536		4.04805	4.06478	4.06002		4.68531	4.8138	4.8138		8.19763	7.95011	9.53878
5.51524	4.37586	4.12763	3.99306		3.92107	3.87421	3.87421		3.83928	3.79075	3.79075		3.77803	3.77803	3.75066		3.77012	3.76604	3.77972		3.8534	3.81218	3.77587		3.82934	3.83108	3.8282		4.07863	4.09012	4.08511		4.77473	4.91036	4.91036		8.47926	8.22294	9.86419
5.52244	4.37632	4.12813	3.9937		3.92196	3.87509	3.87509		3.84102	3.79145	3.79145		3.78085	3.78085	3.75379		3.7734	3.76967	3.78466		3.86181	3.81948	3.78314		3.84226	3.84421	3.84132		4.11076	4.11693	4.11188		4.86848	5.01117	5.01117		8.76431	8.50008	10.1895
5.52964	4.37655	4.12843	3.99464		3.92315	3.87635	3.87635		3.84307	3.79224	3.79224		3.78376	3.78376	3.75676		3.77661	3.77316	3.78973		3.87065	3.82671	3.79058		3.85575	3.85755	3.85471		4.14444	4.14512	4.14043		4.96614	5.11569	5.11569		9.05127	8.78001	10.5128
5.53684	4.37665	4.12858	3.99585		3.92467	3.87798	3.87798		3.84533	3.79326	3.79326		3.78673	3.78673	3.75956		3.77984	3.77665	3.79476		3.87983	3.83387	3.79822		3.86977	3.87112	3.86838		4.17967	4.17454	4.17073		5.06721	5.22341	5.22341		9.33867	9.06124	10.8325
5.54404	4.37676	4.1286	3.99724		3.92653	3.87992	3.87992		3.84763	3.79454	3.79454		3.78976	3.78976	3.76214		3.78318	3.78023	3.79961		3.8892	3.84098	3.8061		3.88422	3.88495	3.88238		4.21638	4.20504	4.20269		5.17107	5.33369	5.33369		9.62508	9.34224	11.1465
5.55124	4.377	4.12855	3.99869		3.92871	3.88207	3.88207		3.84981	3.79609	3.79609		3.79277	3.79277	3.76452		3.78671	3.784	3.80417		3.89857	3.84814	3.81417		3.89902	3.89913	3.89677		4.25451	4.23639	4.23616		5.27712	5.44594	5.44594		9.90908	9.62149	11.4533
5.55844	4.3775	4.12849	4.00012		3.93115	3.88433	3.88433		3.85173	3.79782	3.79782		3.79571	3.79571	3.76666		3.79043	3.78795	3.80835		3.90778	3.85549	3.82236		3.91411	3.91368	3.91151		4.29391	4.26832	4.27095		5.38467	5.55953	5.55953		10.1893	9.89745	11.751
5.56564	4.37831	4.12849	4.00146		3.93367	3.88657	3.88657		3.85333	3.79962	3.79962		3.79848	3.79848	3.76861		3.79432	3.79203	3.81213		3.91667	3.86315	3.83049		3.92947	3.92863	3.92657		4.33443	4.30053	4.30685		5.49306	5.67389	5.67389		10.4642	10.1686	12.0382
5.57284	4.37945	4.12857	4.00273		3.93603	3.88865	3.88865		3.85462	3.80138	3.80138		3.80098	3.80098	3.77039		3.79837	3.79616	3.8155		3.92518	3.87114	3.83846		3.94506	3.94393	3.94187		4.37585	4.33273	4.34362		5.60165	5.78839	5.78839		10.7323	10.4334	12.3135
5.58004	4.3809	4.12877	4.0039		3.93799	3.89044	3.89044		3.85567	3.80298	3.80298		3.80316	3.80316	3.772		3.8025	3.80021	3.81845		3.93328	3.87937	3.84616		3.96079	3.95951	3.95734		4.41787	4.36472	4.38099		5.70983	5.90237	5.90237		10.9923	10.6905	12.5755
5.58724	4.38257	4.12913	4.00499		3.93934	3.89189	3.89189		3.85658	3.80436	3.80436		3.80498	3.80498	3.77347		3.80663	3.80411	3.82107		3.94095	3.8877	3.85352		3.97657	3.97527	3.9729		4.46011	4.39648	4.41872		5.81698	6.01518	6.01518		11.2425	10.9385	12.823
5.59444	4.38433	4.12966	4.00599		3.94005	3.89293	3.89293		3.85748	3.80547	3.80547		3.80648	3.80648	3.77484		3.81064	3.8078	3.82352		3.94816	3.89596	3.86056		3.99221	3.99108	3.98847		4.50217	4.42807	4.45657		5.92256	6.12621	6.12621		11.4816	11.1764	13.055
5.60164	4.38601	4.13034	4.0069		3.94016	3.89357	3.89357		3.85843	3.80633	3.80633		3.80774	3.80774	3.77617		3.8144	3.81125	3.82595		3.95491	3.90401	3.86732		4.00757	4.0068	4.00392		4.5436	4.45957	4.49436		6.02599	6.23494	6.23494		11.7085	11.4031	13.2705
5.60884	4.3875	4.13107	4.00776		3.93978	3.89381	3.89381		3.85946	3.80698	3.80698		3.8088	3.8088	3.77751		3.81784	3.81447	3.82848		3.96121	3.91173	3.87385		4.02246	4.02229	4.01913		4.58405	4.49097	4.53191		6.12671	6.34089	6.34089		11.9219	11.6178	13.4687
5.61604	4.3887	4.13173	4.00855		3.93908	3.89369	3.89369		3.86054	3.80746	3.80746		3.80973	3.80973	3.77887		3.82097	3.81748	3.83115		3.96708	3.91901	3.88021		4.03671	4.03743	4.03401		4.62323	4.52228	4.56904		6.22419	6.44352	6.44352		12.121	11.8195	13.6489
5.62324	4.38955	4.13222	4.00926		3.93826	3.89324	3.89324		3.86158	3.80783	3.80783		3.81061	3.81061	3.78026		3.82377	3.82029	3.83394		3.97255	3.92579	3.88645		4.05018	4.05211	4.04845		4.66097	4.55341	4.60556		6.31787	6.54233	6.54233		12.3052	12.0076	13.8106
5.63044	4.39004	4.13244	4.00984		3.93755	3.89255	3.89255		3.86251	3.80809	3.80809		3.81147	3.81147	3.78163		3.82627	3.82291	3.83679		3.97764	3.93215	3.89257		4.06278	4.0662	4.06232		4.69715	4.58427	4.64129		6.40726	6.63683	6.63683		12.4738	12.1814	13.9535
5.63764	4.39013	4.13233	4.01022		3.93714	3.89168	3.89168		3.86322	3.80827	3.80827		3.81231	3.81231	3.78295		3.82848	3.82532	3.83961		3.98238	3.93817	3.89851		4.07454	4.07954	4.07549		4.73173	4.61467	4.6761		6.49194	6.72658	6.72658		12.6265	12.34	14.0776
5.64484	4.38986	4.13192	4.01043		3.93709	3.89078	3.89078		3.86366	3.80841	3.80841		3.81305	3.81305	3.78414		3.83044	3.82745	3.84229		3.98679	3.94402	3.90419		4.08553	4.092	4.08788		4.76472	4.64436	4.70989		6.57156	6.81127	6.81127		12.763	12.4828	14.1829
5.65204	4.38932	4.13125	4.0105		3.93735	3.88998	3.88998		3.86382	3.80856	3.80856		3.81356	3.81356	3.7851		3.83219	3.8292	3.84467		3.99098	3.94978	3.90949		4.09584	4.1035	4.09943		4.79617	4.67306	4.74251		6.64591	6.89061	6.89061		12.8828	12.6093	14.27
5.65924	4.38866	4.13047	4.01053		3.93782	3.88944	3.88944		3.86378	3.80873	3.80873		3.8137	3.8137	3.78584		3.83374	3.83047	3.8466		3.995	3.95547	3.9143		4.1056	4.11404	4.11016		4.82609	4.70055	4.77383		6.71489	6.96436	6.96436		12.9859	12.719	14.3394
5.66644	4.38802	4.12976	4.01058		3.93836	3.88921	3.88921		3.86369	3.80899	3.80899		3.81337	3.81337	3.78637		3.83507	3.83126	3.84796		3.9989	3.96106	3.91861		4.11491	4.12368	4.12011		4.85448	4.72672	4.80372		6.77846	7.03238	7.03238		13.0723	12.8117	14.3919
5.67364	4.38752	4.12931	4.01068		3.93887	3.88935	3.88935		3.8637	3.80935	3.80935		3.81251	3.81251	3.78678		3.8361	3.83164	3.84868		4.00264	3.96648	3.92244		4.12387	4.1325	4.12935		4.88127	4.75157	4.83204		6.83665	7.09463	7.09463		13.1422	12.8878	14.4284
5.68084	4.38725	4.12924	4.0108		3.93924	3.88989	3.88989		3.86392	3.80983	3.80983		3.81115	3.81115	3.78718		3.83675	3.8317	3.84877		4.00617	3.97162	3.92587		4.1325	4.14067	4.13797		4.90637	4.77511	4.85867		6.88954	7.15121	7.15121		13.196	12.9475	14.4499
5.68804	4.38731	4.12961	4.01095		3.93941	3.89081	3.89081		3.86441	3.81039	3.81039		3.80938	3.80938	3.78765		3.83702	3.83164	3.84827		4.00938	3.97632	3.92901		4.14078	4.14839	4.14609		4.92967	4.7973	4.88344		6.93728	7.20229	7.20229		13.2342	12.9916	14.4574
5.69524	4.38777	4.13035	4.01108		3.93941	3.892	3.892		3.86517	3.81093	3.81093		3.80737	3.80737	3.78827		3.83689	3.8316	3.84728		4.01226	3.98042	3.93196		4.14865	4.15586	4.15376		4.95113	4.81812	4.9062		6.98	7.24801	7.24801		13.2574	13.0209	14.4518
5.70244	4.38864	4.13133	4.01109		3.93932	3.89333	3.89333		3.86614	3.81137	3.81137		3.80535	3.80535	3.78905		3.83644	3.83168	3.84591		4.01477	3.98382	3.9348		4.15603	4.16321	4.161		4.97068	4.83753	4.92686		7.01782	7.28848	7.28848		13.2666	13.0366	14.4337
5.70964	4.38981	4.13239	4.01092		3.93925	3.89463	3.89463		3.8672	3.8116	3.8116		3.80356	3.80356	3.78993		3.83571	3.83197	3.84427		4.01693	3.98647	3.93763		4.16287	4.17041	4.16777		4.9883	4.85549	4.94541		7.05084	7.32372	7.32372		13.2627	13.0395	14.404
5.71684	4.39109	4.13336	4.01049		3.93931	3.89575	3.89575		3.8682	3.8116	3.8116		3.80218	3.80218	3.79076		3.83477	3.83242	3.84249		4.01878	3.98845	3.94049		4.16912	4.17733	4.17398		5.00398	4.87194	4.96191		7.07914	7.35372	7.35372		13.2467	13.0306	14.3632
5.72404	4.39226	4.13406	4.0098		3.93956	3.89656	3.89656		3.86896	3.81137	3.81137		3.80128	3.80128	3.79138		3.83371	3.83291	3.84071		4.02037	3.9899	3.9434		4.17475	4.1838	4.17964		5.01776	4.88681	4.97651		7.10292	7.37846	7.37846		13.2196	13.0108	14.3122
5.73124	4.39314	4.1344	4.00892		3.94003	3.89699	3.89699		3.8693	3.81091	3.81091		3.80085	3.80085	3.79165		3.83263	3.83332	3.83903		4.02175	3.991	3.94624		4.17973	4.18968	4.18475		5.02973	4.90003	4.98939		7.12237	7.39797	7.39797		13.1821	12.9809	14.2513
5.73844	4.39358	4.13433	4.00797		3.94071	3.89699	3.89699		3.86912	3.81032	3.81032		3.80079	3.80079	3.79156		3.83164	3.83346	3.83756		4.02293	3.9919	3.9489		4.1841	4.19481	4.18936		5.04004	4.91161	5.00077		7.13779	7.41241	7.41241		13.1351	12.9419	14.1814
5.74564	4.39349	4.13393	4.00705		3.94155	3.89658	3.89658		3.86835	3.80977	3.80977		3.80094	3.80094	3.79114		3.83083	3.83323	3.83632		4.02391	3.99281	3.95125		4.18787	4.19908	4.19357		5.04888	4.92159	5.01088		7.14944	7.42199	7.42199		13.0794	12.8945	14.1032
5.75284	4.39284	4.13334	4.00623		3.94241	3.89577	3.89577		3.86708	3.80936	3.80936		3.80113	3.80113	3.79043		3.83024	3.83259	3.83536		4.02458	3.99384	3.95324		4.19111	4.20243	4.19747		5.05641	4.93008	5.01991		7.15766	7.4271	7.4271		13.0159	12.8395	14.0176
5.76004	4.39168	4.13272	4.00555		3.94318	3.89462	3.89462		3.86542	3.80917	3.80917		3.80116	3.80116	3.78952		3.82982	3.83157	3.83468		4.02485	3.99508	3.95482		4.19387	4.20492	4.20114		5.06284	4.93722	5.028		7.1628	7.4282	7.4282		12.9453	12.7777	13.9256
5.76724	4.39012	4.1322	4.00502		3.94369	3.89319	3.89319		3.86354	3.80914	3.80914		3.8009	3.8009	3.78848		3.82953	3.83024	3.8343		4.02464	3.99649	3.95601		4.1962	4.20668	4.20469		5.06836	4.94311	5.03524		7.16521	7.42586	7.42586		12.8684	12.7097	13.828
5.77444	4.38834	4.13185	4.00463		3.94388	3.89154	3.89154		3.86159	3.80918	3.80918		3.80031	3.80031	3.78735		3.82931	3.82872	3.83417		4.02398	3.99792	3.95681		4.19817	4.20788	4.20814		5.07312	4.94787	5.04163		7.16516	7.42066	7.42066		12.7858	12.6362	13.7258
5.78164	4.38652	4.13167	4.00438		3.94371	3.8898	3.8898		3.8597	3.8092	3.8092		3.79945	3.79945	3.78616		3.8291	3.82709	3.83424		4.02296	3.99926	3.95726		4.19985	4.20868	4.21141		5.07721	4.95167	5.0472		7.16287	7.41309	7.41309		12.6981	12.558	13.6196
5.78884	4.3848	4.13165	4.00423		3.9432	3.88808	3.88808		3.85796	3.80912	3.80912		3.79843	3.79843	3.78488		3.82882	3.82537	3.83446		4.02175	4.00035	3.95744		4.2013	4.20922	4.21441		5.08068	4.95466	5.05194		7.15846	7.4035	7.4035		12.6063	12.4755	13.5103
5.79604	4.38333	4.13173	4.00412		3.94249	3.8865	3.8865		3.85644	3.80886	3.80886		3.79738	3.79738	3.78341		3.82835	3.82357	3.83469		4.02057	4.00113	3.95747		4.20254	4.2096	4.21697		5.08349	4.95699	5.0559		7.15209	7.39207	7.39207		12.5112	12.3893	13.3985
5.80324	4.38223	4.13184	4.00403		3.94167	3.88515	3.88515		3.85519	3.80836	3.80836		3.7964	3.7964	3.78168		3.82757	3.82167	3.83481		4.01956	4.00152	3.95749		4.20362	4.2099	4.21901		5.08568	4.95881	5.05914		7.14386	7.37886	7.37886		12.4132	12.2998	13.2846
5.81044	4.38155	4.13189	4.00396		3.94085	3.88418	3.88418		3.85419	3.80759	3.80759		3.7956	3.7956	3.7797		3.82644	3.81969	3.83466		4.0189	4.00149	3.95748		4.20453	4.21021	4.22047		5.08726	4.96024	5.06173		7.13388	7.36388	7.36388		12.313	12.2073	13.1691
5.81764	4.38128	4.13181	4.00389		3.94011	3.8837	3.8837		3.8534	3.8066	3.8066		3.795	3.795	3.77754		3.82502	3.81767	3.83412		4.01858	4.00106	3.95744		4.2053	4.21062	4.22134		5.08827	4.9614	5.06381		7.12225	7.34714	7.34714		12.211	12.1121	13.0522
5.82484	4.38134	4.13159	4.00381		3.93949	3.88377	3.88377		3.85277	3.80549	3.80549		3.79463	3.79463	3.77533		3.82342	3.81567	3.83312		4.01855	4.00037	3.9573		4.20593	4.21119	4.22168		5.08872	4.96237	5.06548		7.10912	7.32867	7.32867		12.1077	12.0146	12.934
5.83204	4.38163	4.13123	4.00367		3.93898	3.88436	3.88436		3.85223	3.80434	3.80434		3.79443	3.79443	3.77324		3.82176	3.81382	3.83165		4.01865	3.99954	3.95701		4.20644	4.21197	4.22162		5.08865	4.96323	5.06681		7.09466	7.3086	7.3086		12.0034	11.9151	12.8147
5.83924	4.38201	4.13077	4.00344		3.93854	3.88531	3.88531		3.85176	3.80321	3.80321		3.79429	3.79429	3.77138		3.82012	3.81222	3.82977		4.01872	3.99873	3.95657		4.20685	4.21296	4.22131		5.0881	4.96397	5.06784		7.07905	7.28714	7.28714		11.8986	11.8138	12.6946
5.84644	4.38236	4.13027	4.00311		3.93806	3.88645	3.88645		3.85132	3.80207	3.80207		3.7941	3.7941	3.76987		3.81857	3.81098	3.82757		4.0186	3.99798	3.95598		4.20722	4.2141	4.22094		5.08713	4.96455	5.0685		7.06245	7.2646	7.2646		11.7932	11.7112	12.574
5.85364	4.38252	4.12974	4.0027		3.93747	3.88757	3.88757		3.85085	3.80096	3.80096		3.79374	3.79374	3.7688		3.81724	3.81013	3.82522		4.01822	3.99735	3.95526		4.20762	4.21532	4.22062		5.08578	4.96489	5.06874		7.04497	7.24125	7.24125		11.6875	11.6077	12.453
5.86084	4.38238	4.12924	4.00227		3.9367	3.88845	3.88845		3.85031	3.79994	3.79994		3.79313	3.79313	3.76816		3.81622	3.80964	3.82289		4.01758	3.99685	3.95444		4.20808	4.21655	4.22045		5.08409	4.96491	5.0685		7.0267	7.2174	7.2174		11.5816	11.5036	12.3323
5.86804	4.38187	4.12881	4.00194		3.93575	3.88889	3.88889		3.84962	3.79906	3.79906		3.79226	3.79226	3.76793		3.81556	3.80942	3.82074		4.01672	3.99652	3.95359		4.20862	4.21764	4.22045		5.08202	4.96457	5.06773		7.0078	7.1933	7.1933		11.4757	11.3994	12.2122
5.87524	4.381	4.12856	4.00175		3.93466	3.88874	3.88874		3.84878	3.79836	3.79836		3.79117	3.79117	3.76801		3.81518	3.80933	3.81891		4.01573	3.99638	3.95284		4.20922	4.21846	4.22064		5.07957	4.96385	5.06642		6.98838	7.16911	7.16911		11.37	11.2957	12.0934
5.88244	4.37987	4.12854	4.00176		3.93351	3.88798	3.88798		3.84781	3.79786	3.79786		3.78991	3.78991	3.76827		3.81496	3.80926	3.81745		4.01475	3.99639	3.95231		4.20983	4.21892	4.22099		5.07673	4.96277	5.06461		6.96851	7.14496	7.14496		11.2648	11.1929	11.9763
5.88964	4.37862	4.12881	4.00196		3.93234	3.88671	3.88671		3.84675	3.79757	3.79757		3.78863	3.78863	3.76858		3.81476	3.80911	3.81635		4.01393	3.99643	3.95212		4.21038	4.21904	4.22145		5.07355	4.96137	5.06232		6.94819	7.12093	7.12093		11.1603	11.0912	11.8614
5.89684	4.37736	4.12939	4.00233		3.93123	3.88514	3.88514		3.84561	3.79747	3.79747		3.78742	3.78742	3.76886		3.81448	3.80885	3.81554		4.01334	3.99639	3.95229		4.21079	4.21895	4.22196		5.07015	4.95967	5.05962		6.92744	7.09705	7.09705		11.0566	10.991	11.7487
5.90404	4.37615	4.13026	4.00278		3.93023	3.8835	3.8835		3.84445	3.79754	3.79754		3.78643	3.78643	3.76899		3.81406	3.80852	3.81492		4.01303	3.99624	3.95281		4.21097	4.21883	4.22248		5.06666	4.95777	5.0566		6.90629	7.07336	7.07336		10.9541	10.8923	11.6382
5.91124	4.37508	4.13134	4.00326		3.92939	3.88204	3.88204		3.84325	3.79766	3.79766		3.78574	3.78574	3.76891		3.81344	3.80818	3.81437		4.01298	3.99596	3.95359		4.21089	4.21886	4.22302		5.06317	4.95572	5.05335		6.88487	7.04993	7.04993		10.853	10.7954	11.5299
5.91844	4.37424	4.13251	4.00369		3.92876	3.88098	3.88098		3.8421	3.79772	3.79772		3.7854	3.7854	3.76857		3.81258	3.80792	3.81381		4.01316	3.99559	3.95454		4.21056	4.21918	4.22363		5.05977	4.95362	5.04996		6.8633	7.02679	7.02679		10.7536	10.7001	11.4235
5.92564	4.37369	4.13359	4.00401		3.92835	3.88049	3.88049		3.84101	3.79755	3.79755		3.78532	3.78532	3.76795		3.81148	3.80781	3.81318		4.01359	3.99512	3.95551		4.21004	4.21988	4.22435		5.05652	4.95155	5.04645		6.84173	7.00397	7.00397		10.656	10.6065	11.3189
5.93284	4.37346	4.13445	4.00422		3.92814	3.88062	3.88062		3.84002	3.79705	3.79705		3.78539	3.78539	3.76706		3.81023	3.80788	3.81245		4.01424	3.99458	3.9564		4.20946	4.22097	4.22518		5.05349	4.94953	5.04285		6.82031	6.98144	6.98144		10.5603	10.5143	11.2159
5.94004	4.37351	4.13498	4.00438		3.92811	3.88129	3.88129		3.83919	3.79622	3.79622		3.78544	3.78544	3.76593		3.80892	3.80815	3.81166		4.01509	3.99403	3.95706		4.20896	4.22238	4.22615		5.05072	4.94756	5.03923		6.79926	6.95904	6.95904		10.4666	10.4235	11.1142
5.94724	4.37383	4.13516	4.00452		3.92821	3.88232	3.88232		3.83858	3.79509	3.79509		3.78535	3.78535	3.7646		3.80765	3.80858	3.81085		4.01601	3.99356	3.95738		4.20868	4.22395	4.22724		5.04823	4.94561	5.03567		6.77879	6.93662	6.93662		10.3747	10.334	11.014
5.95444	4.37438	4.13503	4.00469		3.92837	3.88349	3.88349		3.83824	3.79375	3.79375		3.78503	3.78503	3.76317		3.80648	3.80906	3.81011		4.01692	3.99325	3.95725		4.20876	4.22547	4.22843		5.04597	4.94367	5.03228		6.75904	6.91409	6.91409		10.2848	10.2458	10.9151
5.96164	4.37512	4.13471	4.00491		3.92851	3.88452	3.88452		3.83819	3.7923	3.7923		3.78447	3.78447	3.76172		3.80543	3.80949	3.80955		4.01769	3.9931	3.95666		4.20929	4.22674	4.22968		5.04385	4.94176	5.02912		6.74004	6.89146	6.89146		10.1966	10.159	10.8178
5.96884	4.37593	4.13431	4.00514		3.92852	3.8852	3.8852		3.83841	3.79091	3.79091		3.78367	3.78367	3.76033		3.80445	3.80971	3.80919		4.01823	3.99305	3.95569		4.21032	4.22767	4.2309		5.04181	4.93984	5.02627		6.72172	6.86881	6.86881		10.1102	10.0735	10.7219
5.97604	4.37667	4.13395	4.00535		3.92839	3.88539	3.88539		3.83885	3.78971	3.78971		3.78268	3.78268	3.75906		3.80353	3.80962	3.80908		4.01849	3.993	3.95442		4.21185	4.22826	4.23197		5.03984	4.93791	5.02378		6.70395	6.8463	6.8463		10.0253	9.9894	10.6275
5.98324	4.37716	4.13368	4.00547		3.92807	3.88507	3.88507		3.83941	3.78881	3.78881		3.78162	3.78162	3.75792		3.80266	3.80911	3.80918		4.0184	3.99294	3.95298		4.21385	4.22862	4.23281		5.03795	4.93596	5.02164		6.68658	6.82415	6.82415		9.94201	9.90691	10.5343
5.99044	4.37728	4.13356	4.00543		3.92759	3.88431	3.88431		3.83999	3.78824	3.78824		3.78059	3.78059	3.75694		3.80182	3.80813	3.80948		4.01801	3.99286	3.95148		4.21619	4.22885	4.23341		5.03609	4.93404	5.01988		6.66944	6.80259	6.80259		9.86026	9.82609	10.4423
5.99764	4.37703	4.13354	4.00517		3.927	3.88326	3.88326		3.84049	3.78793	3.78793		3.77966	3.77966	3.75614		3.80101	3.80671	3.80988		4.01739	3.99275	3.95004		4.21873	4.2291	4.2338		5.03424	4.93224	5.01842		6.65244	6.78191	6.78191		9.78006	9.74697	10.3516
6.00484	4.37645	4.13353	4.00469		3.9264	3.88207	3.88207		3.84079	3.78776	3.78776		3.77884	3.77884	3.7555		3.80026	3.80489	3.8103		4.01668	3.9926	3.94877		4.22131	4.22947	4.234		5.03239	4.93062	5.0172		6.63553	6.7623	6.7623		9.70148	9.66947	10.2622
6.01204	4.37566	4.13339	4.004		3.92585	3.88091	3.88091		3.84082	3.7876	3.7876		3.77809	3.77809	3.755		3.79957	3.80279	3.81066		4.01608	3.99242	3.94779		4.22377	4.23006	4.23408		5.03055	4.92919	5.01613		6.61874	6.74386	6.74386		9.62461	9.59347	10.1742
6.01924	4.37481	4.13303	4.0032		3.92545	3.87992	3.87992		3.84055	3.78728	3.78728		3.77734	3.77734	3.75465		3.79896	3.80055	3.81088		4.01575	3.99227	3.94716		4.22597	4.23089	4.23411		5.0288	4.92797	5.01518		6.60221	6.72655	6.72655		9.54956	9.51889	10.0878
6.02644	4.37408	4.13243	4.00236		3.92524	3.87918	3.87918		3.84005	3.78671	3.78671		3.77653	3.77653	3.75444		3.79845	3.79834	3.81093		4.01586	3.99222	3.94686		4.22781	4.23191	4.2342		5.02717	4.92697	5.01429		6.58608	6.71021	6.71021		9.47645	9.44563	10.0033
6.03364	4.37366	4.13161	4.00153		3.9252	3.87868	3.87868		3.83936	3.78584	3.78584		3.77563	3.77563	3.75441		3.79809	3.79631	3.81078		4.01645	3.99231	3.94688		4.22927	4.23306	4.23449		5.02574	4.92617	5.01345		6.57049	6.69464	6.69464		9.40538	9.37366	9.92109
6.04084	4.3737	4.13064	4.00077		3.92529	3.87828	3.87828		3.83855	3.78472	3.78472		3.77464	3.77464	3.75451		3.79787	3.79456	3.81044		4.01751	3.99252	3.94717		4.2304	4.23425	4.23506		5.02458	4.92555	5.01264		6.55554	6.67965	6.67965		9.33641	9.30298	9.84131
6.04804	4.37419	4.12959	4.00012		3.92541	3.87786	3.87786		3.8377	3.78345	3.78345		3.77359	3.77359	3.75468		3.79781	3.79314	3.80998		4.01892	3.99282	3.94772		4.23132	4.23546	4.23594		5.02378	4.92508	5.01186		6.54127	6.66509	6.66509		9.26955	9.23364	9.76409
6.05524	4.37501	4.12853	3.99957		3.92548	3.87734	3.87734		3.83688	3.78219	3.78219		3.77252	3.77252	3.75481		3.79784	3.79205	3.80946		4.02055	3.99323	3.94848		4.23217	4.23672	4.23714		5.02338	4.92476	5.01111		6.52766	6.65084	6.65084		9.20469	9.16578	9.6894
6.06244	4.37595	4.12755	3.99915		3.92543	3.87669	3.87669		3.83616	3.78112	3.78112		3.77151	3.77151	3.75484		3.79794	3.79119	3.80898		4.02222	3.99377	3.94939		4.23307	4.2381	4.23865		5.02339	4.92464	5.01043		6.51461	6.63677	6.63677		9.14171	9.09963	9.61704
6.06964	4.37676	4.12669	3.99883		3.92521	3.87595	3.87595		3.83559	3.78041	3.78041		3.77069	3.77069	3.7547		3.79812	3.79048	3.80858		4.0238	3.99454	3.95042		4.23409	4.23965	4.24045		5.02371	4.92482	5.00982		6.50197	6.62286	6.62286		9.08045	9.03541	9.5468
6.07684	4.37722	4.12596	3.99861		3.92482	3.87517	3.87517		3.83522	3.78014	3.78014		3.77015	3.77015	3.75437		3.79837	3.78982	3.8083		4.02516	3.9955	3.95151		4.23527	4.2414	4.24249		5.02425	4.92536	5.00929		6.48956	6.60906	6.60906		9.02073	8.97331	9.47842
6.08404	4.37717	4.12533	3.99844		3.92428	3.87443	3.87443		3.83508	3.78036	3.78036		3.76997	3.76997	3.75384		3.79863	3.78916	3.80816		4.02622	3.99666	3.9527		4.23658	4.24335	4.24466		5.02484	4.92634	5.00889		6.47722	6.59547	6.59547		8.96239	8.91343	9.41168
6.09124	4.37649	4.12477	3.99833		3.92368	3.87385	3.87385		3.83514	3.78099	3.78099		3.77013	3.77013	3.75315		3.79885	3.78857	3.80815		4.02699	3.998	3.95402		4.23799	4.24546	4.24686		5.02531	4.92777	5.00868		6.46488	6.58222	6.58222		8.90535	8.85574	9.34646
6.09844	4.37519	4.12421	3.99828		3.92312	3.87352	3.87352		3.83536	3.7819	3.7819		3.77058	3.77058	3.75237		3.79893	3.78808	3.80821		4.02751	3.99952	3.95547		4.2394	4.24766	4.24902		5.0255	4.92964	5.00874		6.45252	6.5694	6.5694		8.84954	8.80012	9.28276
6.10564	4.37335	4.12364	3.99825		3.92268	3.87345	3.87345		3.83566	3.78291	3.78291		3.77121	3.77121	3.75165		3.79881	3.78782	3.80827		4.02794	4.0012	3.95708		4.24073	4.24984	4.25112		5.02534	4.9319	5.00911		6.44017	6.55709	6.55709		8.79501	8.74645	9.2207
6.11284	4.3712	4.12304	3.99821		3.92243	3.87359	3.87359		3.83595	3.78387	3.78387		3.77192	3.77192	3.75111		3.79847	3.78787	3.80827		4.0284	4.00298	3.95885		4.24197	4.2519	4.25319		5.02484	4.93445	5.00979		6.42793	6.54535	6.54535		8.7418	8.69452	9.16048
6.12004	4.36899	4.12242	3.99812		3.92243	3.87381	3.87381		3.83619	3.78464	3.78464		3.77262	3.77262	3.7508		3.79795	3.7883	3.80813		4.02905	4.00479	3.96075		4.24317	4.25376	4.25528		5.02415	4.93715	5.0108		6.41597	6.53422	6.53422		8.68993	8.64413	9.10222
6.12724	4.36701	4.12185	3.99797		3.92266	3.87399	3.87399		3.83629	3.78515	3.78515		3.77321	3.77321	3.75073		3.79726	3.78917	3.80785		4.02992	4.00658	3.96277		4.24442	4.25543	4.25746		5.02349	4.9398	5.01209		6.40443	6.52367	6.52367		8.63943	8.59498	9.04598
6.13444	4.36545	4.12138	3.99773		3.9231	3.87402	3.87402		3.83621	3.78537	3.78537		3.77366	3.77366	3.75082		3.79647	3.79045	3.8074		4.03109	4.00832	3.96487		4.24587	4.25697	4.25985		5.02312	4.94224	5.01365		6.39349	6.51367	6.51367		8.59029	8.54684	8.99172
6.14164	4.3645	4.12105	3.99745		3.92365	3.87381	3.87381		3.83593	3.78537	3.78537		3.77395	3.77395	3.75097		3.7957	3.79208	3.80678		4.03256	4.01006	3.96699		4.24765	4.2585	4.26256		5.02328	4.94438	5.01545		6.38323	6.50403	6.50403		8.54254	8.49953	8.93927
6.14884	4.36424	4.12088	3.99715		3.92421	3.87335	3.87335		3.83548	3.78524	3.78524		3.77411	3.77411	3.75109		3.79508	3.79391	3.80604		4.03436	4.01186	3.96907		4.24982	4.26015	4.26571		5.02416	4.94624	5.01747		6.37372	6.49461	6.49461		8.49622	8.45306	8.88843
6.15604	4.36468	4.12091	3.99686		3.92467	3.87272	3.87272		3.83495	3.7851	3.7851		3.77415	3.77415	3.75106		3.7948	3.7958	3.80523		4.03641	4.01378	3.97105		4.25246	4.26205	4.26931		5.02588	4.94787	5.01968		6.36489	6.48524	6.48524		8.45139	8.40744	8.83894
6.16324	4.36571	4.12117	3.99666		3.92495	3.87202	3.87202		3.8344	3.78506	3.78506		3.77412	3.77412	3.75083		3.79493	3.79766	3.80444		4.0386	4.01582	3.97293		4.25552	4.26432	4.27333		5.02844	4.94931	5.02205		6.35664	6.47585	6.47585		8.40808	8.3628	8.79057
6.17044	4.36713	4.12168	3.99655		3.92501	3.87138	3.87138		3.83388	3.78516	3.78516		3.77409	3.77409	3.75033		3.79552	3.79942	3.80377		4.0408	4.01798	3.97475		4.25892	4.26701	4.27763		5.03174	4.9507	5.02458		6.34884	6.46653	6.46653		8.3663	8.31929	8.74314
6.17764	4.36869	4.12238	3.99653		3.92485	3.87095	3.87095		3.83338	3.78548	3.78548		3.77406	3.77406	3.74956		3.79652	3.8011	3.80331		4.04288	4.02021	3.97653		4.26256	4.2701	4.28213		5.03556	4.9521	5.02721		6.3414	6.45741	6.45741		8.32606	8.27712	8.69659
6.18484	4.37016	4.12317	3.99662		3.92452	3.87081	3.87081		3.83292	3.78602	3.78602		3.77405	3.77405	3.74857		3.79784	3.80266	3.80315		4.04482	4.02247	3.97829		4.26627	4.27356	4.28671		5.03967	4.95365	5.02991		6.33427	6.44869	6.44869		8.28732	8.2365	8.65098
6.19204	4.37137	4.12393	3.99678		3.92406	3.87099	3.87099		3.83251	3.78672	3.78672		3.77402	3.77402	3.74749		3.79941	3.80411	3.80343		4.04661	4.0247	3.98		4.26996	4.2773	4.2913		5.04387	4.9554	5.03263		6.32747	6.4406	6.4406		8.25001	8.19756	8.60638
6.19924	4.37222	4.12458	3.99705		3.92358	3.87149	3.87149		3.83216	3.78748	3.78748		3.77397	3.77397	3.74645		3.80117	3.80543	3.80419		4.04825	4.02688	3.98164		4.27358	4.28124	4.29586		5.04802	4.95741	5.03531		6.32104	6.43337	6.43337		8.21398	8.16029	8.56288
6.20644	4.37265	4.12506	3.99739		3.92317	3.87225	3.87225		3.83189	3.78819	3.78819		3.7739	3.7739	3.74557		3.80302	3.80669	3.80546		4.04978	4.029	3.98321		4.27712	4.28529	4.30039		5.05205	4.95965	5.03789		6.31508	6.42713	6.42713		8.17902	8.12463	8.52052
6.21364	4.37267	4.12534	3.99781		3.92291	3.87319	3.87319		3.83165	3.78876	3.78876		3.77387	3.77387	3.74494		3.80486	3.80791	3.80719		4.05127	4.03103	3.9847		4.2806	4.28939	4.30487		5.05596	4.96212	5.04036		6.30969	6.42191	6.42191		8.1449	8.0904	8.47938
6.22084	4.37232	4.1254	3.99829		3.92286	3.87425	3.87425		3.83146	3.78918	3.78918		3.77393	3.77393	3.74461		3.80662	3.80912	3.80931		4.05283	4.03299	3.98606		4.28405	4.29352	4.30931		5.05974	4.96486	5.04275		6.30498	6.4176	6.4176		8.11142	8.0574	8.43953
6.22804	4.37173	4.12523	3.99882		3.92299	3.87537	3.87537		3.8313	3.7894	3.7894		3.77414	3.77414	3.74461		3.8083	3.81033	3.81168		4.05457	4.03493	3.98729		4.28756	4.29772	4.31375		5.06347	4.96788	5.04512		6.30102	6.41403	6.41403		8.07852	8.0254	8.40101
6.23524	4.37099	4.12482	3.99941		3.92326	3.8765	3.8765		3.83117	3.78937	3.78937		3.77451	3.77451	3.74493		3.8099	3.81155	3.8141		4.05657	4.03694	3.98839		4.29122	4.30203	4.31813		5.06716	4.97125	5.04755		6.29781	6.41097	6.41097		8.04623	7.99419	8.36385
6.24244	4.37019	4.12422	4.00004		3.92361	3.87764	3.87764		3.83111	3.78909	3.78909		3.77504	3.77504	3.74548		3.81144	3.81277	3.8164		4.05887	4.03907	3.98943		4.29515	4.30648	4.3224		5.07085	4.97497	5.05015		6.29528	6.40817	6.40817		8.01468	7.96363	8.32801
6.24964	4.36936	4.12347	4.00067		3.92398	3.87874	3.87874		3.83111	3.78855	3.78855		3.7757	3.7757	3.74614		3.8129	3.81399	3.81839		4.06145	4.0414	3.99057		4.2994	4.31103	4.32644		5.07451	4.97903	5.05306		6.29332	6.40544	6.40544		7.98405	7.93371	8.29344
6.25684	4.36851	4.12264	4.00119		3.9243	3.8798	3.8798		3.83117	3.78785	3.78785		3.7765	3.7765	3.74676		3.81424	3.81517	3.81998		4.06433	4.04389	3.99193		4.30398	4.31566	4.33017		5.07815	4.9834	5.05635		6.29176	6.40269	6.40269		7.95456	7.90442	8.26014
6.26404	4.36766	4.12174	4.0015		3.92454	3.88078	3.88078		3.83127	3.78702	3.78702		3.77738	3.77738	3.74723		3.81545	3.81626	3.82113		4.06748	4.04654	3.99365		4.30887	4.32035	4.33359		5.08177	4.98803	5.06011		6.29047	6.39988	6.39988		7.9264	7.87579	8.22806
6.27124	4.36687	4.12078	4.00156		3.92464	3.88162	3.88162		3.8314	3.7861	3.7861		3.77825	3.77825	3.74748		3.81657	3.81719	3.8219		4.07088	4.04937	3.99585		4.31402	4.32506	4.3368		5.08544	4.99276	5.06436		6.28934	6.39708	6.39708		7.89973	7.84786	8.19719
6.27844	4.36621	4.11976	4.00137		3.92465	3.88227	3.88227		3.83157	3.78515	3.78515		3.77901	3.77901	3.7475		3.81764	3.81789	3.82237		4.07447	4.0524	3.99855		4.31941	4.32975	4.33993		5.08927	4.99747	5.06901		6.2883	6.39436	6.39436		7.87454	7.82068	8.16746
6.28564	4.36576	4.11872	4.00098		3.92459	3.88266	3.88266		3.83177	3.78421	3.78421		3.77956	3.77956	3.74735		3.81863	3.81833	3.82267		4.0782	4.05569	4.00178		4.32494	4.3344	4.3431		5.09334	5.00202	5.07396		6.28737	6.39185	6.39185		7.85077	7.79439	8.13878
6.29284	4.36558	4.11772	4.00046		3.92454	3.88275	3.88275		3.83202	3.78338	3.78338		3.77987	3.77987	3.74712		3.81954	3.81851	3.82292		4.08202	4.05926	4.00544		4.3305	4.33898	4.34648		5.09779	5.00637	5.07911		6.28659	6.38969	6.38969		7.82821	7.76906	8.11108
6.30004	4.36572	4.11685	3.99994		3.92453	3.88255	3.88255		3.8323	3.78272	3.78272		3.77993	3.77993	3.74694		3.82041	3.81851	3.82324		4.08594	4.06312	4.00943		4.33595	4.34356	4.3502		5.10268	5.01053	5.08433		6.28604	6.38801	6.38801		7.80654	7.74477	8.08436
6.30724	4.36621	4.11618	3.99955		3.92459	3.88209	3.88209		3.83257	3.78228	3.78228		3.77971	3.77971	3.74694		3.82131	3.81838	3.82372		4.08994	4.06725	4.01356		4.34114	4.34825	4.35441		5.10804	5.0146	5.08952		6.28574	6.3869	6.3869		7.78548	7.72156	8.05864
6.31444	4.367	4.11572	3.99942		3.92472	3.88145	3.88145		3.83285	3.78209	3.78209		3.7792	3.7792	3.74721		3.8223	3.81826	3.82439		4.09399	4.07168	4.01766		4.34605	4.35313	4.35916		5.11383	5.01872	5.0946		6.28573	6.38642	6.38642		7.76475	7.69947	8.03394
6.32164	4.36795	4.11548	3.99968		3.92492	3.8807	3.8807		3.83317	3.78212	3.78212		3.7784	3.7784	3.7478		3.8234	3.8182	3.82525		4.09808	4.07637	4.02158		4.35066	4.35827	4.3644		5.11993	5.02304	5.09956		6.28603	6.38653	6.38653		7.7442	7.67856	8.01021
6.32884	4.36891	4.11546	4.0004		3.92518	3.87993	3.87993		3.83353	3.78241	3.78241		3.77738	3.77738	3.74869		3.8246	3.81826	3.82627		4.10222	4.0812	4.02526		4.35502	4.3637	4.37003		5.12623	5.02774	5.10445		6.28657	6.3872	6.3872		7.7238	7.65884	7.98736
6.33604	4.36973	4.11569	4.00155		3.92545	3.87923	3.87923		3.83393	3.78292	3.78292		3.77628	3.77628	3.74982		3.82591	3.81849	3.82745		4.10647	4.08603	4.02865		4.35917	4.36937	4.37592		5.13261	5.033	5.10938		6.2873	6.38839	6.38839		7.70363	7.64028	7.96527
6.34324	4.37028	4.11624	4.00304		3.92573	3.87861	3.87861		3.83431	3.7836	3.7836		3.77521	3.77521	3.75111		3.82735	3.81889	3.82882		4.11084	4.09064	4.03182		4.36321	4.37523	4.38194		5.13898	5.03892	5.11446		6.28815	6.39004	6.39004		7.68388	7.62271	7.94386
6.35044	4.37046	4.11705	4.00472		3.92598	3.87815	3.87815		3.83466	3.78436	3.78436		3.7743	3.7743	3.75245		3.82898	3.8195	3.83042		4.11528	4.09489	4.03484		4.36726	4.38119	4.38803		5.14528	5.04555	5.11978		6.28904	6.39208	6.39208		7.66478	7.60594	7.92307
6.35764	4.37021	4.11807	4.00641		3.92624	3.87787	3.87787		3.83496	3.78516	3.78516		3.7736	3.7736	3.75378		3.83081	3.82032	3.83224		4.11977	4.0987	4.03777		4.37146	4.38714	4.39413		5.15149	5.05282	5.12536		6.28994	6.39446	6.39446		7.64657	7.58983	7.90289
6.36484	4.36957	4.11919	4.00791		3.92652	3.87779	3.87779		3.83525	3.78591	3.78591		3.7732	3.7732	3.75502		3.83281	3.82137	3.83431		4.12423	4.10206	4.04071		4.37599	4.39298	4.40018		5.1577	5.06065	5.13119		6.29087	6.39713	6.39713		7.62941	7.57428	7.88335
6.37204	4.3687	4.12031	4.00903		3.92686	3.8779	3.8779		3.83556	3.78656	3.78656		3.77315	3.77315	3.75614		3.8349	3.82271	3.83662		4.12862	4.10504	4.04368		4.38095	4.39864	4.40618		5.16402	5.06888	5.13726		6.29191	6.40013	6.40013		7.61337	7.55917	7.86449
6.37924	4.3678	4.12136	4.00968		3.92724	3.87821	3.87821		3.83592	3.78713	3.78713		3.77348	3.77348	3.75711		3.83707	3.82439	3.83914		4.13284	4.10779	4.04676		4.38639	4.40414	4.41217		5.17054	5.07736	5.14357		6.29313	6.40352	6.40352		7.59836	7.5444	7.8464
6.38644	4.36706	4.12223	4.00982		3.92768	3.87871	3.87871		3.83633	3.7876	3.7876		3.77415	3.77415	3.75795		3.83934	3.82649	3.84176		4.13684	4.1105	4.05		4.39228	4.40955	4.41818		5.17733	5.08589	5.15008		6.29466	6.40737	6.40737		7.58423	7.52985	7.82917
6.39364	4.36659	4.12278	4.00949		3.92818	3.8794	3.8794		3.8368	3.78801	3.78801		3.77506	3.77506	3.75869		3.84173	3.82905	3.84439		4.14054	4.11343	4.05346		4.39855	4.41499	4.42426		5.18441	5.0943	5.15676		6.29655	6.41173	6.41173		7.57074	7.51551	7.81283
6.40084	4.3665	4.1229	4.00878		3.92876	3.8803	3.8803		3.83736	3.78838	3.78838		3.77609	3.77609	3.75933		3.84421	3.83208	3.84691		4.14395	4.11679	4.05715		4.40515	4.42058	4.43043		5.19178	5.10244	5.16357		6.29888	6.41655	6.41655		7.55771	7.50143	7.79741
6.40804	4.3668	4.12258	4.00783		3.92941	3.88134	3.88134		3.838	3.78876	3.78876		3.77713	3.77713	3.7599		3.84675	3.83551	3.84926		4.14714	4.12073	4.06107		4.41202	4.42643	4.43669		5.19947	5.11019	5.17053		6.30173	6.42174	6.42174		7.545	7.48772	7.78285
6.41524	4.3675	4.12186	4.00679		3.93013	3.88244	3.88244		3.8387	3.78919	3.78919		3.77815	3.77815	3.76044		3.84933	3.83918	3.85144		4.15019	4.12523	4.06522		4.41912	4.43262	4.44308		5.20752	5.11751	5.17771		6.30521	6.42717	6.42717		7.53253	7.47445	7.76905
6.42244	4.36847	4.12086	4.00583		3.93088	3.88348	3.88348		3.83938	3.78963	3.78963		3.77911	3.77911	3.76095		3.85189	3.84291	3.85348		4.15325	4.13018	4.0696		4.42634	4.43922	4.44962		5.21592	5.12444	5.18515		6.30939	6.43266	6.43266		7.52031	7.46163	7.75595
6.42964	4.36952	4.11972	4.00509		3.93162	3.88438	3.88438		3.83996	3.79001	3.79001		3.78003	3.78003	3.76147		3.85439	3.8465	3.85543		4.15644	4.13545	4.07419		4.43361	4.44621	4.45637		5.22463	5.13108	5.19289		6.31425	6.43807	6.43807		7.50843	7.44926	7.74346
6.43684	4.37046	4.11866	4.00459		3.93236	3.88505	3.88505		3.84041	3.79027	3.79027		3.7809	3.7809	3.762		3.85674	3.84975	3.85734		4.1599	4.14082	4.07892		4.4409	4.45353	4.4633		5.23358	5.1376	5.20091		6.31971	6.44327	6.44327		7.49699	7.43743	7.73152
6.44404	4.37113	4.11785	4.00432		3.93306	3.88543	3.88543		3.84073	3.79029	3.79029		3.78175	3.78175	3.76251		3.85885	3.8525	3.85932		4.16372	4.14611	4.08373		4.44822	4.4611	4.47038		5.24273	5.14414	5.20915		6.32566	6.44823	6.44823		7.48612	7.42623	7.72007
6.45124	4.37147	4.11745	4.00419		3.93369	3.88551	3.88551		3.84092	3.79004	3.79004		3.78265	3.78265	3.76295		3.8606	3.85466	3.86142		4.16796	4.15115	4.08852		4.45558	4.46881	4.47761		5.25203	5.15086	5.21755		6.33203	6.45295	6.45295		7.47586	7.41573	7.70907
6.45844	4.37149	4.11752	4.00413		3.93418	3.88528	3.88528		3.84098	3.78954	3.78954		3.78367	3.78367	3.76328		3.86197	3.85619	3.86369		4.17259	4.15581	4.09322		4.46299	4.47655	4.48494		5.26145	5.15785	5.22605		6.3387	6.45753	6.45753		7.46626	7.40591	7.69852
6.46564	4.37124	4.11806	4.0041		3.93449	3.88479	3.88479		3.84085	3.78883	3.78883		3.78481	3.78481	3.76351		3.863	3.85716	3.86611		4.17759	4.16009	4.09783		4.4704	4.48425	4.49236		5.27086	5.16514	5.23459		6.34556	6.46213	6.46213		7.45733	7.39668	7.68844
6.47284	4.37083	4.11904	4.00406		3.93463	3.88417	3.88417		3.8405	3.78799	3.78799		3.78606	3.78606	3.7636		3.86385	3.85769	3.8686		4.18285	4.16412	4.10233		4.47776	4.49188	4.49982		5.28018	5.17275	5.24305		6.35242	6.46694	6.46694		7.44906	7.38794	7.6788
6.48004	4.37038	4.12039	4.00395		3.93462	3.88354	3.88354		3.8399	3.78714	3.78714		3.78731	3.78731	3.76357		3.86474	3.858	3.8711		4.18826	4.16809	4.10681		4.48511	4.49943	4.50727		5.28935	5.1806	5.25133		6.35915	6.47206	6.47206		7.44145	7.37966	7.66957
6.48724	4.37005	4.12202	4.0038		3.93451	3.88308	3.88308		3.83909	3.7864	3.7864		3.78849	3.78849	3.7634		3.86587	3.85831	3.87354		4.19375	4.17219	4.11132		4.49248	4.50696	4.51472		5.29839	5.18863	5.25938		6.36572	6.47762	6.47762		7.4345	7.37182	7.66071
6.49444	4.36995	4.12375	4.00362		3.93434	3.88285	3.88285		3.83809	3.78587	3.78587		3.7895	3.7895	3.76316		3.86741	3.85887	3.87593		4.19927	4.17659	4.1159		4.49995	4.51452	4.52219		5.30741	5.19673	5.26726		6.3722	6.48358	6.48358		7.42821	7.36443	7.65222
6.50164	4.37011	4.12543	4.00348		3.93412	3.8829	3.8829		3.83695	3.78562	3.78562		3.79031	3.79031	3.76292		3.86945	3.85983	3.87822		4.20479	4.18139	4.12058		4.50757	4.52218	4.52977		5.31653	5.20483	5.27505		6.37867	6.48991	6.48991		7.42255	7.3575	7.64416
6.50884	4.37047	4.12698	4.00344		3.93388	3.88323	3.88323		3.83576	3.78567	3.78567		3.79092	3.79092	3.76279		3.87199	3.8613	3.8804		4.21036	4.18666	4.12536		4.51542	4.52999	4.53755		5.32585	5.2129	5.28292		6.3852	6.49656	6.49656		7.41751	7.35107	7.63662
6.51604	4.371	4.12838	4.00354		3.93367	3.8838	3.8838		3.83464	3.78597	3.78597		3.79134	3.79134	3.76285		3.87496	3.86334	3.88244		4.21598	4.19241	4.13021		4.52352	4.53801	4.54555		5.33547	5.22096	5.29099		6.39184	6.50353	6.50353		7.41302	7.34527	7.62964
6.52324	4.37161	4.12967	4.00379		3.9335	3.88457	3.88457		3.83375	3.7865	3.7865		3.7916	3.7916	3.76317		3.87819	3.86595	3.88433		4.22163	4.19858	4.13512		4.5319	4.54627	4.55382		5.34548	5.22912	5.29941		6.39863	6.51083	6.51083		7.40899	7.34022	7.62324
6.53044	4.37222	4.13084	4.00411		3.93333	3.88547	3.88547		3.83321	3.78722	3.78722		3.79179	3.79179	3.76382		3.88148	3.86906	3.88609		4.22731	4.205	4.14004		4.54057	4.55478	4.56235		5.35595	5.23747	5.30828		6.40565	6.51848	6.51848		7.4053	7.336	7.61741
6.53764	4.37277	4.13187	4.00448		3.93313	3.88639	3.88639		3.83312	3.78805	3.78805		3.79201	3.79201	3.76486		3.88462	3.87253	3.88772		4.233	4.21157	4.1449		4.54946	4.56352	4.57112		5.36689	5.2461	5.31767		6.41297	6.52652	6.52652		7.40187	7.33257	7.61212
6.54484	4.37321	4.13274	4.00484		3.93288	3.88727	3.88727		3.83347	3.78892	3.78892		3.79238	3.79238	3.76632		3.88747	3.87617	3.88928		4.23869	4.21817	4.14969		4.5585	4.57243	4.58008		5.37818	5.25506	5.32758		6.42068	6.53504	6.53504		7.39863	7.32983	7.60736
6.55204	4.37353	4.13348	4.00513		3.93257	3.88804	3.88804		3.83421	3.78972	3.78972		3.79297	3.79297	3.76815		3.89	3.87978	3.89081		4.24435	4.22477	4.15439		4.56756	4.58148	4.58918		5.38967	5.26441	5.33791		6.42883	6.5441	6.5441		7.39562	7.32759	7.60309
6.55924	4.37381	4.13412	4.00537		3.93224	3.88871	3.88871		3.83529	3.79041	3.79041		3.79381	3.79381	3.77023		3.89223	3.88325	3.8924		4.24997	4.23139	4.15908		4.57656	4.5906	4.59838		5.40119	5.27422	5.34854		6.43747	6.55373	6.55373		7.39294	7.32563	7.59917
6.56644	4.37413	4.13464	4.00553		3.93195	3.88933	3.88933		3.83663	3.79098	3.79098		3.79489	3.79489	3.77242		3.89426	3.88654	3.89416		4.25561	4.23807	4.16385		4.58545	4.59972	4.60766		5.41265	5.28449	5.35939		6.44665	6.56389	6.56389		7.3907	7.32374	7.59552
6.57364	4.37455	4.13499	4.00565		3.93173	3.88992	3.88992		3.83808	3.79143	3.79143		3.79615	3.79615	3.77462		3.89624	3.88961	3.89621		4.2614	4.24485	4.16877		4.59421	4.60877	4.61702		5.42399	5.29518	5.37041		6.45635	6.57443	6.57443		7.38906	7.32178	7.592
6.58084	4.37507	4.13512	4.00576		3.93165	3.89053	3.89053		3.83952	3.7918	3.7918		3.79754	3.79754	3.77671		3.89829	3.8925	3.89869		4.26748	4.25179	4.17393		4.6029	4.61769	4.62648		5.43522	5.30616	5.38162		6.4665	6.58522	6.58522		7.38813	7.31975	7.58861
6.58804	4.37568	4.13507	4.00589		3.93177	3.89112	3.89112		3.84084	3.79211	3.79211		3.79901	3.79901	3.77858		3.90052	3.89525	3.90162		4.27393	4.25892	4.17933		4.61156	4.62646	4.63606		5.44634	5.31732	5.39303		6.47697	6.59611	6.59611		7.38797	7.31763	7.58541
6.59524	4.37636	4.1349	4.00609		3.93217	3.89166	3.89166		3.84197	3.79243	3.79243		3.8005	3.8005	3.78014		3.90298	3.89798	3.90497		4.28076	4.26621	4.18499		4.62022	4.63511	4.64575		5.45743	5.32856	5.40464		6.48757	6.60694	6.60694		7.38851	7.31553	7.58251
6.60244	4.37707	4.13473	4.00643		3.93285	3.8921	3.8921		3.8429	3.79283	3.79283		3.802	3.802	3.78135		3.9057	3.90081	3.90863		4.28791	4.27358	4.19089		4.62893	4.64371	4.65554		5.46859	5.33981	5.4164		6.49806	6.61761	6.61761		7.38961	7.31355	7.58
6.60964	4.37775	4.13461	4.00689		3.93373	3.89243	3.89243		3.84365	3.79337	3.79337		3.8035	3.8035	3.78225		3.90866	3.90382	3.91245		4.29527	4.28088	4.197		4.63772	4.65234	4.6654		5.47997	5.35102	5.42825		6.50825	6.62806	6.62806		7.39104	7.31183	7.57796
6.61684	4.37834	4.13457	4.00748		3.93474	3.89267	3.89267		3.84424	3.79407	3.79407		3.80498	3.80498	3.78295		3.91185	3.90703	3.91625		4.30275	4.28793	4.20327		4.64664	4.66106	4.67526		5.4916	5.36219	5.44007		6.51799	6.63835	6.63835		7.39252	7.3105	7.57642
6.62404	4.37879	4.13463	4.00817		3.93574	3.89279	3.89279		3.84473	3.79487	3.79487		3.80648	3.80648	3.78352		3.91519	3.9104	3.91989		4.31018	4.29461	4.2096		4.65573	4.66992	4.68509		5.50351	5.37336	5.45177		6.5273	6.64856	6.64856		7.39384	7.30962	7.57544
6.63124	4.37909	4.13479	4.00894		3.93664	3.89281	3.89281		3.8452	3.79568	3.79568		3.80803	3.80803	3.78407		3.91861	3.91389	3.92327		4.31743	4.30083	4.21588		4.66505	4.67899	4.6949		5.51564	5.38456	5.46321		6.5363	6.65884	6.65884		7.39482	7.30925	7.57502
6.63844	4.3793	4.13503	4.00982		3.93731	3.89273	3.89273		3.84572	3.79643	3.79643		3.80968	3.80968	3.78463		3.92205	3.91749	3.92634		4.3244	4.30659	4.22207		4.67463	4.68828	4.70475		5.52793	5.3959	5.47437		6.54521	6.66928	6.66928		7.39543	7.3094	7.57519
6.64564	4.37943	4.13532	4.0108		3.93769	3.8926	3.8926		3.84634	3.79711	3.79711		3.81145	3.81145	3.78527		3.92542	3.92115	3.92911		4.33109	4.31199	4.22818		4.68452	4.69778	4.71471		5.54031	5.40743	5.48528		6.55427	6.67997	6.67997		7.3957	7.31013	7.57589
6.65284	4.37954	4.13564	4.01187		3.93775	3.8925	3.8925		3.84703	3.79778	3.79778		3.81331	3.81331	3.78605		3.92867	3.92486	3.9317		4.33764	4.31721	4.23429		4.69478	4.70742	4.72482		5.55276	5.41918	5.49605		6.56369	6.69095	6.69095		7.39579	7.31149	7.57705
6.66004	4.37967	4.13596	4.01298		3.93758	3.89247	3.89247		3.84777	3.79851	3.79851		3.81522	3.81522	3.78704		3.93173	3.92858	3.93425		4.34422	4.32248	4.24049		4.70542	4.71717	4.73506		5.56523	5.43113	5.50685		6.57366	6.70223	6.70223		7.39594	7.31345	7.57859
6.66724	4.37989	4.13626	4.01409		3.93739	3.8925	3.8925		3.84853	3.79943	3.79943		3.81711	3.81711	3.78825		3.93457	3.93231	3.93687		4.351	4.32805	4.24684		4.71637	4.72698	4.74541		5.57774	5.44322	5.51782		6.5843	6.71376	6.71376		7.39639	7.31594	7.58047
6.67444	4.38023	4.13656	4.01519		3.93734	3.89253	3.89253		3.8493	3.80063	3.80063		3.81895	3.81895	3.78971		3.93721	3.93608	3.93968		4.35806	4.33414	4.25341		4.72749	4.73689	4.75582		5.59033	5.45532	5.52908		6.59562	6.7255	6.7255		7.39737	7.31889	7.58264
6.68164	4.38071	4.13687	4.01624		3.93759	3.89253	3.89253		3.85008	3.80222	3.80222		3.82071	3.82071	3.79142		3.93973	3.93987	3.94275		4.3654	4.34087	4.26025		4.73863	4.74697	4.7663		5.60303	5.46734	5.54067		6.60753	6.73738	6.73738		7.39903	7.32221	7.58511
6.68884	4.38133	4.13722	4.01724		3.9382	3.89255	3.89255		3.85088	3.80424	3.80424		3.82237	3.82237	3.79339		3.94222	3.94368	3.94612		4.37304	4.34825	4.2674		4.74959	4.7573	4.77679		5.6159	5.47922	5.55261		6.61983	6.74938	6.74938		7.40143	7.32577	7.58785
6.69604	4.38204	4.13765	4.01815		3.93918	3.89259	3.89259		3.85174	3.80663	3.80663		3.82392	3.82392	3.79564		3.94477	3.94743	3.94983		4.38091	4.3562	4.27487		4.76021	4.76795	4.78722		5.62895	5.49094	5.56484		6.63233	6.76149	6.76149		7.40454	7.32942	7.59082
6.70324	4.3828	4.13814	4.01894		3.94044	3.89273	3.89273		3.85267	3.80924	3.80924		3.82537	3.82537	3.79812		3.9475	3.9511	3.95387		4.38893	4.36453	4.28259		4.7704	4.77899	4.79758		5.64219	5.50254	5.57729		6.64491	6.7737	6.7737		7.40835	7.33295	7.59394
6.71044	4.38353	4.13867	4.01961		3.94184	3.89302	3.89302		3.85376	3.81184	3.81184		3.8268	3.8268	3.80074		3.95052	3.9547	3.9582		4.39699	4.37301	4.29044		4.78016	4.7904	4.80791		5.65563	5.5141	5.58988		6.65752	6.786	6.786		7.41282	7.33631	7.59715
6.71764	4.38415	4.13924	4.0202		3.94319	3.8935	3.8935		3.85499	3.81422	3.81422		3.82829	3.82829	3.80337		3.95387	3.9583	3.96277		4.40497	4.38147	4.29829		4.78955	4.80214	4.8183		5.66924	5.5257	5.60256		6.67022	6.79837	6.79837		7.41788	7.33955	7.60042
6.72484	4.38458	4.13986	4.02076		3.94434	3.89423	3.89423		3.85632	3.81623	3.81623		3.82993	3.82993	3.80586		3.95754	3.96191	3.96751		4.41282	4.38977	4.30609		4.79873	4.81418	4.8289		5.68302	5.53743	5.61531		6.6831	6.81077	6.81077		7.42344	7.34285	7.60377
6.73204	4.3848	4.14052	4.0213		3.9452	3.89523	3.89523		3.85764	3.81778	3.81778		3.83173	3.83173	3.80808		3.96143	3.96556	3.97232		4.42058	4.39789	4.31377		4.80789	4.82645	4.83978		5.69698	5.5494	5.62811		6.69625	6.82315	6.82315		7.42938	7.34634	7.6072
6.73924	4.38483	4.14121	4.02183		3.9458	3.89648	3.89648		3.85884	3.81888	3.81888		3.8337	3.8337	3.80997		3.96544	3.96925	3.9771		4.42832	4.40583	4.32133		4.81724	4.83886	4.85096		5.7111	5.56172	5.64094		6.70973	6.83545	6.83545		7.4356	7.35009	7.61074
6.74644	4.38474	4.14189	4.02237		3.94624	3.89795	3.89795		3.85983	3.81961	3.81961		3.83582	3.83582	3.81151		3.96953	3.97294	3.98178		4.43614	4.41371	4.32877		4.82696	4.85135	4.86242		5.7254	5.57448	5.65377		6.72357	6.84767	6.84767		7.442	7.35416	7.61434
6.75364	4.38461	4.14252	4.02293		3.94664	3.89956	3.89956		3.86055	3.82008	3.82008		3.83804	3.83804	3.81277		3.97368	3.97658	3.9863		4.44413	4.42165	4.33612		4.83715	4.86388	4.87416		5.73993	5.58767	5.66659		6.73779	6.8598	6.8598		7.44843	7.35859	7.61792
6.76084	4.38457	4.14305	4.02351		3.9471	3.90127	3.90127		3.86095	3.82044	3.82044		3.84034	3.84034	3.8138		3.9779	3.98017	3.99065		4.45234	4.4298	4.34345		4.84786	4.87648	4.88616		5.75472	5.60129	5.67939		6.75238	6.87197	6.87197		7.45472	7.36341	7.62141
6.76804	4.38477	4.14348	4.02409		3.94767	3.90298	3.90298		3.86105	3.82079	3.82079		3.84264	3.84264	3.81474		3.9822	3.98363	3.99489		4.46077	4.43832	4.35078		4.85909	4.88919	4.89839		5.76978	5.6153	5.6922		6.76723	6.88426	6.88426		7.46074	7.36862	7.62476
6.77524	4.38535	4.14379	4.02464		3.94834	3.9046	3.9046		3.86089	3.82122	3.82122		3.84486	3.84486	3.81572		3.98663	3.98704	3.99912		4.46938	4.44729	4.35815		4.87078	4.90206	4.91083		5.78507	5.62966	5.70508		6.7822	6.89683	6.89683		7.46647	7.37404	7.62796
6.78244	4.38638	4.14401	4.02512		3.94904	3.90606	3.90606		3.8606	3.82174	3.82174		3.84694	3.84694	3.81686		3.99126	3.99047	4.00341		4.47814	4.45668	4.36555		4.88287	4.91505	4.92344		5.8005	5.64431	5.7181		6.79713	6.90981	6.90981		7.47196	7.37954	7.63107
6.78964	4.38786	4.1442	4.02557		3.94966	3.90737	3.90737		3.86033	3.82233	3.82233		3.84888	3.84888	3.81825		3.99616	3.99406	4.00781		4.48701	4.46644	4.37291		4.89528	4.92805	4.93629		5.81597	5.65917	5.73134		6.8119	6.92328	6.92328		7.47731	7.38502	7.63417
6.79684	4.38966	4.14443	4.02601		3.9501	3.90854	3.90854		3.86021	3.82293	3.82293		3.85069	3.85069	3.8199		4.00138	3.99797	4.01237		4.49592	4.4765	4.38023		4.90794	4.94096	4.94946		5.83144	5.6742	5.74492		6.82644	6.93729	6.93729		7.48266	7.39052	7.63741
6.80404	4.3916	4.14484	4.02648		3.95027	3.90958	3.90958		3.86035	3.82351	3.82351		3.85235	3.85235	3.82181		4.00687	4.00235	4.01709		4.50482	4.48683	4.38746		4.92081	4.95372	4.96299		5.8469	5.68928	5.75885		6.84069	6.95181	6.95181		7.48812	7.39613	7.64095
6.81124	4.39352	4.1455	4.02703		3.9502	3.91048	3.91048		3.86081	3.82401	3.82401		3.85386	3.85386	3.82394		4.01253	4.00726	4.0219		4.51369	4.49736	4.39463		4.93384	4.96634	4.97687		5.86233	5.7044	5.77319		6.8546	6.96675	6.96675		7.49381	7.40187	7.64505
6.81844	4.39525	4.14652	4.02774		3.94999	3.9112	3.9112		3.86164	3.82443	3.82443		3.85523	3.85523	3.82625		4.01819	4.01271	4.0267		4.52255	4.50799	4.40179		4.94695	4.97881	4.99099		5.87775	5.71949	5.78792		6.86811	6.98201	6.98201		7.4998	7.40772	7.64989
6.82564	4.39669	4.14792	4.02871		3.9498	3.91175	3.91175		3.86282	3.82483	3.82483		3.85648	3.85648	3.82872		4.02372	4.01861	4.03141		4.53145	4.51857	4.40905		4.96002	4.99116	5.00522		5.89318	5.73453	5.80297		6.88123	6.99747	6.99747		7.50612	7.41369	7.65558
6.83284	4.39782	4.14968	4.02997		3.94981	3.91217	3.91217		3.86435	3.82526	3.82526		3.85771	3.85771	3.8313		4.029	4.02476	4.036		4.54047	4.52899	4.41652		4.97297	5.00344	5.01943		5.90869	5.74948	5.81829		6.89406	7.01305	7.01305		7.51268	7.41978	7.66206
6.84004	4.39866	4.15175	4.0315		3.95012	3.91251	3.91251		3.86621	3.82577	3.82577		3.859	3.859	3.834		4.03396	4.03092	4.04052		4.54968	4.53922	4.42432		4.9857	5.01575	5.03354		5.9244	5.76438	5.83379		6.9068	7.02866	7.02866		7.51939	7.42603	7.66919
6.84724	4.39929	4.15404	4.03322		3.95081	3.91276	3.91276		3.86831	3.82642	3.82642		3.86038	3.86038	3.83677		4.03857	4.0369	4.04508		4.55912	4.54924	4.43252		4.99817	5.02825	5.04749		5.9404	5.77927	5.8494		6.91968	7.0443	7.0443		7.52613	7.43247	7.67681
6.85444	4.39984	4.15643	4.03504		3.95189	3.9129	3.9129		3.87056	3.82726	3.82726		3.86197	3.86197	3.83958		4.04288	4.04261	4.04981		4.56879	4.55911	4.44116		5.01039	5.04102	5.06126		5.95674	5.79416	5.8651		6.93296	7.05998	7.05998		7.53285	7.43905	7.68476
6.86164	4.40043	4.15877	4.03683		3.95333	3.91294	3.91294		3.87285	3.82833	3.82833		3.86382	3.86382	3.84231		4.04699	4.04812	4.05483		4.57868	4.56881	4.4502		5.02245	5.05406	5.07487		5.97338	5.80903	5.88087		6.94683	7.07577	7.07577		7.53955	7.44576	7.69289
6.86884	4.40118	4.16091	4.0385		3.95508	3.91297	3.91297		3.87507	3.82966	3.82966		3.866	3.866	3.84489		4.05108	4.05349	4.06026		4.5888	4.57843	4.45958		5.03446	5.06729	5.08845		5.99027	5.82393	5.89668		6.96145	7.0917	7.0917		7.54631	7.45259	7.70108
6.87604	4.40213	4.1627	4.03994		3.95703	3.91315	3.91315		3.87709	3.83123	3.83123		3.86853	3.86853	3.84725		4.05536	4.05883	4.06613		4.59909	4.58809	4.46917		5.04663	5.0806	5.10214		6.00736	5.83889	5.91244		6.97685	7.10781	7.10781		7.55326	7.45958	7.70916
6.88324	4.40325	4.16403	4.0411		3.9591	3.91357	3.91357		3.87882	3.833	3.833		3.87135	3.87135	3.84935		4.05996	4.06422	4.0724		4.60948	4.59793	4.47887		5.05916	5.09394	5.11609		6.0246	5.85399	5.92805		6.993	7.12406	7.12406		7.56052	7.46678	7.71708
6.89044	4.40452	4.16487	4.04198		3.96119	3.9143	3.9143		3.88018	3.8349	3.8349		3.87435	3.87435	3.85121		4.06497	4.0698	4.07894		4.61991	4.60802	4.48853		5.07218	5.10728	5.13032		6.0419	5.86923	5.94344		7.00973	7.1404	7.1404		7.56821	7.4742	7.72486
6.89764	4.40587	4.16527	4.04269		3.9633	3.9153	3.9153		3.88114	3.83689	3.83689		3.87744	3.87744	3.8529		4.07031	4.07566	4.08558		4.6303	4.61836	4.49812		5.0858	5.12061	5.14479		6.05921	5.88461	5.95862		7.02686	7.1568	7.1568		7.57642	7.48184	7.73258
6.90484	4.4073	4.1653	4.0433		3.96541	3.91654	3.91654		3.88173	3.8389	3.8389		3.88055	3.88055	3.85457		4.07589	4.08183	4.0921		4.64061	4.62884	4.50763		5.09996	5.13395	5.15941		6.07642	5.90011	5.97363		7.04416	7.17323	7.17323		7.58517	7.48965	7.74032
6.91204	4.40875	4.16512	4.04391		3.96747	3.91796	3.91796		3.88204	3.84087	3.84087		3.88363	3.88363	3.85637		4.08159	4.0882	4.09834		4.65084	4.63935	4.51709		5.11459	5.14739	5.1741		6.09347	5.91579	5.98851		7.06146	7.1897	7.1897		7.59442	7.49762	7.74814
6.91924	4.4102	4.16493	4.04453		3.96939	3.91942	3.91942		3.8822	3.84272	3.84272		3.88665	3.88665	3.85844		4.08731	4.09461	4.10416		4.66102	4.64981	4.52654		5.12953	5.16102	5.1888		6.11028	5.93171	6.00334		7.07868	7.20623	7.20623		7.60408	7.5057	7.75607
6.92644	4.41163	4.16492	4.04517		3.97109	3.92081	3.92081		3.88241	3.8444	3.8444		3.88959	3.88959	3.86084		4.09289	4.10089	4.10953		4.67123	4.66017	4.53606		5.14462	5.17498	5.20344		6.12687	5.94788	6.01823		7.09579	7.22285	7.22285		7.61397	7.51386	7.76412
6.93364	4.41301	4.16526	4.04583		3.97251	3.92198	3.92198		3.88288	3.8459	3.8459		3.89251	3.89251	3.86357		4.09827	4.10697	4.1145		4.68156	4.67043	4.54574		5.15966	5.18935	5.21798		6.14327	5.9643	6.0333		7.11283	7.23959	7.23959		7.62389	7.52211	7.77228
6.94084	4.4143	4.16603	4.04649		3.97362	3.92286	3.92286		3.88376	3.84721	3.84721		3.89544	3.89544	3.86649		4.10341	4.11284	4.11918		4.69214	4.6806	4.55566		5.17449	5.20414	5.23244		6.15956	5.9809	6.04862		7.12982	7.25656	7.25656		7.63363	7.53047	7.78055
6.94804	4.41546	4.16723	4.04708		3.9744	3.92346	3.92346		3.88511	3.84835	3.84835		3.89847	3.89847	3.86947		4.10843	4.11848	4.12377		4.70302	4.69077	4.56591		5.18906	5.21928	5.2469		6.17586	5.99768	6.06425		7.14675	7.27378	7.27378		7.64306	7.53898	7.78887
6.95524	4.41645	4.1688	4.04756		3.97487	3.9239	3.9239		3.88689	3.84936	3.84936		3.90156	3.90156	3.87232		4.11349	4.12389	4.12847		4.71421	4.7011	4.5765		5.20341	5.23471	5.26147		6.19224	6.01462	6.08011		7.16358	7.29126	7.29126		7.65217	7.54769	7.79722
6.96244	4.41729	4.17056	4.04791		3.97503	3.92431	3.92431		3.88903	3.85029	3.85029		3.90468	3.90468	3.87493		4.11875	4.12909	4.13346		4.72573	4.71174	4.58737		5.21762	5.25036	5.27625		6.20884	6.03166	6.09618		7.18027	7.30898	7.30898		7.661	7.55666	7.80553
6.96964	4.41798	4.17237	4.0482		3.97494	3.9248	3.9248		3.89135	3.85115	3.85115		3.9078	3.9078	3.8772		4.12433	4.13414	4.13887		4.73747	4.72282	4.59847		5.23179	5.26616	5.29128		6.22572	6.04876	6.11237		7.19678	7.32682	7.32682		7.66965	7.56597	7.8138
6.97684	4.41856	4.17412	4.04859		3.97471	3.92548	3.92548		3.89371	3.85196	3.85196		3.91088	3.91088	3.87917		4.13032	4.13911	4.14473		4.74932	4.73436	4.60974		5.24599	5.28206	5.30656		6.24297	6.0658	6.12867		7.21308	7.34469	7.34469		7.67826	7.57561	7.82204
6.98404	4.41909	4.17573	4.04919		3.97452	3.9264	3.9264		3.89591	3.85273	3.85273		3.9139	3.9139	3.88094		4.13674	4.14415	4.15102		4.7611	4.74634	4.62112		5.26032	5.29801	5.32205		6.26059	6.08274	6.14507		7.22924	7.36248	7.36248		7.68695	7.58556	7.8303
6.99124	4.41961	4.17719	4.05009		3.97452	3.92761	3.92761		3.8978	3.85351	3.85351		3.91682	3.91682	3.88265		4.14358	4.14934	4.15764		4.77266	4.75865	4.63256		5.2749	5.31399	5.33766		6.27857	6.09956	6.16153		7.2454	7.3801	7.3801		7.69589	7.59568	7.83863
6.99844	4.42016	4.17853	4.05134		3.97491	3.92913	3.92913		3.89929	3.85436	3.85436		3.91966	3.91966	3.88445		4.15078	4.15475	4.16449		4.78392	4.77119	4.64396		5.28984	5.32998	5.35327		6.29684	6.11631	6.1781		7.26174	7.39748	7.39748		7.70514	7.60587	7.84704
7.00564	4.42078	4.17978	4.05294		3.97581	3.93094	3.93094		3.90038	3.85532	3.85532		3.92244	3.92244	3.88646		4.15823	4.16042	4.17145		4.7949	4.78386	4.65531		5.30512	5.34601	5.36874		6.31539	6.13302	6.19479		7.2784	7.41457	7.41457		7.71474	7.61604	7.85556
7.01284	4.42147	4.18097	4.05483		3.97732	3.93301	3.93301		3.90114	3.85644	3.85644		3.92526	3.92526	3.88876		4.16579	4.16636	4.17843		4.80568	4.79658	4.66662		5.32075	5.36212	5.38399		6.33417	6.14972	6.21162		7.29554	7.4314	7.4314		7.72464	7.6261	7.86421
7.02004	4.42221	4.18214	4.05693		3.97948	3.93534	3.93534		3.90171	3.85771	3.85771		3.92822	3.92822	3.89136		4.17336	4.17264	4.18537		4.81642	4.80928	4.67795		5.33668	5.37835	5.399		6.35322	6.16644	6.2286		7.31322	7.44805	7.44805		7.73474	7.63598	7.873
7.02724	4.42293	4.18327	4.05908		3.98225	3.93791	3.93791		3.90223	3.85917	3.85917		3.93137	3.93137	3.89426		4.1809	4.17925	4.19224		4.82727	4.82195	4.68934		5.35291	5.39474	5.41382		6.37255	6.18318	6.24574		7.33146	7.46471	7.46471		7.74495	7.64564	7.88196
7.03445	4.42356	4.18441	4.06108		3.98548	3.94072	3.94072		3.90282	3.86084	3.86084		3.93473	3.93473	3.89737		4.18836	4.18613	4.19908		4.83841	4.8346	4.70082		5.3695	5.41128	5.42855		6.3922	6.19993	6.26307		7.35014	7.48157	7.48157		7.7552	7.65513	7.89119
7.04165	4.42412	4.1855	4.06284		3.98899	3.94371	3.94371		3.90354	3.86266	3.86266		3.93831	3.93831	3.90061		4.19574	4.19313	4.20591		4.84999	4.84728	4.71238		5.38642	5.42798	5.44338		6.41221	6.21673	6.28062		7.36907	7.49879	7.49879		7.76548	7.66457	7.90085
7.04885	4.42463	4.18648	4.06424		3.99249	3.94676	3.94676		3.90447	3.86459	3.86459		3.94205	3.94205	3.90394		4.20304	4.20012	4.21274		4.8621	4.86004	4.724		5.4036	5.44483	5.45852		6.43256	6.2336	6.29843		7.38804	7.5165	7.5165		7.77581	7.67409	7.91105
7.05605	4.42521	4.18735	4.06532		3.99574	3.94977	3.94977		3.90567	3.86654	3.86654		3.94593	3.94593	3.90731		4.21028	4.20696	4.21954		4.87474	4.87295	4.73566		5.42098	5.46184	5.4742		6.45313	6.25056	6.31656		7.4069	7.53478	7.53478		7.7862	7.68383	7.92187
7.06325	4.42591	4.18815	4.0661		3.99856	3.95256	3.95256		3.90714	3.86844	3.86844		3.94989	3.94989	3.91072		4.21752	4.21361	4.22632		4.88787	4.88602	4.7473		5.43857	5.479	5.49059		6.47377	6.26764	6.33505		7.42561	7.55366	7.55366		7.7967	7.69379	7.9333
7.07045	4.42676	4.18897	4.06665		4.00085	3.95501	3.95501		3.90893	3.87022	3.87022		3.95388	3.95388	3.91419		4.22481	4.22006	4.23303		4.90144	4.89925	4.75885		5.45638	5.49622	5.50776		6.49434	6.28487	6.35393		7.44416	7.57307	7.57307		7.80731	7.70398	7.94526
7.07765	4.42772	4.18987	4.06707		4.00259	3.95703	3.95703		3.91096	3.87192	3.87192		3.95787	3.95787	3.91774		4.23216	4.22639	4.23967		4.91539	4.91264	4.77032		5.47444	5.51348	5.52569		6.51473	6.30237	6.37318		7.46258	7.59279	7.59279		7.81801	7.71435	7.95765
7.08485	4.42878	4.19085	4.06747		4.00382	3.95861	3.95861		3.91319	3.87351	3.87351		3.96185	3.96185	3.92138		4.23958	4.23269	4.24625		4.92966	4.92622	4.78172		5.49271	5.53073	5.54424		6.53485	6.32022	6.39269		7.48093	7.61257	7.61257		7.82876	7.72488	7.97024
7.09205	4.42995	4.19188	4.06799		4.00463	3.95979	3.95979		3.91561	3.87502	3.87502		3.96581	3.96581	3.92519		4.2471	4.23913	4.25278		4.94412	4.94001	4.79313		5.51108	5.54802	5.56321		6.55465	6.33852	6.41229		7.49929	7.6322	7.6322		7.83952	7.73553	7.98275
7.09925	4.4312	4.19297	4.06871		4.00512	3.96069	3.96069		3.91822	3.87651	3.87651		3.96973	3.96973	3.92918		4.25473	4.24592	4.25932		4.95868	4.95397	4.80457		5.52947	5.56543	5.58234		6.57414	6.35726	6.43176		7.51777	7.65154	7.65154		7.8502	7.74626	7.99485
7.10645	4.43253	4.19413	4.06972		4.00545	3.96147	3.96147		3.92096	3.87806	3.87806		3.9736	3.9736	3.93334		4.26247	4.25323	4.26592		4.97321	4.96807	4.81607		5.5478	5.58299	5.60142		6.59344	6.37637	6.45097		7.53644	7.67059	7.67059		7.86075	7.75701	8.00633
7.11365	4.4339	4.19545	4.07103		4.00575	3.96227	3.96227		3.92377	3.87976	3.87976		3.97746	3.97746	3.93761		4.27031	4.26114	4.27265		4.98765	4.98224	4.82765		5.56601	5.60074	5.62028		6.61278	6.39574	6.46977		7.55527	7.68937	7.68937		7.87113	7.76772	8.01709
7.12085	4.43529	4.19691	4.07261		4.00611	3.96316	3.96316		3.92654	3.88169	3.88169		3.98132	3.98132	3.94191		4.27824	4.26964	4.27957		5.00194	4.99644	4.83937		5.58404	5.61869	5.63886		6.6324	6.4153	6.48811		7.57419	7.70794	7.70794		7.88137	7.7784	8.0272
7.12805	4.43675	4.19849	4.07442		4.00658	3.96417	3.96417		3.92914	3.8839	3.8839		3.98519	3.98519	3.94611		4.28627	4.27862	4.28677		5.01606	5.01059	4.85125		5.60182	5.63685	5.65716		6.65248	6.43495	6.50595		7.59309	7.72646	7.72646		7.89158	7.78905	8.03676
7.13525	4.43831	4.2002	4.07634		4.0072	3.96527	3.96527		3.93146	3.88644	3.88644		3.98905	3.98905	3.95012		4.29444	4.28795	4.29434		5.03004	5.02467	4.86336		5.61932	5.65522	5.67529		6.67309	6.45456	6.52338		7.61186	7.74513	7.74513		7.90192	7.79966	8.04594
7.14245	4.44001	4.20207	4.07826		4.00801	3.96641	3.96641		3.93345	3.88932	3.88932		3.9929	3.9929	3.95384		4.30277	4.29741	4.30238		5.04391	5.03861	4.87568		5.63666	5.6738	5.69336		6.69423	6.47401	6.54056		7.63047	7.76413	7.76413		7.91252	7.8102	8.05489
7.14965	4.4418	4.2041	4.08009		4.00906	3.96751	3.96751		3.93507	3.89251	3.89251		3.99676	3.99676	3.95718		4.3113	4.30682	4.31089		5.05773	5.05242	4.88831		5.65396	5.69253	5.71151		6.71583	6.49322	6.55777		7.64891	7.78351	7.78351		7.92347	7.82062	8.06385
7.15685	4.4436	4.20626	4.08179		4.0104	3.9685	3.9685		3.93628	3.89593	3.89593		4.00065	4.00065	3.96011		4.31999	4.316	4.31982		5.07166	5.06614	4.90131		5.67138	5.71136	5.72987		6.73777	6.51219	6.57531		7.66718	7.80318	7.80318		7.93478	7.83088	8.07304
7.16405	4.44532	4.20842	4.08335		4.01204	3.96936	3.96936		3.93712	3.89947	3.89947		4.00456	4.00456	3.9627		4.32881	4.32486	4.32906		5.08582	5.07989	4.91475		5.68898	5.73024	5.74847		6.75989	6.53097	6.59342		7.68531	7.823	7.823		7.94639	7.84101	8.08266
7.17125	4.44689	4.21047	4.08481		4.01394	3.97014	3.97014		3.93769	3.903	3.903		4.00842	4.00842	3.96506		4.3377	4.33341	4.33847		5.10029	5.09381	4.92861		5.7068	5.74914	5.76733		6.78194	6.54965	6.61227		7.70332	7.84277	7.84277		7.95819	7.85105	8.09276
7.17845	4.44832	4.21232	4.08625		4.01611	3.97093	3.97093		3.9381	3.90642	3.90642		4.01216	4.01216	3.96738		4.34662	4.34175	4.34791		5.11508	5.10803	4.94283		5.72489	5.76809	5.78637		6.80372	6.56832	6.63189		7.72129	7.86241	7.86241		7.97003	7.86107	8.10331
7.18565	4.4497	4.21392	4.08778		4.01849	3.97187	3.97187		3.93856	3.90963	3.90963		4.01577	4.01577	3.96981		4.35553	4.35002	4.35721		5.13015	5.1227	4.95728		5.74323	5.78714	5.80552		6.82508	6.58713	6.65226		7.73934	7.88184	7.88184		7.98177	7.87112	8.11426
7.19285	4.45108	4.21526	4.08947		4.02107	3.97311	3.97311		3.93922	3.91256	3.91256		4.01924	4.01924	3.97251		4.36441	4.35839	4.36619		5.14544	5.13787	4.97184		5.76181	5.80634	5.8247		6.84606	6.60627	6.67331		7.75757	7.90102	7.90102		7.99332	7.88124	8.12556
7.20005	4.45256	4.21635	4.09139		4.02376	3.97475	3.97475		3.94018	3.9152	3.9152		4.02263	4.02263	3.97553		4.37323	4.36695	4.37473		5.16095	5.15355	4.98642		5.78057	5.82574	5.84392		6.86677	6.62591	6.69488		7.77607	7.91997	7.91997		8.00464	7.89144	8.13714
7.20725	4.45421	4.21721	4.09353		4.02649	3.97679	3.97679		3.94151	3.91756	3.91756		4.02595	4.02595	3.97892		4.38197	4.37577	4.38284		5.17669	5.16974	5.0009		5.79945	5.84534	5.8632		6.88735	6.64617	6.71675		7.79489	7.93878	7.93878		8.01582	7.90175	8.14888
7.21445	4.45609	4.21796	4.09586		4.02918	3.97921	3.97921		3.94329	3.91973	3.91973		4.02923	4.02923	3.98269		4.39061	4.3849	4.39066		5.19263	5.18629	5.01519		5.81843	5.86512	5.88255		6.90794	6.66704	6.73867		7.81407	7.9576	7.9576		8.02697	7.91222	8.16063
7.22165	4.45824	4.21875	4.0983		4.03177	3.98189	3.98189		3.94553	3.92177	3.92177		4.03254	4.03254	3.98681		4.39917	4.39429	4.39847		5.20873	5.20305	5.02924		5.83758	5.88508	5.90203		6.92867	6.68847	6.76044		7.83367	7.97657	7.97657		8.03823	7.92289	8.17229
7.22885	4.46064	4.21973	4.10072		4.03422	3.98471	3.98471		3.94823	3.92381	3.92381		4.03597	4.03597	3.99118		4.40772	4.40387	4.40649		5.22495	5.21979	5.0431		5.85697	5.90519	5.92167		6.94969	6.71034	6.782		7.85379	7.99583	7.99583		8.04968	7.93381	8.18385
7.23605	4.46323	4.22104	4.10303		4.0365	3.98753	3.98753		3.95133	3.92592	3.92592		4.03962	4.03962	3.9957		4.41628	4.41354	4.41494		5.24128	5.23635	5.05683		5.87667	5.92548	5.94154		6.97115	6.73248	6.80339		7.87445	8.01545	8.01545		8.06137	7.94501	8.19534
7.24325	4.46584	4.2227	4.10517		4.03855	3.99022	3.99022		3.95474	3.92816	3.92816		4.04357	4.04357	4.00032		4.42488	4.42322	4.42395		5.25777	5.25262	5.07054		5.89669	5.94593	5.96167		6.9931	6.75463	6.82471		7.89561	8.03549	8.03549		8.07322	7.95648	8.20681
7.25045	4.46835	4.22471	4.10711		4.0404	3.99272	3.99272		3.95834	3.93054	3.93054		4.04786	4.04786	4.00508		4.43349	4.43288	4.43361		5.27443	5.26858	5.08429		5.91702	5.96653	5.98207		7.0155	6.77654	6.84602		7.9171	8.05603	8.05603		8.08511	7.96821	8.21831
7.25765	4.47066	4.22702	4.10891		4.04207	3.99501	3.99501		3.962	3.93303	3.93303		4.05251	4.05251	4.01003		4.44212	4.44252	4.44393		5.29127	5.28429	5.09815		5.93766	5.9873	6.00266		7.03818	6.79799	6.86737		7.93874	8.0771	8.0771		8.09688	7.98015	8.22985
7.26485	4.47277	4.22955	4.11062		4.04363	3.99714	3.99714		3.96565	3.93557	3.93557		4.05755	4.05755	4.01521		4.45082	4.45213	4.45479		5.30819	5.29987	5.11218		5.95855	6.00827	6.02342		7.061	6.81893	6.88873		7.96039	8.0987	8.0987		8.10835	7.99226	8.24143
7.27205	4.47472	4.23216	4.11233		4.04519	3.9992	3.9992		3.96918	3.93808	3.93808		4.06296	4.06296	4.02058		4.45966	4.46173	4.46597		5.32514	5.31546	5.12644		5.9796	6.02953	6.04431		7.08383	6.83941	6.9101		7.98194	8.12082	8.12082		8.11942	8.00443	8.25305
7.27925	4.47659	4.23471	4.11413		4.04682	4.00127	4.00127		3.97257	3.9405	3.9405		4.06868	4.06868	4.0261		4.46866	4.47133	4.47725		5.34211	5.33122	5.14099		6.00078	6.05109	6.06534		7.10658	6.85957	6.93144		8.00328	8.14335	8.14335		8.13009	8.01654	8.26465
7.28645	4.47839	4.23704	4.11612		4.04862	4.0034	4.0034		3.9758	3.94275	3.94275		4.07467	4.07467	4.03175		4.47783	4.48096	4.4884		5.35909	5.34731	5.15583		6.02198	6.07294	6.08652		7.12919	6.8796	6.95263		8.02427	8.16613	8.16613		8.14048	8.02851	8.27618
7.29365	4.48019	4.23904	4.11838		4.05071	4.00559	4.00559		3.97889	3.94479	3.94479		4.0808	4.0808	4.03749		4.48719	4.49069	4.49927		5.37606	5.36384	5.17093		6.04315	6.09493	6.10784		7.15161	6.89968	6.97353		8.04481	8.18891	8.18891		8.15077	8.04032	8.2876
7.30085	4.48201	4.24071	4.12093		4.05315	4.00782	4.00782		3.98192	3.94664	3.94664		4.08695	4.08695	4.04322		4.49677	4.50056	4.50984		5.39295	5.3809	5.18623		6.06422	6.11692	6.12928		7.17384	6.91994	6.99407		8.0649	8.21132	8.21132		8.16111	8.05202	8.29896
7.30805	4.48395	4.24214	4.12374		4.05598	4.01005	4.01005		3.98493	3.9484	3.9484		4.09304	4.09304	4.04885		4.50665	4.51059	4.52011		5.40968	5.39848	5.2017		6.08513	6.13878	6.15085		7.19597	6.94048	7.01426		8.08468	8.23299	8.23299		8.17163	8.0637	8.31028
7.31525	4.48605	4.24352	4.12676		4.05914	4.0123	4.0123		3.98799	3.95019	3.95019		4.09902	4.09902	4.05431		4.51686	4.52081	4.53014		5.42621	5.41652	5.21734		6.1058	6.16045	6.17257		7.21818	6.96132	7.03419		8.10432	8.25365	8.25365		8.18242	8.07545	8.32159
7.32245	4.4883	4.24505	4.12992		4.06253	4.01461	4.01461		3.99111	3.95214	3.95214		4.10491	4.10491	4.05959		4.52744	4.53122	4.5401		5.44258	5.4349	5.23319		6.12621	6.18182	6.1945		7.24058	6.98245	7.05405		8.12392	8.27317	8.27317		8.19352	8.08733	8.33289
7.32965	4.49069	4.24693	4.13319		4.06603	4.01702	4.01702		3.99422	3.95437	3.95437		4.11078	4.11078	4.06477		4.53836	4.54175	4.55011		5.45885	5.45349	5.24927		6.14641	6.20285	6.21663		7.26328	7.00379	7.07402		8.1435	8.29163	8.29163		8.20493	8.09931	8.34421
7.33685	4.49324	4.2493	4.13653		4.06946	4.0196	4.0196		3.99723	3.95698	3.95698		4.11673	4.11673	4.06997		4.54959	4.55238	4.56029		5.47512	5.47217	5.26557		6.16645	6.22352	6.23901		7.28632	7.02525	7.09425		8.16314	8.30922	8.30922		8.21656	8.11138	8.35558
7.34405	4.49595	4.2523	4.13988		4.07273	4.02236	4.02236		4.00006	3.96	3.96		4.12281	4.12281	4.07526		4.56113	4.563	4.57075		5.49145	5.49082	5.28213		6.18644	6.24393	6.26168		7.3097	7.04675	7.1149		8.18288	8.32629	8.32629		8.22833	8.12344	8.36695
7.35125	4.49884	4.25596	4.14318		4.07574	4.0253	4.0253		4.00263	3.9634	3.9634		4.12907	4.12907	4.08073		4.57289	4.57352	4.58147		5.5079	5.50938	5.29899		6.20655	6.26425	6.28469		7.33343	7.06831	7.13608		8.20285	8.34324	8.34324		8.24021	8.13535	8.37823
7.35845	4.50188	4.26014	4.14641		4.07847	4.0284	4.0284		4.00493	3.96708	3.96708		4.13554	4.13554	4.08641		4.58484	4.58384	4.59244		5.52454	5.52778	5.3162		6.2269	6.28465	6.30806		7.35747	7.08997	7.15784		8.22307	8.36056	8.36056		8.25226	8.147	8.38923
7.36565	4.50497	4.26463	4.14953		4.08099	4.03162	4.03162		4.00698	3.97086	3.97086		4.14214	4.14214	4.09232		4.59689	4.59394	4.60358		5.54141	5.54602	5.33374		6.24768	6.30531	6.33175		7.38172	7.11182	7.18013		8.24346	8.37862	8.37862		8.26456	8.15826	8.39986
7.37285	4.50804	4.26913	4.15251		4.08341	4.03485	4.03485		4.00885	3.97453	3.97453		4.14878	4.14878	4.0984		4.60899	4.60384	4.61482		5.55851	5.56412	5.35153		6.26902	6.32637	6.35564		7.40603	7.13388	7.20286		8.26388	8.39767	8.39767		8.27718	8.16914	8.41013
7.38005	4.51099	4.27333	4.15528		4.08587	4.03796	4.03796		4.0107	3.97794	3.97794		4.1553	4.1553	4.10457		4.62106	4.61364	4.6261		5.57583	5.58212	5.36939		6.29103	6.34789	6.37963		7.43027	7.15615	7.22591		8.28424	8.41777	8.41777		8.29008	8.17974	8.42015
7.38725	4.51382	4.27701	4.15778		4.08853	4.04085	4.04085		4.0127	3.98097	3.98097		4.16158	4.16158	4.11072		4.63302	4.6235	4.63735		5.59334	5.6001	5.38718		6.31369	6.36997	6.40357		7.45427	7.17853	7.24919		8.30449	8.43877	8.43877		8.3032	8.19023	8.43005
7.39445	4.51652	4.28005	4.15995		4.0915	4.04351	4.04351		4.01506	3.98355	3.98355		4.16759	4.16759	4.11677		4.64491	4.63356	4.64864		5.61107	5.61811	5.40476		6.33692	6.39268	6.42731		7.47789	7.20102	7.27261		8.32465	8.46042	8.46042		8.31639	8.20078	8.43996
7.40165	4.51912	4.28242	4.16184		4.09482	4.04601	4.04601		4.01789	3.98571	3.98571		4.17336	4.17336	4.1227		4.65674	4.64402	4.66005		5.62907	5.63619	5.4221		6.36057	6.41605	6.45073		7.50101	7.22363	7.29609		8.34468	8.48243	8.48243		8.32952	8.21151	8.45001
7.40885	4.52164	4.28423	4.16352		4.09843	4.04847	4.04847		4.02122	3.98756	3.98756		4.179	4.179	4.12851		4.66859	4.655	4.67163		5.64743	5.65435	5.43917		6.38449	6.44001	6.47376		7.52355	7.24632	7.31953		8.36453	8.50458	8.50458		8.34242	8.22248	8.46041
7.41605	4.52415	4.28563	4.16507		4.10222	4.05101	4.05101		4.02498	3.98927	3.98927		4.18461	4.18461	4.13423		4.68053	4.66658	4.68347		5.66615	5.6726	5.45603		6.40857	6.46446	6.49642		7.54556	7.269	7.34288		8.3842	8.5267	8.5267		8.35485	8.23369	8.47126
7.42325	4.52678	4.28689	4.16659		4.10602	4.05373	4.05373		4.02905	3.99103	3.99103		4.19031	4.19031	4.13991		4.69255	4.67877	4.69557		5.68524	5.69096	5.47281		6.43267	6.48922	6.51883		7.56716	7.29155	7.36608		8.40378	8.54872	8.54872		8.36669	8.24507	8.48262
7.43045	4.52962	4.28824	4.16819		4.10967	4.0567	4.0567		4.03327	3.99306	3.99306		4.19623	4.19623	4.14562		4.70468	4.69149	4.70791		5.70466	5.70953	5.48968		6.45666	6.51409	6.54117		7.58856	7.31395	7.38908		8.42342	8.57058	8.57058		8.37786	8.25653	8.49436
7.43765	4.53277	4.28985	4.16998		4.11303	4.05996	4.05996		4.03749	3.99551	3.99551		4.20246	4.20246	4.1514		4.71692	4.70461	4.72044		5.72433	5.72836	5.50684		6.4804	6.53892	6.56363		7.60998	7.33626	7.41183		8.44322	8.59227	8.59227		8.38846	8.26792	8.50633
7.44485	4.53625	4.29184	4.17204		4.11603	4.06353	4.06353		4.04154	3.99852	3.99852		4.20897	4.20897	4.15725		4.72929	4.71803	4.73306		5.74419	5.74752	5.5244		6.50381	6.56354	6.58634		7.63162	7.35851	7.43425		8.46323	8.61381	8.61381		8.39867	8.27911	8.51836
7.45205	4.54004	4.29427	4.17438		4.11862	4.06732	4.06732		4.04534	4.00218	4.00218		4.21569	4.21569	4.16313		4.7418	4.73165	4.74562		5.76412	5.76703	5.54237		6.52683	6.58786	6.60946		7.65373	7.3807	7.45637		8.48342	8.63528	8.63528		8.40867	8.29004	8.5303
7.45925	4.54402	4.29712	4.17697		4.12086	4.07123	4.07123		4.04891	4.00651	4.00651		4.22248	4.22248	4.16902		4.75442	4.7454	4.75807		5.78406	5.78691	5.56062		6.5495	6.6118	6.63307		7.67645	7.40277	7.47821		8.50374	8.65671	8.65671		8.41864	8.30077	8.54205
7.46645	4.54811	4.30034	4.17973		4.12288	4.07513	4.07513		4.05232	4.01146	4.01146		4.22922	4.22922	4.17489		4.76713	4.75922	4.77037		5.804	5.80719	5.579		6.57187	6.63539	6.65722		7.69985	7.42468	7.49987		8.52419	8.67807	8.67807		8.42867	8.31142	8.55354
7.47365	4.5522	4.30387	4.18266		4.12487	4.0789	4.0789		4.05567	4.01692	4.01692		4.23583	4.23583	4.1808		4.77991	4.77306	4.78256		5.82395	5.82787	5.59734		6.59397	6.65875	6.68182		7.72384	7.44648	7.52143		8.54474	8.69926	8.69926		8.43886	8.32211	8.5648
7.48085	4.5562	4.30766	4.1858		4.127	4.08253	4.08253		4.05909	4.02272	4.02272		4.24223	4.24223	4.18679		4.79277	4.78694	4.79474		5.84398	5.84887	5.6155		6.61589	6.68204	6.70674		7.74834	7.46828	7.54293		8.56535	8.72021	8.72021		8.44923	8.33294	8.5759
7.48805	4.56002	4.31168	4.18923		4.1294	4.08599	4.08599		4.06268	4.02865	4.02865		4.24841	4.24841	4.19292		4.80573	4.80087	4.80703		5.8642	5.87015	5.63338		6.63775	6.70545	6.73183		7.77323	7.49018	7.56442		8.58591	8.74087	8.74087		8.45971	8.34394	8.58694
7.49525	4.56362	4.31597	4.19303		4.13215	4.08931	4.08931		4.06652	4.03452	4.03452		4.25439	4.25439	4.19929		4.8188	4.81489	4.81957		5.88467	5.89161	5.65096		6.65973	6.72914	6.75696		7.7985	7.51219	7.586		8.6063	8.76125	8.76125		8.4702	8.35513	8.598
7.50245	4.56702	4.32051	4.1972		4.13527	4.09254	4.09254		4.07064	4.04016	4.04016		4.26028	4.26028	4.20595		4.83199	4.82893	4.83247		5.90534	5.91323	5.66827		6.68206	6.75317	6.78204		7.82413	7.53434	7.60778		8.62649	8.78139	8.78139		8.48055	8.36655	8.6091
7.50965	4.57028	4.32525	4.2017		4.13874	4.09575	4.09575		4.075	4.04548	4.04548		4.26624	4.26624	4.21297		4.8453	4.84296	4.84579		5.92617	5.93498	5.68546		6.70485	6.77758	6.80701		7.85011	7.55659	7.62982		8.64643	8.80134	8.80134		8.49064	8.37823	8.62026
7.51685	4.5735	4.33012	4.20645		4.1425	4.09906	4.09906		4.07954	4.05048	4.05048		4.27248	4.27248	4.22037		4.85873	4.85693	4.85948		5.94705	5.95684	5.70275		6.72817	6.80236	6.83186		7.87638	7.57901	7.65214		8.66609	8.82114	8.82114		8.50039	8.39012	8.63146
7.52405	4.57677	4.335	4.21134		4.14644	4.10261	4.10261		4.0842	4.0552	4.0552		4.27912	4.27912	4.22811		4.87228	4.87079	4.87342		5.96787	5.97879	5.7203		6.75201	6.82744	6.85657		7.90283	7.60162	7.67477		8.68543	8.84083	8.84083		8.50978	8.4022	8.64269
7.53125	4.58007	4.33985	4.2162		4.15047	4.10652	4.10652		4.08891	4.05978	4.05978		4.28629	4.28629	4.23612		4.88601	4.88453	4.8875		5.98859	6.00083	5.73826		6.77633	6.85272	6.88123		7.92931	7.62446	7.69773		8.70445	8.86046	8.86046		8.51889	8.41441	8.65381
7.53845	4.58341	4.34456	4.22087		4.15453	4.11087	4.11087		4.09361	4.06438	4.06438		4.29404	4.29404	4.24433		4.89997	4.89812	4.90158		6.00921	6.02293	5.75662		6.80107	6.87803	6.90594		7.95564	7.64753	7.72111		8.72323	8.88006	8.88006		8.52777	8.42664	8.66469
7.54565	4.58668	4.34909	4.22517		4.15861	4.11575	4.11575		4.09824	4.06916	4.06916		4.30238	4.30238	4.25268		4.91427	4.91156	4.91557		6.02979	6.04501	5.77531		6.82615	6.90326	6.93086		7.98162	7.67083	7.74496		8.74196	8.89967	8.89967		8.53658	8.43874	8.6752
7.55285	4.58983	4.35339	4.22903		4.16269	4.12114	4.12114		4.10273	4.07421	4.07421		4.31129	4.31129	4.2611		4.92898	4.92486	4.92938		6.05044	6.067	5.79426		6.85145	6.92836	6.95608		8.00705	7.69438	7.76919		8.76084	8.91931	8.91931		8.5455	8.45052	8.6853
7.56005	4.59281	4.35747	4.23244		4.1668	4.127	4.127		4.10704	4.07959	4.07959		4.32065	4.32065	4.26955		4.94412	4.93813	4.94304		6.07136	6.08881	5.81341		6.87684	6.95337	6.98167		8.0318	7.71816	7.79368		8.78001	8.93899	8.93899		8.55472	8.46178	8.69502
7.56725	4.59557	4.36138	4.23554		4.17098	4.1332	4.1332		4.11117	4.08525	4.08525		4.33028	4.33028	4.27802		4.9597	4.95145	4.95663		6.09272	6.11041	5.83271		6.90228	6.97838	7.00763		8.05587	7.7422	7.81827		8.7996	8.95868	8.95868		8.5644	8.47236	8.70438
7.57445	4.59816	4.36519	4.23849		4.17532	4.13955	4.13955		4.11518	4.09108	4.09108		4.33999	4.33999	4.28651		4.97571	4.96495	4.97037		6.11469	6.13177	5.85214		6.92769	7.00351	7.03396		8.07942	7.76641	7.84284		8.81965	8.97838	8.97838		8.57465	8.48215	8.7134
7.58165	4.6006	4.36898	4.24148		4.17989	4.14581	4.14581		4.11914	4.09697	4.09697		4.34964	4.34964	4.29506		4.99204	4.97872	4.98444		6.13725	6.15285	5.87164		6.95305	7.02884	7.06058		8.10272	7.79069	7.86734		8.84013	8.99816	8.99816		8.58551	8.49115	8.7221
7.58885	4.60303	4.37278	4.24462		4.18474	4.15173	4.15173		4.12314	4.1028	4.1028		4.35911	4.35911	4.30368		5.00857	4.99285	4.999		6.16031	6.17365	5.8912		6.97836	7.05442	7.08737		8.12602	7.81487	7.89164		8.86092	9.01811	9.01811		8.59695	8.49946	8.73054
7.59605	4.60559	4.37657	4.24802		4.18982	4.15708	4.15708		4.12728	4.10852	4.10852		4.36834	4.36834	4.31239		5.02511	5.00739	5.01412		6.1837	6.19417	5.91087		7.00364	7.08022	7.11423		8.14949	7.83881	7.91565		8.88186	9.03836	9.03836		8.60887	8.50728	8.73881
7.60325	4.60842	4.38032	4.25171		4.19505	4.16172	4.16172		4.13167	4.11414	4.11414		4.3773	4.3773	4.32119		5.04147	5.02235	5.02981		6.20722	6.21449	5.93066		7.02898	7.10611	7.14099		8.1732	7.86242	7.93923		8.90275	9.05896	9.05896		8.62114	8.51484	8.74702
7.61045	4.61162	4.38396	4.25573		4.20037	4.16561	4.16561		4.13643	4.11965	4.11965		4.38601	4.38601	4.33008		5.05753	5.03772	5.04606		6.23069	6.23471	5.95063		7.05448	7.13191	7.16756		8.19716	7.88573	7.96233		8.92343	9.0799	9.0799		8.63359	8.52238	8.75528
7.61765	4.61522	4.38746	4.26002		4.2057	4.16883	4.16883		4.14159	4.12509	4.12509		4.39457	4.39457	4.33908		5.07323	5.05344	5.06274		6.25398	6.25498	5.97078		7.0802	7.15744	7.1939		8.22131	7.90879	7.98497		8.9438	9.10116	9.10116		8.64601	8.53007	8.76367
7.62485	4.61918	4.39078	4.26452		4.211	4.17159	4.17159		4.14712	4.13049	4.13049		4.40306	4.40306	4.34812		5.08862	5.06938	5.07966		6.27694	6.27544	5.99111		7.10615	7.18259	7.22004		8.2455	7.93172	8.00722		8.96385	9.12265	9.12265		8.6582	8.53803	8.77225
7.63205	4.62345	4.39393	4.26915		4.21615	4.17416	4.17416		4.1529	4.13588	4.13588		4.41157	4.41157	4.35719		5.10378	5.08549	5.09664		6.29957	6.29625	6.01155		7.1323	7.20732	7.24607		8.26958	7.9546	8.02915		8.98362	9.14425	9.14425		8.66997	8.54633	8.7811
7.63925	4.62801	4.39697	4.27388		4.22107	4.17682	4.17682		4.15878	4.14127	4.14127		4.42016	4.42016	4.36623		5.11878	5.10167	5.11348		6.32186	6.31761	6.03213		7.15864	7.23168	7.27207		8.29338	7.97755	8.05085		9.0032	9.1657	9.1657		8.68117	8.55499	8.79025
7.64645	4.63278	4.39999	4.27871		4.22571	4.17979	4.17979		4.16464	4.14667	4.14667		4.42888	4.42888	4.37523		5.1337	5.11791	5.13011		6.34392	6.33965	6.05292		7.18505	7.25577	7.29812		8.3169	8.0006	8.07238		9.02268	9.18669	9.18669		8.69173	8.56395	8.79969
7.65365	4.63772	4.40309	4.28367		4.23011	4.18326	4.18326		4.17036	4.15201	4.15201		4.43782	4.43782	4.38417		5.14864	5.1342	5.14645		6.36588	6.36243	6.07398		7.21143	7.27983	7.32424		8.34023	8.02383	8.09385		9.04214	9.20697	9.20697		8.70171	8.57318	8.80938
7.66085	4.6428	4.40636	4.28874		4.23431	4.18727	4.18727		4.17588	4.1572	4.1572		4.44704	4.44704	4.39305		5.16362	5.15053	5.16248		6.38783	6.38592	6.09536		7.23765	7.30411	7.35049		8.36358	8.04725	8.11539		9.06168	9.22644	9.22644		8.71119	8.58261	8.81924
7.66805	4.64797	4.40986	4.29386		4.23842	4.19176	4.19176		4.18121	4.16227	4.16227		4.45657	4.45657	4.40188		5.17864	5.167	5.17817		6.40988	6.40997	6.11704		7.26358	7.32888	7.37687		8.38709	8.07084	8.13715		9.08129	9.24516	9.24516		8.72037	8.59215	8.82916
7.67525	4.65319	4.41359	4.29901		4.24249	4.19662	4.19662		4.1864	4.16724	4.16724		4.46645	4.46645	4.41067		5.19361	5.18368	5.19353		6.4321	6.43438	6.13894		7.28923	7.35428	7.40339		8.41089	8.09454	8.15921		9.10103	9.26329	9.26329		8.72941	8.60167	8.83906
7.68245	4.6584	4.41753	4.30416		4.24656	4.20174	4.20174		4.1915	4.17222	4.17222		4.4767	4.4767	4.41945		5.20852	5.20064	5.20863		6.45455	6.45892	6.16103		7.31465	7.38037	7.42998		8.43511	8.11833	8.18155		9.1209	9.28109	9.28109		8.73848	8.61096	8.84886
7.68965	4.66353	4.42162	4.3093		4.25073	4.20701	4.20701		4.19659	4.17726	4.17726		4.48734	4.48734	4.42827		5.22339	5.21789	5.22356		6.47724	6.48339	6.18328		7.34001	7.40714	7.45658		8.45981	8.14214	8.20413		9.14091	9.29884	9.29884		8.74773	8.61985	8.85852
7.69685	4.66855	4.42579	4.31445		4.25508	4.2124	4.2124		4.20175	4.18243	4.18243		4.49833	4.49833	4.43714		5.23832	5.23533	5.23844		6.50019	6.50764	6.20564		7.36547	7.43455	7.48318		8.485	8.16594	8.22689		9.16106	9.31678	9.31678		8.75723	8.6282	8.86808
7.70405	4.6734	4.43001	4.31962		4.25971	4.21791	4.21791		4.20702	4.18782	4.18782		4.50958	4.50958	4.4461		5.25349	5.25287	5.2534		6.52336	6.53158	6.22798		7.39118	7.4625	7.50983		8.51052	8.18967	8.24981		9.18129	9.33515	9.33515		8.76701	8.63598	8.87764
7.71125	4.67806	4.4343	4.32487		4.26464	4.22361	4.22361		4.21245	4.19351	4.19351		4.52095	4.52095	4.45517		5.26905	5.27042	5.26857		6.54669	6.55527	6.25017		7.41724	7.49081	7.53663		8.53617	8.21331	8.27293		9.20153	9.35407	9.35407		8.77699	8.64325	8.88726
7.71845	4.68258	4.43872	4.33027		4.26989	4.22958	4.22958		4.21808	4.19957	4.19957		4.53229	4.53229	4.4644		5.28515	5.28787	5.28406		6.57011	6.57885	6.27214		7.44366	7.51927	7.56373		8.56177	8.2368	8.29625		9.22168	9.37352	9.37352		8.78701	8.65017	8.89696
7.72565	4.68701	4.44339	4.33584		4.27539	4.23586	4.23586		4.22392	4.20604	4.20604		4.54346	4.54346	4.47384		5.30185	5.30521	5.29999		6.59356	6.60248	6.29387		7.47042	7.54767	7.59115		8.58721	8.26011	8.31977		9.24168	9.39336	9.39336		8.79689	8.65697	8.90675
7.73285	4.69145	4.44841	4.34161		4.28112	4.2424	4.2424		4.22997	4.21284	4.21284		4.55437	4.55437	4.48351		5.31916	5.32241	5.31644		6.61698	6.62636	6.31539		7.4974	7.57584	7.61888		8.61244	8.28325	8.34349		9.26152	9.41335	9.41335		8.80644	8.66389	8.91663
7.74005	4.69599	4.4539	4.34751		4.28703	4.24914	4.24914		4.23627	4.21987	4.21987		4.56498	4.56498	4.49346		5.33702	5.33954	5.33348		6.64034	6.65066	6.33674		7.52445	7.60365	7.64691		8.63741	8.30624	8.36743		9.28113	9.43329	9.43329		8.81556	8.67116	8.92658
7.74725	4.70073	4.4599	4.35344		4.29307	4.25598	4.25598		4.24286	4.22701	4.22701		4.57531	4.57531	4.50368		5.35525	5.35674	5.35111		6.66364	6.67548	6.35797		7.55138	7.63098	7.67524		8.66205	8.32919	8.39157		9.30045	9.45305	9.45305		8.82419	8.67889	8.93652
7.75445	4.70573	4.4664	4.35929		4.29918	4.26285	4.26285		4.24976	4.23412	4.23412		4.58547	4.58547	4.51416		5.37364	5.37418	5.36925		6.68692	6.70081	6.37913		7.57809	7.65783	7.70388		8.68633	8.35219	8.41583		9.31939	9.47256	9.47256		8.83233	8.68707	8.94626
7.76165	4.71107	4.47332	4.36494		4.30525	4.26968	4.26968		4.25693	4.24115	4.24115		4.59563	4.59563	4.52491		5.39202	5.39198	5.38781		6.71027	6.72656	6.40034		7.60454	7.6843	7.73272		8.71029	8.37531	8.44005		9.33794	9.49175	9.49175		8.84001	8.69555	8.9556
7.76885	4.71675	4.48052	4.37034		4.31126	4.27644	4.27644		4.26427	4.24799	4.24799		4.60594	4.60594	4.53593		5.41034	5.41027	5.40665		6.7338	6.75258	6.42174		7.6308	7.71067	7.76156		8.73405	8.39853	8.46406		9.35611	9.51051	9.51051		8.84729	8.70414	8.96433
7.77605	4.72272	4.48785	4.37546		4.31721	4.28311	4.28311		4.27161	4.2546	4.2546		4.61656	4.61656	4.54722		5.42866	5.42907	5.42568		6.75765	6.7787	6.44341		7.65701	7.73721	7.7902		8.75776	8.42179	8.4877		9.37393	9.52874	9.52874		8.85428	8.7126	8.97236
7.78325	4.72893	4.49513	4.3804		4.32314	4.28977	4.28977		4.2789	4.26099	4.26099		4.62755	4.62755	4.55884		5.44704	5.44834	5.44482		6.78191	6.80478	6.46539		7.68331	7.76415	7.81857		8.78154	8.44501	8.51092		9.39146	9.5464	9.5464		8.86112	8.72077	8.9797
7.79045	4.73527	4.50218	4.3853		4.32914	4.29649	4.29649		4.28609	4.26724	4.26724		4.63892	4.63892	4.5708		5.46554	5.46803	5.46401		6.80656	6.83072	6.48767		7.70989	7.79163	7.84668		8.80551	8.46807	8.53373		9.40878	9.56357	9.56357		8.86801	8.72862	8.9864
7.79765	4.7417	4.50888	4.39036		4.33528	4.30335	4.30335		4.29318	4.27347	4.27347		4.65063	4.65063	4.58307		5.48418	5.48798	5.48318		6.83159	6.85649	6.51022		7.73691	7.8197	7.87457		8.82978	8.49085	8.55625		9.42605	9.58039	9.58039		8.87502	8.7362	8.99253
7.80485	4.74816	4.51519	4.39575		4.34159	4.31033	4.31033		4.30019	4.27984	4.27984		4.66259	4.66259	4.59561		5.50297	5.50802	5.50232		6.85696	6.88205	6.53303		7.76449	7.84837	7.90231		8.85448	8.5133	8.57858		9.44342	9.597	9.597		8.88218	8.74359	8.99822
7.81205	4.7546	4.52109	4.40164		4.34811	4.31737	4.31737		4.30713	4.28649	4.28649		4.6747	4.6747	4.60836		5.52191	5.52799	5.52145		6.88263	6.90739	6.55606		7.79266	7.87751	7.92993		8.87968	8.5354	8.60085		9.46106	9.61355	9.61355		8.88945	8.75093	9.00367
7.81925	4.76094	4.52665	4.40814		4.35483	4.32444	4.32444		4.31405	4.29351	4.29351		4.68683	4.68683	4.6212		5.54093	5.54779	5.54063		6.90852	6.93251	6.57927		7.82131	7.90691	7.95755		8.90535	8.55724	8.62317		9.47902	9.63014	9.63014		8.89675	8.75835	9.0091
7.82645	4.7672	4.53196	4.41527		4.36175	4.33152	4.33152		4.32103	4.30098	4.30098		4.6989	4.6989	4.63398		5.55992	5.56738	5.55992		6.93454	6.95748	6.6026		7.85028	7.9363	7.98533		8.93136	8.57893	8.64567		9.49727	9.64693	9.64693		8.90402	8.76594	9.01477
7.83365	4.77343	4.53717	4.42298		4.36884	4.33857	4.33857		4.32819	4.30893	4.30893		4.71085	4.71085	4.64651		5.57875	5.58676	5.57935		6.96058	6.98234	6.62604		7.87934	7.96552	8.01341		8.95751	8.60057	8.6684		9.51576	9.66405	9.66405		8.91119	8.7737	9.02079
7.84085	4.77966	4.54242	4.43113		4.37603	4.3456	4.3456		4.33552	4.31736	4.31736		4.72273	4.72273	4.65869		5.59746	5.60592	5.59896		6.98662	7.00713	6.64958		7.90825	7.9945	8.04187		8.98353	8.62216	8.69132		9.5344	9.68151	9.68151		8.91817	8.78158	9.02715
7.84805	4.78595	4.54788	4.43955		4.38327	4.35262	4.35262		4.343	4.32625	4.32625		4.73458	4.73458	4.67045		5.61617	5.62489	5.61872		7.01266	7.03188	6.67322		7.93678	8.02335	8.07064		9.00913	8.64369	8.71434		9.55305	9.69924	9.69924		8.92491	8.78944	9.03378
7.85525	4.79228	4.55367	4.44809		4.3905	4.35969	4.35969		4.35054	4.33555	4.33555		4.74648	4.74648	4.6818		5.63506	5.64373	5.63863		7.03871	7.05663	6.69696		7.96479	8.05219	8.09958		9.0341	8.66513	8.73734		9.57155	9.71708	9.71708		8.93139	8.79714	9.04055
7.86245	4.79868	4.55989	4.45663		4.39777	4.3669	4.3669		4.35812	4.34517	4.34517		4.75851	4.75851	4.69278		5.65428	5.66252	5.65864		7.06475	7.08144	6.72072		7.99227	8.08115	8.1285		9.05832	8.68645	8.7602		9.58979	9.73485	9.73485		8.93759	8.80452	9.04739
7.86965	4.80518	4.56656	4.46512		4.40511	4.37438	4.37438		4.36575	4.35505	4.35505		4.77071	4.77071	4.70353		5.67386	5.68138	5.67869		7.09076	7.10644	6.74448		8.01932	8.11031	8.15724		9.08179	8.70762	8.78286		9.6077	9.7525	9.7525		8.94359	8.81145	9.05426
7.87685	4.81182	4.57365	4.47349		4.41256	4.38219	4.38219		4.37346	4.36509	4.36509		4.78316	4.78316	4.71416		5.69382	5.70039	5.69874		7.11671	7.13167	6.7682		8.04614	8.13972	8.18567		9.10461	8.72863	8.80529		9.62531	9.77008	9.77008		8.94944	8.81786	9.06107
7.88405	4.8186	4.58111	4.48174		4.42018	4.39031	4.39031		4.38129	4.37519	4.37519		4.79594	4.79594	4.72477		5.71414	5.71961	5.71877		7.14267	7.15715	6.79188		8.07294	8.16936	8.21376		9.12699	8.7495	8.82747		9.64261	9.78771	9.78771		8.95519	8.82375	9.06778
7.89125	4.8255	4.58884	4.48989		4.42798	4.39865	4.39865		4.38923	4.3853	4.3853		4.80915	4.80915	4.7355		5.73479	5.73913	5.73882		7.1687	7.18281	6.81557		8.09993	8.19916	8.24149		9.14915	8.77041	8.84941		9.6595	9.80548	9.80548		8.96086	8.82924	9.07437
7.89845	4.83247	4.59677	4.49797		4.43595	4.40714	4.40714		4.3973	4.39535	4.39535		4.82279	4.82279	4.74648		5.75567	5.75904	5.75892		7.19478	7.20862	6.83933		8.12725	8.22901	8.26889		9.17138	8.79155	8.87123		9.6759	9.82345	9.82345		8.96644	8.83443	9.08087
7.90565	4.83952	4.60482	4.50599		4.4441	4.41568	4.41568		4.40553	4.40524	4.40524		4.83685	4.83685	4.75779		5.77665	5.77942	5.77911		7.22085	7.23452	6.8633		8.15502	8.25878	8.29605		9.19384	8.8131	8.89307		9.6917	9.84162	9.84162		8.97192	8.83953	9.08731
7.91285	4.84666	4.61295	4.51396		4.45243	4.42417	4.42417		4.41396	4.41487	4.41487		4.85128	4.85128	4.7695		5.79763	5.80036	5.79948		7.24685	7.26053	6.8876		8.18319	8.28837	8.32317		9.21664	8.83511	8.91505		9.70684	9.85996	9.85996		8.97731	8.84469	9.09361
7.92005	4.85388	4.62114	4.5218		4.46087	4.43251	4.43251		4.42262	4.42415	4.42415		4.86608	4.86608	4.78169		5.81864	5.82184	5.82018		7.2728	7.2866	6.91232		8.2116	8.31771	8.35048		9.23974	8.85755	8.93725		9.72136	9.8784	9.8784		8.98268	8.85013	9.09965
7.92725	4.86118	4.62942	4.52948		4.46936	4.44063	4.44063		4.43152	4.43305	4.43305		4.88117	4.88117	4.7944		5.83979	5.84379	5.8413		7.29874	7.31273	6.93751		8.24007	8.34683	8.37815		9.26304	8.88028	8.95965		9.73535	9.89677	9.89677		8.98806	8.85601	9.10527
7.93445	4.86856	4.63784	4.53698		4.47788	4.44852	4.44852		4.44071	4.44159	4.44159		4.89648	4.89648	4.80768		5.86125	5.86603	5.86289		7.32473	7.33892	6.96311		8.26848	8.37585	8.40623		9.28642	8.90313	8.98216		9.74894	9.91488	9.91488		8.99349	8.86239	9.11035
7.94165	4.876	4.64641	4.54432		4.4864	4.45628	4.45628		4.45023	4.44982	4.44982		4.91187	4.91187	4.82154		5.88312	5.88846	5.88496		7.35076	7.36521	6.98906		8.29681	8.40493	8.43472		9.30972	8.92593	9.00469		9.76237	9.93249	9.93249		8.99897	8.86921	9.11484
7.94885	4.88355	4.65512	4.55157		4.49497	4.46402	4.46402		4.46012	4.45786	4.45786		4.92725	4.92725	4.83595		5.90547	5.91096	5.90742		7.37687	7.39166	7.01521		8.32508	8.43417	8.46355		9.3328	8.94849	9.02711		9.77589	9.94952	9.94952		9.00448	8.87634	9.11877
7.95605	4.89126	4.66393	4.5588		4.50364	4.47187	4.47187		4.47038	4.46581	4.46581		4.94257	4.94257	4.85081		5.92831	5.93351	5.93021		7.40315	7.41828	7.04139		8.35339	8.46355	8.49269		9.35557	8.97064	9.04925		9.78978	9.96596	9.96596		9.00999	8.8836	9.12222
7.96325	4.89922	4.67278	4.56611		4.51245	4.47994	4.47994		4.48099	4.47388	4.47388		4.95784	4.95784	4.86601		5.95165	5.95605	5.95323		7.42972	7.44507	7.06742		8.38186	8.49298	8.52213		9.37799	8.99227	9.071		9.8042	9.9819	9.9819		9.01543	8.89081	9.12533
7.97045	4.90748	4.68161	4.57363		4.52143	4.48829	4.48829		4.49186	4.48228	4.48228		4.9731	4.9731	4.88145		5.97544	5.97855	5.97639		7.45668	7.472	7.09315		8.41059	8.52236	8.55184		9.40001	9.0134	9.09228		9.81925	9.99737	9.99737		9.0207	8.89776	9.12827
7.97765	4.9161	4.69037	4.58147		4.53061	4.49698	4.49698		4.50288	4.49119	4.49119		4.98835	4.98835	4.89705		5.99958	6.00102	5.99957		7.48407	7.49902	7.11849		8.43966	8.55165	8.58179		9.42169	9.03414	9.11312		9.83483	10.0124	10.0124		9.0257	8.90428	9.13119
7.98485	4.92511	4.69904	4.5897		4.54001	4.50601	4.50601		4.51393	4.50077	4.50077		5.00364	5.00364	4.91275		6.02391	6.02353	6.02267		7.51187	7.52611	7.14342		8.46905	8.58079	8.61196		9.44309	9.05467	9.1336		9.85077	10.027	10.027		9.03035	8.91024	9.13423
7.99205	4.93454	4.70762	4.59836		4.54962	4.51534	4.51534		4.52483	4.51109	4.51109		5.019	5.019	4.92848		6.0483	6.04624	6.04562		7.54001	7.55325	7.16799		8.49858	8.60969	8.64229		9.46431	9.07512	9.15386		9.86685	10.0412	10.0412		9.03468	8.91557	9.13745
7.99925	4.94435	4.71619	4.60741		4.55939	4.52495	4.52495		4.53548	4.52213	4.52213		5.03449	5.03449	4.94412		6.07259	6.06924	6.06841		7.56842	7.58045	7.19226		8.52804	8.63832	8.67275		9.48547	9.09562	9.17404		9.88286	10.0551	10.0551		9.0387	8.92028	9.14079
8.00645	4.9545	4.72485	4.61678		4.5693	4.53478	4.53478		4.54579	4.53379	4.53379		5.05012	5.05012	4.95961		6.0967	6.09257	6.09114		7.59699	7.60775	7.21626		8.55723	8.66672	8.70329		9.50665	9.11627	9.19421		9.89866	10.0688	10.0688		9.04249	8.92434	9.1442
8.01365	4.96488	4.73375	4.62644		4.57934	4.54479	4.54479		4.55576	4.54594	4.54594		5.06586	5.06586	4.97491		6.12059	6.11614	6.11387		7.62553	7.63523	7.24007		8.58604	8.69502	8.73379		9.52792	9.13721	9.21445		9.91414	10.0822	10.0822		9.04614	8.92771	9.1477
8.02085	4.97533	4.74298	4.63637		4.58947	4.55496	4.55496		4.56544	4.55844	4.55844		5.08174	5.08174	4.98997		6.14427	6.13986	6.1367		7.6539	7.66301	7.2638		8.61448	8.72338	8.76412		9.54931	9.15854	9.23478		9.92917	10.0955	10.0955		9.0498	8.93039	9.15133
8.02805	4.98573	4.75255	4.64653		4.59969	4.56528	4.56528		4.57496	4.57111	4.57111		5.09779	5.09779	5.00477		6.1678	6.16361	6.15967		7.68201	7.69116	7.28759		8.64269	8.75185	8.79413		9.57085	9.18027	9.25514		9.94366	10.1086	10.1086		9.05361	8.93244	9.15514
8.03525	4.99598	4.76243	4.65691		4.60995	4.57579	4.57579		4.58443	4.58383	4.58383		5.11409	5.11409	5.01932		6.19121	6.18735	6.18284		7.70987	7.71972	7.31156		8.67082	8.7804	8.82369		9.59251	9.20235	9.27546		9.95755	10.1216	10.1216		9.05768	8.93399	9.15912
8.04245	5.00603	4.7726	4.66748		4.62021	4.58651	4.58651		4.59396	4.59648	4.59648		5.13073	5.13073	5.03365		6.21457	6.21099	6.20625		7.73754	7.74871	7.3358		8.69912	8.80899	8.85271		9.61418	9.22472	9.29568		9.9708	10.1347	10.1347		9.06199	8.93521	9.1632
8.04965	5.01595	4.78297	4.67821		4.63049	4.59751	4.59751		4.6037	4.60899	4.60899		5.14773	5.14773	5.04789		6.2379	6.23452	6.22995		7.76507	7.77814	7.36032		8.72775	8.83759	8.88119		9.63576	9.24725	9.31577		9.98343	10.1477	10.1477		9.06639	8.93629	9.16737
8.05685	5.02577	4.79348	4.68907		4.64078	4.60882	4.60882		4.61378	4.62138	4.62138		5.16511	5.16511	5.06223		6.26127	6.25792	6.25393		7.79253	7.80795	7.38515		8.75678	8.86618	8.90922		9.65715	9.26978	9.33582		9.99553	10.1606	10.1606		9.07075	8.93737	9.17165
8.06405	5.03558	4.80406	4.70005		4.65109	4.6204	4.6204		4.62425	4.63368	4.63368		5.18284	5.18284	5.07689		6.2847	6.28124	6.27813		7.81999	7.83809	7.41031		8.78618	8.89472	8.93691		9.67828	9.29207	9.35587		10.0072	10.1731	10.1731		9.07491	8.93865	9.17599
8.07125	5.04553	4.81469	4.71109		4.66142	4.63225	4.63225		4.63517	4.64593	4.64593		5.20085	5.20085	5.09204		6.3082	6.30462	6.30245		7.84755	7.86841	7.43581		8.81581	8.92324	8.96443		9.69912	9.31387	9.37595		10.0185	10.1855	10.1855		9.07876	8.94026	9.18029
8.07845	5.05581	4.82534	4.72212		4.67179	4.64427	4.64427		4.64647	4.65817	4.65817		5.21901	5.21901	5.1078		6.33177	6.32817	6.32682		7.87526	7.89873	7.4616		8.84548	8.95176	8.99195		9.71964	9.33495	9.39606		10.0296	10.1977	10.1977		9.08217	8.94229	9.18431
8.08565	5.06655	4.83609	4.7331		4.68227	4.65643	4.65643		4.65806	4.67048	4.67048		5.23716	5.23716	5.12417		6.3554	6.35202	6.35123		7.90309	7.92887	7.48758		8.87499	8.98036	9.01968		9.7398	9.35514	9.41625		10.0409	10.21	10.21		9.08496	8.94473	9.18791
8.09285	5.07779	4.84702	4.74402		4.69294	4.66864	4.66864		4.66986	4.6829	4.6829		5.25513	5.25513	5.14112		6.37912	6.37621	6.37565		7.931	7.95864	7.51367		8.90421	9.0091	9.04788		9.75961	9.37435	9.43659		10.0525	10.2223	10.2223		9.08704	8.94747	9.19099
8.10005	5.08945	4.85816	4.75487		4.70387	4.68087	4.68087		4.68181	4.69551	4.69551		5.27286	5.27286	5.15862		6.40302	6.40073	6.40007		7.95892	7.98795	7.53978		8.93306	9.038	9.07673		9.77914	9.39261	9.45713		10.0646	10.2349	10.2349		9.08839	8.95039	9.19359
8.10725	5.10141	4.86953	4.7657		4.71511	4.69312	4.69312		4.6939	4.70834	4.70834		5.29034	5.29034	5.17662		6.42718	6.42553	6.42453		7.98683	8.01671	7.5659		8.96156	9.06705	9.10634		9.79854	9.4101	9.47786		10.0773	10.2477	10.2477		9.08912	8.95338	9.19574
8.11445	5.11354	4.88113	4.77653		4.7267	4.70538	4.70538		4.7061	4.72142	4.72142		5.30769	5.30769	5.19504		6.45169	6.45054	6.44904		8.01474	8.04487	7.59202		8.98982	9.09619	9.13672		9.81798	9.42703	9.49874		10.0905	10.2608	10.2608		9.08937	8.95635	9.19744
8.12165	5.12577	4.8929	4.78739		4.73865	4.71769	4.71769		4.71844	4.73475	4.73475		5.32504	5.32504	5.21374		6.47656	6.47573	6.47364		8.04267	8.07243	7.61807		9.01795	9.12541	9.16772		9.83761	9.4437	9.51974		10.1041	10.2742	10.2742		9.0893	8.95924	9.19867
8.12885	5.13796	4.90483	4.79834		4.75098	4.73013	4.73013		4.73102	4.74833	4.74833		5.34259	5.34259	5.23257		6.50184	6.50108	6.49842		8.07059	8.09941	7.64403		9.04607	9.15468	9.19918		9.85755	9.4604	9.54086		10.1178	10.2875	10.2875		9.08901	8.96198	9.19949
8.13605	5.14995	4.91689	4.80943		4.76365	4.74275	4.74275		4.7439	4.76215	4.76215		5.3605	5.3605	5.25139		6.5275	6.52665	6.52339		8.09854	8.12592	7.66987		9.07427	9.18403	9.23087		9.87789	9.47744	9.56209		10.1313	10.3006	10.3006		9.08856	8.96446	9.19999
8.14325	5.16161	4.92904	4.8207		4.77663	4.75556	4.75556		4.75714	4.77615	4.77615		5.37891	5.37891	5.27015		6.55351	6.55255	6.54855		8.12649	8.1521	7.69564		9.10256	9.2135	9.26251		9.89864	9.49507	9.58335		10.1444	10.3132	10.3132		9.08808	8.96661	9.20027
8.15045	5.17294	4.9413	4.83218		4.78983	4.76851	4.76851		4.77076	4.79025	4.79025		5.39788	5.39788	5.2888		6.57983	6.57888	6.57383		8.15446	8.17817	7.72146		9.1309	9.24307	9.29385		9.91977	9.51344	9.60448		10.1569	10.325	10.325		9.08764	8.96839	9.20042
8.15765	5.18405	4.95367	4.84393		4.80319	4.78152	4.78152		4.78467	4.8044	4.8044		5.4174	5.4174	5.3073		6.60637	6.60574	6.59914		8.18241	8.20435	7.74744		9.15917	9.27278	9.32465		9.94121	9.53256	9.6253		10.1685	10.3361	10.3361		9.08734	8.96975	9.2005
8.16485	5.19508	4.96617	4.85597		4.81662	4.79453	4.79453		4.79875	4.81854	4.81854		5.43739	5.43739	5.3256		6.63306	6.63319	6.62445		8.21024	8.23081	7.77366		9.18726	9.30253	9.35482		9.96276	9.55232	9.64568		10.1792	10.3467	10.3467		9.0872	8.97075	9.20064
8.17205	5.20617	4.97882	4.86833		4.83009	4.80746	4.80746		4.81286	4.83268	4.83268		5.45769	5.45769	5.34367		6.65984	6.66125	6.64977		8.2379	8.2577	7.80019		9.21511	9.3322	9.38445		9.9842	9.57252	9.66555		10.1892	10.3569	10.3569		9.08719	8.97139	9.201
8.17925	5.21742	4.99165	4.88101		4.84357	4.82031	4.82031		4.82687	4.84681	4.84681		5.47817	5.47817	5.36163		6.68667	6.68985	6.67513		8.2653	8.28516	7.82707		9.24267	9.36164	9.41371		10.0053	9.59296	9.68489		10.1987	10.3668	10.3668		9.08727	8.97169	9.20174
8.18645	5.229	5.00463	4.89402		4.85705	4.83307	4.83307		4.84073	4.86097	4.86097		5.49864	5.49864	5.37971		6.71357	6.71881	6.70059		8.29244	8.31336	7.85429		9.26993	9.39066	9.44278		10.0259	9.61338	9.7037		10.2078	10.3766	10.3766		9.08748	8.97172	9.20299
8.19365	5.24108	5.01771	4.90732		4.87056	4.84583	4.84583		4.85442	4.8752	4.8752		5.519	5.519	5.39812		6.74056	6.74793	6.72625		8.31931	8.34236	7.88178		9.29694	9.41918	9.47185		10.046	9.63352	9.72199		10.2169	10.3864	10.3864		9.08782	8.97159	9.20479
8.20085	5.25382	5.0308	4.92086		4.88409	4.8587	4.8587		4.86805	4.88958	4.88958		5.53923	5.53923	5.41701		6.76773	6.77697	6.75221		8.34599	8.37216	7.90937		9.32377	9.44718	9.50099		10.0656	9.65313	9.73978		10.2261	10.3962	10.3962		9.08831	8.97144	9.20711
8.20805	5.26726	5.04383	4.93462		4.89768	4.87188	4.87188		4.88173	4.90421	4.90421		5.55933	5.55933	5.43644		6.79507	6.80577	6.77865		8.37258	8.40257	7.93684		9.35056	9.47475	9.53031		10.0847	9.67203	9.75717		10.2356	10.4061	10.4061		9.08893	8.97139	9.20987
8.21525	5.28128	5.05673	4.94853		4.91136	4.88553	4.88553		4.89564	4.91915	4.91915		5.57942	5.57942	5.45639		6.82263	6.83423	6.80566		8.39922	8.43337	7.96402		9.37748	9.50207	9.55983		10.1034	9.69017	9.77426		10.2456	10.4159	10.4159		9.08967	8.97147	9.21292
8.22245	5.29569	5.06948	4.96255		4.92514	4.89976	4.89976		4.90991	4.93444	4.93444		5.59965	5.59965	5.47681		6.85042	6.86234	6.83331		8.42609	8.46431	7.99083		9.40471	9.52932	9.58951		10.1215	9.70756	9.79109		10.256	10.4256	10.4256		9.09047	8.97163	9.21602
8.22965	5.31027	5.08211	4.97663		4.93906	4.9146	4.9146		4.92463	4.95012	4.95012		5.62021	5.62021	5.49762		6.8785	6.89018	6.86156		8.45332	8.49524	8.01734		9.43235	9.55675	9.61924		10.1391	9.72427	9.80767		10.2669	10.4351	10.4351		9.09128	8.97174	9.21887
8.23685	5.32481	5.09469	4.99075		4.95314	4.93003	4.93003		4.93982	4.96617	4.96617		5.64125	5.64125	5.5187		6.90695	6.91786	6.89032		8.48098	8.52605	8.04373		9.46045	9.58453	9.64891		10.1562	9.74036	9.82401		10.2782	10.4445	10.4445		9.092	8.97171	9.22124
8.24405	5.33916	5.10733	5.00488		4.96737	4.94599	4.94599		4.95543	4.98254	4.98254		5.66288	5.66288	5.53983		6.93581	6.94549	6.91956		8.50906	8.55662	8.07019		9.48901	9.61276	9.67844		10.1727	9.75594	9.84016		10.2898	10.4537	10.4537		9.09252	8.9715	9.22292
8.25125	5.35322	5.12013	5.01905		4.98174	4.96236	4.96236		4.97136	4.99914	4.99914		5.68515	5.68515	5.56086		6.96511	6.97321	6.94919		8.53753	8.58689	8.09685		9.51796	9.64146	9.70778		10.1888	9.77113	9.85619		10.3016	10.4627	10.4627		9.09268	8.97108	9.22381
8.25845	5.36694	5.13322	5.03328		4.99625	4.979	4.979		4.98749	5.01585	5.01585		5.70801	5.70801	5.58171		6.99486	7.00116	6.97907		8.56628	8.61685	8.12382		9.54724	9.6705	9.73696		10.2046	9.78605	9.87217		10.3135	10.4717	10.4717		9.09242	8.97046	9.22382
8.26565	5.38045	5.14673	5.04765		5.01094	4.9957	4.9957		5.00375	5.03258	5.03258		5.73133	5.73133	5.60248		7.02503	7.02937	7.00903		8.59526	8.64655	8.15117		9.57671	9.69974	9.76603		10.2201	9.80085	9.88814		10.3253	10.4806	10.4806		9.09171	8.96966	9.22288
8.27285	5.39391	5.16083	5.06223		5.02585	5.01233	5.01233		5.02008	5.04923	5.04923		5.75485	5.75485	5.62331		7.05557	7.05787	7.03893		8.62438	8.67608	8.17893		9.60625	9.72902	9.79503		10.2356	9.81566	9.90416		10.3367	10.4895	10.4895		9.0906	8.96877	9.22104
8.28005	5.40761	5.17558	5.07709		5.04099	5.02884	5.02884		5.03647	5.06576	5.06576		5.77837	5.77837	5.64438		7.08635	7.08658	7.0687		8.65362	8.70543	8.20698		9.63574	9.7582	9.82404		10.2512	9.83059	9.92029		10.3477	10.4985	10.4985		9.08918	8.9679	9.21842
8.28725	5.42178	5.19101	5.0923		5.05638	5.04524	5.04524		5.05301	5.08214	5.08214		5.80176	5.80176	5.66576		7.11716	7.11541	7.09831		8.68295	8.73458	8.23516		9.66515	9.78723	9.85311		10.2673	9.84576	9.93658		10.3581	10.5077	10.5077		9.08755	8.96716	9.21525
8.29445	5.43656	5.20705	5.10798		5.07205	5.06154	5.06154		5.06976	5.09849	5.09849		5.82492	5.82492	5.68748		7.14778	7.14433	7.1277		8.71236	8.76349	8.26323		9.69446	9.81607	9.88225		10.2839	9.8613	9.95308		10.3677	10.5172	10.5172		9.08585	8.96655	9.21175
8.30165	5.452	5.2236	5.12418		5.08803	5.07782	5.07782		5.08679	5.11493	5.11493		5.8479	5.8479	5.70959		7.178	7.17333	7.15683		8.74187	8.79208	8.29111		9.72366	9.84472	9.91151		10.3009	9.87727	9.96976		10.3764	10.5269	10.5269		9.08414	8.96594	9.20808
8.30885	5.46808	5.24056	5.14091		5.10436	5.09414	5.09414		5.10412	5.13166	5.13166		5.87072	5.87072	5.73205		7.20775	7.20245	7.18566		8.7715	8.82037	8.31876		9.75276	9.8732	9.9409		10.3183	9.89373	9.98662		10.3842	10.5367	10.5367		9.08248	8.96512	9.20438
8.31605	5.48468	5.25779	5.1581		5.12105	5.11063	5.11063		5.12179	5.14886	5.14886		5.89355	5.89355	5.75482		7.23702	7.23177	7.21424		8.80126	8.84832	8.34623		9.7817	9.90158	9.9704		10.336	9.9106	10.0036		10.3911	10.5464	10.5464		9.0809	8.96388	9.20079
8.32325	5.50168	5.27509	5.17561		5.13809	5.1274	5.1274		5.13975	5.1667	5.1667		5.9166	5.9166	5.77775		7.26592	7.26137	7.24271		8.83106	8.87599	8.3735		9.81047	9.92997	9.99997		10.3537	9.92771	10.0207		10.3972	10.5559	10.5559		9.07942	8.96203	9.19744
8.33045	5.51888	5.29227	5.19328		5.15543	5.14454	5.14454		5.15794	5.18527	5.18527		5.94007	5.94007	5.80072		7.29451	7.29141	7.27119		8.86074	8.90349	8.40052		9.83902	9.95846	10.0295		10.3713	9.94485	10.0379		10.4027	10.5647	10.5647		9.07808	8.95948	9.19443
8.33765	5.53615	5.30919	5.21101		5.17299	5.16209	5.16209		5.17623	5.20459	5.20459		5.9641	5.9641	5.82365		7.3229	7.32197	7.29979		8.89013	8.93097	8.42719		9.86732	9.98706	10.059		10.3888	9.9618	10.0551		10.4079	10.5727	10.5727		9.0769	8.95627	9.19181
8.34485	5.55336	5.32582	5.22873		5.19074	5.18001	5.18001		5.19452	5.22458	5.22458		5.98864	5.98864	5.84659		7.35128	7.35309	7.32862		8.91914	8.95862	8.45342		9.89529	10.0157	10.0884		10.4059	9.97835	10.0722		10.4129	10.5798	10.5798		9.0759	8.95249	9.18958
8.35205	5.57046	5.34225	5.24638		5.20866	5.19825	5.19825		5.21274	5.24508	5.24508		6.0136	6.0136	5.86966		7.37982	7.38471	7.35787		8.94774	8.98655	8.47913		9.92295	10.0441	10.1177		10.4226	9.9943	10.0891		10.4181	10.5861	10.5861		9.07509	8.94841	9.18771
8.35925	5.58744	5.3586	5.26393		5.22678	5.21676	5.21676		5.23088	5.2659	5.2659		6.03889	6.03889	5.89299		7.40867	7.41672	7.38771		8.97593	9.01483	8.50427		9.95032	10.0724	10.147		10.4389	10.0095	10.1058		10.4235	10.5915	10.5915		9.07449	8.94433	9.18615
8.36645	5.60433	5.37501	5.28142		5.24512	5.23549	5.23549		5.24895	5.28688	5.28688		6.06443	6.06443	5.91667		7.43786	7.44897	7.4183		9.00373	9.04349	8.5288		9.9775	10.1002	10.1764		10.4548	10.024	10.1221		10.4294	10.5966	10.5966		9.07398	8.94059	9.18484
8.37365	5.6212	5.39163	5.29901		5.26373	5.2544	5.2544		5.26701	5.30792	5.30792		6.09016	6.09016	5.94075		7.46734	7.48127	7.44966		9.0312	9.07255	8.55286		10.0045	10.1276	10.2057		10.4704	10.0378	10.138		10.4356	10.6016	10.6016		9.07338	8.93743	9.18372
8.38085	5.63813	5.4086	5.31684		5.28264	5.27344	5.27344		5.28511	5.32894	5.32894		6.116	6.116	5.96524		7.49708	7.51352	7.48169		9.05849	9.10199	8.57665		10.0315	10.1545	10.2352		10.4859	10.0512	10.1535		10.4421	10.6067	10.6067		9.07235	8.93497	9.18273
8.38805	5.65521	5.42601	5.33503		5.30189	5.29259	5.29259		5.30334	5.34987	5.34987		6.14189	6.14189	5.99015		7.52711	7.54561	7.51423		9.08582	9.13169	8.60057		10.0586	10.1808	10.2646		10.5015	10.0643	10.1685		10.4489	10.6122	10.6122		9.07066	8.9331	9.18176
8.39525	5.67254	5.44392	5.35359		5.32147	5.31186	5.31186		5.32176	5.37072	5.37072		6.16789	6.16789	6.01539		7.55749	7.57753	7.54704		9.11334	9.16151	8.62505		10.0857	10.2068	10.2941		10.517	10.0775	10.1833		10.4559	10.618	10.618		9.06813	8.93162	9.18065
8.40245	5.69019	5.46232	5.37243		5.34135	5.33132	5.33132		5.34047	5.39151	5.39151		6.1941	6.1941	6.04078		7.5882	7.60929	7.57991		9.14114	9.19129	8.65049		10.1129	10.2326	10.3232		10.5326	10.0908	10.1978		10.4629	10.6242	10.6242		9.06472	8.93025	9.17925
8.40965	5.7082	5.48115	5.39149		5.36143	5.351	5.351		5.35948	5.41232	5.41232		6.22067	6.22067	6.06615		7.61921	7.64095	7.61256		9.16925	9.22098	8.67711		10.1403	10.2588	10.3519		10.548	10.1043	10.2121		10.4697	10.6306	10.6306		9.06044	8.92873	9.17742
8.41685	5.72663	5.50042	5.4107		5.38158	5.37093	5.37093		5.3788	5.43318	5.43318		6.24766	6.24766	6.09136		7.65042	7.67261	7.6448		9.19772	9.25055	8.70498		10.1677	10.2854	10.3797		10.5633	10.1181	10.2263		10.4764	10.637	10.637		9.05543	8.92684	9.17513
8.42405	5.7455	5.52009	5.43		5.40166	5.39117	5.39117		5.39844	5.45412	5.45412		6.27508	6.27508	6.11634		7.68185	7.70437	7.67649		9.22658	9.28001	8.73395		10.1951	10.3126	10.4068		10.5781	10.1321	10.2404		10.4827	10.6433	10.6433		9.04988	8.9244	9.17239
8.43125	5.76481	5.54021	5.44931		5.42158	5.41177	5.41177		5.41838	5.47515	5.47515		6.30285	6.30285	6.14115		7.71349	7.73625	7.7077		9.25579	9.30935	8.76369		10.2227	10.3406	10.433		10.5924	10.1462	10.2547		10.4888	10.6494	10.6494		9.04414	8.92131	9.16919
8.43845	5.78455	5.56083	5.46858		5.44133	5.43281	5.43281		5.43863	5.49628	5.49628		6.33096	6.33096	6.16585		7.74536	7.76829	7.73859		9.28522	9.33855	8.79379		10.2504	10.3693	10.4583		10.606	10.1602	10.269		10.4945	10.6552	10.6552		9.03852	8.9176	9.16557
8.44565	5.8047	5.58197	5.48784		5.46099	5.45433	5.45433		5.45918	5.51761	5.51761		6.35931	6.35931	6.19055		7.77747	7.80046	7.76943		9.31473	9.36758	8.82379		10.278	10.3986	10.483		10.6188	10.174	10.2834		10.4998	10.661	10.661		9.03326	8.91342	9.16158
8.45285	5.82522	5.60363	5.50723		5.48067	5.4763	5.4763		5.48003	5.53927	5.53927		6.38786	6.38786	6.21539		7.80983	7.83275	7.80048		9.34424	9.3965	8.85327		10.3056	10.4283	10.5073		10.6308	10.1876	10.2977		10.5046	10.6668	10.6668		9.02846	8.90894	9.15729
8.46005	5.84609	5.62569	5.52693		5.50047	5.49866	5.49866		5.50119	5.56138	5.56138		6.41647	6.41647	6.24059		7.8425	7.86517	7.83198		9.37372	9.42537	8.882		10.3332	10.4581	10.5317		10.6424	10.2009	10.3121		10.5089	10.6727	10.6727		9.02408	8.90441	9.15285
8.46725	5.86728	5.64796	5.54709		5.5205	5.52132	5.52132		5.52267	5.58401	5.58401		6.44506	6.44506	6.26634		7.87557	7.89778	7.86408		9.40325	9.45424	8.90988		10.3608	10.4878	10.5564		10.6536	10.214	10.3265		10.5128	10.6788	10.6788		9.02004	8.89997	9.14831
8.47445	5.88875	5.67022	5.56778		5.54088	5.54418	5.54418		5.54448	5.60719	5.60719		6.4736	6.4736	6.29281		7.90904	7.93059	7.89682		9.43289	9.48319	8.937		10.3882	10.5173	10.582		10.6648	10.2269	10.3409		10.5163	10.685	10.685		9.01623	8.89571	9.14371
8.48165	5.91046	5.69229	5.58904		5.56172	5.5671	5.5671		5.56664	5.63093	5.63093		6.50214	6.50214	6.32009		7.94289	7.9637	7.93013		9.46267	9.51225	8.9636		10.4152	10.5463	10.6085		10.6762	10.2398	10.3553		10.5196	10.6913	10.6913		9.01256	8.89165	9.13906
8.48885	5.93236	5.71407	5.61087		5.5831	5.58999	5.58999		5.58916	5.65521	5.65521		6.53076	6.53076	6.34819		7.97712	7.99711	7.96384		9.49267	9.54151	8.99		10.4418	10.575	10.6359		10.688	10.2525	10.3696		10.5228	10.6973	10.6973		9.00892	8.88785	9.1344
8.49605	5.95443	5.73555	5.63322		5.60506	5.61274	5.61274		5.61201	5.67992	5.67992		6.55951	6.55951	6.37705		8.01167	8.03086	7.9977		9.52296	9.57109	9.01646		10.4678	10.6034	10.6642		10.7002	10.2651	10.3837		10.5259	10.703	10.703		9.00528	8.88425	9.12978
8.50325	5.97667	5.75682	5.65605		5.62757	5.63541	5.63541		5.63517	5.70496	5.70496		6.58847	6.58847	6.40653		8.0465	8.06498	8.03145		9.55361	9.60106	9.04322		10.4933	10.6315	10.6932		10.713	10.2774	10.3976		10.529	10.7083	10.7083		9.00165	8.88074	9.12532
8.51045	5.99903	5.77803	5.67922		5.65059	5.65814	5.65814		5.6586	5.73017	5.73017		6.6177	6.6177	6.43643		8.08153	8.09945	8.06487		9.58455	9.63142	9.07037		10.5183	10.6593	10.7226		10.7261	10.2895	10.4111		10.5322	10.713	10.713		8.99799	8.87715	9.12107
8.51765	6.02148	5.79941	5.70262		5.67409	5.68112	5.68112		5.68227	5.75544	5.75544		6.64724	6.64724	6.46653		8.11669	8.13423	8.09787		9.6156	9.66206	9.09792		10.5428	10.687	10.7521		10.7395	10.3014	10.4241		10.5357	10.7172	10.7172		8.99426	8.87332	9.11705
8.52485	6.04392	5.82119	5.72618		5.69804	5.70452	5.70452		5.70616	5.7807	5.7807		6.67709	6.67709	6.49655		8.15194	8.16925	8.13046		9.64649	9.69282	9.12578		10.5669	10.7145	10.7814		10.7531	10.3131	10.4367		10.5393	10.721	10.721		8.99037	8.86914	9.11321
8.53205	6.06629	5.8436	5.74988		5.7224	5.72851	5.72851		5.73026	5.80598	5.80598		6.70723	6.70723	6.52629		8.18727	8.20445	8.16277		9.67693	9.72351	9.15381		10.5909	10.7419	10.81		10.7665	10.3245	10.4487		10.5428	10.7245	10.7245		8.98627	8.86457	9.10949
8.53925	6.08852	5.86676	5.77376		5.7471	5.75317	5.75317		5.75454	5.83131	5.83131		6.73756	6.73756	6.55558		8.22265	8.23982	8.19499		9.70672	9.75403	9.18189		10.615	10.769	10.8379		10.7795	10.3358	10.4603		10.5463	10.7278	10.7278		8.98188	8.85959	9.10578
8.54645	6.11062	5.89065	5.79789		5.77199	5.7785	5.7785		5.77897	5.85681	5.85681		6.76804	6.76804	6.58442		8.25795	8.27532	8.22734		9.73582	9.78434	9.20992		10.6392	10.7958	10.865		10.7921	10.3471	10.4716		10.5496	10.7308	10.7308		8.97715	8.85422	9.10196
8.55365	6.13264	5.91508	5.82226		5.79696	5.80447	5.80447		5.80351	5.88251	5.88251		6.79862	6.79862	6.6129		8.29303	8.31096	8.26001		9.76423	9.81441	9.23792		10.6638	10.8222	10.8913		10.8041	10.3584	10.4828		10.5526	10.7335	10.7335		8.97202	8.84848	9.09789
8.56085	6.15469	5.93979	5.84689		5.8219	5.83094	5.83094		5.82816	5.90851	5.90851		6.82932	6.82932	6.64122		8.32778	8.34671	8.29315		9.7921	9.84428	9.26591		10.6888	10.8481	10.917		10.8154	10.3696	10.494		10.5556	10.7356	10.7356		8.96648	8.84249	9.09343
8.56805	6.17687	5.96452	5.8718		5.84677	5.85774	5.85774		5.85291	5.93486	5.93486		6.86015	6.86015	6.66961		8.36216	8.38256	8.32687		9.81957	9.874	9.29394		10.7144	10.8737	10.9421		10.8262	10.3805	10.5054		10.5583	10.7371	10.7371		8.96052	8.83634	9.08849
8.57525	6.19934	5.98908	5.89697		5.87155	5.88471	5.88471		5.87779	5.96162	5.96162		6.89119	6.89119	6.69833		8.39623	8.4185	8.36117		9.84688	9.90368	9.32209		10.7406	10.899	10.9669		10.8366	10.3911	10.5168		10.5609	10.7378	10.7378		8.95423	8.83012	9.08304
8.58245	6.22229	6.01335	5.92241		5.89622	5.91172	5.91172		5.9028	5.9888	5.9888		6.92248	6.92248	6.72755		8.43001	8.45452	8.39599		9.8743	9.93341	9.35041		10.7672	10.9239	10.9917		10.8466	10.4013	10.5282		10.5634	10.738	10.738		8.94768	8.82382	9.07714
8.58965	6.24589	6.03726	5.94803		5.92086	5.93873	5.93873		5.92794	6.01634	6.01634		6.95412	6.95412	6.75741		8.46362	8.49065	8.43117		9.90209	9.9632	9.3789		10.7942	10.9485	11.0167		10.8566	10.4111	10.5395		10.5659	10.7378	10.7378		8.94099	8.81746	9.0709
8.59686	6.27026	6.06085	5.97379		5.94558	5.96577	5.96577		5.95326	6.04418	6.04418		6.98616	6.98616	6.78787		8.49717	8.5269	8.46662		9.93044	9.99299	9.40754		10.8214	10.9731	11.0422		10.8666	10.4207	10.5506		10.5684	10.7376	10.7376		8.93425	8.81102	9.06448
8.60406	6.29546	6.08425	5.99961		5.97055	5.99286	5.99286		5.97883	6.07225	6.07225		7.01863	7.01863	6.81883		8.53087	8.56334	8.50227		9.9594	10.0227	9.43623		10.8486	10.9976	11.0684		10.8768	10.4301	10.5615		10.5708	10.7376	10.7376		8.92759	8.80451	9.05805
8.61126	6.32144	6.10775	6.02549		5.99595	6.02	6.02		6.00476	6.10051	6.10051		7.05151	7.05151	6.85014		8.56484	8.59999	8.53812		9.9889	10.0521	9.46478		10.8754	11.0222	11.0953		10.8872	10.4396	10.572		10.573	10.738	10.738		8.92112	8.79791	9.05173
8.61846	6.3481	6.13166	6.05143		6.02197	6.04719	6.04719		6.03119	6.12898	6.12898		7.08473	7.08473	6.88159		8.5992	8.63681	8.57413		10.0188	10.0812	9.49304		10.9016	11.0468	11.1228		10.8977	10.4492	10.5822		10.5749	10.739	10.739		8.91489	8.79119	9.04563
8.62566	6.37535	6.15627	6.07748		6.04873	6.07441	6.07441		6.05819	6.15767	6.15767		7.11821	7.11821	6.91301		8.63391	8.67369	8.61033		10.0489	10.1098	9.52088		10.9269	11.0713	11.1507		10.9082	10.459	10.5923		10.5763	10.7405	10.7405		8.90892	8.78438	9.03981
8.63286	6.40302	6.1817	6.10369		6.07629	6.10169	6.10169		6.08584	6.18656	6.18656		7.1519	7.1519	6.94431		8.66887	8.71047	8.6467		10.079	10.1382	9.54819		10.9515	11.096	11.1788		10.9185	10.4691	10.6022		10.5774	10.7424	10.7424		8.90322	8.77758	9.03423
8.64006	6.43098	6.208	6.13012		6.10462	6.12904	6.12904		6.11415	6.21568	6.21568		7.18579	7.18579	6.97547		8.70399	8.74702	8.68326		10.1091	10.1662	9.57491		10.9753	11.1207	11.2069		10.9284	10.4793	10.612		10.5781	10.7445	10.7445		8.8977	8.77088	9.0288
8.64726	6.45904	6.23512	6.15681		6.13359	6.15653	6.15653		6.14308	6.24505	6.24505		7.21986	7.21986	7.00661		8.73921	8.78318	8.72001		10.1389	10.1941	9.60103		10.9988	11.1457	11.2347		10.9377	10.4894	10.6218		10.5786	10.7467	10.7467		8.8923	8.76435	9.02335
8.65446	6.48705	6.26302	6.18383		6.16302	6.18419	6.18419		6.1725	6.27474	6.27474		7.25406	7.25406	7.03787		8.77454	8.81887	8.75696		10.1684	10.222	9.62659		11.0221	11.171	11.262		10.9464	10.4993	10.6316		10.5791	10.7487	10.7487		8.88692	8.75797	9.01768
8.66166	6.51494	6.29157	6.21121		6.19268	6.21213	6.21213		6.20224	6.30479	6.30479		7.2884	7.2884	7.06947		8.81004	8.85407	8.79406		10.1975	10.2503	9.65176		11.0458	11.1966	11.2886		10.9545	10.5088	10.6416		10.5796	10.7508	10.7508		8.88147	8.75171	9.01168
8.66886	6.54277	6.32059	6.23901		6.22235	6.24046	6.24046		6.23204	6.3352	6.3352		7.3229	7.3229	7.10161		8.84585	8.88891	8.83126		10.2262	10.2789	9.67678		11.0701	11.2225	11.3146		10.9622	10.5178	10.6515		10.5803	10.7529	10.7529		8.87586	8.74559	9.00528
8.67606	6.57063	6.3499	6.26727		6.25182	6.26927	6.26927		6.26166	6.36592	6.36592		7.3576	7.3576	7.13444		8.88209	8.92363	8.86847		10.2544	10.3081	9.70191		11.0953	11.2489	11.3401		10.9699	10.5264	10.6616		10.5811	10.7551	10.7551		8.87012	8.7396	8.9985
8.68326	6.59867	6.3794	6.29598		6.28099	6.29866	6.29866		6.29092	6.39691	6.39691		7.39253	7.39253	7.16804		8.91896	8.95861	8.90564		10.2825	10.3378	9.72733		11.1214	11.2754	11.3653		10.9775	10.5347	10.6716		10.5821	10.7573	10.7573		8.86428	8.73373	8.99142
8.69046	6.62702	6.40901	6.32514		6.30985	6.32863	6.32863		6.31977	6.42824	6.42824		7.42764	7.42764	7.20239		8.9566	8.99419	8.94273		10.3104	10.368	9.75322		11.1482	11.3017	11.3905		10.9855	10.543	10.6818		10.5831	10.7594	10.7594		8.8584	8.7279	8.98418
8.69766	6.65582	6.43879	6.35474		6.33852	6.35915	6.35915		6.34828	6.45989	6.45989		7.46295	7.46295	7.23738		8.99511	9.03059	8.97976		10.3383	10.3986	9.77964		11.1754	11.3277	11.4158		10.9939	10.5512	10.6921		10.5838	10.7613	10.7613		8.85252	8.72211	8.97698
8.70486	6.6852	6.4687	6.38476		6.36723	6.39017	6.39017		6.37662	6.49181	6.49181		7.49847	7.49847	7.27291		9.03442	9.06789	9.01677		10.3661	10.4291	9.80672		11.2026	11.3532	11.4411		11.0029	10.5593	10.7025		10.5841	10.7628	10.7628		8.84659	8.71633	8.96998
8.71206	6.71524	6.49875	6.41521		6.3962	6.4216	6.4216		6.40505	6.52388	6.52388		7.53426	7.53426	7.3088		9.07436	9.10603	9.05377		10.394	10.4593	9.83446		11.2295	11.3779	11.4664		11.0126	10.5675	10.7128		10.584	10.7636	10.7636		8.84052	8.71056	8.96328
8.71926	6.74597	6.52894	6.44608		6.4257	6.45339	6.45339		6.43381	6.55597	6.55597		7.57032	7.57032	7.34488		9.11469	9.14482	9.09074		10.4218	10.489	9.86283		11.2559	11.4018	11.4918		11.0228	10.5756	10.7229		10.5835	10.7636	10.7636		8.83423	8.70474	8.95687
8.72646	6.77726	6.55931	6.47732		6.45589	6.48551	6.48551		6.46314	6.58803	6.58803		7.60661	7.60661	7.38096		9.1552	9.18399	9.12774		10.4496	10.518	9.89165		11.2813	11.425	11.5172		11.0333	10.5836	10.7326		10.5827	10.7629	10.7629		8.82767	8.69878	8.95069
8.73366	6.80897	6.58994	6.50886		6.4869	6.51795	6.51795		6.49313	6.62006	6.62006		7.64306	7.64306	7.41684		9.19576	9.22321	9.16484		10.4772	10.5462	9.92069		11.3058	11.4475	11.5423		11.0439	10.5914	10.7419		10.5817	10.7616	10.7616		8.82075	8.6926	8.94457
8.74086	6.84088	6.6209	6.5406		6.51873	6.55066	6.55066		6.5238	6.65207	6.65207		7.67965	7.67965	7.4524		9.23623	9.26222	9.20216		10.5044	10.5739	9.94971		11.3293	11.4698	11.5671		11.0544	10.599	10.7507		10.5807	10.7601	10.7601		8.81342	8.6862	8.93836
8.74806	6.87286	6.65217	6.57243		6.55126	6.58365	6.58365		6.55506	6.68406	6.68406		7.71638	7.71638	7.48757		9.27654	9.30089	9.23975		10.5311	10.6011	9.97844		11.3519	11.4923	11.5915		11.0647	10.6065	10.759		10.5798	10.7586	10.7586		8.80568	8.67958	8.93195
8.75526	6.90475	6.68375	6.60431		6.58433	6.61693	6.61693		6.58672	6.71614	6.71614		7.75321	7.75321	7.5223		9.31661	9.33931	9.27756		10.5573	10.6282	10.0066		11.3739	11.5151	11.6154		11.0746	10.6139	10.767		10.5793	10.7572	10.7572		8.79765	8.6728	8.9253
8.76246	6.93646	6.71562	6.63623		6.61782	6.65052	6.65052		6.61867	6.74847	6.74847		7.7901	7.7901	7.55661		9.35643	9.37762	9.31554		10.5831	10.6555	10.0341		11.3953	11.5385	11.6391		11.0838	10.6213	10.7746		10.579	10.7561	10.7561		8.78949	8.66592	8.91849
8.76966	6.96797	6.74778	6.66824		6.65165	6.68446	6.68446		6.65073	6.78127	6.78127		7.82704	7.82704	7.59055		9.39597	9.41598	9.35363		10.6088	10.6833	10.0607		11.4164	11.5627	11.6624		11.0922	10.6287	10.7822		10.5788	10.7552	10.7552		8.78141	8.65899	8.91163
8.77686	6.99933	6.7802	6.70043		6.68579	6.71874	6.71874		6.68284	6.81473	6.81473		7.86409	7.86409	7.62428		9.43521	9.45454	9.39183		10.6345	10.7118	10.0864		11.4373	11.5874	11.6856		11.0999	10.636	10.79		10.5785	10.7541	10.7541		8.77352	8.65205	8.90489
8.78406	7.03063	6.81278	6.73293		6.72024	6.75337	6.75337		6.71501	6.8489	6.8489		7.90137	7.90137	7.65804		9.47405	9.49342	9.43007		10.6606	10.7408	10.1115		11.4584	11.6127	11.7086		11.1069	10.6432	10.798		10.578	10.7527	10.7527		8.76584	8.64512	8.89841
8.79126	7.062	6.84536	6.76588		6.75501	6.78833	6.78833		6.74731	6.88378	6.88378		7.939	7.939	7.6921		9.51232	9.53266	9.46825		10.6872	10.7703	10.1362		11.4797	11.6382	11.7317		11.1134	10.6499	10.8062		10.577	10.7506	10.7506		8.75833	8.63816	8.89235
8.79846	7.09354	6.87788	6.79939		6.79013	6.82365	6.82365		6.77992	6.91935	6.91935		7.97699	7.97699	7.72677		9.5499	9.57221	9.50624		10.7143	10.8001	10.1608		11.5014	11.6634	11.7549		11.1195	10.6561	10.8145		10.5754	10.7477	10.7477		8.7509	8.63109	8.88678
8.80566	7.12534	6.91042	6.8336		6.82565	6.85933	6.85933		6.81297	6.95556	6.95556		8.01535	8.01535	7.76224		9.58672	9.6119	9.54393		10.7419	10.8298	10.1857		11.5234	11.6881	11.7782		11.1253	10.6614	10.8226		10.573	10.744	10.744		8.74346	8.62386	8.88168
8.81286	7.15744	6.94309	6.86844		6.86151	6.89539	6.89539		6.8466	6.99233	6.99233		8.05405	8.05405	7.7987		9.62288	9.65155	9.58135		10.7697	10.8593	10.2111		11.5458	11.7119	11.8018		11.131	10.6661	10.8302		10.57	10.7399	10.7399		8.73595	8.61649	8.87686
8.82006	7.18986	6.9761	6.90378		6.89761	6.93179	6.93179		6.88084	7.02951	7.02951		8.09308	8.09308	7.83616		9.65856	9.69105	9.61859		10.7974	10.8883	10.2371		11.5684	11.7348	11.8254		11.1369	10.6701	10.8375		10.5664	10.7356	10.7356		8.72834	8.60901	8.87206
8.82726	7.22261	7.00963	6.93938		6.9338	6.96852	6.96852		6.91571	7.06695	7.06695		8.13242	8.13242	7.87457		9.69403	9.7304	9.6557		10.8248	10.9168	10.2637		11.5911	11.7567	11.8492		11.1434	10.674	10.8442		10.5624	10.7315	10.7315		8.72065	8.60151	8.86698
8.83446	7.25569	7.04383	6.97501		6.96995	7.00556	7.00556		6.9512	7.10459	7.10459		8.17193	8.17193	7.91373		9.72965	9.76964	9.69273		10.8517	10.9447	10.2907		11.6138	11.778	11.8729		11.1503	10.678	10.8505		10.5583	10.728	10.728		8.71292	8.59411	8.86135
8.84166	7.28908	7.07883	7.01053		7.00605	7.04288	7.04288		6.98724	7.14239	7.14239		8.21151	8.21151	7.9533		9.76574	9.80874	9.72971		10.878	10.9721	10.3179		11.6362	11.7989	11.8963		11.1577	10.6828	10.8564		10.5542	10.7251	10.7251		8.70519	8.58694	8.85496
8.84886	7.32288	7.11473	7.0459		7.04213	7.08047	7.08047		7.02379	7.18037	7.18037		8.25104	8.25104	7.9929		9.80259	9.84771	9.76673		10.9039	10.9991	10.345		11.6584	11.82	11.9194		11.1654	10.6885	10.8622		10.5502	10.7231	10.7231		8.69748	8.58003	8.84776
8.85606	7.35726	7.15147	7.08115		7.07828	7.11831	7.11831		7.06072	7.21852	7.21852		8.29052	8.29052	8.03218		9.84035	9.88662	9.80397		10.9295	11.026	10.3716		11.6805	11.8417	11.9419		11.1734	10.6955	10.8678		10.5466	10.7219	10.7219		8.68982	8.57337	8.83969
8.86326	7.39237	7.18893	7.11641		7.11461	7.15635	7.15635		7.09792	7.2568	7.2568		8.33002	8.33002	8.07092		9.87911	9.9255	9.84153		10.9552	11.0528	10.3977		11.7024	11.8642	11.964		11.1813	10.7038	10.8735		10.5435	10.7213	10.7213		8.6822	8.56681	8.83086
8.87046	7.42835	7.22689	7.15185		7.15123	7.19454	7.19454		7.1353	7.29518	7.29518		8.3696	8.3696	8.10903		9.91876	9.96438	9.87945		10.9812	11.0799	10.4232		11.7243	11.8877	11.9856		11.1891	10.7131	10.8792		10.5411	10.7211	10.7211		8.67459	8.56019	8.82147
8.87766	7.46522	7.2651	7.18769		7.18824	7.23286	7.23286		7.17283	7.33371	7.33371		8.4093	8.4093	8.1465		9.95913	10.0032	9.91771		11.0077	11.1073	10.4482		11.7461	11.9121	12.0067		11.1965	10.7231	10.8848		10.5391	10.7209	10.7209		8.66689	8.55327	8.81181
8.88486	7.50288	7.30336	7.22412		7.22569	7.27127	7.27127		7.21049	7.37249	7.37249		8.44916	8.44916	8.18346		9.99996	10.042	9.95629		11.0348	11.135	10.473		11.7681	11.9371	12.0274		11.2032	10.7333	10.8902		10.5377	10.7205	10.7205		8.65909	8.54589	8.80221
8.89206	7.5412	7.34153	7.26122		7.26352	7.3098	7.3098		7.24822	7.41159	7.41159		8.48932	8.48932	8.22009		10.041	10.0809	9.99523		11.0625	11.1629	10.4978		11.7901	11.9623	12.0476		11.2092	10.7429	10.8951		10.5365	10.7196	10.7196		8.6512	8.53791	8.79291
8.89926	7.58002	7.3796	7.29896		7.30163	7.3485	7.3485		7.28598	7.45108	7.45108		8.52994	8.52994	8.25669		10.0821	10.1199	10.0346		11.0908	11.1909	10.5228		11.8121	11.9872	12.0677		11.2146	10.7516	10.8995		10.5354	10.7183	10.7183		8.64328	8.52928	8.78404
8.90646	7.61908	7.4176	7.3372		7.33989	7.38744	7.38744		7.32376	7.49096	7.49096		8.57117	8.57117	8.29351		10.123	10.1594	10.0744		11.1194	11.2188	10.5482		11.8342	12.0115	12.0879		11.2194	10.759	10.9035		10.5344	10.7165	10.7165		8.63538	8.52005	8.77564
8.91366	7.65812	7.45562	7.37576		7.37818	7.42667	7.42667		7.36156	7.53129	7.53129		8.61302	8.61302	8.33071		10.1637	10.1993	10.1147		11.1482	11.2464	10.5741		11.8562	12.0348	12.1083		11.2236	10.765	10.9073		10.5331	10.7144	10.7144		8.62752	8.51039	8.76765
8.92086	7.69691	7.49382	7.4145		7.41645	7.46626	7.46626		7.39945	7.57206	7.57206		8.65541	8.65541	8.36835		10.2042	10.2396	10.1552		11.177	11.2736	10.6004		11.8781	12.0569	12.129		11.2273	10.7698	10.9111		10.5316	10.7118	10.7118		8.61972	8.50054	8.76002
8.92806	7.73543	7.53235	7.45332		7.45475	7.50623	7.50623		7.43749	7.61323	7.61323		8.69821	8.69821	8.40644		10.2446	10.2804	10.1959		11.2059	11.3005	10.6272		11.8999	12.0779	12.1501		11.2305	10.7735	10.9152		10.5297	10.7088	10.7088		8.61198	8.49078	8.75261
8.93526	7.7738	7.57135	7.49224		7.49315	7.54663	7.54663		7.47574	7.6547	7.6547		8.74136	8.74136	8.44502		10.2848	10.3216	10.2366		11.2347	11.3272	10.6541		11.9214	12.0981	12.1718		11.2333	10.7764	10.9195		10.5275	10.7057	10.7057		8.60429	8.48141	8.74522
8.94246	7.81227	7.61086	7.53138		7.53182	7.58744	7.58744		7.51429	7.69634	7.69634		8.78475	8.78475	8.48412		10.3249	10.3631	10.2771		11.2634	11.3538	10.6809		11.9427	12.1176	12.1942		11.2358	10.7789	10.9243		10.5253	10.7024	10.7024		8.59655	8.4726	8.73767
8.94966	7.85105	7.65088	7.5709		7.5709	7.62865	7.62865		7.55326	7.7381	7.7381		8.82828	8.82828	8.5238		10.365	10.4046	10.3172		11.2917	11.3806	10.7073		11.9639	12.1368	12.2172		11.2381	10.7815	10.9294		10.5232	10.6989	10.6989		8.58859	8.46447	8.72983
8.95686	7.89031	7.69135	7.61098		7.61057	7.67021	7.67021		7.59279	7.77994	7.77994		8.87176	8.87176	8.56409		10.405	10.4461	10.3568		11.3194	11.4076	10.7331		11.9848	12.1562	12.2408		11.2404	10.7845	10.9349		10.5212	10.6953	10.6953		8.58035	8.45698	8.72171
8.96406	7.93015	7.73224	7.65172		7.65095	7.71212	7.71212		7.63301	7.82191	7.82191		8.91503	8.91503	8.60496		10.4448	10.4875	10.3958		11.3463	11.4349	10.7584		12.0054	12.1759	12.2646		11.2431	10.7881	10.9406		10.5194	10.6914	10.6914		8.57184	8.45001	8.71337
8.97126	7.97061	7.77355	7.69321		7.69212	7.75449	7.75449		7.67397	7.86408	7.86408		8.95808	8.95808	8.64643		10.4844	10.5288	10.4342		11.3723	11.4625	10.7832		12.0259	12.1961	12.2884		11.2464	10.7923	10.9463		10.5177	10.6874	10.6874		8.56314	8.44337	8.70491
8.97846	8.01167	7.81525	7.73541		7.73406	7.79747	7.79747		7.71563	7.90654	7.90654		9.001	9.001	8.6885		10.5239	10.5701	10.4721		11.3974	11.4901	10.8076		12.046	12.2169	12.312		11.2506	10.7971	10.9521		10.516	10.6831	10.6831		8.55436	8.43686	8.69645
8.98566	8.05321	7.85731	7.77821		7.77675	7.84116	7.84116		7.7579	7.94937	7.94937		9.044	9.044	8.73109		10.5633	10.6116	10.5097		11.4216	11.5175	10.8316		12.0658	12.238	12.3352		11.2555	10.8022	10.9579		10.5143	10.6789	10.6789		8.54563	8.43022	8.68812
8.99286	8.09505	7.89974	7.82136		7.82008	7.88562	7.88562		7.80067	7.99266	7.99266		9.08724	9.08724	8.77402		10.6027	10.6531	10.5474		11.445	11.5445	10.8555		12.0853	12.2594	12.3578		11.2611	10.8076	10.9638		10.5123	10.6747	10.6747		8.53712	8.4233	8.68002
9.00006	8.13698	7.94253	7.86461		7.86398	7.93079	7.93079		7.84381	8.03643	8.03643		9.13083	9.13083	8.81712		10.6421	10.6947	10.5853		11.468	11.5709	10.8794		12.1045	12.2808	12.3797		11.2671	10.8129	10.9696		10.5099	10.6705	10.6705		8.52902	8.416	8.6722
9.00726	8.17885	7.98567	7.90772		7.90834	7.97657	7.97657		7.88717	8.08066	8.08066		9.17484	9.17484	8.86017		10.6817	10.7363	10.6235		11.4908	11.5969	10.9034		12.1235	12.3019	12.4007		11.2732	10.8181	10.9755		10.507	10.6664	10.6664		8.52147	8.40831	8.66467
9.01446	8.22059	8.02913	7.95059		7.95307	8.0228	8.0228		7.9306	8.12528	8.12528		9.21933	9.21933	8.90307		10.7217	10.7781	10.6622		11.5138	11.6222	10.9274		12.1424	12.3229	12.4209		11.279	10.823	10.9812		10.5037	10.6625	10.6625		8.51451	8.40039	8.65737
9.02166	8.26222	8.07273	7.99323		7.99802	8.06926	8.06926		7.97395	8.17018	8.17018		9.26436	9.26436	8.94569		10.7622	10.8199	10.7013		11.5372	11.6471	10.9513		12.161	12.3434	12.4403		11.2841	10.8274	10.9866		10.5001	10.659	10.659		8.50806	8.39238	8.65023
9.02886	8.30382	8.11631	8.03576		8.04308	8.11571	8.11571		8.01715	8.21526	8.21526		9.30992	9.30992	8.98798		10.8032	10.8614	10.741		11.5612	11.6718	10.975		12.1796	12.3636	12.4592		11.2885	10.8315	10.9916		10.4962	10.6558	10.6558		8.50195	8.3845	8.64313
9.03606	8.34556	8.1597	8.07832		8.08815	8.16188	8.16188		8.06013	8.26039	8.26039		9.35589	9.35589	9.02992		10.8446	10.9026	10.781		11.5857	11.6964	10.9985		12.1983	12.3834	12.4776		11.292	10.8353	10.996		10.4921	10.653	10.653		8.49602	8.37682	8.63596
9.04326	8.38761	8.20283	8.12116		8.13319	8.20761	8.20761		8.10295	8.30545	8.30545		9.40206	9.40206	9.07162		10.8862	10.9435	10.8212		11.6106	11.7213	11.022		12.217	12.4028	12.4957		11.2949	10.8388	10.9998		10.488	10.6505	10.6505		8.49004	8.36939	8.62866
9.05046	8.43024	8.24579	8.16451		8.17815	8.25295	8.25295		8.14558	8.35033	8.35033		9.44822	9.44822	9.11324		10.928	10.9841	10.8617		11.6358	11.7465	11.0453		12.2358	12.4219	12.5137		11.2975	10.842	11.0032		10.4838	10.6483	10.6483		8.48382	8.36217	8.62121
9.05766	8.47365	8.28871	8.20864		8.22303	8.29803	8.29803		8.18809	8.395	8.395		9.49426	9.49426	9.15499		10.9696	11.0245	10.9023		11.661	11.7722	11.0686		12.2548	12.4406	12.5317		11.2999	10.8448	11.0062		10.4796	10.6462	10.6462		8.47716	8.3551	8.6137
9.06486	8.51802	8.33176	8.25374		8.26784	8.3431	8.3431		8.23056	8.43953	8.43953		9.54013	9.54013	9.19706		11.011	11.0647	10.9431		11.6862	11.7983	11.092		12.274	12.4592	12.5499		11.3025	10.8474	11.009		10.4754	10.6441	10.6441		8.47002	8.34813	8.60626
9.07206	8.56338	8.37514	8.29985		8.31268	8.38834	8.38834		8.27311	8.48408	8.48408		9.5858	9.5858	9.2396		11.0519	11.105	10.9839		11.7113	11.825	11.1157		12.2934	12.4777	12.5684		11.3051	10.8496	11.0118		10.4712	10.6419	10.6419		8.46242	8.34115	8.59904
9.07926	8.60963	8.41906	8.34688		8.35769	8.43393	8.43393		8.3159	8.52882	8.52882		9.63126	9.63126	9.28271		11.0922	11.1455	11.0249		11.7363	11.8521	11.1399		12.3129	12.4962	12.5874		11.3079	10.8515	11.0148		10.467	10.6395	10.6395		8.45444	8.33404	8.59215
9.08646	8.65661	8.46376	8.39468		8.40298	8.48002	8.48002		8.35901	8.57398	8.57398		9.67646	9.67646	9.32654		11.1321	11.1865	11.0659		11.7612	11.8796	11.1645		12.3326	12.5149	12.6067		11.311	10.8531	11.0181		10.4629	10.6366	10.6366		8.44622	8.32679	8.58563
9.09366	8.70404	8.50939	8.44309		8.44863	8.52676	8.52676		8.40245	8.61975	8.61975		9.72137	9.72137	9.37114		11.1715	11.228	11.1069		11.7858	11.9071	11.1893		12.3524	12.5341	12.6263		11.3141	10.8548	11.0218		10.459	10.6333	10.6333		8.43787	8.31946	8.5795
9.10086	8.75163	8.55594	8.49199		8.49465	8.57421	8.57421		8.44623	8.66627	8.66627		9.76605	9.76605	9.41654		11.2107	11.2699	11.1478		11.8104	11.9342	11.2144		12.3722	12.5537	12.6463		11.3174	10.8565	11.0259		10.4552	10.6294	10.6294		8.42952	8.31218	8.57369
9.10806	8.79912	8.60325	8.54121		8.54104	8.62232	8.62232		8.49033	8.71362	8.71362		9.81054	9.81054	9.46259		11.2498	11.3122	11.1888		11.8349	11.9606	11.2395		12.3918	12.5739	12.6665		11.3206	10.8586	11.0301		10.4515	10.6251	10.6251		8.42121	8.30504	8.56806
9.11526	8.84632	8.65108	8.59064		8.58781	8.67093	8.67093		8.53472	8.76176	8.76176		9.85492	9.85492	9.50906		11.2888	11.3546	11.2297		11.8594	11.986	11.2643		12.4113	12.5945	12.6868		11.3239	10.8609	11.0344		10.4477	10.6203	10.6203		8.41299	8.29811	8.56239
9.12246	8.89314	8.69925	8.64016		8.63493	8.71992	8.71992		8.57936	8.81053	8.81053		9.89929	9.89929	9.55568		11.3281	11.3969	11.2706		11.8839	12.0104	11.2887		12.4306	12.6151	12.7071		11.3271	10.8636	11.0385		10.4437	10.6153	10.6153		8.40482	8.29133	8.55642
9.12966	8.93969	8.74761	8.68976		8.68241	8.76926	8.76926		8.62421	8.85969	8.85969		9.94378	9.94378	9.60218		11.3678	11.4388	11.3116		11.9084	12.0337	11.3125		12.4495	12.6355	12.7274		11.3303	10.8664	11.0423		10.4394	10.6102	10.6102		8.39664	8.2847	8.54998
9.13686	8.98619	8.79607	8.73944		8.73026	8.81894	8.81894		8.66932	8.909	8.909		9.98853	9.98853	9.64835		11.4078	11.4803	11.3527		11.9328	12.056	11.3355		12.4682	12.6553	12.7476		11.3334	10.8692	11.0455		10.4347	10.605	10.605		8.38837	8.27814	8.54296
9.14406	9.03296	8.84458	8.78925		8.77851	8.86898	8.86898		8.71479	8.95823	8.95823		10.0337	10.0337	9.69401		11.4481	11.5213	11.3939		11.9572	12.0776	11.3578		12.4867	12.6743	12.7674		11.3362	10.8719	11.0481		10.4297	10.5997	10.5997		8.37997	8.27152	8.53539
9.15126	9.08026	8.89309	8.83918		8.82723	8.91934	8.91934		8.76077	9.00729	9.00729		10.0796	10.0796	9.739		11.4886	11.562	11.435		11.9816	12.099	11.3797		12.505	12.6921	12.7869		11.3386	10.8742	11.0502		10.4244	10.5944	10.5944		8.37144	8.26464	8.52737
9.15846	9.12826	8.9416	8.88921		8.87653	8.97002	8.97002		8.80743	9.05626	9.05626		10.1263	10.1263	9.78324		11.5292	11.6025	11.4759		12.006	12.1206	11.4013		12.523	12.7088	12.8057		11.3406	10.8759	11.0518		10.419	10.5892	10.5892		8.36287	8.25732	8.51908
9.16566	9.17709	8.99022	8.93926		8.92643	9.02103	9.02103		8.85484	9.10529	9.10529		10.1738	10.1738	9.82681		11.5698	11.643	11.5164		12.0304	12.1427	11.4227		12.5409	12.7245	12.8238		11.3421	10.8772	11.0533		10.4135	10.5841	10.5841		8.35441	8.24947	8.51073
9.17286	9.22679	9.03908	8.98926		8.97692	9.07236	9.07236		8.90298	9.15455	9.15455		10.2223	10.2223	9.86996		11.6102	11.6838	11.5563		12.0548	12.1655	11.4443		12.5586	12.7394	12.8412		11.3435	10.8782	11.0547		10.4083	10.5791	10.5791		8.3462	8.24109	8.50251
9.18006	9.27736	9.08833	9.03918		9.02792	9.12395	9.12395		8.95177	9.20423	9.20423		10.2716	10.2716	9.91302		11.6503	11.7247	11.5954		12.0791	12.1891	11.4661		12.5761	12.754	12.8577		11.3447	10.879	11.0563		10.4034	10.5743	10.5743		8.33831	8.23231	8.49466
9.18726	9.32866	9.13799	9.08903		9.07937	9.17574	9.17574		9.00109	9.2545	9.2545		10.3215	10.3215	9.95631		11.6903	11.7659	11.6338		12.1033	12.2134	11.4883		12.5933	12.7683	12.8735		11.346	10.8801	11.0582		10.3988	10.5698	10.5698		8.33078	8.22325	8.4873
9.19446	9.38048	9.18809	9.13891		9.1312	9.22773	9.22773		9.05081	9.30551	9.30551		10.3719	10.3719	10.0001		11.7302	11.8071	11.6717		12.1273	12.2383	11.5107		12.61	12.7824	12.8888		11.3476	10.8816	11.0606		10.3945	10.5655	10.5655		8.32363	8.21413	8.48047
9.20166	9.43264	9.23863	9.189		9.18339	9.28	9.28		9.10078	9.35732	9.35732		10.4226	10.4226	10.0444		11.7703	11.8483	11.7091		12.151	12.2636	11.5331		12.6262	12.7966	12.9038		11.3497	10.8838	11.0633		10.3905	10.5615	10.5615		8.31686	8.20522	8.47411
9.20886	9.4851	9.28973	9.23954		9.23596	9.33264	9.33264		9.15086	9.4099	9.4099		10.4732	10.4732	10.0895		11.8106	11.8891	11.7463		12.1744	12.2891	11.5555		12.6416	12.8107	12.9189		11.3522	10.8867	11.0663		10.3868	10.5578	10.5578		8.31039	8.19677	8.4681
9.21606	9.53791	9.34152	9.29078		9.28892	9.38575	9.38575		9.20094	9.46304	9.46304		10.5238	10.5238	10.1352		11.8513	11.9295	11.7837		12.1973	12.3145	11.5777		12.6563	12.8248	12.9342		11.3552	10.8903	11.0693		10.3832	10.554	10.554		8.30407	8.18895	8.46231
9.22326	9.59118	9.39412	9.34296		9.34232	9.43946	9.43946		9.25101	9.51652	9.51652		10.574	10.574	10.1814		11.8923	11.9695	11.8215		12.2197	12.3395	11.5996		12.6704	12.8385	12.9501		11.3584	10.8944	11.0724		10.3798	10.55	10.55		8.29774	8.18183	8.4566
9.23046	9.64497	9.44759	9.39621		9.3962	9.49389	9.49389		9.30111	9.57017	9.57017		10.6239	10.6239	10.2281		11.9336	12.0092	11.8599		12.2415	12.364	11.6211		12.6839	12.852	12.9666		11.3617	10.8989	11.0753		10.3764	10.5456	10.5456		8.2913	8.17535	8.45085
9.23766	9.69927	9.50193	9.45058		9.45057	9.54919	9.54919		9.35133	9.62389	9.62389		10.6735	10.6735	10.2748		11.9749	12.0487	11.8991		12.2628	12.3879	11.6424		12.6972	12.8653	12.9837		11.3646	10.9035	11.0782		10.3729	10.5408	10.5408		8.28477	8.16942	8.44502
9.24486	9.75405	9.55712	9.50608		9.50541	9.60534	9.60534		9.40172	9.67763	9.67763		10.7227	10.7227	10.3215		12.0162	12.088	11.9393		12.2838	12.4114	11.6634		12.7104	12.8786	13.0014		11.367	10.9078	11.0809		10.3694	10.5354	10.5354		8.27821	8.16389	8.43902
9.25206	9.80923	9.61311	9.56261		9.56061	9.6622	9.6622		9.45232	9.73135	9.73135		10.7715	10.7715	10.3681		12.0571	12.1273	11.9802		12.3046	12.4342	11.6844		12.7237	12.8923	13.0195		11.3688	10.9117	11.0835		10.3656	10.5296	10.5296		8.27165	8.15862	8.43285
9.25926	9.86466	9.66979	9.61998		9.61602	9.71955	9.71955		9.50316	9.78504	9.78504		10.8201	10.8201	10.4145		12.0977	12.1666	12.0218		12.3254	12.4568	11.7054		12.7375	12.9064	13.038		11.3698	10.9148	11.0858		10.3616	10.5236	10.5236		8.26509	8.15337	8.42645
9.26646	9.92019	9.72695	9.67796		9.67155	9.77721	9.77721		9.55427	9.8388	9.8388		10.8685	10.8685	10.4608		12.1377	12.206	12.0638		12.3464	12.4792	11.7268		12.7519	12.9212	13.0563		11.3701	10.9172	11.088		10.3574	10.5175	10.5175		8.2585	8.14799	8.41984
9.27366	9.97562	9.78433	9.73632		9.72719	9.83508	9.83508		9.60565	9.89276	9.89276		10.9168	10.9168	10.5072		12.1773	12.2456	12.106		12.3677	12.5016	11.7485		12.7667	12.9366	13.0744		11.3698	10.9187	11.0901		10.353	10.5116	10.5116		8.25187	8.14242	8.41301
9.28086	10.0308	9.84167	9.79492		9.78306	9.8931	9.8931		9.65728	9.94703	9.94703		10.9651	10.9651	10.5537		12.2164	12.2855	12.1482		12.3895	12.5244	11.7705		12.7819	12.9528	13.0921		11.3691	10.9194	11.0918		10.3486	10.5062	10.5062		8.24523	8.1367	8.40601
9.28806	10.0858	9.89882	9.85364		9.8393	9.95119	9.95119		9.70908	10.0016	10.0016		11.0134	11.0134	10.6002		12.2554	12.3259	12.1899		12.412	12.5476	11.7929		12.7974	12.9697	13.1091		11.3685	10.9194	11.0931		10.3442	10.5013	10.5013		8.23857	8.13084	8.3989
9.29526	10.1407	9.95572	9.91243		9.89602	10.0093	10.0093		9.76098	10.0566	10.0566		11.0619	11.0619	10.6467		12.2944	12.3668	12.231		12.4351	12.5713	11.8155		12.8128	12.987	13.1256		11.3681	10.9186	11.0939		10.3398	10.4969	10.4969		8.23194	8.1249	8.39174
9.30246	10.1958	10.0124	9.97116		9.95334	10.0676	10.0676		9.81297	10.1117	10.1117		11.1106	11.1106	10.6933		12.3335	12.4084	12.2713		12.4586	12.5953	11.8382		12.8281	13.0044	13.1415		11.3685	10.9174	11.0943		10.3357	10.4927	10.4927		8.22537	8.11889	8.38462
9.30966	10.2515	10.0692	10.0298		10.0113	10.1261	10.1261		9.86505	10.1671	10.1671		11.1594	11.1594	10.7399		12.3729	12.4508	12.3107		12.4822	12.6196	11.8607		12.8432	13.0217	13.157		11.3699	10.9159	11.0944		10.3317	10.4886	10.4886		8.21894	8.11286	8.37762
9.31686	10.3081	10.1262	10.0884		10.07	10.1849	10.1849		9.91732	10.2227	10.2227		11.2083	11.2083	10.7866		12.4127	12.4938	12.3493		12.5059	12.644	11.8831		12.8582	13.0389	13.1721		11.3724	10.9142	11.0944		10.3278	10.4844	10.4844		8.21276	8.10686	8.37083
9.32406	10.366	10.1836	10.1471		10.1293	10.244	10.244		9.96986	10.2786	10.2786		11.2574	11.2574	10.8333		12.4532	12.5374	12.3876		12.5293	12.6684	11.9052		12.8732	13.056	13.187		11.3758	10.9126	11.0944		10.3238	10.4799	10.4799		8.20689	8.1009	8.36431
9.33126	10.4253	10.2417	10.206		10.1892	10.3035	10.3035		10.0228	10.3349	10.3349		11.3067	11.3067	10.8801		12.4942	12.5812	12.4258		12.5523	12.6927	11.9271		12.8884	13.0729	13.2021		11.3802	10.9112	11.0945		10.3197	10.475	10.475		8.20135	8.09492	8.35807
9.33846	10.486	10.3006	10.2654		10.2496	10.3633	10.3633		10.0765	10.3918	10.3918		11.3563	11.3563	10.9272		12.5357	12.6249	12.4644		12.5749	12.7166	11.949		12.9039	13.0897	13.2172		11.3852	10.9103	11.0948		10.3153	10.4697	10.4697		8.1961	8.08892	8.35207
9.34566	10.5481	10.3601	10.3252		10.3103	10.4236	10.4236		10.1309	10.4496	10.4496		11.4064	11.4064	10.9746		12.5774	12.6682	12.5036		12.5967	12.7401	11.9708		12.9196	13.1064	13.2325		11.3907	10.9099	11.0953		10.3107	10.464	10.464		8.191	8.08292	8.3462
9.35286	10.6112	10.4205	10.3856		10.3715	10.4844	10.4844		10.1864	10.5083	10.5083		11.457	11.457	11.0225		12.6191	12.7108	12.5435		12.6179	12.7632	11.9927		12.9357	13.123	13.2477		11.3961	10.9102	11.0961		10.306	10.458	10.458		8.18591	8.07703	8.34038
9.36006	10.6752	10.4815	10.4467		10.4333	10.5459	10.5459		10.2429	10.5682	10.5682		11.5084	11.5084	11.071		12.6606	12.7525	12.5841		12.6384	12.786	12.0147		12.9518	13.1395	13.2627		11.4012	10.9112	11.097		10.301	10.4522	10.4522		8.18073	8.07129	8.33451
9.36726	10.7396	10.543	10.5085		10.4957	10.6079	10.6079		10.3003	10.6291	10.6291		11.5607	11.5607	11.1199		12.7018	12.7935	12.6251		12.6586	12.8085	12.0367		12.9678	13.1557	13.2773		11.4056	10.913	11.0982		10.2959	10.4465	10.4465		8.17543	8.06568	8.32851
9.37446	10.8042	10.605	10.5711		10.559	10.6704	10.6704		10.3583	10.6908	10.6908		11.6138	11.6138	11.1694		12.7425	12.8339	12.6662		12.6787	12.8306	12.0584		12.9836	13.1718	13.2913		11.4091	10.9155	11.0995		10.2908	10.4413	10.4413		8.17001	8.0602	8.32233
9.38166	10.8686	10.6673	10.6343		10.6229	10.7336	10.7336		10.4168	10.7531	10.7531		11.6675	11.6675	11.2194		12.7826	12.8739	12.7069		12.6988	12.8521	12.0797		12.9988	13.1876	13.3047		11.4116	10.9186	11.1009		10.2859	10.4364	10.4364		8.16449	8.05485	8.31593
9.38886	10.9327	10.7302	10.6982		10.6876	10.7973	10.7973		10.4756	10.8156	10.8156		11.7218	11.7218	11.2699		12.8224	12.9138	12.747		12.7191	12.8728	12.1003		13.0135	13.203	13.3176		11.4131	10.9223	11.1026		10.2809	10.4318	10.4318		8.15891	8.0496	8.30933
9.39606	10.9968	10.7936	10.7627		10.7526	10.8613	10.8613		10.5344	10.878	10.878		11.7763	11.7763	11.321		12.8621	12.9539	12.7861		12.7396	12.8929	12.1201		13.0275	13.218	13.3302		11.4134	10.9263	11.1044		10.2759	10.4277	10.4277		8.1533	8.0444	8.30259
9.40326	11.0608	10.8576	10.8278		10.8179	10.9254	10.9254		10.593	10.9402	10.9402		11.8307	11.8307	11.3723		12.902	12.9943	12.8245		12.7604	12.9123	12.1393		13.0412	13.2327	13.3428		11.4128	10.9306	11.1064		10.2708	10.4238	10.4238		8.14773	8.0391	8.2958
9.41046	11.1247	10.9221	10.8937		10.8832	10.9896	10.9896		10.6513	11.0018	11.0018		11.8848	11.8848	11.4237		12.9423	13.035	12.8624		12.7816	12.9311	12.1578		13.0546	13.247	13.3554		11.4112	10.9348	11.1084		10.2657	10.4204	10.4204		8.14222	8.03358	8.28906
9.41766	11.1885	10.987	10.9603		10.9483	11.0538	11.0538		10.7094	11.0631	11.0631		11.9385	11.9385	11.475		12.983	13.076	12.9001		12.8031	12.9496	12.1758		13.068	13.2611	13.3685		11.4091	10.9387	11.1103		10.2605	10.4171	10.4171		8.13672	8.02774	8.28251
9.42486	11.2522	11.0521	11.0274		11.0134	11.1181	11.1181		10.7674	11.1241	11.1241		11.9917	11.9917	11.5258		13.0241	13.1171	12.9382		12.8248	12.968	12.1936		13.0815	13.2751	13.382		11.4067	10.942	11.112		10.2554	10.414	10.414		8.13115	8.02159	8.27627
9.43206	11.3156	11.1174	11.0948		11.0784	11.1824	11.1824		10.8255	11.1849	11.1849		12.0443	12.0443	11.5761		13.0653	13.1583	12.977		12.8465	12.9867	12.2113		13.0953	13.289	13.396		11.4044	10.9446	11.1135		10.2503	10.4111	10.4111		8.12545	8.01509	8.27047
9.43926	11.3789	11.1826	11.1624		11.1434	11.2471	11.2471		10.8839	11.2459	11.2459		12.0966	12.0966	11.6257		13.1067	13.1995	13.0169		12.8682	13.0061	12.2292		13.1093	13.3028	13.4104		11.4026	10.9464	11.1146		10.2453	10.4082	10.4082		8.11963	8.0083	8.26519
9.44646	11.4421	11.2479	11.2298		11.2084	11.3124	11.3124		10.943	11.3071	11.3071		12.1488	12.1488	11.6747		13.1478	13.2406	13.0577		12.8899	13.0262	12.2473		13.1234	13.3168	13.425		11.4013	10.9473	11.1154		10.2404	10.4053	10.4053		8.11378	8.00125	8.26041
9.45366	11.5052	11.3133	11.2967		11.2736	11.3785	11.3785		11.0027	11.3685	11.3685		12.2011	12.2011	11.7229		13.1885	13.2818	13.0994		12.9116	13.0472	12.2655		13.1377	13.3308	13.4396		11.4007	10.9474	11.1159		10.2357	10.4024	10.4024		8.10801	7.99406	8.25607
9.46086	11.5685	11.3787	11.3631		11.3389	11.4455	11.4455		11.0633	11.4303	11.4303		12.2536	12.2536	11.7708		13.2285	13.3233	13.1415		12.9332	13.069	12.284		13.152	13.3448	13.454		11.4008	10.947	11.1163		10.2313	10.3991	10.3991		8.10241	7.98688	8.25208
9.46806	11.6322	11.4445	11.4288		11.4042	11.5134	11.5134		11.1246	11.4924	11.4924		12.3066	12.3066	11.8185		13.268	13.365	13.1837		12.9548	13.0915	12.3027		13.1661	13.3588	13.468		11.4014	10.9462	11.1167		10.2273	10.3955	10.3955		8.09707	7.97987	8.24834
9.47526	11.6968	11.5107	11.4939		11.4695	11.582	11.582		11.1865	11.5548	11.5548		12.36	12.36	11.8664		13.3072	13.4071	13.2258		12.9761	13.1145	12.3217		13.1797	13.3726	13.4816		11.4023	10.9455	11.1172		10.2237	10.3915	10.3915		8.09208	7.97315	8.24468
9.48246	11.7624	11.5775	11.5587		11.5345	11.6511	11.6511		11.2489	11.6174	11.6174		12.4141	12.4141	11.9148		13.3463	13.4494	13.2675		12.997	13.1379	12.3409		13.1928	13.386	13.4947		11.4034	10.9451	11.1178		10.2206	10.3872	10.3872		8.08754	7.96683	8.24093
9.48966	11.8293	11.6449	11.6236		11.5993	11.7202	11.7202		11.3113	11.6801	11.6801		12.4688	12.4688	11.9638		13.3857	13.4917	13.3086		13.0176	13.1618	12.3603		13.2055	13.3992	13.5071		11.4046	10.9452	11.1185		10.2179	10.3828	10.3828		8.08347	7.96097	8.23695
9.49686	11.8972	11.7127	11.6888		11.6638	11.7891	11.7891		11.3735	11.7429	11.7429		12.5239	12.5239	12.0134		13.4255	13.5341	13.3492		13.0379	13.1859	12.3801		13.2178	13.4121	13.519		11.4058	10.9459	11.1193		10.2156	10.3783	10.3783		8.07985	7.95562	8.23264
9.50406	11.9659	11.7809	11.7546		11.7281	11.8573	11.8573		11.4356	11.8057	11.8057		12.5792	12.5792	12.0638		13.4658	13.5762	13.3894		13.058	13.2102	12.4004		13.2298	13.4252	13.5305		11.4072	10.9471	11.1203		10.2135	10.374	10.374		8.07649	7.95079	8.228
9.51126	12.035	11.8493	11.8209		11.7923	11.9248	11.9248		11.4973	11.8689	11.8689		12.6345	12.6345	12.1147		13.5067	13.618	13.4295		13.0779	13.2345	12.4213		13.2415	13.4383	13.5417		11.4088	10.9486	11.1216		10.2117	10.3702	10.3702		8.07323	7.94649	8.22313
9.51846	12.1042	11.9178	11.8877		11.8567	11.9913	11.9913		11.5589	11.9323	11.9323		12.6896	12.6896	12.1661		13.5483	13.6593	13.4695		13.0976	13.2586	12.4427		13.2529	13.4517	13.5527		11.4109	10.9503	11.123		10.2097	10.3669	10.3669		8.06987	7.94265	8.2181
9.52566	12.173	11.9862	11.9547		11.9213	12.0571	12.0571		11.6206	11.9961	11.9961		12.7441	12.7441	12.2177		13.5902	13.7002	13.5093		13.1174	13.2824	12.4646		13.2641	13.4655	13.5637		11.4134	10.952	11.1247		10.2073	10.3644	10.3644		8.06623	7.93923	8.21304
9.53286	12.2409	12.0542	12.0214		11.9863	12.1221	12.1221		11.6824	12.0601	12.0601		12.798	12.798	12.269		13.6324	13.7408	13.5488		13.1375	13.3055	12.4869		13.2753	13.4798	13.5748		11.4165	10.9535	11.1267		10.2044	10.3625	10.3625		8.0622	7.93614	8.20804
9.54006	12.3078	12.1216	12.0878		12.0517	12.1866	12.1866		11.7444	12.1245	12.1245		12.8511	12.8511	12.32		13.6746	13.7812	13.5877		13.1581	13.3278	12.5094		13.2866	13.4943	13.5864		11.4198	10.9548	11.129		10.2011	10.3611	10.3611		8.05776	7.93329	8.20323
9.54726	12.3736	12.1885	12.1534		12.1175	12.2508	12.2508		11.8068	12.1891	12.1891		12.9035	12.9035	12.3705		13.7167	13.8217	13.626		13.1794	13.3491	12.532		13.2982	13.5088	13.5985		11.4231	10.9559	11.1316		10.1975	10.36	10.36		8.05295	7.93061	8.19872
9.55446	12.4383	12.2545	12.2181		12.1837	12.3148	12.3148		11.8693	12.2538	12.2538		12.9554	12.9554	12.4204		13.7584	13.8624	13.6635		13.2013	13.3696	12.5544		13.3102	13.523	13.6112		11.4261	10.957	11.1344		10.1937	10.3591	10.3591		8.04795	7.928	8.19458
9.56166	12.5022	12.3196	12.2818		12.2501	12.3787	12.3787		11.9317	12.3183	12.3183		13.007	13.007	12.4698		13.7996	13.9032	13.7003		13.2238	13.3893	12.5765		13.3226	13.5368	13.6246		11.4286	10.9583	11.1373		10.1899	10.3583	10.3583		8.043	7.92532	8.19082
9.56886	12.5653	12.3835	12.3447		12.3166	12.4425	12.4425		11.9936	12.3824	12.3824		13.0583	13.0583	12.5186		13.8401	13.944	13.7363		13.2468	13.4086	12.5978		13.3357	13.55	13.6386		11.4304	10.9601	11.14		10.1861	10.3572	10.3572		8.03837	7.92246	8.18743
9.57606	12.6278	12.4463	12.4067		12.3828	12.5062	12.5062		12.0549	12.4457	12.4457		13.1094	13.1094	12.5671		13.8796	13.9849	13.7721		13.2703	13.4279	12.6184		13.3495	13.5629	13.6532		11.4316	10.9626	11.1424		10.1825	10.3557	10.3557		8.03427	7.91933	8.18439
9.58326	12.6899	12.5081	12.4682		12.4483	12.5696	12.5696		12.1155	12.5079	12.5079		13.1604	13.1604	12.6153		13.9179	14.0257	13.808		13.2941	13.4473	12.6382		13.3639	13.5754	13.6683		11.4322	10.9657	11.1442		10.1791	10.3537	10.3537		8.03081	7.9159	8.18163
9.59046	12.7515	12.5688	12.5291		12.513	12.6328	12.6328		12.1753	12.5689	12.5689		13.2111	13.2111	12.6635		13.9547	14.0661	13.8444		13.318	13.4671	12.6572		13.3785	13.5878	13.6835		11.4324	10.9692	11.1456		10.1759	10.3512	10.3512		8.02793	7.91219	8.17907
9.59766	12.8129	12.6289	12.5897		12.5766	12.6957	12.6957		12.2346	12.6286	12.6286		13.2615	13.2615	12.7116		13.99	14.1061	13.8817		13.3417	13.4874	12.6757		13.393	13.6003	13.6989		11.4326	10.9729	11.1466		10.1728	10.3483	10.3483		8.02549	7.90823	8.17669
9.60486	12.8739	12.6884	12.65		12.6389	12.7581	12.7581		12.2936	12.6871	12.6871		13.3114	13.3114	12.7596		14.024	14.1453	13.92		13.3652	13.5079	12.6937		13.407	13.6132	13.7143		11.4332	10.9767	11.1472		10.1698	10.3449	10.3449		8.02325	7.90406	8.17439
9.61206	12.9346	12.7477	12.7103		12.6999	12.8198	12.8198		12.3525	12.7445	12.7445		13.3609	13.3609	12.8074		14.0572	14.1838	13.9592		13.3882	13.5285	12.7115		13.4203	13.6264	13.7295		11.4343	10.9803	11.1478		10.1668	10.341	10.341		8.02099	7.89976	8.17214
9.61926	12.9948	12.8071	12.7705		12.7596	12.8809	12.8809		12.4113	12.801	12.801		13.4098	13.4098	12.855		14.0899	14.2217	13.9989		13.4106	13.5492	12.7292		13.4326	13.6399	13.7444		11.4362	10.9836	11.1485		10.1638	10.3367	10.3367		8.01856	7.89549	8.16986
9.62646	13.0544	12.8667	12.8305		12.8182	12.9411	12.9411		12.4702	12.8569	12.8569		13.4584	13.4584	12.9021		14.1227	14.2591	14.0388		13.4324	13.5699	12.7468		13.444	13.6532	13.7588		11.4388	10.9864	11.1498		10.1611	10.3323	10.3323		8.01586	7.89142	8.16752
9.63366	13.1134	12.9266	12.8904		12.8758	13.0004	13.0004		12.529	12.9127	12.9127		13.5068	13.5068	12.9487		14.156	14.296	14.0784		13.4533	13.5903	12.7644		13.4546	13.6661	13.7727		11.442	10.9888	11.1518		10.1587	10.3277	10.3277		8.01291	7.88772	8.16506
9.64086	13.1717	12.9867	12.95		12.9329	13.0588	13.0588		12.5876	12.9685	12.9685		13.5552	13.5552	12.9948		14.1903	14.3323	14.1171		13.4732	13.6105	12.782		13.4646	13.6783	13.786		11.4456	10.9907	11.1545		10.1565	10.3232	10.3232		8.00978	7.88444	8.16244
9.64806	13.2293	13.0469	13.0089		12.9894	13.1163	13.1163		12.6457	13.0246	13.0246		13.6036	13.6036	13.0403		14.2256	14.3682	14.1546		13.4922	13.6304	12.7998		13.4743	13.6896	13.7988		11.4494	10.9926	11.1578		10.1545	10.319	10.319		8.00659	7.88158	8.15966
9.65526	13.2861	13.1068	13.0669		13.0454	13.1731	13.1731		12.703	13.081	13.081		13.6522	13.6522	13.0854		14.262	14.4035	14.1908		13.5102	13.6502	12.8176		13.484	13.7	13.8112		11.4532	10.9945	11.1614		10.1525	10.3153	10.3153		8.00346	7.87913	8.15669
9.66246	13.3419	13.1661	13.1236		13.101	13.2295	13.2295		12.7595	13.1373	13.1373		13.7008	13.7008	13.1299		14.2991	14.4383	14.2257		13.5275	13.6698	12.8354		13.494	13.7095	13.8232		11.4567	10.9965	11.1652		10.1505	10.3121	10.3121		8.00042	7.87706	8.15349
9.66966	13.397	13.2245	13.1789		13.1559	13.2855	13.2855		12.8151	13.1936	13.1936		13.7494	13.7494	13.1741		14.3364	14.4724	14.2594		13.5444	13.6891	12.8534		13.5042	13.7184	13.8349		11.4597	10.9987	11.1688		10.1483	10.3096	10.3096		7.99748	7.87535	8.15001
9.67686	13.4513	13.2815	13.2326		13.2101	13.3412	13.3412		12.8697	13.2494	13.2494		13.7977	13.7977	13.2177		14.3734	14.5058	14.2924		13.5612	13.7082	12.8716		13.5147	13.727	13.8464		11.4625	11.001	11.1722		10.1459	10.3078	10.3078		7.99459	7.87393	8.14627
9.68406	13.5051	13.3371	13.285		13.2636	13.3966	13.3966		12.9235	13.3047	13.3047		13.8454	13.8454	13.2609		14.4097	14.5383	14.3248		13.5781	13.7266	12.89		13.5251	13.7356	13.8576		11.4651	11.0036	11.1752		10.1432	10.3066	10.3066		7.99165	7.87272	8.14233
9.69126	13.5583	13.3911	13.3362		13.3163	13.4514	13.4514		12.9766	13.3593	13.3593		13.8923	13.8923	13.3035		14.4447	14.57	14.357		13.5952	13.7444	12.9085		13.5354	13.7444	13.8688		11.4677	11.0064	11.1778		10.1403	10.3057	10.3057		7.98861	7.87165	8.13832
9.69846	13.6109	13.4436	13.3864		13.3681	13.5056	13.5056		13.029	13.413	13.413		13.938	13.938	13.3456		14.4784	14.6009	14.389		13.6126	13.7614	12.9271		13.5454	13.7534	13.8798		11.4706	11.0093	11.1802		10.1374	10.3051	10.3051		7.98551	7.87069	8.13437
9.70566	13.6628	13.4946	13.4359		13.4192	13.5587	13.5587		13.0807	13.4658	13.4658		13.9824	13.9824	13.3872		14.5105	14.6311	14.4208		13.6301	13.7778	12.9453		13.555	13.7628	13.8907		11.474	11.0121	11.1823		10.1347	10.3046	10.3046		7.98241	7.86983	8.13066
9.71286	13.714	13.5442	13.4847		13.4696	13.6107	13.6107		13.1319	13.5176	13.5176		14.0256	14.0256	13.4283		14.541	14.6608	14.4524		13.6475	13.7936	12.9631		13.5643	13.7723	13.9011		11.4779	11.0148	11.1844		10.1323	10.304	10.304		7.97949	7.86906	8.12728
9.72006	13.7643	13.5925	13.5329		13.5195	13.6614	13.6614		13.1823	13.5683	13.5683		14.0675	14.0675	13.4688		14.5702	14.6899	14.4837		13.6647	13.8089	12.9799		13.5734	13.7818	13.9108		11.4822	11.0173	11.1863		10.1304	10.3031	10.3031		7.97685	7.86834	8.12432
9.72726	13.8136	13.6397	13.5803		13.5689	13.711	13.711		13.2318	13.6178	13.6178		14.1083	14.1083	13.5087		14.5981	14.7186	14.5144		13.6812	13.8236	12.9956		13.5826	13.7909	13.9197		11.4869	11.0194	11.188		10.1292	10.3019	10.3019		7.97461	7.86757	8.12178
9.73446	13.8618	13.6859	13.6265		13.6175	13.7597	13.7597		13.2802	13.666	13.666		14.1479	14.1479	13.5479		14.625	14.7468	14.5446		13.6969	13.838	13.0099		13.5923	13.7994	13.9278		11.4916	11.0211	11.1895		10.1284	10.3004	10.3004		7.9728	7.86664	8.11963
9.74166	13.9087	13.7312	13.6714		13.6654	13.8075	13.8075		13.3275	13.713	13.713		14.1867	14.1867	13.5865		14.6511	14.7747	14.574		13.7119	13.8522	13.0229		13.6026	13.8074	13.9351		11.4961	11.0225	11.1907		10.1282	10.2986	10.2986		7.9714	7.86541	8.11776
9.74886	13.9544	13.7756	13.7146		13.7124	13.8545	13.8545		13.3737	13.7587	13.7587		14.2247	14.2247	13.6243		14.6765	14.8023	14.6028		13.7262	13.8663	13.0348		13.6135	13.8149	13.9415		11.5001	11.0236	11.1917		10.1282	10.2965	10.2965		7.97035	7.86383	8.11602
9.75606	13.9991	13.8191	13.7562		13.7583	13.9005	13.9005		13.4187	13.8031	13.8031		14.2621	14.2621	13.6612		14.7013	14.8296	14.631		13.7404	13.8801	13.0459		13.6247	13.822	13.9471		11.5034	11.0245	11.1923		10.1283	10.2941	10.2941		7.9695	7.86187	8.11428
9.76326	14.0427	13.8619	13.7961		13.8031	13.9456	13.9456		13.4626	13.8466	13.8466		14.2991	14.2991	13.6972		14.7256	14.8563	14.6586		13.7546	13.8936	13.0568		13.636	13.8287	13.9521		11.5057	11.0251	11.1927		10.1284	10.2916	10.2916		7.96868	7.85963	8.11244
9.77046	14.0855	13.9041	13.8346		13.8466	13.9895	13.9895		13.5054	13.8893	13.8893		14.3358	14.3358	13.7322		14.7494	14.8823	14.6856		13.769	13.9066	13.0679		13.6467	13.8352	13.9567		11.5072	11.0257	11.193		10.1282	10.2888	10.2888		7.96768	7.8572	8.11052
9.77766	14.1275	13.9457	13.8723		13.8889	14.032	14.032		13.5473	13.9317	13.9317		14.3725	14.3725	13.7663		14.7727	14.9073	14.7117		13.7837	13.919	13.0795		13.6565	13.8415	13.9613		11.5077	11.0262	11.1935		10.1275	10.2857	10.2857		7.96638	7.85472	8.10863
9.78486	14.1689	13.9869	13.9095		13.9303	14.0731	14.0731		13.5884	13.9736	13.9736		14.409	14.409	13.7997		14.7955	14.931	14.737		13.7986	13.9311	13.0918		13.6649	13.8474	13.9662		11.5074	11.0268	11.1942		10.1264	10.2823	10.2823		7.96468	7.8523	8.10689
9.79206	14.2098	14.0277	13.9469		13.971	14.1128	14.1128		13.6288	14.0152	14.0152		14.4454	14.4454	13.8323		14.8178	14.9533	14.7613		13.8137	13.9428	13.1045		13.6717	13.853	13.9713		11.5065	11.0275	11.1952		10.1248	10.2787	10.2787		7.96257	7.85009	8.10539
9.79926	14.2503	14.068	13.9847		14.0112	14.1513	14.1513		13.6685	14.0563	14.0563		14.4816	14.4816	13.8643		14.8399	14.9743	14.7846		13.8287	13.9543	13.1174		13.6767	13.8582	13.9767		11.5052	11.0284	11.1965		10.1226	10.2749	10.2749		7.96012	7.84822	8.10418
9.80646	14.2903	14.1077	14.023		14.051	14.1892	14.1892		13.7075	14.0965	14.0965		14.5175	14.5175	13.8956		14.8617	14.994	14.807		13.8433	13.9655	13.1298		13.6804	13.8626	13.9825		11.5035	11.0294	11.1979		10.12	10.2708	10.2708		7.95739	7.8468	8.10323
9.81366	14.3296	14.1466	14.0623		14.0904	14.2271	14.2271		13.7458	14.1356	14.1356		14.5528	14.5528	13.9263		14.8834	15.0128	14.8286		13.8572	13.9765	13.1415		13.6831	13.8663	13.9885		11.5016	11.0306	11.1992		10.1171	10.2664	10.2664		7.95457	7.8458	8.10251
9.82086	14.3683	14.1847	14.1023		14.1296	14.2651	14.2651		13.7836	14.1735	14.1735		14.5872	14.5872	13.9566		14.9048	15.0314	14.8496		13.87	13.9873	13.152		13.6853	13.8693	13.9946		11.4996	11.0319	11.2002		10.1139	10.262	10.262		7.95187	7.84509	8.10192
9.82806	14.4065	14.2219	14.1429		14.1686	14.3036	14.3036		13.8207	14.21	14.21		14.6204	14.6204	13.9864		14.9261	15.0505	14.87		13.8817	13.998	13.1614		13.6873	13.8717	14.0007		11.4976	11.0335	11.2005		10.1105	10.2575	10.2575		7.94953	7.84451	8.10127
9.83526	14.4441	14.2583	14.1839		14.2074	14.3423	14.3423		13.8573	14.2452	14.2452		14.6522	14.6522	14.0157		14.9474	15.0706	14.8901		13.8923	14.0084	13.1698		13.6894	13.8738	14.0063		11.4954	11.0352	11.2		10.1068	10.2532	10.2532		7.94776	7.84392	8.10037
9.84246	14.4813	14.2939	14.2249		14.2459	14.3811	14.3811		13.8934	14.2794	14.2794		14.6825	14.6825	14.0446		14.9688	15.0918	14.9098		13.9019	14.0185	13.1776		13.6917	13.8757	14.0112		11.4931	11.0368	11.1985		10.1031	10.2492	10.2492		7.94666	7.8433	8.09913
9.84966	14.5181	14.329	14.2657		14.2841	14.4196	14.4196		13.9289	14.3128	14.3128		14.7115	14.7115	14.0732		14.99	15.1141	14.9291		13.9105	14.0282	13.1852		13.6942	13.8776	14.0152		11.4908	11.038	11.196		10.0992	10.2456	10.2456		7.9462	7.84258	8.09752
9.85686	14.5545	14.3636	14.3062		14.3221	14.4576	14.4576		13.964	14.3458	14.3458		14.7392	14.7392	14.1016		15.0112	15.1369	14.9481		13.9183	14.0373	13.193		13.6968	13.8795	14.0182		11.4885	11.0388	11.1927		10.0952	10.2426	10.2426		7.94628	7.84171	8.09556
9.86406	14.5908	14.3983	14.3463		14.3602	14.4947	14.4947		13.9985	14.3787	14.3787		14.7659	14.7659	14.1299		15.0322	15.1598	14.9666		13.9255	14.0458	13.2013		13.6994	13.8815	14.0202		11.4862	11.0389	11.1887		10.0912	10.2399	10.2399		7.94668	7.84062	8.09332
9.87126	14.627	14.4333	14.3863		14.3985	14.5309	14.5309		14.0324	14.4116	14.4116		14.7922	14.7922	14.1581		15.053	15.1823	14.9845		13.9324	14.0536	13.2101		13.7017	13.8836	14.0213		11.4838	11.0383	11.1843		10.087	10.2376	10.2376		7.94717	7.83935	8.09083
9.87846	14.6632	14.4687	14.4263		14.437	14.5662	14.5662		14.0658	14.4446	14.4446		14.8184	14.8184	14.186		15.0735	15.2038	15.0019		13.9394	14.0606	13.2193		13.7034	13.8857	14.0215		11.4815	11.0371	11.1798		10.0826	10.2354	10.2354		7.94749	7.83796	8.08815
9.88566	14.6995	14.5046	14.4662		14.4758	14.6013	14.6013		14.0987	14.4778	14.4778		14.8449	14.8449	14.2136		15.0935	15.2238	15.019		13.9464	14.0669	13.2285		13.7046	13.8876	14.0212		11.4791	11.0353	11.1754		10.0779	10.2331	10.2331		7.94736	7.83658	8.08528
9.89286	14.7357	14.5412	14.5062		14.5148	14.6367	14.6367		14.1314	14.5113	14.5113		14.8718	14.8718	14.2407		15.113	15.2425	15.036		13.9534	14.0724	13.2374		13.7053	13.8892	14.0204		11.4767	11.0333	11.1714		10.0729	10.2303	10.2303		7.94662	7.83522	8.08221
9.90006	14.7719	14.5784	14.5463		14.554	14.6729	14.6729		14.1638	14.5452	14.5452		14.8992	14.8992	14.2674		15.1317	15.26	15.0529		13.9606	14.0774	13.2456		13.7056	13.8903	14.0194		11.4742	11.0313	11.1676		10.0678	10.2269	10.2269		7.9452	7.83381	8.07892
9.90726	14.8082	14.6162	14.5864		14.5933	14.7106	14.7106		14.1961	14.5796	14.5796		14.9269	14.9269	14.2935		15.1494	15.277	15.07		13.9676	14.0821	13.2529		13.7055	13.8907	14.0184		11.4718	11.0297	11.1644		10.0624	10.2227	10.2227		7.94315	7.83231	8.07542
9.91446	14.8449	14.6547	14.6267		14.6326	14.7499	14.7499		14.2285	14.6149	14.6149		14.9547	14.9547	14.3189		15.1661	15.2939	15.0871		13.9746	14.0864	13.2594		13.7051	13.8904	14.0172		11.4694	11.0287	11.1615		10.057	10.2178	10.2178		7.94061	7.83072	8.0717
9.92166	14.8822	14.6939	14.6672		14.672	14.7912	14.7912		14.2614	14.6511	14.6511		14.9825	14.9825	14.3438		15.1821	15.3111	15.1044		13.9813	14.0905	13.2651		13.7045	13.8894	14.0159		11.467	11.0285	11.1589		10.0516	10.2125	10.2125		7.93776	7.82908	8.06781
9.92886	14.9205	14.7339	14.7083		14.7116	14.8343	14.8343		14.295	14.6884	14.6884		15.0104	15.0104	14.3684		15.1978	15.3288	15.1217		13.9876	14.0946	13.27		13.7037	13.8879	14.0143		11.4646	11.0289	11.1565		10.0465	10.207	10.207		7.93473	7.82746	8.06378
9.93606	14.9602	14.7747	14.7502		14.7517	14.8793	14.8793		14.3293	14.7267	14.7267		15.0383	15.0383	14.393		15.2135	15.3471	15.139		13.9935	14.0988	13.2742		13.703	13.886	14.0124		11.4623	11.0296	11.1542		10.0417	10.2016	10.2016		7.93169	7.82585	8.05966
9.94326	15.0015	14.8166	14.7934		14.7928	14.9257	14.9257		14.3645	14.7658	14.7658		15.0665	15.0665	14.4179		15.2296	15.366	15.1561		13.9989	14.1031	13.2779		13.7025	13.8839	14.0103		11.4601	11.0303	11.1518		10.0373	10.1967	10.1967		7.92872	7.82423	8.05554
9.95046	15.0446	14.86	14.8383		14.8354	14.9732	14.9732		14.4006	14.8056	14.8056		15.0951	15.0951	14.4435		15.2467	15.3854	15.1728		14.004	14.1077	13.2811		13.7022	13.8819	14.0078		11.458	11.0307	11.1492		10.0334	10.1925	10.1925		7.92587	7.82264	8.05151
9.95766	15.0898	14.9051	14.8854		14.8801	15.0216	15.0216		14.4377	14.8457	14.8457		15.1246	15.1246	14.47		15.2652	15.4052	15.1894		14.0086	14.1127	13.2838		13.702	13.8803	14.0052		11.456	11.0304	11.1463		10.0297	10.1887	10.1887		7.92315	7.82116	8.04758
9.96486	15.1371	14.9523	14.9349		14.9271	15.0711	15.0711		14.4757	14.8863	14.8863		15.1553	15.1553	14.4978		15.2855	15.4254	15.2059		14.013	14.1181	13.2863		13.702	13.8792	14.0024		11.4541	11.0292	11.1432		10.0261	10.1854	10.1854		7.92048	7.81981	8.04372
9.97206	15.1863	15.0019	14.9871		14.9766	15.1216	15.1216		14.5147	14.9274	14.9274		15.1872	15.1872	14.5271		15.3077	15.446	15.2226		14.0169	14.1243	13.2884		13.702	13.8787	13.9998		11.452	11.0268	11.1399		10.0225	10.1821	10.1821		7.9178	7.81852	8.03988
9.97926	15.2375	15.0542	15.0418		15.0288	15.1736	15.1736		14.5543	14.9693	14.9693		15.2202	15.2202	14.5582		15.3317	15.4673	15.2396		14.0204	14.1314	13.2904		13.7021	13.8787	13.9975		11.4499	11.0234	11.1367		10.0189	10.1786	10.1786		7.91507	7.81711	8.03607
9.98646	15.2907	15.1094	15.0991		15.0836	15.2275	15.2275		14.5946	15.0124	15.0124		15.254	15.254	14.5909		15.3573	15.4896	15.2572		14.0236	14.1395	13.2926		13.7022	13.879	13.9957		11.4477	11.0191	11.1337		10.0152	10.1745	10.1745		7.91221	7.81542	8.03229
9.99366	15.346	15.1677	15.1588		15.1408	15.2838	15.2838		14.6357	15.0572	15.0572		15.2886	15.2886	14.6255		15.3844	15.5132	15.2754		14.0266	14.1484	13.295		13.7025	13.8794	13.9945		11.4455	11.0142	11.1312		10.0117	10.1697	10.1697		7.90926	7.81335	8.02861
10.0009	15.4036	15.229	15.221		15.2002	15.343	15.343		14.6776	15.1042	15.1042		15.3239	15.3239	14.6619		15.4127	15.5382	15.2946		14.0294	14.158	13.2981		13.7032	13.8798	13.9938		11.4434	11.0093	11.1292		10.0083	10.164	10.164		7.90627	7.81088	8.02506
10.0081	15.4636	15.2933	15.2857		15.2614	15.4055	15.4055		14.7208	15.1538	15.1538		15.36	15.36	14.6999		15.4421	15.5648	15.315		14.0323	14.168	13.3019		13.7042	13.8802	13.994		11.4412	11.0045	11.1279		10.0051	10.1578	10.1578		7.90331	7.808	8.02171
10.0153	15.5262	15.3606	15.3532		15.3242	15.4715	15.4715		14.7656	15.206	15.206		15.397	15.397	14.7395		15.4726	15.593	15.3368		14.0353	14.1778	13.3066		13.7058	13.8807	13.995		11.4389	11.0001	11.127		10.0022	10.1512	10.1512		7.90045	7.80475	8.0186
10.0225	15.592	15.4309	15.4237		15.3887	15.5408	15.5408		14.8123	15.2611	15.2611		15.4353	15.4353	14.7803		15.504	15.6226	15.3605		14.0388	14.1871	13.3122		13.7081	13.8815	13.9969		11.4367	10.9963	11.1265		9.99961	10.1447	10.1447		7.8977	7.80118	8.01572
10.0297	15.6612	15.5042	15.4972		15.4553	15.6136	15.6136		14.8614	15.319	15.319		15.4753	15.4753	14.8221		15.5364	15.6538	15.3863		14.0429	14.1955	13.3186		13.7111	13.883	13.9999		11.4345	10.9933	11.1261		9.99727	10.1387	10.1387		7.89508	7.79743	8.01299
10.0369	15.7343	15.5807	15.5743		15.5245	15.6896	15.6896		14.9134	15.3799	15.3799		15.5177	15.5177	14.8648		15.57	15.6862	15.4145		14.0478	14.2027	13.3255		13.7149	13.8855	14.0039		11.4324	10.9909	11.1255		9.99493	10.1335	10.1335		7.89252	7.79366	8.01024
10.0441	15.8115	15.6604	15.6554		15.597	15.7689	15.7689		14.9683	15.4439	15.4439		15.5634	15.5634	14.9084		15.6049	15.7198	15.4454		14.0537	14.2089	13.333		13.7193	13.8892	14.0089		11.4303	10.9892	11.1245		9.9924	10.1292	10.1292		7.89	7.79002	8.00729
10.0513	15.8931	15.7436	15.741		15.6733	15.8516	15.8516		15.0263	15.5111	15.5111		15.6126	15.6126	14.9532		15.6412	15.7543	15.4791		14.0609	14.2147	13.3411		13.7242	13.8944	14.0146		11.4282	10.9882	11.123		9.9897	10.1258	10.1258		7.88742	7.78655	8.00393
10.0585	15.9794	15.8306	15.8316		15.7541	15.9378	15.9378		15.0876	15.5819	15.5819		15.6655	15.6655	14.9996		15.6792	15.7896	15.5153		14.0697	14.2204	13.3498		13.7296	13.9009	14.021		11.4263	10.9879	11.1212		9.98694	10.1232	10.1232		7.88475	7.7832	8.00003
10.0657	16.0704	15.9215	15.9276		15.8398	16.0279	16.0279		15.1523	15.6565	15.6565		15.7223	15.7223	15.0481		15.719	15.8258	15.5539		14.08	14.2268	13.3591		13.7355	13.9089	14.0279		11.4246	10.9884	11.1194		9.98432	10.1213	10.1213		7.88203	7.7799	7.99556
10.0729	16.1663	16.0168	16.0292		15.9309	16.1224	16.1224		15.2206	15.7353	15.7353		15.7827	15.7827	15.0991		15.7608	15.8632	15.5945		14.0921	14.2345	13.369		13.7418	13.918	14.035		11.4235	10.9898	11.1177		9.98197	10.1198	10.1198		7.87935	7.77661	7.99063
10.0801	16.2672	16.1169	16.1366		16.0275	16.2217	16.2217		15.2927	15.8186	15.8186		15.8465	15.8465	15.1529		15.8048	15.9022	15.6369		14.1059	14.2439	13.3798		13.7488	13.9279	14.0424		11.4232	10.9921	11.1165		9.97998	10.1186	10.1186		7.87677	7.77333	7.9855
10.0873	16.3731	16.2222	16.2499		16.1297	16.3261	16.3261		15.3688	15.9064	15.9064		15.9135	15.9135	15.2099		15.8514	15.9431	15.681		14.1213	14.2555	13.3917		13.7563	13.9385	14.0501		11.4237	10.9953	11.116		9.97847	10.1176	10.1176		7.87439	7.77007	7.98047
10.0945	16.4838	16.3332	16.3692		16.2373	16.4359	16.4359		15.4492	15.9988	15.9988		15.983	15.983	15.2701		15.9007	15.9866	15.7265		14.1382	14.2693	13.4049		13.7644	13.9497	14.0585		11.4251	10.9994	11.1163		9.97753	10.1166	10.1166		7.8722	7.76685	7.97588
10.1017	16.5995	16.4502	16.4943		16.3504	16.551	16.551		15.5339	16.0957	16.0957		16.0549	16.0549	15.3335		15.9528	16.0332	15.7738		14.1562	14.2853	13.4195		13.7733	13.9614	14.0679		11.4276	11.004	11.1177		9.97715	10.1158	10.1158		7.87017	7.76367	7.972
10.1089	16.7203	16.5736	16.6247		16.4689	16.6716	16.6716		15.623	16.1968	16.1968		16.1289	16.1289	15.4		16.0076	16.0836	15.823		14.1752	14.3034	13.4356		13.7829	13.9737	14.0788		11.4309	11.0088	11.1199		9.97713	10.1152	10.1152		7.86821	7.76055	7.96902
10.1161	16.8465	16.7033	16.7603		16.593	16.7975	16.7975		15.7164	16.3023	16.3023		16.205	16.205	15.4692		16.0652	16.1379	15.8749		14.1951	14.3233	13.4534		13.7932	13.9867	14.0914		11.4353	11.0135	11.1228		9.97721	10.1148	10.1148		7.86619	7.75759	7.96701
10.1233	16.9785	16.8396	16.9008		16.7224	16.9288	16.9288		15.8141	16.412	16.412		16.2836	16.2836	15.5412		16.1254	16.1963	15.9299		14.216	14.3447	13.4727		13.8043	14.0004	14.106		11.4403	11.0179	11.1265		9.97722	10.1148	10.1148		7.86394	7.75491	7.9659
10.1305	17.1165	16.9822	17.0463		16.8571	17.0658	17.0658		15.9159	16.5261	16.5261		16.3647	16.3647	15.6158		16.188	16.2587	15.9885		14.238	14.3674	13.4937		13.8162	14.0149	14.1226		11.446	11.0218	11.1308		9.97716	10.1151	10.1151		7.86133	7.75257	7.96545
10.1377	17.2607	17.131	17.197		16.9969	17.2085	17.2085		16.0219	16.6445	16.6445		16.4486	16.4486	15.6934		16.253	16.3247	16.0507		14.2611	14.3912	13.5161		13.8291	14.0304	14.1411		11.4522	11.0253	11.1359		9.97714	10.1157	10.1157		7.85838	7.75062	7.96537
10.1449	17.4114	17.2857	17.353		17.1417	17.3572	17.3572		16.1319	16.7673	16.7673		16.5359	16.5359	15.7742		16.3201	16.394	16.1166		14.2855	14.4161	13.5399		13.8433	14.047	14.1613		11.4588	11.0288	11.1417		9.97733	10.1167	10.1167		7.85524	7.74902	7.96538
10.1521	17.5689	17.4464	17.5146		17.2914	17.5119	17.5119		16.2463	16.8948	16.8948		16.6271	16.6271	15.8585		16.3896	16.4662	16.1863		14.3113	14.4423	13.5647		13.8589	14.0647	14.1829		11.4659	11.0324	11.1485		9.97792	10.1182	10.1182		7.85215	7.74776	7.96527
10.1593	17.7332	17.6131	17.6821		17.4459	17.6729	17.6729		16.3652	17.0271	17.0271		16.7226	16.7226	15.9466		16.4615	16.541	16.2596		14.3386	14.47	13.5905		13.8764	14.0835	14.2055		11.4736	11.0364	11.1562		9.97919	10.1203	10.1203		7.84937	7.74684	7.96494
10.1665	17.9044	17.7861	17.8561		17.605	17.8401	17.8401		16.489	17.1646	17.1646		16.8228	16.8228	16.0388		16.5361	16.6184	16.3358		14.3674	14.4995	13.6174		13.8958	14.1035	14.229		11.4819	11.0413	11.1651		9.98144	10.1231	10.1231		7.84712	7.74621	7.96434
10.1737	18.0825	17.9656	18.0368		17.769	18.0135	18.0135		16.6178	17.3073	17.3073		16.9279	16.9279	16.1352		16.6135	16.6982	16.4146		14.3977	14.5313	13.6454		13.9175	14.1246	14.2535		11.4909	11.0474	11.1752		9.98492	10.1268	10.1268		7.84554	7.7458	7.96348
10.1809	18.2674	18.1517	18.2242		17.9381	18.1932	18.1932		16.7519	17.4554	17.4554		17.0382	17.0382	16.2361		16.694	16.7807	16.4955		14.4296	14.5656	13.6748		13.9415	14.147	14.279		11.5007	11.055	11.1862		9.98974	10.1315	10.1315		7.84472	7.74552	7.96246
10.1881	18.4589	18.3444	18.4181		18.1127	18.3789	18.3789		16.8914	17.609	17.609		17.1537	17.1537	16.3415		16.7776	16.866	16.5784		14.4634	14.6027	13.7059		13.9677	14.1707	14.3057		11.5113	11.0641	11.198		9.99585	10.1373	10.1373		7.84464	7.74524	7.96142
10.1953	18.6569	18.5439	18.6183		18.2933	18.5705	18.5705		17.037	17.7685	17.7685		17.2747	17.2747	16.4513		16.8645	16.9544	16.6633		14.4992	14.6427	13.7388		13.9959	14.1957	14.3339		11.523	11.0747	11.2104		10.0031	10.1444	10.1444		7.84517	7.74493	7.96053
10.2025	18.8613	18.7503	18.8245		18.4804	18.768	18.768		17.1888	17.9342	17.9342		17.4011	17.4011	16.5654		16.9549	17.0458	16.7505		14.5376	14.6856	13.7736		14.0259	14.2219	14.3636		11.5357	11.0867	11.223		10.0111	10.1525	10.1525		7.84606	7.74458	7.95984
10.2097	19.0718	18.9633	19.0363		18.6743	18.9713	18.9713		17.347	18.1062	18.1062		17.5326	17.5326	16.6836		17.0486	17.1403	16.8403		14.5786	14.7312	13.8105		14.0574	14.2496	14.395		11.5494	11.1	11.2356		10.0199	10.1617	10.1617		7.84702	7.7442	7.95937
10.2169	19.2884	19.1828	19.2537		18.8751	19.1805	19.1805		17.5118	18.2847	18.2847		17.669	17.669	16.8058		17.1458	17.2378	16.9332		14.6227	14.7792	13.8493		14.0901	14.2787	14.4278		11.5642	11.1146	11.2481		10.0289	10.1717	10.1717		7.84776	7.74382	7.95909
10.2241	19.5112	19.4084	19.4765		19.0825	19.3955	19.3955		17.683	18.4695	18.4695		17.8098	17.8098	16.9317		17.2467	17.3382	17.03		14.6697	14.8292	13.8898		14.124	14.3093	14.4621		11.5801	11.1302	11.2606		10.0381	10.1824	10.1824		7.84807	7.74346	7.95896
10.2313	19.7405	19.6401	19.705		19.2964	19.6163	19.6163		17.8607	18.6607	18.6607		17.9548	17.9548	17.0613		17.3515	17.4414	17.131		14.7198	14.881	13.9319		14.1589	14.3416	14.4977		11.5972	11.1468	11.2737		10.0472	10.1936	10.1936		7.84791	7.74315	7.95903
10.2385	19.9767	19.878	19.9392		19.5164	19.8427	19.8427		18.0448	18.8581	18.8581		18.1037	18.1037	17.1942		17.4602	17.5472	17.2367		14.7728	14.934	13.9752		14.1949	14.3756	14.5344		11.6154	11.1642	11.2876		10.0562	10.205	10.205		7.84736	7.74295	7.95935
10.2457	20.2205	20.1222	20.1794		19.7422	20.0748	20.0748		18.2348	19.0617	19.0617		18.2562	18.2562	17.33		17.5727	17.6554	17.347		14.8282	14.9882	14.0198		14.232	14.4114	14.5719		11.6346	11.1823	11.3028		10.065	10.2166	10.2166		7.84661	7.74293	7.96002
10.2529	20.472	20.3727	20.4258		19.9732	20.3124	20.3124		18.4304	19.2713	19.2713		18.4118	18.4118	17.4685		17.6887	17.7659	17.4617		14.8858	15.0435	14.0657		14.2703	14.449	14.6103		11.6546	11.2012	11.3196		10.0739	10.2283	10.2283		7.84594	7.74314	7.96115
10.2601	20.7313	20.6295	20.6785		20.209	20.5554	20.5554		18.6311	19.4867	19.4867		18.5704	18.5704	17.6094		17.8082	17.8788	17.5803		14.9453	15.0999	14.1129		14.31	14.4884	14.6496		11.6754	11.2209	11.338		10.083	10.2401	10.2401		7.84569	7.74365	7.9629
10.2673	20.9982	20.8923	20.9374		20.4495	20.8035	20.8035		18.837	19.7076	19.7076		18.7316	18.7316	17.7531		17.9309	17.9943	17.7022		15.0064	15.1573	14.1615		14.3509	14.5298	14.6899		11.697	11.2415	11.3582		10.0926	10.2522	10.2522		7.84619	7.74455	7.96547
10.2745	21.2721	21.1611	21.2022		20.6944	21.0565	21.0565		19.0479	19.934	19.934		18.8956	18.8956	17.8997		18.0565	18.1125	17.8267		15.069	15.216	14.2115		14.3931	14.573	14.7315		11.7196	11.263	11.3799		10.1028	10.2648	10.2648		7.84776	7.74592	7.96896
10.2817	21.5522	21.4356	21.4725		20.9439	21.3141	21.3141		19.264	20.1655	20.1655		19.0622	19.0622	18.0495		18.1845	18.2338	17.9533		15.133	15.2762	14.2631		14.4363	14.6182	14.7743		11.7432	11.2856	11.4028		10.1138	10.2778	10.2778		7.85058	7.74786	7.97336
10.2889	21.8376	21.7156	21.7481		21.1977	21.5761	21.5761		19.4852	20.4018	20.4018		19.2314	19.2314	18.2026		18.3145	18.3585	18.0817		15.1983	15.3381	14.3162		14.4805	14.6653	14.8186		11.7679	11.3094	11.4265		10.1256	10.2916	10.2916		7.8546	7.75045	7.97854
10.2961	22.1272	22.0006	22.0286		21.4555	21.8424	21.8424		19.7115	20.6422	20.6422		19.4033	19.4033	18.3593		18.4461	18.4869	18.212		15.265	15.4018	14.3709		14.5253	14.7142	14.8645		11.7941	11.3343	11.4509		10.1384	10.3064	10.3064		7.85971	7.75376	7.98429
10.3033	22.4203	22.2898	22.3137		21.7169	22.1129	22.1129		19.9428	20.8861	20.8861		19.5781	19.5781	18.5196		18.5793	18.6192	18.3445		15.3332	15.4673	14.4272		14.5706	14.7647	14.9121		11.8218	11.3604	11.4758		10.1522	10.3221	10.3221		7.86567	7.75774	7.99039
10.3105	22.7163	22.5829	22.6027		21.9816	22.3871	22.3871		20.179	21.1326	21.1326		19.7558	19.7558	18.6834		18.714	18.7553	18.4794		15.4031	15.5347	14.4851		14.6163	14.8167	14.9613		11.851	11.3876	11.5012		10.167	10.3388	10.3388		7.8722	7.76228	7.99662
10.3177	23.0151	22.8794	22.8951		22.2495	22.6649	22.6649		20.4198	21.3812	21.3812		19.9365	19.9365	18.8507		18.8501	18.8952	18.6172		15.4749	15.6042	14.5447		14.6626	14.8698	15.012		11.8819	11.4158	11.5272		10.1828	10.3563	10.3563		7.8791	7.76724	8.00278
10.3249	23.3166	23.1789	23.1904		22.5205	22.9461	22.9461		20.6647	21.6316	21.6316		20.1204	20.1204	19.021		18.9875	19.0384	18.7581		15.5488	15.676	14.6059		14.7095	14.9237	15.0638		11.9142	11.4452	11.5539		10.1996	10.3744	10.3744		7.88618	7.77247	8.00878
10.3321	23.6209	23.481	23.4877		22.7945	23.2305	23.2305		20.9135	21.8834	21.8834		20.3072	20.3072	19.1937		19.1262	19.1844	18.9024		15.6248	15.7501	14.6687		14.7572	14.9782	15.1165		11.9478	11.4757	11.5813		10.2172	10.393	10.393		7.89335	7.7779	8.01461
10.3393	23.9281	23.7852	23.7865		23.071	23.5178	23.5178		21.1655	22.1369	22.1369		20.4968	20.4968	19.3683		19.2662	19.3324	19.0499		15.7029	15.8263	14.7331		14.8059	15.0327	15.1697		11.9822	11.5073	11.6096		10.2357	10.412	10.412		7.90058	7.78353	8.0204
10.3465	24.2378	24.0913	24.086		23.3498	23.8079	23.8079		21.4205	22.3924	22.3924		20.689	20.689	19.5446		19.4077	19.4816	19.2002		15.7828	15.9045	14.7988		14.8559	15.0871	15.2232		12.0174	11.5401	11.6387		10.2547	10.4311	10.4311		7.90793	7.78947	8.02629
10.3537	24.5502	24.3991	24.3856		23.6308	24.1001	24.1001		21.678	22.6505	22.6505		20.8835	20.8835	19.7222		19.5506	19.6313	19.3529		15.8642	15.9843	14.8656		14.9074	15.1414	15.2767		12.0529	11.574	11.6686		10.274	10.4503	10.4503		7.91541	7.7959	8.03241
10.3609	24.8649	24.7084	24.6847		23.9137	24.3941	24.3941		21.9378	22.9116	22.9116		21.0798	21.0798	19.901		19.6949	19.781	19.5071		15.9469	16.0654	14.9333		14.9604	15.1958	15.33		12.0887	11.6089	11.6992		10.2935	10.4694	10.4694		7.92302	7.80295	8.03881
10.3681	25.1817	25.0192	24.9831		24.1983	24.6891	24.6891		22.1996	23.176	23.176		21.2776	21.2776	20.0808		19.8401	19.9301	19.6624		16.0304	16.1472	15.0016		15.0147	15.2506	15.3832		12.1247	11.6446	11.7304		10.3131	10.4886	10.4886		7.93074	7.81075	8.04548
10.3753	25.5002	25.3313	25.2811		24.4839	24.9845	24.9845		22.463	23.4434	23.4434		21.4764	21.4764	20.2617		19.9861	20.0785	19.8179		16.1144	16.2295	15.0703		15.0701	15.306	15.4366		12.1607	11.6809	11.7622		10.3326	10.5077	10.5077		7.93853	7.8193	8.05237
10.3825	25.8201	25.6446	25.5786		24.7698	25.2796	25.2796		22.7277	23.7134	23.7134		21.6759	21.6759	20.4436		20.1326	20.2258	19.9731		16.1988	16.3117	15.1397		15.1261	15.3622	15.4902		12.1968	11.7172	11.7946		10.3521	10.5269	10.5269		7.94635	7.82852	8.05938
10.3897	26.1415	25.9588	25.8756		25.0555	25.5737	25.5737		22.9934	23.985	23.985		21.8757	21.8757	20.6264		20.2792	20.3721	20.1276		16.2833	16.3937	15.2098		15.1825	15.4193	15.5444		12.233	11.7532	11.8275		10.3716	10.5461	10.5461		7.95412	7.83817	8.06637
10.3969	26.4644	26.2735	26.1723		25.3403	25.8661	25.8661		23.2597	24.2572	24.2572		22.0757	22.0757	20.8101		20.4256	20.5175	20.2812		16.3679	16.4754	15.2809		15.2386	15.4773	15.599		12.2694	11.7884	11.8607		10.3913	10.5653	10.5653		7.9618	7.84798	8.07319
10.4041	26.7886	26.5884	26.4686		25.6239	26.1565	26.1565		23.5265	24.5289	24.5289		22.2756	22.2756	20.9946		20.5714	20.6621	20.4338		16.4526	16.557	15.353		15.2942	15.5358	15.654		12.306	11.8227	11.894		10.4115	10.5846	10.5846		7.96935	7.85765	8.07971
10.4113	27.1139	26.9029	26.7643		25.9061	26.4447	26.4447		23.7938	24.7987	24.7987		22.4754	22.4754	21.1794		20.7166	20.8056	20.5852		16.5375	16.6385	15.426		15.3491	15.5945	15.7095		12.3428	11.856	11.9272		10.432	10.6038	10.6038		7.97681	7.86695	8.08589
10.4185	27.4399	27.2165	27.0593		26.1866	26.7306	26.7306		24.0613	25.066	25.066		22.675	22.675	21.3642		20.8612	20.948	20.7354		16.6224	16.7202	15.4997		15.4034	15.6525	15.7653		12.3798	11.8887	11.9602		10.4529	10.6232	10.6232		7.98423	7.87578	8.09179
10.4257	27.766	27.5284	27.353		26.4654	27.0141	27.0141		24.3287	25.3304	25.3304		22.8743	22.8743	21.5482		21.0049	21.089	20.8844		16.7071	16.8021	15.5737		15.4574	15.7093	15.821		12.4169	11.921	11.9929		10.474	10.6427	10.6427		7.99168	7.88417	8.09749
10.4329	28.0912	27.8379	27.6446		26.742	27.2952	27.2952		24.5957	25.5919	25.5919		23.0734	23.0734	21.7308		21.1478	21.2282	21.0321		16.7915	16.8845	15.6476		15.5112	15.7642	15.8763		12.4538	11.9535	12.0251		10.4948	10.6623	10.6623		7.99918	7.89232	8.1031
10.4401	28.4141	28.1445	27.9335		27.0163	27.5737	27.5737		24.8621	25.8506	25.8506		23.2718	23.2718	21.9111		21.2896	21.3656	21.1786		16.8754	16.9674	15.7209		15.5649	15.8172	15.9309		12.4905	11.9868	12.0569		10.5152	10.682	10.682		8.00679	7.90042	8.10874
10.4473	28.7334	28.4476	28.2188		27.2881	27.8491	27.8491		25.1274	26.1066	26.1066		23.4688	23.4688	22.0886		21.4299	21.5006	21.3234		16.9587	17.0503	15.7934		15.6186	15.8682	15.9843		12.5267	12.0213	12.0884		10.5349	10.7017	10.7017		8.01458	7.90871	8.11451
10.4545	29.0477	28.7465	28.5		27.5574	28.1209	28.1209		25.3913	26.3598	26.3598		23.6636	23.6636	22.2629		21.5683	21.633	21.4663		17.0415	17.1329	15.8647		15.6721	15.9174	16.0364		12.5625	12.0572	12.1196		10.5538	10.7212	10.7212		8.02272	7.9173	8.12053
10.4617	29.356	29.0405	28.7768		27.8237	28.3882	28.3882		25.6529	26.61	26.61		23.8553	23.8553	22.4336		21.7039	21.7626	21.6066		17.1235	17.2146	15.9347		15.7251	15.965	16.0869		12.5978	12.0943	12.1508		10.5719	10.7405	10.7405		8.03136	7.92624	8.1269
10.4689	29.6575	29.3286	29.049		28.0865	28.6505	28.6505		25.9116	26.8567	26.8567		24.0431	24.0431	22.6004		21.836	21.8894	21.744		17.2049	17.295	16.0034		15.7772	16.0113	16.1358		12.6324	12.1324	12.1819		10.5894	10.7593	10.7593		8.04061	7.93549	8.13365
10.4761	29.952	29.6103	29.3163		28.3448	28.907	28.907		26.1668	27.0991	27.0991		24.2263	24.2263	22.7634		21.964	22.0136	21.8781		17.2854	17.3733	16.071		15.8277	16.0566	16.1829		12.6665	12.1706	12.2129		10.6067	10.7776	10.7776		8.05044	7.94494	8.14075
10.4833	30.2391	29.885	29.5784		28.598	29.1572	29.1572		26.4179	27.3365	27.3365		24.4045	24.4045	22.923		22.0873	22.1351	22.0083		17.3652	17.4489	16.1374		15.8762	16.101	16.2281		12.7	12.2083	12.2434		10.6241	10.7952	10.7952		8.06079	7.95438	8.14806
10.4905	30.5188	30.1523	29.835		28.8454	29.4007	29.4007		26.6646	27.5678	27.5678		24.5774	24.5774	23.0796		22.2056	22.2542	22.1344		17.4438	17.5215	16.2027		15.9224	16.1445	16.2715		12.7328	12.2447	12.2734		10.6417	10.8122	10.8122		8.07148	7.96361	8.15541
10.4977	30.7912	30.4115	30.0858		29.0866	29.637	29.637		26.9065	27.7922	27.7922		24.7451	24.7451	23.2335		22.3189	22.3708	22.2559		17.5211	17.591	16.2665		15.966	16.1869	16.313		12.7649	12.2793	12.3027		10.6597	10.8287	10.8287		8.0823	7.97251	8.16259
10.5049	31.0564	30.6622	30.3303		29.321	29.8662	29.8662		27.1432	28.0092	28.0092		24.9079	24.9079	23.3848		22.4273	22.4849	22.3729		17.5964	17.6575	16.3287		16.0072	16.2277	16.3525		12.796	12.312	12.3313		10.6779	10.8446	10.8446		8.09293	7.98105	8.16943
10.5121	31.3145	30.9043	30.5676		29.5477	30.0883	30.0883		27.374	28.2185	28.2185		25.0662	25.0662	23.533		22.5311	22.5962	22.4855		17.6694	17.7212	16.389		16.0461	16.2667	16.3899		12.8259	12.3425	12.359		10.696	10.8599	10.8599		8.10304	7.98933	8.17574
10.5193	31.5652	31.1377	30.7965		29.7663	30.3031	30.3031		27.5985	28.4202	28.4202		25.2202	25.2202	23.6778		22.6307	22.7045	22.5942		17.7394	17.7824	16.4472		16.0828	16.3033	16.4251		12.8542	12.3711	12.3857		10.7136	10.8746	10.8746		8.11225	7.99744	8.18137
10.5265	31.8078	31.3628	31.016		29.9767	30.5102	30.5102		27.8162	28.6142	28.6142		25.3699	25.3699	23.8185		22.7266	22.8092	22.6991		17.8061	17.8414	16.5032		16.1174	16.3374	16.4579		12.8809	12.3981	12.4113		10.7304	10.8885	10.8885		8.12033	8.00548	8.18623
10.5337	32.0416	31.5794	31.2251		30.1791	30.7092	30.7092		28.0266	28.8006	28.8006		25.515	25.515	23.9547		22.819	22.9097	22.8001		17.8691	17.8986	16.5569		16.1501	16.3687	16.4884		12.9061	12.424	12.4355		10.7458	10.9014	10.9014		8.12716	8.01345	8.19036
10.5409	32.2659	31.7874	31.4237		30.3734	30.8993	30.8993		28.2293	28.9794	28.9794		25.6548	25.6548	24.0856		22.908	23.0055	22.8973		17.9282	17.954	16.608		16.1808	16.3971	16.5163		12.9297	12.4492	12.4584		10.7596	10.913	10.913		8.1328	8.02133	8.19384
10.5481	32.4803	31.9865	31.6118		30.5593	31.08	31.08		28.4237	29.1505	29.1505		25.7887	25.7887	24.2105		22.9936	23.0961	22.9901		17.9832	18.0078	16.6565		16.2095	16.4225	16.5415		12.9518	12.4742	12.4798		10.7717	10.923	10.923		8.13736	8.02907	8.19678
10.5553	32.6844	32.1766	31.7896		30.7364	31.2505	31.2505		28.6094	29.314	29.314		25.916	25.916	24.3287		23.0753	23.1811	23.0782		18.0343	18.0594	16.7024		16.2361	16.4449	16.564		12.9722	12.499	12.4994		10.7821	10.9312	10.9312		8.14102	8.03657	8.1993
10.5625	32.8778	32.3575	31.957		30.9042	31.4103	31.4103		28.7866	29.4696	29.4696		26.0362	26.0362	24.4398		23.1527	23.2598	23.1608		18.0815	18.1084	16.7456		16.2606	16.4643	16.5838		12.9911	12.5235	12.5171		10.7907	10.9374	10.9374		8.14394	8.04365	8.20148
10.5697	33.0604	32.5289	32.1143		31.0624	31.5591	31.5591		28.9552	29.6172	29.6172		26.149	26.149	24.5439		23.225	23.3318	23.2372		18.1253	18.1543	16.7862		16.2828	16.4806	16.6007		13.0083	12.5478	12.5328		10.7976	10.9417	10.9417		8.14629	8.05012	8.20334
10.5769	33.232	32.69	32.2616		31.2107	31.6966	31.6966		29.1156	29.7564	29.7564		26.2545	26.2545	24.641		23.2916	23.3968	23.3066		18.166	18.1965	16.824		16.3025	16.4941	16.6148		13.0236	12.5714	12.5466		10.8028	10.9442	10.9442		8.14818	8.05581	8.20484
10.5841	33.3928	32.8405	32.399		31.3488	31.8229	31.8229		29.2679	29.8873	29.8873		26.3526	26.3526	24.7314		23.3519	23.4547	23.3687		18.2039	18.2345	16.8593		16.3199	16.5048	16.626		13.0367	12.594	12.5587		10.8065	10.9449	10.9449		8.14974	8.06058	8.20588
10.5913	33.5431	32.9798	32.5264		31.477	31.9383	31.9383		29.412	30.0096	30.0096		26.4436	26.4436	24.815		23.4054	23.5056	23.4233		18.239	18.2678	16.892		16.3348	16.5129	16.6344		13.0474	12.6152	12.5689		10.8088	10.9439	10.9439		8.151	8.06441	8.20634
10.5985	33.6831	33.1077	32.6434		31.5956	32.0431	32.0431		29.548	30.1231	30.1231		26.5272	26.5272	24.8919		23.4519	23.5494	23.4707		18.2712	18.296	16.9222		16.347	16.5182	16.64		13.0555	12.6345	12.5774		10.8097	10.9413	10.9413		8.15195	8.06728	8.20608
10.6057	33.8129	33.2237	32.7497		31.7052	32.1376	32.1376		29.6756	30.2272	30.2272		26.6033	26.6033	24.9621		23.4913	23.5867	23.5113		18.3001	18.319	16.95		16.3565	16.5208	16.6427		13.061	12.6514	12.5841		10.8095	10.9374	10.9374		8.15254	8.06921	8.205
10.6129	33.9325	33.3276	32.845		31.8061	32.2217	32.2217		29.7943	30.3214	30.3214		26.6714	26.6714	25.0256		23.5239	23.6177	23.5456		18.3256	18.337	16.9752		16.3626	16.5204	16.6425		13.0642	12.6656	12.589		10.8081	10.9321	10.9321		8.15274	8.07021	8.20301
10.6201	34.0421	33.4192	32.9294		31.8983	32.2955	32.2955		29.9038	30.4053	30.4053		26.731	26.731	25.0826		23.5502	23.6433	23.574		18.3472	18.3501	16.9976		16.365	16.5174	16.6391		13.0652	12.677	12.592		10.8057	10.9256	10.9256		8.15253	8.07031	8.20009
10.6273	34.1415	33.4984	33.0033		31.9818	32.359	32.359		30.0034	30.4786	30.4786		26.7815	26.7815	25.1327		23.5705	23.6641	23.5968		18.3644	18.3588	17.0168		16.3633	16.5115	16.6322		13.0644	12.6856	12.5929		10.8024	10.9178	10.9178		8.15188	8.06956	8.19623
10.6345	34.2303	33.5656	33.0674		32.0562	32.412	32.412		30.0928	30.5407	30.5407		26.8225	26.8225	25.1759		23.5851	23.6803	23.614		18.377	18.3633	17.0322		16.3574	16.5028	16.6217		13.0619	12.6914	12.5915		10.7982	10.9089	10.9089		8.15075	8.06804	8.19148
10.6417	34.3079	33.6209	33.1222		32.1208	32.4546	32.4546		30.1715	30.5916	30.5916		26.8537	26.8537	25.212		23.5941	23.692	23.6256		18.3848	18.3637	17.0438		16.3472	16.4908	16.6074		13.0581	12.6946	12.588		10.793	10.899	10.899		8.14909	8.06581	8.18592
10.6489	34.3738	33.6644	33.1679		32.1748	32.4862	32.4862		30.2393	30.6309	30.6309		26.8755	26.8755	25.2411		23.5975	23.6991	23.6317		18.388	18.3604	17.0513		16.333	16.4755	16.589		13.0531	12.6951	12.5825		10.7868	10.8881	10.8881		8.14682	8.06288	8.17959
10.6561	34.4278	33.6967	33.2046		32.2172	32.5069	32.5069		30.296	30.6588	30.6588		26.8883	26.8883	25.2629		23.5951	23.7013	23.6317		18.3867	18.3534	17.0548		16.3153	16.4565	16.5668		13.0466	12.6932	12.5751		10.7793	10.8762	10.8762		8.14382	8.05927	8.17256
10.6633	34.4695	33.718	33.2319		32.2478	32.5165	32.5165		30.3419	30.6755	30.6755		26.8931	26.8931	25.2773		23.5866	23.6982	23.6254		18.3813	18.3427	17.0545		16.2944	16.4338	16.5409		13.0386	12.6889	12.566		10.7702	10.8634	10.8634		8.14	8.05496	8.16479
10.6705	34.4985	33.7285	33.2496		32.2667	32.5154	32.5154		30.377	30.6815	30.6815		26.8905	26.8905	25.2841		23.5715	23.6891	23.6124		18.3719	18.328	17.0505		16.271	16.4073	16.5118		13.0285	12.6824	12.5554		10.7592	10.8494	10.8494		8.13522	8.04992	8.15623
10.6777	34.5149	33.7283	33.2569		32.2742	32.5041	32.5041		30.4016	30.6769	30.6769		26.8813	26.8813	25.2833		23.5496	23.6736	23.5925		18.3585	18.3094	17.0432		16.2457	16.3767	16.4797		13.016	12.6738	12.5434		10.7464	10.8341	10.8341		8.12936	8.04412	8.14683
10.6849	34.5184	33.7175	33.2533		32.2707	32.4826	32.4826		30.4158	30.6623	30.6623		26.8659	26.8659	25.2747		23.5207	23.651	23.5659		18.3413	18.2867	17.0327		16.2188	16.3419	16.445		13.0007	12.663	12.5299		10.7316	10.8174	10.8174		8.12227	8.03754	8.13653
10.6921	34.5093	33.6963	33.2382		32.2565	32.4511	32.4511		30.4196	30.6381	30.6381		26.8445	26.8445	25.258		23.4848	23.6209	23.5325		18.32	18.2602	17.0189		16.1899	16.3032	16.4078		12.9822	12.6501	12.5148		10.7149	10.799	10.799		8.11385	8.03014	8.12528
10.6993	34.488	33.6646	33.211		32.2317	32.4095	32.4095		30.4133	30.605	30.605		26.8172	26.8172	25.2333		23.442	23.583	23.4925		18.2943	18.2302	17.0015		16.1587	16.2609	16.3679		12.9605	12.635	12.4979		10.6965	10.7788	10.7788		8.10408	8.02191	8.11301
10.7065	34.4548	33.6224	33.1719		32.1967	32.358	32.358		30.3973	30.5631	30.5631		26.7838	26.7838	25.2005		23.3923	23.5372	23.4458		18.2641	18.1971	16.9801		16.1245	16.2155	16.3252		12.9356	12.6179	12.479		10.6764	10.7567	10.7567		8.09299	8.01284	8.09963
10.7137	34.4102	33.5695	33.1211		32.1514	32.2967	32.2967		30.3722	30.5126	30.5126		26.7439	26.7439	25.1603		23.3357	23.4835	23.3923		18.2293	18.1611	16.9545		16.0868	16.1673	16.2792		12.9075	12.5987	12.4578		10.6548	10.7327	10.7327		8.08071	8.00292	8.08511
10.7209	34.3546	33.5062	33.0593		32.0957	32.2254	32.2254		30.3383	30.4536	30.4536		26.6972	26.6972	25.1131		23.2722	23.4222	23.3323		18.1899	18.1224	16.9245		16.0451	16.1167	16.2297		12.8768	12.5775	12.4343		10.6316	10.707	10.707		8.06739	7.99217	8.06946
10.7281	34.2886	33.4326	32.987		32.0295	32.1441	32.1441		30.2959	30.386	30.386		26.6433	26.6433	25.0597		23.2017	23.3534	23.2659		18.1459	18.0808	16.8903		15.999	16.0639	16.1763		12.8436	12.5542	12.4083		10.607	10.6796	10.6796		8.05321	7.98066	8.05277
10.7353	34.2131	33.3492	32.9045		31.9531	32.0524	32.0524		30.2451	30.3098	30.3098		26.5819	26.5819	25.0004		23.1244	23.2777	23.1932		18.0977	18.0363	16.8519		15.9486	16.0091	16.1193		12.8083	12.5286	12.3798		10.581	10.6507	10.6507		8.03829	7.96844	8.03519
10.7425	34.1289	33.2561	32.8121		31.8669	31.9503	31.9503		30.1864	30.2246	30.2246		26.5127	26.5127	24.9356		23.0405	23.1957	23.1142		18.0455	17.9884	16.8098		15.8941	15.9525	16.0587		12.7712	12.5008	12.3488		10.5534	10.6204	10.6204		8.02274	7.95557	8.01688
10.7497	34.0363	33.1537	32.7099		31.7719	31.8382	31.8382		30.1195	30.1302	30.1302		26.4354	26.4354	24.8656		22.9501	23.1082	23.0289		17.9898	17.9366	16.7645		15.8361	15.8937	15.9952		12.7324	12.4707	12.3154		10.5243	10.5888	10.5888		8.00661	7.94208	7.99797
10.7569	33.9354	33.0425	32.5982		31.6688	31.7164	31.7164		30.0439	30.0266	30.0266		26.3497	26.3497	24.7905		22.8539	23.016	22.9376		17.9307	17.8804	16.7164		15.7751	15.8326	15.929		12.6921	12.4384	12.2798		10.4936	10.5559	10.5559		7.98983	7.92795	7.97859
10.7641	33.8255	32.9231	32.4768		31.5581	31.5854	31.5854		29.9587	29.9138	29.9138		26.2557	26.2557	24.7104		22.7522	22.9197	22.8406		17.8682	17.8196	16.666		15.7118	15.7686	15.8608		12.6501	12.4039	12.2421		10.4614	10.5216	10.5216		7.97229	7.91315	7.95888
[truncated: 1,282 more rows]

## Sheet: Fig1-suppl2B-evaluation
	Stability (%)
[truncated: 12 more rows]

[truncated: 9 more sheets: Fig1-suppl2C, Fig1-suppl3D, Fig1-suppl2E, Fig1-suppl2F, Fig1-suppl2G, Fig1-suppl2H, Fig1-suppl2I, Fig1-suppl2J, Fig1-suppl2K]
