# Supplementary material for: Structural and functional properties of a plant NRAMP-related aluminum transporter
Source: eLife journal article supplement (doi:10.7554/elife.85641), 2023-04-05
Supplement: fig2-figsupp1-data1 [file Figure2-supplement1.xlsx]

## Sheet: Fig2-suppl1B
Nb6196
			Elution Volume (mL)	mAu
			0	0.11
			0.03	0.12
			0.05	0.11
			0.08	0.13
			0.11	0.09
			0.14	0.1
			0.16	0.13
			0.19	0.12
			0.22	0.09
			0.24	0.08
			0.27	0.07
			0.3	0.06
			0.32	0.06
			0.35	0.05
			0.38	0.04
			0.41	0.05
			0.43	0.04
			0.46	0.05
			0.49	0.05
			0.51	0.04
			0.54	0.03
			0.57	0.03
			0.6	0.05
			0.62	0.04
			0.65	0.03
			0.68	0.03
			0.7	0.02
			0.73	0.02
			0.76	0.02
			0.79	0.02
			0.81	0.03
			0.84	0.03
			0.87	0.02
			0.89	0.03
			0.92	0.03
			0.95	0.02
			0.97	0.01
			1	0.02
			1.03	0.01
			1.06	0.03
			1.08	0.02
			1.11	0.02
			1.14	0.02
			1.16	0.01
			1.19	0
			1.22	0.01
			1.25	0
			1.27	0
			1.3	0
			1.33	0.01
			1.35	0
			1.38	-0.01
			1.41	0
			1.44	0
			1.46	0
			1.49	0
			1.52	-0.01
			1.54	0
			1.57	0
			1.6	0.01
			1.62	-0.01
			1.65	0
			1.68	0.02
			1.71	-0.01
			1.73	-0.01
			1.76	0
			1.79	-0.01
			1.81	-0.01
			1.84	-0.01
			1.87	-0.01
			1.9	-0.02
			1.92	-0.01
			1.95	-0.01
			1.98	-0.01
			2	-0.01
			2.03	0
			2.06	-0.02
			2.08	-0.02
			2.11	-0.01
			2.14	-0.02
			2.17	-0.02
			2.19	-0.02
			2.22	-0.02
			2.25	-0.03
			2.27	-0.02
			2.3	-0.03
			2.33	-0.02
			2.36	-0.03
			2.38	-0.03
			2.41	-0.03
			2.44	-0.03
			2.46	-0.03
			2.49	-0.03
			2.52	-0.03
			2.55	-0.03
			2.57	-0.04
			2.6	-0.04
			2.63	-0.03
			2.65	-0.04
			2.68	-0.03
			2.71	-0.04
			2.73	-0.04
			2.76	-0.03
			2.79	-0.04
			2.82	-0.03
			2.84	-0.04
			2.87	-0.04
			2.9	-0.04
			2.92	-0.04
			2.95	-0.04
			2.98	-0.04
			3.01	-0.04
			3.03	-0.04
			3.06	-0.05
			3.09	-0.04
			3.11	-0.04
			3.14	-0.05
			3.17	-0.04
			3.19	-0.05
			3.22	-0.04
			3.25	-0.04
			3.28	-0.05
			3.3	-0.04
			3.33	-0.05
			3.36	-0.04
			3.38	-0.05
			3.41	-0.05
			3.44	-0.04
			3.47	-0.04
			3.49	-0.04
			3.52	-0.04
			3.55	-0.05
			3.57	-0.04
			3.6	-0.04
			3.63	-0.05
			3.66	-0.05
			3.68	-0.05
			3.71	-0.05
			3.74	-0.04
			3.76	-0.05
			3.79	-0.05
			3.82	-0.05
			3.84	-0.05
			3.87	-0.04
			3.9	-0.05
			3.93	-0.04
			3.95	-0.04
			3.98	-0.05
			4.01	-0.04
			4.03	-0.04
			4.06	-0.05
			4.09	-0.05
			4.12	-0.04
			4.14	-0.04
			4.17	-0.04
			4.2	-0.05
			4.22	-0.05
			4.25	-0.04
			4.28	-0.03
			4.31	-0.05
			4.33	-0.05
			4.36	-0.05
			4.39	-0.05
			4.41	-0.05
			4.44	-0.05
			4.47	-0.05
			4.49	-0.05
			4.52	-0.05
			4.55	-0.06
			4.58	-0.06
			4.6	-0.06
			4.63	-0.06
			4.66	-0.05
			4.68	-0.06
			4.71	-0.06
			4.74	-0.06
			4.77	-0.06
			4.79	-0.06
			4.82	-0.06
			4.85	-0.06
			4.87	-0.07
			4.9	-0.07
			4.93	-0.07
			4.95	-0.07
			4.98	-0.07
			5.01	-0.07
			5.04	-0.07
			5.06	-0.07
			5.09	-0.07
			5.12	-0.07
			5.14	-0.07
			5.17	-0.07
			5.2	-0.07
			5.23	-0.08
			5.25	-0.07
			5.28	-0.08
			5.31	-0.08
			5.33	-0.08
			5.36	-0.08
			5.39	-0.07
			5.42	-0.08
			5.44	-0.07
			5.47	-0.07
			5.5	-0.07
			5.52	-0.07
			5.55	-0.07
			5.58	-0.07
			5.6	-0.07
			5.63	-0.08
			5.66	-0.08
			5.69	-0.08
			5.71	-0.08
			5.74	-0.08
			5.77	-0.08
			5.79	-0.08
			5.82	-0.08
			5.85	-0.08
			5.88	-0.08
			5.9	-0.09
			5.93	-0.08
			5.96	-0.09
			5.98	-0.09
			6.01	-0.09
			6.04	-0.09
			6.06	-0.09
			6.09	-0.09
			6.12	-0.09
			6.15	-0.09
			6.17	-0.1
			6.2	-0.09
			6.23	-0.1
			6.25	-0.1
			6.28	-0.09
			6.31	-0.09
			6.34	-0.1
			6.36	-0.1
			6.39	-0.1
			6.42	-0.1
			6.44	-0.1
			6.47	-0.11
			6.5	-0.1
			6.53	-0.11
			6.55	-0.1
			6.58	-0.1
			6.61	-0.1
			6.63	-0.11
			6.66	-0.1
			6.69	-0.11
			6.71	-0.1
			6.74	-0.1
			6.77	-0.1
			6.8	-0.11
			6.82	-0.1
			6.85	-0.1
			6.88	-0.1
			6.9	-0.1
			6.93	-0.09
			6.96	-0.1
			6.99	-0.08
			7.01	-0.08
			7.04	-0.07
			7.07	-0.06
			7.09	-0.05
			7.12	-0.03
			7.15	-0.01
			7.18	0.02
			7.2	0.06
			7.23	0.09
			7.26	0.13
			7.28	0.18
			7.31	0.23
			7.34	0.29
			7.36	0.36
			7.39	0.43
			7.42	0.5
			7.45	0.58
			7.47	0.67
			7.5	0.76
			7.53	0.88
			7.55	1
			7.58	1.15
			7.61	1.33
			7.64	1.55
			7.66	1.8
			7.69	2.08
			7.72	2.41
			7.74	2.74
			7.77	3.12
			7.8	3.48
			7.82	3.89
			7.85	4.25
			7.88	4.64
			7.91	4.99
			7.93	5.36
			7.96	5.69
			7.99	6
			8.01	6.28
			8.04	6.51
			8.07	6.74
			8.1	6.89
			8.12	7.02
			8.15	7.1
			8.18	7.12
			8.2	7.11
			8.23	7.07
			8.26	7.03
			8.29	6.97
			8.31	6.92
			8.34	6.85
			8.37	6.8
			8.39	6.76
			8.42	6.72
			8.45	6.69
			8.47	6.67
			8.5	6.67
			8.53	6.67
			8.56	6.69
			8.58	6.72
			8.61	6.76
			8.64	6.81
			8.66	6.87
			8.69	6.93
			8.72	7.01
			8.75	7.08
			8.77	7.16
			8.8	7.24
			8.83	7.33
			8.85	7.44
			8.88	7.55
			8.91	7.65
			8.93	7.74
			8.96	7.81
			8.99	7.9
			9.02	7.98
			9.04	8.06
			9.07	8.15
			9.1	8.24
			9.12	8.32
			9.15	8.42
			9.18	8.51
			9.21	8.59
			9.23	8.67
			9.26	8.74
			9.29	8.83
			9.31	8.91
			9.34	8.99
			9.37	9.06
			9.4	9.15
			9.42	9.22
			9.45	9.3
			9.48	9.37
			9.5	9.45
			9.53	9.53
			9.56	9.52
			9.58	9.57
			9.61	9.62
			9.64	9.67
			9.67	9.72
			9.69	9.77
			9.72	9.81
			9.75	9.86
			9.77	9.89
			9.8	9.93
			9.83	9.96
			9.86	10
			9.88	10.03
			9.91	10.06
			9.94	10.09
			9.96	10.11
			9.99	10.15
			10.02	10.16
			10.05	10.19
			10.07	10.21
			10.1	10.23
			10.13	10.23
			10.15	10.25
			10.18	10.28
			10.21	10.29
			10.23	10.31
			10.26	10.32
			10.29	10.35
			10.32	10.36
			10.34	10.38
			10.37	10.38
			10.4	10.39
			10.42	10.4
			10.45	10.42
			10.48	10.45
			10.51	10.47
			10.53	10.48
			10.56	10.49
			10.59	10.51
			10.61	10.53
			10.64	10.56
			10.67	10.57
			10.69	10.59
			10.72	10.6
			10.75	10.61
			10.78	10.64
			10.8	10.65
			10.83	10.69
			10.86	10.69
			10.88	10.72
			10.91	10.73
			10.94	10.76
			10.97	10.78
			10.99	10.79
			11.02	10.8
			11.05	10.81
			11.07	10.84
			11.1	10.86
			11.13	10.89
			11.16	10.9
			11.18	10.92
			11.21	10.94
			11.24	10.98
			11.26	11.01
			11.29	11.03
			11.32	11.06
			11.34	11.08
			11.37	11.12
			11.4	11.15
			11.43	11.19
			11.45	11.22
			11.48	11.26
			11.51	11.28
			11.53	11.33
			11.56	11.36
			11.59	11.39
			11.62	11.43
			11.64	11.47
			11.67	11.52
			11.7	11.56
			11.72	11.6
			11.75	11.64
			11.78	11.7
			11.8	11.74
			11.83	11.79
			11.86	11.83
			11.89	11.88
			11.91	11.94
			11.94	11.98
			11.97	12.05
			11.99	12.09
			12.02	12.15
			12.05	12.2
			12.08	12.25
			12.1	12.3
			12.13	12.35
			12.16	12.4
			12.18	12.44
			12.21	12.49
			12.24	12.53
			12.27	12.58
			12.29	12.63
			12.32	12.68
			12.35	12.72
			12.37	12.76
			12.4	12.8
			12.43	12.85
			12.45	12.9
			12.48	12.93
			12.51	12.98
			12.54	13.01
			12.56	13.06
			12.59	13.1
			12.62	13.15
			12.64	13.19
			12.67	13.25
			12.7	13.29
			12.73	13.33
			12.75	13.38
			12.78	13.42
			12.81	13.47
			12.83	13.51
			12.86	13.57
			12.89	13.62
			12.92	13.66
			12.94	13.72
			12.97	13.77
			13	13.82
			13.02	13.86
			13.05	13.91
			13.08	13.95
			13.1	14
			13.13	14.04
			13.16	14.09
			13.19	14.13
			13.21	14.17
			13.24	14.22
			13.27	14.26
			13.29	14.31
			13.32	14.35
			13.35	14.41
			13.38	14.45
			13.4	14.52
			13.43	14.57
			13.46	14.64
			13.48	14.71
			13.51	14.78
			13.54	14.86
			13.56	14.94
			13.59	15.03
			13.62	15.1
			13.65	15.2
			13.67	15.28
			13.7	15.38
			13.73	15.46
			13.75	15.56
			13.78	15.65
			13.81	15.73
			13.84	15.81
			13.86	15.88
			13.89	15.96
			13.92	16.02
			13.94	16.08
			13.97	16.12
			14	16.17
			14.03	16.2
			14.05	16.25
			14.08	16.28
			14.11	16.31
			14.13	16.35
			14.16	16.37
			14.19	16.42
			14.21	16.43
			14.24	16.47
			14.27	16.5
			14.3	16.55
			14.32	16.6
			14.35	16.67
			14.38	16.73
			14.4	16.79
			14.43	16.89
			14.46	16.99
			14.49	17.12
			14.51	17.23
			14.54	17.4
			14.57	17.55
			14.59	17.75
			14.62	17.97
			14.65	18.24
			14.67	18.51
			14.7	18.8
			14.73	19.16
			14.76	19.51
			14.78	19.96
			14.81	20.35
			14.84	20.87
			14.86	21.32
			14.89	21.87
			14.92	22.42
			14.95	23.01
			14.97	23.6
			15	24.16
			15.03	24.78
			15.05	25.33
			15.08	25.94
			15.11	26.4
			15.14	26.92
			15.16	27.32
			15.19	27.78
			15.22	28.13
			15.24	28.45
			15.27	28.69
			15.3	28.88
			15.32	29.03
			15.35	29.07
			15.38	29.11
			15.41	29.05
			15.43	28.97
			15.46	28.82
			15.49	28.66
			15.51	28.43
			15.54	28.18
			15.57	27.92
			15.6	27.59
			15.62	27.31
			15.65	26.97
			15.68	26.67
			15.7	26.34
			15.73	26.06
			15.76	25.76
			15.79	25.49
			15.81	25.21
			15.84	25
			15.87	24.8
			15.89	24.61
			15.92	24.49
			15.95	24.35
			15.97	24.3
			16	24.24
			16.03	24.25
			16.06	24.26
			16.08	24.31
			16.11	24.4
			16.14	24.55
			16.16	24.7
			16.19	24.88
			16.22	25.1
			16.25	25.31
			16.27	25.57
			16.3	25.8
			16.33	26.09
			16.35	26.36
			16.38	26.63
			16.41	26.9
			16.43	27.22
			16.46	27.53
			16.49	27.85
			16.52	28.18
			16.54	28.52
			16.57	28.91
			16.6	29.29
			16.62	29.78
			16.65	30.32
			16.68	31.05
			16.71	31.93
			16.73	33.08
			16.76	34.47
			16.79	36.46
			16.81	38.7
			16.84	41.89
			16.87	45.39
			16.9	50.14
			16.92	55.59
			16.95	62.37
			16.98	70.75
			17	80.78
			17.03	92.9
			17.06	106.79
			17.08	123.65
			17.11	141.75
			17.14	163.77
			17.17	186.42
			17.19	212.64
			17.22	240.28
			17.25	270.21
			17.27	304.72
			17.3	340.31
			17.33	379.74
			17.36	417.65
			17.38	460.94
			17.41	500.71
			17.44	543.98
			17.46	581.78
			17.49	622.11
			17.52	656.13
			17.54	691.22
			17.57	720.13
			17.6	746.58
			17.63	767.87
			17.65	783.45
			17.68	793.4
			17.71	798.43
			17.73	796.39
			17.76	791.47
			17.79	779.56
			17.82	766.76
			17.84	748.46
			17.87	728.28
			17.9	705.55
			17.92	680.57
			17.95	655.78
			17.98	626.77
			18.01	601.45
			18.03	571.99
			18.06	547.78
			18.09	518.66
			18.11	494.67
			18.14	466.9
			18.17	443.05
			18.19	417.79
			18.22	394.68
			18.25	371.91
			18.28	348.82
			18.3	328.41
			18.33	307.17
			18.36	288.53
			18.38	269.54
			18.41	253.14
			18.44	236.31
			18.47	221.17
			18.49	206.52
			18.52	193.38
			18.55	181.01
			18.57	168.82
			18.6	158.53
			18.63	147.91
			18.66	139
			18.68	130.13
			18.71	122.85
			18.74	115.52
			18.76	109.07
			18.79	103.28
			18.82	97.85
			18.84	93.08
			18.87	88.44
			18.9	84.46
			18.93	80.68
			18.95	77.39
			18.98	74.2
			19.01	71.41
			19.03	68.65
			19.06	65.86
			19.09	63.39
			19.12	60.99
			19.14	58.81
			19.17	56.43
			19.2	54.38
			19.22	52.21
			19.25	50.33
			19.28	48.36
			19.3	46.59
			19.33	44.65
			19.36	42.88
			19.39	41.12
			19.41	39.54
			19.44	38
			19.47	36.45
			19.49	35.02
			19.52	33.57
			19.55	32.25
			19.58	30.95
			19.6	29.8
			19.63	28.55
			19.66	27.41
			19.68	26.35
			19.71	25.38
			19.74	24.44
			19.77	23.44
			19.79	22.51
			19.82	21.43
			19.85	20.44
			19.87	19.35
			19.9	18.35
			19.93	17.28
			19.95	16.37
			19.98	15.46
			20.01	14.77
			20.04	14.1
			20.06	13.54
			20.09	13.01
			20.12	12.53
			20.14	12.1
			20.17	11.72
			20.2	11.39
			20.23	11.04
			20.25	10.76
			20.28	10.48
			20.31	10.26
			20.33	10.06
			20.36	9.87
			20.39	9.71
			20.41	9.55
			20.44	9.43
			20.47	9.28
			20.5	9.18
			20.52	9.04
			20.55	8.91
			20.58	8.75
			20.6	8.64
			20.63	8.52
			20.66	8.37
			20.69	8.23
			20.71	8.07
			20.74	7.93
			20.77	7.76
			20.79	7.6
			20.82	7.42
			20.85	7.26
			20.88	7.1
			20.9	6.98
			20.93	6.9
			20.96	6.84
			20.98	6.85
			21.01	6.87
			21.04	6.9
			21.06	6.9
			21.09	6.91
			21.12	6.87
			21.15	6.82
			21.17	6.76
			21.2	6.72
			21.23	6.65
			21.25	6.58
			21.28	6.48
			21.31	6.36
			21.34	6.22
			21.36	6.08
			21.39	5.93
			21.42	5.77
			21.44	5.62
			21.47	5.46
			21.5	5.21
			21.53	4.91
			21.55	4.61
			21.58	4.36
			21.61	4.14
			21.63	3.99
			21.66	3.91
			21.69	3.89
			21.71	3.92
			21.74	3.96
			21.77	3.99
			21.8	4.03
			21.82	4.12
			21.85	4.24
			21.88	4.37
			21.9	4.34
			21.93	3.92
			21.96	3.26
			21.99	2.55
			22.01	2.15
			22.04	1.89
			22.07	1.73
			22.09	1.6
			22.12	1.51
			22.15	1.45
			22.17	1.39
			22.2	1.38
			22.23	1.39
			22.26	1.42
			22.28	1.46
			22.31	1.51
			22.34	1.55
			22.36	1.6
			22.39	1.6
			22.42	1.56
			22.45	1.5
			22.47	1.43
			22.5	1.37
			22.53	1.28
			22.55	1.2
			22.58	1.1
			22.61	1
			22.64	0.92
			22.66	0.85
			22.69	0.8
			22.72	0.74
			22.74	0.69
			22.77	0.66
			22.8	0.61
			22.82	0.58
			22.85	0.56
			22.88	0.52
			22.91	0.5
			22.93	0.48
			22.96	0.46
			22.99	0.43
			23.01	0.42
			23.04	0.41
			23.07	0.39
			23.1	0.38
			23.12	0.36
			23.15	0.36
			23.18	0.34
			23.2	0.33
			23.23	0.33
			23.26	0.31
			23.29	0.31
			23.31	0.3
			23.34	0.28
			23.37	0.28
			23.39	0.28
			23.42	0.27
			23.45	0.27
			23.47	0.25
			23.5	0.25
			23.53	0.24
			23.56	0.24
			23.58	0.24
			23.61	0.23
			23.64	0.23
			23.66	0.22
			23.69	0.23
			23.72	0.22
			23.75	0.21
			23.77	0.21
			23.8	0.21
			23.83	0.21
			23.85	0.2
			23.88	0.19
			23.91	0.18
			23.93	0.19
			23.96	0.19
			23.99	0.18
			24.02	0.18
			24.04	0.18
			24.07	0.17
			24.1	0.16
			24.12	0.16
			24.15	0.16
			24.18	0.15
			24.21	0.15
			24.23	0.15
			24.26	0.15
			24.29	0.14
			24.31	0.14
			24.34	0.15
			24.37	0.14
			24.4	0.13
			24.42	0.13
			24.45	0.13
			24.48	0.13
			24.5	0.13
			24.53	0.13
			24.56	0.13
			24.58	0.12
			24.61	0.12
			24.64	0.12
			24.67	0.13
			24.69	0.12
			24.72	0.12
			24.75	0.12
			24.77	0.12
			24.8	0.12
			24.83	0.12
			24.86	0.12
			24.88	0.12
			24.91	0.12
			24.94	0.12
			24.96	0.12
			24.99	0.13
			25.02	0.12
			25.04	0.13
			25.07	0.13
			25.1	0.12
			25.13	0.11
			25.15	0.13
			25.18	0.13
			25.21	0.13

## Sheet: Fig2-suppl1C
SiNRAT1-Nb6196-Amphipol		Elution volume (mL)	mAu
		0	0.09
		0.02	0.08
		0.05	0.08
		0.07	0.06
		0.1	0.07
		0.12	0.08
		0.15	0.07
		0.17	0.06
		0.2	0.05
		0.22	0.08
		0.25	0.08
		0.27	0.04
		0.3	0.05
		0.32	0.07
		0.35	0.05
		0.37	0.06
		0.4	0.06
		0.42	0.04
		0.45	0.04
		0.47	0.04
		0.5	0.05
		0.52	0.06
		0.55	0.03
		0.57	0.06
		0.6	0.07
		0.62	0.05
		0.65	0.04
		0.67	0.04
		0.7	0.03
		0.72	0.06
		0.75	0.05
		0.77	0.06
		0.8	0.05
		0.82	0.06
		0.85	0.03
		0.87	0.04
		0.9	0.04
		0.92	0.03
		0.95	0.05
		0.97	0.04
		1	0.04
		1.02	0.05
		1.05	0.04
		1.07	0.04
		1.1	0.04
		1.12	0.04
		1.15	0.05
		1.17	0.05
		1.2	0.05
		1.22	0.04
		1.25	0.05
		1.27	0.05
		1.3	0.04
		1.32	0.06
		1.35	0.05
		1.37	0.04
		1.4	0.06
		1.42	0.05
		1.45	0.05
		1.47	0.02
		1.5	0.03
		1.52	0.04
		1.55	0.05
		1.57	0.05
		1.6	0.07
		1.62	0.05
		1.65	0.07
		1.67	0.03
		1.7	0.05
		1.72	0.05
		1.75	0.04
		1.77	0.05
		1.8	0.04
		1.82	0.03
		1.85	0.06
		1.87	0.03
		1.9	0.05
		1.92	0.04
		1.95	0.05
		1.97	0.05
		2	0.05
		2.02	0.06
		2.05	0.04
		2.07	0.05
		2.1	0.03
		2.12	0.06
		2.15	0.06
		2.17	0.05
		2.2	0.04
		2.22	0.05
		2.25	0.05
		2.27	0.05
		2.3	0.05
		2.32	0.05
		2.35	0.05
		2.37	0.05
		2.4	0.03
		2.42	0.04
		2.45	0.06
		2.47	0.03
		2.5	0.05
		2.52	0.04
		2.55	0.05
		2.57	0.04
		2.6	0.04
		2.62	0.05
		2.65	0.05
		2.67	0.06
		2.7	0.04
		2.72	0.03
		2.75	0.05
		2.77	0.04
		2.8	0.06
		2.82	0.07
		2.85	0.04
		2.87	0.05
		2.9	0.04
		2.92	0.04
		2.95	0.06
		2.97	0.05
		3	0.04
		3.02	0.03
		3.05	0.04
		3.07	0.05
		3.1	0.03
		3.12	0.04
		3.15	0.04
		3.17	0.03
		3.2	0.03
		3.22	0.04
		3.25	0.03
		3.27	0.03
		3.3	0.05
		3.32	0.04
		3.35	0.02
		3.37	0.01
		3.4	0.04
		3.42	0.06
		3.45	0.06
		3.47	0.05
		3.5	0.03
		3.52	0.04
		3.55	0.04
		3.57	0.05
		3.6	0.02
		3.62	0.02
		3.65	0.03
		3.67	0.05
		3.7	0.02
		3.72	0.03
		3.75	0.04
		3.77	0.04
		3.8	0.04
		3.82	0.03
		3.85	0.04
		3.87	0.04
		3.9	0.04
		3.92	0.04
		3.95	0.01
		3.97	0.03
		4	0.02
		4.02	0.03
		4.05	0.02
		4.07	0.02
		4.1	0.03
		4.12	0.05
		4.15	0.03
		4.17	0.02
		4.2	0.05
		4.22	0.04
		4.25	0.03
		4.27	0.04
		4.3	0.04
		4.32	0.05
		4.35	0.02
		4.37	0.02
		4.4	0.03
		4.42	0.04
		4.45	0.05
		4.47	0.04
		4.5	0.05
		4.52	0.06
		4.55	0.06
		4.57	0.01
		4.6	0.03
		4.62	0.03
		4.65	0.03
		4.67	0
		4.7	0.04
		4.72	0.03
		4.75	0.02
		4.77	0.03
		4.8	0.02
		4.82	0.03
		4.85	0.05
		4.87	0.03
		4.9	0.01
		4.92	0.02
		4.95	0.02
		4.97	0.01
		5	0.02
		5.02	0.02
		5.05	0.05
		5.07	0.03
		5.1	0.01
		5.12	0.02
		5.15	0.03
		5.17	0.03
		5.2	0.02
		5.22	0.04
		5.25	0.04
		5.27	0.02
		5.3	0.02
		5.32	0.03
		5.35	0.03
		5.37	0.02
		5.4	0.01
		5.42	0.04
		5.45	0.02
		5.47	0
		5.5	0.02
		5.52	0.03
		5.55	0.03
		5.57	0.01
		5.6	0.03
		5.62	0.04
		5.65	0.03
		5.67	0.02
		5.7	0.03
		5.72	0.05
		5.75	0.03
		5.77	0.02
		5.8	0.02
		5.82	-0.01
		5.85	0.02
		5.87	0.03
		5.9	0.03
		5.92	0.03
		5.95	0.03
		5.97	0.04
		6	0.02
		6.02	0.03
		6.05	0
		6.07	0.02
		6.1	0.02
		6.12	0.02
		6.15	0.03
		6.17	0.02
		6.2	0.04
		6.22	0.02
		6.25	0.02
		6.27	0.02
		6.3	0.02
		6.32	0.03
		6.35	0.03
		6.37	0.03
		6.4	0.03
		6.42	0.03
		6.45	0.02
		6.47	0.03
		6.5	0.03
		6.52	0
		6.55	0.01
		6.57	0.03
		6.6	0.02
		6.62	0.01
		6.65	0.04
		6.67	0.03
		6.7	0.01
		6.72	0.01
		6.75	0.02
		6.77	0.02
		6.8	0.02
		6.82	0.02
		6.85	0.03
		6.87	0.01
		6.9	0.02
		6.92	0
		6.95	0.01
		6.97	0.02
		7	0.02
		7.02	-0.02
		7.05	-0.02
		7.07	0.01
		7.1	0.01
		7.12	0
		7.15	0.01
		7.17	0
		7.2	0
		7.22	0.01
		7.25	0
		7.27	0
		7.3	-0.01
		7.32	0
		7.35	-0.03
		7.37	-0.01
		7.4	0
		7.42	-0.02
		7.45	0.01
		7.47	0
		7.5	-0.01
		7.52	0
		7.55	0.01
		7.57	0.01
		7.6	0.02
		7.62	0
		7.65	-0.01
		7.67	0.01
		7.7	-0.01
		7.72	-0.01
		7.75	0
		7.77	0
		7.8	-0.01
		7.82	-0.01
		7.85	-0.01
		7.87	0.01
		7.9	0
		7.92	0.01
		7.95	-0.01
		7.97	0.01
		8	0.01
		8.02	0.01
		8.05	0
		8.07	-0.01
		8.1	0
		8.12	0.01
		8.15	-0.01
		8.17	-0.01
		8.2	0
		8.22	-0.01
		8.25	-0.01
		8.27	-0.01
		8.3	-0.01
		8.32	0
		8.35	0.01
		8.37	0.01
		8.4	0.01
		8.42	0
		8.45	0.01
		8.47	-0.01
		8.5	0.01
		8.52	-0.01
		8.55	0
		8.57	0.01
		8.6	0.02
		8.62	0.01
		8.65	0.01
		8.67	0.03
		8.7	0.01
		8.72	0.01
		8.75	0.05
		8.77	0.06
		8.8	0.03
		8.82	0.04
		8.85	0.06
		8.87	0.05
		8.9	0.06
		8.92	0.07
		8.95	0.06
		8.97	0.06
		9	0.06
		9.02	0.08
		9.05	0.09
		9.07	0.11
		9.1	0.11
		9.12	0.12
		9.15	0.14
		9.17	0.14
		9.2	0.15
		9.22	0.14
		9.25	0.17
		9.27	0.17
		9.3	0.18
		9.32	0.19
		9.35	0.23
		9.37	0.23
		9.4	0.23
		9.42	0.23
		9.45	0.24
		9.47	0.26
		9.5	0.3
		9.52	0.31
		9.55	0.33
		9.57	0.33
		9.6	0.34
		9.62	0.33
		9.65	0.38
		9.67	0.39
		9.7	0.41
		9.72	0.43
		9.75	0.47
		9.77	0.48
		9.8	0.48
		9.82	0.5
		9.85	0.54
		9.87	0.55
		9.9	0.6
		9.92	0.6
		9.95	0.63
		9.97	0.64
		10	0.68
		10.02	0.68
		10.05	0.73
		10.07	0.75
		10.1	0.77
		10.12	0.81
		10.15	0.84
		10.17	0.89
		10.2	0.91
		10.22	0.97
		10.25	0.99
		10.27	1.03
		10.3	1.05
		10.32	1.11
		10.35	1.14
		10.37	1.2
		10.4	1.23
		10.42	1.29
		10.45	1.33
		10.47	1.38
		10.5	1.44
		10.52	1.49
		10.55	1.54
		10.57	1.59
		10.6	1.68
		10.62	1.74
		10.65	1.8
		10.67	1.84
		10.7	1.91
		10.72	1.99
		10.75	2.03
		10.77	2.12
		10.8	2.18
		10.82	2.27
		10.85	2.33
		10.87	2.42
		10.9	2.53
		10.92	2.62
		10.95	2.7
		10.97	2.81
		11	2.92
		11.02	3.05
		11.05	3.17
		11.07	3.31
		11.1	3.44
		11.12	3.62
		11.15	3.82
		11.17	4.04
		11.2	4.27
		11.22	4.51
		11.25	4.81
		11.27	5.16
		11.3	5.51
		11.32	5.93
		11.35	6.35
		11.37	6.86
		11.4	7.37
		11.42	7.99
		11.45	8.66
		11.47	9.37
		11.5	10.14
		11.52	10.99
		11.55	11.85
		11.57	12.78
		11.6	13.68
		11.62	14.74
		11.65	15.7
		11.67	16.85
		11.7	17.89
		11.72	19.08
		11.75	20.21
		11.77	21.37
		11.8	22.54
		11.82	23.71
		11.85	24.91
		11.87	26
		11.9	27.15
		11.92	28.2
		11.95	29.29
		11.97	30.29
		12	31.3
		12.02	32.26
		12.05	33.24
		12.07	34.15
		12.1	35.05
		12.12	35.93
		12.15	36.8
		12.17	37.61
		12.2	38.43
		12.22	39.3
		12.25	40.13
		12.27	40.95
		12.3	41.82
		12.32	42.78
		12.35	43.75
		12.37	44.77
		12.4	45.87
		12.42	47.09
		12.45	48.36
		12.47	49.68
		12.5	51.11
		12.52	52.59
		12.55	54.24
		12.57	55.87
		12.6	57.66
		12.62	59.51
		12.65	61.46
		12.67	63.44
		12.7	65.45
		12.72	67.54
		12.75	69.53
		12.77	71.67
		12.8	73.56
		12.82	75.63
		12.85	77.46
		12.87	79.28
		12.9	80.93
		12.92	82.57
		12.95	83.93
		12.97	85.24
		13	86.27
		13.02	87.22
		13.05	87.82
		13.07	88.31
		13.1	88.56
		13.12	88.59
		13.15	88.42
		13.17	88.03
		13.2	87.4
		13.22	86.6
		13.25	85.61
		13.27	84.43
		13.3	83.12
		13.32	81.61
		13.35	80
		13.37	78.28
		13.4	76.52
		13.42	74.56
		13.45	72.7
		13.47	70.6
		13.5	68.6
		13.52	66.41
		13.55	64.36
		13.57	62.16
		13.6	60.14
		13.62	57.97
		13.65	56.04
		13.67	54.02
		13.7	52.2
		13.72	50.27
		13.75	48.46
		13.77	46.72
		13.8	45.02
		13.82	43.39
		13.85	41.81
		13.87	40.37
		13.9	38.92
		13.92	37.59
		13.95	36.3
		13.97	35.14
		14	33.97
		14.02	32.9
		14.05	31.87
		14.07	30.92
		14.1	29.98
		14.12	29.12
		14.15	28.28
		14.17	27.52
		14.2	26.78
		14.22	26.12
		14.25	25.45
		14.27	24.86
		14.3	24.31
		14.32	23.79
		14.35	23.27
		14.37	22.85
		14.4	22.41
		14.42	22.04
		14.45	21.66
		14.47	21.37
		14.5	21.04
		14.52	20.81
		14.55	20.55
		14.57	20.37
		14.6	20.17
		14.62	20.06
		14.65	19.95
		14.67	19.89
		14.7	19.85
		14.72	19.83
		14.75	19.85
		14.77	19.91
		14.8	19.99
		14.82	20.09
		14.85	20.25
		14.87	20.44
		14.9	20.64
		14.92	20.88
		14.95	21.17
		14.97	21.49
		15	21.85
		15.02	22.19
		15.05	22.61
		15.07	23.03
		15.1	23.5
		15.12	23.95
		15.15	24.45
		15.17	24.98
		15.2	25.5
		15.22	26.02
		15.25	26.57
		15.27	27.1
		15.3	27.64
		15.32	28.16
		15.35	28.64
		15.37	29.07
		15.4	29.47
		15.42	29.82
		15.45	30.08
		15.47	30.31
		15.5	30.46
		15.52	30.56
		15.55	30.58
		15.57	30.55
		15.6	30.45
		15.62	30.29
		15.65	30.05
		15.67	29.75
		15.69	29.44
		15.72	29.07
		15.74	28.66
		15.77	28.18
		15.79	27.69
		15.82	27.12
		15.84	26.54
		15.87	25.94
		15.89	25.3
		15.92	24.59
		15.94	23.93
		15.97	23.18
		15.99	22.5
		16.02	21.75
		16.04	21.01
		16.07	20.26
		16.09	19.56
		16.12	18.81
		16.14	18.07
		16.17	17.32
		16.19	16.61
		16.22	15.87
		16.24	15.16
		16.27	14.46
		16.29	13.8
		16.32	13.16
		16.34	12.54
		16.37	11.93
		16.39	11.37
		16.42	10.8
		16.44	10.27
		16.47	9.76
		16.49	9.26
		16.52	8.83
		16.54	8.36
		16.57	7.93
		16.59	7.57
		16.62	7.24
		16.64	6.89
		16.67	6.57
		16.69	6.32
		16.72	6.09
		16.74	5.85
		16.77	5.64
		16.79	5.47
		16.82	5.36
		16.84	5.21
		16.87	5.17
		16.89	5.16
		16.92	5.19
		16.94	5.29
		16.97	5.46
		16.99	5.72
		17.02	6.05
		17.04	6.51
		17.07	7.08
		17.09	7.82
		17.12	8.6
		17.14	9.64
		17.17	10.76
		17.19	12.12
		17.22	13.58
		17.24	15.24
		17.27	17.04
		17.29	19.09
		17.32	21.26
		17.34	23.64
		17.37	26.13
		17.39	28.8
		17.42	31.53
		17.44	34.42
		17.47	37.26
		17.49	40.22
		17.52	43.07
		17.54	46.06
		17.57	48.76
		17.59	51.64
		17.62	54.29
		17.64	56.91
		17.67	59.28
		17.69	61.54
		17.72	63.56
		17.74	65.34
		17.77	66.81
		17.79	68.05
		17.82	69.16
		17.84	69.87
		17.87	70.37
		17.89	70.58
		17.92	70.53
		17.94	70.23
		17.97	69.69
		17.99	68.91
		18.02	67.88
		18.04	66.72
		18.07	65.31
		18.09	63.77
		18.12	62.09
		18.14	60.29
		18.17	58.39
		18.19	56.34
		18.22	54.21
		18.24	52.04
		18.27	49.8
		18.29	47.53
		18.32	45.27
		18.34	43.02
		18.37	40.79
		18.39	38.61
		18.42	36.44
		18.44	34.37
		18.47	32.27
		18.49	30.27
		18.52	28.26
		18.54	26.4
		18.57	24.57
		18.59	22.87
		18.62	21.18
		18.64	19.7
		18.67	18.11
		18.69	16.87
		18.72	15.5
		18.74	14.4
		18.77	13.21
		18.79	12.22
		18.82	11.19
		18.84	10.34
		18.87	9.48
		18.89	8.73
		18.92	7.99
		18.94	7.37
		18.97	6.78
		18.99	6.27
		19.02	5.75
		19.04	5.34
		19.07	4.92
		19.09	4.54
		19.12	4.19
		19.14	3.91
		19.17	3.62
		19.19	3.38
		19.22	3.15
		19.24	2.95
		19.27	2.76
		19.29	2.61
		19.32	2.46
		19.34	2.33
		19.37	2.2
		19.39	2.13
		19.42	2
		19.44	1.93
		19.47	1.86
		19.49	1.79
		19.52	1.73
		19.54	1.68
		19.57	1.63
		19.59	1.58
		19.62	1.54
		19.64	1.5
		19.67	1.46
		19.69	1.43
		19.72	1.39
		19.74	1.39
		19.77	1.35
		19.79	1.35
		19.82	1.31
		19.84	1.27
		19.87	1.27
		19.89	1.26
		19.92	1.24
		19.94	1.21
		19.97	1.18
		19.99	1.17
		20.02	1.16
		20.04	1.13
		20.07	1.12
		20.09	1.11
		20.12	1.1
		20.14	1.07
		20.17	1.09
		20.19	1.06
		20.22	1.04
		20.24	1.03
		20.27	1
		20.29	1.01
		20.32	0.99
		20.34	0.99
		20.37	0.97
		20.39	0.94
		20.42	0.94
		20.44	0.94
		20.47	0.92
		20.49	0.93
		20.52	0.93
		20.54	0.94
		20.57	0.92
		20.59	0.92
		20.62	0.93
		20.64	0.93
		20.67	0.94
		20.69	0.95
		20.72	0.94
		20.74	0.96
		20.77	0.97
		20.79	0.99
		20.82	0.99
		20.84	1
		20.87	1.04
		20.89	1.05
		20.92	1.08
		20.94	1.09
		20.97	1.1
		20.99	1.11
		21.02	1.12
		21.04	1.18
		21.07	1.18
		21.09	1.19
		21.12	1.21
		21.14	1.22
		21.17	1.22
		21.19	1.24
		21.22	1.24
		21.24	1.27
		21.27	1.27
		21.29	1.27
		21.32	1.29
		21.34	1.3
		21.37	1.3
		21.39	1.28
		21.42	1.31
		21.44	1.3
		21.47	1.29
		21.49	1.27
		21.52	1.29
		21.54	1.28
		21.57	1.27
		21.59	1.26
		21.62	1.25
		21.64	1.25
		21.67	1.24
		21.69	1.24
		21.72	1.2
		21.74	1.2
		21.77	1.17
		21.79	1.14
		21.82	1.12
		21.84	1.1
		21.87	1.11
		21.89	1.11
		21.92	1.09
		21.94	1.08
		21.97	1.06
		21.99	1.05
		22.02	1.03
		22.04	1.03
		22.07	1.02
		22.09	1
		22.12	1
		22.14	0.99
		22.17	0.96
		22.19	0.96
		22.22	0.94
		22.24	0.93
		22.27	0.92
		22.29	0.89
		22.32	0.9
		22.34	0.9
		22.37	0.87
		22.39	0.87
		22.42	0.88
		22.44	0.86
		22.47	0.86
		22.49	0.83
		22.52	0.84
		22.54	0.81
		22.57	0.82
		22.59	0.8
		22.62	0.8
		22.64	0.79
		22.67	0.79
		22.69	0.77
		22.72	0.76
		22.74	0.76
		22.77	0.75
		22.79	0.74
		22.82	0.73
		22.84	0.72
		22.87	0.71
		22.89	0.69
		22.92	0.69
		22.94	0.67
		22.97	0.65
		22.99	0.66
		23.02	0.67
		23.04	0.63
		23.07	0.62
		23.09	0.62
		23.12	0.6
		23.14	0.6
		23.17	0.6
		23.19	0.57
		23.22	0.58
		23.24	0.59
		23.27	0.55
		23.29	0.57
		23.32	0.57
		23.34	0.55
		23.37	0.54
		23.39	0.55
		23.42	0.54
		23.44	0.53
		23.47	0.52
		23.49	0.52
		23.52	0.49
		23.54	0.52
		23.57	0.52
		23.59	0.51
		23.62	0.52
		23.64	0.49
		23.67	0.49
		23.69	0.49
		23.72	0.48
		23.74	0.49
		23.77	0.48

## Sheet: Fig2-suppl1D
SiNRAT1
LPR50
																								Condition
			Mn (uM) / Nb6196 (nM)										Mn (uM) / Nb6196 (nM)											Mean	SEM	N
Cycle Nr.	Time (min)		0/0	0/0	50/0	50/50	50/250	50/0	50/50	50/250	50/250		0/0	50/0	50/50	50/250	0/0	50/0	50/50	50/250			Time (min)	0 μM Mn2+ / 0 nM Nb6196			50 μM Mn2+ / 0 nM Nb6196			50 μM Mn2+ / 50 nM Nb6196			50 μM Mn2+ / 250 nM Nb6196
1	-6.17765		130.954	127.626	152.699	142.273	147.232	185.603	165.756	173.371	159.154		120.674	145.951	135.773	136.237	123.538	132.288	136.116	134.929			-6.17765	125.698	2.25911	4	154.135	11.316	4	144.979	7.08468	4	150.185	7.2596	5
2	-6.11088		125.795	124.938	148.422	141.139	140.888	182.889	167.607	171.535	158.055		119.551	140.082	133.018	135.497	119.476	128.858	130.026	133.775			-6.11088	122.44	1.69873	4	150.063	11.653	4	142.947	8.54857	4	147.95	7.2947	5
3	-6.04397		125.7	125.931	147.072	141.262	141.41	179.544	167.254	173.021	140.114		116.18	133.985	128.368	131.969	117.616	129.193	128.961	128.046			-6.04397	121.356	2.59125	4	147.449	11.3461	4	141.461	9.09671	4	142.912	7.9291	5
4	-5.9773		122.996	121.547	146.461	137.515	139.191	178.429	166.593	166.638	134.459		115.206	134.031	128.713	125.784	117.236	127.98	128.705	127.961			-5.9773	119.246	1.81934	4	146.725	11.2463	4	140.382	8.98034	4	138.806	7.35129	5
5	-5.91062		121.245	115.447	144.781	132.413	136.736	175.23	164.478	165.282	137.876		112.247	131.21	128.541	123.519	117.084	126.725	127.811	126.806			-5.91062	116.506	1.87199	4	144.487	10.943	4	138.311	8.78062	4	138.044	7.35154	5
6	-5.844		118.98	115.86	138.238	133.202	134.569	175.085	159.674	160.297	136.005		111.648	131.301	126.216	125.174	112.528	121.79	127.172	128.174			-5.844	114.754	1.67531	4	141.604	11.6585	4	136.566	7.8563	4	136.844	6.19388	5
7	-5.77718		115.705	115.364	140.097	131.871	136.162	173.049	160.115	161.041	136.371		110.037	129.618	127.421	123.955	110.744	121.999	125.341	125.139			-5.77718	112.963	1.4935	4	141.191	11.2487	4	136.187	8.09134	4	136.533	6.66645	5
8	-5.71053		117.4	114.95	140.046	130.491	133.342	167.814	155.443	156.624	134.093		108.689	131.756	123.935	120.645	109.491	120.912	125.298	124.113			-5.71053	112.633	2.11178	4	140.132	10.0244	4	133.792	7.354	4	133.763	6.27753	5
9	-5.64412		114.773	113.937	138.646	128.814	132.585	169.559	155.311	155.4	137.022		110.262	132.302	118.381	121.951	109.112	121.288	121.934	121.89			-5.64412	112.021	1.37841	4	140.449	10.3447	4	131.11	8.35248	4	133.77	6.16712	5
10	-5.57733		114.982	112.035	136.125	130.786	133.499	166.311	151.212	151.246	136.859		108.764	131.392	119.458	123.171	107.175	117.859	121.465	119.41			-5.57733	110.739	1.7388	4	137.922	10.224	4	130.73	7.2596	4	132.837	5.60908	5
11	-5.51052		114.944	109.14	132.281	127.015	129.138	166.214	152.182	152.383	133.238		109.288	126.797	119.328	122.43	106.644	114.931	118.441	116.546			-5.51052	110.004	1.75477	4	135.056	10.9991	4	129.242	7.88522	4	130.747	6.11458	5
12	-5.44398		113.573	109.078	132.816	125.98	131.775	164.372	150.198	151.071	133.076		105.88	126.115	115.669	116.638	104.594	116.478	118.825	117.358			-5.44398	108.281	2.00004	4	134.945	10.3662	4	127.668	7.81365	4	129.984	6.30472	5
13	-5.37733		112.869	108.002	131.288	126.029	133.238	164.518	149.052	148.972	132.832		104.831	124.75	113.861	113.676	103.227	118.57	116.61	113.425			-5.37733	107.232	2.12465	4	134.781	10.2466	4	126.388	7.9913	4	128.428	6.73545	5
14	-5.31067		111.746	108.933	131.874	126.152	129.739	159.816	147.951	149.497	133.93		102.921	125.569	113.991	114.199	104.29	112.798	114.395	111.971			-5.31067	106.973	2.04602	4	132.514	9.92789	4	125.622	7.95917	4	127.867	6.88346	5
15	-5.24398		110.051	106.948	133.859	126.941	128.146	157.877	145.262	150.109	133.645		103.146	121.838	113.818	110.017	104.366	111.711	113.799	113.724			-5.24398	106.128	1.52921	4	131.321	9.94214	4	124.955	7.44317	4	127.128	7.22529	5
16	-5.17732		108.509	105.687	132.052	122.43	129.034	158.846	145.835	146.043	132.303		99.5506	120.883	114.593	109.974	102.088	112.212	113.458	110.56			-5.17732	103.959	1.97115	4	130.998	10.1319	4	124.079	7.52125	4	125.583	6.87387	5
17	-5.11063		108.814	108.499	133.758	126.325	129.217	158.652	145.483	146.48	130.513		101.498	122.611	113.646	109.8	100.494	110.707	112.606	109.363			-5.11063	104.826	2.22184	4	131.432	10.2213	4	124.515	7.65322	4	125.074	7.01819	5
18	-5.04387		108.738	106.534	132.561	126.078	128.903	155.162	143.235	144.25	130.35		103.371	119.791	111.666	108.667	100.19	108.114	109.71	110.603			-5.04387	104.708	1.86587	4	128.907	10.0754	4	122.672	7.76517	4	124.555	6.66135	5
19	-4.9772		109.728	104.673	134.47	123.071	129.295	158.313	142.221	143.769	128.804		100.787	120.746	110.633	111.15	101.67	108.783	113.458	110.304			-4.9772	104.215	2.01722	4	130.578	10.6305	4	122.346	7.13991	4	124.664	6.29463	5
20	-4.91092		108.053	105.004	131.39	123.515	128.068	157.78	141.34	144.031	129.048		98.6891	119.654	111.149	110.54	98.1017	108.616	112.351	107.952			-4.91092	102.462	2.43177	4	129.36	10.5528	4	122.089	6.99483	4	123.928	6.64067	5
21	-4.844		107.405	104.818	128.411	122.849	126.71	158.556	142.133	143.201	129.943		98.8764	120.109	113.56	112.064	99.8102	108.95	111.797	108.807			-4.844	102.727	2.03293	4	129.007	10.6259	4	122.585	6.95235	4	124.145	6.263	5
22	-4.77732		106.339	105.728	129.659	121.223	126.11	156.762	141.119	141.976	129.251		102.135	118.926	109.944	108.754	99.3546	109.41	110.264	110.988			-4.77732	103.389	1.6336	4	128.689	10.2307	4	120.638	7.31328	4	123.416	6.14501	5
23	-4.71067		108.586	104.901	132.536	121.346	125.614	155.502	141.031	143.813	127.705		98.427	119.745	109.212	107.491	102.316	107.946	108.688	108.636			-4.71067	103.557	2.1399	4	128.932	10.1806	4	120.069	7.5743	4	122.652	6.73937	5
24	-4.644		106.453	104.467	130.066	120.951	125.561	155.453	139.797	142.632	129.577		97.9401	115.651	107.619	109.582	100.38	108.783	109.199	109.106			-4.644	102.31	1.92876	4	127.488	10.3227	4	119.392	7.42345	4	123.292	6.35568	5
25	-4.57733		104.302	106.927	128.793	118.092	124.648	151.285	138.519	140.577	129.089		99.1011	118.972	109.298	111.672	98.5573	106.399	109.838	109.363			-4.57733	102.222	2.0338	4	126.362	9.48762	4	118.937	6.8305	4	123.07	5.7576	5
26	-4.51053		105.806	104.983	130.728	118.684	124.961	154.048	138.475	139.222	128.682		99.7004	115.742	109.255	108.537	97.1906	108.448	111.499	110.517			-4.51053	101.92	2.07729	4	127.241	10.0671	4	119.478	6.64384	4	122.384	5.75491	5
27	-4.444		104.417	105.19	128.844	120.902	123.316	152.642	139.445	141.495	129.251		97.1161	115.833	108.739	108.537	98.899	104.935	107.751	109.064			-4.444	101.405	2.00149	4	125.563	10.2641	4	119.209	7.37821	4	122.333	6.25477	5
28	-4.37732		103.712	103.164	130.27	118.363	122.611	150.364	136.844	141.758	130.269		96.6667	117.379	105.553	108.537	98.2156	105.604	108.986	107.781			-4.37732	100.44	1.76333	4	125.904	9.5833	4	117.437	7.01274	4	122.191	6.48988	5
29	-4.31063		104.531	102.73	128.513	120.705	123.943	153.66	139.621	140.227	129.455		97.3408	116.652	107.835	109.146	97.6082	106.524	108.475	106.798			-4.31063	100.552	1.81542	4	126.337	10.1555	4	119.159	7.43564	4	121.914	6.27644	5
30	-4.24402		102.037	106.245	130.219	121.444	125.379	150.267	138.519	139.091	132.343		96.8165	115.196	105.553	107.186	97.6082	106.483	107.325	106.712			-4.24402	100.677	2.18271	4	125.541	9.58944	4	118.211	7.64632	4	122.142	6.57093	5
31	-4.17732		101.789	105.438	131.696	119.768	123.603	147.988	137.99	137.167	127.583		97.4157	117.061	107.576	108.362	97.5323	105.939	108.135	107.781			-4.17732	100.544	1.92274	4	125.671	9.11889	4	118.367	7.11909	4	120.899	5.68275	5
32	-4.11063		104.302	105.252	126.324	119.965	123.499	150.945	133.848	137.604	127.217		97.0037	115.924	107.619	106.925	96.5831	106.524	107.24	107.696			-4.11063	100.785	2.31448	4	124.929	9.56822	4	117.168	6.2966	4	120.588	5.89425	5
33	-4.044		103.331	104.218	126.858	119.226	120.809	149.249	137.373	136.948	127.909		97.0412	118.653	108.265	108.972	95.5961	106.566	106.218	105.857			-4.044	100.047	2.18009	4	125.332	8.99581	4	117.771	7.1309	4	120.099	5.79666	5
34	-3.97735		103.522	103.66	128.971	120.631	123.133	148.376	136.139	139.047	128.275		97.5655	114.832	107.921	107.274	96.6211	103.806	106.133	104.446			-3.97735	100.342	1.88578	4	123.996	9.62105	4	117.706	6.94039	4	120.435	6.49619	5
35	-3.91067		102.627	105.17	126.4	116.244	123.368	149.636	135.919	137.954	129.089		95.5431	115.924	105.941	106.751	95.8618	106.148	108.049	104.746			-3.91067	99.8004	2.42308	4	124.527	9.33541	4	116.538	6.83171	4	120.381	6.41791	5
36	-3.844		101.485	106.844	127.851	117.451	122.037	144.401	131.6	134.018	128.397		94.2322	115.332	104.821	105.618	95.8618	104.768	107.581	105.045			-3.844	99.6059	2.86971	4	123.088	8.52804	4	115.363	6.05311	4	119.023	5.9029	5
37	-3.77732		100.381	106.141	127.037	119.916	124.752	148.376	136.183	137.298	126.444		95.3933	114.058	105.854	106.446	96.2794	104.893	105.281	107.952			-3.77732	99.5487	2.45139	4	123.591	9.42803	4	116.809	7.29104	4	120.578	5.87586	5
38	-3.71068		101.98	103.35	124.822	117.279	120.679	146.631	133.848	136.511	129.536		94.8315	115.332	107.964	106.446	96.735	103.973	105.707	106.114			-3.71068	99.224	2.04342	4	122.69	9.047	4	116.199	6.39359	4	119.857	6.08458	5
39	-3.64388		102.342	101.716	124.72	118.561	123.943	149.394	137.109	134.018	129.943		94.0075	111.738	104.778	105.575	96.0137	104.559	104.344	103.42			-3.64388	98.5197	2.07092	4	122.603	9.85684	4	116.198	7.71239	4	119.38	6.29273	5
40	-3.5773		101.485	101.985	124.542	119.941	123.394	144.789	135.037	135.243	128.56		94.4569	117.152	105.768	107.535	95.1784	104.057	105.409	106.37			-3.5773	98.2763	2.00488	4	122.635	8.51298	4	116.539	7.03356	4	120.22	5.73603	5
41	-3.51068		100.971	102.068	126.069	116.638	121.802	145.662	134.685	133.1	129.373		92.9213	116.106	106.672	107.622	96.8109	105.353	107.027	103.805			-3.51068	98.1927	2.09028	4	123.297	8.57105	4	116.256	6.56242	4	119.14	5.80741	5
42	-3.44388		101.542	102.233	124.873	116.515	124.151	145.565	133.759	138.697	126.973		93.1461	114.604	105.854	107.796	96.735	104.517	104.514	104.489			-3.44388	98.4141	2.13973	4	122.39	8.77163	4	115.161	6.75581	4	120.421	6.34062	5
43	-3.3771		99.6573	101.592	128.742	119.078	122.507	146.243	130.807	134.499	130.919		93.8577	114.058	107.404	106.751	94.533	103.471	104.557	104.446			-3.3771	97.4101	1.90257	4	123.129	9.28476	4	115.461	6.0026	4	119.824	6.13615	5
44	-3.31063		102.151	101.551	126.553	117.008	120	144.935	132.217	136.773	129.211		93.3708	115.287	106.759	107.317	95.1025	103.555	104.94	103.891			-3.31063	98.0439	2.2297	4	122.582	8.80652	4	115.231	6.25402	4	119.438	6.26484	5
45	-3.24402		100.971	101.385	122.989	120.261	122.298	142.947	128.559	135.461	127.055		92.9588	113.239	105.338	105.531	94.2673	102.384	103.578	103.891			-3.24402	97.3956	2.20176	4	120.39	8.61652	4	114.434	6.01436	4	118.847	6.14941	5
46	-3.17722		102.17	103.474	124.669	121.568	126.031	144.692	131.776	135.068	126.2		93.4082	112.83	105.424	103.267	93.6219	103.68	105.92	106.071			-3.17722	98.1686	2.7002	4	121.468	8.85355	4	116.172	6.4111	4	119.327	6.2194	5
47	-3.1104		100.076	103.04	125.28	119.744	120.444	146.631	131.071	133.975	126.363		95.9176	114.24	105.854	106.446	93.47	102.677	105.622	103.335			-3.1104	98.1259	2.13117	4	122.207	9.35807	4	115.573	6.13092	4	118.112	5.82923	5
48	-3.04402		101.294	103.536	127.113	117.353	122.037	142.317	134.597	130.258	126.77		93.7828	113.831	104.046	105.793	93.8117	102.384	104.813	102.779			-3.04402	98.1062	2.52954	4	121.411	8.60748	4	115.202	7.14822	4	117.527	5.5814	5
49	-2.97723		99.3147	103.205	125.153	118.955	121.149	145.032	131.864	133.1	123.312		94.7191	113.558	105.123	107.143	94.1534	102.509	102.726	105.301			-2.97723	97.8481	2.12701	4	121.563	9.08653	4	114.667	6.75661	4	118.001	5.22146	5
50	-2.0669		100.628	109.884	133.529	123.441	136.606	154.241	145.527	143.332	134.784		114.607	139.445	131.167	128.397	118.147	128.022	127.683	129.243			-2.0669	110.817	3.79448	4	138.809	5.6481	4	131.954	4.79192	4	134.472	2.71469	5
51	-2.00452		97.4872	108.623	133.987	125.881	134.23	154.338	139.489	141.364	135.964		115.094	137.989	128.756	127.221	118.793	127.52	128.578	130.74			-2.00452	109.999	4.67016	4	138.459	5.71575	4	130.676	3.01034	4	133.904	2.39455	5
52	-1.94217		98.5151	108.726	133.019	124.673	136.24	152.206	142.398	142.763	134.459		117.828	135.123	130.176	129.486	115.262	128.775	129.216	127.405			-1.94217	110.083	4.30561	4	137.281	5.14716	4	131.616	3.78892	4	134.071	2.70067	5
53	-1.87975		100.723	109.739	131.288	123.515	136.371	152.593	138.211	137.604	134.093		117.266	134.395	127.335	126.96	115.452	127.353	126.32	124.327			-1.87975	110.795	3.72055	4	136.407	5.58442	4	128.845	3.22464	4	131.871	2.63711	5
54	-1.81725		98.4009	109.057	138.315	123.564	138.225	149.152	140.767	140.446	130.513		115.618	139.536	128.584	125.261	115.566	126.934	127.342	125.438			-1.81725	109.66	4.05695	4	138.484	4.54909	4	130.064	3.72377	4	131.977	3.16825	5
55	-1.75487		99.0482	110.256	133.885	124.673	133.525	149.297	141.472	139.44	133.116		115.169	135.532	130.349	124.39	113.971	126.056	126.831	126.08			-1.75487	109.611	3.67295	4	136.193	4.83253	4	130.831	3.73471	4	131.31	2.73415	5
56	-1.69253		97.5443	110.67	134.19	124.969	134.021	151.478	141.384	137.997	132.547		114.345	134.349	125.7	124.869	114.655	124.718	126.491	124.327			-1.69253	109.303	4.02278	4	136.184	5.57326	4	129.636	3.92833	4	130.752	2.66735	5
57	-1.63018		97.925	106.741	134.369	124.624	130.339	150.945	141.692	139.921	127.461		113.596	133.121	125.613	125.348	111.579	127.478	127.129	125.823			-1.63018	107.46	3.48862	4	136.478	5.04991	4	129.765	4.00909	4	129.779	2.68171	5
58	-1.56777		96.9541	108.83	130.626	123.49	132.324	152.254	141.252	137.167	128.763		115.843	136.215	124.796	124.434	115.034	127.185	124.532	125.909			-1.56777	109.165	4.36136	4	136.57	5.54913	4	128.517	4.25416	4	129.719	2.29803	5
59	-1.50535		97.1635	108.478	131.085	125.832	134.804	151.624	140.899	140.052	128.356		113.745	135.669	125.656	129.486	114.237	126.683	126.533	126.593			-1.50535	108.406	3.96764	4	136.265	5.43824	4	129.73	3.72779	4	131.858	2.46416	5
60	-1.44295		99.7716	108.478	135.871	123.811	132.298	150.073	140.238	139.44	128.478		113.446	136.124	126.474	125.087	114.161	124.676	125.256	125.609			-1.44295	108.964	3.31451	4	136.686	5.19958	4	128.945	3.80361	4	130.183	2.6454	5
61	-1.38053		98.3438	109.16	130.754	124.55	132.089	148.57	138.519	137.079	127.014		114.607	133.303	127.723	124.826	114.503	124.927	124.83	124.07			-1.38053	109.153	3.82101	4	134.388	5.04174	4	128.905	3.28384	4	129.016	2.45443	5
62	-1.31805		96.8399	107.754	135.514	124.378	129.608	146.97	136.095	136.248	125.753		114.12	136.67	125.743	126.699	114.503	126.6	123.509	124.156			-1.31805	108.304	4.12287	4	136.439	4.16964	4	127.431	2.92434	4	128.493	2.13229	5
63	-1.25553		98.1344	107.031	132.587	121.494	132.559	145.856	135.61	134.587	127.665		113.858	138.262	126.259	124.39	114.579	126.182	124.233	125.609			-1.25553	108.4	3.82121	4	135.721	4.18324	4	126.899	3.0635	4	128.962	1.9799	5
64	-1.19318		96.9732	111.745	132.205	120.434	129.608	146.146	136.844	135.724	128.438		115.506	135.305	126.431	124.564	113.971	125.261	126.618	124.498			-1.19318	109.549	4.26235	4	134.729	4.34642	4	127.582	3.40516	4	128.566	2.06033	5
65	-1.1308		96.6495	107.692	130.804	121.617	131.828	145.177	137.77	135.724	125.671		113.521	136.488	125.656	123.78	113.478	124.509	125.468	123.514			-1.1308	107.835	3.97178	4	134.244	4.3891	4	127.628	3.50643	4	128.103	2.42489	5
66	-1.0683		96.5924	106.969	132.052	122.184	130.261	143.432	136.448	138.435	126.688		112.547	137.307	126.173	124.913	114.389	127.478	124.148	127.405			-1.0683	107.624	4.00127	4	135.067	3.43598	4	127.238	3.17602	4	129.54	2.38468	5
67	-1.00592		99.1053	108.354	134.394	122.775	132.898	142.85	135.082	137.56	131.448		112.846	138.399	129.918	125.784	112.263	128.022	124.659	128.773			-1.00592	108.142	3.17305	4	135.916	3.14751	4	128.109	2.77243	4	131.293	1.98213	5
68	-0.943567		97.4491	109.14	132.688	126.818	128.695	146.146	135.787	135.855	128.967		115.543	135.123	125.14	124.695	115.11	126.432	126.533	123.942			-0.943567	109.311	4.21508	4	135.098	4.11263	4	128.569	2.43353	4	128.431	2.11634	5
69	-0.881067		95.9832	106.679	127.8	120.976	127.285	143.48	132.305	133.013	124.451		111.423	136.806	123.935	123.214	113.402	125.178	124.787	124.455			-0.881067	106.872	3.89393	4	133.316	4.20466	4	125.501	2.41061	4	126.483	1.76362	5
70	0		100	100	100	100	100	100	100	100	100		100	100	100	100	100	100	100	100			0	100	0	4	100	0	4	100	0	4	100	0	5
71	0.0624333		97.2968	98.263	95.5703	98.2746	99.3473	96.6069	101.631	98.9943	95.7689		103.146	94.8135	101.378	99.0854	98.9749	95.1066	97.7853	96.7935			0.0624333	99.4202	1.28869	4	95.5243	0.393044	4	99.767	1.00918	4	97.9979	0.721635	5
72	0.12485		99.3528	98.6352	94.1955	95.3907	95.0392	94.8619	97.7523	96.3271	95.9317		100.375	96.5878	96.9867	97.2997	100.456	91.7189	96.167	95.8957			0.12485	99.7045	0.435899	4	94.341	1.00895	4	96.5742	0.510281	4	96.0986	0.366482	5
73	0.187433		98.6674	97.4979	90.1986	95.5386	96.9452	92.7775	96.1657	95.8461	93.572		100.412	93.6761	96.2118	95.8188	98.6712	90.0878	95.1448	92.5609			0.187433	98.8121	0.600521	4	91.685	0.909137	4	95.7652	0.257571	4	94.9486	0.810712	5
74	0.249933		98.3819	96.1538	87.0163	90.0666	95.1436	91.6626	95.9894	94.8404	90.9276		98.0524	92.2202	93.7581	93.4233	97.798	87.9548	93.569	92.3472			0.249933	97.5965	0.495526	4	89.7135	1.30545	4	93.3458	1.22345	4	93.3364	0.784747	5
75	0.312433		97.8679	95.9677	85.387	90.8553	91.201	87.6878	92.0229	92.6104	90.6428		100.037	90.9008	93.8872	93.8589	98.7092	85.78	92.5894	91.7059			0.312433	98.1456	0.852306	4	87.4389	1.25861	4	92.3387	0.629875	4	92.0038	0.565458	5
76	0.3748		98.4009	94.9959	82.8666	89.1545	93.5509	87.2031	90.1278	92.9602	88.4866		98.5768	90.1274	92.5097	92.77	98.4814	85.4454	93.0579	90.3378			0.3748	97.6137	0.873366	4	86.4106	1.52573	4	91.2125	0.935414	4	91.6211	0.956809	5
77	0.437433		97.7917	95.6162	82.2811	88.7355	90.7572	84.2947	90.3041	90.6428	88.7307		99.0262	87.6251	95.9535	91.899	97.7221	84.358	89.6934	90.2095			0.437433	97.5391	0.707481	4	84.6397	1.10583	4	91.1716	1.62632	4	90.4478	0.512096	5
78	0.4998		97.8869	93.9826	81.6446	87.2566	90.2611	81.7256	87.8801	90.293	86.6558		98.3521	86.7607	92.0362	92.1603	97.9499	83.1451	92.2061	88.9269			0.4998	97.0429	1.02527	4	83.319	1.19784	4	89.8448	1.32088	4	89.6594	0.910382	5
79	0.562167		98.5532	91.8321	73.8798	85.4079	89.0339	80.6592	86.1613	88.1504	85.8421		98.839	83.212	92.3375	89.5906	98.7472	80.1757	91.9932	90.808			0.562167	96.9929	1.72128	4	79.4817	1.98251	4	88.975	1.8497	4	88.685	0.831166	5
80	0.624533		95.6787	95.5128	75.1782	83.1895	87.2846	78.2356	85.1036	88.9812	86.4931		100.787	83.8944	90.3142	92.4216	97.9119	80.5102	91.184	87.4733			0.624533	97.4725	1.23268	4	79.4546	1.83939	4	87.4478	1.95371	4	88.5308	1.05273	5
81	0.687167		96.7257	92.804	72.4287	82.3268	85.1958	77.7993	82.7677	87.2759	84.9878		99.176	83.1665	92.1223	91.0279	96.6211	79.4228	90.8859	87.5588			0.687167	96.3317	1.31574	4	78.2044	2.22916	4	87.0257	2.59944	4	87.2092	1.08851	5
82	0.7495		95.6406	95.244	71.1813	82.4747	84.4909	77.6539	80.6963	85.7892	82.5061		98.6142	83.849	89.5824	89.1551	98.5953	76.788	90.247	87.5588			0.7495	97.0235	0.916515	4	77.368	2.59321	4	85.7501	2.43546	4	85.9	1.15895	5
83	0.8119		96.3069	93.1969	70.9267	79.6155	83.812	73.049	78.052	83.6904	82.5061		96.9288	80.6642	88.9798	89.9826	96.8489	76.4952	89.0119	86.6182			0.8119	95.8204	0.885347	4	75.2838	2.12908	4	83.9148	2.95086	4	85.3219	1.34671	5
84	0.874317		97.6775	94.5823	70.1375	78.4816	82.4804	72.2734	78.0961	81.3293	81.8552		96.5543	78.6624	88.5493	89.3293	97.4184	75.9515	87.7768	86.3617			0.874317	96.5581	0.70101	4	74.2562	1.89702	4	83.226	2.85588	4	84.2712	1.54359	5
85	0.9369		93.6798	94.4376	68.8391	79.369	82.5849	69.7043	78.3164	74.8142	82.9129		97.603	77.7525	88.7215	87.108	97.9119	73.3584	86.9676	84.8226			0.9369	95.9081	1.08073	4	72.4136	2.03129	4	83.3436	2.63194	4	82.4485	2.07201	5
86	0.99925		96.1927	91.8941	66.7006	75.9921	81.1227	68.9772	75.4517	75.7761	79.4955		95.5805	78.071	88.9798	87.7178	97.2285	73.5257	86.1584	86.5755			0.99925	95.224	1.16088	4	71.8186	2.52114	4	81.6455	3.46989	4	82.1375	2.22836	5
87	1.06165		96.4211	92.4524	64.7149	77.1999	80.9138	66.3112	74.0414	73.2401	79.1701		97.3783	77.0246	86.7843	89.3728	96.4692	72.8984	84.54	86.0624			1.06165	95.6803	1.09823	4	70.2373	2.87315	4	80.6414	3.0047	4	81.7518	2.79713	5
88	1.1241		95.831	92.5558	63.4165	77.4957	80.9922	65.2933	72.9837	73.4587	79.0887		99.7378	75.5232	85.4929	86.0627	95.4442	70.8908	86.3714	84.3523			1.1241	95.8922	1.47549	4	68.781	2.75153	4	80.5859	3.22611	4	80.7909	2.20426	5
89	1.18657		94.6887	90.7361	65.224	74.7104	79.1123	62.5788	72.3667	74.4206	78.5598		99.7753	75.7962	86.9565	85.3223	95.5581	70.2217	86.414	82.7277			1.18657	95.1896	1.85401	4	68.4552	2.91524	4	80.1119	3.82677	4	80.0285	1.86754	5
90	1.2489		97.5633	92.7833	62.6018	74.2667	76.7363	62.6757	72.543	73.4587	77.7461		98.015	73.9308	86.3969	85.7578	97.3804	69.5525	83.816	82.5994			1.2489	96.4355	1.22468	4	67.1902	2.77565	4	79.2556	3.43686	4	79.2597	2.18735	5
91	1.31137		96.4782	93.7345	62.831	72.911	77.4674	62.0456	69.1494	72.934	78.1123		98.0899	71.838	85.9664	85.5401	95.3683	69.5107	83.6457	81.1885			1.31137	95.9177	0.917463	4	66.5563	2.42985	4	77.9181	4.0778	4	79.0484	2.09146	5
92	1.3738		95.4312	92.4111	61.4308	73.7737	76.9974	60.446	70.8682	69.8295	75.3051		95.3184	72.02	87.1287	84.6254	95.634	66.7503	83.7308	82.0436			1.3738	94.6987	0.765317	4	65.1618	2.67268	4	78.8754	3.89267	4	77.7602	2.59793	5
93	1.43617		95.0695	91.0877	61.2016	71.6046	76.8407	60.446	68.3561	69.1299	73.6371		96.4794	72.748	84.9763	84.3206	98.5194	67.0849	82.2402	80.8038			1.43617	95.289	1.56928	4	65.3701	2.87223	4	76.7943	4.02843	4	76.9464	2.65818	5
94	1.49852		96.0023	92.4111	59.7251	68.4496	76.4752	59.3795	67.2543	69.3922	74.6542		100.262	70.7006	83.4266	82.8833	95.3303	65.3283	83.6031	81.5306			1.49852	96.0015	1.62006	4	63.7834	2.67861	4	75.6834	4.52821	4	76.9871	2.43716	5
95	1.56087		95.4883	92.1836	59.5468	70.4708	75.6658	56.9559	66.5051	68.8675	73.1489		97.0787	71.0191	83.0392	84.1028	95.4442	65.4538	82.2402	80.9748			1.56087	95.0487	1.0279	4	63.2439	3.14305	4	75.5638	4.16788	4	76.552	2.72023	5
96	1.6233		94.1557	93.3209	59.2668	72.3687	73.9948	56.9074	64.61	66.8124	72.9862		96.1049	70.4732	82.91	82.0557	95.1405	64.701	81.8143	79.2646			1.6233	94.6805	0.603063	4	62.8371	3.0234	4	75.4258	4.31233	4	75.0228	2.64642	5
97	1.68563		95.5073	92.7626	58.3248	69.6327	75.1436	55.8895	63.4641	67.4683	73.7185		94.4944	70.1092	84.9333	83.5366	95.8618	64.1991	80.9625	79.2219			1.68563	94.6565	0.694609	4	62.1307	3.1803	4	74.7482	4.96532	4	75.8178	2.69948	5
98	1.74808		95.3741	91.5633	58.0193	68.9672	72.9243	55.3563	64.3015	65.8942	70.3011		95.6929	69.3358	81.4034	82.5784	95.634	62.6516	80.7496	77.9393			1.74808	94.5661	1.00332	4	61.3407	3.06165	4	73.8554	4.27857	4	73.9274	2.91225	5
99	1.81058		94.5174	93.0521	57.1283	69.6574	73.8903	54.2899	63.1115	64.0577	73.6371		96.2547	67.4249	80.7146	83.1882	96.0896	63.6136	79.1738	79.1364			1.81058	94.9785	0.752039	4	60.6142	2.99348	4	73.1643	4.14807	4	74.7819	3.21512	5
100	1.87293		94.2509	91.1704	56.8483	68.1292	73.1332	53.6112	61.5249	66.244	68.2669		97.6779	65.3321	80.5424	82.1429	94.2673	63.1535	79.8126	77.7683			1.87293	94.3416	1.3292	4	59.7363	2.72102	4	72.5023	4.63422	4	73.511	2.94182	5
101	1.93528		95.869	90.6121	55.4481	66.3298	72.1671	53.175	62.0097	65.3695	68.9585		95.5056	66.242	82.3074	82.1864	93.3941	60.184	78.2368	76.9987			1.93528	93.8452	1.20794	4	58.7623	2.8892	4	72.2209	4.80366	4	73.136	2.9626	5
102	1.99783		93.5275	94.1067	54.7607	66.3052	71.3316	51.6723	60.7316	63.3581	68.8771		96.6667	65.8781	81.059	79.5732	94.4571	59.1384	78.3646	79.8204			1.99783	94.6895	0.68636	4	57.8624	3.07973	4	71.6151	4.84242	4	72.5921	3.17522	5
103	2.06018		97.4872	92.3904	54.4552	66.6749	69.6606	50.7513	59.4976	62.8334	68.4296		93.8577	65.7416	79.9828	80.27	94.2293	59.9749	79.6422	77.298			2.06018	94.4911	1.07467	4	57.7308	3.27428	4	71.4494	5.04631	4	71.6983	3.14844	5
104	2.12255		92.233	93.2589	54.4552	65.2699	68.1723	50.2666	58.7924	61.9589	68.2262		95.1685	63.8763	81.7047	79.1812	94.0015	60.9368	76.7036	77.469			2.12255	93.6655	0.618425	4	57.3837	3.08231	4	70.6176	5.23128	4	71.0015	3.211	5
105	2.1849		95.0124	90.7568	53.9206	65.122	69.1645	49.2002	58.0873	62.3524	66.5582		94.4195	63.0573	79.8106	79.0941	94.7988	60.6859	77.8109	77.3835			2.1849	93.7469	1.00419	4	56.716	3.16589	4	70.2077	5.18647	4	70.9105	3.19455	5
106	2.24725		93.261	91.1911	52.4185	64.9002	67.859	49.2487	57.911	62.4836	66.965		94.1199	61.7379	79.1218	78.4843	93.7358	58.9711	76.1925	76.3574			2.24725	93.0769	0.652692	4	55.5941	2.87952	4	69.5314	4.93988	4	70.4299	3.0147	5
107	2.3098		93.9844	91.6046	52.9786	63.9389	67.5196	47.8429	56.3684	60.516	67.0464		94.6816	62.1474	79.1649	79.3118	93.6978	58.2601	77.9813	74.8183			2.3098	93.4921	0.662208	4	55.3073	3.11777	4	69.3634	5.54249	4	69.8424	3.27586	5
108	2.37218		96.2117	91.4806	51.553	64.0128	65.718	49.2002	55.9277	61.2156	65.297		97.9026	61.7834	79.0788	78.2666	94.7608	57.34	76.8313	74.3908			2.37218	95.0889	1.36337	4	54.9692	2.84322	4	68.9627	5.46704	4	68.9776	3.16234	5
109	2.43457		94.6316	90.8602	51.9857	63.3966	69.0339	46.9704	55.2226	60.9532	65.9072		93.7079	61.374	79.0788	79.0941	94.6849	57.3818	76.8313	74.4335			2.43457	93.4712	0.898744	4	54.428	3.14314	4	68.6323	5.65381	4	69.8844	3.17663	5
110	2.49703		93.7179	89.6195	50.6874	61.5972	65.9269	46.9704	55.6192	59.9475	65.6631		94.9438	60.919	77.5291	78.7456	93.5839	57.6328	75.937	74.5618			2.49703	92.9663	1.15679	4	54.0524	3.18129	4	67.6706	5.38241	4	68.969	3.37959	5
111	2.55955		93.8321	91.8941	49.0326	61.0796	66.5274	45.904	55.4429	59.4228	64.4426		95.618	60.1456	77.9165	78.5279	92.9765	55.6253	74.276	74.3908			2.55955	93.5802	0.786518	4	52.6769	3.20971	4	67.1788	5.32759	4	68.6623	3.44874	5
112	2.6219		94.2509	91.1911	49.0835	61.5972	66.5535	46.1949	53.9885	58.7669	64.7681		94.3446	61.9199	76.9694	77.439	94.4951	54.6215	75.4685	73.9632			2.6219	93.5704	0.794703	4	52.9549	3.46212	4	67.0059	5.54972	4	68.2982	3.33165	5
113	2.68427		92.747	91.8528	49.8982	60.5866	65.7963	44.3044	54.253	58.4171	64.0765		96.2547	58.3712	77.2277	78.0488	92.9005	55.0397	74.4037	74.2198			2.68427	93.4387	0.966652	4	51.9034	3.07456	4	66.6178	5.49587	4	68.1117	3.54741	5
114	2.74677		94.1557	91.7494	50.331	60.3155	64.3864	44.062	52.4901	57.1928	64.9715		95.1685	57.5978	76.6251	78.7456	94.533	54.2033	74.3612	74.348			2.74677	93.9017	0.747243	4	51.5485	2.90361	4	65.9479	5.75631	4	67.9289	3.83904	5
115	2.80915		94.803	91.8114	47.7597	58.9845	64.8825	43.5773	52.0934	57.6301	63.8324		91.985	57.2793	75.9793	77.1777	93.6978	54.4124	73.2964	71.9966			2.80915	93.0743	0.716384	4	50.7572	3.11495	4	65.0884	5.71629	4	67.1038	3.39713	5
116	2.87155		94.3461	90.4673	47.5305	59.3296	62.846	44.159	52.5342	57.6738	62.0423		93.7453	57.0064	77.1416	76.4808	91.0402	52.9486	73.5094	71.1415			2.87155	92.3997	0.965285	4	50.4111	2.84785	4	65.6287	5.8152	4	66.0369	3.4001	5
117	2.93392		93.8702	92.7833	48.6507	58.8366	63.6554	43.7227	51.3442	57.4552	62.5305		91.3109	57.0064	74.6449	76.7422	94.0395	52.7813	72.1039	73.1509			2.93392	93.001	0.628349	4	50.5403	2.84139	4	64.2324	5.51967	4	66.7068	3.56777	5
118	2.99628		93.5656	89.206	47.9633	59.2556	62.1671	42.8017	50.8594	56.4932	61.3914		93.7828	57.0974	77.9595	76.3502	92.445	52.7813	74.1482	73.2364			2.99628	92.2498	1.05611	4	50.1609	3.08176	4	65.5557	6.34664	4	65.9277	3.78005	5
119	3.05875		92.4043	91.5219	48.5998	58.7873	60.3133	41.8808	49.7576	56.2309	61.5134		98.0899	56.1419	76.3668	76.2195	95.0266	52.1539	72.7002	72.4669			3.05875	94.2607	1.47751	4	49.6941	3.02588	4	64.403	6.17791	4	65.3488	3.82127	5
120	3.12118		93.6037	91.6873	47.9124	56.3224	61.9582	42.5109	49.5372	56.1871	60.7811		96.9288	58.1893	76.1946	78.2666	93.6219	51.4011	73.6371	71.6546			3.12118	93.9604	1.08859	4	50.0034	3.28471	4	63.9228	6.51713	4	65.7695	4.01274	5
121	3.18375		93.28	89.6816	45.9521	57.9985	63.0287	41.4445	50.1983	55.1377	62.2864		93.9326	56.4604	75.4197	74.2596	93.3941	51.6102	71.9761	71.6546			3.18375	92.5721	0.97395	4	48.8668	3.27586	4	63.8982	5.91954	4	65.2734	3.45082	5
122	3.24613		93.1277	91.2531	47.1741	55.8541	62.9243	40.3781	49.7135	54.1321	59.6013		96.4794	55.414	74.4727	74.6951	96.3554	50.5228	70.4855	70.7995			3.24613	94.3039	1.27906	4	48.3723	3.15639	4	62.6314	5.87868	4	64.4304	3.72542	5
123	3.30852		92.5376	90.426	45.7994	55.8294	61.671	41.0082	47.5981	55.5313	59.9268		96.1798	55.4595	74.9031	74.1725	94.4571	50.7319	71.678	71.8256			3.30852	93.4001	1.2394	4	48.2498	3.11696	4	62.5022	6.48484	4	64.6254	3.58119	5
124	3.37087		91.4525	90.8395	45.723	55.6569	60.6527	40.5235	48.5236	53.8697	60.2929		94.7191	54.1856	76.2376	73.3014	92.8626	49.9373	70.3578	71.6546			3.37087	92.4684	0.861503	4	47.5924	2.92165	4	62.694	6.40628	4	63.9543	3.69234	5
125	3.43322		91.4715	90.4053	44.5265	54.8928	60.5744	40.0873	47.0251	53.0826	59.6827		94.794	53.8672	73.9991	73.4756	93.1663	48.808	69.1227	70.8422			3.43322	92.4593	0.963731	4	46.8222	2.94682	4	61.2599	6.2402	4	63.5315	3.77537	5
126	3.4956		95.0695	91.5012	45.9012	56.2731	60.3655	39.8934	47.554	52.5142	59.3165		94.1199	52.8207	73.0951	74.7387	95.0645	48.808	70.1874	70.6285			3.4956	93.9388	0.842625	4	46.8558	2.71997	4	61.7774	5.99598	4	63.5127	4.03197	5
127	3.55798		93.242	92.1423	45.3411	54.2766	58.094	39.1663	45.9233	52.077	57.8112		94.8689	54.8226	74.6018	72.4303	92.7487	47.6788	69.2078	69.9017			3.55798	93.2505	0.584475	4	46.7522	3.23428	4	61.0024	6.61368	4	62.0628	3.88894	5
128	3.62032		92.9374	88.7097	44.9847	54.6709	59.2689	38.7785	47.0692	52.4268	57.323		94.382	53.0482	72.966	72.8223	94.6469	47.9716	69.293	68.6191			3.62032	92.669	1.37219	4	46.1957	2.98039	4	60.9998	6.09702	4	62.092	3.75414	5
129	3.6827		93.2229	91.2324	44.1701	54.2519	58.3812	37.7121	45.6589	51.0713	57.5264		92.1723	52.0018	72.1481	71.9948	93.5459	47.4279	69.6337	68.7046			3.6827	92.5434	0.526247	4	45.328	3.00406	4	60.4231	6.31385	4	61.5356	3.84912	5
130	3.74522		93.1468	89.7643	44.2974	54.8188	58.6945	38.2453	45.703	52.077	57.323		92.8464	53.0937	73.9991	72.7787	91.5718	47.4279	69.2078	67.2082			3.74522	91.8323	0.76925	4	45.766	3.09806	4	60.9322	6.50983	4	61.6163	3.70025	5
131	3.80757		92.3282	91.2324	43.9919	54.6709	58.9556	36.4033	44.513	50.4591	56.9569		94.4195	52.3658	70.5553	72.4739	93.1283	46.8005	68.7819	68.4481			3.80757	92.7771	0.671337	4	44.8904	3.32125	4	59.6303	6.16601	4	61.4587	3.98565	5
132	3.86993		94.0605	89.6402	42.9226	53.6603	58.6162	36.6457	44.7774	51.0275	55.9398		94.6067	51.0919	69.7374	72.561	94.2673	46.4659	68.7394	67.4647			3.86993	93.1437	1.17324	4	44.2815	3.04557	4	59.2286	6.06033	4	61.1218	3.91224	5
133	3.93245		91.4525	89.4334	44.1701	53.2906	56.7102	36.888	44.2486	50.3279	56.3873		93.5955	51.0464	69.8666	72.1254	92.5968	45.1694	67.7598	66.1394			3.93245	91.7696	0.893332	4	44.3185	2.90435	4	58.7914	6.08854	4	60.3381	3.8831	5
134	3.99495		92.6137	91.7287	42.2862	52.9209	57.4674	35.1915	43.3671	49.8907	57.4858		95.4682	50.9554	70.6414	69.5993	93.5839	44.8348	68.7819	68.1488			3.99495	93.3486	0.801665	4	43.317	3.26262	4	58.9278	6.53536	4	60.5184	3.68876	5
135	4.05728		93.3562	90.7155	42.8462	52.1568	57.154	35.7247	42.9264	51.4648	56.7535		94.1573	49.1356	71.158	71.8641	94.4571	44.9184	66.3543	67.9778			4.05728	93.1715	0.851017	4	43.1562	2.80152	4	58.1489	6.482	4	61.0428	3.81086	5
136	4.11967		91.9855	89.847	43.4318	51.9842	56.5274	35.2399	43.1908	50.5028	55.6143		92.8464	50.7734	70.3831	68.6411	94.3812	44.6675	67.3765	66.2676			4.11967	92.265	0.946096	4	43.5282	3.19499	4	58.2337	6.43262	4	59.5107	3.42231	5
137	4.182		94.0415	90.0331	42.4644	52.4279	56.0313	34.7067	42.1772	48.6226	54.9227		92.1723	49.4995	67.585	70.0784	92.4829	45.1276	67.0358	66.0539			4.182	92.1824	0.824934	4	42.9496	3.10679	4	57.3065	6.14413	4	59.1418	3.90842	5
138	4.24435		91.7	88.8751	42.1079	50.8504	56.5274	35.4338	42.662	48.6664	54.9634		93.7079	49.2721	69.2208	69.9477	92.6727	43.8729	64.5656	65.9684			4.24435	91.7389	1.0389	4	42.6717	2.85354	4	56.8247	6.12278	4	59.2147	3.85598	5
139	4.30692		92.8422	88.5443	41.3442	51.7131	56.8668	34.1251	41.8687	50.3279	54.6379		92.8464	47.5432	69.2639	68.9024	92.7866	43.4128	64.3952	64.7713			4.30692	91.7549	1.0703	4	41.6063	2.80696	4	56.8102	6.20388	4	59.1013	3.39188	5
140	4.36942		92.0807	90.4053	41.446	50.5792	56.3969	35.0945	40.8991	49.1474	54.109		94.7191	48.1347	67.0684	67.4652	92.1792	43.5801	64.9063	65.5408			4.36942	92.3461	0.889576	4	42.0638	2.70966	4	55.8633	6.18588	4	58.5318	3.47216	5
141	4.43183		92.1569	89.6816	41.777	51.5898	55.1175	33.6888	41.2957	46.9174	53.2954		92.3596	48.5441	68.8334	69.1638	92.8626	43.5801	64.3101	64.472			4.43183	91.7651	0.710189	4	41.8975	3.08769	4	56.5073	6.2476	4	57.7932	3.99731	5
142	4.49418		91.4144	89.0612	41.8024	51.0969	54.8042	34.3674	40.3702	48.0105	53.214		92.3596	46.9973	67.3698	68.4233	93.3941	42.1581	64.5656	63.7879			4.49418	91.5573	0.925033	4	41.3313	2.60615	4	55.8506	6.2642	4	57.648	3.7043	5
143	4.55665		93.7369	89.1646	41.3442	51.442	54.0209	33.8827	41.1194	46.655	52.8478		93.5955	46.8608	69.4791	66.507	92.9005	41.3216	63.6712	63.0184			4.55665	92.3494	1.07721	4	40.8523	2.66363	4	56.4279	6.33777	4	56.6098	3.59845	5
144	4.61905		90.8053	91.5012	40.835	51.368	54.6997	33.5919	40.3702	45.9117	53.2547		92.3596	46.7698	66.2075	67.4216	92.445	42.9109	65.8007	63.7452			4.61905	91.7777	0.387928	4	41.0269	2.76657	4	55.9366	6.23148	4	57.0066	3.84952	5
145	4.68165		91.8523	89.847	40.3259	51.1462	54.4386	32.6709	39.5769	45.3432	51.9528		92.4345	47.2247	67.8433	67.2909	92.1412	42.2836	62.4787	63.3177			4.68165	91.5687	0.586093	4	40.6263	3.02304	4	55.2613	6.28047	4	56.4687	3.9517	5
146	4.744		92.8612	89.33	40.1477	50.7271	53.9687	33.1556	39.3125	45.0809	51.1798		93.2959	46.4058	65.9062	65.4181	92.5209	41.5307	62.4361	63.1466			4.744	92.002	0.904668	4	40.31	2.7365	4	54.5955	6.04112	4	55.7588	3.78201	5
147	4.8064		91.9284	89.5988	40.0713	49.8151	53.2898	33.1556	39.4006	46.8736	51.7087		92.397	46.2693	66.2075	67.3345	92.5209	41.1543	62.2232	62.7619			4.8064	91.6113	0.682838	4	40.1626	2.69849	4	54.4116	6.10069	4	56.3937	3.75812	5
148	4.86875		92.2711	87.7378	40.6059	48.139	53.0809	32.6709	39.2684	45.1246	51.0578		92.4345	46.0874	65.3035	66.6812	93.432	41.3634	62.0102	62.3771			4.86875	91.4688	1.26987	4	40.1819	2.78187	4	53.6803	6.07519	4	55.6643	3.90776	5
149	4.9311		92.747	87.7378	40.0458	49.0017	53.342	31.9922	38.7836	45.3432	50.9357		93.3333	43.7671	65.9923	67.8136	90.4708	40.8616	61.6695	61.522			4.9311	91.0722	1.2714	4	39.1667	2.52127	4	53.8618	6.1852	4	55.7913	3.97564	5
150	6.83252		105.939	97.2911	19.1446	20.1873	20.5222	5.13815	4.58352	4.85352	4.4345		82.1723	23.9763	26.6896	25.0436	77.1071	22.3338	22.8279	22.0607			6.83252	90.6275	6.66555	4	17.6482	4.28894	4	18.5721	4.85022	4	15.3829	4.44448	5
151	6.89508		103.883	97.4152	18.279	20.5817	20.3133	4.89578	4.62759	4.72234	4.51587		80.3371	24.5223	26.2591	24.5209	76.9172	22.2919	23.8501	22.2745			6.89508	89.6383	6.53034	4	17.4973	4.39458	4	18.8296	4.87486	4	15.2694	4.39876	5
152	6.95742		103.179	96.9396	18.0244	20.3352	19.6867	4.70189	4.18687	4.32882	4.23108		79.2135	24.4768	26.6035	25.392	79.1572	22.2919	23.2538	23.7708			6.95742	89.6223	6.15895	4	17.3738	4.43134	4	18.5949	4.97045	4	15.4819	4.66674	5
153	7.0198		100.381	97.1257	18.5081	20.2859	19.8695	4.31411	4.01058	4.28509	4.31245		80.5993	25.7507	27.3353	25.6098	77.0311	22.0828	22.7853	23.6426			7.0198	88.7842	5.83943	4	17.6639	4.68911	4	18.6043	5.07869	4	15.5439	4.68256	5
154	7.08217		102.608	98.4491	17.6935	20.0148	19.9478	4.31411	3.96651	4.32882	4.14972		79.2509	24.8863	27.7658	26.3502	80.0683	23.3793	24.063	23.5571			7.08217	90.0941	6.08615	4	17.5683	4.68161	4	18.9525	5.24008	4	15.6667	4.77447	5
155	7.1445		102.57	96.3813	18.0499	20.4585	19.3211	4.31411	4.01058	4.15391	3.90561		79.8127	25.7052	27.9811	27.047	76.082	21.6646	23.6371	23.4288			7.1445	88.7115	6.38733	4	17.4334	4.64418	4	19.0218	5.23586	4	15.5713	4.86795	5
156	7.20703		101.314	96.7122	17.7189	20.5324	19.2689	4.07174	3.96651	4.11019	3.9463		80.8989	25.9782	28.2824	26.4373	78.3979	22.0828	23.5945	23.3861			7.20703	89.3306	5.69134	4	17.4629	4.77181	4	19.094	5.28829	4	15.4298	4.79171	5
157	7.26955		100	95.7816	17.5407	19.8422	19.6345	4.07174	3.96651	4.02274	3.9463		80.3745	26.8881	28.1963	27.5261	77.183	22.7938	22.2317	23.1723			7.26955	88.3348	5.62184	4	17.8236	4.96707	4	18.5592	5.17167	4	15.6604	4.92784	5
158	7.33197		104.34	96.9396	18.1008	20.7296	19.5039	3.97479	3.96651	4.02274	3.9463		78.0899	27.0701	28.6268	26.7857	78.0182	22.8356	23.4668	23.044			7.33197	89.347	6.69274	4	17.9953	5.01968	4	19.1974	5.33439	4	15.4605	4.82452	5
159	7.39432		101.314	98.139	17.7444	20.3845	19.9478	3.87785	3.74614	3.89156	3.78356		79.6629	26.0237	28.7129	26.6115	77.7904	22.7102	23.339	22.873			7.39432	89.2265	6.10855	4	17.589	4.87673	4	19.0456	5.38327	4	15.4215	4.84567	5
160	7.45672		102.798	97.7047	17.4134	19.8422	19.5561	3.7809	3.52578	3.97901	3.82425		79.1011	27.2066	28.2824	27.0906	77.0311	22.7938	23.0835	23.8136			7.45672	89.1588	6.50198	4	17.7987	5.08352	4	18.6835	5.3432	4	15.6527	4.94393	5
			Mn (uM) / Nb6196 (nM)										Mn (uM) / Nb6196 (nM)
			0/0	0/0	50/0	50/50	50/250	50/0	50/50	50/250	50/250		0/0	50/0	50/50	50/250	0/0	50/0	50/50	50/250
			6879	6172	5998	5772	5639	3829	3761	3965	3912		3222	3208	3154	3128	3254	3163	3196	3156
			6608	6042	5830	5726	5396	3773	3803	3923	3885		3192	3079	3090	3111	3147	3081	3053	3129
			6603	6090	5777	5731	5416	3704	3795	3957	3444		3102	2945	2982	3030	3098	3089	3028	2995
			6461	5878	5753	5579	5331	3681	3780	3811	3305		3076	2946	2990	2888	3088	3060	3022	2993
			6369	5583	5687	5372	5237	3615	3732	3780	3389		2997	2884	2986	2836	3084	3030	3001	2966
			6250	5603	5430	5404	5154	3612	3623	3666	3343		2981	2886	2932	2874	2964	2912	2986	2998
			6078	5579	5503	5350	5215	3570	3633	3683	3352		2938	2849	2960	2846	2917	2917	2943	2927
			6167	5559	5501	5294	5107	3462	3527	3582	3296		2902	2896	2879	2770	2884	2891	2942	2903
			6029	5510	5446	5226	5078	3498	3524	3554	3368		2944	2908	2750	2800	2874	2900	2863	2851
			6040	5418	5347	5306	5113	3431	3431	3459	3364		2904	2888	2775	2828	2823	2818	2852	2793
			6038	5278	5196	5153	4946	3429	3453	3485	3275		2918	2787	2772	2811	2809	2748	2781	2726
			5966	5275	5217	5111	5047	3391	3408	3455	3271		2827	2772	2687	2678	2755	2785	2790	2745
			5929	5223	5157	5113	5103	3394	3382	3407	3265		2799	2742	2645	2610	2719	2835	2738	2653
			5870	5268	5180	5118	4969	3297	3357	3419	3292		2748	2760	2648	2622	2747	2697	2686	2619
			5781	5172	5258	5150	4908	3257	3296	3433	3285		2754	2678	2644	2526	2749	2671	2672	2660
			5700	5111	5187	4967	4942	3277	3309	3340	3252		2658	2657	2662	2525	2689	2683	2664	2586
			5716	5247	5254	5125	4949	3273	3301	3350	3208		2710	2695	2640	2521	2647	2647	2644	2558
			5712	5152	5207	5115	4937	3201	3250	3299	3204		2760	2633	2594	2495	2639	2585	2576	2587
			5764	5062	5282	4993	4952	3266	3227	3288	3166		2691	2654	2570	2552	2678	2601	2664	2580
			5676	5078	5161	5011	4905	3255	3207	3294	3172		2635	2630	2582	2538	2584	2597	2638	2525
			5642	5069	5044	4984	4853	3271	3225	3275	3194		2640	2640	2638	2573	2629	2605	2625	2545
			5586	5113	5093	4918	4830	3234	3202	3247	3177		2727	2614	2554	2497	2617	2616	2589	2596
			5704	5073	5206	4923	4811	3208	3200	3289	3139		2628	2632	2537	2468	2695	2581	2552	2541
			5592	5052	5109	4907	4809	3207	3172	3262	3185		2615	2542	2500	2516	2644	2601	2564	2552
			5479	5171	5059	4791	4774	3121	3143	3215	3173		2646	2615	2539	2564	2596	2544	2579	2558
			5558	5077	5135	4815	4786	3178	3142	3184	3163		2662	2544	2538	2492	2560	2593	2618	2585
			5485	5087	5061	4905	4723	3149	3164	3236	3177		2593	2546	2526	2492	2605	2509	2530	2551
			5448	4989	5117	4802	4696	3102	3105	3242	3202		2581	2580	2452	2492	2587	2525	2559	2521
			5491	4968	5048	4897	4747	3170	3168	3207	3182		2599	2564	2505	2506	2571	2547	2547	2498
			5360	5138	5115	4927	4802	3100	3143	3181	3253		2585	2532	2452	2461	2571	2546	2520	2496
			5347	5099	5173	4859	4734	3053	3131	3137	3136		2601	2573	2499	2488	2569	2533	2539	2521
			5479	5090	4962	4867	4730	3114	3037	3147	3127		2590	2548	2500	2455	2544	2547	2518	2519
			5428	5040	4983	4837	4627	3079	3117	3132	3144		2591	2608	2515	2502	2518	2548	2494	2476
			5438	5013	5066	4894	4716	3061	3089	3180	3153		2605	2524	2507	2463	2545	2482	2492	2443
			5391	5086	4965	4716	4725	3087	3084	3155	3173		2551	2548	2461	2451	2525	2538	2537	2450
			5331	5167	5022	4765	4674	2979	2986	3065	3156		2516	2535	2435	2425	2525	2505	2526	2457
			5273	5133	4990	4865	4778	3061	3090	3140	3108		2547	2507	2459	2444	2536	2508	2472	2525
			5357	4998	4903	4758	4622	3025	3037	3122	3184		2532	2535	2508	2444	2548	2486	2482	2482
			5376	4919	4899	4810	4747	3082	3111	3065	3194		2510	2456	2434	2424	2529	2500	2450	2419
			5331	4932	4892	4866	4726	2987	3064	3093	3160		2522	2575	2457	2469	2507	2488	2475	2488
			5304	4936	4952	4732	4665	3005	3056	3044	3180		2481	2552	2478	2471	2550	2519	2513	2428
			5334	4944	4905	4727	4755	3003	3035	3172	3121		2487	2519	2459	2475	2548	2499	2454	2444
			5235	4913	5057	4831	4692	3017	2968	3076	3218		2506	2507	2495	2451	2490	2474	2455	2443
			5366	4911	4971	4747	4596	2990	3000	3128	3176		2493	2534	2480	2464	2505	2476	2464	2430
			5304	4903	4831	4879	4684	2949	2917	3098	3123		2482	2489	2447	2423	2483	2448	2432	2430
			5367	5004	4897	4932	4827	2985	2990	3089	3102		2494	2480	2449	2371	2466	2479	2487	2481
			5257	4983	4921	4858	4613	3025	2974	3064	3106		2561	2511	2459	2444	2462	2455	2480	2417
			5321	5007	4993	4761	4674	2936	3054	2979	3116		2504	2502	2417	2429	2471	2448	2461	2404
			5217	4991	4916	4826	4640	2992	2992	3044	3031		2529	2496	2442	2460	2480	2451	2412	2463
			5286	5314	5245	5008	5232	3182	3302	3278	3313		3060	3065	3047	2948	3112	3061	2998	3023
			5121	5253	5263	5107	5141	3184	3165	3233	3342		3073	3033	2991	2921	3129	3049	3019	3058
			5175	5258	5225	5058	5218	3140	3231	3265	3305		3146	2970	3024	2973	3036	3079	3034	2980
			5291	5307	5157	5011	5223	3148	3136	3147	3296		3131	2954	2958	2915	3041	3045	2966	2908
			5169	5274	5433	5013	5294	3077	3194	3212	3208		3087	3067	2987	2876	3044	3035	2990	2934
			5203	5332	5259	5058	5114	3080	3210	3189	3272		3075	2979	3028	2856	3002	3014	2978	2949
			5124	5352	5271	5070	5133	3125	3208	3156	3258		3053	2953	2920	2867	3020	2982	2970	2908
			5144	5162	5278	5056	4992	3114	3215	3200	3133		3033	2926	2918	2878	2939	3048	2985	2943
			5093	5263	5131	5010	5068	3141	3205	3137	3165		3093	2994	2899	2857	3030	3041	2924	2945
			5104	5246	5149	5105	5163	3128	3197	3203	3155		3037	2982	2919	2973	3009	3029	2971	2961
			5241	5246	5337	5023	5067	3096	3182	3189	3158		3029	2992	2938	2872	3007	2981	2941	2938
			5166	5279	5136	5053	5059	3065	3143	3135	3122		3060	2930	2967	2866	3016	2987	2931	2902
			5087	5211	5323	5046	4964	3032	3088	3116	3091		3047	3004	2921	2909	3016	3027	2900	2904
			5155	5176	5208	4929	5077	3009	3077	3078	3138		3040	3039	2933	2856	3018	3017	2917	2938
			5094	5404	5193	4886	4964	3015	3105	3104	3157		3084	2974	2937	2860	3002	2995	2973	2912
			5077	5208	5138	4934	5049	2995	3126	3104	3089		3031	3000	2919	2842	2989	2977	2946	2889
			5074	5173	5187	4957	4989	2959	3096	3166	3114		3005	3018	2931	2868	3013	3048	2915	2980
			5206	5240	5279	4981	5090	2947	3065	3146	3231		3013	3042	3018	2888	2957	3061	2927	3012
			5119	5278	5212	5145	4929	3015	3081	3107	3170		3085	2970	2907	2863	3032	3023	2971	2899
			5042	5159	5020	4908	4875	2960	3002	3042	3059		2975	3007	2879	2829	2987	2993	2930	2911
			5253	4836	3928	4057	3830	2063	2269	2287	2458		2670	2198	2323	2296	2634	2391	2348	2339
			5111	4752	3754	3987	3805	1993	2306	2264	2354		2754	2084	2355	2275	2607	2274	2296	2264
			5219	4770	3700	3870	3640	1957	2218	2203	2358		2680	2123	2253	2234	2646	2193	2258	2243
			5183	4715	3543	3876	3713	1914	2182	2192	2300		2681	2059	2235	2200	2599	2154	2234	2165
			5168	4650	3418	3654	3644	1891	2178	2169	2235		2618	2027	2178	2145	2576	2103	2197	2160
			5141	4641	3354	3686	3493	1809	2088	2118	2228		2671	1998	2181	2155	2600	2051	2174	2145
			5169	4594	3255	3617	3583	1799	2045	2126	2175		2632	1981	2149	2130	2594	2043	2185	2113
			5137	4624	3232	3600	3476	1739	2049	2073	2181		2644	1926	2229	2110	2574	2017	2106	2110
			5142	4545	3207	3540	3457	1686	1994	2065	2130		2626	1907	2138	2116	2580	1988	2165	2080
			5177	4441	2902	3465	3410	1664	1955	2016	2110		2639	1829	2145	2057	2601	1917	2160	2124
			5026	4619	2953	3375	3343	1614	1931	2035	2126		2691	1844	2098	2122	2579	1925	2141	2046
			5081	4488	2845	3340	3263	1605	1878	1996	2089		2648	1828	2140	2090	2545	1899	2134	2048
			5024	4606	2796	3346	3236	1602	1831	1962	2028		2633	1843	2081	2047	2597	1836	2119	2048
			5059	4507	2786	3230	3210	1507	1771	1914	2028		2588	1773	2067	2066	2551	1829	2090	2026
			5131	4574	2755	3184	3159	1491	1772	1860	2012		2578	1729	2057	2051	2566	1816	2061	2020
			4921	4567	2704	3220	3163	1438	1777	1711	2038		2606	1709	2061	2000	2579	1754	2042	1984
			5053	4444	2620	3083	3107	1423	1712	1733	1954		2552	1716	2067	2014	2561	1758	2023	2025
			5065	4471	2542	3132	3099	1368	1680	1675	1946		2600	1693	2016	2052	2541	1743	1985	2013
			5034	4476	2491	3144	3102	1347	1656	1680	1944		2663	1660	1986	1976	2514	1695	2028	1973
			4974	4388	2562	3031	3030	1291	1642	1702	1931		2664	1666	2020	1959	2517	1679	2029	1935
			5125	4487	2459	3013	2939	1293	1646	1680	1911		2617	1625	2007	1969	2565	1663	1968	1932
			5068	4533	2468	2958	2967	1280	1569	1668	1920		2619	1579	1997	1964	2512	1662	1964	1899
			5013	4469	2413	2993	2949	1247	1608	1597	1851		2545	1583	2024	1943	2519	1596	1966	1919
			4994	4405	2404	2905	2943	1247	1551	1581	1810		2576	1599	1974	1936	2595	1604	1931	1890
			5043	4469	2346	2777	2929	1225	1526	1587	1835		2677	1554	1938	1903	2511	1562	1963	1907
			5016	4458	2339	2859	2898	1175	1509	1575	1798		2592	1561	1929	1931	2514	1565	1931	1894
			4946	4513	2328	2936	2834	1174	1466	1528	1794		2566	1549	1926	1884	2506	1547	1921	1854
			5017	4486	2291	2825	2878	1153	1440	1543	1812		2523	1541	1973	1918	2525	1535	1901	1853
			5010	4428	2279	2798	2793	1142	1459	1507	1728		2555	1524	1891	1896	2519	1498	1896	1823
			4965	4500	2244	2826	2830	1120	1432	1465	1810		2570	1482	1875	1910	2531	1521	1859	1851
			4951	4409	2233	2764	2801	1106	1396	1515	1678		2608	1436	1871	1886	2483	1510	1874	1819
			5036	4382	2178	2691	2764	1097	1407	1495	1695		2550	1456	1912	1887	2460	1439	1837	1801
			4913	4551	2151	2690	2732	1066	1378	1449	1693		2581	1448	1883	1827	2488	1414	1840	1867
			5121	4468	2139	2705	2668	1047	1350	1437	1682		2506	1445	1858	1843	2482	1434	1870	1808
			4845	4510	2139	2648	2611	1037	1334	1417	1677		2541	1404	1898	1818	2476	1457	1801	1812
			4991	4389	2118	2642	2649	1015	1318	1426	1636		2521	1386	1854	1816	2497	1451	1827	1810
			4899	4410	2059	2633	2599	1016	1314	1429	1646		2513	1357	1838	1802	2469	1410	1789	1786
			4937	4430	2081	2594	2586	987	1279	1384	1648		2528	1366	1839	1821	2468	1393	1831	1750
			5054	4424	2025	2597	2517	1015	1269	1400	1605		2614	1358	1837	1797	2496	1371	1804	1740
			4971	4394	2042	2572	2644	969	1253	1394	1620		2502	1349	1837	1816	2494	1372	1804	1741
			4923	4334	1991	2499	2525	969	1262	1371	1614		2535	1339	1801	1808	2465	1378	1783	1744
			4929	4444	1926	2478	2548	947	1258	1359	1584		2553	1322	1810	1803	2449	1330	1744	1740
			4951	4410	1928	2499	2549	953	1225	1344	1592		2519	1361	1788	1778	2489	1306	1772	1730
			4872	4442	1960	2458	2520	914	1231	1336	1575		2570	1283	1794	1792	2447	1316	1747	1736
			4946	4437	1977	2447	2466	909	1191	1308	1597		2541	1266	1780	1808	2490	1296	1746	1739
			4980	4440	1876	2393	2485	899	1182	1318	1569		2456	1259	1765	1772	2468	1301	1721	1684
			4956	4375	1867	2407	2407	911	1192	1319	1525		2503	1253	1792	1756	2398	1266	1726	1664
			4931	4487	1911	2387	2438	902	1165	1314	1537		2438	1253	1734	1762	2477	1262	1693	1711
			4915	4314	1884	2404	2381	883	1154	1292	1509		2504	1255	1811	1753	2435	1262	1741	1713
			4854	4426	1909	2385	2310	864	1129	1286	1512		2619	1234	1774	1750	2503	1247	1707	1695
			4917	4434	1882	2285	2373	877	1124	1285	1494		2588	1279	1770	1797	2466	1229	1729	1676
			4900	4337	1805	2353	2414	855	1139	1261	1531		2508	1241	1752	1705	2460	1234	1690	1676
			4892	4413	1853	2266	2410	833	1128	1238	1465		2576	1218	1730	1715	2538	1208	1655	1656
			4861	4373	1799	2265	2362	846	1080	1270	1473		2568	1219	1740	1703	2488	1213	1683	1680
			4804	4393	1796	2258	2323	836	1101	1232	1482		2529	1191	1771	1683	2446	1194	1652	1676
			4805	4372	1749	2227	2320	827	1067	1214	1467		2531	1184	1719	1687	2454	1167	1623	1657
			4994	4425	1803	2283	2312	823	1079	1201	1458		2513	1161	1698	1716	2504	1167	1648	1652
			4898	4456	1781	2202	2225	808	1042	1191	1421		2533	1205	1733	1663	2443	1140	1625	1635
			4882	4290	1767	2218	2270	800	1068	1199	1409		2520	1166	1695	1672	2493	1147	1627	1605
			4897	4412	1735	2201	2236	778	1036	1168	1414		2461	1143	1676	1653	2464	1134	1635	1607
			4893	4341	1740	2224	2248	789	1037	1191	1409		2479	1167	1719	1671	2412	1134	1625	1572
			4850	4412	1728	2218	2258	751	1010	1154	1400		2521	1151	1639	1664	2453	1119	1615	1601
			4941	4335	1686	2177	2245	756	1016	1167	1375		2526	1123	1620	1666	2483	1111	1614	1578
			4804	4325	1735	2162	2172	761	1004	1151	1386		2499	1122	1623	1656	2439	1080	1591	1547
			4865	4436	1661	2147	2201	726	984	1141	1413		2549	1120	1641	1598	2465	1072	1615	1594
			4904	4387	1683	2116	2189	737	974	1177	1395		2514	1080	1653	1650	2488	1074	1558	1590
			4832	4345	1706	2109	2165	727	980	1155	1367		2479	1116	1635	1576	2486	1068	1582	1550
			4940	4354	1668	2127	2146	716	957	1112	1350		2461	1088	1570	1609	2436	1079	1574	1545
			4817	4298	1654	2063	2165	731	968	1113	1351		2502	1083	1608	1606	2441	1049	1516	1543
			4877	4282	1624	2098	2178	704	950	1151	1343		2479	1045	1609	1582	2444	1038	1512	1515
			4837	4372	1628	2052	2160	724	928	1124	1330		2529	1058	1558	1549	2428	1042	1524	1533
			4841	4337	1641	2093	2111	695	937	1073	1310		2466	1067	1599	1588	2446	1042	1510	1508
			4802	4307	1642	2073	2099	709	916	1098	1308		2466	1033	1565	1571	2460	1008	1516	1492
			4924	4312	1624	2087	2069	699	933	1067	1299		2499	1030	1614	1527	2447	988	1495	1474
			4770	4425	1604	2084	2095	693	916	1050	1309		2466	1028	1538	1548	2435	1026	1545	1491
			4825	4345	1584	2075	2085	674	898	1037	1277		2468	1038	1576	1545	2427	1011	1467	1481
			4878	4320	1577	2058	2067	684	892	1031	1258		2491	1020	1531	1502	2437	993	1466	1477
			4829	4333	1574	2021	2041	684	894	1072	1271		2467	1017	1538	1546	2437	984	1461	1468
			4847	4243	1595	1953	2033	674	891	1032	1255		2468	1013	1517	1531	2461	989	1456	1459
			4872	4243	1573	1988	2043	660	880	1037	1252		2492	962	1533	1557	2383	977	1448	1439
			5565	4705	752	819	786	106	104	111	109		2194	527	620	575	2031	534	536	516
			5457	4711	718	835	778	101	105	108	111		2145	539	610	563	2026	533	560	521
			5420	4688	708	825	754	97	95	99	104		2115	538	618	583	2085	533	546	556
			5273	4697	727	823	761	89	91	98	106		2152	566	635	588	2029	528	535	553
			5390	4761	695	812	764	89	90	99	102		2116	547	645	605	2109	559	565	551
			5388	4661	709	830	740	89	91	95	96		2131	565	650	621	2004	518	555	548
			5322	4677	696	833	738	84	90	94	97		2160	571	657	607	2065	528	554	547
			5253	4632	689	805	752	84	90	92	97		2146	591	655	632	2033	545	522	542
			5481	4688	711	841	747	82	90	92	97		2085	595	665	615	2055	546	551	539
			5322	4746	697	827	764	80	85	89	93		2127	572	667	611	2049	543	548	535
			5400	4725	684	805	749	78	80	91	94		2112	598	657	622	2029	545	542	557
