# Supplementary material for: Structural and functional properties of a plant NRAMP-related aluminum transporter
Source: eLife journal article supplement (doi:10.7554/elife.85641), 2023-04-05
Supplement: fig5-data1 [file Figure5.xlsx]

## Sheet: Figure5B
SiNRAT1-D66A
LPR50
Mn
																		Condition
			Mn Concentrations															Mean	SEM	N
Cycle Nr.	Time (min)		0	50	400	0	50	400	0	50	400	0	50	400			Time (min)	0 µM Mn2+			50 μM Mn2+			400 μM Mn2+
1	-6.95145		128.855	135.887	137.272	118.131	123.447	126.578	138.633	152.208	145.025	109.914	123.023	128.225			-6.95145	123.883	6.26164	4	133.641	6.87043	4	134.275	4.28547	4
2	-6.8828		127.716	136.659	136.989	119.474	120.836	126.037	135.791	152.53	145.797	109.397	121.741	125.846			-6.8828	123.094	5.65166	4	132.941	7.46951	4	133.668	4.80937	4
3	-6.81432		126.752	134.857	138.215	117.348	122.519	122.67	140.857	152.438	144.616	109.914	121.476	129.597			-6.81432	123.718	6.67134	4	132.822	7.21002	4	133.775	4.81334	4
4	-6.74607		125.935	134.084	137.932	122.272	120.139	126.218	138.468	153.082	144.889	111.81	124.613	124.84			-6.74607	124.621	5.50071	4	132.98	7.30406	4	133.47	4.80773	4
5	-6.67755		125.613	135.05	135.324	119.53	121.416	126.458	137.685	150.506	144.707	110.388	121.476	127.768			-6.67755	123.304	5.72439	4	132.112	6.91917	4	133.564	4.19676	4
6	-6.60903		128.096	133.215	137.995	115.389	120.371	126.278	136.903	149.724	143.707	110.431	120.769	126.212			-6.60903	122.705	6.01951	4	131.02	6.91096	4	133.548	4.37471	4
7	-6.54027		129.089	134.857	130.17	117.403	118.746	125.015	135.42	147.148	145.298	109.052	122.492	124.84			-6.54027	122.741	5.89449	4	130.811	6.44221	4	131.331	4.81699	4
8	-6.47202		127.833	133.28	133.03	117.571	125.189	123.512	135.008	148.528	142.617	109.267	120.46	125.389			-6.47202	122.42	5.65883	4	131.864	6.15303	4	131.137	4.3451	4
9	-6.40323		125.643	133.473	134.444	117.348	117.702	122.91	133.278	145.998	143.48	109.267	117.985	125.526			-6.40323	121.384	5.18589	4	128.789	6.81756	4	131.59	4.66929	4
10	-6.33487		126.548	133.344	133.878	117.403	118.456	122.369	135.214	146.366	142.526	107.457	119.046	122.141			-6.33487	121.656	5.96834	4	129.303	6.64799	4	130.229	4.93059	4
11	-6.26633		124.299	133.119	132.432	118.075	120.894	123.391	132.166	146.32	140.118	105.733	117.897	121.5			-6.26633	120.068	5.5808	4	129.557	6.48526	4	129.361	4.30669	4
12	-6.19777		126.489	130.64	131.364	117.739	117.992	122.189	131.631	145.446	141.935	108.578	116.438	120.448			-6.19777	121.109	5.06667	4	127.629	6.73687	4	128.984	4.93658	4
13	-6.12923		125.613	130.995	132.275	117.907	117.005	124.594	131.919	145.492	141.027	106.121	116.836	121.272			-6.12923	120.39	5.55267	4	127.582	6.82986	4	129.792	4.39698	4
14	-6.06095		123.803	131.638	127.216	114.55	117.353	124.293	131.672	145.722	140.8	105.56	116.792	120.769			-6.06095	118.896	5.65714	4	127.876	6.86914	4	128.269	4.37977	4
15	-5.99238		125.321	129.707	131.364	117.403	117.121	122.309	131.384	144.388	140.254	105.819	115.996	118.344			-5.99238	119.982	5.5208	4	126.803	6.63444	4	128.068	4.89125	4
16	-5.92413		125.73	131.96	128.158	114.605	115.264	121.768	131.96	144.756	140.754	105.431	116.571	119.488			-5.92413	119.432	5.8875	4	127.138	6.98991	4	127.542	4.77106	4
17	-5.85558		127.19	126.939	127.058	115.053	116.947	122.67	128.583	142.732	142.572	105.56	115.643	121.226			-5.85558	119.097	5.43971	4	125.565	6.25378	4	128.381	4.88989	4
18	-5.7872		123.978	128.516	130.578	115.445	116.251	120.024	128.007	141.398	137.21	106.121	114.494	119.716			-5.7872	118.388	4.85551	4	125.165	6.24557	4	126.882	4.26922	4
19	-5.71838		123.481	128.87	128.881	115.389	118.282	121.648	127.965	143.146	137.528	105.56	115.599	119.716			-5.71838	118.099	4.9234	4	126.474	6.25223	4	126.943	4.0422	4
20	-5.64983		124.854	126.843	130.484	115.725	115.496	121.708	128.377	140.11	136.302	103.966	116.483	119.579			-5.64983	118.23	5.45128	4	124.733	5.73225	4	127.018	3.89161	4
21	-5.58125		125.292	125.362	126.21	115.781	114.568	123.331	128.171	139.696	136.393	105.56	115.378	118.527			-5.58125	118.701	5.11807	4	123.751	5.85446	4	126.115	3.77451	4
22	-5.51273		123.744	124.976	128.001	116.284	115.09	121.046	128.295	140.8	135.484	105.345	116.527	117.063			-5.51273	118.417	5.01151	4	124.348	5.90169	4	125.399	4.05083	4
23	-5.44448		125.175	126.392	128.253	115.389	115.322	120.746	128.789	138.362	136.665	104.181	115.599	118.984			-5.44448	118.384	5.51575	4	123.919	5.46094	4	126.162	4.03674	4
24	-5.37595		123.744	124.01	123.79	116.172	112.885	118.821	127.018	139.098	135.938	105.043	115.157	118.664			-5.37595	117.994	4.87804	4	122.788	5.94304	4	124.303	4.05673	4
25	-5.30743		124.124	124.654	126.838	112.927	112.13	115.454	128.83	137.489	134.711	105.517	115.245	120.082			-5.30743	117.85	5.29358	4	122.379	5.69653	4	124.272	4.19206	4
26	-5.23892		121.291	125.33	127.718	114.829	112.71	120.445	125.659	136.155	133.53	103.621	114.848	117.475			-5.23892	116.35	4.79077	4	122.261	5.38999	4	124.792	3.62121	4
27	-5.17002		124.241	124.718	127.53	115.613	113.523	118.16	126.03	135.925	133.348	104.914	113.566	118.344			-5.17002	117.699	4.83053	4	121.933	5.35613	4	124.346	3.71341	4
28	-5.10175		122.488	123.334	124.67	112.983	112.826	119.603	122.941	134.867	133.303	106.466	116.438	116.057			-5.10175	116.219	3.98005	4	121.866	4.85063	4	123.408	3.74191	4
29	-5.03327		121.232	122.272	125.11	112.759	116.541	119.483	124.712	135.879	134.03	105.172	114.582	117.704			-5.03327	115.969	4.38759	4	122.319	4.80543	4	124.082	3.67259	4
30	-4.96475		119.947	122.594	124.387	113.095	112.362	115.634	122.035	135.051	134.393	105.216	113.654	116.834			-4.96475	115.073	3.80031	4	120.915	5.23212	4	122.812	4.31916	4
31	-4.89597		119.451	122.594	123.947	111.416	114.568	117.078	126.194	135.327	130.395	103.966	114.406	115.782			-4.89597	115.257	4.82587	4	121.724	4.9207	4	121.801	3.3789	4
32	-4.82742		121.758	121.307	123.004	111.752	111.84	116.176	120.758	134.315	129.169	104.741	114.715	116.102			-4.82742	114.752	4.02463	4	120.544	4.9996	4	121.113	3.13519	4
33	-4.75873		122.05	120.406	121.873	111.863	112.71	118.1	124.217	134.039	130.577	105.733	114.361	114.776			-4.75873	115.966	4.34601	4	120.379	4.84427	4	121.331	3.4058	4
34	-4.6901		120.473	121.983	122.062	109.401	111.608	115.274	120.799	133.487	130.713	104.052	113.92	114.776			-4.6901	113.681	4.16172	4	120.249	4.94112	4	120.706	3.72673	4
35	-4.62162		121.641	120.084	119.045	112.199	110.969	116.115	121.499	133.395	127.033	105.517	112.152	114.318			-4.62162	115.214	3.91506	4	119.15	5.1614	4	119.128	2.80931	4
36	-4.55308		123.102	117.799	121.276	112.367	110.969	114.853	126.565	134.683	130.441	106.121	114.008	115.233			-4.55308	117.039	4.73055	4	119.365	5.29363	4	120.451	3.64051	4
37	-4.4844		119.159	117.831	122.47	111.08	111.84	114.191	119.934	131.831	125.716	103.147	113.036	115.508			-4.4844	113.33	3.94075	4	118.634	4.5853	4	119.471	2.76244	4
38	-4.41588		120.269	117.026	121.747	111.64	110.563	112.748	121.829	132.107	126.579	104.31	111.268	116.651			-4.41588	114.512	4.07225	4	117.741	5.00254	4	119.431	3.01171	4
39	-4.34737		119.013	116.897	117.945	111.08	109.46	111.545	119.728	132.107	127.488	103.75	112.947	116.606			-4.34737	113.393	3.76448	4	117.853	4.9882	4	118.396	3.3291	4
40	-4.27887		121.291	118.668	121.653	111.472	111.724	114.011	119.399	131.187	125.716	104.569	112.417	115.371			-4.27887	114.183	3.84606	4	118.499	4.50835	4	119.187	2.73956	4
41	-4.21035		120.298	117.444	120.207	112.759	108.822	112.207	122.652	129.209	127.215	105.819	112.461	114.959			-4.21035	115.382	3.82271	4	116.984	4.4416	4	118.647	3.30305	4
42	-4.14183		118.779	118.153	117.788	108.618	109.634	112.387	118.74	129.761	125.034	105.388	112.108	114.593			-4.14183	112.881	3.45729	4	117.414	4.48764	4	117.45	2.76023	4
43	-4.07332		117.377	117.766	117.725	109.905	108.59	111.124	119.646	129.715	125.852	104.009	112.285	113.861			-4.07332	112.734	3.57619	4	117.089	4.61149	4	117.141	3.20388	4
44	-4.0048		119.655	115.546	118.887	109.737	108.938	111.485	119.646	130.267	126.533	104.914	110.34	113.998			-4.0048	113.488	3.69168	4	116.273	4.87644	4	117.726	3.31364	4
45	-3.93628		120.239	115.996	117.379	115.501	110.273	112.508	118.245	128.059	122.899	103.793	111.533	113.541			-3.93628	114.445	3.68101	4	116.465	4.05486	4	116.581	2.35207	4
46	-3.86777		119.363	114.934	119.359	109.569	109.518	108.779	116.351	125.161	124.625	103.491	112.064	111.574			-3.86777	112.194	3.55087	4	115.419	3.43049	4	116.084	3.62145	4
47	-3.79925		119.509	115.385	117.693	107.275	106.849	113.349	118.451	126.311	123.898	104.181	113.92	113.907			-3.79925	112.354	3.88343	4	115.616	4.02266	4	117.212	2.42868	4
48	-3.73075		118.808	116.543	117.002	109.849	108.299	114.251	116.269	128.105	126.17	105.086	111.754	114.73			-3.73075	112.503	3.109	4	116.175	4.32073	4	118.038	2.77612	4
49	-3.66225		117.728	115.192	116.405	109.401	109.228	109.982	118.204	128.795	122.853	104.569	112.196	113.586			-3.66225	112.476	3.32127	4	116.353	4.32233	4	115.707	2.72071	4
50	-2.4439		102.336	111.007	111.691	106.547	111.143	113.53	113.262	119.089	118.401	109.009	113.654	115.005			-2.4439	107.789	2.28606	4	113.724	1.88922	4	114.656	1.42024	4
51	-2.37565		102.044	111.619	109.648	104.197	111.724	116.236	111.985	115.915	118.355	110.56	111.798	113.815			-2.37565	107.197	2.41157	4	112.764	1.05107	4	114.514	1.86829	4
52	-2.30713		101.694	111.683	108.171	107.834	110.505	114.311	109.679	116.145	115.72	110.216	110.208	114.273			-2.30713	107.356	1.95491	4	112.135	1.37414	4	113.119	1.68328	4
53	-2.23863		102.862	110.364	108.422	105.596	114.626	113.951	110.667	116.973	116.447	109.957	111.091	112.306			-2.23863	107.271	1.84825	4	113.264	1.5477	4	112.781	1.68404	4
54	-2.17012		101.869	109.559	107.48	104.645	107.893	111.606	111.409	116.651	115.357	109.224	110.65	113.175			-2.17012	106.787	2.16165	4	111.188	1.90715	4	111.904	1.66334	4
55	-2.1016		102.716	108.819	109.774	106.1	107.371	112.147	110.791	116.145	114.357	108.448	111.312	111.299			-2.1016	107.014	1.72312	4	110.912	1.92505	4	111.894	0.956564	4
56	-2.03308		101.782	108.819	109.491	104.197	108.474	110.162	111.738	113.477	115.266	108.233	108.263	113.724			-2.03308	106.487	2.19863	4	109.758	1.245	4	112.161	1.39061	4
57	-1.96457		101.314	109.817	108.014	104.141	108.532	109.14	111.779	116.513	115.084	107.457	109.412	112.031			-1.96457	106.173	2.25118	4	111.068	1.83467	4	111.067	1.58381	4
58	-1.89605		101.46	109.237	108.548	105.596	107.545	110.283	110.008	114.305	115.629	108.233	111.489	112.443			-1.89605	106.324	1.85747	4	110.644	1.46353	4	111.726	1.52567	4
59	-1.82755		101.373	108.304	104.274	105.652	108.822	111.064	110.914	115.041	114.721	109.526	110.208	111.436			-1.82755	106.866	2.14309	4	110.594	1.53607	4	110.374	2.19295	4
60	-1.75903		102.015	108.336	106.882	104.085	109.054	109.02	109.72	115.961	112.631	107.155	110.384	111.391			-1.75903	105.744	1.69448	4	110.934	1.7287	4	109.981	1.27581	4
61	-1.69052		101.11	107.113	105.154	104.309	105.63	109.14	109.185	112.374	114.857	108.319	109.103	111.894			-1.69052	105.731	1.87088	4	108.555	1.45825	4	110.261	2.06411	4
62	-1.62202		100.876	104.892	107.385	104.645	107.023	107.577	110.379	115.639	112.267	108.664	111.047	110.933			-1.62202	106.141	2.12684	4	109.65	2.36934	4	109.541	1.22052	4
63	-1.55323		102.366	105.632	106.977	104.365	108.474	107.156	108.196	112.603	115.039	109.31	109.81	111.116			-1.55323	106.059	1.62399	4	109.13	1.4489	4	110.072	1.91144	4
64	-1.48497		100.905	104.12	106.191	104.868	105.107	108.719	107.949	114.075	110.859	107.931	109.103	110.613			-1.48497	105.413	1.66798	4	108.101	2.26403	4	109.096	1.07969	4
65	-1.41645		100.234	103.927	107.165	107.555	106.21	103.788	110.502	112.603	110.359	108.75	109.854	111.802			-1.41645	106.76	2.25816	4	108.149	1.9222	4	108.279	1.78295	4
66	-1.34792		100.701	106.501	105.971	104.924	107.429	106.735	107.166	113.017	111.404	108.793	108.749	112.077			-1.34792	105.396	1.75454	4	108.924	1.44024	4	109.047	1.56904	4
67	-1.2794		102.395	103.991	106.568	104.029	105.456	106.735	108.32	114.903	110.722	108.966	107.733	109.698			-1.2794	105.927	1.60818	4	108.021	2.41993	4	108.431	1.04893	4
68	-1.21087		101.168	109.366	106.348	104.253	102.67	106.494	108.196	113.063	111.131	107.112	109.236	108.783			-1.21087	105.182	1.57542	4	108.584	2.16178	4	108.189	1.12808	4
69	-1.14235		100.029	101.706	104.808	103.693	105.398	105.652	106.837	114.075	111.495	108.534	106.982	111.253			-1.14235	104.773	1.87256	4	107.04	2.59248	4	108.302	1.78258	4
70	0		100	100	100	100	100	100	100	100	100	100	100	100			0	100	0	4	100	0	4	100	0	4
71	0.06835		99.0654	100.225	99.3715	97.8735	98.0847	99.6392	98.1466	101.886	99.8637	99.9138	97.8347	100.274			0.06835	98.7498	0.464234	4	99.5077	0.957185	4	99.7872	0.191062	4
72	0.136617		98.6857	98.0689	98.9315	100.056	96.8659	102.105	100.453	100.184	99.9091	99.6983	98.1441	99.6798			0.136617	99.7233	0.378626	4	98.3157	0.688159	4	100.156	0.682165	4
73	0.205283		100.35	97.5861	98.9943	97.4818	97.2722	100.361	98.6409	98.942	98.8187	100.043	97.7464	98.1244			0.205283	99.1291	0.663272	4	97.8867	0.365309	4	99.0746	0.468068	4
74	0.2735		99.6203	98.6482	97.9887	96.8103	96.5757	99.0379	98.0231	97.5621	98.0009	100.259	96.8626	98.9478			0.2735	98.6781	0.780146	4	97.4122	0.461153	4	98.4938	0.288713	4
75	0.342033		99.9416	96.2343	97.8001	99.2166	97.6204	96.1515	96.0873	98.6201	97.3194	99.6983	97.437	96.7063			0.342033	98.7359	0.895634	4	97.478	0.489305	4	96.9943	0.359195	4
76	0.41055		99.3283	97.5539	97.863	96.9782	96.924	97.1137	98.9292	99.494	97.1831	101.034	98.6301	99.1308			0.41055	99.0675	0.832741	4	98.1505	0.569751	4	97.8226	0.467677	4
77	0.479233		98.8026	97.3608	97.8944	95.7471	97.9106	99.6392	98.4761	100.782	96.6833	100.216	96.9068	98.4904			0.479233	98.3103	0.934069	4	98.24	0.871817	4	98.1768	0.615574	4
78	0.547683		102.599	98.8413	98.083	96.1947	97.0981	98.1359	97.1993	99.448	96.5925	100.517	96.73	97.4382			0.547683	99.1276	1.48053	4	98.0294	0.66002	4	97.5624	0.360104	4
79	0.616217		99.7664	96.9102	97.1087	97.7616	97.6204	93.5658	96.0461	98.758	97.1831	100.129	97.7022	97.301			0.616217	98.4258	0.948815	4	97.7477	0.380842	4	96.2897	0.908807	4
80	0.684733		99.4451	95.8159	97.2344	96.5305	95.415	93.3253	97.0758	101.242	95.6383	98.4483	96.3323	97.5297			0.684733	97.8749	0.660824	4	97.2013	1.35992	4	95.932	0.963072	4
81	0.75325		99.9416	96.6849	94.8146	97.0901	95.9954	93.4456	97.3229	100.92	96.3199	100.776	96.4207	96.1116			0.75325	98.7826	0.926993	4	97.5052	1.14708	4	95.1729	0.665126	4
82	0.821483		99.8248	97.8436	95.7574	97.258	96.1695	92.6639	96.3756	102.07	93.9573	99.6552	96.4649	94.8765			0.821483	98.2784	0.863549	4	98.137	1.36079	4	94.3138	0.661436	4
83	0.89		100.496	95.5262	93.5889	99.3285	95.0087	94.528	97.7759	97.4701	95.6383	99.7845	96.0672	96.5691			0.89	99.3464	0.575998	4	96.0181	0.530056	4	95.0811	0.649174	4
84	0.958517		99.5619	95.7515	94.1232	95.859	94.2542	92.4233	96.0873	97.3781	95.5929	99.8276	96.9951	94.968			0.958517	97.834	1.07671	4	96.0947	0.704928	4	94.2769	0.687315	4
85	1.02705		97.4007	95.1722	95.3174	96.3067	92.3389	92.3632	97.1993	95.6302	95.7746	101.509	95.4485	95.0595			1.02705	98.1038	1.15955	4	94.6475	0.775243	4	94.6287	0.769501	4
86	1.09555		98.861	94.6572	95.5374	94.7957	95.6471	92.4233	96.0461	96.7341	95.8655	102.198	97.3045	95.6542			1.09555	97.9753	1.64442	4	96.0857	0.587275	4	94.8701	0.818412	4
87	1.16407		97.6928	93.402	94.2489	97.258	93.4417	94.107	96.6227	95.0322	93.4575	98.7069	95.1392	94.3275			1.16407	97.5701	0.438016	4	94.2538	0.480881	4	94.0353	0.197907	4
88	1.23258		99.7371	95.655	94.0289	99.2166	92.5131	88.9958	96.3344	95.1702	91.8219	99.569	95.6695	95.4712			1.23258	98.7143	0.800663	4	94.7519	0.755251	4	92.5794	1.41066	4
89	1.3011		99.0654	94.4641	92.0805	98.4331	95.0087	93.3854	95.7578	95.0782	94.866	98.4914	95.802	94.0988			1.3011	97.9369	0.740247	4	95.0883	0.274691	4	93.6077	0.592053	4
90	1.36962		98.1016	95.6872	91.7976	98.2093	91.8746	91.1606	94.9341	94.7102	91.9582	99.7414	93.1065	94.3733			1.36962	97.7466	1.00951	4	93.8446	0.845076	4	92.3224	0.704985	4
91	1.43815		98.0724	93.5629	93.4318	99.0487	93.7319	90.018	95.14	94.8022	92.8214	98.7931	95.6253	93.3669			1.43815	97.7636	0.898601	4	94.4306	0.483603	4	92.4095	0.808829	4
92	1.50667		97.021	91.9858	92.5519	95.6911	93.8479	92.0625	96.7463	94.7102	92.5943	99.9138	93.2391	92.7722			1.50667	97.3431	0.903579	4	93.4458	0.572616	4	92.4952	0.151917	4
93	1.57547		100.263	93.2733	93.6204	96.6424	92.6291	91.5815	95.0165	96.3661	93.5938	99.181	93.2391	94.7392			1.57547	97.7757	1.19229	4	93.8769	0.842838	4	93.3837	0.657373	4
94	1.64372		98.1016	94.271	92.709	94.0683	90.4237	90.0782	95.8814	94.6642	92.0036	98.319	94.9183	92.9094			1.64372	96.5926	1.00564	4	93.5693	1.05695	4	91.9251	0.645542	4
95	1.71223		97.5759	93.2411	92.8975	97.9855	90.7719	89.6572	97.4053	94.5722	90.9587	99.8276	93.7251	92.8179			1.71223	98.1986	0.556487	4	93.0776	0.816299	4	91.5828	0.782699	4
96	1.78077		97.0502	91.6962	90.2577	97.4818	91.8746	91.1004	94.8105	93.1923	90.8224	98.9224	93.0623	93.7786			1.78077	97.0662	0.851788	4	92.4563	0.389981	4	91.4898	0.782823	4
97	1.84928		96.9334	90.8915	91.2319	93.4527	92.6291	91.2207	94.7282	93.1003	91.9582	98.8362	92.753	94.0073			1.84928	95.9876	1.19097	4	92.3435	0.494146	4	92.1045	0.657307	4
98	1.9178		96.6414	92.5974	91.2005	95.1875	89.8433	90.2586	94.7282	93.7902	90.1863	98.2759	94.8299	93.9158			1.9178	96.2082	0.800793	4	92.7652	1.07546	4	91.3903	0.872964	4
99	1.98632		96.9042	91.5674	90.8548	95.2434	92.1068	88.9357	95.6755	93.7902	91.095	98.5345	93.8577	90.9881			1.98632	96.5894	0.737643	4	92.8305	0.584193	4	90.4684	0.513264	4
100	2.05485		97.8096	91.2778	89.2206	96.6984	91.0621	89.0559	95.1812	92.3643	89.5956	99.5259	93.681	92.0403			2.05485	97.3038	0.915844	4	92.0963	0.600175	4	89.9781	0.696597	4
101	2.1233		96.9042	91.3099	89.3463	92.7252	92.9193	90.6795	96.0049	92.9163	91.0041	97.6293	92.9297	91.4456			2.1233	95.8159	1.08247	4	92.5188	0.402969	4	90.6189	0.452297	4
102	2.19182		98.715	91.4387	88.6235	93.6766	91.5264	88.5147	93.9868	91.5823	91.1858	99.1379	94.2996	92.4062			2.19182	96.3791	1.47462	4	92.2118	0.696574	4	90.1826	0.964516	4
103	2.2605		97.5175	90.8915	90.0063	93.3968	90.0754	87.3121	94.8517	94.0662	88.4144	97.5431	91.6041	92.1317			2.2605	95.8273	1.02714	4	91.6593	0.860932	4	89.4661	1.04656	4
104	2.32898		96.5245	91.1168	86.8008	95.1315	90.5978	87.7931	94.0692	92.6403	89.6865	98.1466	91.9576	92.0403			2.32898	95.9679	0.883223	4	91.5781	0.451482	4	89.0802	1.15405	4
105	2.39748		95.6192	91.3743	87.6179	95.2994	89.7272	88.3343	95.0988	92.7783	90.3226	99.0086	91.4715	92.8179			2.39748	96.2565	0.923607	4	91.3378	0.625046	4	89.7732	1.16505	4
106	2.46598		98.6565	89.6041	88.3721	93.9004	92.0488	85.3277	93.3278	92.9623	88.9141	97.6293	93.1507	91.3083			2.46598	95.8785	1.32921	4	91.9415	0.815422	4	88.4806	1.22938	4
107	2.5345		96.5829	89.7329	87.3664	94.5159	89.437	86.1094	93.6161	90.5704	88.7778	97.8879	93.4158	92.8179			2.5345	95.6507	0.970454	4	90.789	0.907893	4	88.7679	1.45586	4
108	2.6028		95.7652	89.765	88.4349	93.7885	90.0754	87.9735	94.1516	93.3303	87.4602	98.4483	93.681	91.8573			2.6028	95.5384	1.06083	4	91.7129	1.03941	4	88.9315	0.995362	4
109	2.67132		95.8236	89.3466	85.2608	92.7252	90.5978	88.3343	92.9572	91.3983	88.2326	97.1552	92.8414	90.5764			2.67132	94.6653	1.08868	4	91.046	0.732358	4	88.1011	1.09033	4
110	2.73983		95.0643	88.4454	86.0465	93.3408	90.0754	89.2363	94.3987	90.9844	88.9596	97.9741	92.2227	91.9488			2.73983	95.1945	0.992175	4	90.432	0.79505	4	89.0478	1.20646	4
111	2.80835		94.6262	90.5375	85.9837	93.7325	93.1515	85.9892	93.6985	92.4103	88.5052	98.1466	91.7808	92.5435			2.80835	95.0509	1.05398	4	91.97	0.553595	4	88.2554	1.54775	4
112	2.87688		95.5315	89.4754	85.9208	93.005	90.2496	83.644	93.2455	91.8583	88.3235	99.3534	91.8692	90.8966			2.87688	95.2839	1.47114	4	90.8631	0.598952	4	87.1962	1.56014	4
113	2.94567		96.4661	89.3788	85.418	93.6766	89.7853	87.9134	94.9753	92.4563	87.96	98.1034	93.681	92.7722			2.94567	95.8054	0.954754	4	91.3253	1.04038	4	88.5159	1.53799	4
114	3.01392		95.6484	88.7029	85.858	93.9004	87.6378	84.6663	91.3509	93.2383	90.3226	97.6293	92.3111	91.3083			3.01392	94.6322	1.33284	4	90.4725	1.36004	4	88.0388	1.6339	4
115	3.08245		96.3493	89.3788	84.9151	93.3408	90.7719	83.7643	94.3575	90.3864	88.9141	98.75	92.046	92.086			3.08245	95.6994	1.19346	4	90.6458	0.551429	4	87.4199	1.90706	4
116	3.15097		96.0572	88.0592	85.858	93.2289	88.0441	84.3055	93.5338	92.5023	90.1863	97.8879	91.8692	89.7987			3.15097	95.177	1.10376	4	90.1187	1.20039	4	87.5371	1.45476	4
117	3.2195		95.736	89.2823	84.758	92.0537	90.0754	84.1852	93.0807	91.3983	86.2335	96.9397	92.4437	90.6221			3.2195	94.4525	1.13539	4	90.7999	0.700482	4	86.4497	1.45619	4
118	3.28802		96.5245	88.6707	83.2181	92.6693	91.0621	83.9447	92.7924	91.4903	87.2785	99.0086	91.118	89.753			3.28802	95.2487	1.53979	4	90.5853	0.645221	4	86.0486	1.51859	4
119	3.35653		96.2909	88.5098	84.1923	93.2289	88.3343	82.3812	91.0626	92.5943	87.3694	98.2328	93.5484	90.0274			3.35653	94.7038	1.59181	4	90.7467	1.35666	4	85.9926	1.69456	4
120	3.42528		96.4661	88.4776	84.7266	92.6693	88.5665	84.3055	93.0395	91.0764	87.9146	98.4914	90.0133	90.3477			3.42528	95.1666	1.39952	4	89.5334	0.623206	4	86.8236	1.42442	4
121	3.49355		97.1963	88.7995	84.1295	91.8858	88.0441	86.1094	93.9044	90.0644	86.8696	97.931	91.118	92.086			3.49355	95.2294	1.41722	4	89.5065	0.679863	4	87.2986	1.69707	4
122	3.56238		96.0572	89.7007	84.5695	92.2776	86.5351	84.0048	91.0214	90.7544	86.6879	98.4914	91.118	90.1647			3.56238	94.4619	1.71732	4	89.527	1.0416	4	86.3567	1.39451	4
123	3.63082		95.6484	87.9627	83.3752	90.5428	87.5218	82.0806	94.3575	90.9844	86.5061	96.4224	91.6041	91.1253			3.63082	94.2428	1.30478	4	89.5182	1.03706	4	85.7718	2.0118	4
124	3.69905		97.1379	87.3511	84.6952	93.2289	88.4504	81.5995	92.916	90.4784	88.1418	97.2414	90.6319	88.7923			3.69905	95.131	1.19043	4	89.228	0.799045	4	85.8072	1.66589	4
125	3.7677		96.2909	88.2845	81.8039	90.5988	87.4057	85.6885	92.257	91.0304	86.0064	96.4655	93.6368	90.2104			3.7677	93.903	1.46901	4	90.0893	1.41212	4	85.9273	1.71782	4
126	3.83615		96.1741	87.6086	84.6323	92.7812	87.4637	85.6284	93.5338	90.8004	86.6424	97.6293	89.7039	89.8902			3.83615	95.0296	1.13141	4	88.8942	0.815888	4	86.6983	1.14034	4
127	3.9047		96.2325	86.9649	86.3608	91.8858	88.7406	83.5839	92.6277	91.3983	85.9609	96.25	90.6761	89.6157			3.9047	94.249	1.16015	4	89.445	0.999089	4	86.3803	1.24044	4
128	3.97322		95.2395	88.1558	83.1552	91.718	86.9994	80.8178	92.257	90.1564	85.5066	96.5948	91.3389	89.204			3.97322	93.9523	1.17282	4	89.1626	0.975409	4	84.6709	1.78865	4
129	4.042		95.0643	87.5764	82.9038	92.5574	88.7406	83.5839	92.9572	92.1803	86.0972	96.7241	90.3668	89.2498			4.042	94.3257	0.970304	4	89.716	1.00106	4	85.4587	1.43824	4
130	4.11025		95.1811	87.1902	85.2608	92.5014	87.4057	83.7041	93.2043	91.2603	85.9155	96.5086	91.2947	89.753			4.11025	94.3488	0.916529	4	89.2878	1.14967	4	86.1584	1.28481	4
131	4.17877		95.4731	86.7396	82.7467	92.5574	86.419	82.6819	91.9687	90.7084	86.279	96.6379	89.8365	89.3413			4.17877	94.1593	1.12675	4	88.4259	1.08284	4	85.2622	1.59839	4
132	4.2473		95.3855	88.3811	80.2011	91.3262	87.5798	82.8022	92.8336	89.6964	87.3239	95.819	88.8643	90.1647			4.2473	93.8411	1.06602	4	88.6304	0.443192	4	85.123	2.23371	4
133	4.31582		96.875	87.7052	82.4639	90.5988	88.6825	83.163	94.9341	91.6743	87.4148	96.3362	88.9085	89.7072			4.31582	94.686	1.4225	4	89.2426	0.85158	4	85.6872	1.72981	4
134	4.38435		95.8528	87.0293	80.5783	91.9978	86.7673	83.644	92.0923	91.2603	86.5516	96.9828	88.9527	89.0668			4.38435	94.2314	1.28335	4	88.5024	1.04042	4	84.9602	1.83327	4
135	4.45287		96.4661	88.2201	81.1439	90.7666	86.9414	81.5394	92.2982	89.5124	86.2335	98.319	89.0853	88.5178			4.45287	94.4625	1.7614	4	88.4398	0.567207	4	84.3587	1.80501	4
136	4.5214		95.2979	87.4155	82.0239	90.263	87.928	81.1786	94.1928	89.2824	84.3707	98.5345	89.3062	88.5178			4.5214	94.572	1.70635	4	88.4831	0.479959	4	84.0228	1.64346	4
137	4.58992		96.6706	86.6431	82.0239	92.3895	86.1869	81.6597	93.7397	91.6743	85.0522	96.5948	89.9249	89.8445			4.58992	94.8486	1.06637	4	88.6073	1.31844	4	84.6451	1.89259	4
138	4.65845		97.4007	87.7052	81.6153	93.2848	88.2182	80.6975	92.4629	90.7084	86.279	97.8448	89.4388	89.7072			4.65845	95.2483	1.38408	4	89.0176	0.670669	4	84.5748	2.10233	4
139	4.72697		96.4369	86.9649	81.2382	89.7034	87.5798	79.9158	92.0511	89.0984	85.8246	96.2931	90.411	88.4721			4.72697	93.6211	1.65534	4	88.5135	0.775264	4	83.8627	1.99085	4
140	4.79547		95.9112	87.4155	80.7668	92.2216	87.928	81.7799	90.8567	90.3864	87.7328	96.0776	89.3504	87.4199			4.79547	93.7668	1.31639	4	88.7701	0.67658	4	84.4249	1.83236	4
141	4.864		95.7652	87.1258	80.2954	89.9832	88.3923	83.0427	91.2685	90.1564	85.1431	97.2845	90.8529	88.4263			4.864	93.5754	1.75066	4	89.1319	0.845699	4	84.2269	1.71595	4
142	4.93253		94.6554	88.1558	81.8353	90.1511	87.1155	81.9002	93.2867	89.6504	86.0064	96.9397	89.8807	87.8317			4.93253	93.7582	1.41893	4	88.7006	0.652184	4	84.3934	1.50508	4
143	5.00103		94.6554	87.4799	80.484	89.1438	85.2002	80.0962	92.257	89.8804	86.0972	96.3793	88.0247	88.7923			5.00103	93.1089	1.56883	4	87.6463	0.963733	4	83.8674	2.13885	4
144	5.06957		95.6776	88.5742	80.0126	90.8226	86.8253	81.6597	92.2158	90.4324	85.552	97.1552	88.555	89.4328			5.06957	93.9678	1.47321	4	88.5967	0.736536	4	84.1642	2.1054	4
145	5.13808		95.4731	86.7074	79.8869	92.1656	85.4904	83.4636	92.6277	89.8804	83.0986	95.9483	90.2342	87.0997			5.13808	94.0537	0.9662	4	88.0781	1.1716	4	83.3872	1.47548	4
146	5.2066		95.3563	85.9028	77.4356	91.662	85.4324	83.7643	93.6573	90.0184	83.5075	96.2931	90.0133	86.688			5.2066	94.2422	1.01845	4	87.8417	1.2589	4	82.8488	1.94325	4
147	5.27512		93.9544	87.158	81.3011	91.2143	85.7806	79.0138	91.8451	90.8924	85.3249	96.8103	89.262	87.8774			5.27512	93.4561	1.26227	4	88.2733	1.12895	4	83.3793	1.98734	4
148	5.34363		94.5678	86.0315	79.6983	89.9832	85.5485	80.3969	93.7397	90.5704	85.7792	97.5431	87.9806	87.9231			5.34363	93.9584	1.55647	4	87.5327	1.14086	4	83.4494	2.01724	4
149	5.41217		94.5093	87.5443	77.5613	92.2776	85.8967	81.9002	92.1746	90.8924	84.3707	98.3621	89.9691	87.5572			5.41217	94.3309	1.44764	4	88.5756	1.13832	4	82.8473	2.10837	4
150	6.63178		81.9217	6.72675	7.44815	65.0811	15.7284	12.1467	69.8929	19.3192	14.4934	76.8534	18.2943	11.9396			6.63178	73.4373	3.71981	4	15.0172	2.86479	4	11.507	1.47166	4
151	6.70005		84.1414	6.40489	6.5682	66.2563	15.9025	11.4251	66.7628	21.0672	16.3562	76.8966	19.2223	12.3056			6.70005	73.5142	4.30732	4	15.6492	3.26142	4	11.6638	2.00941	4
152	6.76857		82.2722	6.37271	6.15965	65.4169	15.7864	11.2447	66.6392	22.9531	16.7651	75.1724	18.5594	11.7566			6.76857	72.3752	3.94857	4	15.9179	3.50713	4	11.4815	2.16738	4
153	6.8371		82.5935	6.05085	5.53111	67.4314	16.3088	10.7035	67.9572	24.425	17.1286	74.9138	18.2059	11.2077			6.8371	73.224	3.55827	4	16.2476	3.81535	4	11.1427	2.37202	4
154	6.90562		82.4182	5.98648	5.15399	65.1931	15.8445	10.6434	68.8633	23.2291	15.9473	74.7845	17.8082	11.1162			6.90562	72.8148	3.76177	4	15.7171	3.59981	4	10.7152	2.20733	4
155	6.97413		83.4696	5.85774	4.90258	66.4801	16.599	9.98196	67.7512	24.195	15.4021	75.5172	17.8966	10.3843			6.97413	73.3046	3.93316	4	16.1371	3.80684	4	10.1677	2.1448	4
156	7.04265		84.4334	5.92211	4.77687	65.5848	15.9605	10.0421	68.0807	23.0451	14.4934	76.4224	19.0455	9.5151			7.04265	73.6303	4.28205	4	15.9933	3.65688	4	9.70687	1.98673	4
157	7.11117		83.5572	6.05085	4.58831	65.7527	15.6703	9.92183	67.5041	22.6771	13.1758	72.9741	19.0897	9.97255			7.11117	72.447	4.01	4	15.872	3.57256	4	9.41463	1.77971	4
158	7.17968		82.8855	6.01867	4.43118	66.7599	16.3088	9.92183	66.2273	22.6311	13.3121	76.1207	19.3548	9.5151			7.17968	72.9984	4.0028	4	16.0783	3.5931	4	9.29506	1.83111	4
159	7.2482		83.1192	5.9543	4.39975	66.5361	16.0186	9.92183	67.9984	22.7231	12.358	74.9569	18.9129	9.33211			7.2482	73.1526	3.79619	4	15.9022	3.58891	4	9.00293	1.6683	4
160	7.31673		82.3598	6.05085	4.21119	66.9838	16.2507	9.6813	66.9275	21.9411	12.4035	72.7155	19.0897	9.69808			7.31673	72.2467	3.63418	4	15.8331	3.46146	4	8.9985	1.7192	4
			Mn Concentrations
			0	50	400	0	50	400	0	50	400	0	50	400
			4412	4222	4368	2111	2127	2105	3366	3309	3192	2550	2784	2803
			4373	4246	4359	2135	2082	2096	3297	3316	3209	2538	2755	2751
			4340	4190	4398	2097	2111	2040	3420	3314	3183	2550	2749	2833
			4312	4166	4389	2185	2070	2099	3362	3328	3189	2594	2820	2729
			4301	4196	4306	2136	2092	2103	3343	3272	3185	2561	2749	2793
			4386	4139	4391	2062	2074	2100	3324	3255	3163	2562	2733	2759
			4420	4190	4142	2098	2046	2079	3288	3199	3198	2530	2772	2729
			4377	4141	4233	2101	2157	2054	3278	3229	3139	2535	2726	2741
			4302	4147	4278	2097	2028	2044	3236	3174	3158	2535	2670	2744
			4333	4143	4260	2098	2041	2035	3283	3182	3137	2493	2694	2670
			4256	4136	4214	2110	2083	2052	3209	3181	3084	2453	2668	2656
			4331	4059	4180	2104	2033	2032	3196	3162	3124	2519	2635	2633
			4301	4070	4209	2107	2016	2072	3203	3163	3104	2462	2644	2651
			4239	4090	4048	2047	2022	2067	3197	3168	3099	2449	2643	2640
			4291	4030	4180	2098	2018	2034	3190	3139	3087	2455	2625	2587
			4305	4100	4078	2048	1986	2025	3204	3147	3098	2446	2638	2612
			4355	3944	4043	2056	2015	2040	3122	3103	3138	2449	2617	2650
			4245	3993	4155	2063	2003	1996	3108	3074	3020	2462	2591	2617
			4228	4004	4101	2062	2038	2023	3107	3112	3027	2449	2616	2617
			4275	3941	4152	2068	1990	2024	3117	3046	3000	2412	2636	2614
			4290	3895	4016	2069	1974	2051	3112	3037	3002	2449	2611	2591
			4237	3883	4073	2078	1983	2013	3115	3061	2982	2444	2637	2559
			4286	3927	4081	2062	1987	2008	3127	3008	3008	2417	2616	2601
			4237	3853	3939	2076	1945	1976	3084	3024	2992	2437	2606	2594
			4250	3873	4036	2018	1932	1920	3128	2989	2965	2448	2608	2625
			4153	3894	4064	2052	1942	2003	3051	2960	2939	2404	2599	2568
			4254	3875	4058	2066	1956	1965	3060	2955	2935	2434	2570	2587
			4194	3832	3967	2019	1944	1989	2985	2932	2934	2470	2635	2537
			4151	3799	3981	2015	2008	1987	3028	2954	2950	2440	2593	2573
			4107	3809	3958	2021	1936	1923	2963	2936	2958	2441	2572	2554
			4090	3809	3944	1991	1974	1947	3064	2942	2870	2412	2589	2531
			4169	3769	3914	1997	1927	1932	2932	2920	2843	2430	2596	2538
			4179	3741	3878	1999	1942	1964	3016	2914	2874	2453	2588	2509
			4125	3790	3884	1955	1923	1917	2933	2902	2877	2414	2578	2509
			4165	3731	3788	2005	1912	1931	2950	2900	2796	2448	2538	2499
			4215	3660	3859	2008	1912	1910	3073	2928	2871	2462	2580	2519
			4080	3661	3897	1985	1927	1899	2912	2866	2767	2393	2558	2525
			4118	3636	3874	1995	1905	1875	2958	2872	2786	2420	2518	2550
			4075	3632	3753	1985	1886	1855	2907	2872	2806	2407	2556	2549
			4153	3687	3871	1992	1925	1896	2899	2852	2767	2426	2544	2522
			4119	3649	3825	2015	1875	1866	2978	2809	2800	2455	2545	2513
			4067	3671	3748	1941	1889	1869	2883	2821	2752	2445	2537	2505
			4019	3659	3746	1964	1871	1848	2905	2820	2770	2413	2541	2489
			4097	3590	3783	1961	1877	1854	2905	2832	2785	2434	2497	2492
			4117	3604	3735	2064	1900	1871	2871	2784	2705	2408	2524	2482
			4087	3571	3798	1958	1887	1809	2825	2721	2743	2401	2536	2439
			4092	3585	3745	1917	1841	1885	2876	2746	2727	2417	2578	2490
			4068	3621	3723	1963	1866	1900	2823	2785	2777	2438	2529	2508
			4031	3579	3704	1955	1882	1829	2870	2800	2704	2426	2539	2483
			3504	3449	3554	1904	1915	1888	2750	2589	2606	2529	2572	2514
			3494	3468	3489	1862	1925	1933	2719	2520	2605	2565	2530	2488
			3482	3470	3442	1927	1904	1901	2663	2525	2547	2557	2494	2498
			3522	3429	3450	1887	1975	1895	2687	2543	2563	2551	2514	2455
			3488	3404	3420	1870	1859	1856	2705	2536	2539	2534	2504	2474
			3517	3381	3493	1896	1850	1865	2690	2525	2517	2516	2519	2433
			3485	3381	3484	1862	1869	1832	2713	2467	2537	2511	2450	2486
			3469	3412	3437	1861	1870	1815	2714	2533	2533	2493	2476	2449
			3474	3394	3454	1887	1853	1834	2671	2485	2545	2511	2523	2458
			3471	3365	3318	1888	1875	1847	2693	2501	2525	2541	2494	2436
			3493	3366	3401	1860	1879	1813	2664	2521	2479	2486	2498	2435
			3462	3328	3346	1864	1820	1815	2651	2443	2528	2513	2469	2446
			3454	3259	3417	1870	1844	1789	2680	2514	2471	2521	2513	2425
			3505	3282	3404	1865	1869	1782	2627	2448	2532	2536	2485	2429
			3455	3235	3379	1874	1811	1808	2621	2480	2440	2504	2469	2418
			3432	3229	3410	1922	1830	1726	2683	2448	2429	2523	2486	2444
			3448	3309	3372	1875	1851	1775	2602	2457	2452	2524	2461	2450
			3506	3231	3391	1859	1817	1775	2630	2498	2437	2528	2438	2398
			3464	3398	3384	1863	1769	1771	2627	2458	2446	2485	2472	2378
			3425	3160	3335	1853	1816	1757	2594	2480	2454	2518	2421	2432
			3424	3107	3182	1787	1723	1663	2428	2174	2201	2320	2263	2186
			3392	3114	3162	1749	1690	1657	2383	2215	2198	2318	2214	2192
			3379	3047	3148	1788	1669	1698	2439	2178	2199	2313	2221	2179
			3436	3032	3150	1742	1676	1669	2395	2151	2175	2321	2212	2145
			3411	3065	3118	1730	1664	1647	2380	2121	2157	2326	2192	2163
			3422	2990	3112	1773	1682	1599	2333	2144	2142	2313	2205	2114
			3401	3031	3114	1733	1670	1615	2402	2163	2139	2344	2232	2167
			3383	3025	3115	1711	1687	1657	2391	2191	2128	2325	2193	2153
			3513	3071	3121	1719	1673	1632	2360	2162	2126	2332	2189	2130
			3416	3011	3090	1747	1682	1556	2332	2147	2139	2323	2211	2127
			3405	2977	3094	1725	1644	1552	2357	2201	2105	2284	2180	2132
			3422	3004	3017	1735	1654	1554	2363	2194	2120	2338	2182	2101
			3418	3040	3047	1738	1657	1541	2340	2219	2068	2312	2183	2074
			3441	2968	2978	1775	1637	1572	2374	2119	2105	2315	2174	2111
			3409	2975	2995	1713	1624	1537	2333	2117	2104	2316	2195	2076
			3335	2957	3033	1721	1591	1536	2360	2079	2108	2355	2160	2078
			3385	2941	3040	1694	1648	1537	2332	2103	2110	2371	2202	2091
			3345	2902	2999	1738	1610	1565	2346	2066	2057	2290	2153	2062
			3415	2972	2992	1773	1594	1480	2339	2069	2021	2310	2165	2087
			3392	2935	2930	1759	1637	1553	2325	2067	2088	2285	2168	2057
			3359	2973	2921	1755	1583	1516	2305	2059	2024	2314	2107	2063
			3358	2907	2973	1770	1615	1497	2310	2061	2043	2292	2164	2041
			3322	2858	2945	1710	1617	1531	2349	2059	2038	2318	2110	2028
			3433	2898	2979	1727	1596	1523	2307	2095	2060	2301	2110	2071
			3359	2929	2950	1681	1558	1498	2328	2058	2025	2281	2148	2031
			3341	2897	2956	1751	1564	1491	2365	2056	2002	2316	2121	2029
			3323	2849	2872	1742	1583	1515	2302	2026	1999	2295	2106	2050
			3319	2824	2903	1670	1596	1517	2300	2024	2024	2293	2099	2055
			3309	2877	2902	1701	1548	1501	2300	2039	1985	2280	2146	2053
			3318	2845	2891	1702	1587	1479	2323	2039	2005	2286	2124	1989
			3349	2836	2839	1728	1569	1481	2311	2008	1972	2309	2120	2012
			3318	2837	2843	1657	1601	1508	2331	2020	2003	2265	2103	1999
			3380	2841	2820	1674	1577	1472	2282	1991	2007	2300	2134	2020
			3339	2824	2864	1669	1552	1452	2303	2045	1946	2263	2073	2014
			3305	2831	2762	1700	1561	1460	2284	2014	1974	2277	2081	2012
			3274	2839	2788	1703	1546	1469	2309	2017	1988	2297	2070	2029
			3378	2784	2812	1678	1586	1419	2266	2021	1957	2265	2108	1996
			3307	2788	2780	1689	1541	1432	2273	1969	1954	2271	2114	2029
			3279	2789	2814	1676	1552	1463	2286	2029	1925	2284	2120	2008
			3281	2776	2713	1657	1561	1469	2257	1987	1942	2254	2101	1980
			3255	2748	2738	1668	1552	1484	2292	1978	1958	2273	2087	2010
			3240	2813	2736	1675	1605	1430	2275	2009	1948	2277	2077	2023
			3271	2780	2734	1662	1555	1391	2264	1997	1944	2305	2079	1987
			3303	2777	2718	1674	1547	1462	2306	2010	1936	2276	2120	2028
			3275	2756	2732	1678	1510	1408	2218	2027	1988	2265	2089	1996
			3299	2777	2702	1668	1564	1393	2291	1965	1957	2291	2083	2013
			3289	2736	2732	1666	1517	1402	2271	2011	1985	2271	2079	1963
			3278	2774	2697	1645	1552	1400	2260	1987	1898	2249	2092	1981
			3305	2755	2648	1656	1569	1396	2253	1989	1921	2297	2062	1962
			3297	2750	2679	1666	1522	1370	2211	2013	1923	2279	2117	1968
			3303	2749	2696	1656	1526	1402	2259	1980	1935	2285	2037	1975
			3328	2759	2677	1642	1517	1432	2280	1958	1912	2272	2062	2013
			3289	2787	2691	1649	1491	1397	2210	1973	1908	2285	2062	1971
			3275	2733	2653	1618	1508	1365	2291	1978	1904	2237	2073	1992
			3326	2714	2695	1666	1524	1357	2256	1967	1940	2256	2051	1941
			3297	2743	2603	1619	1506	1425	2240	1979	1893	2238	2119	1972
			3293	2722	2693	1658	1507	1424	2271	1974	1907	2265	2030	1965
			3295	2702	2748	1642	1529	1390	2249	1987	1892	2233	2052	1959
			3261	2739	2646	1639	1499	1344	2240	1960	1882	2241	2067	1950
			3255	2721	2638	1654	1529	1390	2257	2004	1895	2244	2045	1951
			3259	2709	2713	1653	1506	1392	2263	1984	1891	2239	2066	1962
			3269	2695	2633	1654	1489	1375	2233	1972	1899	2242	2033	1953
			3266	2746	2552	1632	1509	1377	2254	1950	1922	2223	2011	1971
			3317	2725	2624	1619	1528	1383	2305	1993	1924	2235	2012	1961
			3282	2704	2564	1644	1495	1391	2236	1984	1905	2250	2013	1947
			3303	2741	2582	1622	1498	1356	2241	1946	1898	2281	2016	1935
			3263	2716	2610	1613	1515	1350	2287	1941	1857	2286	2021	1935
			3310	2692	2610	1651	1485	1358	2276	1993	1872	2241	2035	1964
			3335	2725	2597	1667	1520	1342	2245	1972	1899	2270	2024	1961
			3302	2702	2585	1603	1509	1329	2235	1937	1889	2234	2046	1934
			3284	2716	2570	1648	1515	1360	2206	1965	1931	2229	2022	1911
			3279	2707	2555	1608	1523	1381	2216	1960	1874	2257	2056	1933
			3241	2739	2604	1611	1501	1362	2265	1949	1893	2249	2034	1920
			3241	2718	2561	1593	1468	1332	2240	1954	1895	2236	1992	1941
			3276	2752	2546	1623	1496	1358	2239	1966	1883	2254	2004	1955
			3269	2694	2542	1647	1473	1388	2249	1954	1829	2226	2042	1904
			3265	2669	2464	1638	1472	1393	2274	1957	1838	2234	2037	1895
			3217	2708	2587	1630	1478	1314	2230	1976	1878	2246	2020	1921
			3238	2673	2536	1608	1474	1337	2276	1969	1888	2263	1991	1922
			3236	2720	2468	1649	1480	1362	2238	1976	1857	2282	2036	1914
			2805	209	237	1163	271	202	1697	420	319	1783	414	261
			2881	199	209	1184	274	190	1621	458	360	1784	435	269
			2817	198	196	1169	272	187	1618	499	369	1744	420	257
			2828	188	176	1205	281	178	1650	531	377	1738	412	245
			2822	186	164	1165	273	177	1672	505	351	1735	403	243
			2858	182	156	1188	286	166	1645	526	339	1752	405	227
			2891	184	152	1172	275	167	1653	501	319	1773	431	208
			2861	188	146	1175	270	165	1639	493	290	1693	432	218
			2838	187	141	1193	281	165	1608	492	293	1766	438	208
			2846	185	140	1189	276	165	1651	494	272	1739	428	204
			2820	188	134	1197	280	161	1625	477	273	1687	432	212

## Sheet: Figure5C
SiNRAT1-N69A
LPR50
Mn
																Condition
			Mn Concentrations													Mean	SEM	N
Cycle Nr.	Time (min)		0	50	400	0	50	400	0	50	400				Time (min)	0 µM Mn2+			50 μM Mn2+			400 μM Mn2+
1	-6.95145		119.746	125.329	131.146	127.175	130.4	129.095	140.356	141.989	145.252				-6.95145	129.092	6.02651	3	132.573	4.93064	3	135.164	5.07846	3
2	-6.8828		118.837	124.095	130.594	123.587	128.188	130.112	141.399	142.077	143.023				-6.8828	127.941	6.86716	3	131.454	5.44171	3	134.576	4.22556	3
3	-6.81432		119.685	123.849	129.282	124.126	130.4	126.857	141.703	141.153	143.513				-6.81432	128.505	6.72255	3	131.801	5.04423	3	133.217	5.19539	3
4	-6.74607		118.655	123.684	129.903	120.224	127.482	129.298	139.14	143.97	143.067				-6.74607	126.007	6.5823	3	131.712	6.22624	3	134.09	4.49227	3
5	-6.67755		116.959	121.382	131.492	119.462	128.941	126.246	138.01	140.229	144.004				-6.67755	124.811	6.63934	3	130.184	5.47611	3	133.914	5.26724	3
6	-6.60903		116.535	119.655	130.387	121.794	126.447	127.67	139.357	140.977	143.112				-6.60903	125.895	6.89989	3	129.026	6.28891	3	133.723	4.75949	3
7	-6.54027		116.475	122.697	130.663	120.224	129.035	126.806	137.576	138.644	142.354				-6.54027	124.758	6.49957	3	130.126	4.63567	3	133.274	4.67445	3
8	-6.47202		116.293	120.806	127.348	118.7	129.365	128.535	139.401	141.505	140.972				-6.47202	124.798	7.33434	3	130.559	6.00515	3	132.285	4.35693	3
9	-6.40323		115.566	121.299	127.762	121.3	127.529	123.856	137.272	138.82	141.329				-6.40323	124.713	6.49402	3	129.216	5.12776	3	130.982	5.29473	3
10	-6.33487		118.837	123.355	127.901	120.583	125.176	126.806	135.187	140.097	140.259				-6.33487	124.869	5.18348	3	129.543	5.30309	3	131.655	4.31341	3
11	-6.26633		115.627	120.806	127.486	118.834	124.847	127.314	135.274	139.701	143.87				-6.26633	123.245	6.08524	3	128.451	5.74444	3	132.89	5.49007	3
12	-6.19777		115.021	120.23	128.108	116.771	124.988	127.263	133.753	141.065	140.972				-6.19777	121.849	5.97375	3	128.761	6.30341	3	132.114	4.43547	3
13	-6.12923		113.628	118.586	128.246	119.552	126.165	123.601	136.056	136.092	141.507				-6.12923	123.078	6.71012	3	126.947	5.06867	3	131.118	5.36471	3
14	-6.06095		113.144	120.312	128.66	117.758	125.976	123.957	132.059	138.468	141.774				-6.06095	120.987	5.69414	3	128.252	5.36324	3	131.464	5.33098	3
15	-5.99238		112.356	120.888	125.967	117.265	127.012	125.229	132.971	136.664	141.641				-5.99238	120.864	6.21727	3	128.188	4.5918	3	130.946	5.35184	3
16	-5.92413		112.72	117.845	126.312	115.516	126.024	126.501	132.407	135.519	141.819				-5.92413	120.214	6.14952	3	126.463	5.10677	3	131.544	5.13784	3
17	-5.85558		111.872	117.681	127.21	116.099	124.941	123.093	133.406	137.588	138.52				-5.85558	120.459	6.58752	3	126.737	5.81639	3	129.607	4.61197	3
18	-5.7872		110.297	117.599	124.793	117.489	124	125.28	130.886	134.067	140.927				-5.7872	119.557	6.03296	3	125.222	4.79305	3	130.333	5.29887	3
19	-5.71838		110.115	116.118	126.105	116.771	124.753	123.805	131.842	132.967	140.972				-5.71838	119.576	6.42686	3	124.613	4.86413	3	130.294	5.38015	3
20	-5.64983		110.297	116.612	128.108	113.139	124.047	124.924	133.406	132.042	139.456				-5.64983	118.947	7.27568	3	124.234	4.45538	3	130.829	4.41031	3
21	-5.58125		110.236	117.105	124.448	115.516	124.8	121.77	129.757	131.382	139.144				-5.58125	118.503	5.82966	3	124.429	4.1255	3	128.454	5.40066	3
22	-5.51273		109.631	116.365	122.583	115.785	124.518	122.533	129.366	130.986	137.851				-5.51273	118.26	5.83	3	123.956	4.22999	3	127.656	5.09772	3
23	-5.44448		107.511	112.664	120.511	114.17	121.929	121.414	129.409	132.394	143.781				-5.44448	117.03	6.48127	3	122.329	5.69904	3	128.569	7.61053	3
24	-5.37595		110.115	113.24	120.166	114.529	125.224	122.584	131.321	131.162	140.08				-5.37595	118.655	6.45975	3	123.209	5.27079	3	127.61	6.27409	3
25	-5.30743		109.388	112.089	121.478	114.574	122.071	119.379	128.714	131.25	138.698				-5.30743	117.559	5.7751	3	121.803	5.53298	3	126.519	6.11989	3
26	-5.23892		107.268	114.145	118.439	116.188	122.824	122.38	129.062	129.445	137.985				-5.23892	117.506	6.32562	3	122.138	4.43022	3	126.268	5.96778	3
27	-5.17002		106.42	109.786	118.923	112.646	121.976	119.837	125.326	128.785	141.195				-5.17002	114.797	5.56254	3	120.183	5.5574	3	126.652	7.27641	3
28	-5.10175		108.843	111.102	122.307	114.305	121.506	120.142	124.414	129.401	139.501				-5.10175	115.854	4.56105	3	120.67	5.2991	3	127.317	6.12402	3
29	-5.03327		107.753	111.842	119.199	114.215	122.635	118.922	125.413	130.458	140.704				-5.03327	115.794	5.15867	3	121.645	5.39662	3	126.275	7.21514	3
30	-4.96475		106.36	109.539	117.887	113.857	122.165	120.905	128.149	126.496	136.558				-4.96475	116.122	6.39129	3	119.4	5.08647	3	125.117	5.78671	3
31	-4.89597		104.724	109.704	115.401	113.274	120.235	119.379	123.241	128.653	139.099				-4.89597	113.746	5.35042	3	119.531	5.48152	3	124.626	7.32704	3
32	-4.82742		107.087	109.293	117.265	113.587	120.282	121.974	122.893	127.641	138.966				-4.82742	114.522	4.58683	3	119.072	5.33107	3	126.068	6.59045	3
33	-4.75873		105.391	110.115	115.401	112.466	122.118	119.583	124.5	125.352	139.055				-4.75873	114.119	5.57805	3	119.195	4.63494	3	124.679	7.28838	3
34	-4.6901		107.087	108.059	115.815	113.139	124.424	118.413	123.241	127.025	138.297				-4.6901	114.489	4.71187	3	119.836	5.93597	3	124.175	7.1007	3
35	-4.62162		100.787	104.441	117.403	112.646	120.941	121.363	124.24	124.208	139.902				-4.62162	112.558	6.77027	3	116.53	6.11766	3	126.223	6.93442	3
36	-4.55308		103.998	105.345	112.983	113.498	120.941	117.904	122.068	123.68	135.711				-4.55308	113.188	5.21872	3	116.655	5.70998	3	122.2	6.90347	3
37	-4.4844		103.089	106.99	115.539	113.991	120.047	117.497	120.07	124.428	135.756				-4.4844	112.383	4.96733	3	117.155	5.23741	3	122.931	6.43742	3
38	-4.41588		102.604	107.73	112.914	111.749	124.941	118.21	120.243	122.623	136.959				-4.41588	111.532	5.09304	3	118.432	5.39231	3	122.694	7.29443	3
39	-4.34737		100.848	106.661	114.779	113.901	121.553	120.193	121.373	121.831	136.87				-4.34737	112.041	5.99756	3	116.682	5.01089	3	123.948	6.64773	3
40	-4.27887		100.848	105.839	113.881	113.543	121.741	118.311	120.2	122.711	134.909				-4.27887	111.53	5.67628	3	116.764	5.46966	3	122.367	6.39986	3
41	-4.21035		104.058	107.319	114.019	113.139	121.129	118.057	120.808	124.648	135.176				-4.21035	112.668	4.841	3	117.699	5.28831	3	122.417	6.48493	3
42	-4.14183		98.8492	107.155	111.533	112.152	120.518	117.396	120.504	123.151	135.042				-4.14183	110.502	6.30543	3	116.941	4.95202	3	121.324	7.06503	3
43	-4.07332		101.575	105.839	111.533	111.121	120.988	118.566	119.114	121.611	134.775				-4.07332	110.603	5.06969	3	116.146	5.15672	3	121.625	6.88145	3
44	-4.0048		100.727	101.645	115.608	111.704	118.353	116.328	120.46	124.516	134.819				-4.0048	110.964	5.70864	3	114.838	6.83225	3	122.252	6.28735	3
45	-3.93628		99.4549	104.194	111.74	111.57	119.247	117.854	119.244	120.863	134.552				-3.93628	110.089	5.76039	3	114.768	5.30746	3	121.382	6.81737	3
46	-3.86777		100.182	101.645	112.776	111.211	119.2	119.786	118.288	119.586	134.864				-3.86777	109.894	5.26828	3	113.477	5.9172	3	122.476	6.51642	3
47	-3.79925		100.303	106.25	111.809	111.704	120.471	119.43	117.897	119.938	134.909				-3.79925	109.968	5.15278	3	115.553	4.65404	3	122.049	6.79554	3
48	-3.73075		99.4549	104.03	114.986	111.211	119.529	115.412	118.288	116.769	134.641				-3.73075	109.651	5.4924	3	113.443	4.77356	3	121.68	6.48183	3
49	-3.66225		101.03	103.372	111.671	111.166	121.929	117.65	117.376	119.41	136.023				-3.66225	109.857	4.76398	3	114.904	5.81171	3	121.782	7.32701	3
50	-2.4439		120.23	123.355	136.119	111.57	118.165	116.226	117.55	117.606	119.215				-2.4439	116.45	2.55992	3	119.709	1.83051	3	123.853	6.19317	3
51	-2.37565		124.349	120.806	138.95	113.587	118.353	115.158	114.813	115.801	121.043				-2.37565	117.583	3.40132	3	118.32	1.44486	3	125.05	7.15461	3
52	-2.30713		122.592	122.451	136.74	113.004	116.753	115.666	113.51	115.493	117.7				-2.30713	116.369	3.11514	3	118.232	2.14038	3	123.369	6.71151	3
53	-2.23863		117.505	122.451	136.533	109.462	115.247	112.513	114.031	116.901	117.254				-2.23863	113.666	2.32888	3	118.2	2.17847	3	122.1	7.34526	3
54	-2.17012		118.534	119.572	136.119	111.435	116.282	117.752	111.729	115.449	116.942				-2.17012	113.899	2.31897	3	117.101	1.25879	3	123.604	6.26174	3
55	-2.1016		123.077	121.135	137.017	112.96	114.494	114.039	111.99	113.644	116.228				-2.1016	116.009	3.54518	3	116.424	2.36796	3	122.428	7.3217	3
56	-2.03308		122.471	123.273	134.323	109.283	115.482	115.514	112.381	112.72	117.298				-2.03308	114.711	3.98164	3	117.159	3.15953	3	122.378	5.99458	3
57	-1.96457		118.837	122.451	135.083	111.076	114.871	116.124	111.729	111.444	115.961				-1.96457	113.881	2.48534	3	116.255	3.25197	3	122.389	6.34699	3
58	-1.89605		117.626	121.875	135.981	110.583	116.188	115.972	109.427	115.317	114.712				-1.89605	112.545	2.56214	3	117.793	2.05626	3	122.222	6.88918	3
59	-1.82755		120.896	121.135	134.116	108.251	114.918	114.802	111.555	113.116	115.426				-1.82755	113.568	3.78652	3	116.39	2.42898	3	121.448	6.33666	3
60	-1.75903		119.14	121.546	133.633	109.507	114.4	114.039	109.818	113.116	115.56				-1.75903	112.821	3.16054	3	116.354	2.62232	3	121.077	6.29317	3
61	-1.69052		120.957	122.039	131.492	110.448	114.4	117.141	110.035	110.651	118.324				-1.69052	113.813	3.57379	3	115.697	3.35081	3	122.319	4.59906	3
62	-1.62202		120.048	119.572	130.87	110.135	113.365	116.124	110.078	114.613	116.674				-1.62202	113.42	3.31409	3	115.85	1.89578	3	121.223	4.82631	3
63	-1.55323		120.048	118.503	132.873	111.57	114.306	114.751	110.556	110.871	116.228				-1.55323	114.058	3.00951	3	114.56	2.20678	3	121.284	5.81013	3
64	-1.48497		120.594	116.612	131.975	110.179	112.753	116.48	108.558	110.387	112.84				-1.48497	113.11	3.77084	3	113.251	1.81401	3	120.432	5.86657	3
65	-1.41645		117.383	121.464	131.285	109.507	114.588	118.464	109.296	110.431	115.47				-1.41645	112.062	2.66133	3	115.494	3.21688	3	121.74	4.85005	3
66	-1.34792		118.11	119.243	130.525	110.538	115.529	112.36	107.732	109.683	113.152				-1.34792	112.127	3.09935	3	114.819	2.78261	3	118.679	5.92736	3
67	-1.2794		117.262	120.724	131.354	108.251	112.094	115.209	108.254	108.759	115.292				-1.2794	111.256	3.0033	3	113.859	3.5649	3	120.618	5.36784	3
68	-1.21087		117.747	120.806	129.351	107.713	112.565	114.293	108.427	110.431	112.795				-1.21087	111.296	3.2321	3	114.601	3.16317	3	118.813	5.28657	3
69	-1.14235		119.079	120.312	130.939	108.251	109.412	115.717	105.56	108.979	114.311				-1.14235	110.964	4.13152	3	112.901	3.70782	3	120.323	5.32383	3
70	0		100	100	100	100	100	100	100	100	100				0	100	0	3	100	0	3	100	0	3
71	0.06835		103.513	98.3553	101.865	100.673	99.9529	99.2879	101.52	96.3908	101.516				0.06835	101.902	0.841859	3	98.233	1.0301	3	100.889	0.807076	3
72	0.136617		99.6972	97.2039	97.5829	100.135	100.094	99.6948	98.523	97.4472	99.5988				0.136617	99.4516	0.481129	3	98.2484	0.925512	3	98.9588	0.688529	3
73	0.205283		101.757	97.0395	100.345	100.448	100.612	100.305	97.3067	97.6673	99.2421				0.205283	99.8372	1.3204	3	98.4395	1.10116	3	99.9642	0.361239	3
74	0.2735		100.303	97.1217	97.7901	98.6099	97.4588	96.1851	98.7402	96.1268	100.178				0.2735	99.2176	0.543887	3	96.9024	0.399858	3	98.0512	1.16009	3
75	0.342033		102.544	94.4901	97.8591	99.8206	100.471	97.5585	98.1321	96.1268	96.5225				0.342033	100.166	1.28521	3	97.0292	1.7844	3	97.3134	0.404843	3
76	0.41055		99.2126	96.3816	98.5497	100.762	98.4	100.458	96.4813	95.2025	96.8346				0.41055	98.8187	1.2514	3	96.6613	0.933589	3	98.614	1.04642	3
77	0.479233		99.2126	95.0658	98.826	99.4619	97.0824	99.4914	97.8714	95.8627	96.4779				0.479233	98.8486	0.493877	3	96.0036	0.58638	3	98.2651	0.913988	3
78	0.547683		99.0915	94.8191	96.8232	100.224	96.8471	98.9827	97.1329	95.9947	97.2358				0.547683	98.8162	0.902924	3	95.887	0.587902	3	97.6806	0.661871	3
79	0.616217		101.03	92.7632	96.6851	100.135	96.7529	98.1689	96.6551	95.3785	95.3634				0.616217	99.2731	1.33427	3	94.9649	1.17017	3	96.7391	0.810334	3
80	0.684733		100.969	92.1053	95.2348	99.5067	97.8353	98.4741	97.0026	94.6743	95.8092				0.684733	99.1595	1.15812	3	94.8716	1.65706	3	96.506	0.997893	3
81	0.75325		98.6069	93.8322	93.7845	98.4753	96.8941	97.9145	97.5673	95.2465	95.4525				0.75325	98.2165	0.326811	3	95.3243	0.884744	3	95.7172	1.19956	3
82	0.821483		98.3646	92.1875	97.0304	100	97.8824	94.5066	96.6985	95.8627	94.8284				0.821483	98.3544	0.953069	3	95.3108	1.66696	3	95.4551	0.793094	3
83	0.89		97.4561	91.6941	92.8177	99.2825	98.1176	95.1679	94.9175	94.0141	96.0321				0.89	97.2187	1.26566	3	94.6086	1.878	3	94.6725	0.960403	3
84	0.958517		100.061	92.023	91.8508	99.2377	96.2353	95.9308	94.6568	97.5792	95.7646				0.958517	97.985	1.68098	3	95.2792	1.67366	3	94.5154	1.33316	3
85	1.02705		95.8813	90.2138	93.3702	99.5516	96.9412	96.4395	97.6542	94.6303	95.0067				1.02705	97.6957	1.05972	3	93.9284	1.97347	3	94.9388	0.886681	3
86	1.09555		96.1841	91.6118	91.3674	98.3408	96.4235	96.7955	96.351	93.5299	94.0259				1.09555	96.9586	0.692758	3	93.8551	1.3985	3	94.0629	1.56707	3
87	1.16407		97.3349	91.3651	91.7818	98.2511	96.1882	97.4059	94.5699	90.9331	92.1534				1.16407	96.7187	1.10644	3	92.8288	1.68433	3	93.7803	1.81595	3
88	1.23258		95.7601	91.3651	92.3343	96.9507	96.8941	95.2696	95.656	93.0458	91.9305				1.23258	96.1223	0.415297	3	93.7683	1.63646	3	93.1781	1.05222	3
89	1.3011		95.5179	88.898	91.5055	98.3857	96.0471	94.3032	97.6542	92.4296	94.0259				1.3011	97.1859	0.860333	3	92.4582	2.0638	3	93.2782	0.889936	3
90	1.36962		95.3967	88.5691	91.6436	98.5202	94.7765	97.1516	93.7011	91.7254	95.0513				1.36962	95.8727	1.41135	3	91.6903	1.792	3	94.6155	1.60486	3
91	1.43815		96.3658	89.8026	92.4033	96.9955	96.7059	92.2177	95.2215	90.2289	94.5609				1.43815	96.1943	0.519234	3	92.2458	2.23344	3	93.0606	0.75203	3
92	1.50667		96.0024	91.4474	90.6768	97.713	96.8	93.591	92.8323	89.9648	93.9367				1.50667	95.5159	1.42978	3	92.7374	2.0759	3	92.7348	1.03385	3
93	1.57547		95.1545	90.1316	89.4337	95.7399	93.9765	93.235	92.702	89.7007	91.6184				1.57547	94.5321	0.930537	3	91.2696	1.35915	3	91.429	1.10141	3
94	1.64372		93.9431	89.5559	91.5746	98.0717	94.2588	93.235	93.7446	89.9648	93.8475				1.64372	95.2531	1.41048	3	91.2598	1.50413	3	92.8857	0.678986	3
95	1.71223		97.3349	90.2138	90.3315	98.1166	96.7529	94.2014	92.311	90.4489	93.3125				1.71223	95.9209	1.81896	3	92.4719	2.1416	3	92.6151	1.17031	3
96	1.78077		94.9122	88.898	92.058	98.0717	93.6	95.3713	93.1798	91.5053	92.9113				1.78077	95.3879	1.43207	3	91.3344	1.36003	3	93.4469	0.993249	3
97	1.84928		96.5475	88.5691	88.1215	97.6233	93.0824	93.591	93.9618	90.3609	90.9496				1.84928	96.0442	1.08655	3	90.6708	1.31205	3	90.8874	1.57922	3
98	1.9178		94.4882	86.8421	90.3315	96.9058	94.9176	93.1841	93.3536	89.0845	92.5546				1.9178	94.9159	1.0475	3	90.2814	2.4068	3	92.0234	0.865259	3
99	1.98632		95.8813	88.9803	86.8785	96.1883	93.5529	92.7772	92.5717	89.3046	92.4654				1.98632	94.8804	1.15777	3	90.6126	1.47315	3	90.707	1.91641	3
100	2.05485		96.1236	89.3092	86.395	97.6233	94.0235	93.8454	92.2676	88.6004	92.1088				2.05485	95.3382	1.59516	3	90.6444	1.70193	3	90.7831	2.25056	3
101	2.1233		97.6984	88.1579	88.2597	96.0538	94.1176	93.591	91.0513	88.8644	90.2363				2.1233	94.9345	1.99881	3	90.38	1.87993	3	90.6957	1.55608	3
102	2.19182		94.3671	86.2664	88.1906	97.6233	92.2824	90.4883	93.5708	88.8644	88.988				2.19182	95.1871	1.23963	3	89.1377	1.74201	3	89.2223	0.673555	3
103	2.2605		96.7898	87.6645	87.9144	97.0852	93.6	93.6419	93.1364	89.1725	88.7205				2.2605	95.6705	1.2699	3	90.1457	1.78119	3	90.0922	1.79002	3
104	2.32898		93.8219	87.3355	86.7403	96.5919	93.3176	91.6073	92.3979	87.0158	88.5867				2.32898	94.2706	1.23132	3	89.223	2.0494	3	88.9781	1.41854	3
105	2.39748		93.2768	86.6776	85.5663	94.4843	92.5647	92.472	93.5708	89.0405	90.6375				2.39748	93.7773	0.363544	3	89.4276	1.71044	3	89.5586	2.06521	3
106	2.46598		94.9122	85.9375	87.7762	96.2332	92.3294	93.9471	93.4405	88.1602	90.5484				2.46598	94.8619	0.806571	3	88.809	1.87349	3	90.7572	1.78443	3
107	2.5345		97.5772	87.5822	89.0193	96.0538	93.9765	92.5229	93.3536	86.6197	89.8796				2.5345	95.6616	1.23493	3	89.3928	2.30861	3	90.474	1.05414	3
108	2.6028		94.5488	86.8421	86.8785	95.6054	92.7059	89.7762	92.5282	88.5563	89.2109				2.6028	94.2275	0.902704	3	89.3681	1.74071	3	88.6218	0.886841	3
109	2.67132		96.7293	85.9375	86.1188	97.2646	92.6588	89.3184	91.6594	88.6444	89.6121				2.67132	95.2177	1.78586	3	89.0802	1.95248	3	88.3498	1.11871	3
110	2.73983		96.8504	85.9375	87.3619	95.426	93.9294	90.1322	91.5725	87.8081	88.988				2.73983	94.6163	1.57645	3	89.225	2.41339	3	88.8274	0.803758	3
111	2.80835		97.6984	86.4309	87.2238	96.1435	91.5294	90.3357	91.4422	89.0405	89.5675				2.80835	95.0947	1.88059	3	89.0003	1.47194	3	89.0423	0.935938	3
112	2.87688		93.7614	87.3355	86.1878	96.5919	95.0588	92.7772	93.093	88.8204	90.1025				2.87688	94.4821	1.07242	3	90.4049	2.3661	3	89.6892	1.91338	3
113	2.94567		94.1853	85.6908	86.1188	96.861	92.8941	90.59	91.8766	88.7324	87.6059				2.94567	94.3077	1.44016	3	89.1058	2.08779	3	88.1049	1.31463	3
114	3.01392		97.1532	85.3618	86.9475	94.7982	91.8588	87.6399	93.9183	89.4366	87.6059				3.01392	95.2899	0.96566	3	88.8858	1.89563	3	87.3978	0.225337	3
115	3.08245		92.55	85.5263	86.1188	95.0224	92.0471	89.4201	93.3102	87.8961	88.3638				3.08245	93.6275	0.73116	3	88.4898	1.90564	3	87.9676	0.973395	3
116	3.15097		95.215	87.1711	85.5663	97.6233	92.1882	89.2675	92.6151	86.5317	87.6505				3.15097	95.1512	1.4461	3	88.6303	1.78851	3	87.4948	1.07129	3
117	3.2195		94.0642	84.8684	85.0829	95.6951	94.6824	92.2686	94.7003	88.0282	88.0963				3.2195	94.8198	0.474573	3	89.193	2.89228	3	88.4826	2.08331	3
118	3.28802		92.2471	84.8684	85.5663	97.6682	91.0588	89.7762	91.616	86.7077	87.6951				3.28802	93.8438	1.92086	3	87.545	1.83539	3	87.6792	1.21532	3
119	3.35653		93.7008	85.0329	85.221	96.4574	91.5294	89.9797	93.1798	87.0158	86.848				3.35653	94.446	1.01688	3	87.8594	1.92223	3	87.3495	1.39641	3
120	3.42528		93.7008	86.0197	84.9448	97.6233	90.3059	87.9959	92.5282	88.0282	89.0325				3.42528	94.6175	1.54058	3	88.1179	1.23812	3	87.3244	1.22688	3
121	3.49355		92.9134	83.6349	84.8066	95.9193	91.9059	87.8433	92.4414	86.1796	85.4213				3.49355	93.758	1.08919	3	87.2401	2.44581	3	86.0238	0.926932	3
122	3.56238		92.4894	83.2237	84.116	94.8879	92.5647	86.8769	91.7463	86.7077	86.6696				3.56238	93.0412	0.947935	3	87.4987	2.72537	3	85.8875	0.88777	3
123	3.63082		94.3065	85.8553	82.8039	94.6637	91.4353	90.1831	89.8784	86.4437	87.3384				3.63082	92.9495	1.53903	3	87.9114	1.77011	3	86.7751	2.14874	3
124	3.69905		94.3671	85.1974	83.7017	94.843	90.4941	90.1831	90.6169	87.7641	87.9626				3.69905	93.2756	1.33648	3	87.8185	1.52928	3	87.2824	1.90168	3
125	3.7677		95.5784	85.6908	83.2182	96.9955	90.7765	88.352	90.8775	86.6197	86.7588				3.7677	94.4838	1.84898	3	87.6957	1.56357	3	86.1097	1.51711	3
126	3.83615		96.487	84.0461	84.8757	96.6368	90.2118	87.0295	90.53	87.412	86.4467				3.83615	94.5512	2.0111	3	87.2233	1.78239	3	86.1173	0.643198	3
127	3.9047		94.1248	81.9901	83.9779	96.3229	90.4941	90.7935	92.1373	86.7958	84.5296				3.9047	94.195	1.20879	3	86.4267	2.46182	3	86.4337	2.18572	3
128	3.97322		92.9134	84.7862	84.3232	95.1121	89.5529	89.7762	89.6177	85.1232	83.1476				3.97322	92.5477	1.5966	3	86.4875	1.53583	3	85.749	2.042	3
129	4.042		90.9146	86.9243	83.5635	94.3946	90.2588	87.6907	91.0947	87.632	86.7588				4.042	92.1346	1.13119	3	88.2717	1.01433	3	86.0044	1.24971	3
130	4.11025		93.8825	84.4572	82.8729	95.7399	89.3176	90.9969	90.0956	85.2113	82.8355				4.11025	93.2393	1.66081	3	86.3287	1.51023	3	85.5685	2.71427	3
131	4.17877		93.3979	83.8816	83.3564	98.0717	91.2	87.4873	90.0521	86.7518	84.2176				4.17877	93.8406	2.32562	3	87.2778	2.12895	3	85.0204	1.25825	3
132	4.2473		93.0345	83.9638	82.8729	93.8117	90.6353	88.5046	92.3979	86.4437	86.2684				4.2473	93.0814	0.408786	3	87.0143	1.9469	3	85.882	1.63716	3
133	4.31582		96.8504	81.9079	83.4254	95.7848	89.0824	89.9797	89.8349	86.0035	85.7334				4.31582	94.1567	2.18267	3	85.6646	2.07801	3	86.3795	1.91943	3
134	4.38435		92.7922	81.6612	81.6298	95.157	90.0235	88.0977	90.7906	86.7077	85.1092				4.38435	92.9133	1.2619	3	86.1308	2.43118	3	84.9456	1.86889	3
135	4.45287		94.1248	84.7039	81.3536	96.9507	90.6353	87.9451	91.3553	87.1919	84.3959				4.45287	94.1436	1.61526	3	87.5104	1.71962	3	84.5649	1.90467	3
136	4.5214		92.0048	82.977	82.1133	95.7399	90.4941	90.3866	91.9201	87.2359	84.0392				4.5214	93.2216	1.25939	3	86.9023	2.17641	3	85.513	2.4994	3
137	4.58992		93.0345	81.5789	83.3564	95.426	90.5882	87.6907	91.0947	84.507	83.2813				4.58992	93.1851	1.25261	3	85.5581	2.65332	3	84.7761	1.45746	3
138	4.65845		93.2768	82.977	82.5967	93.0045	90.6824	86.1139	90.3128	83.7588	83.1922				4.65845	92.198	0.945896	3	85.806	2.44858	3	83.9676	1.08685	3
139	4.72697		95.1545	81.7434	80.732	95.8296	90.9647	85.9105	90.9644	84.331	83.0138				4.72697	93.9828	1.52175	3	85.6797	2.74605	3	83.2188	1.4984	3
140	4.79547		92.2471	81.1678	81.2845	94.3049	89.4118	88.0468	90.4865	85.5634	81.7655				4.79547	92.3462	1.10339	3	85.381	2.38158	3	83.6989	2.17836	3
141	4.864		91.702	82.977	79.9033	95.4709	89.6941	86.6734	90.2259	84.9032	81.9438				4.864	92.4662	1.56157	3	85.8581	1.99699	3	82.8402	2.0051	3
142	4.93253		94.0036	83.3882	80.1105	97.6682	89.0353	86.6226	92.6586	83.2306	85.5551				4.93253	94.7768	1.49692	3	85.218	1.90917	3	84.096	2.01646	3
143	5.00103		91.278	82.8947	79.8343	93.8117	90.0706	85.1475	90.0087	84.9912	81.0967				5.00103	91.6995	1.11786	3	85.9855	2.13031	3	82.0262	1.60266	3
144	5.06957		94.4882	81.7434	81.2155	93.8565	89.9765	86.9278	88.8792	85.4313	81.9438				5.06957	92.408	1.77377	3	85.7171	2.38097	3	83.3624	1.79506	3
145	5.13808		94.1248	81.4967	79.6271	94.6637	90.3529	88.0468	89.9218	86.4437	83.9055				5.13808	92.9034	1.4989	3	86.0978	2.56242	3	83.8598	2.43067	3
146	5.2066		91.5203	80.4276	78.8674	96.6816	89.7882	85.6562	89.8784	83.4507	83.1476				5.2066	92.6934	2.04965	3	84.5555	2.75806	3	82.557	1.98186	3
147	5.27512		90.7935	80.4276	79.3508	94.574	91.3882	87.7925	89.4874	84.9472	81.0522				5.27512	91.6183	1.52519	3	85.5877	3.18022	3	82.7318	2.57755	3
148	5.34363		92.7922	81.7434	81.9061	95.3363	87.5765	85.8087	88.0973	85.0352	83.9947				5.34363	92.0753	2.12025	3	84.785	1.6885	3	83.9032	1.12753	3
149	5.41217		93.1557	82.3191	78.7293	95.2915	90.2118	85.707	89.8784	84.9472	82.3005				5.41217	92.7752	1.57417	3	85.826	2.32041	3	82.2456	2.01449	3
150	6.63178		69.2913	4.52303	3.72928	90.4036	36.8941	10.6816	86.5334	16.7254	10.8337				6.63178	82.0761	6.48929	3	19.3808	9.43858	3	8.41486	2.3432	3
151	6.70005		69.4125	4.60526	3.59116	89.5067	37.4588	11.8515	85.3171	18.3979	11.7254				6.70005	81.4121	6.1205	3	20.154	9.52456	3	9.056	2.73266	3
152	6.76857		69.7759	5.09868	3.10773	90.5381	38.0706	11.2411	86.4031	18.3539	12.617				6.76857	82.239	6.34487	3	20.5077	9.5789	3	8.98862	2.96715	3
153	6.8371		68.1405	4.60526	3.03867	88.565	37.9765	10.7833	86.0122	18.882	13.6424				6.8371	80.9059	6.42509	3	20.4879	9.66684	3	9.15481	3.16749	3
154	6.90562		70.745	4.52303	2.83149	88.6996	38.7294	9.86775	87.4457	19.3662	12.8845				6.90562	82.2968	5.78721	3	20.8729	9.90323	3	8.52792	2.97838	3
155	6.97413		68.2617	4.60526	2.96961	89.6861	39.2471	9.71516	86.5769	19.1021	12.4833				6.97413	81.5082	6.68382	3	20.9848	10.0444	3	8.38935	2.82523	3
156	7.04265		70.9267	4.6875	2.62431	89.8655	40.7059	10.0203	86.2294	19.4102	12.9291				7.04265	82.3405	5.80263	3	21.6012	10.4552	3	8.52459	3.06731	3
157	7.11117		69.9576	4.85197	2.41713	86.6816	41.1765	9.40997	86.5334	18.5739	11.6362				7.11117	81.0576	5.55014	3	21.5341	10.5899	3	7.8211	2.77736	3
158	7.17968		68.8068	5.01645	2.69337	89.8206	42.2118	9.40997	86.49	18.4419	10.7891				7.17968	81.7058	6.52079	3	21.89	10.8749	3	7.63082	2.50062	3
159	7.2482		70.1393	4.6875	2.55525	89.5067	42.2118	9.56256	86.1425	18.0458	10.2095				7.2482	81.9295	5.97456	3	21.6483	10.9811	3	7.44245	2.45073	3
160	7.31673		68.9279	4.93421	2.41713	88.6547	42.1176	9.66429	86.1425	17.6496	10.0312				7.31673	81.2417	6.19946	3	21.5672	10.9112	3	7.37088	2.47914	3
			Mn Concentrations
			0	50	400	0	50	400	0	50	400
			1977	1524	1899	2836	2771	2538	3231	3226	3258
			1962	1509	1891	2756	2724	2558	3255	3228	3208
			1976	1506	1872	2768	2771	2494	3262	3207	3219
			1959	1504	1881	2681	2709	2542	3203	3271	3209
			1931	1476	1904	2664	2740	2482	3177	3186	3230
			1924	1455	1888	2716	2687	2510	3208	3203	3210
			1923	1492	1892	2681	2742	2493	3167	3150	3193
			1920	1469	1844	2647	2749	2527	3209	3215	3162
			1908	1475	1850	2705	2710	2435	3160	3154	3170
			1962	1500	1852	2689	2660	2493	3112	3183	3146
			1909	1469	1846	2650	2653	2503	3114	3174	3227
			1899	1462	1855	2604	2656	2502	3079	3205	3162
			1876	1442	1857	2666	2681	2430	3132	3092	3174
			1868	1463	1863	2626	2677	2437	3040	3146	3180
			1855	1470	1824	2615	2699	2462	3061	3105	3177
			1861	1433	1829	2576	2678	2487	3048	3079	3181
			1847	1431	1842	2589	2655	2420	3071	3126	3107
			1821	1430	1807	2620	2635	2463	3013	3046	3161
			1818	1412	1826	2604	2651	2434	3035	3021	3162
			1821	1418	1855	2523	2636	2456	3071	3000	3128
			1820	1424	1802	2576	2652	2394	2987	2985	3121
			1810	1415	1775	2582	2646	2409	2978	2976	3092
			1775	1370	1745	2546	2591	2387	2979	3008	3225
			1818	1377	1740	2554	2661	2410	3023	2980	3142
			1806	1363	1759	2555	2594	2347	2963	2982	3111
			1771	1388	1715	2591	2610	2406	2971	2941	3095
			1757	1335	1722	2512	2592	2356	2885	2926	3167
			1797	1351	1771	2549	2582	2362	2864	2940	3129
			1779	1360	1726	2547	2606	2338	2887	2964	3156
			1756	1332	1707	2539	2596	2377	2950	2874	3063
			1729	1334	1671	2526	2555	2347	2837	2923	3120
			1768	1329	1698	2533	2556	2398	2829	2900	3117
			1740	1339	1671	2508	2595	2351	2866	2848	3119
			1768	1314	1677	2523	2644	2328	2837	2886	3102
			1664	1270	1700	2512	2570	2386	2860	2822	3138
			1717	1281	1636	2531	2570	2318	2810	2810	3044
			1702	1301	1673	2542	2551	2310	2764	2827	3045
			1694	1310	1635	2492	2655	2324	2768	2786	3072
			1665	1297	1662	2540	2583	2363	2794	2768	3070
			1665	1287	1649	2532	2587	2326	2767	2788	3026
			1718	1305	1651	2523	2574	2321	2781	2832	3032
			1632	1303	1615	2501	2561	2308	2774	2798	3029
			1677	1287	1615	2478	2571	2331	2742	2763	3023
			1663	1236	1674	2491	2515	2287	2773	2829	3024
			1642	1267	1618	2488	2534	2317	2745	2746	3018
			1654	1236	1633	2480	2533	2355	2723	2717	3025
			1656	1292	1619	2491	2560	2348	2714	2725	3026
			1642	1265	1665	2480	2540	2269	2723	2653	3020
			1668	1257	1617	2479	2591	2313	2702	2713	3051
			1985	1500	1971	2488	2511	2285	2706	2672	2674
			2053	1469	2012	2533	2515	2264	2643	2631	2715
			2024	1489	1980	2520	2481	2274	2613	2624	2640
			1940	1489	1977	2441	2449	2212	2625	2656	2630
			1957	1454	1971	2485	2471	2315	2572	2623	2623
			2032	1473	1984	2519	2433	2242	2578	2582	2607
			2022	1499	1945	2437	2454	2271	2587	2561	2631
			1962	1489	1956	2477	2441	2283	2572	2532	2601
			1942	1482	1969	2466	2469	2280	2519	2620	2573
			1996	1473	1942	2414	2442	2257	2568	2570	2589
			1967	1478	1935	2442	2431	2242	2528	2570	2592
			1997	1484	1904	2463	2431	2303	2533	2514	2654
			1982	1454	1895	2456	2409	2283	2534	2604	2617
			1982	1441	1924	2488	2429	2256	2545	2519	2607
			1991	1418	1911	2457	2396	2290	2499	2508	2531
			1938	1477	1901	2442	2435	2329	2516	2509	2590
			1950	1450	1890	2465	2455	2209	2480	2492	2538
			1936	1468	1902	2414	2382	2265	2492	2471	2586
			1944	1469	1873	2402	2392	2247	2496	2509	2530
			1966	1463	1896	2414	2325	2275	2430	2476	2564
			1651	1216	1448	2230	2125	1966	2302	2272	2243
			1709	1196	1475	2245	2124	1952	2337	2190	2277
			1646	1182	1413	2233	2127	1960	2268	2214	2234
			1680	1180	1453	2240	2138	1972	2240	2219	2226
			1656	1181	1416	2199	2071	1891	2273	2184	2247
			1693	1149	1417	2226	2135	1918	2259	2184	2165
			1638	1172	1427	2247	2091	1975	2221	2163	2172
			1638	1156	1431	2218	2063	1956	2253	2178	2164
			1636	1153	1402	2235	2058	1946	2236	2181	2181
			1668	1128	1400	2233	2056	1930	2225	2167	2139
			1667	1120	1379	2219	2079	1936	2233	2151	2149
			1628	1141	1358	2196	2059	1925	2246	2164	2141
			1624	1121	1405	2230	2080	1858	2226	2178	2127
			1609	1115	1344	2214	2085	1871	2185	2136	2154
			1652	1119	1330	2213	2045	1886	2179	2217	2148
			1583	1097	1352	2220	2060	1896	2248	2150	2131
			1588	1114	1323	2193	2049	1903	2218	2125	2109
			1607	1111	1329	2191	2044	1915	2177	2066	2067
			1581	1111	1337	2162	2059	1873	2202	2114	2062
			1577	1081	1325	2194	2041	1854	2248	2100	2109
			1575	1077	1327	2197	2014	1910	2157	2084	2132
			1591	1092	1338	2163	2055	1813	2192	2050	2121
			1585	1112	1313	2179	2057	1840	2137	2044	2107
			1571	1096	1295	2135	1997	1833	2134	2038	2055
			1551	1089	1326	2187	2003	1833	2158	2044	2105
			1607	1097	1308	2188	2056	1852	2125	2055	2093
			1567	1081	1333	2187	1989	1875	2145	2079	2084
			1594	1077	1276	2177	1978	1840	2163	2053	2040
			1560	1056	1308	2161	2017	1832	2149	2024	2076
			1583	1082	1258	2145	1988	1824	2131	2029	2074
			1587	1086	1251	2177	1998	1845	2124	2013	2066
			1613	1072	1278	2142	2000	1840	2096	2019	2024
			1558	1049	1277	2177	1961	1779	2154	2019	1996
			1598	1066	1273	2165	1989	1841	2144	2026	1990
			1549	1062	1256	2154	1983	1801	2127	1977	1987
			1540	1054	1239	2107	1967	1818	2154	2023	2033
			1567	1045	1271	2146	1962	1847	2151	2003	2031
			1611	1065	1289	2142	1997	1819	2149	1968	2016
			1561	1056	1258	2132	1970	1765	2130	2012	2001
			1597	1045	1247	2169	1969	1756	2110	2014	2010
			1599	1045	1265	2128	1996	1772	2108	1995	1996
			1613	1051	1263	2144	1945	1776	2105	2023	2009
			1548	1062	1248	2154	2020	1824	2143	2018	2021
			1555	1042	1247	2160	1974	1781	2115	2016	1965
			1604	1038	1259	2114	1952	1723	2162	2032	1965
			1528	1040	1247	2119	1956	1758	2148	1997	1982
			1572	1060	1239	2177	1959	1755	2132	1966	1966
			1553	1032	1232	2134	2012	1814	2180	2000	1976
			1523	1032	1239	2178	1935	1765	2109	1970	1967
			1547	1034	1234	2151	1945	1769	2145	1977	1948
			1547	1046	1230	2177	1919	1730	2130	2000	1997
			1534	1017	1228	2139	1953	1727	2128	1958	1916
			1527	1012	1218	2116	1967	1708	2112	1970	1944
			1557	1044	1199	2111	1943	1773	2069	1964	1959
			1558	1036	1212	2115	1923	1773	2086	1994	1973
			1578	1042	1205	2163	1929	1737	2092	1968	1946
			1593	1022	1229	2155	1917	1711	2084	1986	1939
			1554	997	1216	2148	1923	1785	2121	1972	1896
			1534	1031	1221	2121	1903	1765	2063	1934	1865
			1501	1057	1210	2105	1918	1724	2097	1991	1946
			1550	1027	1200	2135	1898	1789	2074	1936	1858
			1542	1020	1207	2187	1938	1720	2073	1971	1889
			1536	1021	1200	2092	1926	1740	2127	1964	1935
			1599	996	1208	2136	1893	1769	2068	1954	1923
			1532	993	1182	2122	1913	1732	2090	1970	1909
			1554	1030	1178	2162	1926	1729	2103	1981	1893
			1519	1009	1189	2135	1923	1777	2116	1982	1885
			1536	992	1207	2128	1925	1724	2097	1920	1868
			1540	1009	1196	2074	1927	1693	2079	1903	1866
			1571	994	1169	2137	1933	1689	2094	1916	1862
			1523	987	1177	2103	1900	1731	2083	1944	1834
			1514	1009	1157	2129	1906	1704	2077	1929	1838
			1552	1014	1160	2178	1892	1703	2133	1891	1919
			1507	1008	1156	2092	1914	1674	2072	1931	1819
			1560	994	1176	2093	1912	1709	2046	1941	1838
			1554	991	1153	2111	1920	1731	2070	1964	1882
			1511	978	1142	2156	1908	1684	2069	1896	1865
			1499	978	1149	2109	1942	1726	2060	1930	1818
			1532	994	1186	2126	1861	1687	2028	1932	1884
			1538	1001	1140	2125	1917	1685	2069	1930	1846
			1144	55	54	2016	784	210	1992	380	243
			1146	56	52	1996	796	233	1964	418	263
			1152	62	45	2019	809	221	1989	417	283
			1125	56	44	1975	807	212	1980	429	306
			1168	55	41	1978	823	194	2013	440	289
			1127	56	43	2000	834	191	1993	434	280
			1171	57	38	2004	865	197	1985	441	290
			1155	59	35	1933	875	185	1992	422	261
			1136	61	39	2003	897	185	1991	419	242
			1158	57	37	1996	897	188	1983	410	229
			1138	60	35	1977	895	190	1983	401	225

## Sheet: Figure5D
SiNRAT1-T241A
LPR50
Mn
																		Condition
			Mn Concentrations															Mean	SEM	N
Cycle Nr.	Time (min)		0	50	400	0	50	400	0	50	400	0	50	400			Time (min)	0 µM Mn2+			50 μM Mn2+			400 μM Mn2+
1	-6.95145		115.521	121.19	112.275	124.259	119.291	117.243	117.973	123.86	131.511	137.779	147.017	139.536			-6.95145	123.883	4.98412	4	127.84	6.46087	4	125.141	6.29611	4
2	-6.8828		117.855	117.659	113.046	123.353	116.093	115.835	117.291	125.334	131.175	141.83	151.466	138.328			-6.8828	125.082	5.7475	4	127.638	8.19537	4	124.596	6.06901	4
3	-6.81432		114.259	116.612	113.303	122.364	116.728	115.352	116.312	123.353	125.132	137.187	145.45	138.328			-6.81432	122.53	5.1796	4	125.536	6.82238	4	123.029	5.71545	4
4	-6.74607		113.123	116.154	111.311	123.188	114.063	115.835	117.206	120.866	125.659	135.23	149.444	137.941			-6.74607	122.187	4.81391	4	125.132	8.22793	4	122.687	5.90114	4
5	-6.67755		113.943	115.762	109.961	121.829	115.724	114.748	117.121	120.912	126.619	138.598	146.36	138.038			-6.67755	122.873	5.48632	4	124.689	7.32557	4	122.342	6.29541	4
6	-6.60903		113.691	117.07	112.789	122.302	117.548	116.298	117.888	119.023	126.379	135.048	146.057	137.893			-6.60903	122.232	4.61947	4	124.925	7.05626	4	123.34	5.64157	4
7	-6.54027		113.312	115.5	113.882	121.273	117.507	115.996	116.652	118.563	125.564	136.732	146.158	137.409			-6.54027	121.992	5.17711	4	124.432	7.26969	4	123.213	5.37138	4
8	-6.47202		113.565	115.435	115.296	119.625	117.364	113.561	115.545	119.3	124.892	134.911	147.068	135.138			-6.47202	120.912	4.83408	4	124.792	7.46718	4	122.222	4.97432	4
9	-6.40323		114.89	116.089	113.689	121.087	113.797	112.797	115.503	119.945	124.508	134.593	145.197	136.104			-6.40323	121.518	4.57576	4	123.757	7.25847	4	121.775	5.46806	4
10	-6.33487		116.341	116.416	113.175	119.811	109.574	112.978	115.758	119.76	123.405	133.546	144.793	134.509			-6.33487	121.364	4.15799	4	122.636	7.68387	4	121.017	5.11433	4
11	-6.26633		113.186	115.37	112.339	117.751	109.328	111.328	115.417	116.813	123.165	136.959	147.219	136.201			-6.26633	120.829	5.45715	4	122.182	8.50171	4	120.758	5.80291	4
12	-6.19777		112.871	114.388	111.118	118.081	108.467	111.107	115.034	116.859	120.048	136.322	144.54	135.766			-6.19777	120.577	5.35612	4	121.063	8.02112	4	119.51	5.81369	4
13	-6.12923		110.726	110.595	112.725	119.337	108.159	111.288	115.417	118.102	120.48	135.958	140.698	132.866			-6.12923	120.359	5.48937	4	119.389	7.41147	4	119.34	4.94008	4
14	-6.06095		110.915	116.678	113.625	117.339	110.599	110.382	113.33	116.674	123.837	133.682	142.113	132.383			-6.06095	118.817	5.12922	4	121.516	7.0136	4	120.057	5.00988	4
15	-5.99238		112.808	113.931	112.789	117.689	108.139	108.773	116.652	115.753	120	135.457	144.641	135.379			-5.99238	120.652	5.04568	4	120.616	8.17125	4	119.235	5.86115	4
16	-5.92413		112.808	112.95	114.075	115.898	108.631	108.652	116.908	121.925	119.856	134.092	141.658	131.223			-5.92413	119.926	4.80172	4	121.291	7.33195	4	118.451	4.83277	4
17	-5.85558		112.492	114.846	114.846	115.465	107.585	106.398	113.586	117.964	119.856	132.544	140.243	132.673			-5.85558	118.522	4.71429	4	120.16	7.03859	4	118.443	5.49618	4
18	-5.7872		109.527	112.753	114.46	116.557	107.913	106.459	110.733	116.26	119.952	133	140.9	132.383			-5.7872	117.454	5.40437	4	119.457	7.34972	4	118.313	5.4468	4
19	-5.71838		110.852	112.296	114.01	114.189	105.904	105.915	111.925	116.859	121.631	132.317	140.344	134.606			-5.71838	117.321	5.0469	4	118.851	7.50836	4	119.041	6.10031	4
20	-5.64983		110.789	113.8	113.817	114.333	106.253	106.6	111.116	116.766	119.808	134.411	138.979	131.803			-5.64983	117.662	5.63985	4	118.949	7.03366	4	118.007	5.33268	4
21	-5.58125		110.284	112.361	113.175	114.395	107.647	104.326	112.479	115.615	119.185	132.726	140.849	130.836			-5.58125	117.471	5.15404	4	119.118	7.42614	4	116.88	5.56341	4
22	-5.51273		115.331	111.38	111.761	114.168	107.667	104.105	111.073	116.076	119.856	133.136	138.878	132.866			-5.51273	118.427	4.98462	4	118.5	7.00699	4	117.147	6.14779	4
23	-5.44448		108.707	111.511	110.925	114.23	105.33	105.272	112.266	115.891	120.624	131.725	138.574	131.996			-5.44448	116.732	5.12679	4	117.827	7.24721	4	117.204	5.86161	4
24	-5.37595		110.158	111.903	113.175	111.429	106.499	105.352	111.286	114.463	119.76	132.817	140.091	131.996			-5.37595	116.423	5.47234	4	118.239	7.47075	4	117.571	5.63844	4
25	-5.30743		107.823	111.053	112.918	112.15	105.084	101.911	110.775	116.168	117.698	131.406	138.22	131.609			-5.30743	115.539	5.36571	4	117.631	7.22703	4	116.034	6.15441	4
26	-5.23892		110.726	110.137	113.625	111.676	107.175	102.495	111.073	116.444	120.192	131.634	135.238	131.223			-5.23892	116.277	5.12267	4	117.249	6.30012	4	116.884	6.01532	4
27	-5.17002		109.274	109.614	114.91	110.997	104.182	101.489	112.777	116.536	119.712	130.178	135.895	129.676			-5.17002	115.806	4.84344	4	116.557	6.92396	4	116.447	5.8579	4
28	-5.10175		104.858	110.53	112.725	109.988	104.08	101.087	112.606	113.128	118.082	130.132	136.4	129.918			-5.10175	114.396	5.48659	4	116.034	7.05008	4	115.453	5.98594	4
29	-5.03327		107.634	107.456	110.797	109.967	105.248	100.201	110.392	113.358	118.945	130.451	137.058	130.981			-5.03327	114.611	5.31458	4	115.78	7.2962	4	115.231	6.50267	4
30	-4.96475		104.984	110.922	113.239	111.347	104.941	100.684	110.392	114.417	117.602	131.224	134.884	128.855			-4.96475	114.487	5.75236	4	116.291	6.49908	4	115.095	5.82185	4
31	-4.89597		105.994	107.39	111.568	109.988	105.515	101.087	109.796	114.463	119.185	130.496	135.389	129.87			-4.89597	114.068	5.55263	4	115.689	6.84341	4	115.427	6.0776	4
32	-4.82742		106.057	108.568	113.625	109.082	105.064	100.664	113.245	115.799	116.163	128.084	134.176	126.631			-4.82742	114.117	4.88326	4	115.902	6.48851	4	114.271	5.33794	4
33	-4.75873		107.76	104.709	113.111	109.535	106.15	100.402	112.223	115.2	116.211	127.856	137.26	128.323			-4.75873	114.344	4.59667	4	115.83	7.51118	4	114.512	5.73493	4
34	-4.6901		106.877	106.475	112.661	109.452	103.813	98.672	112.053	115.108	116.739	126.445	134.631	126.486			-4.6901	113.707	4.3756	4	115.007	6.97144	4	113.639	5.7708	4
35	-4.62162		108.202	103.139	112.532	108.196	103.711	98.4708	113.543	114.187	117.89	126.582	133.064	127.936			-4.62162	114.131	4.33728	4	113.525	6.99039	4	114.207	6.14062	4
36	-4.55308		106.246	103.728	108.612	106.816	103.547	99.4366	110.903	113.45	114.724	124.989	133.266	129.725			-4.55308	112.238	4.37472	4	113.498	6.98367	4	113.124	6.36292	4
37	-4.4844		105.11	102.681	109.512	108.381	104.879	97.2435	109.966	112.206	116.211	125.353	133.316	127.26			-4.4844	112.203	4.49844	4	113.271	6.98521	4	112.556	6.28022	4
38	-4.41588		102.839	103.074	110.604	107.578	102.665	99.3763	111.627	114.095	117.938	126.764	133.873	127.598			-4.41588	112.202	5.17542	4	113.427	7.31138	4	113.879	5.95633	4
39	-4.34737		104.479	104.84	111.44	107.084	103.526	99.0342	111.627	114.694	115.204	123.532	134.681	123.925			-4.34737	111.681	4.21748	4	114.435	7.19411	4	112.401	5.16595	4
40	-4.27887		103.912	103.074	110.604	107.867	105.084	98.5111	112.095	114.325	116.978	126.627	132.71	124.843			-4.27887	112.625	4.95737	4	113.798	6.76309	4	112.734	5.56379	4
41	-4.21035		102.713	102.158	107.326	107.166	104.715	97.5453	111.797	111.055	116.595	126.218	131.041	125.52			-4.21035	111.974	5.09732	4	112.242	6.53941	4	111.747	6.01675	4
42	-4.14183		102.334	101.373	112.211	106.178	102.829	95.674	108.646	111.469	117.794	123.987	129.879	124.553			-4.14183	110.286	4.74799	4	111.388	6.55401	4	112.558	6.16766	4
43	-4.07332		103.785	100.719	111.44	107.722	101.989	97.0221	107.794	113.634	116.307	123.987	131.244	127.453			-4.07332	110.822	4.48715	4	111.896	7.0736	4	113.055	6.30831	4
44	-4.0048		103.47	100.589	110.54	105.807	103.547	96.4185	109.327	112.483	115.3	124.716	127.452	124.263			-4.0048	110.83	4.78247	4	111.017	6.03336	4	111.63	5.81403	4
45	-3.93628		105.994	99.6076	109.64	106.507	102.624	97.6861	111.286	114.463	116.451	125.034	129.019	123.296			-3.93628	112.205	4.43915	4	111.429	6.68267	4	111.768	5.45938	4
46	-3.86777		101.514	99.0844	112.789	105.025	102.911	96.9215	110.903	111.838	113.957	123.35	130.131	123.876			-3.86777	110.198	4.79273	4	110.991	6.91693	4	111.886	5.5738	4
47	-3.79925		101.514	101.373	107.712	105.848	103.916	97.7666	112.436	113.128	115.779	122.895	129.424	125.52			-3.79925	110.673	4.65156	4	111.96	6.34517	4	111.694	5.89962	4
48	-3.73075		101.136	98.6266	111.054	105.189	104.182	98.2294	108.901	110.594	116.691	121.165	125.935	122.523			-3.73075	109.098	4.3237	4	109.835	5.89761	4	112.124	5.18972	4
49	-3.66225		102.587	99.4768	111.311	104.963	102.706	97.4044	112.394	112.943	115.635	122.622	127.806	121.315			-3.66225	110.641	4.50668	4	110.733	6.3738	4	111.416	5.10001	4
50	-2.4439		98.5489	100	105.141	98.6614	100.062	94.1046	108.305	112.621	113.957	108.375	119.666	117.158			-2.4439	103.473	2.81033	4	108.087	4.86865	4	107.59	5.16344	4
51	-2.37565		98.4227	97.5147	106.105	98.8468	99.4875	92.7767	110.477	110.686	115.731	113.701	117.897	114.79			-2.37565	105.362	3.94013	4	106.396	4.80696	4	107.351	5.31922	4
52	-2.30713		98.0442	97.9071	103.856	98.3526	100.308	92.5956	110.988	110.917	114.149	114.929	119.06	115.176			-2.30713	105.579	4.3367	4	107.048	4.90099	4	106.444	5.27647	4
53	-2.23863		96.9085	95.4872	102.892	100.391	98.7905	92.7565	110.818	111.147	111.319	112.198	117.543	113.775			-2.23863	105.079	3.7898	4	105.742	5.17977	4	105.186	4.75337	4
54	-2.17012		99.0536	97.0569	103.792	97.9407	98.319	91.0664	108.518	108.567	113.381	112.244	117.24	115.95			-2.17012	104.439	3.52119	4	105.296	4.74266	4	106.047	5.63737	4
55	-2.1016		98.2965	96.8607	101.157	96.6021	99.4875	92.4748	110.221	109.212	112.086	109.058	117.088	115.37			-2.1016	103.544	3.54397	4	105.662	4.64351	4	105.272	5.23689	4
56	-2.03308		98.9274	95.8143	103.985	98.3526	98.7085	92.5553	109.796	110.871	113.237	110.787	116.279	114.21			-2.03308	104.466	3.37163	4	105.418	4.87292	4	105.997	5.0382	4
57	-1.96457		96.6562	97.3185	104.049	97.3023	98.2985	91.9517	112.01	110.917	111.607	110.833	115.319	109.425			-1.96457	104.2	4.17815	4	105.463	4.5142	4	104.258	4.39875	4
58	-1.89605		96.5931	94.637	101.414	97.3641	99.2005	92.5553	109.497	109.949	112.614	111.698	115.319	111.261			-1.89605	103.788	3.96018	4	104.776	4.75914	4	104.461	4.68816	4
59	-1.82755		96.7192	95.8143	99.9357	97.673	98.1345	92.7565	111.244	109.028	112.566	110.423	115.268	112.518			-1.82755	104.015	3.94513	4	104.561	4.5862	4	104.444	4.89964	4
60	-1.75903		96.2776	94.31	101.928	98.5585	98.893	92.1932	110.818	109.12	114.101	111.152	114.712	112.905			-1.75903	104.201	3.94451	4	104.259	4.66073	4	105.282	5.1514	4
61	-1.69052		96.1514	95.2256	103.47	98.229	100.492	91.8712	111.627	111.608	113.813	110.241	115.217	111.455			-1.69052	104.062	4.00012	4	105.636	4.67529	4	105.152	4.94927	4
62	-1.62202		95.8991	93.656	101.542	98.5585	98.8315	92.6559	108.22	110.318	113.765	108.967	114.459	111.503			-1.62202	102.911	3.32876	4	104.316	4.85299	4	104.867	4.85949	4
63	-1.55323		94.8896	93.7214	102.571	97.8789	97.9295	92.0926	115.758	111.101	113.285	110.378	114.863	109.377			-1.55323	104.726	4.97735	4	104.404	5.085	4	104.331	4.64145	4
64	-1.48497		95.5836	94.31	98.1362	99.0527	98.8315	90.3421	111.499	109.627	111.751	109.194	113.953	109.57			-1.48497	103.832	3.85592	4	104.18	4.57542	4	102.45	5.01999	4
65	-1.41645		95.142	94.5062	96.0797	98.8674	99.385	91.7706	111.499	107.969	111.559	109.786	112.892	109.667			-1.41645	103.824	4.02492	4	103.688	4.14181	4	102.269	4.91212	4
66	-1.34792		94.0694	95.291	94.2802	98.332	99.549	92.8974	107.666	110.272	111.894	108.648	110.92	110.585			-1.34792	102.179	3.56516	4	104.008	3.90385	4	102.414	5.11017	4
67	-1.2794		94.7003	91.0399	95.3085	95.5931	97.13	90.9658	110.818	108.798	111.175	109.604	113.094	111.793			-1.2794	102.679	4.35951	4	102.515	5.09955	4	102.311	5.37146	4
68	-1.21087		93.9432	93.5252	95.9512	98.1672	97.13	90.7243	109.157	108.337	112.326	110.15	113.65	109.232			-1.21087	102.854	4.02416	4	103.161	4.70849	4	102.058	5.18522	4
69	-1.14235		93.2492	93.8522	93.3162	97.5906	98.565	91.5694	109.157	109.304	111.99	107.92	112.841	108.507			-1.14235	101.979	3.89744	4	103.641	4.45634	4	101.346	5.20124	4
70	0		100	100	100	100	100	100	100	100	100	100	100	100			0	100	0	4	100	0	4	100	0	4
71	0.06835		96.5931	98.9536	94.4087	102.389	100.718	99.7787	102.385	100.23	101.343	99.8635	96.0061	99.6133			0.06835	100.308	1.37362	4	98.9769	1.05779	4	98.7859	1.51019	4
72	0.136617		96.0252	94.8986	94.9229	102.677	99.467	100.523	102.896	100.23	101.487	100.182	95.3488	95.5534			0.136617	100.445	1.5967	4	97.4862	1.37591	4	98.1215	1.68125	4
73	0.205283		96.3407	95.8143	94.4087	102.018	98.8315	97.8068	100.639	98.8024	101.151	98.4069	97.5733	94.7318			0.205283	99.3511	1.24917	4	97.7554	0.710361	4	97.0246	1.57427	4
74	0.2735		95.0789	93.9176	92.6093	102.409	98.36	95.6338	101.15	98.48	98.801	99.0442	96.2083	95.7467			0.2735	99.4206	1.60509	4	96.7415	1.07628	4	95.6977	1.2641	4
75	0.342033		93.9432	95.8143	92.9949	101.936	97.8065	97.2837	102.002	98.6642	98.6091	99.4083	96.6127	94.7318			0.342033	99.3222	1.89189	4	97.2244	0.630773	4	95.9049	1.26024	4
76	0.41055		92.8707	94.5716	95.5013	101.4	97.2735	95.8954	102.641	98.6181	99.0408	99.5904	94.7927	95.7467			0.41055	99.1255	2.17694	4	96.314	0.982339	4	96.546	0.835535	4
77	0.479233		93.5016	93.3944	94.473	101.133	97.704	95.5734	102.257	96.8678	99.4724	98.1338	95.7027	95.2634			0.479233	98.7563	1.95582	4	95.9172	0.935719	4	96.1956	1.11658	4
78	0.547683		93.7539	94.7024	93.2519	101.792	98.442	96.3783	101.193	96.8217	98.2734	97.8152	94.7422	94.1518			0.547683	98.6383	1.84846	4	96.1771	0.902726	4	95.5138	1.13041	4
79	0.616217		96.4669	92.675	94.9871	101.009	97.4375	94.2656	102.811	97.4666	100.144	99.0897	96.2083	94.5868			0.616217	99.8441	1.35812	4	95.9468	1.12935	4	95.9959	1.39054	4
80	0.684733		93.2492	91.4323	94.1517	102.451	98.483	93.9437	103.492	97.0981	98.2734	99.909	96.2588	95.6017			0.684733	99.7753	2.30183	4	95.8181	1.53214	4	95.4926	0.997579	4
81	0.75325		91.8612	92.5441	93.0591	101.647	98.3395	94.829	101.576	96.4532	97.6019	100.865	94.0344	94.9734			0.75325	98.9873	2.38192	4	95.3428	1.28315	4	95.1159	0.936003	4
82	0.821483		93.8801	92.5441	91.0668	101.874	99.959	92.173	100.596	96.8217	97.6978	100.273	96.9666	94.9251			0.821483	99.1559	1.79222	4	96.5729	1.52516	4	93.9657	1.4851	4
83	0.89		91.7981	91.1053	91.1311	100.535	95.777	93.4004	101.618	97.6969	97.9376	99.1352	96.3094	92.7501			0.89	98.2718	2.21694	4	95.2221	1.4307	4	93.8048	1.45788	4
84	0.958517		93.1861	89.7973	92.3522	100.453	95.2235	92.5755	101.831	98.8024	98.2734	98.4524	95.905	93.0884			0.958517	98.4807	1.89627	4	94.932	1.87921	4	94.0724	1.40879	4
85	1.02705		92.6814	90.6475	89.91	101.689	95.613	90.2817	100.894	97.9733	98.2734	99.8635	95.0455	92.6535			1.02705	98.782	2.06756	4	94.8198	1.52842	4	92.7796	1.92941	4
86	1.09555		92.1136	90.0589	88.946	100.865	95.5925	90.6237	101.278	97.789	96.9784	98.589	94.9949	92.8951			1.09555	98.2113	2.11679	4	94.6088	1.63127	4	92.3608	1.73892	4
87	1.16407		91.5457	89.5356	90.5527	102.018	97.4785	91.5091	102.044	97.9733	98.0336	98.2704	94.7927	92.7501			1.16407	98.4696	2.47234	4	94.945	1.93376	4	93.2114	1.66915	4
88	1.23258		92.2397	90.1243	90.4242	101.03	96.9455	90.2414	100.256	98.1115	95.9233	98.6345	94.3883	92.3151			1.23258	98.0399	1.99673	4	94.8924	1.76934	4	92.226	1.31855	4
89	1.3011		94.1956	88.62	88.8175	100.577	96.3305	90.1408	100.894	97.8351	98.5612	97.9973	93.731	92.2668			1.3011	98.416	1.54914	4	94.1292	2.02256	4	92.4466	2.15845	4
90	1.36962		92.1136	89.4702	88.6889	100.494	96.31	88.4306	102.385	97.4666	96.3549	98.7255	93.3266	92.7018			1.36962	98.4296	2.23397	4	94.1433	1.7852	4	91.5441	1.87817	4
91	1.43815		92.9338	89.0778	88.8817	100.494	96.0845	88.4105	102.726	97.5587	97.506	96.9504	92.821	90.9618			1.43815	98.276	2.14121	4	93.8855	1.88359	4	91.44	2.09658	4
92	1.50667		88.959	87.2466	89.0746	101.174	96.4125	88.2093	101.235	96.1308	95.5396	98.8166	92.0121	90.3335			1.50667	97.5461	2.91721	4	92.9505	2.15087	4	90.7892	1.6424	4
93	1.57547		90.2208	87.1812	88.6247	101.277	95.7155	88.9135	102.087	95.0714	96.4988	97.7242	92.3155	91.0585			1.57547	97.8272	2.70666	4	92.5709	1.94198	4	91.2739	1.82428	4
94	1.64372		91.1672	86.6579	88.5604	99.7529	96.2075	89.7183	101.661	98.2036	98.0336	97.6331	92.5177	91.2518			1.64372	97.5536	2.28218	4	93.3967	2.53624	4	91.891	2.1204	4
95	1.71223		92.6183	88.4238	87.982	99.9382	96.269	87.3038	103.322	96.7296	96.4029	98.589	92.6694	90.9618			1.71223	98.6169	2.2336	4	93.5229	1.92685	4	90.6626	2.07178	4
96	1.78077		89.7792	90.1897	86.3111	103.336	96.6585	87.9477	101.15	96.3151	94.8201	97.6787	93.4783	90.2368			1.78077	97.986	2.97322	4	94.1604	1.50319	4	89.8289	1.84827	4
97	1.84928		89.1483	86.9196	87.5321	101.133	95.7565	86.1569	100.341	96.6836	95.1559	98.1338	90.8493	91.0585			1.84928	97.1888	2.75426	4	92.5522	2.27233	4	89.9759	2.01165	4
98	1.9178		89.1483	87.8352	87.3393	101.956	94.9774	88.0483	101.065	96.9599	96.1631	98.0428	91.7088	88.2552			1.9178	97.553	2.92405	4	92.8703	1.99722	4	89.9515	2.0798	4
99	1.98632		89.0221	86.6579	88.0463	100.144	94.3829	86.4386	99.9148	96.3611	96.5468	96.9959	91.456	90.1885			1.98632	96.5192	2.59976	4	92.2145	2.10846	4	90.305	2.2178	4
100	2.05485		89.0221	86.7233	87.4679	97.9819	95.49	86.2978	100	96.5454	96.259	97.7697	90.7988	89.6085			2.05485	96.1934	2.4427	4	92.3894	2.26421	4	89.9083	2.2251	4
101	2.1233		89.9685	87.1812	86.5681	100.515	94.4444	85.8954	101.661	96.5454	96.0671	97.7697	92.7199	89.4635			2.1233	97.4785	2.63309	4	92.7227	2.00595	4	89.4985	2.32232	4
102	2.19182		88.959	87.4428	89.0746	100.762	94.5674	85.996	100.767	97.3284	94.5803	96.4497	89.181	89.0285			2.19182	96.7343	2.78414	4	92.1299	2.30274	4	89.6698	1.78829	4
103	2.2605		86.877	86.1347	85.9897	101.091	93.9524	85.493	99.3612	96.0387	93.4293	98.1793	89.4338	88.7869			2.2605	96.3772	3.2227	4	91.3899	2.229	4	88.4247	1.81891	4
104	2.32898		89.9054	87.2466	88.6247	99.9382	94.1779	85.674	100.809	95.532	94.7722	96.8594	90.4449	90.1402			2.32898	96.878	2.47382	4	91.8504	1.874	4	89.8028	1.89831	4
105	2.39748		89.7161	83.5186	87.2751	100.597	93.5424	85.0905	100.298	96.7296	93.9568	98.3614	87.7654	88.4969			2.39748	97.2432	2.5575	4	90.389	2.94721	4	88.7048	1.88711	4
106	2.46598		88.1388	88.4238	84.4473	100.165	94.4034	85.4125	101.491	95.2556	93.5252	96.3132	88.271	88.4002			2.46598	96.5268	3.00386	4	91.5885	1.87956	4	87.9463	2.0411	4
107	2.5345		89.0852	86.5271	85.347	98.0848	94.8134	85.7344	101.022	93.2289	93.8609	96.2221	90.8999	88.5935			2.5345	96.1036	2.53951	4	91.3674	1.80248	4	88.384	1.96392	4
108	2.6028		88.7066	86.5925	86.054	99.2175	92.7429	85.3119	103.279	96.7757	93.5252	98.5435	88.9788	90.3335			2.6028	97.4367	3.0923	4	91.2725	2.2288	4	88.8061	1.92324	4
109	2.67132		87.0032	86.9196	84.3188	101.05	94.3214	85.7545	101.235	95.6241	92.5659	96.6318	90.2427	90.0918			2.67132	96.4801	3.33331	4	91.777	1.98376	4	88.1828	1.90796	4
110	2.73983		89.5268	87.312	86.7609	100.432	94.5879	84.507	100.511	93.9199	93.765	97.0869	89.181	86.8536			2.73983	96.8893	2.58065	4	91.2502	1.78089	4	87.9716	2.00587	4
111	2.80835		87.6341	86.3309	85.4113	99.3616	93.3989	85.1107	100.511	94.2423	91.9904	94.8111	87.2093	87.2885			2.80835	95.5795	2.92041	4	90.2954	2.05042	4	87.4502	1.58824	4
112	2.87688		89.2114	84.6305	86.3111	101.194	93.9114	84.4064	102.896	94.795	93.9568	96.1766	89.3832	87.8685			2.87688	97.3696	3.07071	4	90.68	2.33905	4	88.1357	2.06546	4
113	2.94567		88.3912	83.9765	85.6041	98.4761	93.8089	84.9698	99.8296	94.7029	92.4221	98.0883	88.9282	87.9169			2.94567	96.1963	2.62835	4	90.3541	2.47581	4	87.7282	1.68791	4
114	3.01392		87.0032	86.1347	86.054	99.6705	93.3169	83.9034	102.598	95.5781	94.2926	94.3104	89.3832	88.0619			3.01392	95.8955	3.42492	4	91.1032	2.09303	4	88.078	2.23877	4
115	3.08245		89.8423	86.1347	85.4756	99.2381	93.3169	83.6419	101.32	94.1962	94.1966	96.6773	87.6138	88.4485			3.08245	96.7695	2.49664	4	90.3154	2.01757	4	87.9407	2.30853	4
116	3.15097		88.8959	85.4153	85.9254	99.547	94.3214	85.2918	99.4889	93.0447	93.3333	95.4028	88.9282	88.1585			3.15097	95.8337	2.50778	4	90.4274	2.0286	4	88.1773	1.82534	4
117	3.2195		88.8959	84.4997	86.5681	99.5264	94.4444	83.4406	104.046	93.5053	92.8058	95.0842	87.361	89.3668			3.2195	96.8881	3.23168	4	89.9526	2.40224	4	88.0453	1.99569	4
118	3.28802		87.0662	85.6115	86.054	100.082	92.9479	84.5674	100.894	95.8544	91.7986	94.8111	87.8665	87.5302			3.28802	95.7135	3.18222	4	90.5701	2.33587	4	87.4875	1.55909	4
119	3.35653		87.6972	85.9385	84.5116	99.341	92.8044	84.4869	99.5741	96.0387	92.9976	94.9021	87.8665	87.3852			3.35653	95.3786	2.77691	4	90.662	2.30262	4	87.3453	2.00313	4
120	3.42528		88.0757	85.6115	84.9614	97.9613	93.4194	84.3863	100.98	93.8277	93.6211	95.7214	87.5126	88.2069			3.42528	95.6845	2.75555	4	90.0928	2.07676	4	87.7939	2.11663	4
121	3.49355		88.3912	83.9765	86.3111	100.247	94.4854	83.4205	101.491	94.1041	91.3669	95.3573	88.1699	87.2885			3.49355	96.3715	2.97125	4	90.184	2.52421	4	87.0968	1.64324	4
122	3.56238		86.8139	85.6115	85.7969	100.288	93.7679	82.8169	101.363	92.8144	91.3669	95.2208	88.2204	87.4819			3.56238	95.9215	3.3181	4	90.1036	1.92572	4	86.8657	1.78362	4
123	3.63082		86.4353	85.0883	86.3111	99.0939	92.4969	83.0986	101.789	94.8871	90.5036	94.6746	87.361	90.0918			3.63082	95.4981	3.35801	4	89.9583	2.25834	4	87.5013	1.74464	4
124	3.69905		86.3091	84.5651	86.5681	99.2175	93.9524	84.0241	101.022	93.8277	93.5252	94.8566	88.4732	87.6269			3.69905	95.3513	3.28012	4	90.2046	2.27258	4	87.9361	2.01056	4
125	3.7677		85.7413	84.3689	85.9254	100.412	92.8044	82.1932	99.8722	94.012	90.8873	94.5835	86.1982	86.7086			3.7677	95.1522	3.40136	4	89.3459	2.38769	4	86.4286	1.78303	4
126	3.83615		85.6151	83.6494	84.4473	98.5379	93.4194	83.2797	102.853	93.2289	91.8465	93.5822	87.5126	86.7569			3.83615	95.1472	3.69902	4	89.4526	2.37059	4	86.5826	1.89754	4
127	3.9047		86.8139	83.4532	84.0617	99.8764	92.9889	82.0926	100.383	93.275	92.8537	94.2194	87.7149	87.5302			3.9047	95.3233	3.1618	4	89.358	2.34685	4	86.6345	2.35813	4
128	3.97322		88.8328	83.1262	84.9614	97.7759	93.1529	81.7505	99.9148	93.5053	91.5588	95.4939	88.1193	87.7719			3.97322	95.5044	2.40003	4	89.4759	2.44805	4	86.5106	2.08433	4
129	4.042		90.4101	85.0229	85.4113	97.9819	91.8614	82.495	100.043	94.1962	91.3669	95.9945	85.3387	86.7569			4.042	96.1073	2.07106	4	89.1048	2.31601	4	86.5075	1.84793	4
130	4.11025		85.8675	83.9111	83.2905	98.332	93.2964	81.3883	100.298	93.4592	92.2782	93.4001	87.5126	87.4819			4.11025	94.4744	3.21493	4	89.5448	2.33214	4	86.1097	2.4182	4
131	4.17877		84.6057	84.6959	85.0257	98.5791	93.3579	83.2394	100.809	93.9659	90.8873	94.8111	86.0971	86.2736			4.17877	94.7013	3.58559	4	89.5292	2.40631	4	86.3565	1.63355	4
132	4.2473		84.795	83.584	84.5116	98.5173	91.6359	81.4085	99.9148	93.6435	92.1343	92.5353	87.2093	86.9502			4.2473	93.9406	3.44305	4	89.0182	2.25551	4	86.2511	2.26528	4
133	4.31582		86.0568	83.7148	84.3188	98.7438	93.1529	81.3883	102.215	94.8411	91.7026	92.1711	87.0576	85.9836			4.31582	94.7966	3.58104	4	89.6916	2.6006	4	85.8483	2.1703	4
134	4.38435		85.2997	82.7338	82.8406	98.6409	91.4104	82.5553	101.193	92.4919	91.3189	93.7642	85.8948	87.6269			4.38435	94.7243	3.49907	4	88.1328	2.30764	4	86.0854	2.09674	4
135	4.45287		85.6151	83.1916	83.5476	99.2381	93.5834	82.837	100.98	92.6301	90.6954	93.7187	87.2599	87.3369			4.45287	94.8879	3.45668	4	89.1663	2.42968	4	86.1042	1.8214	4
136	4.5214		85.9306	83.8457	82.9049	98.6203	92.5379	82.7565	99.063	92.8604	91.3669	94.1284	86.3498	85.1136			4.5214	94.4356	3.04623	4	88.8985	2.25406	4	85.5355	2.01714	4
137	4.58992		86.5615	83.6494	84.7686	98.1466	93.0504	81.3883	100.128	92.3998	90.3118	96.4497	86.9565	86.0802			4.58992	95.3214	3.01513	4	89.0141	2.25034	4	85.6372	1.84515	4
138	4.65845		84.1009	82.5376	82.1979	97.8995	93.0709	81.1066	100.554	93.7817	91.4628	93.2635	87.9171	85.5486			4.65845	93.9544	3.61343	4	89.3268	2.61318	4	85.079	2.32834	4
139	4.72697		85.1104	84.6959	83.162	99.1145	92.6199	80.9054	100.468	94.1502	91.7026	94.0373	87.9676	86.7569			4.72697	94.6827	3.47805	4	89.8584	2.16548	4	85.6317	2.35513	4
140	4.79547		85.1104	83.7148	83.162	97.117	92.8864	81.4688	100.383	94.6108	90.7914	93.3091	86.906	86.2736			4.79547	93.9799	3.29093	4	89.5295	2.54594	4	85.4239	2.04717	4
141	4.864		84.6688	83.5186	83.6761	97.8789	92.7019	81.8511	98.9779	92.0313	90.024	94.6746	87.0071	86.5636			4.864	94.05	3.25758	4	88.8147	2.1751	4	85.5287	1.78501	4
142	4.93253		85.6151	81.6874	82.1337	95.4489	93.8294	81.1871	101.576	93.2289	91.8465	92.3532	85.5915	87.8685			4.93253	93.7483	3.31985	4	88.5843	2.9666	4	85.759	2.5092	4
143	5.00103		85.1104	82.7338	84.7686	98.2908	91.7384	80.664	98.7649	92.2156	89.6882	92.9449	85.8443	86.6119			5.00103	93.7778	3.17615	4	88.133	2.31041	4	85.4332	1.88595	4
144	5.06957		82.9653	83.7148	82.7121	96.9934	92.1484	80.7445	100.894	92.9986	90.4077	93.127	86.2993	83.9536			5.06957	93.495	3.85141	4	88.7903	2.25374	4	84.4545	2.09148	4
145	5.13808		86.0568	82.7338	83.3548	97.3023	92.1894	80.7646	96.7632	92.2156	90.7434	94.8111	85.6926	83.8569			5.13808	93.7334	2.6142	4	88.2079	2.38408	4	84.6799	2.13169	4
146	5.2066		83.5331	83.3878	82.0694	97.8995	91.9024	79.5976	100.809	92.8604	91.3189	93.4001	85.996	84.2919			5.2066	93.9105	3.77993	4	88.5367	2.29108	4	84.3195	2.52244	4
147	5.27512		84.4795	82.7992	82.5835	97.8377	93.6449	80.1207	99.6167	91.7089	91.223	94.9477	86.9565	84.8719			5.27512	94.2204	3.38648	4	88.7774	2.43825	4	84.6998	2.38098	4
148	5.34363		82.5237	82.93	81.8766	96.9522	92.4354	79.5976	101.193	92.9986	88.8729	92.7629	87.4621	85.6936			5.34363	93.3578	4.00036	4	88.9565	2.36279	4	84.0102	2.05148	4
149	5.41217		83.6593	82.93	80.0129	98.1878	93.3784	80.6841	101.235	93.275	89.8321	93.5366	86.8554	83.4219			5.41217	94.1547	3.83985	4	89.1097	2.56323	4	83.4878	2.23962	4
150	6.63178		52.8707	9.02551	5.52699	87.9119	15.1702	10.4427	76.0221	26.7158	17.2182	68.2749	27.6036	18.028			6.63178	71.2699	7.34303	4	19.6288	4.52892	4	12.804	2.96236	4
151	6.70005		54.7003	8.9601	5.20566	89.8476	14.6986	9.75855	79.5997	27.0843	17.7458	69.5949	27.5531	17.9314			6.70005	73.4356	7.4895	4	19.574	4.62326	4	12.6603	3.13101	4
152	6.76857		54.6372	9.41792	5.26992	90.2595	15.0472	9.65795	79.3441	26.9	18.0815	70.2777	28.0586	18.898			6.76857	73.6296	7.53411	4	19.8559	4.55504	4	12.9769	3.31071	4
153	6.8371		53.123	9.02551	4.82005	89.4357	15.1087	9.49698	77.0443	27.637	17.7938	69.2308	28.4125	19.5747			6.8371	72.2085	7.6009	4	20.0459	4.77364	4	12.9214	3.48047	4
154	6.90562		53.2492	9.35252	4.88432	88.612	15.3137	9.65795	78.1516	27.2225	18.1295	69.1853	29.272	19.188			6.90562	72.2995	7.48865	4	20.2902	4.77081	4	12.9649	3.4355	4
155	6.97413		55.2681	9.41792	5.01285	89.5799	15.1702	9.39638	79.0034	26.7619	17.0743	69.2308	28.1598	18.2214			6.97413	73.2706	7.29879	4	19.8774	4.54195	4	12.4262	3.15339	4
156	7.04265		53.9432	9.41792	4.75578	89.3534	15.6622	9.33602	77.6831	26.9461	16.7866	71.097	28.3114	18.6564			7.04265	73.0192	7.39451	4	20.0844	4.54695	4	12.3837	3.24301	4
157	7.11117		53.6909	10.0719	4.94859	89.5593	15.1907	9.09457	76.8313	26.6697	16.8345	68.0473	28.4125	17.3997			7.11117	72.0322	7.54164	4	20.0862	4.44337	4	12.0693	3.03692	4
158	7.17968		54.6372	9.41792	4.88432	89.4152	15.3547	9.09457	78.0239	27.4067	17.1703	69.9135	28.362	17.013			7.17968	72.9974	7.31103	4	20.1353	4.63922	4	12.0405	3.04042	4
159	7.2482		54.4479	9.94114	4.82005	89.93	15.3547	9.17505	79.3867	27.3146	16.8345	69.5949	28.9181	16.4331			7.2482	73.3399	7.5428	4	20.3821	4.61169	4	11.8157	2.92148	4
160	7.31673		54.0063	10.0719	4.49871	89.6417	15.3342	8.87324	78.1942	27.0843	16.5468	67.1825	28.9181	16.8681			7.31673	72.2562	7.6175	4	20.3521	4.56034	4	11.6967	3.02832	4
			Mn Concentrations
			0	50	400	0	50	400	0	50	400	0	50	400
			1831	1853	1747	6034	5819	5827	2770	2689	2742	3027	2908	2887
			1868	1799	1759	5990	5663	5757	2754	2721	2735	3116	2996	2862
			1811	1783	1763	5942	5694	5733	2731	2678	2609	3014	2877	2862
			1793	1776	1732	5982	5564	5757	2752	2624	2620	2971	2956	2854
			1806	1770	1711	5916	5645	5703	2750	2625	2640	3045	2895	2856
			1802	1790	1755	5939	5734	5780	2768	2584	2635	2967	2889	2853
			1796	1766	1772	5889	5732	5765	2739	2574	2618	3004	2891	2843
			1800	1765	1794	5809	5725	5644	2713	2590	2604	2964	2909	2796
			1821	1775	1769	5880	5551	5606	2712	2604	2596	2957	2872	2816
			1844	1780	1761	5818	5345	5615	2718	2600	2573	2934	2864	2783
			1794	1764	1748	5718	5333	5533	2710	2536	2568	3009	2912	2818
			1789	1749	1729	5734	5291	5522	2701	2537	2503	2995	2859	2809
			1755	1691	1754	5795	5276	5531	2710	2564	2512	2987	2783	2749
			1758	1784	1768	5698	5395	5486	2661	2533	2582	2937	2811	2739
			1788	1742	1755	5715	5275	5406	2739	2513	2502	2976	2861	2801
			1788	1727	1775	5628	5299	5400	2745	2647	2499	2946	2802	2715
			1783	1756	1787	5607	5248	5288	2667	2561	2499	2912	2774	2745
			1736	1724	1781	5660	5264	5291	2600	2524	2501	2922	2787	2739
			1757	1717	1774	5545	5166	5264	2628	2537	2536	2907	2776	2785
			1756	1740	1771	5552	5183	5298	2609	2535	2498	2953	2749	2727
			1748	1718	1761	5555	5251	5185	2641	2510	2485	2916	2786	2707
			1828	1703	1739	5544	5252	5174	2608	2520	2499	2925	2747	2749
			1723	1705	1726	5547	5138	5232	2636	2516	2515	2894	2741	2731
			1746	1711	1761	5411	5195	5236	2613	2485	2497	2918	2771	2731
			1709	1698	1757	5446	5126	5065	2601	2522	2454	2887	2734	2723
			1755	1684	1768	5423	5228	5094	2608	2528	2506	2892	2675	2715
			1732	1676	1788	5390	5082	5044	2648	2530	2496	2860	2688	2683
			1662	1690	1754	5341	5077	5024	2644	2456	2462	2859	2698	2688
			1706	1643	1724	5340	5134	4980	2592	2461	2480	2866	2711	2710
			1664	1696	1762	5407	5119	5004	2592	2484	2452	2883	2668	2666
			1680	1642	1736	5341	5147	5024	2578	2485	2485	2867	2678	2687
			1681	1660	1768	5297	5125	5003	2659	2514	2422	2814	2654	2620
			1708	1601	1760	5319	5178	4990	2635	2501	2423	2809	2715	2655
			1694	1628	1753	5315	5064	4904	2631	2499	2434	2778	2663	2617
			1715	1577	1751	5254	5059	4894	2666	2479	2458	2781	2632	2647
			1684	1586	1690	5187	5051	4942	2604	2463	2392	2746	2636	2684
			1666	1570	1704	5263	5116	4833	2582	2436	2423	2754	2637	2633
			1630	1576	1721	5224	5008	4939	2621	2477	2459	2785	2648	2640
			1656	1603	1734	5200	5050	4922	2621	2490	2402	2714	2664	2564
			1647	1576	1721	5238	5126	4896	2632	2482	2439	2782	2625	2583
			1628	1562	1670	5204	5108	4848	2625	2411	2431	2773	2592	2597
			1622	1550	1746	5156	5016	4755	2551	2420	2456	2724	2569	2577
			1645	1540	1734	5231	4975	4822	2531	2467	2425	2724	2596	2637
			1640	1538	1720	5138	5051	4792	2567	2442	2404	2740	2521	2571
			1680	1523	1706	5172	5006	4855	2613	2485	2428	2747	2552	2551
			1609	1515	1755	5100	5020	4817	2604	2428	2376	2710	2574	2563
			1609	1550	1676	5140	5069	4859	2640	2456	2414	2700	2560	2597
			1603	1508	1728	5108	5082	4882	2557	2401	2433	2662	2491	2535
			1626	1521	1732	5097	5010	4841	2639	2452	2411	2694	2528	2510
			1562	1529	1636	4791	4881	4677	2543	2445	2376	2381	2367	2424
			1560	1491	1651	4800	4853	4611	2594	2403	2413	2498	2332	2375
			1554	1497	1616	4776	4893	4602	2606	2408	2380	2525	2355	2383
			1536	1460	1601	4875	4819	4610	2602	2413	2321	2465	2325	2354
			1570	1484	1615	4756	4796	4526	2548	2357	2364	2466	2319	2399
			1558	1481	1574	4691	4853	4596	2588	2371	2337	2396	2316	2387
			1568	1465	1618	4776	4815	4600	2578	2407	2361	2434	2300	2363
			1532	1488	1619	4725	4795	4570	2630	2408	2327	2435	2281	2264
			1531	1447	1578	4728	4839	4600	2571	2387	2348	2454	2281	2302
			1533	1465	1555	4743	4787	4610	2612	2367	2347	2426	2280	2328
			1526	1442	1586	4786	4824	4582	2602	2369	2379	2442	2269	2336
			1524	1456	1610	4770	4902	4566	2621	2423	2373	2422	2279	2306
			1520	1432	1580	4786	4821	4605	2541	2395	2372	2394	2264	2307
			1504	1433	1596	4753	4777	4577	2718	2412	2362	2425	2272	2263
			1515	1442	1527	4810	4821	4490	2618	2380	2330	2399	2254	2267
			1508	1445	1495	4801	4848	4561	2618	2344	2326	2412	2233	2269
			1491	1457	1467	4775	4856	4617	2528	2394	2333	2387	2194	2288
			1501	1392	1483	4642	4738	4521	2602	2362	2318	2408	2237	2313
			1489	1430	1493	4767	4738	4509	2563	2352	2342	2420	2248	2260
			1478	1435	1452	4739	4808	4551	2563	2373	2335	2371	2232	2245
			1585	1529	1556	4856	4878	4970	2348	2171	2085	2197	1978	2069
			1531	1513	1469	4972	4913	4959	2404	2176	2113	2194	1899	2061
			1522	1451	1477	4986	4852	4996	2416	2176	2116	2201	1886	1977
			1527	1465	1469	4954	4821	4861	2363	2145	2109	2162	1930	1960
			1507	1436	1441	4973	4798	4753	2375	2138	2060	2176	1903	1981
			1489	1465	1447	4950	4771	4835	2395	2142	2056	2184	1911	1960
			1472	1446	1486	4924	4745	4766	2410	2141	2065	2188	1875	1981
			1482	1428	1470	4911	4766	4750	2401	2103	2074	2156	1893	1971
			1486	1448	1451	4943	4802	4790	2376	2102	2049	2149	1874	1948
			1529	1417	1478	4905	4753	4685	2414	2116	2088	2177	1903	1957
			1478	1398	1465	4975	4804	4669	2430	2108	2049	2195	1904	1978
			1456	1415	1448	4936	4797	4713	2385	2094	2035	2216	1860	1965
			1488	1415	1417	4947	4876	4581	2362	2102	2037	2203	1918	1964
			1455	1393	1418	4882	4672	4642	2386	2121	2042	2178	1905	1919
			1477	1373	1437	4878	4645	4601	2391	2145	2049	2163	1897	1926
			1469	1386	1399	4938	4664	4487	2369	2127	2049	2194	1880	1917
			1460	1377	1384	4898	4663	4504	2378	2123	2022	2166	1879	1922
			1451	1369	1409	4954	4755	4548	2396	2127	2044	2159	1875	1919
			1462	1378	1407	4906	4729	4485	2354	2130	2000	2167	1867	1910
			1493	1355	1382	4884	4699	4480	2369	2124	2055	2153	1854	1909
			1460	1368	1380	4880	4698	4395	2404	2116	2009	2169	1846	1918
			1473	1362	1383	4880	4687	4394	2412	2118	2033	2130	1836	1882
			1410	1334	1386	4913	4703	4384	2377	2087	1992	2171	1820	1869
			1430	1333	1379	4918	4669	4419	2397	2064	2012	2147	1826	1884
			1445	1325	1378	4844	4693	4459	2387	2132	2044	2145	1830	1888
			1468	1352	1369	4853	4696	4339	2426	2100	2010	2166	1833	1882
			1423	1379	1343	5018	4715	4371	2375	2091	1977	2146	1849	1867
			1413	1329	1362	4911	4671	4282	2356	2099	1984	2156	1797	1884
			1413	1343	1359	4951	4633	4376	2373	2105	2005	2154	1814	1826
			1411	1325	1370	4863	4604	4296	2346	2092	2013	2131	1809	1866
			1411	1326	1361	4758	4658	4289	2348	2096	2007	2148	1796	1854
			1426	1333	1347	4881	4607	4269	2387	2096	2003	2148	1834	1851
			1410	1337	1386	4893	4613	4274	2366	2113	1972	2119	1764	1842
			1377	1317	1338	4909	4583	4249	2333	2085	1948	2157	1769	1837
			1425	1334	1379	4853	4594	4258	2367	2074	1976	2128	1789	1865
			1422	1277	1358	4885	4563	4229	2355	2100	1959	2161	1736	1831
			1397	1352	1314	4864	4605	4245	2383	2068	1950	2116	1746	1829
			1412	1323	1328	4763	4625	4261	2372	2024	1957	2114	1798	1833
			1406	1324	1339	4818	4524	4240	2425	2101	1950	2165	1760	1869
			1379	1329	1312	4907	4601	4262	2377	2076	1930	2123	1785	1864
			1419	1335	1350	4877	4614	4200	2360	2039	1955	2133	1764	1797
			1389	1320	1329	4825	4556	4230	2360	2046	1918	2083	1725	1806
			1414	1294	1343	4914	4581	4195	2416	2058	1959	2113	1768	1818
			1401	1284	1332	4782	4576	4223	2344	2056	1927	2155	1759	1819
			1379	1317	1339	4840	4552	4170	2409	2075	1966	2072	1768	1822
			1424	1317	1330	4819	4552	4157	2379	2045	1964	2124	1733	1830
			1409	1306	1337	4834	4601	4239	2336	2020	1946	2096	1759	1824
			1409	1292	1347	4833	4607	4147	2443	2030	1935	2089	1728	1849
			1380	1309	1339	4860	4534	4203	2369	2081	1914	2083	1738	1811
			1390	1314	1315	4824	4527	4199	2338	2085	1939	2085	1738	1808
			1396	1309	1322	4757	4557	4194	2371	2037	1952	2103	1731	1825
			1401	1284	1343	4868	4609	4146	2383	2043	1905	2095	1744	1806
			1376	1309	1335	4870	4574	4116	2380	2015	1905	2092	1745	1810
			1370	1301	1343	4812	4512	4130	2390	2060	1887	2080	1728	1864
			1368	1293	1347	4818	4583	4176	2372	2037	1950	2084	1750	1813
			1359	1290	1337	4876	4527	4085	2345	2041	1895	2078	1705	1794
			1357	1279	1314	4785	4557	4139	2415	2024	1915	2056	1731	1795
			1376	1276	1308	4850	4536	4080	2357	2025	1936	2070	1735	1811
			1408	1271	1322	4748	4544	4063	2346	2030	1909	2098	1743	1816
			1433	1300	1329	4758	4481	4100	2349	2045	1905	2109	1688	1795
			1361	1283	1296	4775	4551	4045	2355	2029	1924	2052	1731	1810
			1341	1295	1323	4787	4554	4137	2367	2040	1895	2083	1703	1785
			1344	1278	1315	4784	4470	4046	2346	2033	1921	2033	1725	1799
			1364	1280	1312	4795	4544	4045	2400	2059	1912	2025	1722	1779
			1352	1265	1289	4790	4459	4103	2376	2008	1904	2060	1699	1813
			1357	1272	1300	4819	4565	4117	2371	2011	1891	2059	1726	1807
			1362	1282	1290	4789	4514	4113	2326	2016	1905	2068	1708	1761
			1372	1279	1319	4766	4539	4045	2351	2006	1883	2119	1720	1781
			1333	1262	1279	4754	4540	4031	2361	2036	1907	2049	1739	1770
			1349	1295	1294	4813	4518	4021	2359	2044	1912	2066	1740	1795
			1349	1280	1294	4716	4531	4049	2357	2054	1893	2050	1719	1785
			1342	1277	1302	4753	4522	4068	2324	1998	1877	2080	1721	1791
			1357	1249	1278	4635	4577	4035	2385	2024	1915	2029	1693	1818
			1349	1265	1319	4773	4475	4009	2319	2002	1870	2042	1698	1792
			1315	1280	1287	4710	4495	4013	2369	2019	1885	2046	1707	1737
			1364	1265	1297	4725	4497	4014	2272	2002	1892	2083	1695	1735
			1324	1275	1277	4754	4483	3956	2367	2016	1904	2052	1701	1744
			1339	1266	1285	4751	4568	3982	2339	1991	1902	2086	1720	1756
			1308	1268	1274	4708	4509	3956	2376	2019	1853	2038	1730	1773
			1326	1268	1245	4768	4555	4010	2377	2025	1873	2055	1718	1726
			838	138	86	4269	740	519	1785	580	359	1500	546	373
			867	137	81	4363	717	485	1869	588	370	1529	545	371
			866	144	82	4383	734	480	1863	584	377	1544	555	391
			842	138	75	4343	737	472	1809	600	371	1521	562	405
			844	143	76	4303	747	480	1835	591	378	1520	579	397
			876	144	78	4350	740	467	1855	581	356	1521	557	377
			855	144	74	4339	764	464	1824	585	350	1562	560	386
			851	154	77	4349	741	452	1804	579	351	1495	562	360
			866	144	76	4342	749	452	1832	595	358	1536	561	352
			863	152	75	4367	749	456	1864	593	351	1529	572	340
			856	154	70	4353	748	441	1836	588	345	1476	572	349

## Sheet: Figure5E
SiNRAT1-T241V
LPR50
Mn
																Condition
			Mn Concentrations													Mean	SEM	N
Cycle Nr.	Time (min)		0	50	400	0	50	400	0	50	400				Time (min)	0 µM Mn2+			50 μM Mn2+			400 μM Mn2+
1	-6.95145		120.425	120.17	124.596	126.243	136.685	126.608	138.582	141.945	138.348				-6.95145	128.417	5.35286	3	132.933	6.55996	3	129.85	4.28818	3
2	-6.8828		122.402	119.13	124.617	125.737	134.715	125.955	137.778	140.948	138.586				-6.8828	128.639	4.66975	3	131.597	6.48805	3	129.72	4.45014	3
3	-6.81432		120.509	118.6	124.962	125.092	138.909	121.249	136.643	139.401	139.16				-6.81432	127.415	4.80008	3	132.303	6.85308	3	128.457	5.45763	3
4	-6.74607		120.383	121.527	123.755	122.56	137.039	123.439	135.366	141.097	137.679				-6.74607	126.103	4.67413	3	133.221	5.96325	3	128.291	4.6949	3
5	-6.67755		119.962	118.579	121.362	123.343	136.331	122.973	137.683	140.748	136.008				-6.67755	126.996	5.432	3	131.886	6.77465	3	126.781	4.63667	3
6	-6.60903		121.371	118.643	120.263	120.948	135.927	124.045	135.508	140.549	138.825				-6.60903	125.943	4.78434	3	131.706	6.66661	3	127.711	5.66333	3
7	-6.54027		118.448	118.324	120.285	120.856	133.401	122.181	135.556	137.905	137.249				-6.54027	124.953	5.34661	3	129.877	5.92071	3	126.572	5.36687	3
8	-6.47202		117.564	117.264	118.646	119.521	132.794	121.016	134.232	139.451	136.915				-6.47202	123.772	5.26009	3	129.837	6.57343	3	125.526	5.73558	3
9	-6.40323		118.279	116.713	119.918	120.304	131.531	120.69	135.083	136.858	134.145				-6.40323	124.555	5.29605	3	128.367	6.02677	3	124.918	4.61914	3
10	-6.33487		118.342	117.54	118.582	116.989	132.188	119.571	132.482	143.99	132.951				-6.33487	122.605	4.9543	3	131.239	7.65024	3	123.701	4.63377	3
11	-6.26633		118.237	118.134	120.694	117.587	131.228	119.338	137.494	138.554	137.87				-6.26633	124.44	6.52993	3	129.305	5.97264	3	125.968	5.96416	3
12	-6.19777		118.931	116.479	119.315	117.864	130.015	120.13	132.151	138.703	134.432				-6.19777	122.982	4.59493	3	128.399	6.46617	3	124.626	4.90872	3
13	-6.12923		115.313	115.843	119.487	118.6	130.167	118.733	131.3	140	134.336				-6.12923	121.738	4.87435	3	128.67	7.01354	3	124.185	5.08015	3
14	-6.06095		114.304	115.419	118.474	117.818	131.481	120.084	130.544	138.903	133.668				-6.06095	120.888	4.93309	3	128.601	6.93042	3	124.075	4.81872	3
15	-5.99238		116.47	117.519	118.926	116.39	130.52	118.267	130.875	138.404	134.432				-5.99238	121.245	4.81484	3	128.814	6.08915	3	123.875	5.28184	3
16	-5.92413		114.598	114.571	115.801	116.805	129.358	119.245	131.773	137.606	134.527				-5.92413	121.059	5.3949	3	127.178	6.73852	3	123.191	5.75463	3
17	-5.85558		114.893	113.892	114.658	118.692	128.853	118.173	131.915	136.459	134.05				-5.85558	121.833	5.15874	3	126.401	6.6289	3	122.294	5.96491	3
18	-5.7872		112.684	112.853	115.693	117.219	129.813	117.707	130.686	136.908	132.378				-5.7872	120.196	5.40558	3	126.524	7.13613	3	121.926	5.25825	3
19	-5.71838		111.506	112.747	114.594	117.956	129.56	117.195	129.456	135.561	132.808				-5.71838	119.639	5.24971	3	125.956	6.8281	3	121.532	5.6877	3
20	-5.64983		112.789	112.98	115.154	115.93	127.337	120.69	131.111	136.309	133.524				-5.64983	119.943	5.65696	3	125.542	6.79413	3	123.123	5.44079	3
21	-5.58125		111.99	111.622	112.654	115.424	127.084	119.618	129.125	135.212	131.28				-5.58125	118.846	5.23423	3	124.64	6.91854	3	121.184	5.43362	3
22	-5.51273		109.95	111.474	113.882	116.667	127.489	117.241	130.638	134.015	132.617				-5.51273	119.085	6.0935	3	124.326	6.69643	3	121.247	5.76716	3
23	-5.44448		109.045	112.174	112.891	117.035	127.438	114.492	129.976	135.362	131.375				-5.44448	118.685	6.09847	3	124.991	6.8046	3	119.586	5.91277	3
24	-5.37595		110.391	110.986	113.236	115.378	127.185	117.241	130.686	135.611	130.802				-5.37595	118.818	6.10584	3	124.594	7.22567	3	120.426	5.31525	3
25	-5.30743		110.454	109.862	110.714	115.009	128.146	115.89	129.078	133.267	130.611				-5.30743	118.181	5.60514	3	123.758	7.10356	3	119.072	5.96022	3
26	-5.23892		110.412	109.777	109.916	116.068	129.914	116.589	128.511	134.314	130.134				-5.23892	118.33	5.34557	3	124.669	7.55319	3	118.88	5.94768	3
27	-5.17002		109.907	110.201	112.46	115.331	126.529	116.915	127.329	136.409	129.704				-5.17002	117.522	5.147	3	124.38	7.64137	3	119.693	5.16811	3
28	-5.10175		108.982	109.374	109.118	114.549	127.185	116.123	129.551	133.566	129.847				-5.10175	117.694	6.14243	3	123.375	7.23875	3	118.363	6.08781	3
29	-5.03327		109.171	110.201	113.236	113.812	126.377	118.034	126.809	132.918	127.65				-5.03327	116.597	5.27845	3	123.165	6.75135	3	119.64	4.23799	3
30	-4.96475		110.055	108.611	110.541	114.595	126.326	117.474	126.95	133.317	128.988				-4.96475	117.2	5.04831	3	122.751	7.35258	3	119.001	5.37948	3
31	-4.89597		107.531	110.88	109.075	113.26	126.68	115.424	127.66	133.067	125.931				-4.89597	116.15	5.98777	3	123.543	6.59419	3	116.81	4.91502	3
32	-4.82742		106.626	107.635	109.399	115.009	125.366	116.123	128.558	131.521	125.883				-4.82742	116.731	6.38946	3	121.508	7.16014	3	117.135	4.78561	3
33	-4.75873		106.899	107.699	108.041	112.569	124.76	118.406	124.728	132.469	124.308				-4.75873	114.732	5.25909	3	121.643	7.31841	3	116.918	4.75447	3
34	-4.6901		106.71	106.511	109.894	112.339	124.154	115.75	127.187	131.372	126.17				-4.6901	115.412	6.10755	3	120.679	7.38392	3	117.272	4.75954	3
35	-4.62162		105.848	106.278	108.967	114.227	121.425	115.424	127.139	128.579	124.069				-4.62162	115.738	6.1927	3	118.76	6.5741	3	116.153	4.37463	3
36	-4.55308		106.226	105.599	108.687	110.773	126.781	116.636	123.593	128.479	126.313				-4.55308	113.531	5.19959	3	120.286	7.35993	3	117.212	5.09637	3
37	-4.4844		105.322	104.878	107.502	112.431	124.154	115.657	125.248	126.783	125.454				-4.4844	114.334	5.8304	3	118.605	6.90528	3	116.204	5.18954	3
38	-4.41588		104.691	104.92	108.321	112.247	122.739	114.445	123.783	128.18	124.26				-4.41588	113.573	5.55107	3	118.613	7.02408	3	115.675	4.6421	3
39	-4.34737		105.111	105.493	107.847	113.582	125.063	116.03	123.924	127.93	122.923				-4.34737	114.206	5.43974	3	119.496	7.04995	3	115.6	4.35741	3
40	-4.27887		104.523	105.536	106.92	111.602	123.598	115.424	122.648	127.581	123.114				-4.27887	112.924	5.27391	3	118.905	6.78281	3	115.152	4.67681	3
41	-4.21035		105.238	106.957	107.07	111.832	122.638	115.517	119.764	126.983	124.212				-4.21035	112.278	4.19918	3	118.859	6.08193	3	115.6	4.9485	3
42	-4.14183		103.955	105.811	106.941	111.74	124.457	114.818	124.019	127.98	123.305				-4.14183	113.238	5.84027	3	119.416	6.87801	3	115.021	4.72483	3
43	-4.07332		103.597	104.327	109.054	111.372	121.071	116.123	122.695	127.631	122.827				-4.07332	112.555	5.54474	3	117.676	6.93823	3	116.001	3.9765	3
44	-4.0048		104.544	104.178	105.863	111.51	123.092	114.818	121.324	124.589	122.923				-4.0048	112.459	4.86727	3	117.286	6.56831	3	114.535	4.92664	3
45	-3.93628		101.704	103.775	107.415	110.129	122.638	114.911	121.371	123.092	122.541				-3.93628	111.068	5.69687	3	116.502	6.36462	3	114.956	4.36633	3
46	-3.86777		104.27	102.99	108.601	110.175	122.284	112.255	119.716	124.14	122.206				-3.86777	111.387	4.49993	3	116.471	6.7617	3	114.354	4.0653	3
47	-3.79925		102.84	102.8	106.898	109.392	122.789	115.564	119.574	123.99	121.538				-3.79925	110.602	4.86865	3	116.526	6.8721	3	114.666	4.24987	3
48	-3.73075		103.324	104.475	107.739	110.912	121.172	111.603	118.014	122.743	121.968				-3.73075	110.75	4.24161	3	116.13	5.84515	3	113.77	4.24797	3
49	-3.66225		101.409	103.881	104.203	110.037	123.295	113.467	116.879	123.342	120.201				-3.66225	109.442	4.47573	3	116.839	6.47898	3	112.624	4.63717	3
50	-2.4439		94.573	99.0244	100.776	109.3	119.606	111.65	113.097	118.803	115.425				-2.4439	105.657	5.64919	3	112.478	6.73068	3	109.284	4.39117	3
51	-2.37565		94.7833	99.4698	101.25	107.551	117.787	109.646	113.191	117.805	118.481				-2.37565	105.175	5.44509	3	111.687	6.10879	3	109.793	4.97473	3
52	-2.30713		95.6878	99.8727	100.647	108.149	117.736	109.226	112.482	115.212	113.992				-2.30713	105.44	5.03386	3	110.94	5.58155	3	107.955	3.90466	3
53	-2.23863		95.183	98.7487	101.035	108.517	115.26	111.044	112.671	114.613	114.995				-2.23863	105.457	5.27525	3	109.541	5.39929	3	109.025	4.15459	3
54	-2.17012		95.0778	97.8579	101.056	107.919	115.462	109.553	111.111	115.81	114.47				-2.17012	104.703	4.89984	3	109.71	5.92704	3	108.36	3.91785	3
55	-2.1016		95.204	97.1792	99.7413	106.63	114.856	110.438	110.213	114.364	117.049				-2.1016	104.016	4.52554	3	108.8	5.81201	3	109.076	5.04241	3
56	-2.03308		93.8578	98.176	99.9138	108.425	114.401	110.857	108.936	115.262	114.756				-2.03308	103.74	4.9432	3	109.28	5.55738	3	108.509	4.44265	3
57	-1.96457		95.0568	96.7126	97.8013	107.643	115.563	109.413	112.057	115.561	113.706				-1.96457	104.919	5.09294	3	109.279	6.28321	3	106.973	4.75052	3
58	-1.89605		93.6264	98.0064	100.819	108.333	114.502	110.578	110.165	112.17	113.945				-1.89605	104.042	5.23445	3	108.226	5.15404	3	108.447	3.93592	3
59	-1.82755		92.9533	96.8611	100.366	105.663	113.391	110.391	108.7	112.469	114.327				-1.82755	102.439	4.82304	3	107.573	5.36281	3	108.362	4.15578	3
60	-1.75903		93.8999	99.2577	99.0946	107.965	114.957	110.671	109.456	114.065	111.509				-1.75903	103.774	4.95566	3	109.426	5.09092	3	107.092	4.00579	3
61	-1.69052		95.3092	97.9852	99.1593	109.438	113.997	110.811	110.496	113.067	112.321				-1.69052	105.081	4.8956	3	108.35	5.18928	3	107.43	4.15843	3
62	-1.62202		94.573	97.4549	100.625	108.84	112.986	110.252	109.314	112.269	111.079				-1.62202	104.242	4.83664	3	107.57	5.06187	3	107.319	3.3553	3
63	-1.55323		92.3223	97.9215	100.302	107.643	112.178	108.76	107.943	113.367	111.891				-1.55323	102.636	5.15765	3	107.822	4.96212	3	106.984	3.46139	3
64	-1.48497		94.4678	96.5642	96.6372	105.387	112.936	108.155	109.078	111.671	111.939				-1.48497	102.978	4.38625	3	107.057	5.25907	3	105.577	4.60142	3
65	-1.41645		93.1005	97.6034	97.3055	107.735	113.694	110.345	109.362	111.421	111.175				-1.41645	103.399	5.17061	3	107.573	5.02771	3	106.275	4.49118	3
66	-1.34792		92.8061	98.8547	99.7844	107.781	114.047	111.37	106.714	110.873	109.933				-1.34792	102.434	4.82361	3	107.925	4.62682	3	107.029	3.64604	3
67	-1.2794		93.2688	97.2428	99.1593	107.459	113.188	110.578	107.518	111.671	108.548				-1.2794	102.748	4.7398	3	107.367	5.08119	3	106.095	3.51704	3
68	-1.21087		93.9419	96.9883	100.604	108.425	112.986	109.972	106.998	108.479	109.36				-1.21087	103.122	4.60832	3	106.151	4.76263	3	106.645	3.02598	3
69	-1.14235		92.4485	96.3097	97.9953	109.53	112.683	112.022	105.343	109.077	108.787				-1.14235	102.441	5.14022	3	106.023	4.96716	3	106.268	4.24061	3
70	0		100	100	100	100	100	100	100	100	100				0	100	0	3	100	0	3	100	0	3
71	0.06835		100.337	98.3457	99.9353	99.4015	100.707	99.9534	99.0544	98.803	98.5196				0.06835	99.5975	0.382903	3	99.2854	0.723167	3	99.4694	0.474957	3
72	0.136617		100.841	98.7911	97.715	99.7238	98.4841	97.7167	98.156	97.7556	96.9436				0.136617	99.5737	0.778821	3	98.3436	0.30706	3	97.4584	0.2574	3
73	0.205283		100.042	97.2853	98.297	98.6188	99.6463	96.0391	97.2104	96.9576	95.8453				0.205283	98.6238	0.817445	3	97.9631	0.846917	3	96.7272	0.786941	3
74	0.2735		97.9386	97.8579	98.4479	98.8029	97.5745	95.8527	96.3121	96.4589	94.4604				0.2735	97.6845	0.730192	3	97.2971	0.42703	3	96.2537	1.16844	3
75	0.342033		98.2962	97.9427	96.2492	97.4217	99.5958	96.6449	95.461	97.0075	95.1767				0.342033	97.0596	0.838232	3	98.182	0.756688	3	96.0236	0.43859	3
76	0.41055		99.8317	97.3489	98.5557	100.414	98.8378	95.6198	96.3593	95.6608	95.5587				0.41055	98.8685	1.2658	3	97.2825	0.917707	3	96.5781	0.98898	3
77	0.479233		98.5065	98.2609	98.5773	97.6519	99.5452	96.5983	96.5485	95.9601	95.0334				0.479233	97.569	0.566763	3	97.9221	1.04871	3	96.7363	1.02535	3
78	0.547683		99.1796	96.7338	98.4479	97.6059	100.606	95.0606	98.0615	96.1596	94.8902				0.547683	98.2823	0.467532	3	97.8333	1.39644	3	96.1329	1.15857	3
79	0.616217		98.8431	95.7794	97.327	97.6519	97.9788	96.6449	95.1773	95.6608	92.2636				0.616217	97.2241	1.07962	3	96.473	0.753658	3	95.4118	1.58639	3
80	0.684733		100.126	96.2672	97.133	99.5396	98.6357	95.3868	95.792	94.8628	94.4126				0.684733	98.4859	1.35758	3	96.5886	1.10091	3	95.6441	0.795782	3
81	0.75325		96.9499	97.5398	97.0899	99.3554	96.4123	95.3868	96.7849	93.9651	93.6963				0.75325	97.6967	0.83071	3	95.9724	1.05511	3	95.391	0.979653	3
82	0.821483		97.1393	97.0095	95.5594	99.7238	96.2102	94.8742	95.1773	94.015	93.171				0.821483	97.3468	1.31655	3	95.7449	0.895221	3	94.5348	0.71005	3
83	0.89		98.6117	95.5037	97.2623	98.5727	96.4123	93.7558	96.1702	95.8105	92.7889				0.89	97.7849	0.807415	3	95.9088	0.266867	3	94.6024	1.35896	3
84	0.958517		98.78	96.7975	95.4516	96.8232	96.9176	92.4045	97.6832	93.4663	94.6514				0.958517	97.7621	0.566247	3	95.7271	1.13094	3	94.1692	0.91208	3
85	1.02705		96.992	96.0551	95.7318	96.9153	97.1198	93.4296	96.5957	94.1147	91.595				1.02705	96.8343	0.121342	3	95.7632	0.879678	3	93.5855	1.19673	3
86	1.09555		98.1279	95.9703	93.684	99.1252	97.4229	93.5228	94.8936	93.7656	92.4069				1.09555	97.3822	1.27719	3	95.7196	1.0632	3	93.2046	0.401545	3
87	1.16407		97.5389	94.9735	94.3953	97.0074	95.7554	95.0606	94.9882	93.0175	92.5501				1.16407	96.5115	0.776956	3	94.5821	0.814247	3	94.002	0.750911	3
88	1.23258		95.772	96.5005	96.2707	95.7643	95.4017	93.0568	93.948	90.8728	90.2579				1.23258	95.1614	0.606716	3	94.2584	1.72223	3	93.1952	1.73714	3
89	1.3011		95.2882	93.5737	94.2444	97.4678	96.9176	90.7269	94.1844	91.3716	93.5053				1.3011	95.6468	0.964638	3	93.9543	1.61228	3	92.8255	1.07078	3
90	1.36962		97.3496	94.1888	94.7402	96.8692	95.9576	92.2647	95.2246	94.3142	92.2159				1.36962	96.4811	0.643398	3	94.8202	0.56984	3	93.0736	0.833448	3
91	1.43815		96.3189	94.0403	94.0073	99.2173	96.2607	92.3113	94.5626	91.7207	90.6877				1.43815	96.6996	1.3571	3	94.0072	1.3107	3	92.3354	0.958376	3
92	1.50667		96.7606	94.0191	92.8864	97.0534	94.3911	91.1929	93.617	91.8703	90.5922				1.50667	95.8103	1.09992	3	93.4268	0.785635	3	91.5572	0.686872	3
93	1.57547		95.0989	93.5313	91.8948	97.1455	95.7049	92.2647	93.2861	92.3192	90.0669				1.57547	95.1768	1.11481	3	93.8518	0.990419	3	91.4088	0.679403	3
94	1.64372		96.2558	92.0467	92.8648	95.8564	93.7342	91.9385	93.7116	91.6708	88.3954				1.64372	95.2746	0.789956	3	92.4839	0.634502	3	91.0662	1.36193	3
95	1.71223		95.162	92.3436	94.266	96.5009	93.8353	92.0317	93.3806	90.5736	89.9713				1.71223	95.0145	0.903769	3	92.2508	0.942714	3	92.0897	1.2401	3
96	1.78077		95.2882	93.2344	91.3775	96.2247	94.5427	92.5909	94.5626	92.1696	88.5864				1.78077	95.3585	0.481073	3	93.3155	0.686262	3	90.8516	1.1855	3
97	1.84928		95.5196	93.1071	90.623	96.3628	96.0586	91.8453	94.3262	90.4738	89.5893				1.84928	95.4029	0.590792	3	93.2132	1.61307	3	90.6859	0.652007	3
98	1.9178		95.8141	92.4072	91.2912	95.488	96.5639	91.3327	94.7991	92.02	90.6399				1.9178	95.367	0.299185	3	93.6637	1.45442	3	91.088	0.224336	3
99	1.98632		96.8027	91.7285	93.2097	97.0074	94.189	90.261	94.9882	91.6209	88.5387				1.98632	96.2661	0.641676	3	92.5128	0.838655	3	90.6698	1.36383	3
100	2.05485		95.2461	91.7709	89.5667	97.1915	94.7448	90.5871	95.461	90.6733	88.9685				2.05485	95.9662	0.615792	3	92.3964	1.21623	3	89.7074	0.472535	3
101	2.1233		95.6037	91.8982	92.5199	95.488	94.3406	90.6337	91.5839	90.5736	89.0162				2.1233	94.2252	1.32107	3	92.2708	1.10328	3	90.7233	1.01242	3
102	2.19182		94.7413	92.1739	92.0241	95.1657	93.8858	91.8453	93.5697	90.9726	89.6371				2.19182	94.4923	0.477256	3	92.3441	0.845271	3	91.1688	0.767623	3
103	2.2605		94.9937	92.7041	88.726	94.6593	92.8752	89.795	92.4823	90.2743	88.2044				2.2605	94.0451	0.787348	3	91.9512	0.839904	3	88.9085	0.468134	3
104	2.32898		93.4371	91.2831	88.6398	95.7182	94.3911	89.2358	92.766	88.7781	88.3954				2.32898	93.9738	0.89349	3	91.4841	1.62346	3	88.757	0.249572	3
105	2.39748		94.5309	91.0498	89.4805	94.9355	94.5427	90.9133	93.5697	89.9252	88.2521				2.39748	94.3454	0.405037	3	91.8392	1.39017	3	89.5487	0.768972	3
106	2.46598		94.1733	91.7497	91.3343	94.1989	93.1278	89.0494	94.1844	90.1247	88.2044				2.46598	94.1855	0.00740353	3	91.6674	0.867911	3	89.5294	0.934868	3
107	2.5345		95.1409	90.8802	89.6529	95.5341	93.6837	88.863	93.3333	89.6758	88.2044				2.5345	94.6694	0.677628	3	91.4132	1.18727	3	88.9068	0.418733	3
108	2.6028		94.9516	91.6649	90.4721	95.3959	92.4204	87.7446	93.0969	90.2743	87.4881				2.6028	94.4815	0.704067	3	91.4532	0.628503	3	88.5683	0.954787	3
109	2.67132		95.3723	91.2195	88.4027	94.7514	93.0268	88.4436	93.6643	88.9277	87.4403				2.67132	94.596	0.499146	3	91.058	1.18606	3	88.0955	0.327825	3
110	2.73983		95.0989	91.3892	90.6661	95.3499	92.0667	90.3075	94.0426	90.1746	87.1538				2.73983	94.8304	0.400556	3	91.2101	0.5535	3	89.3758	1.11583	3
111	2.80835		94.5309	92.0255	89.502	94.1068	93.0268	89.562	92.5768	88.9277	88.2521				2.80835	93.7382	0.593445	3	91.3266	1.23382	3	89.1054	0.426972	3
112	2.87688		94.9516	89.8197	87.9069	96.0405	93.1278	87.8844	92.766	88.8778	86.8672				2.87688	94.586	0.962796	3	90.6085	1.2887	3	87.5529	0.342868	3
113	2.94567		94.3416	91.5164	89.9332	94.6133	92.6731	88.9096	93.8534	90.5237	87.4881				2.94567	94.2694	0.222293	3	91.5711	0.621073	3	88.7769	0.708955	3
114	3.01392		93.6475	91.0923	86.98	94.9816	92.3699	89.562	92.6241	87.0324	87.5358				3.01392	93.751	0.682511	3	90.1649	1.60906	3	88.0259	0.784616	3
115	3.08245		93.7316	90.1803	87.562	96.3168	92.8752	90.4473	92.9551	89.0274	86.724				3.08245	94.3345	1.01617	3	90.6943	1.1401	3	88.2444	1.12771	3
116	3.15097		93.7737	91.368	88.9847	95.488	91.3087	88.863	91.4421	88.5287	86.8195				3.15097	93.5679	1.17249	3	90.4018	0.936714	3	88.2224	0.702334	3
117	3.2195		93.8578	90.9014	88.7045	94.8895	91.9151	88.5834	93.4752	88.7282	87.0583				3.2195	94.0742	0.422368	3	90.5149	0.940064	3	88.1154	0.529712	3
118	3.28802		93.5212	90.9862	89.5452	94.1529	93.2794	88.9562	92.1513	88.1796	85.9121				3.28802	93.2751	0.590757	3	90.8151	1.47469	3	88.1378	1.12576	3
119	3.35653		93.984	90.7529	89.0494	95.6722	93.1278	87.5116	91.7258	88.1297	86.1987				3.35653	93.794	1.14319	3	90.6701	1.44344	3	87.5866	0.823778	3
120	3.42528		93.5423	90.053	90.7739	95.8103	91.814	88.0242	92.5768	86.8828	85.9599				3.42528	93.9765	0.958339	3	89.5833	1.44278	3	88.2527	1.39436	3
121	3.49355		93.9209	90.5832	89.8469	94.0608	91.7635	87.7446	93.0496	88.0299	87.0105				3.49355	93.6771	0.316317	3	90.1256	1.10182	3	88.2007	0.849969	3
122	3.56238		93.2899	90.2651	86.8075	94.5672	91.4098	88.5368	91.6785	88.4289	86.1032				3.56238	93.1785	0.835761	3	90.0346	0.868186	3	87.1492	0.723008	3
123	3.63082		94.3206	91.071	87.562	94.7514	91.4603	87.2321	92.0095	85.8354	84.384				3.63082	93.6938	0.851305	3	89.4556	1.81358	3	86.3927	1.00886	3
124	3.69905		93.1216	89.4168	90.3859	93.7385	92.8247	87.8844	91.9622	88.3791	84.7182				3.69905	92.9407	0.52069	3	90.2068	1.34276	3	87.6628	1.63985	3
125	3.7677		93.1637	91.4104	87.0446	96.0405	92.3194	88.9096	92.1986	87.1322	86.9628				3.7677	93.8009	1.15394	3	90.2873	1.59924	3	87.639	0.635744	3
126	3.83615		93.6895	89.8621	89.2003	95.0737	91.1572	87.7446	91.4894	87.2319	84.7182				3.83615	93.4175	1.0436	3	89.4171	1.15476	3	87.221	1.32007	3
127	3.9047		94.8254	89.8409	88.9631	93.0479	92.1678	87.4651	92.1513	88.1796	85.6734				3.9047	93.3415	0.785788	3	90.0627	1.15663	3	87.3672	0.95094	3
128	3.97322		93.2478	89.9046	88.8338	94.5672	92.2183	87.3253	91.0165	86.9327	84.1929				3.97322	92.9439	1.03619	3	89.6852	1.52976	3	86.784	1.36677	3
129	4.042		94.2575	88.7169	86.3979	94.0608	92.1172	86.3001	91.4421	86.1347	83.1423				4.042	93.2534	0.907458	3	88.9896	1.73239	3	85.2801	1.06927	3
130	4.11025		93.8999	89.6076	88.2302	92.6335	90.854	87.2321	91.8676	87.182	86.4374				4.11025	92.8003	0.592562	3	89.2146	1.07806	3	87.2999	0.518642	3
131	4.17877		93.7526	89.2683	85.2986	96.2247	91.1066	86.9525	91.5366	85.985	83.8586				4.17877	93.838	1.35399	3	88.7866	1.49796	3	85.3699	0.893824	3
132	4.2473		92.3012	89.4804	86.2901	93.2781	89.9444	86.0205	92.9551	87.9302	85.4346				4.2473	92.8448	0.287336	3	89.1183	0.608992	3	85.9151	0.252547	3
133	4.31582		94.4257	89.544	88.7691	95.5341	89.0854	85.7875	91.5366	85.985	85.9121				4.31582	93.8322	1.19152	3	88.2048	1.11776	3	86.8229	0.973768	3
134	4.38435		93.0795	89.0986	85.6866	94.5212	90.096	86.1137	91.8203	86.1347	85.2436				4.38435	93.1403	0.780261	3	88.4431	1.18959	3	85.6813	0.251205	3
135	4.45287		94.7833	88.6957	86.9368	93.4162	90.1465	86.3467	92.104	85.8354	84.5272				4.45287	93.4345	0.773507	3	88.2259	1.26649	3	85.9369	0.725144	3
136	4.5214		92.5116	88.6532	88.0362	92.4033	88.9843	86.4865	92.5296	85.1372	84.2407				4.5214	92.4815	0.0394265	3	87.5916	1.23093	3	86.2545	1.1018	3
137	4.58992		93.4581	88.9926	83.6603	92.7716	91.0561	85.3215	91.4894	84.8878	84.575				4.58992	92.573	0.576947	3	88.3122	1.81285	3	84.5189	0.480383	3
138	4.65845		93.2688	89.9258	84.0914	93.5083	91.3087	86.1137	92.6241	85.1372	84.1929				4.65845	93.1337	0.264026	3	88.7906	1.86982	3	84.7993	0.657832	3
139	4.72697		94.8464	89.141	87.9284	93.9687	91.7635	84.9487	93.3333	86.6334	85.1003				4.72697	94.0495	0.438664	3	89.1793	1.48106	3	85.9925	0.96896	3
140	4.79547		92.5326	88.4199	85.8375	94.1989	88.1758	86.5797	91.1584	85.7357	83.9542				4.79547	92.63	0.879069	3	87.4438	0.85698	3	85.4571	0.781422	3
141	4.864		94.3837	90.4348	85.0614	95.1197	89.3886	85.3215	90.9693	86.0349	81.9007				4.864	93.4909	1.27859	3	88.6194	1.32708	3	84.0945	1.0995	3
142	4.93253		93.0585	90.4772	82.8196	95.0737	90.3992	85.8807	91.9149	84.7382	82.808				4.93253	93.349	0.923357	3	88.5382	1.90015	3	83.8361	1.02231	3
143	5.00103		92.2802	88.7593	84.5225	93.5083	90.5508	85.6477	91.5366	85.3367	84.0497				5.00103	92.4417	0.574867	3	88.2156	1.52954	3	84.74	0.473956	3
144	5.06957		95.4775	88.9926	85.7728	93.8766	90.6013	86.1137	92.0095	85.0873	83.6676				5.06957	93.7879	1.00212	3	88.2271	1.63714	3	85.1847	0.7649	3
145	5.13808		93.6264	88.6744	86.2039	95.7182	91.7635	84.7623	90.7801	86.0349	83.9064				5.13808	93.3749	1.43104	3	88.8243	1.6554	3	84.9576	0.67038	3
146	5.2066		94.2995	89.6501	82.7765	93.2781	91.5614	84.9021	90.7801	86.9825	85.0048				5.2066	92.7859	1.04534	3	89.398	1.32779	3	84.2278	0.726271	3
147	5.27512		94.573	89.5864	85.6435	91.4365	90.7529	86.7195	90.2128	85.6359	85.0048				5.27512	92.0741	1.29843	3	88.6584	1.54831	3	85.7892	0.500329	3
148	5.34363		94.8675	89.2895	85.2123	94.6593	90.6013	85.9273	90.7801	85.3367	82.617				5.34363	93.4356	1.32911	3	88.4092	1.58223	3	84.5855	1.00568	3
149	5.41217		94.3626	88.5896	82.8411	92.7256	89.2875	86.6263	91.8203	85.4863	83.4766				5.41217	92.9695	0.743967	3	87.7878	1.16826	3	84.3147	1.17027	3
150	6.63178		85.7173	17.6034	16.0811	92.6335	32.1374	18.7791	84.9645	23.2419	18.6724				6.63178	87.7718	2.44056	3	24.3276	4.23059	3	17.8442	0.882108	3
151	6.70005		86.769	17.2216	15.1757	90.884	32.0364	19.5247	83.6879	23.7406	17.1442				6.70005	87.1137	2.08445	3	24.3329	4.28689	3	17.2815	1.25733	3
152	6.76857		86.3483	17.3913	14.141	91.7127	32.6427	19.6179	82.2222	25.187	17.8128				6.76857	86.7611	2.74743	3	25.0737	4.40308	3	17.1906	1.61137	3
153	6.8371		87.2108	17.4337	14.0332	91.5746	33.047	19.9441	82.2695	25.586	19.0544				6.8371	87.0183	2.68787	3	25.3556	4.50864	3	17.6772	1.84003	3
154	6.90562		86.1801	17.3489	13.2356	90.6998	32.5417	19.1053	84.208	26.0848	18.6724				6.90562	87.0293	1.92152	3	25.3251	4.4022	3	17.0044	1.88855	3
155	6.97413		86.0959	17.4337	13.5805	90.1473	33.1986	19.0121	83.5934	25.8354	18.9589				6.97413	86.6122	1.90949	3	25.4892	4.55422	3	17.1839	1.80174	3
156	7.04265		87.2318	17.7094	12.8692	90.93	32.4912	18.6859	83.8298	25.6359	17.9083				7.04265	87.3305	2.05025	3	25.2788	4.27085	3	16.4878	1.8232	3
157	7.11117		87.0635	17.667	12.4596	91.4825	32.3901	18.4995	84.4917	25.7357	17.765				7.11117	87.6793	2.04141	3	25.2643	4.25672	3	16.2414	1.90275	3
158	7.17968		85.5069	17.4761	12.1793	90.0552	32.7438	17.8472	80.6619	25.3367	17.0965				7.17968	85.408	2.71207	3	25.1855	4.40804	3	15.7077	1.77742	3
159	7.2482		86.0538	17.4761	11.9207	91.7587	33.5018	18.6393	82.5532	24.4888	16.8577				7.2482	86.7886	2.68269	3	25.1556	4.6382	3	15.8059	2.00954	3
160	7.31673		85.1704	18.0488	11.8991	91.8048	33.047	17.8006	81.9858	24.2893	16.1414				7.31673	86.3203	2.89222	3	25.1284	4.34989	3	15.2803	1.75715	3
			Mn Concentrations
			0	50	400	0	50	400	0	50	400
			5725	5666	5780	2742	2705	2717	2931	2846	2897
			5819	5617	5781	2731	2666	2703	2914	2826	2902
			5729	5592	5797	2717	2749	2602	2890	2795	2914
			5723	5730	5741	2662	2712	2649	2863	2829	2883
			5703	5591	5630	2679	2698	2639	2912	2822	2848
			5770	5594	5579	2627	2690	2662	2866	2818	2907
			5631	5579	5580	2625	2640	2622	2867	2765	2874
			5589	5529	5504	2596	2628	2597	2839	2796	2867
			5623	5503	5563	2613	2603	2590	2857	2744	2809
			5626	5542	5501	2541	2616	2566	2802	2887	2784
			5621	5570	5599	2554	2597	2561	2908	2778	2887
			5654	5492	5535	2560	2573	2578	2795	2781	2815
			5482	5462	5543	2576	2576	2548	2777	2807	2813
			5434	5442	5496	2559	2602	2577	2761	2785	2799
			5537	5541	5517	2528	2583	2538	2768	2775	2815
			5448	5402	5372	2537	2560	2559	2787	2759	2817
			5462	5370	5319	2578	2550	2536	2790	2736	2807
			5357	5321	5367	2546	2569	2526	2764	2745	2772
			5301	5316	5316	2562	2564	2515	2738	2718	2781
			5362	5327	5342	2518	2520	2590	2773	2733	2796
			5324	5263	5226	2507	2515	2567	2731	2711	2749
			5227	5256	5283	2534	2523	2516	2763	2687	2777
			5184	5289	5237	2542	2522	2457	2749	2714	2751
			5248	5233	5253	2506	2517	2516	2764	2719	2739
			5251	5180	5136	2498	2536	2487	2730	2672	2735
			5249	5176	5099	2521	2571	2502	2718	2693	2725
			5225	5196	5217	2505	2504	2509	2693	2735	2716
			5181	5157	5062	2488	2517	2492	2740	2678	2719
			5190	5196	5253	2472	2501	2533	2682	2665	2673
			5232	5121	5128	2489	2500	2521	2685	2673	2701
			5112	5228	5060	2460	2507	2477	2700	2668	2637
			5069	5075	5075	2498	2481	2492	2719	2637	2636
			5082	5078	5012	2445	2469	2541	2638	2656	2603
			5073	5022	5098	2440	2457	2484	2690	2634	2642
			5032	5011	5055	2481	2403	2477	2689	2578	2598
			5050	4979	5042	2406	2509	2503	2614	2576	2645
			5007	4945	4987	2442	2457	2482	2649	2542	2627
			4977	4947	5025	2438	2429	2456	2618	2570	2602
			4997	4974	5003	2467	2475	2490	2621	2565	2574
			4969	4976	4960	2424	2446	2477	2594	2558	2578
			5003	5043	4967	2429	2427	2479	2533	2546	2601
			4942	4989	4961	2427	2463	2464	2623	2566	2582
			4925	4919	5059	2419	2396	2492	2595	2559	2572
			4970	4912	4911	2422	2436	2464	2566	2498	2574
			4835	4893	4983	2392	2427	2466	2567	2468	2566
			4957	4856	5038	2393	2420	2409	2532	2489	2559
			4889	4847	4959	2376	2430	2480	2529	2486	2545
			4912	4926	4998	2409	2398	2395	2496	2461	2554
			4821	4898	4834	2390	2440	2435	2472	2473	2517
			4496	4669	4675	2374	2367	2396	2392	2382	2417
			4506	4690	4697	2336	2331	2353	2394	2362	2481
			4549	4709	4669	2349	2330	2344	2379	2310	2387
			4525	4656	4687	2357	2281	2383	2383	2298	2408
			4520	4614	4688	2344	2285	2351	2350	2322	2397
			4526	4582	4627	2316	2273	2370	2331	2293	2451
			4462	4629	4635	2355	2264	2379	2304	2311	2403
			4519	4560	4537	2338	2287	2348	2370	2317	2381
			4451	4621	4677	2353	2266	2373	2330	2249	2386
			4419	4567	4656	2295	2244	2369	2299	2255	2394
			4464	4680	4597	2345	2275	2375	2315	2287	2335
			4531	4620	4600	2377	2256	2378	2337	2267	2352
			4496	4595	4668	2364	2236	2366	2312	2251	2326
			4389	4617	4653	2338	2220	2334	2283	2273	2343
			4491	4553	4483	2289	2235	2321	2307	2239	2344
			4426	4602	4514	2340	2250	2368	2313	2234	2328
			4412	4661	4629	2341	2257	2390	2257	2223	2302
			4434	4585	4600	2334	2240	2373	2274	2239	2273
			4466	4573	4667	2355	2236	2360	2263	2175	2290
			4395	4541	4546	2379	2230	2404	2228	2187	2278
			4754	4715	4639	2172	1979	2146	2115	2005	2094
			4770	4637	4636	2159	1993	2145	2095	1981	2063
			4794	4658	4533	2166	1949	2097	2076	1960	2030
			4756	4587	4560	2142	1972	2061	2056	1944	2007
			4656	4614	4567	2146	1931	2057	2037	1934	1978
			4673	4618	4465	2116	1971	2074	2019	1945	1993
			4746	4590	4572	2181	1956	2052	2038	1918	2001
			4683	4633	4573	2121	1970	2073	2042	1924	1990
			4715	4561	4567	2120	1991	2040	2074	1928	1987
			4699	4516	4515	2121	1939	2074	2013	1918	1932
			4760	4539	4506	2162	1952	2047	2026	1902	1977
			4609	4599	4504	2158	1908	2047	2047	1884	1962
			4618	4574	4433	2166	1904	2036	2013	1885	1951
			4688	4503	4512	2141	1908	2012	2034	1921	1943
			4696	4564	4428	2103	1918	1983	2066	1874	1982
			4611	4529	4441	2105	1922	2005	2043	1887	1918
			4665	4525	4346	2153	1928	2007	2007	1880	1935
			4637	4478	4379	2107	1895	2040	2009	1865	1938
			4553	4550	4466	2080	1888	1997	1987	1822	1890
			4530	4412	4372	2117	1918	1947	1992	1832	1958
			4628	4441	4395	2104	1899	1980	2014	1891	1931
			4579	4434	4361	2155	1905	1981	2000	1839	1899
			4600	4433	4309	2108	1868	1957	1980	1842	1897
			4521	4410	4263	2110	1894	1980	1973	1851	1886
			4576	4340	4308	2082	1855	1973	1982	1838	1851
			4524	4354	4373	2096	1857	1975	1975	1816	1884
			4530	4396	4239	2090	1871	1987	2000	1848	1855
			4541	4390	4204	2093	1901	1971	1995	1814	1876
			4555	4357	4235	2074	1911	1960	2005	1845	1898
			4602	4325	4324	2107	1864	1937	2009	1837	1854
			4528	4327	4155	2111	1875	1944	2019	1818	1863
			4545	4333	4292	2074	1867	1945	1937	1816	1864
			4504	4346	4269	2067	1858	1971	1979	1824	1877
			4516	4371	4116	2056	1838	1927	1956	1810	1847
			4442	4304	4112	2079	1868	1915	1962	1780	1851
			4494	4293	4151	2062	1871	1951	1979	1803	1848
			4477	4326	4237	2046	1843	1911	1992	1807	1847
			4523	4285	4159	2075	1854	1907	1974	1798	1847
			4514	4322	4197	2072	1829	1883	1969	1810	1832
			4534	4301	4101	2058	1841	1898	1981	1783	1831
			4521	4309	4206	2071	1822	1938	1989	1808	1825
			4494	4339	4152	2044	1841	1922	1958	1783	1848
			4514	4235	4078	2086	1843	1886	1962	1782	1819
			4485	4315	4172	2055	1834	1908	1985	1815	1832
			4452	4295	4035	2063	1828	1922	1959	1745	1833
			4456	4252	4062	2092	1838	1941	1966	1785	1816
			4458	4308	4128	2074	1807	1907	1934	1775	1818
			4462	4286	4115	2061	1819	1901	1977	1779	1823
			4446	4290	4154	2045	1846	1909	1949	1768	1799
			4468	4279	4131	2078	1843	1878	1940	1767	1805
			4447	4246	4211	2081	1817	1889	1958	1742	1800
			4465	4271	4168	2043	1816	1883	1968	1765	1822
			4435	4256	4027	2054	1809	1900	1939	1773	1803
			4484	4294	4062	2058	1810	1872	1946	1721	1767
			4427	4216	4193	2036	1837	1886	1945	1772	1774
			4429	4310	4038	2086	1827	1908	1950	1747	1821
			4454	4237	4138	2065	1804	1883	1935	1749	1774
			4508	4236	4127	2021	1824	1877	1949	1768	1794
			4433	4239	4121	2054	1825	1874	1925	1743	1763
			4481	4183	4008	2043	1823	1852	1934	1727	1741
			4464	4225	4093	2012	1798	1872	1943	1748	1810
			4457	4209	3957	2090	1803	1866	1936	1724	1756
			4388	4219	4003	2026	1780	1846	1966	1763	1789
			4489	4222	4118	2075	1763	1841	1936	1724	1799
			4425	4201	3975	2053	1783	1848	1942	1727	1785
			4506	4182	4033	2029	1784	1853	1948	1721	1770
			4398	4180	4084	2007	1761	1856	1957	1707	1764
			4443	4196	3881	2015	1802	1831	1935	1702	1771
			4434	4240	3901	2031	1807	1848	1959	1707	1763
			4509	4203	4079	2041	1816	1823	1974	1737	1782
			4399	4169	3982	2046	1745	1858	1928	1719	1758
			4487	4264	3946	2066	1769	1831	1924	1725	1715
			4424	4266	3842	2065	1789	1843	1944	1699	1734
			4387	4185	3921	2031	1792	1838	1936	1711	1760
			4539	4196	3979	2039	1793	1848	1946	1706	1752
			4451	4181	3999	2079	1816	1819	1920	1725	1757
			4483	4227	3840	2026	1812	1822	1920	1744	1780
			4496	4224	3973	1986	1796	1861	1908	1717	1780
			4510	4210	3953	2056	1793	1844	1920	1711	1730
			4486	4177	3843	2014	1767	1859	1942	1714	1748
			4075	830	746	2012	636	403	1797	466	391
			4125	812	704	1974	634	419	1770	476	359
			4105	820	656	1992	646	421	1739	505	373
			4146	822	651	1989	654	428	1740	513	399
			4097	818	614	1970	644	410	1781	523	391
			4093	822	630	1958	657	408	1768	518	397
			4147	835	597	1975	643	401	1773	514	375
			4139	833	578	1987	641	397	1787	516	372
			4065	824	565	1956	648	383	1706	508	358
			4091	824	553	1993	663	400	1746	491	353
			4049	851	552	1994	654	382	1734	487	338

## Sheet: Figure5F_ITC_T241V_rawData
sec	ucal/sec		min	ucal/sec
3	-0.00307		0.05	-0.00307
4	-0.00419		0.0666667	-0.00419
5	-0.00439		0.0833333	-0.00439
6	-0.00322		0.1	-0.00322
7	-0.00136		0.116667	-0.00136
8	-0.00114		0.133333	-0.00114
9	-0.000908234		0.15	-0.000908234
10	-0.00259		0.166667	-0.00259
11	-0.0017		0.183333	-0.0017
12	-0.0013		0.2	-0.0013
13	-0.000965293		0.216667	-0.000965293
14	-0.0016		0.233333	-0.0016
15	-0.000973822		0.25	-0.000973822
16	0.00122		0.266667	0.00122
17	0.00256		0.283333	0.00256
18	0.00102		0.3	0.00102
19	-0.000260881		0.316667	-0.000260881
20	-0.000330146		0.333333	-0.000330146
21	0.00183		0.35	0.00183
22	0.00163		0.366667	0.00163
23	0.00094206		0.383333	0.00094206
24	1.27952e-05		0.4	1.27952e-05
25	0.00055353		0.416667	0.00055353
26	0.000764266		0.433333	0.000764266
27	0.000255001		0.45	0.000255001
28	-0.00115		0.466667	-0.00115
29	-0.00203		0.483333	-0.00203
30	-0.00294		0.5	-0.00294
31	-0.00218		0.516667	-0.00218
32	-0.0018		0.533333	-0.0018
33	-0.000180587		0.55	-0.000180587
34	0.000330148		0.566667	0.000330148
35	0.00101		0.583333	0.00101
36	0.00111		0.6	0.00111
37	0.00154		0.616667	0.00154
38	0.00234		0.633333	0.00234
39	0.00297		0.65	0.00297
40	0.00384		0.666667	0.00384
41	0.00377		0.683333	0.00377
42	0.00244		0.7	0.00244
43	0.000336765		0.716667	0.000336765
44	-0.00157		0.733333	-0.00157
45	-0.00272		0.75	-0.00272
46	-0.00375		0.766667	-0.00375
47	-0.00364		0.783333	-0.00364
48	-0.00201		0.8	-0.00201
49	0.00123		0.816667	0.00123
50	0.00176		0.833333	0.00176
51	0.00105		0.85	0.00105
52	-0.00147		0.866667	-0.00147
53	-0.00203		0.883333	-0.00203
54	-0.00141		0.9	-0.00141
55	-0.000674412		0.916667	-0.000674412
56	0.00126		0.933333	0.00126
57	0.000977059		0.95	0.000977059
58	0.000737794		0.966667	0.000737794
59	-0.000711471		0.983333	-0.000711471
60	-0.000260735		1	-0.000260735
61	0		1.01667	0
62	0.00183		1.03333	0.00183
63	0.00178		1.05	0.00178
64	0.00206		1.06667	0.00206
65	-0.000807059		1.08333	-0.000807059
66	-0.00291		1.1	-0.00291
67	-0.00311		1.11667	-0.00311
68	-5.48532e-05		1.13333	-5.48532e-05
69	0.0026		1.15	0.0026
70	0.00337		1.16667	0.00337
71	0.00339		1.18333	0.00339
72	0.00295		1.2	0.00295
73	0.00311		1.21667	0.00311
74	0.00336		1.23333	0.00336
75	0.00572		1.25	0.00572
76	0.00638		1.26667	0.00638
77	0.00487		1.28333	0.00487
78	0.00198		1.3	0.00198
79	-2.67652e-05		1.31667	-2.67652e-05
80	-0.00096603		1.33333	-0.00096603
81	0.000144705		1.35	0.000144705
82	-0.000934559		1.36667	-0.000934559
83	-9.38242e-05		1.38333	-9.38242e-05
84	-0.00276		1.4	-0.00276
85	-0.000812354		1.41667	-0.000812354
86	-0.00277		1.43333	-0.00277
87	-0.00189		1.45	-0.00189
88	-0.00267		1.46667	-0.00267
89	0.00146		1.48333	0.00146
90	0.00274		1.5	0.00274
91	0.00349		1.51667	0.00349
92	0.000522793		1.53333	0.000522793
93	-0.00172		1.55	-0.00172
94	-0.00144		1.56667	-0.00144
95	0.000514999		1.58333	0.000514999
96	0.00188		1.6	0.00188
97	0.00293		1.61667	0.00293
98	-0.000632795		1.63333	-0.000632795
99	-0.00069206		1.65	-0.00069206
100	-0.00439		1.66667	-0.00439
101	-0.00223		1.68333	-0.00223
102	-0.00195		1.7	-0.00195
103	-0.00147		1.71667	-0.00147
104	-0.00319		1.73333	-0.00319
105	-0.00447		1.75	-0.00447
106	-0.00288		1.76667	-0.00288
107	-0.00197		1.78333	-0.00197
108	-0.000405443		1.8	-0.000405443
109	-0.00111		1.81667	-0.00111
110	-0.00127		1.83333	-0.00127
111	-0.00145		1.85	-0.00145
112	-0.00103		1.86667	-0.00103
113	-0.00144		1.88333	-0.00144
114	-0.00165		1.9	-0.00165
115	-0.000680296		1.91667	-0.000680296
116	0.00031044		1.93333	0.00031044
117	-0.00107		1.95	-0.00107
118	-0.00137		1.96667	-0.00137
119	-0.00104		1.98333	-0.00104
120	0.000173381		2	0.000173381
121	-0.00146		2.01667	-0.00146
122	-0.000985149		2.03333	-0.000985149
123	0.00168		2.05	0.00168
124	0.00476		2.06667	0.00476
125	0.00447		2.08333	0.00447
126	0.00252		2.1	0.00252
127	0.00127		2.11667	0.00127
128	0.00177		2.13333	0.00177
129	0.00324		2.15	0.00324
130	0.00333		2.16667	0.00333
131	0.00196		2.18333	0.00196
132	0.000182204		2.2	0.000182204
133	0.00114		2.21667	0.00114
134	0.00311		2.23333	0.00311
135	0.00335		2.25	0.00335
136	0.000305145		2.26667	0.000305145
137	-0.00264		2.28333	-0.00264
138	-0.00339		2.3	-0.00339
139	-0.0022		2.31667	-0.0022
140	-0.00183		2.33333	-0.00183
141	-0.00388		2.35	-0.00388
142	-0.00388		2.36667	-0.00388
143	-0.00401		2.38333	-0.00401
144	-0.00177		2.4	-0.00177
145	-0.00196		2.41667	-0.00196
146	-0.000957503		2.43333	-0.000957503
147	0.000823233		2.45	0.000823233
148	0.00191		2.46667	0.00191
149	0.00246		2.48333	0.00246
150	0.000435439		2.5	0.000435439
151	0.00116		2.51667	0.00116
152	0.00198		2.53333	0.00198
153	0.00145		2.55	0.00145
154	-0.00244		2.56667	-0.00244
155	-0.00571		2.58333	-0.00571
156	-0.0047		2.6	-0.0047
157	-0.00205		2.61667	-0.00205
158	0.000161321		2.63333	0.000161321
159	-0.00118		2.65	-0.00118
160	-0.00176		2.66667	-0.00176
161	-0.00271		2.68333	-0.00271
162	-0.00198		2.7	-0.00198
163	-0.00258		2.71667	-0.00258
164	-0.00158		2.73333	-0.00158
165	-0.00331		2.75	-0.00331
166	-0.00305		2.76667	-0.00305
167	-0.00476		2.78333	-0.00476
168	-0.0038		2.8	-0.0038
169	-0.00365		2.81667	-0.00365
170	-0.00315		2.83333	-0.00315
171	-0.000969121		2.85	-0.000969121
172	0.000161614		2.86667	0.000161614
173	0.00151		2.88333	0.00151
174	0.00166		2.9	0.00166
175	0.00166		2.91667	0.00166
176	0.00205		2.93333	0.00205
177	0.00202		2.95	0.00202
178	0.00248		2.96667	0.00248
179	0.00155		2.98333	0.00155
180	0.000547496		3	0.000547496
181	0.00124		3.01667	0.00124
182	0.0021		3.03333	0.0021
183	0.00206		3.05	0.00206
184	0.00104		3.06667	0.00104
185	-0.00153		3.08333	-0.00153
186	-0.00244		3.1	-0.00244
187	-0.0024		3.11667	-0.0024
188	-0.000346621		3.13333	-0.000346621
189	0.000644114		3.15	0.000644114
190	-0.00144		3.16667	-0.00144
191	-0.00153		3.18333	-0.00153
192	-0.00237		3.2	-0.00237
193	-0.00169		3.21667	-0.00169
194	-0.00185		3.23333	-0.00185
195	-0.00124		3.25	-0.00124
196	-0.00281		3.26667	-0.00281
197	-0.00519		3.28333	-0.00519
198	-0.0075		3.3	-0.0075
199	-0.00717		3.31667	-0.00717
200	-0.00411		3.33333	-0.00411
201	-0.000507063		3.35	-0.000507063
202	0.00279		3.36667	0.00279
203	0.00195		3.38333	0.00195
204	0.000475143		3.4	0.000475143
205	-0.00292		3.41667	-0.00292
206	-0.00542		3.43333	-0.00542
207	-0.00822		3.45	-0.00822
208	-0.00742		3.46667	-0.00742
209	-0.00637		3.48333	-0.00637
210	-0.00365		3.5	-0.00365
211	-0.00287		3.51667	-0.00287
212	-0.00154		3.53333	-0.00154
213	-0.00121		3.55	-0.00121
214	-0.000895602		3.56667	-0.000895602
215	-0.000981874		3.58333	-0.000981874
216	0.000141854		3.6	0.000141854
217	-0.000744418		3.61667	-0.000744418
218	-0.00177		3.63333	-0.00177
219	-0.00413		3.65	-0.00413
220	-0.00361		3.66667	-0.00361
221	-0.00196		3.68333	-0.00196
222	0.000544222		3.7	0.000544222
223	0.00272		3.71667	0.00272
224	0.00364		3.73333	0.00364
225	0.00259		3.75	0.00259
226	0.00216		3.76667	0.00216
227	0.00164		3.78333	0.00164
228	0.00127		3.8	0.00127
229	-0.000889682		3.81667	-0.000889682
230	-0.00146		3.83333	-0.00146
231	-0.000262226		3.85	-0.000262226
232	0.00147		3.86667	0.00147
233	0.00097523		3.88333	0.00097523
234	0.000238958		3.9	0.000238958
235	-0.00192		3.91667	-0.00192
236	-0.00106		3.93333	-0.00106
237	-0.000989858		3.95	-0.000989858
238	-0.00026613		3.96667	-0.00026613
239	-0.000942402		3.98333	-0.000942402
240	-8.6745e-06		4	-8.6745e-06
241	0.00203		4.01667	0.00203
242	0.0059		4.03333	0.0059
243	0.00671		4.05	0.00671
244	0.00157		4.06667	0.00157
245	-0.01024		4.08333	-0.01024
246	-0.02467		4.1	-0.02467
247	-0.03536		4.11667	-0.03536
248	-0.03736		4.13333	-0.03736
249	-0.02977		4.15	-0.02977
250	-0.0157		4.16667	-0.0157
251	-0.00261		4.18333	-0.00261
252	0.00758		4.2	0.00758
253	0.01422		4.21667	0.01422
254	0.01941		4.23333	0.01941
255	0.02291		4.25	0.02291
256	0.02473		4.26667	0.02473
257	0.02173		4.28333	0.02173
258	0.0184		4.3	0.0184
259	0.01371		4.31667	0.01371
260	0.00894		4.33333	0.00894
261	0.00422		4.35	0.00422
262	0.00152		4.36667	0.00152
263	0.00316		4.38333	0.00316
264	0.00315		4.4	0.00315
265	0.00228		4.41667	0.00228
266	0.00128		4.43333	0.00128
267	0.00141		4.45	0.00141
268	0.00169		4.46667	0.00169
269	0.00157		4.48333	0.00157
270	0.00225		4.5	0.00225
271	0.00192		4.51667	0.00192
272	0.00187		4.53333	0.00187
273	-0.000938374		4.55	-0.000938374
274	-0.00137		4.56667	-0.00137
275	-0.00245		4.58333	-0.00245
276	-0.000530113		4.6	-0.000530113
277	0.00217		4.61667	0.00217
278	0.00238		4.63333	0.00238
279	0.000138147		4.65	0.000138147
280	-0.00305		4.66667	-0.00305
281	-0.0059		4.68333	-0.0059
282	-0.00697		4.7	-0.00697
283	-0.0062		4.71667	-0.0062
284	-0.00408		4.73333	-0.00408
285	-0.00149		4.75	-0.00149
286	-0.000982579		4.76667	-0.000982579
287	-0.000389825		4.78333	-0.000389825
288	-0.000467072		4.8	-0.000467072
289	-0.00149		4.81667	-0.00149
290	-6.15649e-05		4.83333	-6.15649e-05
291	0.00226		4.85	0.00226
292	0.00602		4.86667	0.00602
293	0.00441		4.88333	0.00441
294	0.00302		4.9	0.00302
295	0.00145		4.91667	0.00145
296	0.00228		4.93333	0.00228
297	0.00162		4.95	0.00162
298	0.00216		4.96667	0.00216
299	0.00284		4.98333	0.00284
300	0.00603		5	0.00603
301	0.00584		5.01667	0.00584
302	0.00863		5.03333	0.00863
303	0.00723		5.05	0.00723
304	0.00705		5.06667	0.00705
305	0.00595		5.08333	0.00595
306	0.00431		5.1	0.00431
307	0.00305		5.11667	0.00305
308	0.00354		5.13333	0.00354
309	0.00617		5.15	0.00617
310	0.00768		5.16667	0.00768
311	0.00712		5.18333	0.00712
312	0.00762		5.2	0.00762
313	0.00718		5.21667	0.00718
314	0.00698		5.23333	0.00698
315	0.00562		5.25	0.00562
316	0.00512		5.26667	0.00512
317	0.00207		5.28333	0.00207
318	-0.000744468		5.3	-0.000744468
319	-0.00124		5.31667	-0.00124
320	-0.00257		5.33333	-0.00257
321	-0.00189		5.35	-0.00189
322	-0.00167		5.36667	-0.00167
323	0.000739299		5.38333	0.000739299
324	0.000972053		5.4	0.000972053
325	0.00167		5.41667	0.00167
326	0.00342		5.43333	0.00342
327	0.00479		5.45	0.00479
328	0.00481		5.46667	0.00481
329	0.00466		5.48333	0.00466
330	0.00373		5.5	0.00373
331	0.00245		5.51667	0.00245
332	0.00114		5.53333	0.00114
333	7.6834e-05		5.55	7.6834e-05
334	0.000229587		5.56667	0.000229587
335	0.000202341		5.58333	0.000202341
336	0.000955094		5.6	0.000955094
337	0.00465		5.61667	0.00465
338	0.0059		5.63333	0.0059
339	0.00527		5.65	0.00527
340	0.00192		5.66667	0.00192
341	-0.00131		5.68333	-0.00131
342	-0.00177		5.7	-0.00177
343	-0.00313		5.71667	-0.00313
344	-0.00216		5.73333	-0.00216
345	-0.000240124		5.75	-0.000240124
346	0.00128		5.76667	0.00128
347	0.00166		5.78333	0.00166
348	0.000278136		5.8	0.000278136
349	0.000980889		5.81667	0.000980889
350	0.0013		5.83333	0.0013
351	0.00317		5.85	0.00317
352	0.00474		5.86667	0.00474
353	0.00554		5.88333	0.00554
354	0.00357		5.9	0.00357
355	0.00209		5.91667	0.00209
356	0.00149		5.93333	0.00149
357	0.00325		5.95	0.00325
358	0.00325		5.96667	0.00325
359	0.00284		5.98333	0.00284
360	0.00229		6	0.00229
361	0.00186		6.01667	0.00186
362	0.00214		6.03333	0.00214
363	0.000999438		6.05	0.000999438
364	-0.000757809		6.06667	-0.000757809
365	-0.00153		6.08333	-0.00153
366	-0.00101		6.1	-0.00101
367	-0.00133		6.11667	-0.00133
368	-0.00154		6.13333	-0.00154
369	-0.00233		6.15	-0.00233
370	-0.00188		6.16667	-0.00188
371	-0.0016		6.18333	-0.0016
372	-0.00114		6.2	-0.00114
373	0.000666973		6.21667	0.000666973
374	0.00261		6.23333	0.00261
375	0.00246		6.25	0.00246
376	0.00141		6.26667	0.00141
377	0.00148		6.28333	0.00148
378	0.00148		6.3	0.00148
379	-0.0018		6.31667	-0.0018
380	-0.00398		6.33333	-0.00398
381	-0.000881		6.35	-0.000881
382	0.00881		6.36667	0.00881
383	0.01074		6.38333	0.01074
384	0.00752		6.4	0.00752
385	0.00202		6.41667	0.00202
386	0.00156		6.43333	0.00156
387	0.00276		6.45	0.00276
388	0.00286		6.46667	0.00286
389	0.00127		6.48333	0.00127
390	0.000377954		6.5	0.000377954
391	-4.4614e-05		6.51667	-4.4614e-05
392	0.00128		6.53333	0.00128
393	0.000350251		6.55	0.000350251
394	-0.00119		6.56667	-0.00119
395	-0.00348		6.58333	-0.00348
396	-0.00335		6.6	-0.00335
397	-0.00155		6.61667	-0.00155
398	0.000217412		6.63333	0.000217412
399	0.00321		6.65	0.00321
400	0.0042		6.66667	0.0042
401	0.0053		6.68333	0.0053
402	0.00396		6.7	0.00396
403	0.00231		6.71667	0.00231
404	0.00274		6.73333	0.00274
405	0.00199		6.75	0.00199
406	0.0033		6.76667	0.0033
407	-1.5697e-05		6.78333	-1.5697e-05
408	-0.000388265		6.8	-0.000388265
409	-0.00195		6.81667	-0.00195
410	-0.0001334		6.83333	-0.0001334
411	0.000384032		6.85	0.000384032
412	-0.000228535		6.86667	-0.000228535
413	-0.000171103		6.88333	-0.000171103
414	0.000626329		6.9	0.000626329
415	0.00142		6.91667	0.00142
416	0.00158		6.93333	0.00158
417	0.000308626		6.95	0.000308626
418	0.000746058		6.96667	0.000746058
419	-0.000926509		6.98333	-0.000926509
420	-0.00137		7	-0.00137
421	-0.00117		7.01667	-0.00117
422	0.0024		7.03333	0.0024
423	0.00507		7.05	0.00507
424	-0.000388887		7.06667	-0.000388887
425	-0.0094		7.08333	-0.0094
426	-0.02712		7.1	-0.02712
427	-0.04182		7.11667	-0.04182
428	-0.05028		7.13333	-0.05028
429	-0.04117		7.15	-0.04117
430	-0.02236		7.16667	-0.02236
431	-0.00301		7.18333	-0.00301
432	0.01162		7.2	0.01162
433	0.02121		7.21667	0.02121
434	0.02652		7.23333	0.02652
435	0.0255		7.25	0.0255
436	0.02071		7.26667	0.02071
437	0.0155		7.28333	0.0155
438	0.01291		7.3	0.01291
439	0.0129		7.31667	0.0129
440	0.0111		7.33333	0.0111
441	0.00815		7.35	0.00815
442	0.00539		7.36667	0.00539
443	0.00237		7.38333	0.00237
444	0.000171443		7.4	0.000171443
445	-0.00655		7.41667	-0.00655
446	-0.01108		7.43333	-0.01108
447	-0.01293		7.45	-0.01293
448	-0.00757		7.46667	-0.00757
449	-0.00292		7.48333	-0.00292
450	0.000392541		7.5	0.000392541
451	0.000201058		7.51667	0.000201058
452	0.00514		7.53333	0.00514
453	0.00312		7.55	0.00312
454	0.000606607		7.56667	0.000606607
455	-0.00514		7.58333	-0.00514
456	-0.00357		7.6	-0.00357
457	-0.00124		7.61667	-0.00124
458	-0.00269		7.63333	-0.00269
459	-0.00802		7.65	-0.00802
460	-0.01139		7.66667	-0.01139
461	-0.01111		7.68333	-0.01111
462	-0.0082		7.7	-0.0082
463	-0.00803		7.71667	-0.00803
464	-0.0093		7.73333	-0.0093
465	-0.01096		7.75	-0.01096
466	-0.01138		7.76667	-0.01138
467	-0.00895		7.78333	-0.00895
468	-0.00511		7.8	-0.00511
469	-0.000615646		7.81667	-0.000615646
470	0.00101		7.83333	0.00101
471	0.001		7.85	0.001
472	0.00111		7.86667	0.00111
473	-0.0013		7.88333	-0.0013
474	-0.00274		7.9	-0.00274
475	-0.00433		7.91667	-0.00433
476	-0.00441		7.93333	-0.00441
477	-0.00547		7.95	-0.00547
478	-0.00477		7.96667	-0.00477
479	-0.00378		7.98333	-0.00378
480	-0.000731965		8	-0.000731965
481	0.000336551		8.01667	0.000336551
482	0.00192		8.03333	0.00192
483	0.00225		8.05	0.00225
484	0.00411		8.06667	0.00411
485	0.00695		8.08333	0.00695
486	0.00895		8.1	0.00895
487	0.00862		8.11667	0.00862
488	0.00814		8.13333	0.00814
489	0.00704		8.15	0.00704
490	0.00442		8.16667	0.00442
491	0.00114		8.18333	0.00114
492	-0.00107		8.2	-0.00107
493	-0.00217		8.21667	-0.00217
494	-0.00165		8.23333	-0.00165
495	-0.000934218		8.25	-0.000934218
496	0.00251		8.26667	0.00251
497	0.00309		8.28333	0.00309
498	0.00218		8.3	0.00218
499	0.0011		8.31667	0.0011
500	-6.16358e-05		8.33333	-6.16358e-05
501	0.000756881		8.35	0.000756881
502	0.00157		8.36667	0.00157
503	0.00421		8.38333	0.00421
504	0.00505		8.4	0.00505
505	0.00317		8.41667	0.00317
506	-0.000690537		8.43333	-0.000690537
507	-0.0022		8.45	-0.0022
508	-0.00214		8.46667	-0.00214
509	-0.000104988		8.48333	-0.000104988
510	-6.64713e-05		8.5	-6.64713e-05
511	-0.00105		8.51667	-0.00105
512	-0.00161		8.53333	-0.00161
513	-4.09219e-05		8.55	-4.09219e-05
514	0.00125		8.56667	0.00125
515	-0.000193889		8.58333	-0.000193889
516	-0.00265		8.6	-0.00265
517	-0.00416		8.61667	-0.00416
518	-0.00367		8.63333	-0.00367
519	-0.00141		8.65	-0.00141
520	0.000728693		8.66667	0.000728693
521	0.00386		8.68333	0.00386
522	0.00301		8.7	0.00301
523	0.00193		8.71667	0.00193
524	-0.00126		8.73333	-0.00126
525	-0.00294		8.75	-0.00294
526	-0.00359		8.76667	-0.00359
527	-0.00251		8.78333	-0.00251
528	-0.00121		8.8	-0.00121
529	0.00132		8.81667	0.00132
530	0.00314		8.83333	0.00314
531	0.00434		8.85	0.00434
532	0.00428		8.86667	0.00428
533	0.00362		8.88333	0.00362
534	0.00268		8.9	0.00268
535	0.00033644		8.91667	0.00033644
536	-0.00144		8.93333	-0.00144
537	-0.00254		8.95	-0.00254
538	-0.00211		8.96667	-0.00211
539	-0.000369494		8.98333	-0.000369494
540	0.00155		9	0.00155
541	0.00108		9.01667	0.00108
542	-0.00175		9.03333	-0.00175
543	-0.00363		9.05	-0.00363
544	-0.00305		9.06667	-0.00305
545	-0.000308395		9.08333	-0.000308395
546	0.000790121		9.1	0.000790121
547	-0.000301362		9.11667	-0.000301362
548	-0.00229		9.13333	-0.00229
549	-0.0036		9.15	-0.0036
550	-0.00425		9.16667	-0.00425
551	-0.0054		9.18333	-0.0054
552	-0.00581		9.2	-0.00581
553	-0.00569		9.21667	-0.00569
554	-0.00422		9.23333	-0.00422
555	-0.00118		9.25	-0.00118
556	0.00241		9.26667	0.00241
557	0.00398		9.28333	0.00398
558	0.0035		9.3	0.0035
559	0.00245		9.31667	0.00245
560	0.00216		9.33333	0.00216
561	0.00193		9.35	0.00193
562	0.00203		9.36667	0.00203
563	0.00254		9.38333	0.00254
564	0.00243		9.4	0.00243
565	0.000389875		9.41667	0.000389875
566	-0.00209		9.43333	-0.00209
567	-0.00424		9.45	-0.00424
568	-0.00398		9.46667	-0.00398
569	-0.00221		9.48333	-0.00221
570	-0.000563485		9.5	-0.000563485
571	0.00142		9.51667	0.00142
572	0.000349171		9.53333	0.000349171
573	-0.000459501		9.55	-0.000459501
574	-0.00125		9.56667	-0.00125
575	0.000453155		9.58333	0.000453155
576	0.00114		9.6	0.00114
577	0.00133		9.61667	0.00133
578	0.00185		9.63333	0.00185
579	0.00246		9.65	0.00246
580	0.0017		9.66667	0.0017
581	-0.000218877		9.68333	-0.000218877
582	-0.00219		9.7	-0.00219
583	-0.00374		9.71667	-0.00374
584	-0.0018		9.73333	-0.0018
585	0.00201		9.75	0.00201
586	0.00479		9.76667	0.00479
587	0.00376		9.78333	0.00376
588	0.000700419		9.8	0.000700419
589	-0.00197		9.81667	-0.00197
590	-0.00251		9.83333	-0.00251
591	-0.00389		9.85	-0.00389
592	-0.00229		9.86667	-0.00229
593	-0.00279		9.88333	-0.00279
594	0.000841365		9.9	0.000841365
595	0.00279		9.91667	0.00279
596	0.0044		9.93333	0.0044
597	0.00081476		9.95	0.00081476
598	-0.00159		9.96667	-0.00159
599	-0.0014		9.98333	-0.0014
600	0.000878154		10	0.000878154
601	0.00152		10.0167	0.00152
602	0.0028		10.0333	0.0028
603	0.00448		10.05	0.00448
604	0.00486		10.0667	0.00486
605	-0.00192		10.0833	-0.00192
606	-0.01437		10.1	-0.01437
607	-0.02961		10.1167	-0.02961
608	-0.03804		10.1333	-0.03804
609	-0.03501		10.15	-0.03501
610	-0.02209		10.1667	-0.02209
611	-0.00627		10.1833	-0.00627
612	0.00392		10.2	0.00392
613	0.01056		10.2167	0.01056
614	0.01329		10.2333	0.01329
615	0.01727		10.25	0.01727
616	0.01989		10.2667	0.01989
617	0.02146		10.2833	0.02146
618	0.02094		10.3	0.02094
619	0.01837		10.3167	0.01837
620	0.01486		10.3333	0.01486
621	0.00975		10.35	0.00975
622	0.00462		10.3667	0.00462
623	-0.000599154		10.3833	-0.000599154
624	-0.00299		10.4	-0.00299
625	-0.00339		10.4167	-0.00339
626	-0.00252		10.4333	-0.00252
627	-3.12948e-05		10.45	-3.12948e-05
628	0.00176		10.4667	0.00176
629	0.00463		10.4833	0.00463
630	0.00667		10.5	0.00667
631	0.00636		10.5167	0.00636
632	0.00316		10.5333	0.00316
633	-0.00282		10.55	-0.00282
634	-0.00658		10.5667	-0.00658
635	-0.0105		10.5833	-0.0105
636	-0.00975		10.6	-0.00975
637	-0.00892		10.6167	-0.00892
638	-0.00735		10.6333	-0.00735
639	-0.00765		10.65	-0.00765
640	-0.01005		10.6667	-0.01005
641	-0.00892		10.6833	-0.00892
642	-0.00868		10.7	-0.00868
643	-0.00489		10.7167	-0.00489
644	-0.0024		10.7333	-0.0024
645	-0.00102		10.75	-0.00102
646	-0.00167		10.7667	-0.00167
647	-0.00291		10.7833	-0.00291
648	-0.00287		10.8	-0.00287
649	0.000617522		10.8167	0.000617522
650	0.00182		10.8333	0.00182
651	0.00248		10.85	0.00248
652	0.000283289		10.8667	0.000283289
653	-0.000591456		10.8833	-0.000591456
654	-9.62e-05		10.9	-9.62e-05
655	0.00139		10.9167	0.00139
656	0.00362		10.9333	0.00362
657	0.00515		10.95	0.00515
658	0.00387		10.9667	0.00387
659	0.00248		10.9833	0.00248
660	0.00268		11	0.00268
661	0.00304		11.0167	0.00304
662	0.00557		11.0333	0.00557
663	0.00535		11.05	0.00535
664	0.00555		11.0667	0.00555
665	0.00182		11.0833	0.00182
666	-0.000653133		11.1	-0.000653133
667	-0.00426		11.1167	-0.00426
668	-0.00697		11.1333	-0.00697
669	-0.00896		11.15	-0.00896
670	-0.00538		11.1667	-0.00538
671	-0.000276856		11.1833	-0.000276856
672	0.00387		11.2	0.00387
673	0.00486		11.2167	0.00486
674	0.00646		11.2333	0.00646
675	0.00705		11.25	0.00705
676	0.00712		11.2667	0.00712
677	0.00385		11.2833	0.00385
678	0.00132		11.3	0.00132
679	-0.000754811		11.3167	-0.000754811
680	-0.0017		11.3333	-0.0017
681	-0.00237		11.35	-0.00237
682	-0.00388		11.3667	-0.00388
683	-0.00215		11.3833	-0.00215
684	-0.00194		11.4	-0.00194
685	-0.000513278		11.4167	-0.000513278
686	-0.00115		11.4333	-0.00115
687	-0.000342767		11.45	-0.000342767
688	0.00145		11.4667	0.00145
689	0.00277		11.4833	0.00277
690	0.00159		11.5	0.00159
691	-0.000321744		11.5167	-0.000321744
692	-0.00453		11.5333	-0.00453
693	-0.00424		11.55	-0.00424
694	-0.00612		11.5667	-0.00612
695	-0.0038		11.5833	-0.0038
696	-0.00243		11.6	-0.00243
697	-0.000900211		11.6167	-0.000900211
698	0.000805044		11.6333	0.000805044
699	0.0001503		11.65	0.0001503
700	0.000995556		11.6667	0.000995556
701	-0.000549189		11.6833	-0.000549189
702	-1.39333e-05		11.7	-1.39333e-05
703	0.000461322		11.7167	0.000461322
704	0.00331		11.7333	0.00331
705	0.00378		11.75	0.00378
706	0.00223		11.7667	0.00223
707	-0.00226		11.7833	-0.00226
708	-0.0044		11.8	-0.0044
709	-0.00608		11.8167	-0.00608
710	-0.00542		11.8333	-0.00542
711	-0.00347		11.85	-0.00347
712	-8.13778e-05		11.8667	-8.13778e-05
713	0.00143		11.8833	0.00143
714	-0.00148		11.9	-0.00148
715	-0.00364		11.9167	-0.00364
716	-0.00431		11.9333	-0.00431
717	-0.00212		11.95	-0.00212
718	-0.00010866		11.9667	-0.00010866
719	0.000238102		11.9833	0.000238102
720	-5.13595e-06		12	-5.13595e-06
721	-0.000768374		12.0167	-0.000768374
722	-0.000891612		12.0333	-0.000891612
723	-0.000524849		12.05	-0.000524849
724	-0.000258087		12.0667	-0.000258087
725	0.00133		12.0833	0.00133
726	0.00442		12.1	0.00442
727	0.00505		12.1167	0.00505
728	0.00174		12.1333	0.00174
729	-0.00372		12.15	-0.00372
730	-0.00671		12.1667	-0.00671
731	-0.00534		12.1833	-0.00534
732	-0.00244		12.2	-0.00244
733	0.000372773		12.2167	0.000372773
734	0.000589535		12.2333	0.000589535
735	0.000386297		12.25	0.000386297
736	0.00055306		12.2667	0.00055306
737	-0.000370178		12.2833	-0.000370178
738	-0.000863416		12.3	-0.000863416
739	-0.00258		12.3167	-0.00258
740	-0.00179		12.3333	-0.00179
741	-0.00399		12.35	-0.00399
742	-0.00489		12.3667	-0.00489
743	-0.00373		12.3833	-0.00373
744	0.000987157		12.4	0.000987157
745	0.00343		12.4167	0.00343
746	0.0033		12.4333	0.0033
747	0.000547444		12.45	0.000547444
748	-0.000605794		12.4667	-0.000605794
749	-0.00175		12.4833	-0.00175
750	-0.00125		12.5	-0.00125
751	-0.000755507		12.5167	-0.000755507
752	0.0011		12.5333	0.0011
753	0.00185		12.55	0.00185
754	0.00275		12.5667	0.00275
755	-2.84584e-05		12.5833	-2.84584e-05
756	-0.00184		12.6	-0.00184
757	-0.0021		12.6167	-0.0021
758	0.000611828		12.6333	0.000611828
759	0.00309		12.65	0.00309
760	0.00352		12.6667	0.00352
761	0.00136		12.6833	0.00136
762	-0.000617301		12.7	-0.000617301
763	-0.000873331		12.7167	-0.000873331
764	0.000750639		12.7333	0.000750639
765	0.00296		12.75	0.00296
766	0.00283		12.7667	0.00283
767	0.000942549		12.7833	0.000942549
768	-0.000583481		12.8	-0.000583481
769	-0.00287		12.8167	-0.00287
770	-0.00187		12.8333	-0.00187
771	-0.000611571		12.85	-0.000611571
772	0.000812399		12.8667	0.000812399
773	0.000626368		12.8833	0.000626368
774	-0.00229		12.9	-0.00229
775	-0.00207		12.9167	-0.00207
776	-0.00502		12.9333	-0.00502
777	-0.00577		12.95	-0.00577
778	-0.00679		12.9667	-0.00679
779	-0.00596		12.9833	-0.00596
780	-0.00484		13	-0.00484
781	-0.00426		13.0167	-0.00426
782	-0.000407902		13.0333	-0.000407902
783	0.00523		13.05	0.00523
784	0.00956		13.0667	0.00956
785	0.00662		13.0833	0.00662
786	-0.00798		13.1	-0.00798
787	-0.02797		13.1167	-0.02797
788	-0.04137		13.1333	-0.04137
789	-0.04001		13.15	-0.04001
790	-0.02809		13.1667	-0.02809
791	-0.01242		13.1833	-0.01242
792	0.000931797		13.2	0.000931797
793	0.00923		13.2167	0.00923
794	0.01491		13.2333	0.01491
795	0.01791		13.25	0.01791
796	0.02033		13.2667	0.02033
797	0.02006		13.2833	0.02006
798	0.01771		13.3	0.01771
799	0.01543		13.3167	0.01543
800	0.01054		13.3333	0.01054
801	0.0062		13.35	0.0062
802	0.00375		13.3667	0.00375
803	0.00367		13.3833	0.00367
804	0.00267		13.4	0.00267
805	0.00153		13.4167	0.00153
806	0.00254		13.4333	0.00254
807	0.00601		13.45	0.00601
808	0.00616		13.4667	0.00616
809	0.00333		13.4833	0.00333
810	-0.00163		13.5	-0.00163
811	-0.00491		13.5167	-0.00491
812	-0.00605		13.5333	-0.00605
813	-0.00504		13.55	-0.00504
814	-0.00199		13.5667	-0.00199
815	-0.00161		13.5833	-0.00161
816	-0.00231		13.6	-0.00231
817	-0.00398		13.6167	-0.00398
818	-0.00384		13.6333	-0.00384
819	-0.00505		13.65	-0.00505
820	-0.00387		13.6667	-0.00387
821	-0.00337		13.6833	-0.00337
822	-0.00228		13.7	-0.00228
823	-0.00383		13.7167	-0.00383
824	-0.00522		13.7333	-0.00522
825	-0.00497		13.75	-0.00497
826	-0.00525		13.7667	-0.00525
827	-0.00566		13.7833	-0.00566
828	-0.00664		13.8	-0.00664
829	-0.00349		13.8167	-0.00349
830	-0.000671333		13.8333	-0.000671333
831	0.00153		13.85	0.00153
832	0.00246		13.8667	0.00246
833	0.00581		13.8833	0.00581
834	0.00746		13.9	0.00746
835	0.00662		13.9167	0.00662
836	0.00411		13.9333	0.00411
837	0.00238		13.95	0.00238
838	0.000968163		13.9667	0.000968163
839	0.00135		13.9833	0.00135
840	0.00702		14	0.00702
841	0.009		14.0167	0.009
842	0.00799		14.0333	0.00799
843	0.00405		14.05	0.00405
844	0.00367		14.0667	0.00367
845	0.00586		14.0833	0.00586
846	0.00629		14.1	0.00629
847	0.00618		14.1167	0.00618
848	0.00591		14.1333	0.00591
849	0.00452		14.15	0.00452
850	0.00424		14.1667	0.00424
851	0.0036		14.1833	0.0036
852	0.00532		14.2	0.00532
853	0.00627		14.2167	0.00627
854	0.00554		14.2333	0.00554
855	0.00297		14.25	0.00297
856	0.00311		14.2667	0.00311
857	0.00475		14.2833	0.00475
858	0.00665		14.3	0.00665
859	0.00728		14.3167	0.00728
860	0.00584		14.3333	0.00584
861	0.00525		14.35	0.00525
862	0.00345		14.3667	0.00345
863	0.00283		14.3833	0.00283
864	0.00205		14.4	0.00205
865	0.00176		14.4167	0.00176
866	0.000872461		14.4333	0.000872461
867	0.00010317		14.45	0.00010317
868	0.00117		14.4667	0.00117
869	0.00176		14.4833	0.00176
870	0.00175		14.5	0.00175
871	0.000366009		14.5167	0.000366009
872	0.000616718		14.5333	0.000616718
873	0.000207428		14.55	0.000207428
874	0.00184		14.5667	0.00184
875	0.00129		14.5833	0.00129
876	0.000219557		14.6	0.000219557
877	-0.000289734		14.6167	-0.000289734
878	0.00109		14.6333	0.00109
879	0.00341		14.65	0.00341
880	0.00404		14.6667	0.00404
881	0.00455		14.6833	0.00455
882	0.00695		14.7	0.00695
883	0.00874		14.7167	0.00874
884	0.00736		14.7333	0.00736
885	0.00557		14.75	0.00557
886	0.00489		14.7667	0.00489
887	0.0065		14.7833	0.0065
888	0.00598		14.8	0.00598
889	0.0026		14.8167	0.0026
890	0.00138		14.8333	0.00138
891	0.000409056		14.85	0.000409056
892	0.00223		14.8667	0.00223
893	0.00291		14.8833	0.00291
894	0.00158		14.9	0.00158
895	-0.000427478		14.9167	-0.000427478
896	-0.00134		14.9333	-0.00134
897	0.00114		14.95	0.00114
898	0.00309		14.9667	0.00309
899	0.00254		14.9833	0.00254
900	0.00298		15	0.00298
901	0.00111		15.0167	0.00111
902	0.00274		15.0333	0.00274
903	0.0033		15.05	0.0033
904	0.00559		15.0667	0.00559
905	0.00702		15.0833	0.00702
906	0.00863		15.1	0.00863
907	0.0104		15.1167	0.0104
908	0.00958		15.1333	0.00958
909	0.00785		15.15	0.00785
910	0.00223		15.1667	0.00223
911	-0.00328		15.1833	-0.00328
912	-0.00682		15.2	-0.00682
913	-0.00606		15.2167	-0.00606
914	-0.00393		15.2333	-0.00393
915	-0.00202		15.25	-0.00202
916	-0.00214		15.2667	-0.00214
917	-0.00224		15.2833	-0.00224
918	-0.00234		15.3	-0.00234
919	-0.00133		15.3167	-0.00133
920	-4.08158e-05		15.3333	-4.08158e-05
921	0.000595051		15.35	0.000595051
922	0.00108		15.3667	0.00108
923	0.00126		15.3833	0.00126
924	0.00046265		15.4	0.00046265
925	-0.000671483		15.4167	-0.000671483
926	-0.000325617		15.4333	-0.000325617
927	0.00020025		15.45	0.00020025
928	0.0013		15.4667	0.0013
929	-0.000291888		15.4833	-0.000291888
930	-0.00345		15.5	-0.00345
931	-0.00376		15.5167	-0.00376
932	-0.0044		15.5333	-0.0044
933	-0.00188		15.55	-0.00188
934	-0.00351		15.5667	-0.00351
935	-0.00166		15.5833	-0.00166
936	-0.00082765		15.6	-0.00082765
937	0.0024		15.6167	0.0024
938	0.00337		15.6333	0.00337
939	0.00331		15.65	0.00331
940	0.000934771		15.6667	0.000934771
941	-0.00168		15.6833	-0.00168
942	-0.0033		15.7	-0.0033
943	-0.00254		15.7167	-0.00254
944	-0.00266		15.7333	-0.00266
945	-0.00181		15.75	-0.00181
946	-0.00235		15.7667	-0.00235
947	0.000449009		15.7833	0.000449009
948	0.00129		15.8	0.00129
949	0.00194		15.8167	0.00194
950	0.00107		15.8333	0.00107
951	0.00068143		15.85	0.00068143
952	-0.00204		15.8667	-0.00204
953	-0.00378		15.8833	-0.00378
954	-0.00404		15.9	-0.00404
955	-0.00121		15.9167	-0.00121
956	0.00332		15.9333	0.00332
957	0.00546		15.95	0.00546
958	0.00743		15.9667	0.00743
959	0.00463		15.9833	0.00463
960	0.0032		16	0.0032
961	0.000577483		16.0167	0.000577483
962	0.00182		16.0333	0.00182
963	0.00564		16.05	0.00564
964	0.00898		16.0667	0.00898
965	0.00514		16.0833	0.00514
966	-0.0107		16.1	-0.0107
967	-0.0282		16.1167	-0.0282
968	-0.0387		16.1333	-0.0387
969	-0.0353		16.15	-0.0353
970	-0.02321		16.1667	-0.02321
971	-0.00835		16.1833	-0.00835
972	0.00355		16.2	0.00355
973	0.01063		16.2167	0.01063
974	0.01444		16.2333	0.01444
975	0.01779		16.25	0.01779
976	0.02075		16.2667	0.02075
977	0.02035		16.2833	0.02035
978	0.01773		16.3	0.01773
979	0.01372		16.3167	0.01372
980	0.00907		16.3333	0.00907
981	0.00466		16.35	0.00466
982	-0.00123		16.3667	-0.00123
983	-0.0044		16.3833	-0.0044
984	-0.00791		16.4	-0.00791
985	-0.00988		16.4167	-0.00988
986	-0.0095		16.4333	-0.0095
987	-0.00568		16.45	-0.00568
988	-0.000371037		16.4667	-0.000371037
989	0.00165		16.4833	0.00165
990	0.00197		16.5	0.00197
991	0.00212		16.5167	0.00212
992	0.00203		16.5333	0.00203
993	-0.000227969		16.55	-0.000227969
994	-0.00284		16.5667	-0.00284
995	-0.00577		16.5833	-0.00577
996	-0.00779		16.6	-0.00779
997	-0.00914		16.6167	-0.00914
998	-0.00952		16.6333	-0.00952
999	-0.00948		16.65	-0.00948
1000	-0.0089		16.6667	-0.0089
1001	-0.00923		16.6833	-0.00923
1002	-0.00774		16.7	-0.00774
1003	-0.00577		16.7167	-0.00577
1004	-0.00218		16.7333	-0.00218
1005	-0.000204606		16.75	-0.000204606
1006	0.000644008		16.7667	0.000644008
1007	-9.73785e-05		16.7833	-9.73785e-05
1008	-0.00238		16.8	-0.00238
1009	-0.00455		16.8167	-0.00455
1010	-0.00398		16.8333	-0.00398
1011	-0.00283		16.85	-0.00283
1012	-0.00133		16.8667	-0.00133
1013	-0.000682049		16.8833	-0.000682049
1014	-0.00213		16.9	-0.00213
1015	-0.00255		16.9167	-0.00255
1016	-0.002		16.9333	-0.002
1017	0.000551466		16.95	0.000551466
1018	0.00192		16.9667	0.00192
1019	0.00198		16.9833	0.00198
1020	0.0025		17	0.0025
1021	0.00296		17.0167	0.00296
1022	0.000803361		17.0333	0.000803361
1023	-0.00105		17.05	-0.00105
1024	-0.00305		17.0667	-0.00305
1025	-0.0018		17.0833	-0.0018
1026	-0.000123123		17.1	-0.000123123
1027	0.00153		17.1167	0.00153
1028	0.00301		17.1333	0.00301
1029	0.00392		17.15	0.00392
1030	0.00293		17.1667	0.00293
1031	0.00262		17.1833	0.00262
1032	0.00236		17.2	0.00236
1033	0.00264		17.2167	0.00264
1034	0.00118		17.2333	0.00118
1035	-0.00107		17.25	-0.00107
1036	-0.000659334		17.2667	-0.000659334
1037	-0.000370955		17.2833	-0.000370955
1038	0.00105		17.3	0.00105
1039	0.00127		17.3167	0.00127
1040	0.000854182		17.3333	0.000854182
1041	-0.000807439		17.35	-0.000807439
1042	-0.00155		17.3667	-0.00155
1043	0.000789319		17.3833	0.000789319
1044	0.00347		17.4	0.00347
1045	0.00292		17.4167	0.00292
1046	0.00188		17.4333	0.00188
1047	0.00205		17.45	0.00205
1048	0.00368		17.4667	0.00368
1049	0.00331		17.4833	0.00331
1050	0.00144		17.5	0.00144
1051	-0.00103		17.5167	-0.00103
1052	-0.00445		17.5333	-0.00445
1053	-0.00587		17.55	-0.00587
1054	-0.00579		17.5667	-0.00579
1055	-0.00455		17.5833	-0.00455
1056	-0.00244		17.6	-0.00244
1057	-0.00122		17.6167	-0.00122
1058	0.00159		17.6333	0.00159
1059	-0.000901893		17.65	-0.000901893
1060	-0.00219		17.6667	-0.00219
1061	-0.00414		17.6833	-0.00414
1062	-0.00229		17.7	-0.00229
1063	-0.00207		17.7167	-0.00207
1064	-0.00144		17.7333	-0.00144
1065	-0.00115		17.75	-0.00115
1066	-0.000428612		17.7667	-0.000428612
1067	-0.00264		17.7833	-0.00264
1068	-0.00435		17.8	-0.00435
1069	-0.00541		17.8167	-0.00541
1070	-0.00326		17.8333	-0.00326
1071	-0.00289		17.85	-0.00289
1072	-0.00117		17.8667	-0.00117
1073	-0.000605331		17.8833	-0.000605331
1074	0.00425		17.9	0.00425
1075	0.00539		17.9167	0.00539
1076	0.00447		17.9333	0.00447
1077	0.000353687		17.95	0.000353687
1078	0.000188441		17.9667	0.000188441
1079	-0.000356804		17.9833	-0.000356804
1080	-0.00119		18	-0.00119
1081	-0.0034		18.0167	-0.0034
1082	-0.00375		18.0333	-0.00375
1083	-0.00247		18.05	-0.00247
1084	-0.000573032		18.0667	-0.000573032
1085	-0.000168278		18.0833	-0.000168278
1086	-0.000693523		18.1	-0.000693523
1087	-0.00158		18.1167	-0.00158
1088	0.00126		18.1333	0.00126
1089	0.00417		18.15	0.00417
1090	0.00568		18.1667	0.00568
1091	0.00303		18.1833	0.00303
1092	0.00237		18.2	0.00237
1093	0.00126		18.2167	0.00126
1094	0.00136		18.2333	0.00136
1095	-0.000390733		18.25	-0.000390733
1096	-0.00235		18.2667	-0.00235
1097	-0.00269		18.2833	-0.00269
1098	-0.00528		18.3	-0.00528
1099	-0.00524		18.3167	-0.00524
1100	-0.00454		18.3333	-0.00454
1101	-0.00036366		18.35	-0.00036366
1102	0.00429		18.3667	0.00429
1103	0.00693		18.3833	0.00693
1104	0.00794		18.4	0.00794
1105	0.00788		18.4167	0.00788
1106	0.00684		18.4333	0.00684
1107	0.0045		18.45	0.0045
1108	0.00268		18.4667	0.00268
1109	0.00179		18.4833	0.00179
1110	0.00309		18.5	0.00309
1111	0.00231		18.5167	0.00231
1112	0.00284		18.5333	0.00284
1113	0.00189		18.55	0.00189
1114	0.00127		18.5667	0.00127
1115	0.000657674		18.5833	0.000657674
1116	-0.00101		18.6	-0.00101
1117	-0.00127		18.6167	-0.00127
1118	-0.000125611		18.6333	-0.000125611
1119	0.000636627		18.65	0.000636627
1120	0.000248865		18.6667	0.000248865
1121	5.11029e-05		18.6833	5.11029e-05
1122	0.00212		18.7	0.00212
1123	0.00438		18.7167	0.00438
1124	0.00183		18.7333	0.00183
1125	-0.00104		18.75	-0.00104
1126	-0.00338		18.7667	-0.00338
1127	-0.00251		18.7833	-0.00251
1128	-0.00101		18.8	-0.00101
1129	-0.000570992		18.8167	-0.000570992
1130	-0.000448754		18.8333	-0.000448754
1131	-0.00182		18.85	-0.00182
1132	-0.00167		18.8667	-0.00167
1133	-0.00090204		18.8833	-0.00090204
1134	0.000640199		18.9	0.000640199
1135	0.00364		18.9167	0.00364
1136	0.00534		18.9333	0.00534
1137	0.00394		18.95	0.00394
1138	0.000999151		18.9667	0.000999151
1139	-0.00069466		18.9833	-0.00069466
1140	-0.000516685		19	-0.000516685
1141	-0.00119		19.0167	-0.00119
1142	-0.000560735		19.0333	-0.000560735
1143	0.00237		19.05	0.00237
1144	0.00505		19.0667	0.00505
1145	0.00315		19.0833	0.00315
1146	-0.00489		19.1	-0.00489
1147	-0.02064		19.1167	-0.02064
1148	-0.0343		19.1333	-0.0343
1149	-0.03907		19.15	-0.03907
1150	-0.02755		19.1667	-0.02755
1151	-0.01112		19.1833	-0.01112
1152	0.00476		19.2	0.00476
1153	0.01362		19.2167	0.01362
1154	0.01635		19.2333	0.01635
1155	0.01659		19.25	0.01659
1156	0.01674		19.2667	0.01674
1157	0.01839		19.2833	0.01839
1158	0.01744		19.3	0.01744
1159	0.01363		19.3167	0.01363
1160	0.00669		19.3333	0.00669
1161	0.00157		19.35	0.00157
1162	-0.0023		19.3667	-0.0023
1163	-0.00349		19.3833	-0.00349
1164	-0.00535		19.4	-0.00535
1165	-0.00619		19.4167	-0.00619
1166	-0.00616		19.4333	-0.00616
1167	-0.00411		19.45	-0.00411
1168	-0.00219		19.4667	-0.00219
1169	-0.000535416		19.4833	-0.000535416
1170	-0.000437441		19.5	-0.000437441
1171	-0.00121		19.5167	-0.00121
1172	-0.000341491		19.5333	-0.000341491
1173	0.00115		19.55	0.00115
1174	0.000154459		19.5667	0.000154459
1175	-0.0044		19.5833	-0.0044
1176	-0.00841		19.6	-0.00841
1177	-0.00629		19.6167	-0.00629
1178	-0.00383		19.6333	-0.00383
1179	-0.00222		19.65	-0.00222
1180	-0.00347		19.6667	-0.00347
1181	-0.00268		19.6833	-0.00268
1182	-0.00128		19.7	-0.00128
1183	-0.00205		19.7167	-0.00205
1184	-0.00321		19.7333	-0.00321
1185	-0.00448		19.75	-0.00448
1186	-0.00356		19.7667	-0.00356
1187	-0.00152		19.7833	-0.00152
1188	-0.000504922		19.8	-0.000504922
1189	0.000656677		19.8167	0.000656677
1190	0.00182		19.8333	0.00182
1191	0.00177		19.85	0.00177
1192	0.000291475		19.8667	0.000291475
1193	-0.000436926		19.8833	-0.000436926
1194	-0.000685326		19.9	-0.000685326
1195	-0.00119		19.9167	-0.00119
1196	-0.00118		19.9333	-0.00118
1197	0.000269472		19.95	0.000269472
1198	0.00168		19.9667	0.00168
1199	-0.00098733		19.9833	-0.00098733
1200	-0.00132		20	-0.00132
1201	-0.000924131		20.0167	-0.000924131
1202	0.00364		20.0333	0.00364
1203	0.00337		20.05	0.00337
1204	0.0041		20.0667	0.0041
1205	0.00169		20.0833	0.00169
1206	0.00259		20.1	0.00259
1207	0.00187		20.1167	0.00187
1208	0.00244		20.1333	0.00244
1209	0.00278		20.15	0.00278
1210	0.00412		20.1667	0.00412
1211	0.00508		20.1833	0.00508
1212	0.00525		20.2	0.00525
1213	0.00621		20.2167	0.00621
1214	0.00661		20.2333	0.00661
1215	0.007		20.25	0.007
1216	0.00665		20.2667	0.00665
1217	0.00521		20.2833	0.00521
1218	0.00472		20.3	0.00472
1219	0.00572		20.3167	0.00572
1220	0.00658		20.3333	0.00658
1221	0.00898		20.35	0.00898
1222	0.00865		20.3667	0.00865
1223	0.00741		20.3833	0.00741
1224	0.00455		20.4	0.00455
1225	0.00599		20.4167	0.00599
1226	0.01067		20.4333	0.01067
1227	0.01208		20.45	0.01208
1228	0.00851		20.4667	0.00851
1229	0.00298		20.4833	0.00298
1230	-0.00149		20.5	-0.00149
1231	-0.00417		20.5167	-0.00417
1232	-0.00515		20.5333	-0.00515
1233	-0.00335		20.55	-0.00335
1234	0.00038703		20.5667	0.00038703
1235	0.00232		20.5833	0.00232
1236	0.00394		20.6	0.00394
1237	0.002		20.6167	0.002
1238	0.00201		20.6333	0.00201
1239	0.00126		20.65	0.00126
1240	0.00277		20.6667	0.00277
1241	0.00269		20.6833	0.00269
1242	0.00377		20.7	0.00377
1243	0.00237		20.7167	0.00237
1244	0.000908655		20.7333	0.000908655
1245	-0.0012		20.75	-0.0012
1246	-0.00235		20.7667	-0.00235
1247	-0.0029		20.7833	-0.0029
1248	-0.00561		20.8	-0.00561
1249	-0.00548		20.8167	-0.00548
1250	-0.00588		20.8333	-0.00588
1251	-0.00574		20.85	-0.00574
1252	-0.00797		20.8667	-0.00797
1253	-0.00978		20.8833	-0.00978
1254	-0.01032		20.9	-0.01032
1255	-0.00976		20.9167	-0.00976
1256	-0.00882		20.9333	-0.00882
1257	-0.00798		20.95	-0.00798
1258	-0.00724		20.9667	-0.00724
1259	-0.0076		20.9833	-0.0076
1260	-0.00867		21	-0.00867
1261	-0.0121		21.0167	-0.0121
1262	-0.01248		21.0333	-0.01248
1263	-0.01153		21.05	-0.01153
1264	-0.00663		21.0667	-0.00663
1265	-0.00424		21.0833	-0.00424
1266	-0.00342		21.1	-0.00342
1267	-0.00348		21.1167	-0.00348
1268	-0.00272		21.1333	-0.00272
1269	-0.00346		21.15	-0.00346
1270	-0.00685		21.1667	-0.00685
1271	-0.0099		21.1833	-0.0099
1272	-0.0113		21.2	-0.0113
1273	-0.01086		21.2167	-0.01086
1274	-0.01031		21.2333	-0.01031
1275	-0.00668		21.25	-0.00668
1276	-0.00298		21.2667	-0.00298
1277	-0.000851039		21.2833	-0.000851039
1278	-0.00376		21.3	-0.00376
1279	-0.00637		21.3167	-0.00637
1280	-0.00754		21.3333	-0.00754
1281	-0.00714		21.35	-0.00714
1282	-0.00684		21.3667	-0.00684
1283	-0.00559		21.3833	-0.00559
1284	-0.00498		21.4	-0.00498
1285	-0.00599		21.4167	-0.00599
1286	-0.00941		21.4333	-0.00941
1287	-0.00776		21.45	-0.00776
1288	-0.00404		21.4667	-0.00404
1289	0.000435427		21.4833	0.000435427
1290	0.000542632		21.5	0.000542632
1291	-0.000620162		21.5167	-0.000620162
1292	-0.00269		21.5333	-0.00269
1293	-0.00486		21.55	-0.00486
1294	-0.00572		21.5667	-0.00572
1295	-0.00338		21.5833	-0.00338
1296	-0.000984135		21.6	-0.000984135
1297	0.00103		21.6167	0.00103
1298	0.00142		21.6333	0.00142
1299	0.00232		21.65	0.00232
1300	0.0017		21.6667	0.0017
1301	0.00194		21.6833	0.00194
1302	0.00162		21.7	0.00162
1303	0.00123		21.7167	0.00123
1304	6.35093e-05		21.7333	6.35093e-05
1305	-0.00128		21.75	-0.00128
1306	-0.00253		21.7667	-0.00253
1307	-0.000954278		21.7833	-0.000954278
1308	0.00109		21.8	0.00109
1309	0.00557		21.8167	0.00557
1310	0.00542		21.8333	0.00542
1311	0.00315		21.85	0.00315
1312	-0.000254594		21.8667	-0.000254594
1313	-0.00123		21.8833	-0.00123
1314	0.00359		21.9	0.00359
1315	0.00711		21.9167	0.00711
1316	0.0087		21.9333	0.0087
1317	0.00729		21.95	0.00729
1318	0.00424		21.9667	0.00424
1319	0.0025		21.9833	0.0025
1320	0.000284901		22	0.000284901
1321	-0.000225163		22.0167	-0.000225163
1322	-0.00235		22.0333	-0.00235
1323	0.00141		22.05	0.00141
1324	0.00717		22.0667	0.00717
1325	0.01227		22.0833	0.01227
1326	0.00439		22.1	0.00439
1327	-0.01184		22.1167	-0.01184
1328	-0.03003		22.1333	-0.03003
1329	-0.03752		22.15	-0.03752
1330	-0.03297		22.1667	-0.03297
1331	-0.01894		22.1833	-0.01894
1332	-0.00518		22.2	-0.00518
1333	0.00768		22.2167	0.00768
1334	0.01305		22.2333	0.01305
1335	0.01636		22.25	0.01636
1336	0.01784		22.2667	0.01784
1337	0.0193		22.2833	0.0193
1338	0.01799		22.3	0.01799
1339	0.01543		22.3167	0.01543
1340	0.0137		22.3333	0.0137
1341	0.01269		22.35	0.01269
1342	0.0078		22.3667	0.0078
1343	0.00267		22.3833	0.00267
1344	-0.00136		22.4	-0.00136
1345	-0.00268		22.4167	-0.00268
1346	-0.00107		22.4333	-0.00107
1347	0.000543194		22.45	0.000543194
1348	0.000683131		22.4667	0.000683131
1349	-0.00373		22.4833	-0.00373
1350	-0.00583		22.5	-0.00583
1351	-0.00649		22.5167	-0.00649
1352	-0.003		22.5333	-0.003
1353	-0.0031		22.55	-0.0031
1354	-0.00505		22.5667	-0.00505
1355	-0.0061		22.5833	-0.0061
1356	-0.00544		22.6	-0.00544
1357	-0.00363		22.6167	-0.00363
1358	-0.00413		22.6333	-0.00413
1359	-0.00365		22.65	-0.00365
1360	-0.00423		22.6667	-0.00423
1361	-0.00327		22.6833	-0.00327
1362	-0.00362		22.7	-0.00362
1363	-0.00509		22.7167	-0.00509
1364	-0.00704		22.7333	-0.00704
1365	-0.00992		22.75	-0.00992
1366	-0.0084		22.7667	-0.0084
1367	-0.00746		22.7833	-0.00746
1368	-0.00387		22.8	-0.00387
1369	-0.000942087		22.8167	-0.000942087
1370	-0.000202167		22.8333	-0.000202167
1371	-0.000362246		22.85	-0.000362246
1372	-0.000232326		22.8667	-0.000232326
1373	0.000247595		22.8833	0.000247595
1374	-0.00135		22.9	-0.00135
1375	-0.00369		22.9167	-0.00369
1376	-0.00352		22.9333	-0.00352
1377	0.0012		22.95	0.0012
1378	0.00439		22.9667	0.00439
1379	0.00618		22.9833	0.00618
1380	0.00546		23	0.00546
1381	0.00554		23.0167	0.00554
1382	0.00437		23.0333	0.00437
1383	0.00281		23.05	0.00281
1384	0.00133		23.0667	0.00133
1385	-0.000323359		23.0833	-0.000323359
1386	-0.00199		23.1	-0.00199
1387	-0.00301		23.1167	-0.00301
1388	-0.00253		23.1333	-0.00253
1389	-0.000883676		23.15	-0.000883676
1390	0.00142		23.1667	0.00142
1391	0.0047		23.1833	0.0047
1392	0.00861		23.2	0.00861
1393	0.00975		23.2167	0.00975
1394	0.00783		23.2333	0.00783
1395	0.00367		23.25	0.00367
1396	-0.000321156		23.2667	-0.000321156
1397	0.000180922		23.2833	0.000180922
1398	-0.000207001		23.3	-0.000207001
1399	0.00161		23.3167	0.00161
1400	0.00371		23.3333	0.00371
1401	0.00615		23.35	0.00615
1402	0.00644		23.3667	0.00644
1403	0.00379		23.3833	0.00379
1404	0.00134		23.4	0.00134
1405	0.000387542		23.4167	0.000387542
1406	0.000709619		23.4333	0.000709619
1407	0.00159		23.45	0.00159
1408	0.00434		23.4667	0.00434
1409	0.00412		23.4833	0.00412
1410	0.00376		23.5	0.00376
1411	0.000350007		23.5167	0.000350007
1412	-0.00183		23.5333	-0.00183
1413	-0.00495		23.55	-0.00495
1414	-0.00618		23.5667	-0.00618
1415	-0.00558		23.5833	-0.00558
1416	-0.004		23.6	-0.004
1417	-0.0016		23.6167	-0.0016
1418	-0.00223		23.6333	-0.00223
1419	-0.00177		23.65	-0.00177
1420	-0.000541295		23.6667	-0.000541295
1421	0.0027		23.6833	0.0027
1422	0.00431		23.7	0.00431
1423	0.00312		23.7167	0.00312
1424	0.00206		23.7333	0.00206
1425	0.00127		23.75	0.00127
1426	0.00071117		23.7667	0.00071117
1427	0.000833247		23.7833	0.000833247
1428	0.000675325		23.8	0.000675325
1429	-0.000192598		23.8167	-0.000192598
1430	-0.00075052		23.8333	-0.00075052
1431	-0.000528443		23.85	-0.000528443
1432	0.00103		23.8667	0.00103
1433	-0.000303272		23.8833	-0.000303272
1434	-0.00244		23.9	-0.00244
1435	-0.00502		23.9167	-0.00502
1436	-0.00473		23.9333	-0.00473
1437	-0.00295		23.95	-0.00295
1438	-0.00030247		23.9667	-0.00030247
1439	0.00131		23.9833	0.00131
1440	0.00227		24	0.00227
1441	0.00231		24.0167	0.00231
1442	0.00391		24.0333	0.00391
1443	0.00567		24.05	0.00567
1444	0.00578		24.0667	0.00578
1445	0.00541		24.0833	0.00541
1446	0.00413		24.1	0.00413
1447	0.00345		24.1167	0.00345
1448	0.00268		24.1333	0.00268
1449	0.0023		24.15	0.0023
1450	0.00269		24.1667	0.00269
1451	0.00223		24.1833	0.00223
1452	0.00333		24.2	0.00333
1453	0.00175		24.2167	0.00175
1454	-0.000545903		24.2333	-0.000545903
1455	-0.00398		24.25	-0.00398
1456	-0.00111		24.2667	-0.00111
1457	0.00326		24.2833	0.00326
1458	0.0059		24.3	0.0059
1459	0.0062		24.3167	0.0062
1460	0.00536		24.3333	0.00536
1461	0.00518		24.35	0.00518
1462	0.00369		24.3667	0.00369
1463	0.00274		24.3833	0.00274
1464	0.000855701		24.4	0.000855701
1465	0.00149		24.4167	0.00149
1466	0.00178		24.4333	0.00178
1467	0.00448		24.45	0.00448
1468	0.00465		24.4667	0.00465
1469	0.0044		24.4833	0.0044
1470	0.00216		24.5	0.00216
1471	-0.00158		24.5167	-0.00158
1472	-0.00483		24.5333	-0.00483
1473	-0.00783		24.55	-0.00783
1474	-0.00506		24.5667	-0.00506
1475	-0.00221		24.5833	-0.00221
1476	0.000736365		24.6	0.000736365
1477	0.000890342		24.6167	0.000890342
1478	0.00086432		24.6333	0.00086432
1479	0.000608297		24.65	0.000608297
1480	0.00102		24.6667	0.00102
1481	0.00257		24.6833	0.00257
1482	0.00366		24.7	0.00366
1483	0.00123		24.7167	0.00123
1484	-0.00267		24.7333	-0.00267
1485	-0.00466		24.75	-0.00466
1486	-0.0051		24.7667	-0.0051
1487	-0.00425		24.7833	-0.00425
1488	-0.00289		24.8	-0.00289
1489	9.80711e-05		24.8167	9.80711e-05
1490	0.00183		24.8333	0.00183
1491	0.00414		24.85	0.00414
1492	0.00539		24.8667	0.00539
1493	0.00648		24.8833	0.00648
1494	0.00434		24.9	0.00434
1495	0.00416		24.9167	0.00416
1496	0.00353		24.9333	0.00353
1497	0.00254		24.95	0.00254
1498	-6.13231e-06		24.9667	-6.13231e-06
1499	-0.00114		24.9833	-0.00114
1500	-0.00128		25	-0.00128
1501	-0.00153		25.0167	-0.00153
1502	-0.000420223		25.0333	-0.000420223
1503	0.00417		25.05	0.00417
1504	0.00946		25.0667	0.00946
1505	0.00864		25.0833	0.00864
1506	0.000715687		25.1	0.000715687
1507	-0.01664		25.1167	-0.01664
1508	-0.03389		25.1333	-0.03389
1509	-0.0437		25.15	-0.0437
1510	-0.0389		25.1667	-0.0389
1511	-0.02469		25.1833	-0.02469
1512	-0.00977		25.2	-0.00977
1513	0.00125		25.2167	0.00125
1514	0.00842		25.2333	0.00842
1515	0.01346		25.25	0.01346
1516	0.01652		25.2667	0.01652
1517	0.01571		25.2833	0.01571
1518	0.01688		25.3	0.01688
1519	0.01477		25.3167	0.01477
1520	0.01425		25.3333	0.01425
1521	0.00789		25.35	0.00789
1522	0.0034		25.3667	0.0034
1523	0.000868939		25.3833	0.000868939
1524	-0.00212		25.4	-0.00212
1525	-0.00353		25.4167	-0.00353
1526	-0.00473		25.4333	-0.00473
1527	-0.00333		25.45	-0.00333
1528	-0.00185		25.4667	-0.00185
1529	-0.00148		25.4833	-0.00148
1530	-0.00129		25.5	-0.00129
1531	-0.00192		25.5167	-0.00192
1532	-0.00303		25.5333	-0.00303
1533	-0.00591		25.55	-0.00591
1534	-0.00876		25.5667	-0.00876
1535	-0.01048		25.5833	-0.01048
1536	-0.0095		25.6	-0.0095
1537	-0.01039		25.6167	-0.01039
1538	-0.01001		25.6333	-0.01001
1539	-0.00966		25.65	-0.00966
1540	-0.00851		25.6667	-0.00851
1541	-0.00918		25.6833	-0.00918
1542	-0.01191		25.7	-0.01191
1543	-0.01165		25.7167	-0.01165
1544	-0.01058		25.7333	-0.01058
1545	-0.00726		25.75	-0.00726
1546	-0.00467		25.7667	-0.00467
1547	-0.00362		25.7833	-0.00362
1548	-0.00292		25.8	-0.00292
1549	-0.00286		25.8167	-0.00286
1550	-0.00243		25.8333	-0.00243
1551	-0.0026		25.85	-0.0026
1552	-0.00198		25.8667	-0.00198
1553	-0.00106		25.8833	-0.00106
1554	0.00298		25.9	0.00298
1555	0.00594		25.9167	0.00594
1556	0.01005		25.9333	0.01005
1557	0.00997		25.95	0.00997
1558	0.00848		25.9667	0.00848
1559	0.00662		25.9833	0.00662
1560	0.00612		26	0.00612
1561	0.00463		26.0167	0.00463
1562	0.00307		26.0333	0.00307
1563	0.00105		26.05	0.00105
1564	-0.00111		26.0667	-0.00111
1565	-0.00285		26.0833	-0.00285
1566	-0.00321		26.1	-0.00321
1567	-0.00316		26.1167	-0.00316
1568	-0.00169		26.1333	-0.00169
1569	-0.00141		26.15	-0.00141
1570	0.00131		26.1667	0.00131
1571	0.00127		26.1833	0.00127
1572	0.00159		26.2	0.00159
1573	0.00132		26.2167	0.00132
1574	0.00191		26.2333	0.00191
1575	-0.000683982		26.25	-0.000683982
1576	-0.00298		26.2667	-0.00298
1577	-0.00581		26.2833	-0.00581
1578	-0.00545		26.3	-0.00545
1579	-0.00511		26.3167	-0.00511
1580	-0.00377		26.3333	-0.00377
1581	-0.000649729		26.35	-0.000649729
1582	0.00321		26.3667	0.00321
1583	0.00607		26.3833	0.00607
1584	0.00607		26.4	0.00607
1585	0.0026		26.4167	0.0026
1586	-0.00235		26.4333	-0.00235
1587	-0.00466		26.45	-0.00466
1588	-0.00223		26.4667	-0.00223
1589	-0.000764059		26.4833	-0.000764059
1590	-0.00031835		26.5	-0.00031835
1591	-0.00217		26.5167	-0.00217
1592	-0.000926932		26.5333	-0.000926932
1593	-0.000811224		26.55	-0.000811224
1594	-0.000635515		26.5667	-0.000635515
1595	0.000250194		26.5833	0.000250194
1596	0.00272		26.6	0.00272
1597	0.00389		26.6167	0.00389
1598	0.00119		26.6333	0.00119
1599	-0.000956971		26.65	-0.000956971
1600	-0.00279		26.6667	-0.00279
1601	-0.00388		26.6833	-0.00388
1602	-0.00387		26.7	-0.00387
1603	-0.00298		26.7167	-0.00298
1604	-0.00218		26.7333	-0.00218
1605	-0.00385		26.75	-0.00385
1606	-0.00352		26.7667	-0.00352
1607	-0.00086301		26.7833	-0.00086301
1608	0.00323		26.8	0.00323
1609	0.0028		26.8167	0.0028
1610	0.000161871		26.8333	0.000161871
1611	-0.00443		26.85	-0.00443
1612	-0.00572		26.8667	-0.00572
1613	-0.00337		26.8833	-0.00337
1614	-0.000558288		26.9	-0.000558288
1615	0.000276672		26.9167	0.000276672
1616	-0.000268368		26.9333	-0.000268368
1617	-0.000713407		26.95	-0.000713407
1618	-0.000328447		26.9667	-0.000328447
1619	-0.00206		26.9833	-0.00206
1620	-0.00333		27	-0.00333
1621	-0.004		27.0167	-0.004
1622	-0.00439		27.0333	-0.00439
1623	-0.00308		27.05	-0.00308
1624	-0.00248		27.0667	-0.00248
1625	-0.00105		27.0833	-0.00105
1626	-0.00249		27.1	-0.00249
1627	-0.00189		27.1167	-0.00189
1628	0.000161156		27.1333	0.000161156
1629	0.00359		27.15	0.00359
1630	0.00474		27.1667	0.00474
1631	0.00409		27.1833	0.00409
1632	0.00216		27.2	0.00216
1633	0.000775957		27.2167	0.000775957
1634	-0.000979083		27.2333	-0.000979083
1635	-0.00139		27.25	-0.00139
1636	-0.00201		27.2667	-0.00201
1637	-0.00204		27.2833	-0.00204
1638	-0.00175		27.3	-0.00175
1639	0.000395718		27.3167	0.000395718
1640	0.00249		27.3333	0.00249
1641	0.0028		27.35	0.0028
1642	0.00163		27.3667	0.00163
1643	0.00205		27.3833	0.00205
1644	0.00276		27.4	0.00276
1645	0.00316		27.4167	0.00316
1646	0.00157		27.4333	0.00157
1647	-0.000938992		27.45	-0.000938992
1648	-0.00348		27.4667	-0.00348
1649	-0.00493		27.4833	-0.00493
1650	-0.00346		27.5	-0.00346
1651	-0.00269		27.5167	-0.00269
1652	-0.00263		27.5333	-0.00263
1653	-0.0024		27.55	-0.0024
1654	0.000221402		27.5667	0.000221402
1655	0.00433		27.5833	0.00433
1656	0.00709		27.6	0.00709
1657	0.00701		27.6167	0.00701
1658	0.0053		27.6333	0.0053
1659	0.00233		27.65	0.00233
1660	2.74547e-05		27.6667	2.74547e-05
1661	-0.000668203		27.6833	-0.000668203
1662	-0.00104		27.7	-0.00104
1663	-9.95191e-05		27.7167	-9.95191e-05
1664	0.000594823		27.7333	0.000594823
1665	0.002		27.75	0.002
1666	0.00276		27.7667	0.00276
1667	0.00161		27.7833	0.00161
1668	0.00157		27.8	0.00157
1669	0.00121		27.8167	0.00121
1670	0.00249		27.8333	0.00249
1671	0.00225		27.85	0.00225
1672	0.00229		27.8667	0.00229
1673	0.00223		27.8833	0.00223
1674	0.000108243		27.9	0.000108243
1675	-0.000977414		27.9167	-0.000977414
1676	-0.00233		27.9333	-0.00233
1677	-0.00042873		27.95	-0.00042873
1678	0.000615612		27.9667	0.000615612
1679	0.000689954		27.9833	0.000689954
1680	-0.000755704		28	-0.000755704
1681	-0.00118		28.0167	-0.00118
1682	-0.00011702		28.0333	-0.00011702
1683	0.00618		28.05	0.00618
1684	0.01224		28.0667	0.01224
1685	0.01663		28.0833	0.01663
1686	0.01122		28.1	0.01122
1687	-0.00475		28.1167	-0.00475
1688	-0.0264		28.1333	-0.0264
1689	-0.04269		28.15	-0.04269
1690	-0.04491		28.1667	-0.04491
1691	-0.03412		28.1833	-0.03412
1692	-0.01839		28.2	-0.01839
1693	-0.00313		28.2167	-0.00313
1694	0.0075		28.2333	0.0075
1695	0.01443		28.25	0.01443
1696	0.01804		28.2667	0.01804
1697	0.0212		28.2833	0.0212
1698	0.02079		28.3	0.02079
1699	0.01867		28.3167	0.01867
1700	0.01426		28.3333	0.01426
1701	0.01158		28.35	0.01158
1702	0.00821		28.3667	0.00821
1703	0.00618		28.3833	0.00618
1704	0.00133		28.4	0.00133
1705	-0.0012		28.4167	-0.0012
1706	-0.00648		28.4333	-0.00648
1707	-0.008		28.45	-0.008
1708	-0.00898		28.4667	-0.00898
1709	-0.00412		28.4833	-0.00412
1710	-0.000126083		28.5	-0.000126083
1711	0.00264		28.5167	0.00264
1712	0.000926765		28.5333	0.000926765
1713	-0.00241		28.55	-0.00241
1714	-0.00587		28.5667	-0.00587
1715	-0.00838		28.5833	-0.00838
1716	-0.00772		28.6	-0.00772
1717	-0.00631		28.6167	-0.00631
1718	-0.00408		28.6333	-0.00408
1719	-0.00377		28.65	-0.00377
1720	-0.00484		28.6667	-0.00484
1721	-0.00638		28.6833	-0.00638
1722	-0.0079		28.7	-0.0079
1723	-0.00514		28.7167	-0.00514
1724	-0.00477		28.7333	-0.00477
1725	-0.00403		28.75	-0.00403
1726	-0.00547		28.7667	-0.00547
1727	-0.00625		28.7833	-0.00625
1728	-0.00474		28.8	-0.00474
1729	-0.00378		28.8167	-0.00378
1730	-0.00144		28.8333	-0.00144
1731	-0.00118		28.85	-0.00118
1732	-0.00147		28.8667	-0.00147
1733	0.0015		28.8833	0.0015
1734	0.00358		28.9	0.00358
1735	0.00574		28.9167	0.00574
1736	0.00547		28.9333	0.00547
1737	0.00544		28.95	0.00544
1738	0.00546		28.9667	0.00546
1739	0.00554		28.9833	0.00554
1740	0.00583		29	0.00583
1741	0.00503		29.0167	0.00503
1742	0.00393		29.0333	0.00393
1743	0.00398		29.05	0.00398
1744	0.00475		29.0667	0.00475
1745	0.00532		29.0833	0.00532
1746	0.00411		29.1	0.00411
1747	0.00571		29.1167	0.00571
1748	0.0065		29.1333	0.0065
1749	0.00754		29.15	0.00754
1750	0.00706		29.1667	0.00706
1751	0.00623		29.1833	0.00623
1752	0.00795		29.2	0.00795
1753	0.00626		29.2167	0.00626
1754	0.00442		29.2333	0.00442
1755	0.00206		29.25	0.00206
1756	0.00236		29.2667	0.00236
1757	0.00388		29.2833	0.00388
1758	0.00624		29.3	0.00624
1759	0.00665		29.3167	0.00665
1760	0.00523		29.3333	0.00523
1761	0.00208		29.35	0.00208
1762	0.0018		29.3667	0.0018
1763	0.00366		29.3833	0.00366
1764	0.00461		29.4	0.00461
1765	0.0056		29.4167	0.0056
1766	0.00619		29.4333	0.00619
1767	0.00662		29.45	0.00662
1768	0.0044		29.4667	0.0044
1769	0.00127		29.4833	0.00127
1770	-0.000582203		29.5	-0.000582203
1771	-0.00119		29.5167	-0.00119
1772	8.69235e-05		29.5333	8.69235e-05
1773	0.00142		29.55	0.00142
1774	0.00363		29.5667	0.00363
1775	0.00337		29.5833	0.00337
1776	0.00162		29.6	0.00162
1777	-0.00116		29.6167	-0.00116
1778	-0.00219		29.6333	-0.00219
1779	-0.000326133		29.65	-0.000326133
1780	0.0035		29.6667	0.0035
1781	0.00663		29.6833	0.00663
1782	0.0077		29.7	0.0077
1783	0.00684		29.7167	0.00684
1784	0.00589		29.7333	0.00589
1785	0.00465		29.75	0.00465
1786	0.00351		29.7667	0.00351
1787	0.00233		29.7833	0.00233
1788	0.00192		29.8	0.00192
1789	0.00169		29.8167	0.00169
1790	0.00113		29.8333	0.00113
1791	0.000318627		29.85	0.000318627
1792	-0.00117		29.8667	-0.00117
1793	-0.00199		29.8833	-0.00199
1794	-0.00129		29.9	-0.00129
1795	-0.00039312		29.9167	-0.00039312
1796	0.000916444		29.9333	0.000916444
1797	0.000816007		29.95	0.000816007
1798	0.0031		29.9667	0.0031
1799	0.00409		29.9833	0.00409
1800	0.00387		30	0.00387
1801	0.00070426		30.0167	0.00070426
1802	-0.00184		30.0333	-0.00184
1803	-0.0019		30.05	-0.0019
1804	0.00062295		30.0667	0.00062295
1805	0.00345		30.0833	0.00345
1806	0.00476		30.1	0.00476
1807	0.00446		30.1167	0.00446
1808	0.00332		30.1333	0.00332
1809	0.00196		30.15	0.00196
1810	0.00217		30.1667	0.00217
1811	0.00549		30.1833	0.00549
1812	0.00728		30.2	0.00728
1813	0.00593		30.2167	0.00593
1814	0.00263		30.2333	0.00263
1815	0.00273		30.25	0.00273
1816	0.00294		30.2667	0.00294
1817	0.00145		30.2833	0.00145
1818	-0.00235		30.3	-0.00235
1819	-0.00397		30.3167	-0.00397
1820	-0.00405		30.3333	-0.00405
1821	-0.00249		30.35	-0.00249
1822	-0.00145		30.3667	-0.00145
1823	-0.000398586		30.3833	-0.000398586
1824	0.00102		30.4	0.00102
1825	0.00114		30.4167	0.00114
1826	0.00156		30.4333	0.00156
1827	7.40562e-05		30.45	7.40562e-05
1828	0.00127		30.4667	0.00127
1829	0.00149		30.4833	0.00149
1830	0.00179		30.5	0.00179
1831	0.00146		30.5167	0.00146
1832	0.000859859		30.5333	0.000859859
1833	0.00028302		30.55	0.00028302
1834	-0.000643819		30.5667	-0.000643819
1835	-0.00119		30.5833	-0.00119
1836	-0.00334		30.6	-0.00334
1837	-0.00326		30.6167	-0.00326
1838	-0.00297		30.6333	-0.00297
1839	0.000361984		30.65	0.000361984
1840	-0.000944856		30.6667	-0.000944856
1841	-0.00111		30.6833	-0.00111
1842	-0.000418534		30.7	-0.000418534
1843	0.00189		30.7167	0.00189
1844	0.00438		30.7333	0.00438
1845	0.00406		30.75	0.00406
1846	0.00353		30.7667	0.00353
1847	-0.00175		30.7833	-0.00175
1848	-0.00386		30.8	-0.00386
1849	-0.00651		30.8167	-0.00651
1850	-0.00482		30.8333	-0.00482
1851	-0.00246		30.85	-0.00246
1852	0.000653072		30.8667	0.000653072
1853	0.00314		30.8833	0.00314
1854	0.00168		30.9	0.00168
1855	-0.00079818		30.9167	-0.00079818
1856	-0.00287		30.9333	-0.00287
1857	-0.00163		30.95	-0.00163
1858	0.0012		30.9667	0.0012
1859	0.00521		30.9833	0.00521
1860	0.00684		31	0.00684
1861	0.00647		31.0167	0.00647
1862	0.00317		31.0333	0.00317
1863	0.00266		31.05	0.00266
1864	0.00627		31.0667	0.00627
1865	0.00816		31.0833	0.00816
1866	0.00388		31.1	0.00388
1867	-0.01158		31.1167	-0.01158
1868	-0.02918		31.1333	-0.02918
1869	-0.04066		31.15	-0.04066
1870	-0.03676		31.1667	-0.03676
1871	-0.02222		31.1833	-0.02222
1872	-0.00609		31.2	-0.00609
1873	0.00692		31.2167	0.00692
1874	0.0158		31.2333	0.0158
1875	0.01994		31.25	0.01994
1876	0.01892		31.2667	0.01892
1877	0.01409		31.2833	0.01409
1878	0.00916		31.3	0.00916
1879	0.00634		31.3167	0.00634
1880	0.00339		31.3333	0.00339
1881	0.00115		31.35	0.00115
1882	-0.00197		31.3667	-0.00197
1883	-0.00106		31.3833	-0.00106
1884	-0.000665443		31.4	-0.000665443
1885	-0.00142		31.4167	-0.00142
1886	-0.00475		31.4333	-0.00475
1887	-0.0048		31.45	-0.0048
1888	-0.00282		31.4667	-0.00282
1889	0.000957788		31.4833	0.000957788
1890	0.00267		31.5	0.00267
1891	0.00284		31.5167	0.00284
1892	0.00304		31.5333	0.00304
1893	0.000874372		31.55	0.000874372
1894	-0.00195		31.5667	-0.00195
1895	-0.00513		31.5833	-0.00513
1896	-0.00793		31.6	-0.00793
1897	-0.00854		31.6167	-0.00854
1898	-0.00906		31.6333	-0.00906
1899	-0.00735		31.65	-0.00735
1900	-0.00568		31.6667	-0.00568
1901	-0.00313		31.6833	-0.00313
1902	-0.00183		31.7	-0.00183
1903	2.6906e-05		31.7167	2.6906e-05
1904	-0.00235		31.7333	-0.00235
1905	-0.0035		31.75	-0.0035
1906	-0.00468		31.7667	-0.00468
1907	-0.00254		31.7833	-0.00254
1908	-0.00305		31.8	-0.00305
1909	-0.0055		31.8167	-0.0055
1910	-0.00818		31.8333	-0.00818
1911	-0.00744		31.85	-0.00744
1912	-0.00507		31.8667	-0.00507
1913	-0.00251		31.8833	-0.00251
1914	0.000325209		31.9	0.000325209
1915	0.00119		31.9167	0.00119
1916	0.00213		31.9333	0.00213
1917	0.000623838		31.95	0.000623838
1918	-0.000339953		31.9667	-0.000339953
1919	-0.00104		31.9833	-0.00104
1920	-0.00145		32	-0.00145
1921	-0.000241325		32.0167	-0.000241325
1922	0.000174885		32.0333	0.000174885
1923	0.000381094		32.05	0.000381094
1924	-0.00156		32.0667	-0.00156
1925	-0.0016		32.0833	-0.0016
1926	-0.000510278		32.1	-0.000510278
1927	0.00317		32.1167	0.00317
1928	0.00391		32.1333	0.00391
1929	0.00349		32.15	0.00349
1930	0.00292		32.1667	0.00292
1931	0.00207		32.1833	0.00207
1932	-0.000893021		32.2	-0.000893021
1933	-0.00368		32.2167	-0.00368
1934	-0.0033		32.2333	-0.0033
1935	-0.000824393		32.25	-0.000824393
1936	0.000331817		32.2667	0.000331817
1937	0.000518026		32.2833	0.000518026
1938	0.00204		32.3	0.00204
1939	0.00566		32.3167	0.00566
1940	0.00542		32.3333	0.00542
1941	0.00297		32.35	0.00297
1942	-0.000824377		32.3667	-0.000824377
1943	-0.00157		32.3833	-0.00157
1944	-0.00103		32.4	-0.00103
1945	0.00132		32.4167	0.00132
1946	0.00435		32.4333	0.00435
1947	0.00581		32.45	0.00581
1948	0.00467		32.4667	0.00467
1949	0.00483		32.4833	0.00483
1950	0.00673		32.5	0.00673
1951	0.00716		32.5167	0.00716
1952	0.00635		32.5333	0.00635
1953	0.00285		32.55	0.00285
1954	9.43784e-05		32.5667	9.43784e-05
1955	-0.00223		32.5833	-0.00223
1956	-0.00355		32.6	-0.00355
1957	-0.00378		32.6167	-0.00378
1958	-0.004		32.6333	-0.004
1959	-0.00281		32.65	-0.00281
1960	-0.00312		32.6667	-0.00312
1961	-0.00311		32.6833	-0.00311
1962	-0.00147		32.7	-0.00147
1963	0.000410945		32.7167	0.000410945
1964	0.000158341		32.7333	0.000158341
1965	-0.00145		32.75	-0.00145
1966	-0.00314		32.7667	-0.00314
1967	-0.00388		32.7833	-0.00388
1968	-0.00274		32.8	-0.00274
1969	0.000625323		32.8167	0.000625323
1970	0.00302		32.8333	0.00302
1971	0.00308		32.85	0.00308
1972	0.00329		32.8667	0.00329
1973	0.00424		32.8833	0.00424
1974	0.00515		32.9	0.00515
1975	0.00325		32.9167	0.00325
1976	0.00217		32.9333	0.00217
1977	0.000534493		32.95	0.000534493
1978	2.18897e-05		32.9667	2.18897e-05
1979	-0.00184		32.9833	-0.00184
1980	-0.00265		33	-0.00265
1981	-0.0033		33.0167	-0.0033
1982	-0.00172		33.0333	-0.00172
1983	0.000263598		33.05	0.000263598
1984	0.00391		33.0667	0.00391
1985	0.00405		33.0833	0.00405
1986	0.00298		33.1	0.00298
1987	0.000477661		33.1167	0.000477661
1988	0.000806177		33.1333	0.000806177
1989	0.000674693		33.15	0.000674693
1990	0.000263209		33.1667	0.000263209
1991	0.000871724		33.1833	0.000871724
1992	0.00024024		33.2	0.00024024
1993	1.87558e-05		33.2167	1.87558e-05
1994	-0.00182		33.2333	-0.00182
1995	-0.00215		33.25	-0.00215
1996	-0.00216		33.2667	-0.00216
1997	-0.000447181		33.2833	-0.000447181
1998	0.00236		33.3	0.00236
1999	0.00501		33.3167	0.00501
2000	0.006		33.3333	0.006
2001	0.00515		33.35	0.00515
[truncated: 1,661 more rows]

## Sheet: Figure5G
SiNRAT1
S68A
Mn
	NORMALIZED DATA																														Concentrations
			Mn concentration (uM)								Mn concentration (uM)								Mn concentration (uM)												Mean	SEM	N
Cycle Nr.	Time (min)		0	1	5	10	25	50	200	400	0	1	5	10	25	50	200	400	0	1	5	10	25	50	200	400				Time (min)	0 μM Mn2+			1 μM Mn2+			5 μM Mn2+			10 μM Mn2+			25 μM Mn2+			50 μM Mn2+			200 μM Mn2+
1	-5.79337		100.317	102.302	110.934	111.995	97.9373	114.493	121.03	137.612	143.43	147.385	145.89	163.165	157.615	162.428	173.231	173.502	123.555	105.23	138.822	136.742	162.245	153.136	155.03	145.815				-5.79337	122.434	12.4582	3	118.306	14.5644	3	131.882	10.6709	3	137.301	14.7741	3	139.266	20.7075	3	143.352	14.677	3	149.764
2	-5.72617		100.122	100.23	108.501	111.484	98.1916	111.159	120.747	134.048	140.284	144.351	144.013	160.185	159.407	162.931	168.782	173.574	121.608	103.781	134.471	135.106	161.852	151.983	157.207	140.765				-5.72617	120.671	11.6032	3	116.121	14.1524	3	128.995	10.6107	3	135.591	14.0608	3	139.817	20.8247	3	142.024	15.7528	3	148.912
3	-5.6595		95.0952	97.0588	106.544	110.915	97.2874	112.29	120.088	132.353	142.073	146.611	144.79	158.339	160.786	159.914	172.356	174.657	118.153	106.742	132.262	138.65	161.146	150.108	153.453	146.753				-5.6595	118.44	13.562	3	116.804	15.1633	3	127.865	11.2575	3	135.968	13.7556	3	139.74	21.2264	3	140.771	14.519	3	148.632
4	-5.59283		95.8516	95.0895	104.279	107.334	97.5134	112.029	118.456	130.9	136.891	140.542	144.272	159.333	155.203	160.632	164.989	169.025	117.274	105.671	133.4	134.151	161.381	153.641	154.129	144.661				-5.59283	116.672	11.8508	3	113.768	13.7314	3	127.317	11.939	3	133.606	15.0134	3	138.033	20.338	3	142.101	15.1707	3	145.858
5	-5.52617		94.3875	95.422	104.139	107.135	95.6485	109.362	115.568	129.446	138.495	141.188	139.871	155.997	155.548	160.129	165.135	166.498	116.646	109.956	128.447	132.379	157.457	145.061	155.706	145.815				-5.52617	116.509	12.7329	3	115.522	13.5014	3	124.152	10.5361	3	131.837	14.108	3	136.218	20.2921	3	138.184	15.0531	3	145.47
6	-5.4595		93.8263	93.9898	103.719	106.197	96.3266	107.971	114.595	127.855	138.68	140.09	137.799	156.92	153.274	155.603	163.384	161.516	111.683	105.608	131.861	131.629	153.611	140.591	153.829	140.26				-5.4595	114.73	13.0374	3	113.229	13.8429	3	124.46	10.511	3	131.582	14.6425	3	134.404	19.0387	3	134.722	14.06	3	143.936
7	-5.39283		94.0947	93.2481	103.887	105.657	95.9876	102.377	116.353	126.159	133.498	140.542	137.735	152.378	150.655	152.514	158.497	170.903	116.52	107.624	130.054	131.629	152.433	144.052	153.003	139.25				-5.39283	114.704	11.4109	3	113.805	13.998	3	123.892	10.2452	3	129.888	13.5153	3	133.025	18.5259	3	132.981	15.4959	3	142.618
8	-5.32617		91.9229	92.4552	102.601	104.093	95.0834	103.623	115.599	126.401	131.771	135.055	137.476	151.1	146.657	154.023	159.446	180.866	119.158	108.129	124.364	129.38	152.198	138.861	148.874	141.342				-5.32617	114.284	11.7584	3	111.88	12.4397	3	121.48	10.1703	3	128.191	13.5827	3	131.313	18.1852	3	132.169	14.929	3	141.306
9	-5.25952		92.0693	92.5575	100.979	103.809	94.6878	101.449	114.47	124.221	133.004	136.54	134.563	147.551	148.38	147.486	157.987	171.625	112.814	108.192	126.506	123.517	147.41	135.472	146.396	136.869				-5.25952	112.629	11.8173	3	112.43	12.8722	3	120.683	10.1228	3	124.959	12.6479	3	130.159	17.738	3	128.136	13.7865	3	139.618
10	-5.19283		91.1176	91.9949	101.174	102.302	93.6705	101.652	114.752	125.225	138.433	132.795	133.786	146.771	144.452	144.756	156.09	180	115.766	105.923	124.498	124.744	149.215	137.13	147.673	135.209				-5.19283	115.106	13.6628	3	110.238	11.974	3	119.82	9.7005	3	124.606	12.8371	3	129.113	17.7743	3	127.846	13.2807	3	139.505
11	-5.12617		90.6296	90.5371	102.013	100.739	94.829	101.217	111.08	122.422	132.634	130.794	132.686	147.906	142.729	148.132	155.288	191.047	114.447	108.633	124.096	126.858	145.84	135.689	146.697	133.838				-5.12617	112.57	12.1619	3	109.988	11.6409	3	119.599	9.13557	3	125.168	13.6422	3	127.799	16.5096	3	128.346	14.0319	3	137.688
12	-5.0595		90.1415	90.6394	99.8322	101.052	93.8118	101.739	110.358	122.007	132.511	129.374	129.773	144.358	141.282	145.402	153.611	185.199	114.698	106.805	123.427	122.972	144.819	134.823	142.568	134.704				-5.0595	112.45	12.2825	3	108.939	11.2325	3	117.678	9.10883	3	122.794	12.5017	3	126.638	16.4447	3	127.322	13.1507	3	135.512
13	-4.9928		88.8238	90.1279	98.1823	99.9147	94.8856	98.9565	110.138	120.519	129.118	129.309	128.608	141.164	139.49	144.397	151.714	188.664	113.254	104.789	118.942	123.177	147.174	131.795	141.667	131.962				-4.9928	110.398	11.7192	3	108.075	11.4294	3	115.244	8.97576	3	121.418	11.94	3	127.183	16.3005	3	125.049	13.5441	3	134.506
14	-4.92612		88.8726	90.4092	99.3289	100.853	94.3487	101.043	109.448	120.415	128.254	127.824	126.278	142.583	139.559	141.595	149.891	174.296	111.055	104.726	120.683	120.586	142.386	133.453	141.892	131.457				-4.92612	109.394	11.3988	3	107.653	10.8996	3	115.43	8.211	3	121.341	12.0525	3	125.431	15.5627	3	125.364	12.3852	3	133.743
15	-4.85947		87.9453	90.6394	98.406	97.328	94.829	100.87	109.793	119.896	125.478	129.051	122.718	142.158	139.076	141.236	149.38	166.282	109.485	104.726	119.277	120.995	142.622	129.56	139.94	131.385				-4.85947	107.636	10.8741	3	108.139	11.219	3	113.467	7.59581	3	120.16	12.9479	3	125.509	15.3741	3	123.888	11.9928	3	133.038
16	-4.7928		86.9204	88.6445	96.3647	98.7493	94.9138	98.9275	107.941	120	127.144	128.728	125.178	140.17	138.112	140.661	147.702	175.162	107.852	105.545	117.537	120.586	143.328	131.002	139.039	130.303				-4.7928	107.305	11.6147	3	107.639	11.6184	3	113.026	8.61799	3	119.835	11.9631	3	125.451	15.3428	3	123.53	12.6134	3	131.561
17	-4.72613		87.7501	88.6445	97.651	97.2712	93.3032	99.4203	109.856	120.761	124.121	125.694	122.395	139.035	139.283	143.247	146.098	180.722	111.181	103.466	118.474	119.905	142.308	127.109	141.291	127.922				-4.72613	107.684	10.6439	3	105.935	10.7663	3	112.84	7.67833	3	118.737	12.0702	3	124.965	15.8548	3	123.259	12.7973	3	132.415
18	-4.65947		86.1884	88.5166	95.5817	98.1524	94.0096	97.4783	106.309	118.374	123.874	124.597	123.495	139.177	138.181	140.589	141.94	188.087	108.982	104.096	114.793	120.382	140.424	130.714	138.514	128.86				-4.65947	106.348	10.9584	3	105.736	10.4476	3	111.29	8.24605	3	119.237	11.8565	3	124.205	15.1114	3	122.927	13.0398	3	128.921
19	-4.5928		86.53	86.7519	96.6723	95.3098	93.614	98.1449	106.372	117.889	125.293	125.113	123.43	138.751	134.941	140.086	143.545	176.39	108.92	102.016	115.462	117.86	140.267	128.335	139.79	128.211				-4.5928	106.914	11.2347	3	104.627	11.1506	3	111.855	7.93215	3	117.307	12.5434	3	122.941	14.7437	3	122.189	12.4913	3	129.902
20	-4.52613		85.6759	87.1611	95.8054	94.7413	92.0316	96.9275	105.43	119.066	122.579	125.242	122.848	135.983	132.943	139.08	143.399	142.31	108.982	103.277	115.328	116.155	136.028	126.532	139.489	127.417				-4.52613	105.746	10.7751	3	105.227	11.0362	3	111.327	8.05874	3	115.627	11.9084	3	120.334	14.1793	3	120.847	12.4961	3	129.44
21	-4.45947		85.3099	86.5473	95.3579	95.7646	92.512	96.9275	107.156	117.474	123.134	121.627	120.065	136.338	133.287	138.147	142.305	141.588	105.716	103.025	114.659	114.928	138.305	127.109	137.012	127.85				-4.45947	104.72	10.9302	3	103.733	10.1328	3	110.027	7.49876	3	115.677	11.7184	3	121.368	14.5005	3	120.728	12.3193	3	128.824
22	-4.39305		86.164	86.4194	96.3647	95.6794	92.6815	97.3333	106.058	116.713	119.247	122.853	121.036	135.628	134.597	136.207	140.627	140.289	105.653	102.52	115.261	115.269	135.4	124.73	139.189	123.232				-4.39305	103.688	9.60077	3	103.931	10.5412	3	110.887	7.45011	3	115.526	11.5329	3	120.893	14.1076	3	119.423	11.5312	3	128.625
23	-4.32635		84.0898	87.0332	94.7148	93.9738	91.3535	96.2609	105.744	116.401	123.627	124.209	121.1	135.557	130.875	139.224	139.241	139.856	106.344	103.529	114.19	114.792	134.38	124.946	136.261	126.335				-4.32635	104.687	11.4436	3	104.924	10.7544	3	110.002	7.89949	3	114.774	12.0041	3	118.87	13.7952	3	120.144	12.6327	3	127.082
24	-4.25942		85.6271	87.1355	95.4978	95.1677	92.5403	95.6232	105.524	115.744	124.614	122.789	120.971	133.499	132.805	138.649	140.117	139.206	107.098	103.529	114.257	115.746	136.735	125.523	138.814	123.737				-4.25942	105.78	11.2739	3	104.484	10.3033	3	110.242	7.62258	3	114.804	11.0753	3	120.693	14.1222	3	119.932	12.7313	3	128.152
25	-4.19275		83.919	87.0077	94.0436	95.054	92.0599	97.4493	105.336	115.986	126.033	122.789	121.23	133.499	130.117	141.02	140.7	138.556	107.977	102.331	111.914	113.565	133.83	123.504	136.186	124.098				-4.19275	105.977	12.1984	3	104.043	10.3645	3	109.063	7.97645	3	114.039	11.1006	3	118.669	13.3478	3	120.658	12.6581	3	127.407
26	-4.12608		85.0659	86.624	94.6309	94.7129	90.9296	96.5507	105.053	115.433	123.627	121.627	119.547	133.996	128.394	133.908	138.074	136.101	105.402	105.23	113.052	116.155	134.929	122.278	135.435	123.737				-4.12608	104.698	11.1373	3	104.494	10.1112	3	109.077	7.46226	3	114.955	11.3558	3	118.084	13.7078	3	117.579	11.0371	3	126.188
27	-4.0594		82.7477	85.4731	94.9105	94.4571	91.0709	96.2319	104.426	114.118	121.777	123.564	117.929	133.854	131.082	134.77	137.71	136.679	106.595	104.537	111.446	112.065	134.301	120.115	136.486	122.799				-4.0594	103.707	11.3589	3	104.525	10.9958	3	108.095	6.85276	3	113.459	11.3942	3	118.818	13.9047	3	117.039	11.2309	3	126.207
28	-3.99273		84.2362	85.6777	93.1208	93.2916	90.7318	96.4348	105.399	116.436	123.812	121.24	117.217	135.202	134.252	134.842	138.731	136.606	105.402	103.529	113.855	112.474	132.81	122.495	134.685	123.882				-3.99273	104.484	11.4339	3	103.482	10.2658	3	108.064	7.53451	3	113.656	12.113	3	119.265	14.2725	3	117.924	11.3203	3	126.271
29	-3.92607		83.6018	84.9616	93.2327	92.4957	90.4493	94.6087	103.421	115.536	123.196	119.884	115.728	133.925	129.152	133.405	139.825	135.668	106.156	101.008	111.178	112.134	130.534	121.125	136.261	122.727				-3.92607	104.318	11.4666	3	101.951	10.0922	3	106.713	6.86695	3	112.851	11.9649	3	116.712	13.1373	3	116.38	11.4481	3	126.502
30	-3.8594		83.2601	86.0102	94.6588	93.0927	89.9407	96.6377	104.739	114.048	125.787	119.367	116.375	131.015	127.567	135.057	139.023	135.307	106.156	101.386	111.647	113.156	130.22	121.053	133.183	121.212				-3.8594	105.068	12.2884	3	102.255	9.63914	3	107.56	6.59358	3	112.421	10.9534	3	115.909	13.0068	3	117.583	11.2257	3	125.648
31	-3.79273		83.3821	85.8568	92.9251	92.9221	90.9862	93.6522	105.493	114.429	126.403	118.012	116.246	133.57	129.359	132.471	138.22	131.408	107.035	103.529	111.379	111.929	131.083	120.332	132.883	121.573				-3.79273	105.607	12.4397	3	102.466	9.2975	3	106.85	7.1028	3	112.807	11.7422	3	117.143	13.0878	3	115.485	11.4651	3	125.532
32	-3.72607		82.4549	84.757	92.981	94.4002	89.6298	93.5652	104.896	113.806	126.28	118.076	115.146	131.441	127.223	137.428	134.865	133.574	106.407	103.277	112.115	111.452	130.769	118.241	134.76	122.367				-3.72607	105.047	12.6695	3	102.037	9.63838	3	106.747	6.9385	3	112.431	10.7039	3	115.874	13.1619	3	116.411	12.6951	3	124.84
33	-3.6596		83.2845	85.2174	92.5336	92.3252	89.6298	93.7101	103.233	113.287	125.601	118.593	115.663	130.66	127.429	133.693	136.324	151.986	106.281	102.899	109.973	111.997	131.319	117.376	134.084	119.841				-3.6596	105.056	12.2312	3	102.236	9.64028	3	106.057	6.95824	3	111.661	11.0676	3	116.126	13.2956	3	114.926	11.6067	3	124.547
34	-3.59293		82.5281	85.9591	92.3378	93.1779	89.6581	94.8116	103.233	112.457	126.65	116.85	115.016	128.105	129.083	132.112	133.698	141.877	106.721	102.836	109.772	110.225	129.513	117.52	132.432	121.645				-3.59293	105.3	12.7568	3	101.881	8.93008	3	105.709	6.85473	3	110.503	10.0835	3	116.085	13.214	3	114.814	10.8524	3	123.121
35	-3.52602		83.2113	84.4501	92.1141	92.2115	89.9972	93.7101	102.134	112.353	125.787	117.366	116.958	127.253	127.705	130.891	132.385	131.336	101.633	102.773	110.107	112.202	127.551	119.466	132.508	119.769				-3.52602	103.544	12.3275	3	101.53	9.5223	3	106.393	7.40832	3	110.556	10.1492	3	115.084	12.5437	3	114.689	10.9957	3	122.342
36	-3.45935		82.5037	84.9361	92.198	90.9892	90.1102	94.4348	103.202	112.872	130.105	116.398	115.016	126.473	124.742	131.825	132.458	129.819	102.952	102.457	110.174	111.656	128.257	118.818	132.583	122.078				-3.45935	105.187	13.7866	3	101.264	9.10179	3	105.796	6.94124	3	109.706	10.2895	3	114.37	12.1722	3	115.026	10.9588	3	122.747
37	-3.39268		82.4305	82.9412	92.0582	90.9608	90.4493	92.6957	101.789	113.772	126.959	117.366	115.146	127.253	123.57	133.261	132.02	129.819	103.015	103.34	109.304	111.52	129.356	118.745	130.931	118.687				-3.39268	104.135	12.8664	3	101.216	9.99418	3	105.503	6.93049	3	109.911	10.5076	3	114.459	12.1203	3	114.901	11.8671	3	121.58
38	-3.32602		81.7716	84.8849	91.9183	92.6663	90.3645	93.3333	100.973	113.875	126.589	116.656	113.722	127.537	124.259	128.807	130.343	131.408	105.905	101.197	110.91	110.293	128.885	117.448	131.006	118.11				-3.32602	104.755	12.9503	3	100.913	9.1726	3	105.517	6.84749	3	110.166	10.0666	3	114.503	12.1429	3	113.196	10.4588	3	120.774
39	-3.25958		81.2592	84.8338	90.6879	91.3303	90.1667	94.5797	101.601	112.111	119.494	115.107	112.557	125.195	127.016	131.034	130.416	129.386	105.905	103.466	108.902	109.339	130.063	116.294	129.805	119.481				-3.25958	102.219	11.1902	3	101.135	8.81632	3	104.049	6.76329	3	108.621	9.78253	3	115.748	12.8211	3	113.969	10.5876	3	120.607
40	-3.19267		81.3812	84.3478	91.1633	90.3354	90.1667	94.2319	101.412	113.668	115.854	113.234	113.722	124.344	123.156	130.172	133.26	131.552	107.224	99.5589	109.973	111.111	129.278	116.366	127.928	116.955				-3.19267	101.486	10.3568	3	99.047	8.34273	3	104.953	6.97911	3	108.597	9.89746	3	114.2	12.1461	3	113.59	10.4676	3	120.867
41	-3.12627		81.5764	83.4783	90.4642	91.3303	89.4886	92.9855	100.722	111.211	115.114	114.59	112.557	125.692	123.501	129.813	131.072	133.646	106.093	101.827	109.036	111.725	129.278	118.025	128.453	118.254				-3.12627	100.928	10.02	3	99.9652	9.02934	3	104.019	6.85315	3	109.582	9.97704	3	114.089	12.4128	3	113.608	10.8582	3	120.083
42	-3.0596		81.1371	83.0691	92.4497	89.9659	91.2687	91.7101	101.381	112.284	116.595	112.976	112.751	127.537	124.466	125.934	131.145	130.108	104.146	100.882	110.442	111.384	126.923	118.673	127.703	119.913				-3.0596	100.626	10.3859	3	98.9758	8.68588	3	105.214	6.41693	3	109.629	10.8814	3	114.219	11.4972	3	112.106	10.411	3	120.076
43	-2.99273		82.1132	84.0409	90.8277	91.1597	90.1102	92.7246	99.7489	111.869	118.26	114.267	110.744	122.995	129.359	126.293	131.072	128.52	104.585	102.205	109.17	107.362	125.51	117.304	127.477	118.398				-2.99273	101.653	10.5373	3	100.171	8.78468	3	103.581	6.39264	3	107.172	9.19053	3	114.993	12.491	3	112.107	10.0327	3	119.433
44	-2.92607		80.5515	83.6573	90.5201	89.2837	90.7884	93.0435	101.35	112.803	115.484	113.105	109.515	123.137	125.982	127.371	131.656	129.603	104.02	102.457	107.898	110.293	128.493	118.818	126.652	118.831				-2.92607	100.019	10.2808	3	99.74	8.60878	3	102.644	6.08004	3	107.571	9.86692	3	115.088	12.1713	3	113.077	10.3167	3	119.886
45	-2.8594		80.6979	83.0946	90.5481	90.7618	90.195	92.9275	100.722	112.007	114.682	111.943	111.327	123.563	123.225	126.796	129.613	128.664	104.271	101.323	107.43	108.453	125.51	116.078	127.027	117.821				-2.8594	99.8839	10.0527	3	98.787	8.42386	3	103.102	6.37676	3	107.592	9.4786	3	112.977	11.41	3	111.934	9.99414	3	119.121
46	-2.79272		80.6735	83.2481	90.3244	90.1649	89.7146	92.6957	100.596	113.875	115.299	112.201	110.227	123.066	119.021	123.994	132.02	127.004	103.706	101.89	108.969	110.157	127.943	116.51	124.85	118.615				-2.79272	99.8929	10.1758	3	99.1133	8.47266	3	103.173	6.43473	3	107.796	9.57082	3	112.227	11.5469	3	111.067	9.43622	3	119.156
47	-2.72605		80.5759	85.1151	89.6812	90.0227	90.3928	91.3913	100.188	109.896	115.423	111.104	111.197	120.937	117.781	125.862	128.811	132.78	106.784	104.348	106.426	110.634	128.1	116.078	125.45	117.027				-2.72605	100.927	10.4769	3	100.189	7.78517	3	102.435	6.52386	3	107.198	9.08799	3	112.091	11.2509	3	111.11	10.2561	3	118.15
48	-2.65938		80.2343	83.913	89.1499	89.7669	89.5168	92.6957	100.534	108.754	112.091	112.847	110.485	122.782	119.642	124.856	130.78	130.83	103.266	103.97	106.961	111.384	126.923	115.357	125	118.11				-2.65938	98.5306	9.49628	3	100.243	8.55782	3	102.199	6.60331	3	107.978	9.68164	3	112.027	11.4498	3	110.97	9.53962	3	118.771
49	-2.59272		80.7955	84.7826	88.9821	90.307	89.6864	91.5362	100.251	109.931	112.585	111.298	110.874	122.214	119.779	124.425	129.613	129.675	104.585	104.726	105.689	109.407	123.469	116.294	125.676	116.45				-2.59272	99.3219	9.54669	3	100.269	7.97206	3	101.848	6.60496	3	107.309	9.27036	3	110.978	10.6992	3	110.752	9.89041	3	118.513
50	-1.53142		118.521	123.504	125.475	133.258	132.015	135.449	143.597	140.692	110.549	114.913	115.534	121.789	121.502	126.868	128.665	140.722	108.166	108.948	112.651	118.405	131.083	125.667	132.733	127.201				-1.53142	112.412	3.13112	3	115.788	4.22471	3	117.887	3.88459	3	124.484	4.49436	3	128.2	3.35963	3	129.328	3.08022	3	134.998
51	-1.48777		114.495	122.123	123.881	132.973	127.098	130.725	140.552	143.841	109.007	113.105	115.728	122.569	123.088	128.017	129.103	144.477	107.538	110.46	115.529	117.86	131.319	124.225	136.036	122.872				-1.48777	110.346	2.11713	3	115.229	3.53031	3	118.379	2.75157	3	124.467	4.46498	3	127.168	2.3764	3	127.656	1.88499	3	135.23
52	-1.44427		114.861	118.721	120.218	130.642	129.726	130.29	138.983	142.284	122.764	113.815	114.563	121.008	120.124	126.149	129.395	144.043	106.595	108.381	114.659	117.11	127.551	124.585	131.682	124.242				-1.44427	114.74	4.66775	3	113.639	2.98638	3	116.48	1.86929	3	122.92	4.02185	3	125.8	2.90673	3	127.008	1.70182	3	133.353
53	-1.4008		113.031	116.573	119.379	130.841	127.691	128.348	140.804	141.903	121.283	111.62	113.139	122.782	119.573	125.862	130.124	143.827	108.103	113.359	111.981	116.905	123.548	124.225	130.33	124.747				-1.4008	114.139	3.84494	3	113.851	1.45068	3	114.833	2.29743	3	123.51	4.03944	3	123.604	2.34383	3	126.145	1.19855	3	133.753
54	-1.35703		111.689	115.601	118.317	125.469	126.844	130.696	133.114	140.242	118.507	109.684	113.333	120.156	119.848	125.503	128.009	137.834	107.224	111.09	111.312	114.042	124.568	124.153	131.006	121.861				-1.35703	112.473	3.2808	3	112.125	1.78482	3	114.321	2.08147	3	119.889	3.3013	3	123.753	2.06006	3	126.784	1.9944	3	130.709
55	-1.31355		110.029	116.24	117.869	128.596	125.827	126.319	134.369	142.007	119.186	111.233	112.427	117.246	121.433	125.359	124.143	132.058	107.349	111.405	111.58	115.406	124.804	124.874	130.03	122.727				-1.31355	112.188	3.58334	3	112.96	1.64117	3	113.959	1.97046	3	120.416	4.12432	3	124.021	1.32714	3	125.517	0.424557	3	129.514
56	-1.27007		111.079	114.987	115.716	127.26	125.261	126.406	130.571	138.131	114.25	111.685	113.269	117.459	121.02	123.635	125.31	128.159	107.601	111.657	111.044	117.451	125.118	122.206	129.805	122.872				-1.27007	110.977	1.92037	3	112.776	1.1054	3	113.343	1.34912	3	120.723	3.2683	3	123.8	1.39047	3	124.082	1.23277	3	128.562
57	-1.2263		109.2	115.115	115.884	126.947	126.618	123.797	136.629	139.758	111.845	109.425	113.592	118.879	123.501	125.287	128.738	127.437	107.224	111.09	111.446	115.065	127.473	123.648	128.228	121.14				-1.2263	109.423	1.33859	3	111.877	1.68893	3	113.641	1.28134	3	120.297	3.50266	3	125.864	1.20686	3	124.244	0.523351	3	131.198
58	-1.18282		108.077	114.936	115.8	125.611	124.47	126.145	131.513	139.516	107.341	110.587	112.816	117.885	117.643	123.276	124.945	124.332	104.46	111.972	111.513	115.337	125.746	123.288	129.58	120.707				-1.18282	106.626	1.10374	3	112.499	1.28262	3	113.376	1.26891	3	119.611	3.0888	3	122.62	2.51541	3	124.236	0.954373	3	128.679
59	-1.13907		109.517	118.389	115.828	123.764	124.781	124.841	130.383	139.585	108.328	109.296	111.521	118.382	118.539	122.557	125.31	124.621	105.528	112.791	113.655	116.087	125.196	120.548	128.078	120.418				-1.13907	107.791	1.18251	3	113.492	2.64803	3	113.668	1.24325	3	119.411	2.27488	3	122.839	2.15324	3	122.649	1.24003	3	127.924
60	-1.09558		105.442	112.251	113.087	122.456	123.509	123.855	132.203	137.301	106.539	110.265	111.78	115.898	116.954	123.635	125.529	127.292	107.915	115.438	111.379	116.224	123.705	122.783	128.003	120.924				-1.09558	106.632	0.715366	3	112.651	1.50674	3	112.082	0.515781	3	118.192	2.13381	3	121.389	2.21852	3	123.424	0.326928	3	128.578
61	-1.0521		104.417	114.885	112.556	123.366	122.012	124.986	131.419	139.516	106.107	111.75	111.65	117.388	117.161	121.983	128.665	130.181	106.595	116.383	111.111	115.542	122.135	127.758	128.003	122.655				-1.0521	105.707	0.660087	3	114.339	1.36515	3	111.772	0.421515	3	118.765	2.36109	3	120.436	1.638	3	124.909	1.66754	3	129.362
62	-1.0086		103.709	113.018	112.164	121.461	124.329	123.188	128.908	140	108.452	112.137	111.068	114.123	118.057	122.845	125.164	131.697	104.837	114.997	112.048	114.656	123.783	121.197	126.051	118.543				-1.0086	105.666	1.43043	3	113.384	0.845617	3	111.76	0.347722	3	116.747	2.36215	3	122.056	2.00607	3	122.41	0.614656	3	126.708
63	-0.965117		107.54	112.558	118.261	122.911	122.125	120.899	128.782	139.135	107.526	111.362	112.557	114.975	122.467	120.474	123.122	132.491	105.214	115.69	112.115	115.746	120.879	121.125	127.327	121.501				-0.965117	106.76	0.773227	3	113.203	1.29037	3	114.311	1.97902	3	117.877	2.52646	3	121.824	0.482565	3	120.832	0.190701	3	126.41
64	-0.921367		103.343	115.345	117.03	120.324	122.238	120.232	130.446	136.886	106.292	107.747	109.709	112.775	122.605	124.21	122.611	134.874	103.706	117.328	110.91	115.474	121.978	119.034	126.877	120.563				-0.921367	104.447	0.928545	3	113.474	2.91996	3	112.55	2.26693	3	116.191	2.20851	3	122.274	0.181909	3	121.159	1.56434	3	126.645
65	-0.877883		105.905	113.964	114.262	120.949	122.718	121.159	130.603	136.92	105.305	105.875	109.126	114.336	121.985	118.534	120.204	135.596	106.595	114.997	112.316	114.928	121.821	121.702	126.051	120.851				-0.877883	105.935	0.372724	3	111.612	2.88401	3	111.901	1.49692	3	116.738	2.11259	3	122.175	0.275882	3	120.465	0.977919	3	125.619
66	-0.834133		106.857	112.941	113.898	121.063	122.068	119.391	127.966	137.474	105.676	107.747	109.838	112.775	116.54	120.043	120.934	141.877	109.548	114.871	109.505	116.292	118.838	123.576	124.024	124.026				-0.834133	107.36	1.14576	3	111.853	2.12726	3	111.08	1.4122	3	116.71	2.40169	3	119.149	1.60337	3	121.004	1.29999	3	124.308
67	-0.790633		105.173	112.046	114.234	118.476	122.379	120.58	127.621	138.304	103.763	107.811	110.162	112.349	114.059	119.181	122.028	139.856	105.653	117.832	110.977	115.474	120.565	120.836	127.928	121.212				-0.790633	104.863	0.567251	3	112.563	2.90432	3	111.791	1.24391	3	115.433	1.76889	3	119.001	2.52583	3	120.199	0.514362	3	125.859
68	-0.7469		104.514	111.995	113.003	119.016	121.503	119.884	127.903	137.924	121.468	105.81	106.343	111.994	116.196	119.325	121.371	137.617	107.286	116.194	111.312	116.292	119.78	120.62	122.973	120.346				-0.7469	111.09	5.2506	3	111.333	3.01578	3	110.219	1.99878	3	115.768	2.04401	3	119.16	1.56324	3	119.943	0.375076	3	124.083
69	-0.7034		106.369	112.225	116.135	117.965	123.679	119.826	128.249	136.401	104.195	106.133	109.126	112.136	117.229	118.319	123.851	132.996	104.523	116.887	110.71	114.724	118.21	122.134	125.826	122.15				-0.7034	105.029	0.676728	3	111.748	3.11361	3	111.99	2.12228	3	114.942	1.68606	3	119.706	2.00643	3	120.093	1.10938	3	125.975
70	0		100	100	100	100	100	100	100	100	100	100	100	100	100	100	100	100	100	100	100	100	100	100	100	100				0	100	0	3	100	0	3	100	0	3	100	0	3	100	0	3	100	0	3	100
71	0.0436167		98.7311	98.798	95.6655	98.4082	98.9828	96.5217	95.6685	97.128	96.5453	100.839	98.6408	99.1483	98.9662	100.144	96.4989	95.1625	96.5452	98.4247	98.3266	99.1138	100.078	95.5299	97.3724	98.3405				0.0436167	97.2739	0.728602	3	99.354	0.750434	3	97.5443	0.943754	3	98.8901	0.241171	3	99.3425	0.368033	3	97.3985	1.40217	3	96.5133
72	0.0871		99.2923	98.4399	96.84	97.8965	98.8132	94.4928	93.6598	94.1522	97.5941	96.5139	96.6343	97.0192	95.8649	97.5575	95.186	93.574	100.565	98.4877	96.921	97.8868	96.3893	95.6741	95.4204	94.0837				0.0871	99.1506	0.860641	3	97.8138	0.650122	3	96.7985	0.0853408	3	97.6008	0.290855	3	97.0225	0.908074	3	95.9081	0.892411	3	94.7554
73	0.130583		97.4622	96.9821	94.6309	95.9068	95.6767	92.1159	91.0232	93.2872	99.3214	96.9012	96.246	96.8772	94.8312	98.0603	91.2473	90.5415	97.7387	101.575	97.1218	95.501	97.5667	95.6741	96.0961	94.228				0.130583	98.1741	0.579185	3	98.4862	1.54472	3	95.9995	0.729553	3	96.095	0.408271	3	96.0249	0.808647	3	95.2835	1.72708	3	92.7889
74	0.174333		97.8282	97.6471	93.2606	94.0023	95.1399	87.8261	89.1714	91.6955	104.627	96.4493	95.9223	95.5287	93.5906	94.181	88.9132	88.4477	97.1734	97.6055	96.1178	95.4329	94.584	94.1601	92.5676	92.4242				0.174333	99.8761	2.38285	3	97.234	0.392511	3	95.1003	0.921541	3	94.988	0.49362	3	94.4382	0.453132	3	92.0557	2.11483	3	90.2174
75	0.217817		95.2904	97.5192	92.9251	93.1211	94.2922	87.3623	86.3779	90.7958	107.403	96.5139	94.3689	95.8126	92.2812	93.5345	88.9132	88.3755	97.1106	100	96.8541	94.2059	92.5432	95.3857	93.3934	91.9913				0.217817	99.9346	3.7709	3	98.011	1.03597	3	94.716	1.14741	3	94.3799	0.781836	3	93.0388	0.63121	3	92.0942	2.42553	3	89.5615
76	0.261567		96.8033	96.1637	92.3658	92.2968	91.6926	85.7391	87.5078	90.7266	94.5713	96.3202	95.0162	95.9546	92.1433	93.75	87.7462	87.7978	97.299	96.1563	94.8461	94.7512	91.9152	89.4016	90.5405	90.9812				0.261567	96.2245	0.838928	3	96.2134	0.0534545	3	94.076	0.856524	3	94.3342	1.07631	3	91.9171	0.130132	3	89.6302	2.31536	3	88.5982
77	0.305067		97.2182	95.9079	92.3658	91.8135	91.9186	85.3623	85.8443	89.1349	95.9901	95.9974	92.5566	92.8318	90.0758	91.523	86.5062	82.3105	95.5402	98.4877	95.917	95.092	89.7174	91.2761	88.1381	88.5281				0.305067	96.2495	0.501445	3	96.7977	0.845406	3	93.6131	1.15325	3	93.2458	0.96879	3	90.5706	0.681894	3	89.3872	2.01368	3	86.8296
78	0.3488		94.2411	94.8593	90.8277	90.6197	91.2687	81.913	85.1224	87.6125	106.786	94.3835	91.1974	92.406	88.7664	91.5948	86.0686	84.1877	95.6658	98.2987	94.0428	94.2059	89.5604	91.9971	87.012	87.8066				0.3488	98.8976	3.96553	3	95.8472	1.23343	3	92.0227	1.01571	3	92.4105	1.03525	3	89.8652	0.738261	3	88.5017	3.29636	3	86.0677
79	0.3923		94.6315	95.6777	90.2125	91.1882	90.3363	83.1014	80.2888	87.4394	96.422	93.4797	90.6149	92.193	87.6637	88.2184	83.4427	82.2383	98.1156	97.4795	95.6493	91.2747	91.2088	88.5364	87.5375	87.2294				0.3923	96.3897	1.00589	3	95.5456	1.15655	3	92.1589	1.74904	3	91.552	0.321504	3	89.7362	1.06645	3	86.6188	1.76104	3	83.7563
80	0.43605		94.9732	95.3708	88.9821	89.4542	91.9751	82.7246	83.1764	84.9481	96.0518	93.0923	90.356	91.4123	86.3542	88.1466	84.5368	81.8773	97.299	96.5974	94.1767	91.5474	87.5196	88.3922	88.0631	87.1573				0.43605	96.108	0.671996	3	95.0202	1.02689	3	91.1716	1.55402	3	90.8047	0.676333	3	88.6163	1.71276	3	86.4211	1.84961	3	85.2588
81	0.479817		93.6554	95.5499	89.2617	89.4542	89.1777	78.6957	80.4457	82.8028	109.254	92.9632	90.4854	92.264	86.4232	86.9971	81.4734	78.7004	97.299	99.4959	96.8541	91.8882	90.5808	88.3922	84.5345	84.4877				0.479817	100.069	4.71101	3	96.003	1.89939	3	92.2004	2.35349	3	91.2022	0.880666	3	88.7272	1.22117	3	84.695	3.02659	3	82.1512
82	0.523283		93.8995	95.7545	90.3803	90.3923	87.8214	79.6232	78.3427	81.9031	94.6946	93.0923	91.4563	90.1348	84.3556	86.6379	81.8381	79.0614	98.3668	96.9754	93.909	92.5017	86.5777	85.7967	84.6847	84.8485				0.523283	95.6536	1.37588	3	95.2741	1.1464	3	91.9152	1.04416	3	91.0096	0.749738	3	86.2516	1.01369	3	84.0193	2.21141	3	81.6218
83	0.566783		93.631	94.7826	89.5414	87.5497	86.8324	78.4638	79.3158	80.7612	94.9414	92.5113	88.932	88.9993	84.5624	86.3506	79.4311	81.8773	96.3568	96.4083	94.6452	92.0927	86.2637	85.4362	84.5345	85.7864				0.566783	94.9764	0.787048	3	94.5674	1.13011	3	91.0396	1.81141	3	89.5472	1.33976	3	85.8862	0.681962	3	83.4168	2.49056	3	81.0938
84	0.610533		94.7779	95.1662	90.7998	89.8238	86.1825	79.0725	75.9887	79.308	93.7693	91.4784	88.1553	87.3669	84.838	84.1236	78.0452	79.9278	98.4925	97.2275	94.2436	90.2522	86.1852	83.9942	82.4324	84.4156				0.610533	95.6799	1.43611	3	94.624	1.68162	3	91.0663	1.76258	3	89.1476	0.898903	3	85.7353	0.448617	3	82.3967	1.66256	3	78.8221
85	0.654017		94.5339	93.8619	89.6253	88.5731	84.2893	77.5072	76.334	78.9965	96.2369	93.6088	85.6958	89.2122	82.2881	80.9626	77.6805	79.4946	97.6131	94.4549	94.7791	88.6844	85.6358	83.85	83.033	81.9625				0.654017	96.128	0.890541	3	93.9752	0.250753	3	90.0334	2.63006	3	88.8232	0.197134	3	84.0711	0.972544	3	80.7733	1.83345	3	79.0158
86	0.697767		92.9234	93.0179	87.1924	85.9295	83.922	74.2319	74.6704	76.6436	96.1135	92.8341	85.3722	87.0121	80.4273	81.3218	77.7535	82.2383	95.0377	95.4631	95.0469	88.9571	84.0659	82.6244	81.1562	83.4776				0.697767	94.6915	0.937035	3	93.7717	0.847378	3	89.2038	2.9684	3	87.2995	0.885719	3	82.8051	1.18962	3	79.3927	2.60766	3	77.86
87	0.741517		94.3143	92.9668	87.4441	86.8675	84.7697	74.9855	73.0383	75.3979	93.029	92.1885	85.2427	87.3669	81.53	82.6868	77.3158	77.9061	95.603	94.518	93.2396	88.7526	84.1444	85.0757	80.2553	81.9625				0.741517	94.3154	0.743059	3	93.2244	0.684684	3	88.6421	2.38496	3	87.6623	0.563849	3	83.4814	0.992253	3	80.916	3.04438	3	76.8698
88	0.785		93.2162	93.7084	87.8635	84.5082	82.9048	75.6812	73.3522	75.5709	92.3504	90.8974	85.3722	86.0894	80.8408	78.8793	76.0759	77.1841	95.4146	95.3371	92.1017	88.6844	85.8713	84.2105	80.03	80.3752				0.785	93.6604	0.912006	3	93.3143	1.29671	3	88.4458	1.96435	3	86.4274	1.21733	3	83.2056	1.45994	3	79.5903	2.48775	3	76.486
89	0.8285		93.5822	93.1969	86.689	83.8829	83.6112	74.2609	71.5003	73.6678	93.3374	90.3809	85.5663	85.5216	79.3935	79.5977	75.3465	74.8736	95.7915	93.6988	91.3655	86.2986	81.7111	80.894	79.0541	80.5195				0.8285	94.237	0.780411	3	92.4255	1.03254	3	87.8736	1.77575	3	85.2344	0.711987	3	81.572	1.21952	3	78.2509	2.02979	3	75.3003
90	0.87225		92.4841	94.1176	85.934	84.8493	81.8875	74.5507	71.9083	73.0796	92.7205	91.3493	84.6602	85.0958	78.4976	78.5201	73.9606	74.8736	96.8593	96.5343	92.905	88.7526	81.4757	79.1637	79.3544	79.4372				0.87225	94.0213	1.42063	3	94.0004	1.49795	3	87.833	2.56247	3	86.2326	1.262	3	80.6203	1.06798	3	77.4115	1.4424	3	75.0744
91	0.915733		93.1186	92.3785	85.7103	84.1671	80.5877	74.3768	71.4062	72.2837	92.2887	90.1872	84.2718	83.8893	78.5665	78.3046	73.9606	74.5848	95.5402	93.7618	91.6332	85.6169	81.9466	79.8125	79.4294	79.4372				0.915733	93.6492	0.975394	3	92.1092	1.04065	3	87.2051	2.25265	3	84.5578	0.535607	3	80.367	0.981978	3	77.498	1.62016	3	74.9321
92	0.959483		92.1425	92.7877	86.4374	83.1438	81.0964	72.9565	70.904	72.4913	96.422	87.9923	83.3657	83.8893	76.6368	76.5086	73.0853	73.3574	93.593	93.5728	91.4993	86.5031	80.3768	78.3706	77.1772	77.9221				0.959483	94.0525	1.25655	3	91.4509	1.74412	3	87.1008	2.37129	3	84.5121	1.0185	3	79.37	1.38228	3	75.9452	1.58809	3	73.7222
93	1.00323		91.1176	93.1202	84.9832	82.888	80.3052	71.4493	69.1777	69.7578	91.3017	89.0252	82.5243	83.3215	78.7733	75.1437	71.8454	71.1913	95.9799	93.4468	93.842	85.1397	81.3187	78.8032	77.7778	77.7778				1.00323	92.7997	1.59097	3	91.864	1.42256	3	87.1165	3.43686	3	83.7831	0.689777	3	80.1324	0.739862	3	75.132	2.12289	3	72.9336
94	1.04672		92.8258	91.8414	84.368	83.4565	80.4747	71.3913	69.3032	69.5502	92.4121	90.3163	82.3301	84.3861	76.5679	73.4195	70.4595	76.3177	97.1106	93.1317	90.0268	86.3667	80.0628	78.5148	75.6757	76.6234				1.04672	94.1161	1.50196	3	91.7632	0.813669	3	85.575	2.30233	3	84.7364	0.858177	3	79.0351	1.23934	3	74.4419	2.11895	3	71.8128
95	1.09022		92.6061	92.7366	82.8579	81.4952	79.0901	71.7681	68.8638	69.2734	90.2529	87.2176	81.5534	83.3925	76.0165	75.5029	70.6783	73.4296	94.1583	92.8166	91.0977	85.4806	79.6703	76.2076	74.7748	76.6955				1.09022	92.3391	1.13526	3	90.9236	1.85316	3	85.1697	2.98784	3	83.4561	1.15093	3	78.259	1.13367	3	74.4929	1.37749	3	71.439
96	1.13397		91.0444	90.5371	84.4519	79.9602	78.4968	71.7681	68.2988	68.6159	90.8081	88.7669	81.2945	82.3989	75.5341	75.7902	70.5325	75.9567	93.9698	92.9427	89.4913	85.0716	77.551	79.0916	74.9249	76.7677				1.13397	91.9408	1.01682	3	90.7489	1.21007	3	85.0792	2.38691	3	82.4769	1.47604	3	77.194	0.873676	3	75.55	2.11751	3	71.2521
97	1.17768		92.7038	91.3299	82.3546	80.9835	77.6773	70.1449	65.8506	67.4048	92.1036	88.0568	80.8414	82.3279	75.672	73.8506	70.2407	75.5235	95.4774	94.2029	90.3614	84.0491	77.9435	78.1543	75	76.6955				1.17768	93.4283	1.03911	3	91.1965	1.77548	3	84.5192	2.95363	3	82.4535	0.887179	3	77.0976	0.716946	3	74.0499	2.31425	3	70.3638
98	1.22118		92.0205	90.1279	83.6409	79.9318	76.1797	68.9565	65.4426	65.4325	90.6231	87.2821	82.4595	82.5408	75.3274	73.6351	68.8549	72.13	95.3518	94.518	90.0937	84.1854	77.7865	74.9099	73.6486	76.4069				1.22118	92.6651	1.40259	3	90.6427	2.10461	3	85.3981	2.37246	3	82.2193	1.23839	3	76.4312	0.720942	3	72.5005	1.80979	3	69.3154
99	1.26492		90.8492	89.7954	83.3613	80.5287	78.0164	67.8551	64.7834	66.609	91.1783	86.4429	81.8123	82.115	74.6382	72.4138	67.5419	72.0578	94.5352	94.1399	90.2276	83.2311	78.179	74.7657	73.048	74.8918				1.26492	92.1876	1.17765	3	90.1261	2.22808	3	85.1337	2.58588	3	81.9583	0.784033	3	76.9445	1.15412	3	71.6782	2.02854	3	68.4578
100	1.30867		89.4827	90.844	81.4877	78.1694	76.6036	68.6377	65.0031	65.7093	90.9315	88.1214	80.9061	80.1278	74.3625	71.4799	67.8337	70.8303	93.9698	93.6988	88.1526	83.7764	81.3187	74.1168	72.2222	74.8918				1.30867	91.4613	1.32215	3	90.8881	1.61022	3	83.5155	2.32463	3	80.6912	1.64294	3	77.4283	2.04997	3	71.4115	1.58206	3	68.353
101	1.35217		90.7028	89.5908	81.1521	78.8232	76.321	67.7391	64.1557	65.3633	88.7724	86.572	81.877	79.489	73.8112	72.773	67.5419	70.4693	94.4095	97.0384	90.1606	82.6858	74.9608	74.7657	73.1982	71.645				1.35217	91.2949	1.65403	3	91.0671	3.11027	3	84.3966	2.88961	3	80.3326	1.19215	3	75.031	0.725376	3	71.7593	2.09076	3	68.2986
102	1.39592		90.532	90	81.1801	78.8516	75.9819	67.5942	63.4338	65.6401	90.3146	86.3138	79.9353	80.5536	72.5706	71.1925	66.5208	67.9422	94.1583	96.1563	88.4203	82.4131	75.5887	74.6215	71.6216	73.5209				1.39592	91.6683	1.24658	3	90.8233	2.87096	3	83.1786	2.64541	3	80.6061	1.02844	3	74.7138	1.07755	3	71.1361	2.0288	3	67.1921
103	1.4394		90.7516	89.5652	79.7819	79.2211	75.7841	66.2609	62.7746	63.4256	91.7335	85.9264	79.3528	79.7729	71.8815	70.1868	66.6667	66.8592	94.0955	96.0933	89.759	84.3899	75.5102	72.6027	69.7447	73.8817				1.4394	92.1935	0.992323	3	90.5283	2.97416	3	82.9646	3.3995	3	81.128	1.63872	3	74.3919	1.25772	3	69.6835	1.84796	3	66.3953
104	1.48315		89.9707	89.7187	81.5157	77.6293	75.3603	66.8116	63.2454	62.2837	91.7952	87.0884	79.6764	80.4826	72.9841	70.977	65.3538	67.4368	93.6558	95.7782	89.3574	83.6401	75.3532	72.2422	70.1201	72.9437				1.48315	91.8072	1.0638	3	90.8618	2.57281	3	83.5165	2.96834	3	80.584	1.73589	3	74.5659	0.790868	3	70.0103	1.64052	3	66.2398
105	1.5269		89.8487	89.1049	80.2852	79.8749	74.7386	65.6812	61.8016	62.7336	91.9186	86.6365	77.9288	78.8502	72.6396	69.4684	66.4478	69.3141	94.4095	95.1481	89.5582	81.5269	74.0973	71.8818	69.8949	73.5209				1.5269	92.0589	1.31847	3	90.2965	2.52828	3	82.5908	3.54953	3	80.084	0.779732	3	73.8252	0.621041	3	69.0104	1.80455	3	66.0481
106	1.5704		91.0444	87.954	80.6208	77.1461	73.1563	65.971	61.3308	62.1107	90.4997	87.0884	77.3463	79.6309	72.3639	71.408	65.6455	70.8303	93.593	94.707	88.1526	81.5269	74.3328	72.026	70.7958	73.4488				1.5704	91.7124	0.953361	3	89.9165	2.40826	3	82.0399	3.1992	3	79.4347	1.26844	3	73.2843	0.571973	3	69.8017	1.92362	3	65.924
107	1.61388		90.5076	88.3632	79.5022	78.141	73.2975	65.2464	60.8914	61.0727	88.8957	86.5074	79.5469	79.9858	71.9504	70.4023	63.6761	69.4585	93.0905	98.1727	89.0228	82.1404	72.8414	71.6655	68.018	71.7172				1.61388	90.8312	1.22168	3	91.0144	3.61899	3	82.6906	3.16608	3	80.0891	1.15569	3	72.6965	0.395591	3	69.1047	1.96333	3	64.1952
108	1.65762		90.6296	89.6675	78.8591	77.6578	74.1452	66.6957	59.6987	60	91.0549	86.3783	80.1294	78.1405	73.0531	67.3132	63.6761	70.6859	94.6608	99.3069	88.2865	80.5044	72.5275	71.2329	67.8679	70.9957				1.65762	92.1151	1.27876	3	91.7842	3.87932	3	82.425	2.9536	3	78.7676	0.87954	3	73.2419	0.476461	3	68.4139	1.42071	3	63.7476
109	1.70112		90.4344	88.491	77.9083	76.0659	73.0432	65.2754	60.452	60.4844	89.8828	84.8289	79.288	78.9922	73.8801	68.4626	63.6032	68.4477	92.7136	98.9918	87.6171	81.3224	72.2135	70.7282	69.0691	69.5527				1.70112	91.0102	0.866421	3	90.7706	4.24437	3	81.6045	3.0326	3	78.7935	1.52066	3	73.0456	0.481102	3	68.1554	1.58157	3	64.3748
110	1.74487		89.0434	88.8491	78.7472	74.6447	72.7324	62.9275	60.2637	59.6886	90.8698	84.958	77.3463	77.0759	69.1937	67.3851	63.0197	69.6029	94.0327	97.6686	86.4793	79.6864	72.9984	70.8003	69.7447	70.0577				1.74487	91.3153	1.45739	3	90.4919	3.76003	3	80.8576	2.83978	3	77.1357	1.45573	3	71.6415	1.22633	3	67.0376	2.2793	3	64.3427
111	1.78835		88.2382	89.8977	77.7964	76.0375	71.5174	63.8261	59.0082	58.9619	90.6848	84.5707	76.1812	77.2179	68.3666	67.0977	62.9468	68.4477	93.9698	97.2905	86.0107	79.4819	72.292	70.5119	68.2432	71.14				1.78835	90.9643	1.66049	3	90.5863	3.688	3	79.9961	3.04323	3	77.5791	1.01059	3	70.7253	1.20036	3	67.1452	1.93017	3	63.3994
112	1.8321		89.2143	88.5934	78.943	76.2649	71.4326	62.5217	57.5957	57.5087	91.1783	84.377	77.6052	76.5791	67.6085	67.6006	61.7797	67.4368	90.3894	95.4001	87.0147	79.2093	70.4867	71.0887	66.5916	69.697				1.8321	90.2607	0.570615	3	89.4568	3.21125	3	81.1876	2.93904	3	77.3511	0.933499	3	69.8426	1.14992	3	67.0703	2.48723	3	61.989
113	1.87587		89.141	88.9258	78.9709	76.3502	71.4044	63.8551	57.4702	57.474	89.2659	83.2795	75.8576	78.1405	69.745	66.6667	61.5609	67.4368	93.7814	97.4795	88.5542	79.7546	72.606	68.0606	65.9159	71.2121				1.87587	90.7294	1.52641	3	89.895	4.12772	3	81.1276	3.82053	3	78.0818	0.983205	3	71.2518	0.829407	3	66.1941	1.2368	3	61.649
114	1.91935		90.4344	88.2097	77.9642	75.8954	70.5284	63.0145	58.2863	57.3702	89.0808	84.2479	75.5987	75.4436	67.5396	65.9483	62.5821	65.9206	91.9598	98.7398	87.5502	77.3006	70.0942	68.7815	66.2162	68.3983				1.91935	90.4917	0.831586	3	90.3991	4.3243	3	80.371	3.65395	3	76.2132	0.559132	3	69.3874	0.932352	3	65.9148	1.66489	3	62.3615
115	1.96283		89.4095	87.954	76.8456	74.5878	70.8675	61.8841	56.403	57.0588	90.8698	83.9897	78.123	75.3016	67.4018	65.7328	59.8104	64.4043	92.3367	96.2823	87.0147	78.3231	70.3297	68.0606	65.7658	69.9856				1.96283	90.872	0.845013	3	89.4086	3.62235	3	80.6611	3.19813	3	76.0709	1.14482	3	69.533	1.07685	3	65.2258	1.80093	3	60.6597
116	2.00658		88.531	88.3632	78.3837	73.1381	69.0873	59.8551	56.3089	56.0554	89.3276	83.6669	75.9223	74.9468	66.9883	66.954	60.3209	67.509	93.4045	95.2741	85.9438	77.6414	70.0942	67.7001	64.7898	68.1818				2.00658	90.421	1.50937	3	89.1014	3.37098	3	80.0833	3.01517	3	75.2421	1.30835	3	68.7233	0.91489	3	64.8364	2.49995	3	60.4732
117	2.05007		88.8482	88.7212	76.9295	74.4457	68.8895	61.1884	56.4972	56.2284	89.7594	83.9251	76.0518	74.5209	67.195	64.1523	59.6645	64.9819	92.6508	97.1014	84.2035	77.3006	70.1727	66.8349	66.2913	69.6248				2.05007	90.4195	1.14623	3	89.9159	3.8503	3	79.0616	2.5834	3	75.4224	0.939346	3	68.7524	0.8623	3	64.0585	1.63068	3	60.8177
118	2.09382		88.7994	87.8261	76.3702	72.6549	68.946	60.3188	55.4928	55.6401	89.636	81.601	75.5987	75.2307	67.7464	64.1523	60.5398	65.8484	92.902	95.7782	84.9398	76.8234	72.606	66.5465	64.039	68.9755				2.09382	90.4458	1.25162	3	88.4018	4.10271	3	78.9696	2.99339	3	74.903	1.21445	3	69.7661	1.46154	3	63.6725	1.8137	3	60.0239
119	2.13732		88.3114	86.5473	76.2304	72.5128	68.5222	59.5362	54.5198	54.7751	90.8081	83.0213	77.5405	76.4372	65.2653	65.6609	58.8621	64.8375	91.0804	95.4001	85.8099	76.9598	69.7017	66.4023	65.015	67.7489				2.13732	90.0666	0.881146	3	88.3229	3.68209	3	79.8603	2.99876	3	75.3033	1.40336	3	67.8297	1.32665	3	63.8665	2.17568	3	59.4656
120	2.18105		89.2143	87.468	76.1465	72.9676	68.5504	58.9275	54.4256	54.4291	89.9445	82.2466	74.3689	75.4436	64.5072	64.5115	58.8621	62.5271	92.2739	94.0139	86.5462	76.5508	67.2684	66.3302	63.5886	68.1097				2.18105	90.4775	0.922574	3	87.9095	3.40408	3	79.0205	3.79765	3	74.9873	1.05923	3	66.7754	1.19292	3	63.2564	2.2272	3	58.9588
121	2.22455		88.2626	87.5192	74.9441	73.3655	68.3809	58.9275	53.1387	55.2595	104.503	82.9567	76.3754	74.9468	64.3005	64.3678	59.5186	63.0325	91.897	95.5261	86.2115	76.1418	68.0534	65.8976	63.5135	68.0375				2.22455	94.8876	4.92102	3	88.6674	3.67361	3	79.177	3.54144	3	74.818	0.804012	3	66.9116	1.30897	3	63.0643	2.11501	3	58.7236
122	2.27402		90.2147	88.0563	75.6991	71.7453	66.6572	57.6522	52.6365	53.5986	91.9803	83.0859	74.2395	75.0177	63.7491	64.0086	57.9869	63.8989	92.4623	95.2111	84.4712	76.4145	67.9749	67.1233	63.8138	67.6046				2.27402	91.5524	0.683171	3	88.7844	3.51914	3	78.1366	3.19521	3	74.3925	1.38364	3	66.1271	1.24834	3	62.928	2.78695	3	58.1457
123	2.34068		89.7267	86.4194	75.2796	71.0063	66.4312	58.2319	53.5154	53.6332	91.7952	83.5378	74.11	73.8112	65.0586	62.6437	58.7163	63.1769	91.3317	95.2741	85.6091	77.3688	69.6232	64.672	62.7628	67.1717				2.34068	90.9512	0.626694	3	88.4104	3.53121	3	78.3329	3.65372	3	74.0621	1.84098	3	67.0377	1.35214	3	61.8492	1.90106	3	58.3315
124	2.40737		88.9458	86.1893	75.2796	70.3809	66.6855	57.6232	52.9818	51.7647	91.3634	82.5048	74.1748	74.8758	64.1626	62.8592	58.2057	63.8267	92.3367	94.833	84.4712	75.6646	67.1115	66.2581	64.1141	67.2439				2.40737	90.882	1.00801	3	87.8424	3.65356	3	77.9752	3.26363	3	73.6404	1.6456	3	65.9865	0.920196	3	62.2468	2.51142	3	58.4339
125	2.47403		89.1898	85.9079	74.5805	69.6987	67.844	56.4638	52.3227	51.2457	91.8569	81.2782	73.1392	73.5273	65.8167	62.5718	57.7681	65.2708	91.3317	92.8166	85.2075	74.0286	66.6405	64.1673	64.5646	66.5224				2.47403	90.7928	0.815688	3	86.6676	3.35244	3	77.6424	3.80537	3	72.4182	1.36744	3	66.7671	0.588654	3	61.0676	2.34755	3	58.2184
126	2.54095		89.7999	86.8286	74.1051	70.7504	65.6118	56.7246	51.4752	50.519	90.2529	81.9884	73.7217	74.0951	64.4383	61.6379	57.0387	63.9711	92.5879	93.3837	85.0067	75.3238	66.1695	64.5999	62.3123	67.1717				2.54095	90.8803	0.863799	3	87.4003	3.30195	3	77.6112	3.69941	3	73.3898	1.36651	3	65.4065	0.510185	3	60.9875	2.29653	3	56.9421
127	2.60753		87.5549	86.3939	72.7069	68.5617	65.1314	55.5652	50.8475	51.2803	89.2659	83.9897	73.9159	73.3144	63.9559	62.4282	57.6951	64.4043	91.7085	95.5261	83.8688	75.7328	66.0126	63.5184	62.6126	66.1616				2.60753	89.5098	1.20524	3	88.6366	3.51401	3	76.8305	3.5364	3	72.5363	2.10636	3	65.0333	0.595733	3	60.5039	2.48933	3	57.0517
128	2.6742		89.2143	86.8798	73.2662	68.7322	63.6903	54.8116	50.0942	50.173	89.5126	83.0213	73.9806	75.0177	64.2316	61.4224	56.2363	63.6101	90.9548	95.4001	84.4712	74.6421	65.3061	63.23	61.5616	65.2958				2.6742	89.8939	0.537389	3	88.4337	3.65695	3	77.2393	3.62182	3	72.7974	2.03546	3	64.4093	0.474838	3	59.8213	2.55864	3	55.964
129	2.74087		88.9458	87.4425	73.8255	69.2439	64.0011	55.1304	49.435	49.6886	91.9803	81.6656	73.657	73.3854	62.9221	59.5546	56.2363	63.8267	91.0176	93.2577	83.8688	73.8241	65.2276	63.3742	61.2613	67.1717				2.74087	90.6479	0.895256	3	87.4553	3.34637	3	77.1171	3.37621	3	72.1511	1.45913	3	64.0503	0.665997	3	59.3531	2.3819	3	55.6442
130	2.80753		88.9946	86.0358	73.8535	66.8846	62.9556	53.3043	49.2467	49.1696	90.6848	84.958	73.7864	73.1725	62.6465	61.2069	56.3822	62.1661	92.7136	93.6358	83.8019	74.3013	66.4835	63.3021	60.2853	66.3781				2.80753	90.7977	1.07505	3	88.2099	2.73074	3	77.1472	3.32737	3	71.4528	2.30723	3	64.0285	1.23073	3	59.2711	3.04407	3	55.3047
131	2.8742		88.7506	86.9565	72.9866	68.1353	62.5883	53.942	48.5876	47.3702	89.5126	82.634	73.3333	73.5983	63.1978	61.8534	55.5069	60.2888	92.4623	94.0139	84.2035	74.0286	66.6405	62.6532	60.2853	66.5224				2.8742	90.2419	1.13181	3	87.8681	3.31656	3	76.8411	3.68254	3	71.9207	1.89679	3	64.1422	1.26148	3	59.4829	2.78004	3	54.7933
132	2.94087		88.897	87.0077	71.896	66.4298	62.5318	53.913	48.619	47.8547	89.8828	78.7605	73.0097	72.6757	62.6465	60.5603	55.6528	60.1444	92.1482	95.6522	82.0616	74.9148	64.7567	62.0764	60.7357	66.811				2.94087	90.3093	0.962475	3	87.1401	4.87666	3	75.6558	3.21901	3	71.3401	2.53881	3	63.3116	0.723274	3	58.8499	2.50694	3	55.0025
133	3.00753		88.4578	85.5499	72.7629	66.913	61.8254	52.4928	47.7715	47.6817	88.649	81.9884	72.4919	71.3982	61.6127	61.4224	55.9446	60	92.3367	93.5098	83.668	73.8241	64.2857	61.4275	61.2613	64.8629				3.00753	89.8145	1.26231	3	87.016	3.40577	3	76.3076	3.68104	3	70.7118	2.02437	3	62.5746	0.857762	3	58.4476	2.97741	3	54.9924
134	3.0742		88.3114	86.0614	72.3714	67.3962	62.2492	52.6957	47.1438	47.301	89.9445	82.7631	71.9094	72.2498	61.7505	59.7701	54.8505	60.5054	89.8869	92.8796	83.5341	74.4376	67.19	62.2927	61.7868	66.0895				3.0742	89.3809	0.535036	3	87.2347	2.97875	3	75.9383	3.80026	3	71.3612	2.08066	3	63.7299	1.73601	3	58.2528	2.87243	3	54.5937
135	3.14087		88.4822	86.2404	70.4978	66.4582	61.6276	51.3333	46.516	46.3668	89.6977	80.2453	72.8803	73.9532	62.6465	60.3448	54.6317	57.4007	92.3367	91.3043	82.9317	73.4833	65.6201	61.8601	60.2102	63.4199				3.14087	90.1722	1.13771	3	85.93	3.19624	3	75.4366	3.81016	3	71.2982	2.4238	3	63.298	1.1977	3	57.8461	3.28563	3	53.786
136	3.20753		86.7984	86.0358	72.1477	64.7527	61.7971	51.3913	46.3277	45.2595	89.5743	80.5036	72.4272	72.6047	62.164	59.842	54.4128	57.7617	91.1432	93.5098	82.5301	73.0061	63.8148	62.2206	59.8348	64.9351				3.20753	89.172	1.27026	3	86.683	3.76849	3	75.7017	3.41519	3	70.1212	2.68674	3	62.592	0.620503	3	57.818	3.28588	3	53.5251
137	3.2742		88.409	86.0358	69.9664	65.8897	61.4863	51.3333	46.2335	45.7093	90.8698	82.1821	71.0032	71.753	61.8884	59.1954	54.5587	58.7004	91.3317	92.3756	83.0656	71.9836	63.1868	59.9135	60.2853	64.3579				3.2742	90.2035	0.907106	3	86.8645	2.97164	3	74.6784	4.20425	3	69.8755	1.99399	3	62.1872	0.513126	3	56.8141	2.7482	3	53.6925
138	3.34087		87.7013	85.6777	70.274	66.174	59.9322	50.6377	45.3233	44.8443	91.3634	80.8909	71.1974	70.9723	61.4059	59.842	54.3399	57.9061	89.5101	94.518	81.7269	72.529	62.8728	61.7159	59.009	63.7085				3.34087	89.5249	1.05717	3	87.0289	3.99138	3	74.3995	3.67341	3	69.8918	1.91244	3	61.4036	0.848896	3	57.3985	3.42343	3	52.8907
139	3.40753		88.0185	85.6777	70.0503	65.4633	59.9887	51.4203	44.5386	44.7751	90.8698	81.4719	71.4563	70.1916	61.0613	60.0575	53.3917	55.8845	90.892	94.4549	82.7979	71.1656	63.5793	60.4182	59.985	64.2136				3.40753	89.9268	0.954136	3	87.2015	3.82454	3	74.7682	4.03531	3	68.9402	1.76103	3	61.5431	1.06413	3	57.2986	2.94102	3	52.6384
140	3.4742		88.2382	84.9361	69.0436	64.7811	59.0562	50.2899	44.6642	44.9135	88.8957	80.6972	71.5858	70.6175	61.6127	59.4109	52.8082	56.3177	89.8869	93.8248	82.0616	73.9605	63.8148	59.6251	59.4595	62.0491				3.4742	89.0069	0.479196	3	86.486	3.86805	3	74.2303	3.9838	3	69.7863	2.68223	3	61.4946	1.37494	3	56.442	3.07667	3	52.3106
141	3.54087		87.8721	86.3171	70.33	64.4684	59.4801	50.5217	43.9736	44.4637	88.8341	82.8276	70.6796	70.2626	60.0965	59.2672	52.8082	54.4404	94.1583	94.581	83.4003	71.302	62.9513	60.274	59.1592	62.6984				3.54087	90.2882	1.95489	3	87.9086	3.48496	3	74.8033	4.29968	3	68.6777	2.12589	3	60.8426	1.06926	3	56.6876	3.09662	3	51.9803
142	3.60752		87.5305	85.6522	69.6868	64.5253	59.5366	49.4493	44.5072	43.9446	95.7434	80.3099	69.3204	71.1852	60.2343	57.9741	52.6623	54.0794	89.6357	92.0605	81.5261	73.2788	64.9137	59.1204	57.8078	63.6364				3.60752	90.9698	2.46291	3	86.0075	3.39676	3	73.5111	4.0089	3	69.6631	2.63904	3	61.5615	1.68813	3	55.5146	3.05066	3	51.6591
143	3.6742		87.9209	84.8338	70.5257	63.7578	59.4518	48.6667	44.4444	43.3218	90.9932	81.2782	69.5146	69.8368	60.4411	58.3333	52.8811	54.5848	89.6985	93.5728	82.7979	71.302	62.2449	59.9856	57.8829	63.8528				3.6742	89.5375	0.890531	3	86.5616	3.65276	3	74.2794	4.26923	3	68.2989	2.30958	3	60.7126	0.817642	3	55.6619	3.52997	3	51.7361
144	3.74087		87.4085	85.0128	69.9664	63.5873	58.4346	48.2319	44.162	43.5986	88.8957	81.6656	70.1618	68.3463	58.7181	59.842	52.5164	52.2744	91.8342	94.2029	83.0656	70.2795	62.0879	59.6972	58.3333	63.4921				3.74087	89.3795	1.30028	3	86.9604	3.74793	3	74.3979	4.33419	3	67.4044	1.98846	3	59.7469	1.17337	3	55.9237	3.84612	3	51.6706
145	3.80752		85.4075	84.8849	69.9664	63.701	57.6151	47.8551	43.2203	41.3841	91.3634	79.7289	70.6796	70.9013	60.5789	57.2557	52.8811	51.6968	91.206	94.959	84.2035	70.7566	60.0471	59.4809	57.5075	63.2756				3.80752	89.3256	1.95958	3	86.5243	4.47233	3	74.9498	4.6314	3	68.453	2.37638	3	59.4137	0.912295	3	54.8639	3.5628	3	51.203
146	3.87418		88.531	84.0921	68.9318	63.0472	58.5194	48	42.6554	41.9723	90.4997	79.5997	70.8738	69.5529	60.3032	57.6868	52.0788	51.6245	93.2161	93.6358	83.8019	71.4383	59.4976	59.8414	58.1832	62.3377				3.87418	90.7489	1.3582	3	85.7759	4.1384	3	74.5358	4.66682	3	68.0128	2.54176	3	59.4401	0.515766	3	55.1761	3.64154	3	50.9724
147	3.94085		87.8965	84.0665	68.9318	62.7061	57.6717	46.8116	43.1262	41.3495	89.451	79.9871	69.9676	69.0561	59.8897	56.9684	53.3917	49.9639	90.8291	92.5016	81.593	71.9836	60.2826	59.6251	58.2583	62.7706				3.94085	89.3922	0.847084	3	85.5184	3.68484	3	73.4975	4.05881	3	67.9153	2.73827	3	59.2813	0.81278	3	54.4684	3.90444	3	51.592
148	4.00752		87.3109	84.9872	68.4843	62.4503	57.4739	46.7246	41.9335	41.5917	90.0679	78.4377	71.0032	68.7722	60.7167	56.5374	53.6834	50.3249	91.6457	94.581	80.9906	72.12	60.3611	57.3901	57.0571	63.3478				4.00752	89.6748	1.2667	3	86.002	4.6877	3	73.4927	3.81881	3	67.7808	2.83507	3	59.5172	1.02683	3	53.5507	3.42189	3	50.8913
149	4.07418		86.7496	83.9642	67.4776	61.8533	56.7674	46.6087	42.1218	41.4879	94.1394	79.5997	69.8382	69.9077	61.5438	57.9023	53.2458	49.6751	93.1533	91.1783	80.2544	70.7566	60.832	58.0389	57.1321	62.987				4.07418	91.3474	2.31646	3	84.9141	3.37602	3	72.5234	3.92508	3	67.5059	2.83689	3	59.7144	1.48774	3	54.1833	3.78751	3	50.8332
150	5.47742		90.2635	56.0614	26.4821	19.1586	15.1455	10.3478	9.44758	10.6574	77.2363	52.6146	33.9806	44.1448	25.0861	21.5517	20.1313	18.9892	84.4221	91.1783	87.0147	49.6933	49.6075	21.7736	19.1441	37.2294				5.47742	83.974	3.76732	3	66.6181	12.3204	3	49.1591	19.0512	3	37.6655	9.39107	3	29.9464	10.2408	3	17.8911	3.77216	3	16.241
151	5.52102		91.2884	55.6777	26.1745	19.585	14.5239	10.1739	8.88261	10.173	77.9149	52.6791	34.4337	45.6352	25.4997	22.9885	19.7666	19.7834	82.7889	90.0441	88.6881	49.8296	50.157	21.1247	18.4685	37.4459				5.52102	83.9974	3.90761	3	66.1337	11.9865	3	49.7654	19.6068	3	38.3499	9.46027	3	30.0602	10.5361	3	18.0957	3.99728	3	15.7059
152	5.5645		90.8736	56.1637	26.9855	18.7038	14.5804	10.2319	8.56874	9.9654	78.5935	52.1627	34.3042	46.8417	26.2578	23.8506	20.423	24.7653	82.7261	89.8551	87.6171	50.1704	52.1193	22.8551	18.9189	37.2294				5.5645	84.0644	3.60757	3	66.0605	11.9532	3	49.6356	19.1079	3	38.572	9.98045	3	30.9858	11.0914	3	18.9792	4.38308	3	15.9702
153	5.608		89.7267	56.3939	26.6779	19.0733	14.2696	10.4058	8.38041	9.37716	79.2721	51.5817	35.534	46.3449	26.6023	22.8448	19.6937	23.3213	83.4799	90.1701	88.5542	51.1929	52.0408	21.4131	17.7177	36.7244				5.608	84.1595	3.03707	3	66.0486	12.1405	3	50.2553	19.3193	3	38.8704	9.99697	3	30.9709	11.1203	3	18.2213	3.92952	3	15.2639
154	5.65173		91.0688	55.5499	25.811	19.3007	14.2978	10.8406	8.38041	9.06574	77.6681	52.4209	36.246	47.4095	30.3239	23.1322	18.8184	20.7942	81.7839	89.288	87.2825	50.9202	53.2967	21.5573	17.5676	36.5801				5.65173	83.5069	3.96322	3	65.7529	11.8021	3	49.7798	18.9918	3	39.2102	10.0062	3	32.6395	11.3174	3	18.51	3.86158	3	14.9221
155	5.6955		90.3856	56.0614	26.4541	19.6134	14.3543	10.9565	8.25487	8.71972	77.298	53.7121	35.3398	47.0546	26.3956	22.7011	17.2137	20.6498	83.4171	91.0523	87.2155	53.2379	53.1397	21.7015	17.3423	37.1573				5.6955	83.7002	3.78071	3	66.9419	12.0743	3	49.6698	18.9473	3	39.9687	10.333	3	31.2965	11.4614	3	18.4531	3.75936	3	14.2703
156	5.73898		90.5808	55.8824	26.2864	19.1018	14.4956	10.3188	8.03515	8.75433	81.2461	54.164	35.8576	47.0546	26.4645	22.7011	17.9431	21.5162	81.3442	88.7839	87.0147	52.0791	55.259	21.7015	17.2673	36.5079				5.73898	84.3904	3.09533	3	66.2767	11.2645	3	49.7196	18.8512	3	39.4118	10.2581	3	32.0731	12.0969	3	18.2405	3.97133	3	14.4152
157	5.78273		89.1898	55.9079	26.538	19.3007	14.6652	10.3478	8.06654	8.23529	78.7785	53.0019	36.9579	47.7644	26.1199	22.773	17.1408	20.722	80.8417	88.9729	86.0107	54.1241	55.73	22.1341	16.5916	36.9408				5.78273	82.9367	3.1828	3	65.9609	11.5365	3	49.8356	18.336	3	40.3964	10.7064	3	32.1717	12.2345	3	18.4183	4.03945	3	13.933
158	5.82648		90.3612	55.0639	26.1186	18.647	14.4109	10.3768	7.94099	8.13149	80.5059	52.0981	34.9515	48.1192	26.6023	22.7011	16.7761	21.7329	81.9724	89.603	86.2115	54.6012	55.4945	22.062	16.6667	36.0029				5.82648	84.2798	3.07001	3	65.5884	12.0378	3	49.0938	18.7332	3	40.4558	11.0638	3	32.1692	12.1821	3	18.38	4.00584	3	13.7946
159	5.86997		90.2147	56.3427	24.7763	18.5048	14.976	10.2609	8.19209	8.06228	82.5416	54.4222	35.1456	47.4805	26.4645	22.4138	16.7031	23.3935	81.7211	88.2168	86.4123	54.4649	55.4945	21.4852	17.042	36.6522				5.86997	84.8258	2.70485	3	66.3272	10.9588	3	48.7781	19.0537	3	40.1501	11.0088	3	32.3117	12.0565	3	18.0533	3.90542	3	13.9791
160	5.91372		89.7023	56.1125	25.1957	18.4764	14.2131	10.087	7.47018	7.78547	83.5904	52.6791	34.9515	47.0546	27.2915	22.9167	16.7031	25.1264	82.4749	90.7372	86.0776	55.0102	56.6719	21.8457	16.3664	36.7244				5.91372	85.2558	2.24642	3	66.5096	12.1543	3	48.7416	18.8792	3	40.1804	11.0924	3	32.7255	12.5543	3	18.2831	4.10972	3	13.5132
		Vi	5.57806	12.6572	17.3391	20.8251	22.0741	26.2712	33.6856	36.1273	7.4034	9.92421	13.7967	15.5745	24.6942	25.4946	27.0105	34.2883	4.52296	13.5036	11.1693	16.6728	23.0114	21.7959	27.3294	22.8836
		Vi normalized	0	7.0791	11.7611	15.247	16.496	20.6931	28.1076	30.5493	0	2.52081	6.3933	8.17114	17.2908	18.0912	19.6071	26.8849	0	8.98064	6.64638	12.1498	18.4884	17.2729	22.8065	18.3607
			Mn concentration (uM)								Mn concentration (uM)								Mn concentration (uM)
	RAW DATA		0	1	5	10	25	50	200	400	0	1	5	10	25	50	200	400	0	1	5	10	25	50	200	400
			4111	4000	3967	3940	3466	3950	3856	3977	2325	2283	2254	2299	2287	2261	2375	2403	1967	1670	2074	2006	2067	2124	2065	2021
			4103	3919	3880	3922	3475	3835	3847	3874	2274	2236	2225	2257	2313	2268	2314	2404	1936	1647	2009	1982	2062	2108	2094	1951
			3897	3795	3810	3902	3443	3874	3826	3825	2303	2271	2237	2231	2333	2226	2363	2419	1881	1694	1976	2034	2053	2082	2044	2034
			3928	3718	3729	3776	3451	3865	3774	3783	2219	2177	2229	2245	2252	2236	2262	2341	1867	1677	1993	1968	2056	2131	2053	2005
			3868	3731	3724	3769	3385	3773	3682	3741	2245	2187	2161	2198	2257	2229	2264	2306	1857	1745	1919	1942	2006	2012	2074	2021
			3845	3675	3709	3736	3409	3725	3651	3695	2248	2170	2129	2211	2224	2166	2240	2237	1778	1676	1970	1931	1957	1950	2049	1944
			3856	3646	3715	3717	3397	3532	3707	3646	2164	2177	2128	2147	2186	2123	2173	2367	1855	1708	1943	1931	1942	1998	2038	1930
			3767	3615	3669	3662	3365	3575	3683	3653	2136	2092	2124	2129	2128	2144	2186	2505	1897	1716	1858	1898	1939	1926	1983	1959
			3773	3619	3611	3652	3351	3500	3647	3590	2156	2115	2079	2079	2153	2053	2166	2377	1796	1717	1890	1812	1878	1879	1950	1897
			3734	3597	3618	3599	3315	3507	3656	3619	2244	2057	2067	2068	2096	2015	2140	2493	1843	1681	1860	1830	1901	1902	1967	1874
			3714	3540	3648	3544	3356	3492	3539	3538	2150	2026	2050	2084	2071	2062	2129	2646	1822	1724	1854	1861	1858	1882	1954	1855
			3694	3544	3570	3555	3320	3510	3516	3526	2148	2004	2005	2034	2050	2024	2106	2565	1826	1695	1844	1804	1845	1870	1899	1867
			3640	3524	3511	3515	3358	3414	3509	3483	2093	2003	1987	1989	2024	2010	2080	2613	1803	1663	1777	1807	1875	1828	1887	1829
			3642	3535	3552	3548	3339	3486	3487	3480	2079	1980	1951	2009	2025	1971	2055	2414	1768	1662	1803	1769	1814	1851	1890	1822
			3604	3544	3519	3424	3356	3480	3498	3465	2034	1999	1896	2003	2018	1966	2048	2303	1743	1662	1782	1775	1817	1797	1864	1821
			3562	3466	3446	3474	3359	3413	3439	3468	2061	1994	1934	1975	2004	1958	2025	2426	1717	1675	1756	1769	1826	1817	1852	1806
			3596	3466	3492	3422	3302	3430	3500	3490	2012	1947	1891	1959	2021	1994	2003	2503	1770	1642	1770	1759	1813	1763	1882	1773
			3532	3461	3418	3453	3327	3363	3387	3421	2008	1930	1908	1961	2005	1957	1946	2605	1735	1652	1715	1766	1789	1813	1845	1786
			3546	3392	3457	3353	3313	3386	3389	3407	2031	1938	1907	1955	1958	1950	1968	2443	1734	1619	1725	1729	1787	1780	1862	1777
			3511	3408	3426	3333	3257	3344	3359	3441	1987	1940	1898	1916	1929	1936	1966	1971	1735	1639	1723	1704	1733	1755	1858	1766
			3496	3384	3410	3369	3274	3344	3414	3395	1996	1884	1855	1921	1934	1923	1951	1961	1683	1635	1713	1686	1762	1763	1825	1772
			3531	3379	3446	3366	3280	3358	3379	3373	1933	1903	1870	1911	1953	1896	1928	1943	1682	1627	1722	1691	1725	1730	1854	1708
			3446	3403	3387	3306	3233	3321	3369	3364	2004	1924	1871	1910	1899	1938	1909	1937	1693	1643	1706	1684	1712	1733	1815	1751
			3509	3407	3415	3348	3275	3299	3362	3345	2020	1902	1869	1881	1927	1930	1921	1928	1705	1643	1707	1698	1742	1741	1849	1715
			3439	3402	3363	3344	3258	3362	3356	3352	2043	1902	1873	1881	1888	1963	1929	1919	1719	1624	1672	1666	1705	1713	1814	1720
			3486	3387	3384	3332	3218	3331	3347	3336	2004	1884	1847	1888	1863	1864	1893	1885	1678	1670	1689	1704	1719	1696	1804	1715
			3391	3342	3394	3323	3223	3320	3327	3298	1974	1914	1822	1886	1902	1876	1888	1893	1697	1659	1665	1644	1711	1666	1818	1702
			3452	3350	3330	3282	3211	3327	3358	3365	2007	1878	1811	1905	1948	1877	1902	1892	1678	1643	1701	1650	1692	1699	1794	1717
			3426	3322	3334	3254	3201	3264	3295	3339	1997	1857	1788	1887	1874	1857	1917	1879	1690	1603	1661	1645	1663	1680	1815	1701
			3412	3363	3385	3275	3183	3334	3337	3296	2039	1849	1798	1846	1851	1880	1906	1874	1690	1609	1668	1660	1659	1679	1774	1680
			3417	3357	3323	3269	3220	3231	3361	3307	2049	1828	1796	1882	1877	1844	1895	1820	1704	1643	1664	1642	1670	1669	1770	1685
			3379	3314	3325	3321	3172	3228	3342	3289	2047	1829	1779	1852	1846	1913	1849	1850	1694	1639	1675	1635	1666	1640	1795	1696
			3413	3332	3309	3248	3172	3233	3289	3274	2036	1837	1787	1841	1849	1861	1869	2105	1692	1633	1643	1643	1673	1628	1786	1661
			3382	3361	3302	3278	3173	3271	3289	3250	2053	1810	1777	1805	1873	1839	1833	1965	1699	1632	1640	1617	1650	1630	1764	1686
			3410	3302	3294	3244	3185	3233	3254	3247	2039	1818	1807	1793	1853	1822	1815	1819	1618	1631	1645	1646	1625	1657	1765	1660
			3381	3321	3297	3201	3189	3258	3288	3262	2109	1803	1777	1782	1810	1835	1816	1798	1639	1626	1646	1638	1634	1648	1766	1692
			3378	3243	3292	3200	3201	3198	3243	3288	2058	1818	1779	1793	1793	1855	1810	1798	1640	1640	1633	1636	1648	1647	1744	1645
			3351	3319	3287	3260	3198	3220	3217	3291	2052	1807	1757	1797	1803	1793	1787	1820	1686	1606	1657	1618	1642	1629	1745	1637
			3330	3317	3243	3213	3191	3263	3237	3240	1937	1783	1739	1764	1843	1824	1788	1792	1686	1642	1627	1604	1657	1613	1729	1656
			3335	3298	3260	3178	3191	3251	3231	3285	1878	1754	1757	1752	1787	1812	1827	1822	1707	1580	1643	1630	1647	1614	1704	1621
			3343	3264	3235	3213	3167	3208	3209	3214	1866	1775	1739	1771	1792	1807	1797	1851	1689	1616	1629	1639	1647	1637	1711	1639
			3325	3248	3306	3165	3230	3164	3230	3245	1890	1750	1742	1797	1806	1753	1798	1802	1658	1601	1650	1634	1617	1646	1701	1662
			3365	3286	3248	3207	3189	3199	3178	3233	1917	1770	1711	1733	1877	1758	1797	1780	1665	1622	1631	1575	1599	1627	1698	1641
			3301	3271	3237	3141	3213	3210	3229	3260	1872	1752	1692	1735	1828	1773	1805	1795	1656	1626	1612	1618	1637	1648	1687	1647
			3307	3249	3238	3193	3192	3206	3209	3237	1859	1734	1720	1741	1788	1765	1777	1782	1660	1608	1605	1591	1599	1610	1692	1633
			3306	3255	3230	3172	3175	3198	3205	3291	1869	1738	1703	1734	1727	1726	1810	1759	1651	1617	1628	1616	1630	1616	1663	1644
			3302	3328	3207	3167	3199	3153	3192	3176	1871	1721	1718	1704	1709	1752	1766	1839	1700	1656	1590	1623	1632	1610	1671	1622
			3288	3281	3188	3158	3168	3198	3203	3143	1817	1748	1707	1730	1736	1738	1793	1812	1644	1650	1598	1634	1617	1600	1665	1637
			3311	3315	3182	3177	3174	3158	3194	3177	1825	1724	1713	1722	1738	1732	1777	1796	1665	1662	1579	1605	1573	1613	1674	1614
			4857	4829	4487	4688	4672	4673	4575	4066	1792	1780	1785	1716	1763	1766	1764	1949	1722	1729	1683	1737	1670	1743	1768	1763
			4692	4775	4430	4678	4498	4510	4478	4157	1767	1752	1788	1727	1786	1782	1770	2001	1712	1753	1726	1729	1673	1723	1812	1703
			4707	4642	4299	4596	4591	4495	4428	4112	1990	1763	1770	1705	1743	1756	1774	1995	1697	1720	1713	1718	1625	1728	1754	1722
			4632	4558	4269	4603	4519	4428	4486	4101	1966	1729	1748	1730	1735	1752	1784	1992	1721	1799	1673	1715	1574	1723	1736	1729
			4577	4520	4231	4414	4489	4509	4241	4053	1921	1699	1751	1693	1739	1747	1755	1909	1707	1763	1663	1673	1587	1722	1745	1689
			4509	4545	4215	4524	4453	4358	4281	4104	1932	1723	1737	1652	1762	1745	1702	1829	1709	1768	1667	1693	1590	1732	1732	1701
			4552	4496	4138	4477	4433	4361	4160	3992	1852	1730	1750	1655	1756	1721	1718	1775	1713	1772	1659	1723	1594	1695	1729	1703
			4475	4501	4144	4466	4481	4271	4353	4039	1813	1695	1755	1675	1792	1744	1765	1765	1707	1763	1665	1688	1624	1715	1708	1679
			4429	4494	4141	4419	4405	4352	4190	4032	1740	1713	1743	1661	1707	1716	1713	1722	1663	1777	1666	1692	1602	1710	1726	1673
			4488	4629	4142	4354	4416	4307	4154	4034	1756	1693	1723	1668	1720	1706	1718	1726	1680	1790	1698	1703	1595	1672	1706	1669
			4321	4389	4044	4308	4371	4273	4212	3968	1727	1708	1727	1633	1697	1721	1721	1763	1718	1832	1664	1705	1576	1703	1705	1676
			4279	4492	4025	4340	4318	4312	4187	4032	1720	1731	1725	1654	1700	1698	1764	1803	1697	1847	1660	1695	1556	1772	1705	1700
			4250	4419	4011	4273	4400	4250	4107	4046	1758	1737	1716	1608	1713	1710	1716	1824	1669	1825	1674	1682	1577	1681	1679	1643
			4407	4401	4229	4324	4322	4171	4103	4021	1743	1725	1739	1620	1777	1677	1688	1835	1675	1836	1675	1698	1540	1680	1696	1684
			4235	4510	4185	4233	4326	4148	4156	3956	1723	1669	1695	1589	1779	1729	1681	1868	1651	1862	1657	1694	1554	1651	1690	1671
			4340	4456	4086	4255	4343	4180	4161	3957	1707	1640	1686	1611	1770	1650	1648	1878	1697	1825	1678	1686	1552	1688	1679	1675
			4379	4416	4073	4259	4320	4119	4077	3973	1713	1669	1697	1589	1691	1671	1658	1965	1744	1823	1636	1706	1514	1714	1652	1719
			4310	4381	4085	4168	4331	4160	4066	3997	1682	1670	1702	1583	1655	1659	1673	1937	1682	1870	1658	1694	1536	1676	1704	1680
			4283	4379	4041	4187	4300	4136	4075	3986	1969	1639	1643	1578	1686	1661	1664	1906	1708	1844	1663	1706	1526	1673	1638	1668
			4359	4388	4153	4150	4377	4134	4086	3942	1689	1644	1686	1580	1701	1647	1698	1842	1664	1855	1654	1683	1506	1694	1676	1693
			4098	3910	3576	3518	3539	3450	3186	2890	1621	1549	1545	1409	1451	1392	1371	1385	1592	1587	1494	1467	1274	1387	1332	1386
			4046	3863	3421	3462	3503	3330	3048	2807	1565	1562	1524	1397	1436	1394	1323	1318	1537	1562	1469	1454	1275	1325	1297	1363
			4069	3849	3463	3444	3497	3260	2984	2721	1582	1495	1493	1367	1391	1358	1305	1296	1601	1563	1448	1436	1228	1327	1271	1304
			3994	3792	3384	3374	3386	3178	2900	2696	1610	1501	1487	1365	1376	1365	1251	1254	1556	1612	1451	1401	1243	1327	1280	1306
			4009	3818	3335	3307	3367	3030	2841	2650	1696	1494	1482	1346	1358	1311	1219	1225	1547	1549	1436	1400	1205	1306	1233	1281
			3905	3813	3323	3276	3337	3014	2752	2624	1741	1495	1458	1350	1339	1302	1219	1224	1546	1587	1447	1382	1179	1323	1244	1275
			3967	3760	3303	3247	3245	2958	2788	2622	1533	1492	1468	1352	1337	1305	1203	1216	1549	1526	1417	1390	1171	1240	1206	1261
			3984	3750	3303	3230	3253	2945	2735	2576	1556	1487	1430	1308	1307	1274	1186	1140	1521	1563	1433	1395	1143	1266	1174	1227
			3862	3709	3248	3188	3230	2826	2712	2532	1731	1462	1409	1302	1288	1275	1180	1166	1523	1560	1405	1382	1141	1276	1159	1217
			3878	3741	3226	3208	3197	2867	2558	2527	1563	1448	1400	1299	1272	1228	1144	1139	1562	1547	1429	1339	1162	1228	1166	1209
			3892	3729	3182	3147	3255	2854	2650	2455	1557	1442	1396	1288	1253	1227	1159	1134	1549	1533	1407	1343	1115	1226	1173	1208
			3838	3736	3192	3147	3156	2715	2563	2393	1771	1440	1398	1300	1254	1211	1117	1090	1549	1579	1447	1348	1154	1226	1126	1171
			3848	3744	3232	3180	3108	2747	2496	2367	1535	1442	1413	1270	1224	1206	1122	1095	1566	1539	1403	1357	1103	1190	1128	1176
			3837	3706	3202	3080	3073	2707	2527	2334	1539	1433	1374	1254	1227	1202	1089	1134	1534	1530	1414	1351	1099	1185	1126	1189
			3884	3721	3247	3160	3050	2728	2421	2292	1520	1417	1362	1231	1231	1171	1070	1107	1568	1543	1408	1324	1098	1165	1098	1170
			3874	3670	3205	3116	2983	2674	2432	2283	1560	1450	1324	1257	1194	1127	1065	1101	1554	1499	1416	1301	1091	1163	1106	1136
			3808	3637	3118	3023	2970	2561	2379	2215	1558	1438	1319	1226	1167	1132	1066	1139	1513	1515	1420	1305	1071	1146	1081	1157
			3865	3635	3127	3056	3000	2587	2327	2179	1508	1428	1317	1231	1183	1151	1060	1079	1522	1500	1393	1302	1072	1180	1069	1136
			3820	3664	3142	2973	2934	2611	2337	2184	1497	1408	1319	1213	1173	1098	1043	1069	1519	1513	1376	1301	1094	1168	1066	1114
			3835	3644	3100	2951	2959	2562	2278	2129	1513	1400	1322	1205	1152	1108	1033	1037	1525	1487	1365	1266	1041	1122	1053	1116
			3790	3680	3073	2985	2898	2572	2291	2112	1503	1415	1308	1199	1139	1093	1014	1037	1542	1532	1388	1302	1038	1098	1057	1101
			3816	3612	3065	2961	2852	2566	2275	2089	1496	1397	1302	1182	1140	1090	1014	1033	1521	1488	1369	1256	1044	1107	1058	1101
			3776	3628	3091	2925	2870	2517	2259	2095	1563	1363	1288	1182	1112	1065	1002	1016	1490	1485	1367	1269	1024	1087	1028	1080
			3734	3641	3039	2916	2842	2465	2204	2016	1480	1379	1275	1174	1143	1046	985	986	1528	1483	1402	1249	1036	1093	1036	1078
			3804	3591	3017	2936	2848	2463	2208	2010	1498	1399	1272	1189	1111	1022	966	1057	1546	1478	1345	1267	1020	1089	1008	1062
			3795	3626	2963	2867	2799	2476	2194	2002	1463	1351	1260	1175	1103	1051	969	1017	1499	1473	1361	1254	1015	1057	996	1063
			3731	3540	3020	2813	2778	2476	2176	1983	1472	1375	1256	1161	1096	1055	967	1052	1496	1475	1337	1248	988	1097	998	1064
			3799	3571	2945	2849	2749	2420	2098	1948	1493	1364	1249	1160	1098	1028	963	1046	1520	1495	1350	1233	993	1084	999	1063
			3771	3524	2991	2812	2696	2379	2085	1891	1469	1352	1274	1163	1093	1025	944	999	1518	1500	1346	1235	991	1039	981	1059
			3723	3511	2981	2833	2761	2341	2064	1925	1478	1339	1264	1157	1083	1008	926	998	1505	1494	1348	1221	996	1037	973	1038
			3667	3552	2914	2750	2711	2368	2071	1899	1474	1365	1250	1129	1079	995	930	981	1496	1487	1317	1229	1036	1028	962	1038
			3717	3503	2902	2773	2701	2337	2044	1889	1439	1341	1265	1120	1071	1013	926	976	1503	1540	1347	1213	955	1037	975	993
			3710	3519	2903	2774	2689	2332	2021	1897	1464	1337	1235	1135	1053	991	912	941	1499	1526	1321	1209	963	1035	954	1019
			3719	3502	2853	2787	2682	2286	2000	1833	1487	1331	1226	1124	1043	977	914	926	1498	1525	1341	1238	962	1007	929	1024
			3687	3508	2915	2731	2667	2305	2015	1800	1488	1349	1231	1134	1059	988	896	934	1491	1520	1335	1227	960	1002	934	1011
			3682	3484	2871	2810	2645	2266	1969	1813	1490	1342	1204	1111	1054	967	911	960	1503	1510	1338	1196	944	997	931	1019
			3731	3439	2883	2714	2589	2276	1954	1795	1467	1349	1195	1122	1050	994	900	981	1490	1503	1317	1196	947	999	943	1018
			3709	3455	2843	2749	2594	2251	1940	1765	1441	1340	1229	1127	1044	980	873	962	1482	1558	1330	1205	928	994	906	994
			3714	3506	2820	2732	2624	2301	1902	1734	1476	1338	1238	1101	1060	937	873	979	1507	1576	1319	1181	924	988	904	984
			3706	3460	2786	2676	2585	2252	1926	1748	1457	1314	1225	1113	1072	953	872	948	1476	1571	1309	1193	920	981	920	964
			3649	3474	2816	2626	2574	2171	1920	1725	1473	1316	1195	1086	1004	938	864	964	1497	1550	1292	1169	930	982	929	971
			3616	3515	2782	2675	2531	2202	1880	1704	1470	1310	1177	1088	992	934	863	948	1496	1544	1285	1166	921	978	909	986
			3656	3464	2823	2683	2528	2157	1835	1662	1478	1307	1199	1079	981	941	847	934	1439	1514	1300	1162	898	986	887	966
			3653	3477	2824	2686	2527	2203	1831	1661	1447	1290	1172	1101	1012	928	844	934	1493	1547	1323	1170	925	944	878	987
			3706	3449	2788	2670	2496	2174	1857	1658	1444	1305	1168	1063	980	918	858	913	1464	1567	1308	1134	893	954	882	948
			3664	3439	2748	2624	2508	2135	1797	1649	1473	1301	1207	1061	978	915	820	892	1470	1528	1300	1149	896	944	876	970
			3628	3455	2803	2573	2445	2065	1794	1620	1448	1296	1173	1056	972	932	827	935	1487	1512	1284	1139	893	939	863	945
			3641	3469	2751	2619	2438	2111	1800	1625	1455	1300	1175	1050	975	893	818	900	1475	1541	1258	1134	894	927	883	965
			3639	3434	2731	2556	2440	2081	1768	1608	1453	1264	1168	1060	983	893	830	912	1479	1520	1269	1127	925	923	853	956
			3619	3384	2726	2551	2425	2054	1737	1583	1472	1286	1198	1077	947	914	807	898	1450	1514	1282	1129	888	921	866	939
			3656	3420	2723	2567	2426	2033	1734	1573	1458	1274	1149	1063	936	898	807	866	1469	1492	1293	1123	857	920	847	944
			3617	3422	2680	2581	2420	2033	1693	1597	1694	1285	1180	1056	933	896	816	873	1463	1516	1288	1117	867	914	846	943
			3697	3443	2707	2524	2359	1989	1677	1549	1491	1287	1147	1057	925	891	795	885	1472	1511	1262	1121	866	931	850	937
			3677	3379	2692	2498	2351	2009	1705	1550	1488	1294	1145	1040	944	872	805	875	1454	1512	1279	1135	887	897	836	931
			3645	3370	2692	2476	2360	1988	1688	1496	1481	1278	1146	1055	931	875	798	884	1470	1505	1262	1110	855	919	854	932
			3655	3359	2667	2452	2401	1948	1667	1481	1489	1259	1130	1036	955	871	792	904	1454	1473	1273	1086	849	890	860	922
			3680	3395	2650	2489	2322	1957	1640	1460	1463	1270	1139	1044	935	858	782	886	1474	1482	1270	1105	843	896	830	931
			3588	3378	2600	2412	2305	1917	1620	1482	1447	1301	1142	1033	928	869	791	892	1460	1516	1253	1111	841	881	834	917
			3656	3397	2620	2418	2254	1891	1596	1450	1451	1286	1143	1057	932	855	771	881	1448	1514	1262	1095	832	877	820	905
			3645	3419	2640	2436	2265	1902	1575	1436	1491	1265	1138	1034	913	829	771	884	1449	1480	1253	1083	831	879	816	931
			3647	3364	2641	2353	2228	1839	1569	1421	1470	1316	1140	1031	909	852	773	861	1476	1486	1252	1090	847	878	803	920
			3637	3400	2610	2397	2215	1861	1548	1369	1451	1280	1133	1037	917	861	761	835	1472	1492	1258	1086	849	869	803	922
			3643	3402	2571	2337	2213	1860	1549	1383	1457	1220	1128	1024	909	843	763	833	1467	1518	1226	1099	825	861	809	926
			3625	3345	2602	2354	2188	1811	1522	1378	1437	1270	1120	1006	894	855	767	831	1470	1484	1250	1083	819	852	816	899
			3619	3365	2588	2371	2203	1818	1502	1367	1458	1282	1111	1018	896	832	752	838	1431	1474	1248	1092	856	864	823	916
			3626	3372	2521	2338	2181	1771	1482	1340	1454	1243	1126	1042	909	840	749	795	1470	1449	1239	1078	836	858	802	879
			3557	3364	2580	2278	2187	1773	1476	1308	1452	1247	1119	1023	902	833	746	800	1451	1484	1233	1071	813	863	797	900
			3623	3364	2502	2318	2176	1771	1473	1321	1473	1273	1097	1011	898	824	748	813	1454	1466	1241	1056	805	831	803	892
			3594	3350	2513	2328	2121	1747	1444	1296	1481	1253	1100	1000	891	833	745	802	1425	1500	1221	1064	801	856	786	883
			3607	3350	2505	2303	2123	1774	1419	1294	1473	1262	1104	989	886	836	732	774	1447	1499	1237	1044	810	838	799	890
			3616	3321	2469	2279	2090	1735	1423	1298	1441	1250	1106	995	894	827	724	780	1431	1489	1226	1085	813	827	792	860
			3601	3375	2515	2268	2105	1743	1401	1285	1440	1283	1092	990	872	825	724	754	1499	1501	1246	1046	802	836	788	869
			3587	3349	2492	2270	2107	1706	1418	1270	1552	1244	1071	1003	874	807	722	749	1427	1461	1218	1075	827	820	770	882
			3603	3317	2522	2243	2104	1679	1416	1252	1475	1259	1074	984	877	812	725	756	1428	1485	1237	1046	793	832	771	885
			3582	3324	2502	2237	2068	1664	1407	1260	1441	1265	1084	963	852	833	720	724	1462	1495	1241	1031	791	828	777	880
			3500	3319	2502	2241	2039	1651	1377	1196	1481	1235	1092	999	879	797	725	716	1452	1507	1258	1038	765	825	766	877
			3628	3288	2465	2218	2071	1656	1359	1213	1467	1233	1095	980	875	803	714	715	1484	1486	1252	1048	758	830	775	864
			3602	3287	2465	2206	2041	1615	1374	1195	1450	1239	1081	973	869	793	732	692	1446	1468	1219	1056	768	827	776	870
			3578	3323	2449	2197	2034	1612	1336	1202	1460	1215	1097	969	881	787	736	697	1459	1501	1210	1058	769	796	760	878
			3555	3283	2413	2176	2009	1608	1342	1199	1526	1233	1079	985	893	806	730	688	1483	1447	1199	1038	775	805	761	873
			3699	2192	947	674	536	357	301	308	1252	815	525	622	364	300	276	263	1344	1447	1300	729	632	302	255	516
			3741	2177	936	689	514	351	283	294	1263	816	532	643	370	320	271	274	1318	1429	1325	731	639	293	246	519
			3724	2196	965	658	516	353	273	288	1274	808	530	660	381	332	280	343	1317	1426	1309	736	664	317	252	516
			3677	2205	954	671	505	359	267	271	1285	799	549	653	386	318	270	323	1329	1431	1323	751	663	297	236	509
			3732	2172	923	679	506	374	267	262	1259	812	560	668	440	322	258	288	1302	1417	1304	747	679	299	234	507
			3704	2192	946	690	508	378	263	252	1253	832	546	663	383	316	236	286	1328	1445	1303	781	677	301	231	515
			3712	2185	940	672	513	356	256	253	1317	839	554	663	384	316	246	298	1295	1409	1300	764	704	301	230	506
			3655	2186	949	679	519	357	257	238	1277	821	571	673	379	317	235	287	1287	1412	1285	794	710	307	221	512
			3703	2153	934	656	510	358	253	235	1305	807	540	678	386	316	230	301	1305	1422	1288	801	707	306	222	499
			3697	2203	886	651	530	354	261	233	1338	843	543	669	384	312	229	324	1301	1400	1291	799	707	298	227	508
			3676	2194	901	650	503	348	238	225	1355	816	540	663	396	319	229	348	1313	1440	1286	807	722	303	218	509
[truncated: 5 more columns]

## Sheet: Figure5H
SiNRAT1-S68A
LPR50
Mn
K=10 uM
Vmax= 25 dF/min
			Mn2+ (μM)	Vi (ΔF.min-1)
			0	0	0	0
			1	7.0791	2.52081	8.98064
			5	11.7611	6.3933	6.64638
			10	15.247	8.17114	12.1499
			25	16.496	17.2908	18.4884
			50	20.6931	18.0911	17.2729
			200	28.1076	19.6071	22.8065
			400	30.5493	26.8849	18.3607

## Sheet: Figure5I
SiNRAT1-S68A
LPR50
																		Condition
		NORM.	Mn (uM) /Ca (mM)				Mn (uM) /Ca (mM)				Mn (uM) /Ca (mM)							Mean	SEM	N
Cycle Nr.	Time (min)		0/0	50/0	50/0.5	50/2	0/0	50/0	50/0.5	50/2	0/0	50/0	50/0.5	50/2			Time (min)	0 μM Mn2+ / 0 mM Ca2+			50 μM Mn2+ / 0 mM Ca2+			50 μM Mn2+ / 0.5 mM Ca2+			50 μM Mn2+ / 2 mM Ca2+
1	-5.79337		88.145	93.501	86.4651	85.5314	145.86	163.747	153.39	161.014	138.452	153.781	127.362	127.448			-5.79337	124.152	18.1302	3	137.01	21.9437	3	122.406	19.4779	3	124.665	21.8345	3
2	-5.72617		87.109	92.5577	85.3981	83.7665	142.357	157.73	149.322	158.743	135.232	149.753	126.592	125.733			-5.72617	121.566	17.3508	3	133.347	20.5242	3	120.437	18.708	3	122.748	21.6954	3
3	-5.6595		88.165	93.1447	85.3389	83.6501	141.083	161.843	148.465	159.046	136.78	149.187	125.612	126.805			-5.6595	122.009	16.9677	3	134.725	21.1087	3	119.806	18.4529	3	123.167	21.8408	3
4	-5.59283		86.7304	91.5094	85.7143	83.1265	138.344	155.903	145.111	154.504	135.356	151.731	122.463	120.944			-5.59283	120.143	16.7288	3	133.048	20.804	3	117.763	17.3066	3	119.525	20.6172	3
5	-5.52617		87.0293	92.6415	83.8767	82.758	137.516	153.846	142.969	154.05	135.851	147.138	122.043	119.157			-5.52617	120.132	16.5584	3	131.209	19.3805	3	116.296	17.2989	3	118.655	20.5818	3
6	-5.4595		87.4676	91.4885	85.1808	82.8549	132.166	152.171	142.256	153.066	130.774	142.968	121.763	118.299			-5.4595	116.802	14.6729	3	128.876	18.8815	3	116.4	16.6929	3	118.073	20.2685	3
7	-5.39283		85.8139	91.4885	84.2324	83.5919	132.293	147.753	140.186	151.855	129.412	143.534	117.915	117.941			-5.39283	115.84	15.0359	3	127.592	18.0927	3	114.111	16.2639	3	117.796	19.7059	3
8	-5.32617		87.6071	92.327	85.5957	82.8549	130.955	147.677	139.329	147.767	128.545	142.686	118.265	116.44			-5.32617	115.702	14.0649	3	127.563	17.6769	3	114.396	15.6316	3	115.687	18.7422	3
9	-5.25952		85.794	91.3627	83.4025	82.3894	130.127	147.22	136.974	144.36	126.563	139.788	118.544	115.797			-5.25952	114.162	14.2211	3	126.124	17.5124	3	112.973	15.7135	3	114.182	17.9077	3
10	-5.19283		86.571	90.1468	83.6396	82.758	128.344	144.631	134.975	143.906	125.697	141.272	117.355	116.869			-5.19283	113.537	13.5047	3	125.35	17.6282	3	111.99	15.0601	3	114.511	17.6913	3
11	-5.12617		86.1725	89.8952	84.1336	81.5555	125.987	142.955	137.259	141.332	122.786	138.799	117.915	115.797			-5.12617	111.649	12.7716	3	123.883	17.0362	3	113.102	15.5236	3	112.895	17.317	3
12	-5.0595		85.5549	89.6436	82.8295	80.8379	125.987	142.803	132.263	140.802	121.858	139.152	118.824	113.581			-5.0595	111.133	12.8446	3	123.866	17.1437	3	111.306	14.757	3	111.74	17.3347	3
13	-4.9928		85.5947	89.2662	84.0743	81.5361	124.904	139.909	134.19	142.316	122.477	138.728	114.206	115.726			-4.9928	110.992	12.718	3	122.634	16.6875	3	110.823	14.5656	3	113.193	17.5914	3
14	-4.92612		86.4515	90.1677	85.1808	81.3033	125.924	142.955	131.834	138.759	118.019	138.021	113.366	116.583			-4.92612	110.131	12.0578	3	123.715	16.8338	3	110.127	13.5648	3	112.215	16.7291	3
15	-4.85947		85.5947	89.1195	83.2642	81.7494	122.803	138.233	132.12	137.926	117.895	135.406	114.416	114.796			-4.85947	108.764	11.6709	3	120.92	15.921	3	109.933	14.2804	3	111.491	16.3007	3
16	-4.7928		85.1763	88.9727	82.9085	82.0016	123.631	136.177	130.121	139.818	118.762	138.445	115.115	113.224			-4.7928	109.19	12.0886	3	121.198	16.126	3	109.382	13.9274	3	111.681	16.7081	3
17	-4.72613		85.515	89.8323	83.2839	82.5446	122.803	138.385	131.977	137.926	116.285	134.134	115.815	116.297			-4.72613	108.201	11.4979	3	120.784	15.5244	3	110.359	14.3188	3	112.256	16.1144	3
18	-4.65947		86.3718	88.5954	83.5013	80.2172	123.121	135.263	129.408	135.201	115.356	132.155	113.576	115.011			-4.65947	108.283	11.1825	3	118.671	15.0646	3	108.828	13.4629	3	110.143	16.0579	3
19	-4.5928		84.3794	90.4612	83.6594	80.1009	119.554	134.349	128.123	134.974	113.994	130.459	113.646	114.296			-4.5928	105.976	10.9168	3	118.423	14.026	3	108.476	13.0932	3	109.79	15.9998	3
20	-4.52613		83.7816	89.0776	84.4497	81.187	119.554	132.216	128.051	131.34	113.498	127.42	112.526	114.653			-4.52613	105.611	11.054	3	116.238	13.6507	3	108.342	12.7594	3	109.06	14.7455	3
21	-4.45947		85.3756	90.608	83.5013	80.9348	117.898	130.312	125.268	131.34	113.375	129.046	112.176	112.009			-4.45947	105.549	10.1711	3	116.655	13.0288	3	106.982	12.3335	3	108.094	14.6817	3
22	-4.39305		84.22	90.1887	83.9953	80.9542	119.682	129.931	124.268	133.687	112.136	125.442	112.316	114.51			-4.39305	105.346	10.7852	3	115.187	12.5663	3	106.86	11.9417	3	109.717	15.41	3
23	-4.32635		84.2997	88.0084	84.4102	81.0318	117.643	131.379	124.768	129.599	111.331	127.986	113.996	114.224			-4.32635	104.425	10.2262	3	115.791	13.9258	3	107.725	12.0649	3	108.285	14.3311	3
24	-4.25942		85.0369	89.0566	85.0425	80.9348	119.363	129.322	123.555	128.312	109.474	125.3	110.217	113.796			-4.25942	104.625	10.2014	3	114.56	12.8043	3	106.271	11.2912	3	107.681	14.0142	3
25	-4.19275		84.6384	89.1405	84.2324	80.8573	115.796	130.084	125.196	130.053	111.517	123.534	109.937	112.366			-4.19275	103.984	9.7513	3	114.253	12.6977	3	106.455	11.9527	3	107.759	14.3872	3
26	-4.12608		84.0805	88.6583	84.0348	80.7021	115.287	127.266	122.698	127.933	111.022	123.816	110.707	110.793			-4.12608	103.463	9.76911	3	113.247	12.3345	3	105.813	11.4262	3	106.476	13.8043	3
27	-4.0594		84.6583	88.5115	83.4618	80.3918	114.713	128.865	123.055	127.858	110.217	121.908	111.267	113.152			-4.0594	103.196	9.35937	3	113.095	12.4547	3	105.928	11.7372	3	107.134	14.0288	3
28	-3.99273		83.3433	88.239	85.2401	80.7797	116.497	127.418	121.77	126.798	109.102	121.413	110.077	113.081			-3.99273	102.981	10.0481	3	112.357	12.1829	3	105.696	10.7705	3	106.886	13.6406	3
29	-3.92607		84.7978	89.3291	83.8174	80.5663	112.293	127.57	119.629	126.117	113.003	121.06	109.307	112.294			-3.92607	103.365	9.28569	3	112.653	11.8125	3	104.251	10.6425	3	106.326	13.4836	3
30	-3.8594		84.7978	88.6373	83.7186	80.6051	116.433	126.657	119.914	125.057	112.384	121.484	109.657	113.367			-3.8594	104.538	9.93922	3	112.259	11.905	3	104.43	10.7707	3	106.343	13.304	3
31	-3.79273		84.8575	87.5052	84.0743	80.6245	113.822	126.428	119.843	125.814	109.04	118.516	109.517	111.651			-3.79273	102.573	8.9647	3	110.816	11.8773	3	104.478	10.6285	3	106.03	13.3444	3
32	-3.72607		84.5786	88.9937	83.4618	79.9457	112.739	128.332	120.414	123.013	106.068	120.565	110.427	110.936			-3.72607	101.129	8.49608	3	112.63	12.0291	3	104.768	11.0361	3	104.632	12.8259	3
33	-3.6596		83.7019	88.847	83.6989	81.187	115.414	127.037	118.415	126.798	107.121	119.081	109.867	109.435			-3.6596	102.079	9.49524	3	111.655	11.6331	3	103.994	10.4432	3	105.807	13.2912	3
34	-3.59293		83.9211	87.9036	83.4222	80.256	117.134	125.133	120.2	124.981	108.483	117.385	109.237	113.295			-3.59293	103.179	9.94766	3	110.141	11.3413	3	104.286	10.9015	3	106.177	13.3925	3
35	-3.52602		84.2399	88.6792	83.0468	79.8875	111.847	123.534	121.413	123.543	106.935	119.293	111.617	111.008			-3.52602	101.007	8.50279	3	110.502	10.9799	3	105.359	11.5089	3	104.813	12.9773	3
36	-3.45935		85.2959	88.5325	83.936	80.2948	112.93	124.981	117.63	123.543	109.536	117.809	109.587	108.363			-3.45935	102.587	8.70097	3	110.441	11.1481	3	103.718	10.1598	3	104.067	12.6681	3
37	-3.39268		84.1602	88.3438	82.4738	81.8464	112.803	124.981	118.986	124.073	105.077	115.406	109.797	111.651			-3.39268	100.68	8.55566	3	109.577	10.9705	3	103.752	10.965	3	105.857	12.5293	3
38	-3.32602		85.8338	88.7631	84.509	80.7991	111.529	125.971	116.203	123.013	106.811	114.912	110.637	112.866			-3.32602	101.391	7.897	3	109.882	11.0315	3	103.783	9.76995	3	105.559	12.722	3
39	-3.25958		84.1203	87.7358	83.4815	79.8875	110.446	124.905	117.131	118.925	104.149	116.113	111.477	109.936			-3.25958	99.5716	7.93663	3	109.585	11.2153	3	104.03	10.4029	3	102.916	11.8031	3
40	-3.19267		84.3395	89.0566	83.3432	80.3918	111.975	125.895	116.131	119.606	105.449	117.739	109.867	109.149			-3.19267	100.588	8.33961	3	110.897	11.171	3	103.114	10.0494	3	103.049	11.724	3
41	-3.12627		82.7854	88.847	83.6594	79.0147	110.127	123.153	118.201	120.893	107.368	116.537	110.287	111.365			-3.12627	100.094	8.69073	3	109.512	10.5077	3	104.049	10.4478	3	103.758	12.6736	3
42	-3.0596		84.1602	87.631	83.7384	80.5081	111.783	122.62	118.344	120.59	104.892	116.89	109.657	113.51			-3.0596	100.278	8.30104	3	109.047	10.8351	3	103.913	10.3944	3	104.869	12.351	3
43	-2.99273		84.3196	88.239	82.948	80.2948	113.057	123.305	119.415	119.455	107.678	118.163	109.797	110.793			-2.99273	101.685	8.82046	3	109.902	10.9329	3	104.053	10.9117	3	103.514	11.876	3
44	-2.92607		83.6023	87.9455	83.1851	79.4026	112.293	124.372	115.846	117.79	104.272	115.689	109.867	110.079			-2.92607	100.056	8.5464	3	109.335	10.9847	3	102.966	10.0399	3	102.424	11.7237	3
45	-2.8594		83.7418	87.5681	82.1972	80.2366	109.618	122.468	116.488	120.212	103.529	114.276	108.817	108.935			-2.8594	98.963	7.81091	3	108.104	10.5366	3	102.501	10.3906	3	103.128	11.8996	3
46	-2.79272		82.8053	87.5052	81.9798	79.2669	112.611	123.001	117.131	116.881	104.706	114.064	109.447	109.292			-2.79272	100.041	8.91484	3	108.19	10.6593	3	102.853	10.6694	3	101.813	11.4842	3
47	-2.72605		84.2598	88.1132	81.9798	79.1311	112.229	122.62	116.916	115.443	102.91	118.375	107.348	110.508			-2.72605	99.7998	8.22251	3	109.703	10.864	3	102.081	10.4234	3	101.694	11.371	3
48	-2.65938		85.2361	86.2893	83.1851	79.0341	109.618	120.411	117.63	118.774	101.3	116.678	109.167	110.007			-2.65938	98.7181	7.15583	3	107.793	10.8057	3	103.328	10.3633	3	102.605	12.0541	3
49	-2.59272		82.4866	88.0084	82.2367	79.8875	110.191	122.772	115.703	114.762	105.139	114.558	107.698	111.222			-2.59272	99.2723	8.51864	3	108.446	10.4905	3	101.879	10.0895	3	101.957	11.082	3
50	-1.53142		93.1261	104.151	94.1711	94.2009	106.178	120.716	112.491	114.232	100	108.693	103.499	108.578			-1.53142	99.7681	3.76962	3	111.186	4.94181	3	103.387	5.28882	3	105.67	5.96231	3
51	-1.48777		92.2694	102.914	93.5388	95.2483	105.86	118.736	109.065	109.841	100.062	109.329	103.779	106.505			-1.48777	99.3971	3.9373	3	110.326	4.59448	3	102.128	4.55743	3	103.865	4.41453	3
52	-1.44427		91.313	105.157	92.9658	93.4057	105.159	118.431	108.994	109.084	100.248	106.572	105.668	105.504			-1.44427	98.9066	4.0529	3	110.054	4.20864	3	102.543	4.88365	3	102.665	4.74336	3
53	-1.4008		91.6916	103.501	92.4521	93.2312	107.134	120.259	109.35	110.068	99.3189	107.845	104.339	108.077			-1.4008	99.3814	4.4579	3	110.535	5.02112	3	102.047	5.01091	3	103.792	5.31167	3
54	-1.35703		92.5682	103.753	92.2743	94.2979	102.675	116.832	108.708	109.992	99.195	108.693	104.479	106.147			-1.35703	98.1462	2.96439	3	109.759	3.81307	3	101.82	4.92673	3	103.479	4.72292	3
55	-1.31355		92.3491	102.495	92.788	94.6664	106.115	117.441	108.779	108.024	99.8762	106.502	104.409	105.075			-1.31355	99.4466	3.97957	3	108.813	4.46661	3	101.992	4.77185	3	102.589	4.05153	3
56	-1.27007		93.2656	102.243	93.1832	93.27	103.631	116.222	107.994	111.355	98.3282	111.095	104.759	106.791			-1.27007	98.4081	2.99239	3	109.854	4.08293	3	101.979	4.49586	3	103.805	5.4299	3
57	-1.2263		92.6479	100.985	91.4839	93.7355	101.465	116.222	106.995	108.933	98.1424	108.339	102.939	104.789			-1.2263	97.4185	2.57088	3	108.516	4.39946	3	100.473	4.64439	3	102.486	4.53569	3
58	-1.18282		92.3491	102.516	91.7605	93.7548	102.803	115.994	108.28	109.614	97.5232	108.057	103.149	105.075			-1.18282	97.5583	3.0177	3	108.855	3.91127	3	101.063	4.88143	3	102.815	4.71557	3
59	-1.13907		92.5483	102.306	90.654	92.2033	103.312	114.851	106.567	106.51	99.257	105.371	101.12	103.574			-1.13907	98.3725	3.13855	3	107.51	3.7761	3	99.4468	4.66913	3	100.762	4.36274	3
60	-1.09558		93.1859	104.025	90.6145	92.9015	100.255	115.08	105.71	104.996	97.8328	104.382	102.099	103.217			-1.09558	97.0912	2.07404	3	107.829	3.62699	3	99.4747	4.55107	3	100.371	3.77014	3
61	-1.0521		92.4088	103.438	91.8988	93.076	104.713	113.861	106.638	104.466	97.0898	104.664	102.659	98.9993			-1.0521	98.0707	3.58572	3	107.321	3.28915	3	100.399	4.40242	3	98.8472	3.28897	3
62	-1.0086		92.0701	101.237	90.5355	91.796	99.6178	111.805	106.21	103.407	97.7709	103.039	101.47	99.9285			-1.0086	96.4863	2.27154	3	105.36	3.26408	3	99.405	4.64108	3	98.377	3.44028	3
63	-0.965117		92.2295	101.342	89.9427	94.007	100.318	110.129	105.639	105.299	96.6563	103.463	99.7201	101.787			-0.965117	96.4015	2.33856	3	104.978	2.64752	3	98.4339	4.57649	3	100.364	3.33644	3
64	-0.921367		91.9705	101.866	90.4959	92.3972	99.172	114.928	103.141	106.283	95.9752	114.205	99.3702	100.572			-0.921367	95.7059	2.08324	3	110.333	4.23862	3	97.6689	3.748	3	99.7507	4.02948	3
65	-0.877883		92.0901	101.447	90.3972	93.6773	100.51	111.577	103.141	103.936	97.7709	110.53	97.6907	100.572			-0.877883	96.7902	2.47948	3	107.851	3.21647	3	97.0761	3.69153	3	99.3952	3.01943	3
66	-0.834133		92.8472	101.321	89.7649	92.533	99.5541	114.623	103.997	105.375	96.2848	104.594	101.19	99.4996			-0.834133	96.2287	1.93634	3	106.846	4.00173	3	98.3172	4.35228	3	99.1358	3.71155	3
67	-0.790633		91.8709	99.979	90.5552	93.0954	98.7261	111.957	105.782	103.785	94.613	100.283	100.42	100.572			-0.790633	95.07	1.99208	3	104.073	3.94312	3	98.9189	4.45908	3	99.1507	3.16656	3
68	-0.7469		90.9743	99.434	89.6858	90.4383	98.4076	110.891	103.712	104.315	96.3467	101.979	98.2505	97.9271			-0.7469	95.2429	2.21566	3	104.101	3.47348	3	97.216	4.0818	3	97.5601	4.01002	3
69	-0.7034		93.5844	98.847	91.2073	91.2529	97.2611	109.901	103.498	103.255	93.3127	103.534	98.8803	97.7841			-0.7034	94.7194	1.27329	3	104.094	3.2033	3	97.8617	3.58426	3	97.4307	3.46924	3
70	0		100	100	100	100	100	100	100	100	100	100	100	100			0	100	0	3	100	0	3	100	0	3	100	0	3
71	0.0436167		101.176	98.5325	99.0318	98.7587	103.121	100.457	101.071	99.3187	96.3467	96.2544	99.2302	92.995			0.0436167	100.214	2.01373	3	98.4146	1.21461	3	99.7776	0.649092	3	97.0241	2.02105	3
72	0.0871		101.136	97.9245	98.9528	99.5733	100.573	97.639	100	98.1075	98.8235	93.5689	98.2505	91.9943			0.0871	100.177	0.696175	3	96.3775	1.4067	3	99.0678	0.508293	3	96.5584	2.32094	3
73	0.130583		101.773	95.9329	97.2337	98.4872	98.9809	95.3542	96.5025	96.8963	98.8854	93.3569	96.501	92.4946			0.130583	99.8799	0.947111	3	94.8813	0.780309	3	96.7458	0.243992	3	95.9594	1.79221	3
74	0.174333		101.036	94.1719	96.8188	97.3623	98.7898	92.003	96.4311	97.2748	97.8947	90.8127	94.3317	93.4239			0.174333	99.2402	0.934378	3	92.3292	0.983333	3	95.8605	0.772571	3	96.0203	1.29847	3
75	0.217817		100.339	93.0398	94.9022	97.3623	98.6624	90.8606	96.217	97.2748	97.0898	87.9859	93.0021	90.4217			0.217817	98.697	0.938041	3	90.6288	1.46355	3	94.7071	0.933171	3	95.0196	2.29908	3
76	0.261567		100.418	92.7463	95.5542	96.2762	101.847	87.6618	95.5032	97.0477	97.0898	88.2686	93.492	90.0643			0.261567	99.7851	1.40935	3	89.5589	1.60331	3	94.8498	0.679085	3	94.4627	2.21045	3
77	0.305067		99.8605	90.7757	95.4554	95.9659	99.6178	87.0526	94.2898	94.9281	96.7802	89.682	92.9321	90.2073			0.305067	98.7528	0.988815	3	89.1701	1.10483	3	94.2258	0.729122	3	93.7004	1.77207	3
78	0.3488		99.8805	90.7338	94.5663	96.6059	102.038	87.738	95.5746	94.0197	98.5139	85.6537	91.1826	91.1365			0.3488	100.144	1.02588	3	88.0418	1.47433	3	93.7745	1.32822	3	93.9207	1.57965	3
79	0.3923		100.917	90.587	95.3171	95.3258	97.7707	84.7677	94.6467	93.0356	99.5666	84.5936	90.6928	88.9207			0.3923	99.4179	0.91115	3	86.6495	1.96942	3	93.5522	1.44275	3	92.4274	1.87386	3
80	0.43605		99.9801	89.8113	93.9538	95.6943	99.3631	85.7578	94.2898	92.43	98.2663	84.735	90.2729	86.7048			0.43605	99.2031	0.501161	3	86.768	1.55002	3	92.8388	1.28661	3	91.6097	2.62727	3
81	0.479817		98.7647	88.239	94.8232	94.0458	97.9618	83.473	92.5767	90.8403	95.418	82.4028	88.2435	88.2773			0.479817	97.3815	1.00875	3	84.7049	1.79383	3	91.8811	1.93096	3	91.0545	1.66864	3
82	0.523283		102.61	88.5744	92.8868	94.8991	98.3439	82.9398	91.7916	90.4618	96.7802	83.8163	86.9839	86.2044			0.523283	99.2447	1.74218	3	85.1102	1.75051	3	90.5541	1.81287	3	90.5218	2.51013	3
83	0.566783		99.8207	85.7862	91.2863	95.481	97.7707	80.8835	93.2191	93.0356	97.4613	80	85.0245	87.0622			0.566783	98.3509	0.740301	3	82.2232	1.79964	3	89.8433	2.47317	3	91.8596	2.50042	3
84	0.610533		101.056	86.457	92.4718	93.9488	97.3885	82.4829	90.7923	90.2347	98.5759	78.7279	87.8237	85.2752			0.610533	99.0068	1.08041	3	82.5559	2.2315	3	90.3626	1.35891	3	89.8196	2.51244	3
85	0.654017		101.474	84.13	93.8155	93.8518	101.656	79.8172	90.6495	88.4936	96.2848	76.8905	87.2638	86.5618			0.654017	99.8051	1.76092	3	80.2792	2.1026	3	90.5763	1.89165	3	89.6357	2.18055	3
86	0.697767		101.574	83.4801	92.0174	94.6276	96.242	79.5887	88.2227	89.5534	96.4706	76.3958	83.9048	85.5611			0.697767	98.0955	1.74048	3	79.8215	2.04838	3	88.0483	2.34352	3	89.914	2.62348	3
87	0.741517		101.235	82.6415	90.5947	93.2312	96.242	79.5126	87.8658	89.1749	96.0372	76.9611	85.5143	83.5597			0.741517	97.8382	1.6996	3	79.7051	1.64261	3	87.9916	1.46793	3	88.6552	2.80398	3
88	0.785		101.195	83.1866	89.3104	92.9597	98.9172	78.751	87.5803	87.888	95.7895	79.2226	83.5549	84.203			0.785	98.6341	1.56699	3	80.3867	1.40654	3	86.8152	1.70493	3	88.3502	2.53837	3
89	0.8285		100.538	82.1174	91.3653	92.4554	97.1338	78.294	88.2941	88.4179	95.1084	76.6784	84.6046	84.346			0.8285	97.5934	1.58416	3	79.0299	1.61264	3	88.088	1.95437	3	88.4064	2.341	3
90	0.87225		101.594	81.5514	89.0338	92.1451	96.8153	78.3701	87.7944	87.0553	96.0372	74.0636	84.3947	81.6297			0.87225	98.1488	1.73714	3	77.995	2.16965	3	87.0743	1.38676	3	86.9434	3.03603	3
91	0.915733		99.3425	81.2369	89.6661	92.5912	95.4777	77.0754	86.7238	86.4497	95.4799	73.7102	83.415	82.2016			0.915733	96.7667	1.2879	3	77.3409	2.17681	3	86.6016	1.80557	3	87.0808	3.01577	3
92	0.959483		100.518	79.8532	90.3774	91.6408	95.9873	78.294	84.2969	85.9198	95.1703	74.6996	82.9951	80.9864			0.959483	97.2252	1.66322	3	77.6156	1.52589	3	85.8898	2.27505	3	86.1823	3.07846	3
93	1.00323		100.398	78.5744	88.1644	91.6214	97.2611	77.5324	87.152	84.4815	94.1796	73.3569	82.4353	83.4167			1.00323	97.2797	1.79527	3	76.4879	1.59414	3	85.9172	1.76534	3	86.5065	2.57584	3
94	1.04672		99.3226	78.3019	89.2907	91.7378	95.7325	77.6085	85.7245	86.6011	94.1176	73.3569	81.6655	82.9164			1.04672	96.3909	1.53817	3	76.4224	1.54579	3	85.5602	2.20272	3	87.0851	2.558	3
95	1.09022		100.418	76.8973	89.8834	90.6129	96.4331	76.3899	84.0114	84.0273	93.6223	72.8622	81.8754	81.1294			1.09022	96.8246	1.97161	3	75.3831	1.26895	3	85.2568	2.3941	3	85.2565	2.8058	3
96	1.13397		100.956	78.4906	87.1172	88.3437	95.5414	75.2475	85.0107	85.617	96.3467	71.1661	82.2953	81.4153			1.13397	97.6149	1.68687	3	74.9681	2.11901	3	84.8077	1.39565	3	85.1253	2.0151	3
97	1.17768		101.992	76.6876	86.5639	88.9643	95.1592	74.5621	85.0821	84.9357	93.87	71.0954	81.7355	80.0572			1.17768	97.0072	2.52023	3	74.115	1.62974	3	84.4605	1.42808	3	84.6524	2.57516	3
98	1.22118		100.339	76.1216	86.801	89.3328	97.1338	73.572	83.5118	83.0431	92.4458	70.3887	80.9657	79.9142			1.22118	96.6394	2.29185	3	73.3607	1.65831	3	83.7595	1.68906	3	84.0967	2.76948	3
99	1.26492		101.733	74.696	87.1962	89.2164	95.3503	72.8865	84.9393	83.8002	92.6935	72.7915	81.3856	80.772			1.26492	96.5924	2.68248	3	73.458	0.619607	3	84.507	1.69125	3	84.5962	2.46999	3
100	1.30867		100.458	74.5702	88.3225	88.751	96.1783	74.0289	81.2991	83.0431	92.5077	71.5901	79.1463	77.5554			1.30867	96.3815	2.29737	3	73.3964	0.916576	3	82.9226	2.77054	3	83.1165	3.23209	3
101	1.35217		99.8805	74.2138	85.8724	87.3933	96.1146	72.658	82.3697	83.4974	93.808	69.47	79.5661	77.1265			1.35217	96.6011	1.76974	3	72.1139	1.3962	3	82.6027	1.82418	3	82.6724	2.99234	3
102	1.39592		101.813	73.6478	85.7538	87.2576	97.0701	72.1249	81.9415	82.4375	93.2508	69.5406	78.7964	78.4132			1.39592	97.378	2.47652	3	71.7711	1.19876	3	82.1639	2.01152	3	82.7028	2.5566	3
103	1.4394		100.339	74.3606	86.149	87.0442	97.7707	71.0586	82.2984	83.4217	94.0557	68.6926	81.2456	76.6976			1.4394	97.3884	1.82378	3	71.3706	1.64363	3	83.231	1.49031	3	82.3878	3.0312	3
104	1.48315		101.415	73.4382	85.655	87.1412	96.3057	71.9726	82.3697	80.7721	93.7461	68.9046	79.3562	77.9128			1.48315	97.1555	2.2541	3	71.4384	1.3357	3	82.4603	1.81888	3	81.942	2.72747	3
105	1.5269		100.219	73.501	84.4892	85.706	95.7325	71.5918	81.0136	83.4974	93.4985	67.6325	77.5367	76.8406			1.5269	96.4834	1.97611	3	70.9084	1.72821	3	81.0132	2.00701	3	82.0146	2.66443	3
106	1.5704		100.259	72.369	84.5683	85.8029	95.2229	70.3732	82.5839	82.6646	93.3746	67.9152	76.9769	76.5547			1.5704	96.2855	2.05714	3	70.2191	1.288	3	81.3764	2.27309	3	81.6741	2.7153	3
107	1.61388		100.518	71.0273	84.2916	85.1629	95.8599	70.754	81.2991	81.2263	93.1269	66.2898	76.4171	76.1258			1.61388	96.5016	2.15761	3	69.357	1.53565	3	80.6693	2.2949	3	80.8384	2.61599	3
108	1.65762		100.02	71.174	83.9557	85.4538	95.9873	69.9162	82.3697	81.9833	92.6935	66.8551	77.1868	78.1272			1.65762	96.2336	2.11853	3	69.3151	1.28247	3	81.1708	2.0439	3	81.8548	2.11599	3
109	1.70112		100.737	71.3208	83.7779	83.6889	98.4713	71.3633	81.2277	79.031	91.7647	65.0883	78.2365	76.6262			1.70112	96.9911	2.69381	3	69.2575	2.0846	3	81.0807	1.60135	3	79.782	2.07313	3
110	1.74487		100.498	70.0839	82.8097	84.4841	95.9873	69.0023	79.7288	82.8917	91.0836	66.5724	76.8369	78.2702			1.74487	95.8563	2.71852	3	68.5529	1.03827	3	79.7918	1.72448	3	81.882	1.8635	3
111	1.78835		99.0436	70.1258	83.0863	84.6393	98.2803	70.754	80.5139	79.8637	91.3932	64.8057	77.6767	77.6984			1.78835	96.239	2.43292	3	68.5618	1.88682	3	80.4257	1.56225	3	80.7338	2.05035	3
112	1.8321		100.159	71.4046	84.3114	83.1652	95.1592	70.5255	80.2284	78.8039	92.3839	64.311	76.9069	77.198			1.8321	95.9008	2.27502	3	68.747	2.23251	3	80.4822	2.14125	3	79.7224	1.78276	3
113	1.87587		99.5417	69.3082	82.4738	83.3398	94.3949	69.6116	79.3005	79.788	91.7028	65.4417	77.8167	74.3388			1.87587	95.2131	2.2996	3	68.1205	1.34225	3	79.8637	1.37358	3	79.1556	2.61754	3
114	1.91935		100.1	68.1971	82.0391	83.8247	94.0127	68.0883	80.0143	78.9553	92.8173	65.7244	78.3765	75.1966			1.91935	95.6432	2.25475	3	67.3366	0.806719	3	80.1433	1.05928	3	79.3255	2.49759	3
115	1.96283		101.654	68.9518	81.8218	83.7083	94.6497	68.0883	79.1577	78.6525	90.7121	63.4629	77.6067	74.2673			1.96283	95.6718	3.19966	3	66.8343	1.70405	3	79.5287	1.23084	3	78.8761	2.72766	3
116	2.00658		99.1233	67.3166	82.0589	82.4864	95.3503	68.9261	79.3005	78.8796	91.8266	65.159	75.8572	75.268			2.00658	95.4334	2.10679	3	67.1339	1.0913	3	79.0722	1.79389	3	78.878	2.08376	3
117	2.05007		100.159	66.6667	81.0907	82.4282	96.4331	69.0784	77.2305	80.3936	92.3839	64.8763	75.5073	75.6969			2.05007	96.3255	2.24524	3	66.8738	1.21746	3	77.9429	1.65065	3	79.5063	1.99317	3
118	2.09382		102.351	66.5199	80.9919	81.6524	95.0955	66.7936	79.015	80.3936	93.6842	64.0283	75.0175	75.1251			2.09382	97.0436	2.68483	3	65.7806	0.879718	3	78.3415	1.75724	3	79.0571	1.99928	3
119	2.13732		99.2827	65.9539	80.1027	81.0124	98.2803	67.1744	78.0871	78.3497	93.1269	64.0283	75.6473	73.8385			2.13732	96.8966	1.90694	3	65.7189	0.915783	3	77.9457	1.28812	3	77.7335	2.09373	3
120	2.18105		99.741	66.3103	81.9601	81.6718	94.2038	67.2506	77.6588	79.031	93.6223	62.5442	76.2771	73.8385			2.18105	95.8557	1.94988	3	65.3683	1.43794	3	78.632	1.71118	3	78.1804	2.30095	3
121	2.22455		99.7609	64.6331	81.3871	80.2366	94.1401	67.0982	77.4447	77.2899	91.7028	64.947	74.1078	72.2659			2.22455	95.2013	2.38592	3	65.5595	0.774714	3	77.6465	2.10378	3	76.5975	2.32685	3
122	2.27402		100.458	62.7044	79.9644	80.1202	96.5605	65.7273	77.4447	78.1226	90.7121	62.6855	73.8978	73.624			2.27402	95.9103	2.83222	3	63.7058	1.01081	3	77.1023	1.75962	3	77.289	1.92107	3
123	2.34068		99.5019	64.3606	79.6878	80.1978	95.0318	66.7174	77.3733	77.2899	91.7647	61.8375	73.5479	73.1237			2.34068	95.4328	2.24251	3	64.3052	1.409	3	76.8697	1.79023	3	76.8705	2.05288	3
124	2.40737		99.5019	63.9623	79.7076	80.2948	94.1401	66.1843	75.5175	78.1226	92.322	62.8975	74.2477	75.6969			2.40737	95.3213	2.15516	3	64.348	0.968219	3	76.4909	1.64956	3	78.0381	1.32796	3
125	2.47403		99.3226	62.9979	78.364	78.8984	93.5669	66.1843	77.8016	78.1983	92.1362	65.583	73.5479	71.837			2.47403	95.0086	2.19619	3	64.9218	0.977459	3	76.5712	1.5203	3	76.3112	2.24622	3
126	2.54095		99.482	62.2851	80.0237	79.3057	95.4777	67.3267	77.1592	76.5329	90.1548	62.1201	75.3674	72.1944			2.54095	95.0382	2.70148	3	63.9107	1.7087	3	77.5168	1.356	3	76.011	2.06936	3
127	2.60753		99.6613	60.4612	79.9249	79.8487	93.121	64.9657	76.0885	75.7002	93.9319	61.4841	74.1078	73.1237			2.60753	95.5714	2.0583	3	62.3037	1.36338	3	76.7071	1.70751	3	76.2242	1.95896	3
128	2.6742		98.6451	61.0063	77.5341	79.5966	94.5223	65.8035	74.3754	75.7759	90.7121	60.424	73.5479	71.837			2.6742	94.6265	2.29068	3	62.4113	1.70442	3	75.1525	1.21452	3	75.7365	2.24008	3
129	2.74087		99.7609	58.8889	76.8623	78.7238	97.3248	64.6611	76.0171	74.8675	92.322	64.6643	72.2183	72.6948			2.74087	96.4692	2.18963	3	62.7381	1.9246	3	75.0326	1.42812	3	75.4287	1.76291	3
130	2.80753		99.2628	58.1132	78.6406	78.3941	94.5223	67.0982	75.3034	76.76	91.2074	60.7067	73.268	70.9793			2.80753	94.9975	2.33749	3	61.9727	2.66988	3	75.7373	1.56603	3	75.3778	2.24928	3
131	2.8742		98.167	57.5472	77.2772	78.4911	95.9873	64.6611	75.3747	76.0787	90.9598	59.788	71.9384	71.4081			2.8742	95.038	2.134	3	60.6654	2.09995	3	74.8635	1.56224	3	75.326	2.07902	3
132	2.94087		98.9241	57.086	77.9688	76.0279	93.5032	64.5849	75.3034	75.3217	92.322	61.5548	71.0287	72.2659			2.94087	94.9164	2.03264	3	61.0752	2.17801	3	74.7669	2.0213	3	74.5385	1.15445	3
133	3.00753		98.9639	56.7086	76.4869	77.114	95.2229	63.5948	75.6602	76.3815	90.4644	59.8587	70.8887	72.7663			3.00753	94.8838	2.45946	3	60.054	1.99028	3	74.3453	1.74467	3	75.4206	1.34392	3
134	3.0742		98.0673	56.2893	77.8897	76.6292	94.7771	65.0419	73.8758	74.3376	91.6409	58.3746	72.2183	73.1951			3.0742	94.8284	1.85534	3	59.9019	2.63954	3	74.6613	1.68365	3	74.7206	1.00965	3
135	3.14087		99.2429	56.1216	76.4078	76.8231	93.5669	64.9657	74.9465	74.0348	92.6935	59.0813	72.5682	69.8356			3.14087	95.1678	2.0531	3	60.0562	2.5992	3	74.6408	1.11888	3	73.5645	2.03078	3
136	3.20753		99.3226	55.3459	75.7953	76.9395	96.4331	62.8332	73.5189	74.489	90.2786	59.1519	70.7488	71.4796			3.20753	95.3448	2.66687	3	59.1104	2.1615	3	73.3543	1.45913	3	74.3027	1.57888	3
137	3.2742		97.0711	54.9266	75.084	76.1831	93.758	62.9094	75.3034	73.732	90.8359	60	70.2589	72.0515			3.2742	93.8883	1.80113	3	59.2787	2.33248	3	73.5487	1.64613	3	73.9889	1.19959	3
138	3.34087		96.6726	54.8218	75.5384	75.5431	94.8408	62.4524	74.5896	75.246	89.5975	59.1519	70.7488	71.1937			3.34087	93.7036	2.12007	3	58.8087	2.20944	3	73.6256	1.46426	3	73.9943	1.4029	3
139	3.40753		99.1034	54.109	74.669	74.8254	91.9745	62.5286	72.9479	73.732	90.774	59.8587	72.2883	70.336			3.40753	93.9506	2.59959	3	58.8321	2.48412	3	73.3017	0.709667	3	72.9645	1.35163	3
140	3.4742		97.3102	53.1237	75.4396	74.9806	95.7962	63.5187	73.0193	73.4292	91.3932	57.3852	71.7285	72.1944			3.4742	94.8332	1.77467	3	58.0092	3.01695	3	73.3958	1.08774	3	73.5348	0.806033	3
141	3.54087		99.2628	53.5849	74.2343	75.2521	92.8025	61.7669	73.5903	73.0507	92.3839	56.8198	71.9384	71.1937			3.54087	94.8164	2.22647	3	57.3905	2.37913	3	73.2544	0.683728	3	73.1655	1.17297	3
142	3.60752		99.5218	52.3061	74.0763	74.5345	93.8217	61.8431	71.8059	74.2619	92.322	56.1837	69.7691	70.1215			3.60752	95.2218	2.19315	3	56.7776	2.76907	3	71.8837	1.24399	3	72.9727	1.42774	3
143	3.6742		98.7846	52.6415	74.9654	74.7091	93.6306	61.0053	71.9486	73.6563	92.5697	56.1837	70.8188	70.6934			3.6742	94.995	1.91943	3	56.6102	2.42382	3	72.5776	1.23766	3	73.0196	1.20216	3
144	3.74087		98.2467	52.7673	74.0565	74.3988	92.4841	62.0716	71.3776	74.4133	90.1548	56.8905	69.5591	69.4067			3.74087	93.6285	2.40498	3	57.2431	2.6917	3	71.6644	1.30618	3	72.7396	1.66645	3
145	3.80752		98.5256	51.6352	74.2936	73.2351	90.7643	61.4623	71.8059	73.6563	89.4737	57.1731	69.7691	68.263			3.80752	92.9212	2.82686	3	56.7569	2.84446	3	71.9562	1.30829	3	71.7181	1.73182	3
146	3.87418		98.5455	51.8658	73.7404	73.5454	92.6115	60.7007	71.8059	71.9909	90.6502	55.4064	69.3492	69.8356			3.87418	93.9357	2.37343	3	55.991	2.5671	3	71.6318	1.27061	3	71.7906	1.07559	3
147	3.94085		98.3861	51.5933	73.2662	73.5454	93.4395	60.853	72.0914	72.3694	91.517	55.3357	69.6291	70.05			3.94085	94.4476	2.04599	3	55.9273	2.68937	3	71.6622	1.07163	3	71.9883	1.02686	3
148	4.00752		98.1869	51.9287	72.5351	73.1187	91.2102	59.3298	71.6631	74.0348	88.7307	55.477	69.6291	69.2638			4.00752	92.7092	2.83081	3	55.5785	2.1371	3	71.2758	0.860944	3	72.1391	1.46179	3
149	4.07418		97.3301	51.0692	73.5033	74.069	92.0382	61.3861	72.6624	71.3853	90.4025	56.1131	68.1596	68.406			4.07418	93.257	2.09062	3	56.1895	2.97849	3	71.4417	1.65895	3	71.2868	1.63552	3
150	5.47742		91.3529	11.8658	12.4877	13.9449	74.2675	27.9513	25.6246	30.3558	71.1455	26.5724	26.802	30.0214			5.47742	78.922	6.28045	3	22.1298	5.14742	3	21.6381	4.58781	3	24.774	5.41543	3
151	5.52102		92.0901	11.782	12.7445	14.1389	74.0764	28.5605	25.0535	30.7343	69.969	27.3498	26.4521	29.95			5.52102	78.7118	6.79338	3	22.5641	5.40239	3	21.4167	4.35485	3	24.941	5.40583	3
152	5.5645		92.628	11.5723	12.4284	14.1389	73.6306	29.1698	26.0528	31.2642	71.0217	27.9859	27.0119	30.2359			5.5645	79.0934	6.80907	3	22.9093	5.6788	3	21.831	4.70948	3	25.213	5.54501	3
153	5.608		91.3329	11.3417	12.3493	14.1583	75.0318	28.3321	26.4097	32.0212	70.7121	27.2792	26.592	30.5933			5.608	79.0256	6.27874	3	22.3176	5.49637	3	21.7837	4.71747	3	25.5909	5.73117	3
154	5.65173		92.2495	11.0692	12.3691	14.8759	73.5669	28.2559	26.3383	31.6427	70.8359	27.9859	27.0119	31.6655			5.65173	78.8841	6.72903	3	22.437	5.68444	3	21.9064	4.77263	3	26.0613	5.59274	3
155	5.6955		92.9269	11.153	12.4877	14.5849	74.3949	27.4943	26.6238	31.9455	70.7121	27.1378	27.5017	30.8077			5.6955	79.3446	6.87384	3	21.9284	5.38865	3	22.2044	4.86499	3	25.7794	5.60685	3
156	5.73898		92.5682	10.9434	12.3098	14.5656	73.0573	27.7989	26.1242	31.7184	71.2693	29.47	27.3618	31.3081			5.73898	78.965	6.82119	3	22.7374	5.91671	3	21.9319	4.8243	3	25.864	5.65047	3
157	5.78273		92.4288	11.1321	12.4877	14.3328	72.4204	27.7228	26.4811	32.2483	70.4025	27.5618	27.9216	30.3788			5.78273	78.4172	7.02996	3	22.1389	5.5036	3	22.2968	4.92216	3	25.6533	5.68592	3
158	5.82648		91.851	11.0482	12.5667	14.488	70.3822	28.2559	26.9807	32.0212	69.6594	28.0565	27.8516	30.5218			5.82648	77.2975	7.27971	3	22.4536	5.70296	3	22.4664	4.95621	3	25.677	5.61123	3
159	5.86997		92.7476	11.0273	12.705	14.9535	71.8471	27.2658	25.9101	32.0969	70.7121	27.7032	27.7117	30.7362			5.86997	78.4356	7.16348	3	21.9987	5.4872	3	22.1089	4.73063	3	25.9289	5.50175	3
160	5.91372		91.2732	11.0063	12.6457	14.9535	73.3121	27.4943	26.6238	31.7184	71.6409	26.7138	27.1519	31.6655			5.91372	78.742	6.2841	3	21.7381	5.37064	3	22.1405	4.74982	3	26.1124	5.57952	3
		RAW	Mn (uM) /Ca (mM)				Mn (uM) /Ca (mM)				Mn (uM) /Ca (mM)
			0/0	50/0	50/0.5	50/2	0/0	50/0	50/0.5	50/2	0/0	50/0	50/0.5	50/2
			4424	4460	4376	4410	2290	2150	2149	2127	2236	2176	1820	1783
			4372	4415	4322	4319	2235	2071	2092	2097	2184	2119	1809	1759
			4425	4443	4319	4313	2215	2125	2080	2101	2209	2111	1795	1774
			4353	4365	4338	4286	2172	2047	2033	2041	2186	2147	1750	1692
			4368	4419	4245	4267	2159	2020	2003	2035	2194	2082	1744	1667
			4390	4364	4311	4272	2075	1998	1993	2022	2112	2023	1740	1655
			4307	4364	4263	4310	2077	1940	1964	2006	2090	2031	1685	1650
			4397	4404	4332	4272	2056	1939	1952	1952	2076	2019	1690	1629
			4306	4358	4221	4248	2043	1933	1919	1907	2044	1978	1694	1620
			4345	4300	4233	4267	2015	1899	1891	1901	2030	1999	1677	1635
			4325	4288	4258	4205	1978	1877	1923	1867	1983	1964	1685	1620
			4294	4276	4192	4168	1978	1875	1853	1860	1968	1969	1698	1589
			4296	4258	4255	4204	1961	1837	1880	1880	1978	1963	1632	1619
			4339	4301	4311	4192	1977	1877	1847	1833	1906	1953	1620	1631
			4296	4251	4214	4215	1928	1815	1851	1822	1904	1916	1635	1606
			4275	4244	4196	4228	1941	1788	1823	1847	1918	1959	1645	1584
			4292	4285	4215	4256	1928	1817	1849	1822	1878	1898	1655	1627
			4335	4226	4226	4136	1933	1776	1813	1786	1863	1870	1623	1609
			4235	4315	4234	4130	1877	1764	1795	1783	1841	1846	1624	1599
			4205	4249	4274	4186	1877	1736	1794	1735	1833	1803	1608	1604
			4285	4322	4226	4173	1851	1711	1755	1735	1831	1826	1603	1567
			4227	4302	4251	4174	1879	1706	1741	1766	1811	1775	1605	1602
			4231	4198	4272	4178	1847	1725	1748	1712	1798	1811	1629	1598
			4268	4248	4304	4173	1874	1698	1731	1695	1768	1773	1575	1592
			4248	4252	4263	4169	1818	1708	1754	1718	1801	1748	1571	1572
			4220	4229	4253	4161	1810	1671	1719	1690	1793	1752	1582	1550
			4249	4222	4224	4145	1801	1692	1724	1689	1780	1725	1590	1583
			4183	4209	4314	4165	1829	1673	1706	1675	1762	1718	1573	1582
			4256	4261	4242	4154	1763	1675	1676	1666	1825	1713	1562	1571
			4256	4228	4237	4156	1828	1663	1680	1652	1815	1719	1567	1586
			4259	4174	4255	4157	1787	1660	1679	1662	1761	1677	1565	1562
			4245	4245	4224	4122	1770	1685	1687	1625	1713	1706	1578	1552
			4201	4238	4236	4186	1812	1668	1659	1675	1730	1685	1570	1531
			4212	4193	4222	4138	1839	1643	1684	1651	1752	1661	1561	1585
			4228	4230	4203	4119	1756	1622	1701	1632	1727	1688	1595	1553
			4281	4223	4248	4140	1773	1641	1648	1632	1769	1667	1566	1516
			4224	4214	4174	4220	1771	1641	1667	1639	1697	1633	1569	1562
			4308	4234	4277	4166	1751	1654	1628	1625	1725	1626	1581	1579
			4222	4185	4225	4119	1734	1640	1641	1571	1682	1643	1593	1538
			4233	4248	4218	4145	1758	1653	1627	1580	1703	1666	1570	1527
			4155	4238	4234	4074	1729	1617	1656	1597	1734	1649	1576	1558
			4224	4180	4238	4151	1755	1610	1658	1593	1694	1654	1567	1588
			4232	4209	4198	4140	1775	1619	1673	1578	1739	1672	1569	1550
			4196	4195	4210	4094	1763	1633	1623	1556	1684	1637	1570	1540
			4203	4177	4160	4137	1721	1608	1632	1588	1672	1617	1555	1524
			4156	4174	4149	4087	1768	1615	1641	1544	1691	1614	1564	1529
			4229	4203	4149	4080	1762	1610	1638	1525	1662	1675	1534	1546
			4278	4116	4210	4075	1721	1581	1648	1569	1636	1651	1560	1539
			4140	4198	4162	4119	1730	1612	1621	1516	1698	1621	1539	1556
			4674	4968	4766	4857	1667	1585	1576	1509	1615	1538	1479	1519
			4631	4909	4734	4911	1662	1559	1528	1451	1616	1547	1483	1490
			4583	5016	4705	4816	1651	1555	1527	1441	1619	1508	1510	1476
			4602	4937	4679	4807	1682	1579	1532	1454	1604	1526	1491	1512
			4646	4949	4670	4862	1612	1534	1523	1453	1602	1538	1493	1485
			4635	4889	4696	4881	1666	1542	1524	1427	1613	1507	1492	1470
			4681	4877	4716	4809	1627	1526	1513	1471	1588	1572	1497	1494
			4650	4817	4630	4833	1593	1526	1499	1439	1585	1533	1471	1466
			4635	4890	4644	4834	1614	1523	1517	1448	1575	1529	1474	1470
			4645	4880	4588	4754	1622	1508	1493	1407	1603	1491	1445	1449
			4677	4962	4586	4790	1574	1511	1481	1387	1580	1477	1459	1444
			4638	4934	4651	4799	1644	1495	1494	1380	1568	1481	1467	1385
			4621	4829	4582	4733	1564	1468	1488	1366	1579	1458	1450	1398
			4629	4834	4552	4847	1575	1446	1480	1391	1561	1464	1425	1424
			4616	4859	4580	4764	1557	1509	1445	1404	1550	1616	1420	1407
			4622	4839	4575	4830	1578	1465	1445	1373	1579	1564	1396	1407
			4660	4833	4543	4771	1563	1505	1457	1392	1555	1480	1446	1392
			4611	4769	4583	4800	1550	1470	1482	1371	1528	1419	1435	1407
			4566	4743	4539	4663	1545	1456	1453	1378	1556	1443	1404	1370
			4697	4715	4616	4705	1527	1443	1450	1364	1507	1465	1413	1368
			5019	4770	5061	5156	1570	1313	1401	1321	1615	1415	1429	1399
			5078	4700	5012	5092	1619	1319	1416	1312	1556	1362	1418	1301
			5076	4671	5008	5134	1579	1282	1401	1296	1596	1324	1404	1287
			5108	4576	4921	5078	1554	1252	1352	1280	1597	1321	1379	1294
			5071	4492	4900	5020	1551	1208	1351	1285	1581	1285	1348	1307
			5036	4438	4803	5020	1549	1193	1348	1285	1568	1245	1329	1265
			5040	4424	4836	4964	1599	1151	1338	1282	1568	1249	1336	1260
			5012	4330	4831	4948	1564	1143	1321	1254	1563	1269	1328	1262
			5013	4328	4786	4981	1602	1152	1339	1242	1591	1212	1303	1275
			5065	4321	4824	4915	1535	1113	1326	1229	1608	1197	1296	1244
			5018	4284	4755	4934	1560	1126	1321	1221	1587	1199	1290	1213
			4957	4209	4799	4849	1538	1096	1297	1200	1541	1166	1261	1235
			5150	4225	4701	4893	1544	1089	1286	1195	1563	1186	1243	1206
			5010	4092	4620	4923	1535	1062	1306	1229	1574	1132	1215	1218
			5072	4124	4680	4844	1529	1083	1272	1192	1592	1114	1255	1193
			5093	4013	4748	4839	1596	1048	1270	1169	1555	1088	1247	1211
			5098	3982	4657	4879	1511	1045	1236	1183	1558	1081	1199	1197
			5081	3942	4585	4807	1511	1044	1231	1178	1551	1089	1222	1169
			5079	3968	4520	4793	1553	1034	1227	1161	1547	1121	1194	1178
			5046	3917	4624	4767	1525	1028	1237	1168	1536	1085	1209	1180
			5099	3890	4506	4751	1520	1029	1230	1150	1551	1048	1206	1142
			4986	3875	4538	4774	1499	1012	1215	1142	1542	1043	1192	1150
			5045	3809	4574	4725	1507	1028	1181	1135	1537	1057	1186	1133
			5039	3748	4462	4724	1527	1018	1221	1116	1521	1038	1178	1167
			4985	3735	4519	4730	1503	1019	1201	1144	1520	1038	1167	1160
			5040	3668	4549	4672	1514	1003	1177	1110	1512	1031	1170	1135
			5067	3744	4409	4555	1500	988	1191	1131	1556	1007	1176	1139
			5119	3658	4381	4587	1494	979	1192	1122	1516	1006	1168	1120
			5036	3631	4393	4606	1525	966	1170	1097	1493	996	1157	1118
			5106	3563	4413	4600	1497	957	1190	1107	1497	1030	1163	1130
			5042	3557	4470	4576	1510	972	1139	1097	1494	1013	1131	1085
			5013	3540	4346	4506	1509	954	1154	1103	1515	983	1137	1079
			5110	3513	4340	4499	1524	947	1148	1089	1506	984	1126	1097
			5036	3547	4360	4488	1535	933	1153	1102	1519	972	1161	1073
			5090	3503	4335	4493	1512	945	1154	1067	1514	975	1134	1090
			5030	3506	4276	4419	1503	940	1135	1103	1510	957	1108	1075
			5032	3452	4280	4424	1495	924	1157	1092	1508	961	1100	1071
			5045	3388	4266	4391	1505	929	1139	1073	1504	938	1092	1065
			5020	3395	4249	4406	1507	918	1154	1083	1497	946	1103	1093
			5056	3402	4240	4315	1546	937	1138	1044	1482	921	1118	1072
			5044	3343	4191	4356	1507	906	1117	1095	1471	942	1098	1095
			4971	3345	4205	4364	1543	929	1128	1055	1476	917	1110	1087
			5027	3406	4267	4288	1494	926	1124	1041	1492	910	1099	1080
			4996	3306	4174	4297	1482	914	1111	1054	1481	926	1112	1040
			5024	3253	4152	4322	1476	894	1121	1043	1499	930	1120	1052
			5102	3289	4141	4316	1486	894	1109	1039	1465	898	1109	1039
			4975	3211	4153	4253	1497	905	1111	1042	1483	922	1084	1053
			5027	3180	4104	4250	1514	907	1082	1062	1492	918	1079	1059
			5137	3173	4099	4210	1493	877	1107	1062	1513	906	1072	1051
			4983	3146	4054	4177	1543	882	1094	1035	1504	906	1081	1033
			5006	3163	4148	4211	1479	883	1088	1044	1512	885	1090	1033
			5007	3083	4119	4137	1478	881	1085	1021	1481	919	1059	1011
			5042	2991	4047	4131	1516	863	1085	1032	1465	887	1056	1030
			4994	3070	4033	4135	1492	876	1084	1021	1482	875	1051	1023
			4994	3051	4034	4140	1478	869	1058	1032	1491	890	1061	1059
			4985	3005	3966	4068	1469	869	1090	1033	1488	928	1051	1005
			4993	2971	4050	4089	1499	884	1081	1011	1456	879	1077	1010
			5002	2884	4045	4117	1462	853	1066	1000	1517	870	1059	1023
			4951	2910	3924	4104	1484	864	1042	1001	1465	855	1051	1005
			5007	2809	3890	4059	1528	849	1065	989	1491	915	1032	1017
			4982	2772	3980	4042	1484	881	1055	1014	1473	859	1047	993
			4927	2745	3911	4047	1507	849	1056	1005	1469	846	1028	999
			4965	2723	3946	3920	1468	848	1055	995	1491	871	1015	1011
			4967	2705	3871	3976	1495	835	1060	1009	1461	847	1013	1018
			4922	2685	3942	3951	1488	854	1035	982	1480	826	1032	1024
			4981	2677	3867	3961	1469	853	1050	978	1497	836	1037	977
			4985	2640	3836	3967	1514	825	1030	984	1458	837	1011	1000
			4872	2620	3800	3928	1472	826	1055	974	1467	849	1004	1008
			4852	2615	3823	3895	1489	820	1045	994	1447	837	1011	996
			4974	2581	3779	3858	1444	821	1022	974	1466	847	1033	984
			4884	2534	3818	3866	1504	834	1023	970	1476	812	1025	1010
			4982	2556	3757	3880	1457	811	1031	965	1492	804	1028	996
			4995	2495	3749	3843	1473	812	1006	981	1491	795	997	981
			4958	2511	3794	3852	1470	801	1008	973	1495	795	1012	989
			4931	2517	3748	3836	1452	815	1000	983	1456	805	994	971
			4945	2463	3760	3776	1425	807	1006	973	1445	809	997	955
			4946	2474	3732	3792	1454	797	1006	951	1464	784	991	977
			4938	2461	3708	3792	1467	799	1010	956	1478	783	995	980
			4928	2477	3671	3770	1432	779	1004	978	1433	785	995	969
			4885	2436	3720	3819	1445	806	1018	943	1460	794	974	957
			4585	566	632	719	1166	367	359	401	1149	376	383	420
			4622	562	645	729	1163	375	351	406	1130	387	378	419
			4649	552	629	729	1156	383	365	413	1147	396	386	423
			4584	541	625	730	1178	372	370	423	1142	386	380	428
			4630	528	626	767	1155	371	369	418	1144	396	386	443
			4664	532	632	752	1168	361	373	422	1142	384	393	431
			4646	522	623	751	1147	365	366	419	1151	417	391	438
			4639	531	632	739	1137	364	371	426	1137	390	399	425
			4610	527	636	747	1105	371	378	423	1125	397	398	427
			4655	526	643	771	1128	358	363	424	1142	392	396	430
			4581	525	640	771	1151	361	373	419	1157	378	388	443

## Sheet: Figure5J
SiNRAT1-S68A
LPR50
																		Condition
		NORM.	Mn (uM) /Mg (mM)				Mn (uM) /Mg (mM)				Mn (uM) /Mg (mM)							Mean	SEM	N
Cycle Nr.	Time (min)		0/0	50/0	50/0.5	50/2	0/0	50/0	50/0.5	50/2	0/0	50/0	50/0.5	50/2			Time (min)	0 μM Mn2+/ 0 mM Mg2+			50 μM Mn2+/ 0 mM Mg2+			50 μM Mn2+/ 0.5 mM Mg2+			50 μM Mn2+/ 2 mM Mg2+
1	-5.79337		88.6359	100.507	89.7905	96.8188	135.811	171.229	153.273	147.874	140	156.82	156.799	162.035			-5.79337	121.482	16.4677	3	142.852	21.5772	3	133.288	21.7724	3	135.576	19.805	3
2	-5.72617		87.0038	100.323	88.3936	97.1698	134.324	163.142	149.721	142.593	140.746	153.655	159.053	161.579			-5.72617	120.691	16.9455	3	139.04	19.5513	3	132.389	22.1623	3	133.781	19.1083	3
3	-5.6595		87.5479	99.9539	88.2087	95.7437	130.575	166.796	148.329	141.564	138.102	157.649	155.973	158.922			-5.6595	118.742	15.7475	3	141.466	20.9235	3	130.837	21.428	3	132.076	18.8448	3
4	-5.59283		86.6411	98.4796	87.7979	94.6029	131.092	163.608	148.747	138.409	133.898	153.429	155.071	159.074			-5.59283	117.211	15.3062	3	138.506	20.2275	3	130.539	21.4482	3	130.695	19.0065	3
5	-5.52617		86.5807	99.6545	88.4963	95.6779	129.347	162.208	144.22	134.979	135.254	150.565	151.089	155.809			-5.52617	117.061	15.3351	3	137.476	19.2071	3	127.935	19.8189	3	128.822	17.6292	3
6	-5.4595		85.9561	98.756	87.2843	94.208	129.476	158.243	142.897	137.174	134.576	153.806	150.338	155.809			-5.4595	116.67	15.4272	3	136.935	19.1323	3	126.84	19.894	3	129.064	18.2391	3
7	-5.39283		86.7822	98.6409	87.613	95.8534	126.115	156.299	139.067	133.951	129.627	149.359	146.957	152.847			-5.39283	114.175	13.7338	3	134.766	18.1735	3	124.546	18.6063	3	127.55	16.7611	3
8	-5.32617		86.8225	97.9498	86.0929	95.4585	127.279	151.322	140.181	130.11	129.22	145.968	141.923	148.443			-5.32617	114.44	13.8204	3	131.747	16.969	3	122.732	18.3267	3	124.671	15.5353	3
9	-5.25952		84.9889	97.0283	86.627	94.5151	122.301	149.689	140.46	131.207	125.22	145.215	140.496	148.216			-5.25952	110.837	12.9514	3	130.644	16.8574	3	122.527	17.9503	3	124.646	15.8453	3
10	-5.19283		86.5001	96.7749	86.5037	94.7126	122.754	146.034	137.674	130.384	127.186	143.105	140.947	147.001			-5.19283	112.147	12.887	3	128.638	15.9539	3	121.708	17.6276	3	124.032	15.4248	3
11	-5.12617		85.1098	96.4294	86.9145	92.5186	122.754	148.134	136.421	128.532	124.542	141.899	139.144	145.938			-5.12617	110.802	12.8565	3	128.821	16.2954	3	120.826	16.974	3	122.33	15.7295	3
12	-5.0595		85.5531	98.0189	86.4626	95.3488	121.461	143.235	134.68	125.652	121.085	140.919	137.866	144.419			-5.0595	109.366	11.9071	3	127.391	14.7013	3	119.67	16.6289	3	121.807	14.2952	3
13	-4.9928		85.1501	97.5351	85.7847	92.6942	122.431	144.09	134.61	125.103	123.593	140.317	137.641	144.039			-4.9928	110.391	12.625	3	127.314	14.9292	3	119.345	16.803	3	120.612	14.9912	3
14	-4.92612		85.5531	95.9226	86.3188	92.1896	118.229	146.034	135.515	125.377	123.593	139.261	134.636	140.395			-4.92612	109.125	11.8873	3	127.073	15.6973	3	118.823	16.2542	3	119.321	14.2414	3
15	-4.85947		84.2031	96.3603	85.8258	94.0763	115.966	139.502	133.844	127.023	120.068	137.076	137.791	139.711			-4.85947	106.746	11.3333	3	124.313	13.9938	3	119.154	16.7028	3	120.27	13.5995	3
16	-4.7928		84.8277	95.531	85.6615	91.6191	116.225	140.358	131.198	123.594	119.39	136.699	136.289	135.915			-4.7928	106.814	11.0311	3	124.196	14.3714	3	117.716	16.0945	3	117.043	13.2	3
17	-4.72613		83.9613	95.9456	85.4355	91.2242	114.803	141.446	134.68	121.605	118.305	134.891	134.185	136.826			-4.72613	105.69	10.9112	3	124.094	14.2009	3	118.1	16.3329	3	116.552	13.4044	3
18	-4.65947		84.5456	95.7383	84.9425	90.4125	117.065	137.403	128.273	123.868	118.237	133.61	134.185	134.169			-4.65947	106.616	11.0404	3	122.25	13.3011	3	115.8	15.5229	3	116.15	13.2077	3
19	-4.5928		84.6665	95.6001	86.4626	91.29	113.445	134.759	128.552	123.182	115.322	131.575	133.058	133.637			-4.5928	104.478	9.92053	3	120.645	12.556	3	116.024	14.8378	3	116.037	12.736	3
20	-4.52613		83.5785	96.0839	84.5522	91.6191	113.769	133.67	127.786	123.251	119.254	132.253	131.104	132.65			-4.52613	105.534	11.0913	3	120.669	12.2994	3	114.481	14.9949	3	115.84	12.4107	3
21	-4.45947		83.78	96.3603	83.9565	91.8166	113.122	134.292	127.716	120.37	115.051	130.595	129.527	131.359			-4.45947	103.984	10.1175	3	120.416	12.0751	3	113.733	14.8975	3	114.515	11.7844	3
22	-4.39305		83.5785	96.0147	84.8398	91.8824	112.67	134.292	123.189	119.41	114.441	128.41	126.446	132.27			-4.39305	103.563	10.0053	3	119.572	11.9006	3	111.492	13.3592	3	114.521	11.9125	3
23	-4.32635		84.3844	96.0608	85.9696	90.9829	111.894	134.448	124.443	120.919	114.712	129.088	126.822	131.967			-4.32635	103.663	9.67377	3	119.866	12.0026	3	112.411	13.2388	3	114.623	12.2427	3
24	-4.25942		83.377	96.176	84.9014	92.1237	107.757	136.081	125.696	117.01	113.017	126.752	129.301	130.144			-4.25942	101.384	9.13045	3	119.67	12.0516	3	113.3	14.2372	3	113.093	11.149	3
25	-4.19275		83.8606	96.2912	83.9565	91.1365	109.114	132.97	122.772	118.381	112.271	127.204	128.4	131.435			-4.19275	101.749	8.99038	3	118.822	11.3877	3	111.709	13.9712	3	113.651	11.8712	3
26	-4.12608		82.4703	95.7844	83.7921	91.5753	108.533	130.327	125.557	116.461	111.254	126.903	127.273	128.929			-4.12608	100.752	9.17474	3	117.671	10.988	3	112.207	14.2162	3	112.322	10.98	3
27	-4.0594		83.8001	95.1163	83.7921	91.4436	109.308	129.627	124.582	116.529	112.949	123.436	123.441	128.094			-4.0594	102.019	9.16998	3	116.06	10.6231	3	110.605	13.4105	3	112.022	10.8174	3
28	-3.99273		82.8733	94.932	84.8809	90.0834	108.274	136.547	122.911	115.844	109.966	124.115	122.99	129.233			-3.99273	100.371	8.76257	3	118.531	12.3334	3	110.261	12.6899	3	111.72	11.4881	3
29	-3.92607		83.2762	94.7478	84.9014	90.1931	106.981	133.904	119.777	116.667	108.746	126.601	124.568	128.55			-3.92607	99.6678	8.21158	3	118.418	12.0212	3	109.749	12.5005	3	111.803	11.3365	3
30	-3.8594		83.0748	95.0012	84.7987	90.7416	105.753	129.86	121.588	115.021	109.695	124.642	125.62	128.094			-3.8594	99.5076	8.29484	3	116.501	10.855	3	110.669	12.9873	3	111.285	10.9433	3
31	-3.79273		83.7195	96.153	85.6204	90.5002	104.202	128.227	119.986	113.923	108.814	123.964	124.643	125.588			-3.79273	98.9116	7.71183	3	116.115	10.0564	3	110.083	12.3051	3	110.004	10.3169	3
32	-3.72607		82.3695	94.1718	83.6278	89.7323	104.396	132.426	119.429	116.118	109.017	121.326	122.99	127.942			-3.72607	98.594	8.2212	3	115.975	11.3626	3	108.682	12.5694	3	111.264	11.2941	3
33	-3.6596		82.3695	94.3101	83.9154	89.5129	105.236	134.37	119.847	114.54	109.763	124.265	122.089	124.905			-3.6596	99.1227	8.47791	3	117.648	12.0283	3	108.617	12.3677	3	109.653	10.505	3
34	-3.59293		82.3292	94.6556	84.2851	91.1584	104.654	130.171	118.733	115.021	109.559	120.648	122.089	124.45			-3.59293	98.8476	8.37967	3	115.158	10.6135	3	108.369	12.0808	3	110.21	9.9068	3
35	-3.52602		82.974	95.3237	84.2646	89.3594	104.783	129.393	117.618	113.374	108.61	120.723	121.337	123.918			-3.52602	98.7892	7.9844	3	115.147	10.2227	3	107.74	11.7867	3	108.884	10.2258	3
36	-3.45935		81.8255	94.1258	84.1208	88.9645	105.688	128.383	118.872	115.706	107.797	121.552	121.713	123.69			-3.45935	98.4368	8.32793	3	114.687	10.4679	3	108.235	12.0851	3	109.454	10.5007	3
37	-3.39268		82.168	94.3101	83.4429	89.2058	104.654	128.227	120.125	113.649	108.949	120.723	120.135	122.627			-3.39268	98.5905	8.3043	3	114.42	10.2857	3	107.901	12.2291	3	108.494	9.98628	3
38	-3.32602		82.168	94.8399	83.7305	89.2058	104.202	131.26	117.27	112.483	106.712	117.408	119.684	123.159			-3.32602	97.6939	7.79667	3	114.502	10.6134	3	106.895	11.6032	3	108.282	10.0239	3
39	-3.25958		82.0673	93.3886	84.3673	87.9114	104.525	127.683	116.295	113.443	107.525	119.141	118.557	122.475			-3.25958	98.0392	8.03279	3	113.404	10.307	3	106.407	11.039	3	107.943	10.3498	3
40	-3.19267		80.7173	94.4252	83.0937	89.4252	102.327	129.16	118.872	115.638	105.695	119.593	119.083	123.462			-3.19267	96.2464	7.82519	3	114.393	10.3588	3	107.016	11.9615	3	109.508	10.2926	3
41	-3.12627		81.5636	94.3331	81.8406	88.8548	106.658	129.238	117.131	113.649	107.051	119.141	118.633	120.121			-3.12627	98.4241	8.43104	3	114.237	10.3702	3	105.868	12.0215	3	107.542	9.52846	3
42	-3.0596		81.886	94.5635	82.6828	90.3466	104.913	127.138	116.992	112.757	104.814	118.387	117.581	122.551			-3.0596	97.2041	7.65912	3	113.363	9.73334	3	105.752	11.5357	3	108.552	9.53152	3
43	-2.99273		82.1277	93.6881	83.4224	88.1088	101.745	131.96	117.618	113.032	105.831	117.709	117.581	121.412			-2.99273	96.5679	7.31573	3	114.452	11.1674	3	106.207	11.3924	3	107.518	10.0014	3
44	-2.92607		81.0195	94.2179	81.779	90.4563	101.034	126.827	118.036	114.129	106.915	118.613	118.107	120.121			-2.92607	96.323	7.83783	3	113.22	9.79225	3	105.974	12.0975	3	108.236	9.05638	3
45	-2.8594		82.1882	94.6556	83.3402	88.5476	103.878	130.793	117.061	115.226	104.203	114.921	116.754	119.438			-2.8594	96.7567	7.28486	3	113.457	10.4577	3	105.719	11.1896	3	107.737	9.67159	3
46	-2.79272		82.3897	92.352	82.5185	88.8548	107.886	123.484	116.504	112.346	105.288	117.935	116.529	119.438			-2.79272	98.5213	8.10062	3	111.257	9.58723	3	105.184	11.3327	3	106.88	9.24201	3
47	-2.72605		81.5233	93.0661	82.765	89.5568	103.167	127.449	114.833	113.512	104.407	112.359	116.454	120.046			-2.72605	96.3658	7.4299	3	110.958	9.9503	3	104.684	10.9694	3	107.705	9.26791	3
48	-2.65938		81.8658	94.3792	82.4363	88.4818	104.137	126.516	117.34	112.071	104.339	117.408	117.431	122.323			-2.65938	96.7806	7.45762	3	112.768	9.56287	3	105.736	11.6496	3	107.626	10.019	3
49	-2.59272		80.7979	93.2043	82.6212	88.9425	102.262	124.495	119.638	113.512	105.085	112.811	117.13	119.438			-2.59272	96.0483	7.66862	3	110.17	9.12873	3	106.463	11.9429	3	107.297	9.33556	3
50	-1.53142		90.9128	104.308	96.1997	102.391	98.384	118.896	106.894	107.339	104.746	112.886	108.941	111.921			-1.53142	98.0142	3.99754	3	112.03	4.2329	3	104.011	3.95033	3	107.217	2.75163	3
51	-1.48777		91.6986	104.676	95.3985	99.649	96.3801	119.829	108.078	104.115	102.508	113.414	109.391	111.01			-1.48777	96.8624	3.12986	3	112.64	4.39127	3	104.289	4.46153	3	104.925	3.3045	3
52	-1.44427		92.021	103.916	96.0559	100.088	96.3154	117.729	109.192	105.281	99.5254	114.318	108.34	109.719			-1.44427	95.9539	2.17388	3	111.988	4.15428	3	104.529	4.24382	3	105.029	2.78317	3
53	-1.4008		92.0008	103.294	95.2958	100.395	96.8972	115.397	107.451	103.635	102.034	110.852	108.79	112.756			-1.4008	96.9773	2.89658	3	109.847	3.52955	3	103.846	4.29246	3	105.595	3.7006	3
54	-1.35703		91.5575	104.953	95.2958	99.4735	94.7641	114.697	110.933	103.361	102.237	109.872	108.264	112.301			-1.35703	96.1863	3.16393	3	109.84	2.81287	3	104.831	4.8295	3	105.045	3.79745	3
55	-1.31355		91.0336	103.225	95.152	101.097	96.1215	114.93	103.203	104.458	101.627	110.475	110.368	111.921			-1.31355	96.2608	3.05886	3	109.543	3.41086	3	102.908	4.39499	3	105.825	3.19852	3
56	-1.27007		91.0336	103.525	96.9187	99.6709	97.2851	115.397	104.666	102.195	101.288	112.811	109.917	110.099			-1.27007	96.5356	2.98383	3	110.577	3.60455	3	103.834	3.77539	3	103.988	3.14095	3
57	-1.2263		90.671	103.455	96.097	100.856	95.0873	115.708	107.033	104.595	97.6271	108.063	109.091	110.554			-1.2263	94.4618	2.03228	3	109.075	3.57293	3	104.074	4.03238	3	105.335	2.8241	3
58	-1.18282		91.0739	105.275	95.0288	100.505	95.0226	115.008	103.552	103.704	100.475	110.625	105.71	110.099			-1.18282	95.5237	2.72528	3	110.303	2.81416	3	101.43	3.26075	3	104.769	2.82033	3
59	-1.13907		90.3889	102.096	94.4947	101.053	92.5663	114.075	100.627	101.92	97.8305	107.385	106.912	107.365			-1.13907	93.5952	2.20896	3	107.852	3.46574	3	100.678	3.5847	3	103.446	1.97541	3
60	-1.09558		90.671	102.995	95.1109	99.4515	93.4712	112.986	104.735	100.823	98.2373	106.933	105.259	107.441			-1.09558	94.1265	2.20864	3	107.638	2.9057	3	101.702	3.29892	3	102.572	2.46663	3
61	-1.0521		91.0336	102.81	94.3714	98.0254	92.9541	112.83	105.223	101.989	98.4407	107.234	105.56	106.606			-1.0521	94.1428	2.21929	3	107.625	2.89914	3	101.718	3.67457	3	102.207	2.47935	3
62	-1.0086		89.9254	103.179	94.433	97.828	93.2773	111.275	104.735	103.909	95.2542	106.782	104.207	103.797			-1.0086	92.819	1.55526	3	107.079	2.3419	3	101.125	3.34959	3	101.845	2.0086	3
63	-0.965117		89.8449	102.787	92.728	98.6178	92.2431	111.198	103.343	101.029	97.8305	105.35	105.71	106.53			-0.965117	93.3061	2.36575	3	106.445	2.48872	3	100.594	3.9917	3	102.059	2.3414	3
64	-0.921367		90.812	104.792	93.1183	99.0566	91.2088	112.986	103.482	100.48	98.4407	105.049	106.161	106.606			-0.921367	93.4872	2.47941	3	107.609	2.68961	3	100.92	3.97692	3	102.048	2.31593	3
65	-0.877883		90.6307	101.958	93.673	99.276	91.1441	112.053	99.5125	99.1084	98.9153	104.371	106.536	104.935			-0.877883	93.5634	2.68005	3	106.127	3.04358	3	99.9073	3.71859	3	101.107	1.91505	3
66	-0.834133		89.7038	102.926	92.7691	98.7714	90.9502	117.574	102.716	100.206	95.5254	104.295	105.56	105.391			-0.834133	92.0598	1.76976	3	108.265	4.67123	3	100.348	3.87747	3	101.456	2.01057	3
67	-0.790633		89.4822	101.589	94.9055	97.9596	91.7906	110.031	99.5125	99.7942	95.322	105.576	103.757	105.923			-0.790633	92.1983	1.6981	3	105.732	2.43813	3	99.3915	2.55581	3	101.225	2.40753	3
68	-0.7469		90.3284	103.455	93.0772	98.4862	90.9502	110.342	101.671	99.9314	94.8475	105.953	101.953	107.213			-0.7469	92.042	1.41415	3	106.584	2.01284	3	98.9006	2.91284	3	101.877	2.70062	3
69	-0.7034		90.3687	102.396	93.2827	98.2448	91.0795	111.975	100.905	99.2455	95.2542	104.295	103.08	105.391			-0.7034	92.2342	1.52392	3	106.222	2.9283	3	99.0895	2.97052	3	100.96	2.23403	3
70	0		100	100	100	100	100	100	100	100	100	100	100	100			0	100	0	3	100	0	3	100	0	3	100	0	3
71	0.0436167		98.7911	97.8346	102.177	99.0127	98.7718	101.322	96.1699	96.1591	99.4576	96.2321	96.9947	97.4184			0.0436167	99.0068	0.225467	3	98.4629	1.5025	3	98.4474	1.88019	3	97.5301	0.825654	3
72	0.0871		100.665	97.5582	99.6919	98.2668	98.0608	93.9347	95.4039	96.9136	98.5085	95.7046	94.5905	99.2407			0.0871	99.078	0.803886	3	95.7325	1.0461	3	96.5621	1.5824	3	98.1404	0.674749	3
73	0.130583		99.7381	95.1163	97.9458	98.0913	96.1215	93.2348	92.4791	94.3759	96.4068	92.6903	94.5905	96.5072			0.130583	97.4221	1.16089	3	93.6805	0.734933	3	95.0051	1.59165	3	96.3248	1.07642	3
74	0.174333		98.3679	95.4849	96.2408	95.7437	94.8933	94.3235	93.0362	94.9931	97.2881	91.5599	92.8625	95.0645			0.174333	96.8498	1.02669	3	93.7894	1.16409	3	94.0465	1.09828	3	95.2671	0.239193	3
75	0.217817		98.3881	92.5593	95.1315	96.4897	94.1176	91.4463	91.0167	93.4842	98.3051	92.0121	93.0128	97.798			0.217817	96.9369	1.40985	3	92.0059	0.321301	3	93.0537	1.188	3	95.924	1.27701	3
76	0.261567		98.5291	93.2965	93.7757	95.656	96.6387	89.0358	91.4345	94.5816	94.3051	89.9774	92.562	96.1276			0.261567	96.491	1.22161	3	90.7699	1.29221	3	92.5907	0.675982	3	95.4551	0.457443	3
77	0.305067		99.194	91.8222	94.4125	94.9978	95.2812	91.5241	89.5543	94.7188	99.0508	86.9631	90.1578	94.4571			0.305067	97.842	1.28109	3	90.1031	1.57238	3	91.3749	1.52877	3	94.7246	0.156116	3
78	0.3488		98.7508	90.5782	93.9811	94.4493	97.0265	87.4806	91.3649	93.7586	97.1525	86.4356	89.8573	93.6219			0.3488	97.6433	0.554941	3	88.1648	1.24385	3	91.7344	1.2047	3	93.9433	0.256092	3
79	0.3923		98.4485	89.6798	92.009	94.3616	94.3762	87.1695	89.5543	93.7586	97.4915	86.4356	89.4816	93.7737			0.3923	96.7721	1.22938	3	87.7616	0.982209	3	90.3483	0.830627	3	93.9646	0.198518	3
80	0.43605		98.1664	90.0023	91.2284	93.5279	91.7906	88.647	87.5348	94.513	94.3729	84.7777	89.0308	91.6477			0.43605	94.7766	1.85159	3	87.809	1.56533	3	89.2647	1.07265	3	93.2295	0.840498	3
81	0.479817		98.0052	88.5741	90.7149	94.2738	91.1441	90.1244	87.7437	91.358	95.1186	82.8184	88.5049	92.1033			0.479817	94.756	1.98891	3	87.1723	2.22248	3	88.9878	0.891038	3	92.5784	0.874592	3
82	0.523283		98.7306	87.0997	90.2835	93.0452	91.4674	86.5474	87.5348	91.0151	95.661	81.7634	88.2044	93.47			0.523283	95.2863	2.10507	3	85.1369	1.69426	3	88.6742	0.827518	3	92.5101	0.757497	3
83	0.566783		99.5164	85.8788	91.0641	94.2957	92.5016	86.3142	86.1421	89.7805	96.6102	80.3316	85.4245	92.7866			0.566783	96.2094	2.03489	3	84.1749	1.92574	3	87.5435	1.77242	3	92.2876	1.3271	3
84	0.610533		99.3955	87.9751	92.0501	94.6687	93.2127	85.2255	85.3064	89.0261	94.1695	79.578	83.9219	89.4457			0.610533	95.5926	1.92144	3	84.2595	2.47169	3	87.0928	2.51068	3	91.0468	1.81499	3
85	0.654017		97.3806	85.3029	90.0781	91.0268	91.0149	86.703	85.5153	88.7517	97.7627	79.6534	85.8753	88.9901			0.654017	95.3861	2.18838	3	83.8864	2.15477	3	87.1562	1.46461	3	89.5895	0.721905	3
86	0.697767		100.141	86.0631	89.811	92.8916	90.7563	82.3484	83.3565	88.546	95.5254	76.8651	85.725	89.0661			0.697767	95.4742	2.70925	3	81.7589	2.67155	3	86.2975	1.8851	3	90.1679	1.37012	3
87	0.741517		96.9172	85.1417	90.7765	92.4748	90.7563	82.4261	84.0529	86.9684	94.7119	77.9201	83.5462	87.3956			0.741517	94.1285	1.80226	3	81.8293	2.10593	3	86.1252	2.33024	3	88.9463	1.76855	3
88	0.785		100.383	82.7229	87.7157	91.5533	89.6574	81.804	83.2173	87.037	96	76.639	82.7198	88.9142			0.785	95.3467	3.11334	3	80.3886	1.89348	3	84.5509	1.5889	3	89.1682	1.30991	3
89	0.8285		100.846	83.0684	88.8661	90.9171	90.1099	80.0156	82.6602	85.5967	94.8475	77.468	84.0721	89.4457			0.8285	95.2679	3.10646	3	80.184	1.6189	3	85.1995	1.87807	3	88.6532	1.58615	3
90	0.87225		98.1261	82.6538	86.3804	89.7104	89.5281	80.3266	81.7549	86.0768	93.7627	74.3029	81.6679	88.2308			0.87225	93.8057	2.48212	3	79.0944	2.48816	3	83.2677	1.55655	3	88.006	1.05493	3
91	0.915733		98.1463	80.8339	88.1676	91.5972	90.2392	80.9487	81.4763	88.0658	92.678	76.0362	83.3208	89.2179			0.915733	93.6878	2.33776	3	79.2729	1.61871	3	84.3216	1.99538	3	89.627	1.03973	3
92	0.959483		96.9575	80.5114	87.7979	89.4691	88.9463	80.4821	82.1727	85.9396	93.5593	74.3029	81.7431	86.8641			0.959483	93.1544	2.32146	3	78.4322	2.06462	3	83.9045	1.95061	3	87.4243	1.05666	3
93	1.00323		98.5896	81.1564	86.2366	88.6354	90.0452	79.0824	80.9889	86.5569	94.1695	75.2072	80.3907	86.94			1.00323	94.2681	2.46702	3	78.482	1.74342	3	82.5387	1.85701	3	87.3774	0.638613	3
94	1.04672		98.5493	79.1983	84.6138	88.3063	89.5281	76.6719	80.7103	86.1454	92.7458	74.3783	79.7145	87.0919			1.04672	93.6077	2.6396	3	76.7495	1.39197	3	81.6795	1.49503	3	87.1812	0.625386	3
95	1.09022		97.6627	77.7701	82.5801	89.2716	89.2696	75.972	80.2228	84.9108	91.2542	72.9465	81.8182	86.7882			1.09022	92.7288	2.53259	3	75.5629	1.4074	3	81.5404	0.694519	3	86.9902	1.26289	3
96	1.13397		96.9373	76.9408	84.696	87.8455	90.1099	77.8383	79.1783	84.8422	92.5424	72.4943	76.6341	87.0919			1.13397	93.1965	1.99787	3	75.7578	1.65217	3	80.1694	2.37944	3	86.5932	0.902117	3
97	1.17768		97.4814	76.7104	82.9088	87.2312	90.627	77.2162	79.3175	85.1852	93.4237	72.0422	78.8881	87.5475			1.17768	93.844	1.98981	3	75.3229	1.64685	3	80.3715	1.27471	3	86.6546	0.740369	3
98	1.22118		96.4739	76.4801	82.3747	86.7925	88.2999	75.2722	78.0641	84.6365	91.661	72.1176	80.015	86.4085			1.22118	92.145	2.372	3	74.6233	1.30047	3	80.1513	1.24623	3	85.9458	0.663978	3
99	1.26492		97.3605	76.5492	80.9573	86.8144	87.9121	76.4386	78.9694	83.9506	93.3559	71.364	79.414	84.814			1.26492	92.8762	2.73804	3	74.7839	1.71026	3	79.7802	0.602368	3	85.193	0.848143	3
100	1.30867		96.2926	74.8906	81.4092	84.4449	88.3646	75.3499	78.8301	82.5789	92	71.5901	78.4373	84.4343			1.30867	92.219	2.29123	3	73.9435	1.18418	3	79.5589	0.932098	3	83.8194	0.620256	3
101	1.35217		95.6075	74.4759	80.5259	86.1562	87.4596	76.2053	77.9248	85.6653	92.6102	70.6104	76.4087	84.2825			1.35217	91.8924	2.37932	3	73.7639	1.65388	3	78.2865	1.2022	3	85.368	0.56096	3
102	1.39592		96.6552	74.9827	82.3952	85.1909	88.2999	77.7605	79.3175	82.9904	92.8136	71.2886	77.2352	83.2194			1.39592	92.5896	2.41457	3	74.6773	1.8745	3	79.6493	1.49879	3	83.8002	0.698453	3
103	1.4394		96.2523	73.9922	80.9367	85.3444	89.4635	74.2613	77.507	82.5103	92.0678	70.8365	77.2352	82.8398			1.4394	92.5945	1.97737	3	73.03	1.0995	3	78.5596	1.19114	3	83.5648	0.894873	3
104	1.48315		97.5015	73.7157	79.9096	85.8271	89.011	74.4946	75.9053	84.7051	93.3559	70.9118	75.3569	84.6621			1.48315	93.2895	2.45123	3	73.0407	1.08792	3	77.0573	1.43494	3	85.0648	0.381377	3
105	1.5269		96.2321	72.7482	77.5062	83.9403	87.1364	73.3281	78.2033	82.5789	91.7966	69.5554	75.6574	84.8899			1.5269	91.7217	2.62598	3	71.8773	1.17294	3	77.1223	0.759597	3	83.803	0.670656	3
106	1.5704		96.4739	72.9555	76.931	84.072	88.0414	74.4946	75.8357	82.8532	92.7458	69.8568	75.5823	82.8398			1.5704	92.4203	2.4397	3	72.4356	1.3638	3	76.1163	0.413855	3	83.255	0.408503	3
107	1.61388		95.95	70.6289	78.3484	83.8087	91.0795	73.0171	72.7716	81.4815	91.8644	67.1439	75.5823	84.814			1.61388	92.9647	1.50979	3	70.2633	1.70527	3	75.5674	1.6099	3	83.368	0.986914	3
108	1.65762		95.8896	70.2373	77.0131	84.6424	89.011	72.4728	78.4819	80.3841	91.1186	67.1439	75.8828	81.7008			1.65762	92.0064	2.03469	3	69.9513	1.54494	3	77.1259	0.752412	3	82.2424	1.25874	3
109	1.70112		94.9023	70.4676	78.1224	85.147	89.8513	73.9502	75.3482	80.727	92.0678	67.5207	74.831	83.9028			1.70112	92.2738	1.46172	3	70.6462	1.85819	3	76.1005	1.02192	3	83.2589	1.31592	3
110	1.74487		96.5344	69.5923	77.0131	83.8087	85.5204	72.3173	76.4624	81.3443	91.0508	67.5961	76.1082	82.0805			1.74487	91.0352	3.17947	3	69.8352	1.36829	3	76.5279	0.263285	3	82.4112	0.730365	3
111	1.78835		95.1239	68.2101	75.9655	82.6678	88.5585	71.8507	76.532	79.2867	90.7119	67.0686	74.831	82.2323			1.78835	91.4648	1.9323	3	69.0431	1.44195	3	75.7762	0.500101	3	81.3956	1.06194	3
112	1.8321		95.1642	68.6478	76.3558	83.4138	89.0756	72.1617	74.1643	79.8354	90.9831	66.6918	74.0045	82.7639			1.8321	91.741	1.79801	3	69.1671	1.60025	3	74.8415	0.758525	3	82.0043	1.10059	3
113	1.87587		94.8821	68.0028	76.1504	82.8434	87.7828	72.0062	73.6769	79.3553	91.8644	67.2193	74.2299	82.0046			1.87587	91.5098	2.05705	3	69.0761	1.48242	3	74.6857	0.749525	3	81.4011	1.05116	3
114	1.91935		95.6075	68.0488	74.8562	82.6898	87.395	70.5288	74.8607	80.2469	91.1186	65.5614	73.5537	80.9415			1.91935	91.3737	2.37418	3	68.0463	1.43395	3	74.4235	0.434915	3	81.2927	0.726731	3
115	1.96283		95.2851	66.252	75.0205	82.7337	87.5889	70.0622	72.5627	80.727	89.9661	64.5818	73.4786	81.7008			1.96283	90.9467	2.27517	3	66.9653	1.62177	3	73.6873	0.717157	3	81.7205	0.579351	3
116	2.00658		94.5799	66.874	75.7395	81.9	89.6574	70.6843	74.0251	79.4239	92.678	64.0543	72.4267	80.7137			2.00658	92.3051	1.43318	3	67.2042	1.92103	3	74.0638	0.95651	3	80.6792	0.714994	3
117	2.05007		93.9553	65.3075	73.5004	81.6367	87.7828	70.9953	75	79.8354	93.3559	63.8282	70.6987	81.3212			2.05007	91.698	1.96523	3	66.7103	2.18464	3	73.0664	1.26049	3	80.9311	0.555366	3
118	2.09382		94.5799	65.5609	73.8907	81.3515	88.0414	69.1291	73.8858	79.2181	91.1864	63.8282	72.2765	80.1822			2.09382	91.2692	1.88796	3	66.1727	1.56051	3	73.351	0.537259	3	80.2506	0.616796	3
119	2.13732		95.1844	64.34	73.1512	80.8469	87.3303	68.507	73.3287	78.9438	92.4068	63.3007	71.9008	80.41			2.13732	91.6405	2.29941	3	65.3826	1.59077	3	72.7936	0.449301	3	80.0669	0.575545	3
120	2.18105		93.653	63.2343	72.8431	79.706	87.0071	68.818	71.5181	77.8464	89.7627	64.5818	71.3749	79.1192			2.18105	90.141	1.92781	3	65.5447	1.68226	3	71.912	0.467348	3	78.8905	0.548877	3
121	2.22455		94.5799	64.2939	73.2744	80.2106	86.2314	68.2737	70.8914	77.7092	90.6441	64.431	71.6754	80.3341			2.22455	90.4851	2.41131	3	65.6662	1.30434	3	71.9471	0.701219	3	79.418	0.855131	3
122	2.27402		94.8015	63.05	71.9187	80.0351	87.2657	68.3515	74.0947	77.8464	90.0339	64.5064	69.7971	78.7396			2.27402	90.7004	2.20079	3	65.3026	1.58134	3	71.9368	1.24063	3	78.8737	0.635383	3
123	2.34068		95.0836	62.0134	73.4182	80.3203	87.0718	69.5179	75.9053	77.5034	89.6271	63.15	70.6236	79.5748			2.34068	90.5942	2.36283	3	64.8937	2.33524	3	73.3157	1.52556	3	79.1328	0.842655	3
124	2.40737		94.862	63.2573	74.0756	79.1795	86.4253	68.6625	70.8217	77.7778	89.2881	62.4717	71.0744	79.0433			2.40737	90.1918	2.47701	3	64.7972	1.94592	3	71.9906	1.04506	3	78.6668	0.446265	3
125	2.47403		97.1993	62.7736	72.6376	78.8723	86.1021	67.4961	70.8217	76.5432	90.7797	62.095	70.9241	78.7396			2.47403	91.3604	3.2166	3	64.1215	1.69862	3	71.4612	0.588977	3	78.0517	0.755215	3
126	2.54095		93.6933	60.9998	71.6105	79.1356	87.0718	68.818	71.6574	77.2291	92.2712	62.6978	68.7453	78.1321			2.54095	91.0121	2.01249	3	64.1719	2.37424	3	70.6711	0.962978	3	78.1656	0.550617	3
127	2.60753		95.5873	60.7003	72.1035	77.4024	85.0032	68.2737	68.3148	78.1893	90.3051	62.6225	70.6987	78.5118			2.60753	90.2986	3.05537	3	63.8655	2.27289	3	70.3723	1.10583	3	78.0345	0.329479	3
128	2.6742		94.3784	60.2396	70.4807	78.8943	87.4596	65.6299	70.8914	77.0233	91.1186	62.4717	70.9241	77.2969			2.6742	90.9855	1.99839	3	62.7804	1.56367	3	70.7654	0.142664	3	77.7382	0.583418	3
129	2.74087		95.1038	59.1108	70.3574	77.1391	85.8436	67.4961	71.3092	77.2291	88.0678	62.5471	69.6469	77.6006			2.74087	89.6717	2.79089	3	63.0513	2.43372	3	70.4378	0.481548	3	77.3229	0.141249	3
130	2.80753		95.1239	58.8113	69.8644	78.0606	85.5204	66.7963	68.3844	76.749	89.9661	61.5674	70.3231	78.4358			2.80753	90.2035	2.77485	3	62.3917	2.3416	3	69.524	0.584963	3	77.7485	0.51135	3
131	2.8742		94.9023	58.3276	71.6311	77.5998	86.6839	66.6407	69.7075	75.0343	88.6102	60.3617	69.121	75.019			2.8742	90.0654	2.48152	3	61.7767	2.50192	3	70.1532	0.758092	3	75.8844	0.85774	3
132	2.94087		95.4463	57.1758	69.8644	76.5248	87.7182	66.4852	68.454	77.2977	88.8136	60.8892	70.6236	77.8284			2.94087	90.6593	2.41428	3	61.5167	2.70566	3	69.6474	0.63563	3	77.217	0.378478	3
133	3.00753		95.6075	57.1988	68.9811	76.7442	85.5204	66.6407	68.663	75.0343	89.2881	61.1907	67.4681	78.6636			3.00753	90.1387	2.9428	3	61.6767	2.73647	3	68.3707	0.460568	3	76.814	1.04828	3
134	3.0742		94.9426	56.1622	69.5152	77.3585	86.8132	66.4075	68.454	76.1317	87.7966	60.7385	69.121	76.6135			3.0742	89.8508	2.56167	3	61.1027	2.96316	3	69.0301	0.309683	3	76.7012	0.356852	3
135	3.14087		95.6478	56.9224	69.3509	76.1299	87.0718	65.2411	68.1755	75.1715	89.0169	61.266	68.6702	75.6264			3.14087	90.5788	2.59594	3	61.1431	2.40218	3	68.7322	0.340713	3	75.6426	0.276787	3
136	3.20753		94.3583	57.1297	68.5086	75.7569	86.49	66.0187	68.2451	75.1029	88.4068	60.7385	66.7168	75.3227			3.20753	89.7517	2.36882	3	61.2956	2.5811	3	67.8235	0.55858	3	75.3942	0.192154	3
137	3.2742		95.1844	56.2543	68.221	75.6033	85.7143	64.3857	68.1058	76.1317	90.5085	61.7182	68.0691	77.6765			3.2742	90.469	2.73384	3	60.7861	2.39314	3	68.132	0.0457636	3	76.4705	0.622001	3
138	3.34087		93.3709	56.2082	68.0156	76.3712	85.8436	64.1524	69.0808	74.417	90.5085	59.6835	67.6183	75.3227			3.34087	89.9077	2.19363	3	60.0147	2.29925	3	68.2382	0.436602	3	75.3703	0.564634	3
139	3.40753		93.2501	55.0334	67.1528	76.3712	86.9425	64.3857	66.922	74.7599	87.9322	58.6285	70.4733	76.6135			3.40753	89.3749	1.95852	3	59.3492	2.72372	3	68.1827	1.14724	3	75.9149	0.581694	3
140	3.4742		94.4791	54.9643	66.516	74.5283	87.6535	63.2193	68.3844	74.6914	90.1017	59.9849	68.7453	77.0691			3.4742	90.7448	1.99645	3	59.3895	2.40154	3	67.8819	0.690844	3	75.4296	0.821107	3
141	3.54087		93.8344	53.8125	66.5571	74.8574	85.3911	64.7745	67.8273	73.3882	89.9661	58.4024	67.7686	76.0061			3.54087	89.7305	2.44021	3	58.9965	3.17837	3	67.3843	0.41396	3	74.7506	0.7576	3
142	3.60752		93.512	53.6512	67.728	74.9671	86.2961	64.8523	67.688	74.6914	89.8983	57.6488	66.6416	74.3356			3.60752	89.9021	2.08306	3	58.7174	3.27731	3	67.3526	0.355654	3	74.6647	0.18278	3
143	3.6742		94.6202	52.3842	65.9408	74.7038	86.1021	65.0855	66.5738	75.0343	89.9661	59.0053	65.9654	75.3986			3.6742	90.2295	2.46248	3	58.825	3.66766	3	66.16	0.207015	3	75.0456	0.200654	3
144	3.74087		96.7963	52.7067	66.3106	74.6161	87.6535	63.7636	66.4345	74.0741	88.4068	59.7589	66.6416	73.956			3.74087	90.9522	2.93013	3	58.7431	3.232	3	66.4623	0.0965567	3	74.2154	0.203229	3
145	3.80752		93.9754	52.3382	64.6672	72.9706	85.1972	63.9969	67.8969	73.594	89.6271	58.0256	66.6416	73.88			3.80752	89.5999	2.5341	3	58.1202	3.36591	3	66.4019	0.940014	3	73.4815	0.268481	3
146	3.87418		93.1896	51.8544	65.3246	73.4971	84.5507	63.9191	67.2006	76.1317	86.4407	57.6488	65.5147	72.9689			3.87418	88.0603	2.62202	3	57.8075	3.48369	3	66.0133	0.596181	3	74.1992	0.978187	3
147	3.94085		93.8545	51.8314	66.3928	73.8043	85.3264	62.4417	67.4095	74.7599	89.8305	58.4778	66.9421	75.3227			3.94085	89.6705	2.46314	3	57.5836	3.09539	3	66.9148	0.293814	3	74.629	0.443189	3
148	4.00752		94.3985	50.7256	64.9548	73.7385	85.1325	63.3748	66.8524	73.8683	88.339	58.7038	67.1675	73.8041			4.00752	89.29	2.71681	3	57.6014	3.69287	3	66.3249	0.691064	3	73.8036	0.0374794	3
149	4.07418		93.2702	51.3707	63.9277	72.9925	84.2922	60.3421	65.7382	73.5254	88.0678	56.9706	64.9136	74.1838			4.07418	88.5434	2.60262	3	56.2278	2.61634	3	64.8598	0.523329	3	73.5672	0.344509	3
150	5.47742		88.9381	12.5547	12.4692	13.9754	72.075	30.0156	27.3677	32.3731	81.9661	27.2796	29.0759	44.4951			5.47742	80.9931	4.89223	3	23.2833	5.42212	3	22.9709	5.27397	3	30.2812	8.87213	3
151	5.52102		89.321	12.8542	12.4692	13.9096	71.4932	29.9378	28.4819	33.4705	82.2373	27.7317	29.3764	42.2172			5.52102	81.0172	5.18247	3	23.5079	5.36479	3	23.4425	5.49273	3	29.8658	8.36809	3
152	5.5645		89.4016	12.739	12.0789	13.7122	69.8772	30.0933	28.8997	33.6763	82.2373	28.1085	29.0008	38.9522			5.5645	80.5053	5.70234	3	23.6469	5.48398	3	23.3265	5.62386	3	28.7802	7.68642	3
153	5.608		89.0187	12.4165	12.1611	13.6463	70.3297	29.3935	27.5766	33.7449	81.5593	28.2592	29.151	38.041			5.608	80.3026	5.43154	3	23.3564	5.47974	3	22.9629	5.42001	3	28.4774	7.51852	3
154	5.65173		89.2202	12.4626	12.1405	13.4489	70.3943	30.5599	27.6462	33.8134	80	27.8071	28.8505	35.4594			5.65173	79.8715	5.43495	3	23.6098	5.63	3	22.8791	5.38053	3	27.5739	7.07847	3
155	5.6955		89.4822	12.1631	12.0173	13.9315	70.8468	30.7154	27.4373	34.5679	82.1695	27.0535	29.0008	35.9909			5.6955	80.8328	5.42092	3	23.3107	5.67314	3	22.8184	5.41942	3	28.1634	7.1278	3
156	5.73898		88.4949	12.3474	11.8735	13.6683	70.6529	29.9378	27.5766	34.3621	80.1356	27.6564	28.4748	34.7001			5.73898	79.7611	5.15394	3	23.3138	5.52264	3	22.6416	5.39033	3	27.5768	6.95496	3
157	5.78273		87.9911	12.3243	11.9762	13.2953	69.1661	29.6267	30.5014	34.0192	80.678	26.9781	28.55	32.4981			5.78273	79.2784	5.47918	3	22.9764	5.38063	3	23.6758	5.8769	3	26.6042	6.66892	3
158	5.82648		89.3411	12.094	12.5514	13.7122	67.744	30.6376	29.2479	34.7737	79.3898	27.3549	28.7754	31.2832			5.82648	78.825	6.24094	3	23.3622	5.71324	3	23.5249	5.48845	3	26.5897	6.51713	3
159	5.86997		88.9986	12.1401	12.6335	13.4269	67.744	29.7823	27.0891	35.1166	78.7797	27.4303	28.2494	31.511			5.86997	78.5074	6.13718	3	23.1175	5.53057	3	22.6574	5.0231	3	26.6849	6.71017	3
160	5.91372		88.3135	12.2783	12.4486	13.6244	70.0065	30.1711	26.7409	34.4993	79.5932	27.8071	28.3997	31.5869			5.91372	79.3044	5.28677	3	23.4188	5.61191	3	22.5298	5.06325	3	26.5702	6.52728	3
		RAW	Mn (uM) /Mg (mM)				Mn (uM) /Mg (mM)				Mn (uM) /Mg (mM)
			0/0	50/0	50/0.5	50/2	0/0	50/0	50/0.5	50/2	0/0	50/0	50/0.5	50/2
			4399	4363	4371	4413	2101	2202	2201	2156	2065	2081	2087	2134
			4318	4355	4303	4429	2078	2098	2150	2079	2076	2039	2117	2128
			4345	4339	4294	4364	2020	2145	2130	2064	2037	2092	2076	2093
			4300	4275	4274	4312	2028	2104	2136	2018	1975	2036	2064	2095
			4297	4326	4308	4361	2001	2086	2071	1968	1995	1998	2011	2052
			4266	4287	4249	4294	2003	2035	2052	2000	1985	2041	2001	2052
			4307	4282	4265	4369	1951	2010	1997	1953	1912	1982	1956	2013
			4309	4252	4191	4351	1969	1946	2013	1897	1906	1937	1889	1955
			4218	4212	4217	4308	1892	1925	2017	1913	1847	1927	1870	1952
			4293	4201	4211	4317	1899	1878	1977	1901	1876	1899	1876	1936
			4224	4186	4231	4217	1899	1905	1959	1874	1837	1883	1852	1922
			4246	4255	4209	4346	1879	1842	1934	1832	1786	1870	1835	1902
			4226	4234	4176	4225	1894	1853	1933	1824	1823	1862	1832	1897
			4246	4164	4202	4202	1829	1878	1946	1828	1823	1848	1792	1849
			4179	4183	4178	4288	1794	1794	1922	1852	1771	1819	1834	1840
			4210	4147	4170	4176	1798	1805	1884	1802	1761	1814	1814	1790
			4167	4165	4159	4158	1776	1819	1934	1773	1745	1790	1786	1802
			4196	4156	4135	4121	1811	1767	1842	1806	1744	1773	1786	1767
			4202	4150	4209	4161	1755	1733	1846	1796	1701	1746	1771	1760
			4148	4171	4116	4176	1760	1719	1835	1797	1759	1755	1745	1747
			4158	4183	4087	4185	1750	1727	1834	1755	1697	1733	1724	1730
			4148	4168	4130	4188	1743	1727	1769	1741	1688	1704	1683	1742
			4188	4170	4185	4147	1731	1729	1787	1763	1692	1713	1688	1738
			4138	4175	4133	4199	1667	1750	1805	1706	1667	1682	1721	1714
			4162	4180	4087	4154	1688	1710	1763	1726	1656	1688	1709	1731
			4093	4158	4079	4174	1679	1676	1803	1698	1641	1684	1694	1698
			4159	4129	4079	4168	1691	1667	1789	1699	1666	1638	1643	1687
			4113	4121	4132	4106	1675	1756	1765	1689	1622	1647	1637	1702
			4133	4113	4133	4111	1655	1722	1720	1701	1604	1680	1658	1693
			4123	4124	4128	4136	1636	1670	1746	1677	1618	1654	1672	1687
			4155	4174	4168	4125	1612	1649	1723	1661	1605	1645	1659	1654
			4088	4088	4071	4090	1615	1703	1715	1693	1608	1610	1637	1685
			4088	4094	4085	4080	1628	1728	1721	1670	1619	1649	1625	1645
			4086	4109	4103	4155	1619	1674	1705	1677	1616	1601	1625	1639
			4118	4138	4102	4073	1621	1664	1689	1653	1602	1602	1615	1632
			4061	4086	4095	4055	1635	1651	1707	1687	1590	1613	1620	1629
			4078	4094	4062	4066	1619	1649	1725	1657	1607	1602	1599	1615
			4078	4117	4076	4066	1612	1688	1684	1640	1574	1558	1593	1622
			4073	4054	4107	4007	1617	1642	1670	1654	1586	1581	1578	1613
			4006	4099	4045	4076	1583	1661	1707	1686	1559	1587	1585	1626
			4048	4095	3984	4050	1650	1662	1682	1657	1579	1581	1579	1582
			4064	4105	4025	4118	1623	1635	1680	1644	1546	1571	1565	1614
			4076	4067	4061	4016	1574	1697	1689	1648	1561	1562	1565	1599
			4021	4090	3981	4123	1563	1631	1695	1664	1577	1574	1572	1582
			4079	4109	4057	4036	1607	1682	1681	1680	1537	1525	1554	1573
			4089	4009	4017	4050	1669	1588	1673	1638	1553	1565	1551	1573
			4046	4040	4029	4082	1596	1639	1649	1655	1540	1491	1550	1581
			4063	4097	4013	4033	1611	1627	1685	1634	1539	1558	1563	1611
			4010	4046	4022	4054	1582	1601	1718	1655	1550	1497	1559	1573
			4512	4528	4683	4667	1522	1529	1535	1565	1545	1498	1450	1474
			4551	4544	4644	4542	1491	1541	1552	1518	1512	1505	1456	1462
			4567	4511	4676	4562	1490	1514	1568	1535	1468	1517	1442	1445
			4566	4484	4639	4576	1499	1484	1543	1511	1505	1471	1448	1485
			4544	4556	4639	4534	1466	1475	1593	1507	1508	1458	1441	1479
			4518	4481	4632	4608	1487	1478	1482	1523	1499	1466	1469	1474
			4518	4494	4718	4543	1505	1484	1503	1490	1494	1497	1463	1450
			4500	4491	4678	4597	1471	1488	1537	1525	1440	1434	1452	1456
			4520	4570	4626	4581	1470	1479	1487	1512	1482	1468	1407	1450
			4486	4432	4600	4606	1432	1467	1445	1486	1443	1425	1423	1414
			4500	4471	4630	4533	1446	1453	1504	1470	1449	1419	1401	1415
			4518	4463	4594	4468	1438	1451	1511	1487	1452	1423	1405	1404
			4463	4479	4597	4459	1443	1431	1504	1515	1405	1417	1387	1367
			4459	4462	4514	4495	1427	1430	1484	1473	1443	1398	1407	1403
			4507	4549	4533	4515	1411	1453	1486	1465	1452	1394	1413	1404
			4498	4426	4560	4525	1410	1441	1429	1445	1459	1385	1418	1382
			4452	4468	4516	4502	1407	1512	1475	1461	1409	1384	1405	1388
			4441	4410	4620	4465	1420	1415	1429	1455	1406	1401	1381	1395
			4483	4491	4531	4489	1407	1419	1460	1457	1399	1406	1357	1412
			4485	4445	4541	4478	1409	1440	1449	1447	1405	1384	1372	1388
			4963	4341	4868	4558	1547	1286	1436	1458	1475	1327	1331	1317
			4903	4247	4974	4513	1528	1303	1381	1402	1467	1277	1291	1283
			4996	4235	4853	4479	1517	1208	1370	1413	1453	1270	1259	1307
			4950	4129	4768	4471	1487	1199	1328	1376	1422	1230	1259	1271
			4882	4145	4685	4364	1468	1213	1336	1385	1435	1215	1236	1252
			4883	4018	4631	4398	1456	1176	1307	1363	1450	1221	1238	1288
			4890	4050	4565	4360	1495	1145	1313	1379	1391	1194	1232	1266
			4923	3986	4596	4330	1474	1177	1286	1381	1461	1154	1200	1244
			4901	3932	4575	4305	1501	1125	1312	1367	1433	1147	1196	1233
			4886	3893	4479	4301	1460	1121	1286	1367	1438	1147	1191	1235
			4872	3907	4441	4263	1420	1140	1257	1378	1392	1125	1185	1207
			4864	3845	4416	4297	1410	1159	1260	1332	1403	1099	1178	1213
			4900	3781	4395	4241	1415	1113	1257	1327	1411	1085	1174	1231
			4939	3728	4433	4298	1431	1110	1237	1309	1425	1066	1137	1222
			4933	3819	4481	4315	1442	1096	1225	1298	1389	1056	1117	1178
			4833	3703	4385	4149	1408	1115	1228	1294	1442	1057	1143	1172
			4970	3736	4372	4234	1404	1059	1197	1291	1409	1020	1141	1173
			4810	3696	4419	4215	1404	1060	1207	1268	1397	1034	1112	1151
			4982	3591	4270	4173	1387	1052	1195	1269	1416	1017	1101	1171
			5005	3606	4326	4144	1394	1029	1187	1248	1399	1028	1119	1178
			4870	3588	4205	4089	1385	1033	1174	1255	1383	986	1087	1162
			4871	3509	4292	4175	1396	1041	1170	1284	1367	1009	1109	1175
			4812	3495	4274	4078	1376	1035	1180	1253	1380	986	1088	1144
			4893	3523	4198	4040	1393	1017	1163	1262	1389	998	1070	1145
			4891	3438	4119	4025	1385	986	1159	1256	1368	987	1061	1147
			4847	3376	4020	4069	1381	977	1152	1238	1346	968	1089	1143
			4811	3340	4123	4004	1394	1001	1137	1237	1365	962	1020	1147
			4838	3330	4036	3976	1402	993	1139	1242	1378	956	1050	1153
			4788	3320	4010	3956	1366	968	1121	1234	1352	957	1065	1138
			4832	3323	3941	3957	1360	983	1134	1224	1377	947	1057	1117
			4779	3251	3963	3849	1367	969	1132	1204	1357	950	1044	1112
			4745	3233	3920	3927	1353	980	1119	1249	1366	937	1017	1110
			4797	3255	4011	3883	1366	1000	1139	1210	1369	946	1028	1096
			4777	3212	3940	3890	1384	955	1113	1203	1358	940	1028	1091
			4839	3200	3890	3912	1377	958	1090	1235	1377	941	1003	1115
			4776	3158	3773	3826	1348	943	1123	1204	1354	923	1007	1118
			4788	3167	3745	3832	1362	958	1089	1208	1368	927	1006	1091
			4762	3066	3814	3820	1409	939	1045	1188	1355	891	1006	1117
			4759	3049	3749	3858	1377	932	1127	1172	1344	891	1010	1076
			4710	3059	3803	3881	1390	951	1082	1177	1358	896	996	1105
			4791	3021	3749	3820	1323	930	1098	1186	1343	897	1013	1081
			4721	2961	3698	3768	1370	924	1099	1156	1338	890	996	1083
			4723	2980	3717	3802	1378	928	1065	1164	1342	885	985	1090
			4709	2952	3707	3776	1358	926	1058	1157	1355	892	988	1080
			4745	2954	3644	3769	1352	907	1075	1170	1344	870	979	1066
			4729	2876	3652	3771	1355	901	1042	1177	1327	857	978	1076
			4694	2903	3687	3733	1387	909	1063	1158	1367	850	964	1063
			4663	2835	3578	3721	1358	913	1077	1164	1377	847	941	1071
			4694	2846	3597	3708	1362	889	1061	1155	1345	847	962	1056
			4724	2793	3561	3685	1351	881	1053	1151	1363	840	957	1059
			4648	2745	3546	3633	1346	885	1027	1135	1324	857	950	1042
			4694	2791	3567	3656	1334	878	1018	1133	1337	855	954	1058
			4705	2737	3501	3648	1350	879	1064	1135	1328	856	929	1037
			4719	2692	3574	3661	1347	894	1090	1130	1322	838	940	1048
			4708	2746	3606	3609	1337	883	1017	1134	1317	829	946	1041
			4824	2725	3536	3595	1332	868	1017	1116	1339	824	944	1037
			4650	2648	3486	3607	1347	885	1029	1126	1361	832	915	1029
			4744	2635	3510	3528	1315	878	981	1140	1332	831	941	1034
			4684	2615	3431	3596	1353	844	1018	1123	1344	829	944	1018
			4720	2566	3425	3516	1328	868	1024	1126	1299	830	927	1022
			4721	2553	3401	3558	1323	859	982	1119	1327	817	936	1033
			4710	2532	3487	3537	1341	857	1001	1094	1307	801	920	988
			4737	2482	3401	3488	1357	855	983	1127	1310	808	940	1025
			4745	2483	3358	3498	1323	857	986	1094	1317	812	898	1036
			4712	2438	3384	3526	1343	854	983	1110	1295	806	920	1009
			4747	2471	3376	3470	1347	839	979	1096	1313	813	914	996
			4683	2480	3335	3453	1338	849	980	1095	1304	806	888	992
			4724	2442	3321	3446	1326	828	978	1110	1335	819	906	1023
			4634	2440	3311	3481	1328	825	992	1085	1335	792	900	992
			4628	2389	3269	3481	1345	828	961	1090	1297	778	938	1009
			4689	2386	3238	3397	1356	813	982	1089	1329	796	915	1015
			4657	2336	3240	3412	1321	833	974	1070	1327	775	902	1001
			4641	2329	3297	3417	1335	834	972	1089	1326	765	887	979
			4696	2274	3210	3405	1332	837	956	1094	1327	783	878	993
			4804	2288	3228	3401	1356	820	954	1080	1304	793	887	974
			4664	2272	3148	3326	1318	823	975	1073	1322	770	887	973
			4625	2251	3180	3350	1308	822	965	1110	1275	765	872	961
			4658	2250	3232	3364	1320	803	968	1090	1325	776	891	992
			4685	2202	3162	3361	1317	815	960	1077	1303	779	894	972
			4629	2230	3112	3327	1304	776	944	1072	1299	756	864	977
			4414	545	607	637	1115	386	393	472	1209	362	387	586
			4433	558	607	634	1106	385	409	488	1213	368	391	556
			4437	553	588	625	1081	387	415	491	1213	373	386	513
			4418	539	592	622	1088	378	396	492	1203	375	388	501
			4428	541	591	613	1089	393	397	493	1180	369	384	467
			4441	528	585	635	1096	395	394	504	1212	359	386	474
			4392	536	578	623	1093	385	396	501	1182	367	379	457
			4367	535	583	606	1070	381	438	496	1190	358	380	428
			4434	525	611	625	1048	394	420	507	1171	363	383	412
			4417	527	615	612	1048	383	389	512	1162	364	376	415
			4383	533	606	621	1083	388	384	503	1174	369	378	416

## Sheet: Figure5K
SiNRAT1-S68A
LPR50
															Condition
		NORM.	Mn (uM) /Ga (mM)			Mn (uM) /Ga (mM)			Mn (uM) /Ga (mM)						Mean	SEM	N
Cycle Nr.	Time (min)		0/0	25/0	25/15	0/0	25/0	25/15	0/0	25/0	25/15			Time (min)	0 μM Mn2+/ 0 μM Ga3+			25 μM Mn2+/ 0 μM Ga3+			25 μM Mn2+/ 15 μM Ga3+
1	-5.79337		86.5377	86.9601	91.3572	144.396	157.599	163.482	144.809	153.048	171.286			-5.79337	125.248	19.3554	3	132.536	22.8257	3	142.042	25.4422	3
2	-5.72617		86.2585	87.8856	91.0532	140	153.227	166.256	143.955	157.744	170.516			-5.72617	123.405	18.6081	3	132.952	22.5709	3	142.608	25.8069	3
3	-5.6595		85.6203	86.919	91.6178	140.31	151.353	160.786	140.736	155.151	167.283			-5.6595	122.222	18.3012	3	131.141	22.1382	3	139.895	24.2115	3
4	-5.59283		85.2413	86.4459	90.4886	139.752	153.366	160.324	139.75	156.342	165.358			-5.59283	121.581	18.17	3	132.051	22.8188	3	138.723	24.1611	3
5	-5.52617		84.0846	86.0757	90.0326	136.842	151.214	160.94	140.21	149.825	167.052			-5.52617	120.379	18.1732	3	129.038	21.485	3	139.341	24.7174	3
6	-5.4595		85.4009	87.1452	92.0521	135.604	146.773	156.626	136.794	148.073	162.433			-5.4595	119.266	16.9361	3	127.33	20.0961	3	137.037	22.5547	3
7	-5.39283		84.8225	85.8906	91.7047	133.87	147.953	158.012	135.545	145.06	164.742			-5.39283	118.079	16.6354	3	126.301	20.2225	3	138.153	23.3053	3
8	-5.32617		84.8225	87.536	90.5537	134.489	146.495	155.701	135.085	147.442	157.121			-5.32617	118.132	16.6558	3	127.158	19.8128	3	134.459	21.9562	3
9	-5.25952		85.1416	86.2402	88.9902	131.889	143.789	153.698	132.786	141.626	159.199			-5.25952	116.605	15.734	3	123.885	18.8327	3	133.963	22.5422	3
10	-5.19283		85.1217	86.3431	90.5972	131.95	143.442	152.311	132.589	141.556	155.812			-5.19283	116.554	15.7171	3	123.78	18.7265	3	132.907	21.179	3
11	-5.12617		83.8851	86.8161	88.6645	129.783	141.638	151.849	134.494	142.327	153.426			-5.12617	116.054	16.1419	3	123.594	18.3898	3	131.313	21.3291	3
12	-5.0595		83.7256	86.8367	89.4028	127.802	140.458	151.156	130.552	138.332	149.731			-5.0595	114.026	15.1712	3	121.876	17.5302	3	130.096	20.3509	3
13	-4.9928		84.4436	88.6261	89.316	126.13	139.417	150.385	128.318	138.122	149.731			-4.9928	112.964	14.2741	3	122.055	16.7187	3	129.811	20.2482	3
14	-4.92612		82.9876	85.9523	88.0782	123.653	139.278	145.84	125.887	136.37	150.115			-4.92612	110.843	13.9424	3	120.534	17.311	3	128.011	20.0046	3
15	-4.85947		84.284	85.8906	88.4691	124.52	137.543	146.379	128.975	133.917	146.266			-4.85947	112.593	14.2128	3	119.117	16.6462	3	127.038	19.2846	3
16	-4.7928		83.0475	86.3225	88.4908	123.529	136.294	145.378	126.675	134.968	145.343			-4.7928	111.084	14.0477	3	119.195	16.4407	3	126.404	18.9564	3
17	-4.72613		83.5461	85.6849	89.4245	120.557	136.502	139.445	119.448	133.427	143.726			-4.72613	107.85	12.1564	3	118.538	16.4505	3	124.199	17.4309	3
18	-4.65947		81.771	84.204	88.7948	120.248	132.477	139.599	120.762	130.694	141.109			-4.65947	107.594	12.9122	3	115.792	15.8022	3	123.168	17.1919	3
19	-4.5928		81.9505	86.3842	90.0326	117.523	130.951	137.519	119.842	130.343	140.57			-4.5928	106.439	12.2624	3	115.893	14.7553	3	122.707	16.361	3
20	-4.52613		82.5489	85.726	87.2964	116.656	130.951	137.134	121.353	129.222	138.953			-4.52613	106.853	12.2274	3	115.3	14.7952	3	121.128	16.9239	3
21	-4.45947		81.2724	84.965	89.0771	117.214	128.938	135.131	118.528	129.152	136.644			-4.45947	105.671	12.2054	3	114.352	14.6935	3	120.284	15.6095	3
22	-4.39305		82.0303	84.7388	86.2106	116.471	126.926	135.439	117.214	127.61	139.877			-4.39305	105.238	11.606	3	113.092	14.1778	3	120.509	17.1969	3
23	-4.32635		81.4519	85.9317	87.4484	114.985	127.342	134.361	116.754	127.47	136.028			-4.32635	104.397	11.4839	3	113.581	13.8249	3	119.279	15.9225	3
24	-4.25942		82.489	83.8132	87.557	116.037	127.342	135.747	115.703	124.947	133.718			-4.25942	104.743	11.1274	3	112.034	14.1274	3	119.007	15.7362	3
25	-4.19275		82.0901	83.2374	86.645	114.241	128.036	130.431	113.601	125.018	133.641			-4.19275	103.311	10.6119	3	112.097	14.4561	3	116.906	15.1588	3
26	-4.12608		81.6115	84.5125	87.2096	115.108	125.746	131.433	114.783	124.247	135.335			-4.12608	103.834	11.1118	3	111.502	13.5015	3	117.992	15.4326	3
27	-4.0594		80.8337	84.2452	86.8838	110.96	123.803	133.051	114.258	124.387	129.638			-4.0594	102.017	10.6344	3	110.812	13.2843	3	116.524	14.8529	3
28	-3.99273		81.2525	83.3402	88.0999	112.136	123.664	131.048	113.601	121.233	129.022			-3.99273	102.33	10.5471	3	109.413	13.0551	3	116.057	13.9906	3
29	-3.92607		80.714	84.7799	88.3822	111.765	124.011	129.815	110.447	120.883	126.944			-3.92607	100.975	10.1377	3	109.891	12.5881	3	115.047	13.3582	3
30	-3.8594		81.771	83.443	86.4495	111.579	122.554	128.968	111.17	121.654	130.947			-3.8594	101.506	9.86843	3	109.217	12.8895	3	115.455	14.5138	3
31	-3.79273		81.412	83.2991	87.1878	108.421	120.888	126.81	111.827	117.87	128.483			-3.79273	100.553	9.62094	3	107.352	12.0582	3	114.161	13.495	3
32	-3.72607		80.3949	83.6898	86.6667	111.95	121.305	129.892	111.761	120.533	126.867			-3.72607	101.369	10.4871	3	108.509	12.4116	3	114.475	13.9317	3
33	-3.6596		79.5572	83.4636	86.5798	107.368	119.084	129.122	108.147	119.061	126.482			-3.6596	98.3576	9.40287	3	107.203	11.8696	3	114.061	13.7618	3
34	-3.59293		80.8935	83.7515	87.8393	108.854	119.362	128.814	110.053	119.131	129.561			-3.59293	99.9335	9.5263	3	107.415	11.8318	3	115.405	13.7844	3
35	-3.52602		80.6143	84.1012	86.9924	107.492	120.958	128.582	107.819	117.659	126.79			-3.52602	98.6418	9.01423	3	107.573	11.7743	3	114.122	13.5744	3
36	-3.45935		80.4547	84.0189	86.6667	106.873	120.125	127.119	110.053	116.819	125.327			-3.45935	99.1268	9.38105	3	106.987	11.5239	3	113.037	13.1955	3
37	-3.39268		79.3578	82.065	86.9055	106.625	117.418	126.579	107.227	118.29	128.022			-3.39268	97.7368	9.19116	3	105.925	11.9324	3	113.836	13.4714	3
38	-3.32602		80.714	84.1835	86.2324	106.254	118.251	124.807	105.848	117.239	126.79			-3.32602	97.6052	8.4464	3	106.558	11.191	3	112.61	13.2012	3
39	-3.25958		81.2525	82.1473	86.7101	107.678	118.321	124.114	108.804	113.875	124.403			-3.25958	99.2449	9.00208	3	104.781	11.3894	3	111.743	12.5165	3
40	-3.19267		80.3351	82.9288	86.1889	106.13	118.182	124.961	105.519	113.595	125.25			-3.19267	97.3281	8.49833	3	104.902	11.066	3	112.134	12.9726	3
41	-3.12627		80.4148	82.9083	85.2334	105.882	117.418	122.342	107.884	114.506	125.789			-3.12627	98.0605	8.84176	3	104.944	11.05	3	111.122	12.9822	3
42	-3.0596		80.0957	82.7643	85.3855	105.573	116.308	122.342	107.03	112.894	125.019			-3.0596	97.5662	8.74538	3	103.989	10.6579	3	110.916	12.7884	3
43	-2.99273		81.1727	82.9083	87.101	103.963	113.324	124.807	103.679	115.487	125.558			-2.99273	96.2716	7.5499	3	103.906	10.5176	3	112.489	12.6958	3
44	-2.92607		81.1528	82.6615	84.6254	103.653	114.573	121.726	101.774	115.417	124.326			-2.92607	95.5267	7.20741	3	104.217	10.7806	3	110.226	12.8222	3
45	-2.8594		79.7168	83.3813	84.9729	103.901	115.337	124.191	105.65	112.404	124.095			-2.8594	96.4227	8.36823	3	103.707	10.1981	3	111.086	13.0568	3
46	-2.79272		81.1129	84.5742	86.2541	104.396	114.573	124.653	103.548	113.104	124.326			-2.79272	96.3524	7.62369	3	104.084	9.76406	3	111.745	12.7456	3
47	-2.72605		79.9761	82.8877	85.9718	104.149	114.573	123.883	104.336	111.773	128.714			-2.72605	96.1537	8.08899	3	103.078	10.1274	3	112.856	13.5145	3
48	-2.65938		79.5572	82.1267	84.7557	102.91	114.087	120.185	104.928	115.837	123.249			-2.65938	95.7984	8.14143	3	104.017	10.9569	3	109.396	12.3521	3
49	-2.59272		78.7395	82.2707	85.5375	102.663	113.532	121.957	104.205	112.544	122.017			-2.59272	95.2023	8.24344	3	102.782	10.2598	3	109.837	12.1498	3
50	-1.53142		92.8002	96.7709	99.6743	94.9226	106.246	113.79	97.9632	104.345	113.01			-1.53142	95.2287	1.49828	3	102.454	2.89396	3	108.825	4.58085	3
51	-1.48777		92.2218	97.3879	101.607	95.2322	105.552	109.861	97.9632	102.242	112.394			-1.48777	95.1391	1.65806	3	101.727	2.37072	3	107.954	3.25674	3
52	-1.44427		93.1791	96.6269	99.8914	94.7368	105.829	109.399	97.1748	101.752	112.702			-1.44427	95.0302	1.16274	3	101.403	2.66224	3	107.331	3.83999	3
53	-1.4008		94.5951	95.7425	98.8925	94.613	105.205	110.555	95.795	100.35	112.471			-1.4008	95.001	0.397015	3	100.433	2.73181	3	107.306	4.24302	3
54	-1.35703		90.5864	96.051	100.043	93.808	106.315	110.324	97.3062	102.873	112.086			-1.35703	93.9002	1.94039	3	101.746	3.01607	3	107.484	3.75513	3
55	-1.31355		92.9797	95.0638	101.39	92.7554	106.662	110.247	97.7004	102.313	111.393			-1.31355	94.4785	1.61225	3	101.346	3.38281	3	107.677	3.16077	3
56	-1.27007		92.2018	94.385	100.261	93.9938	104.997	109.245	95.8607	100.21	113.626			-1.27007	94.0188	1.0563	3	99.8639	3.06816	3	107.71	3.93378	3
57	-1.2263		91.6833	95.146	98.3496	94.3034	102.29	108.937	94.7438	100.561	113.087			-1.2263	93.5768	0.955261	3	99.3322	2.15183	3	106.791	4.3875	3
58	-1.18282		91.3043	93.6652	97.0684	92.322	102.845	108.243	94.8752	100.981	109.392			-1.18282	92.8338	1.0621	3	99.1638	2.8015	3	104.901	3.93042	3
59	-1.13907		91.444	95.3106	99.0662	91.7647	104.719	108.398	95.3351	100.07	110.239			-1.13907	92.8479	1.24703	3	100.033	2.71601	3	105.901	3.45836	3
60	-1.09558		90.1675	93.3155	98.3062	91.3932	101.874	107.011	94.2838	98.9488	109.469			-1.09558	91.9482	1.22025	3	98.046	2.51144	3	104.929	3.38638	3
61	-1.0521		89.3299	92.5751	99.9131	93.3127	101.457	105.316	94.1524	101.261	112.317			-1.0521	92.265	1.48745	3	98.4313	2.92864	3	105.849	3.59064	3
62	-1.0086		89.8285	93.0276	97.8936	90.2786	101.18	107.011	93.364	101.121	110.162			-1.0086	91.157	1.1111	3	98.4428	2.70768	3	105.022	3.67845	3
63	-0.965117		88.6717	94.1794	98.8491	92.322	102.706	104.777	93.7582	98.1079	109.315			-0.965117	91.584	1.514	3	98.3313	2.46411	3	104.314	3.03008	3
64	-0.921367		90.5864	94.2822	97.8719	91.6409	101.388	106.009	91.1301	97.6174	109.777			-0.921367	91.1191	0.30446	3	97.7625	2.05252	3	104.553	3.51298	3
65	-0.877883		90.7459	92.102	97.6547	91.6409	102.012	107.319	91.3272	96.9867	108.314			-0.877883	91.238	0.262175	3	97.0337	2.86101	3	104.429	3.39944	3
66	-0.834133		90.1077	93.0893	98.8925	91.5789	101.388	104.314	91.6557	97.4772	107.929			-0.834133	91.1141	0.503699	3	97.3181	2.39693	3	103.712	2.62599	3
67	-0.790633		89.0905	93.7886	97.1553	90.8978	103.609	105.316	92.1156	97.5473	106.005			-0.790633	90.7013	0.878777	3	98.3148	2.86066	3	102.825	2.84196	3
68	-0.7469		89.3698	95.6397	97.8284	90.6502	99.1672	106.317	92.247	97.8977	107.39			-0.7469	90.7557	0.832273	3	97.5682	1.03157	3	103.845	3.02437	3
69	-0.7034		89.4894	94.3439	97.481	90.5882	100.902	103.929	94.1524	96.0757	105.389			-0.7034	91.41	1.40741	3	97.1073	1.96222	3	102.266	2.42947	3
70	0		100	100	100	100	100	100	100	100	100			0	100	0	3	100	0	3	100	0	3
71	0.0436167		100.08	99.8972	98.5885	99.9381	96.8078	98.9985	99.343	95.7954	101.771			0.0436167	99.787	0.225728	3	97.5001	1.23365	3	99.7858	0.999407	3
72	0.0871		101.077	97.3673	97.7633	96.4706	92.297	96.302	98.2917	90.6097	96.6898			0.0871	98.6131	1.33943	3	93.4247	2.03062	3	96.9184	0.437051	3
73	0.130583		99.4017	97.5319	97.633	97.2136	91.7418	95.6857	97.569	90.9601	95.689			0.130583	98.0614	0.677932	3	93.4113	2.07263	3	96.3359	0.648561	3
74	0.174333		99.6211	95.7219	96.8512	95.356	92.1582	93.3744	96.9777	88.9278	92.9176			0.174333	97.3183	1.24293	3	92.2693	1.96208	3	94.3811	1.24209	3
75	0.217817		101.356	95.9687	94.3757	95.6656	89.66	92.2958	96.2549	88.6475	95.9199			0.217817	97.7589	1.80667	3	91.4254	2.29039	3	94.1972	1.04999	3
76	0.261567		99.4416	93.6035	94.1151	98.7616	89.7294	90.9861	98.1603	86.8956	92.1478			0.261567	98.7878	0.370094	3	90.0761	1.94414	3	92.4163	0.913178	3
77	0.305067		100.419	92.4722	93.5939	96.0991	86.4677	91.7565	96.1235	85.0035	91.8399			0.305067	97.5471	1.43585	3	87.9812	2.28497	3	92.3968	0.599052	3
78	0.3488		99.7607	91.8963	93.3333	94.4892	85.8432	90.832	97.2405	84.9334	90.3002			0.3488	97.1634	1.52224	3	87.5576	2.18519	3	91.4885	0.935086	3
79	0.3923		99.5213	92.0197	91.6612	95.9133	84.941	88.2897	97.1091	82.0603	86.6051			0.3923	97.5146	1.0611	3	86.3403	2.95896	3	88.852	1.48642	3
80	0.43605		98.8034	92.6779	91.2269	94.7368	83.9695	86.2866	98.6859	82.6209	86.1432			0.43605	97.4087	1.33636	3	86.4228	3.15171	3	87.8856	1.67119	3
81	0.479817		99.5014	90.5183	90.9446	93.3127	80.8466	86.8259	91.59	81.3595	87.3749			0.479817	94.8014	2.40206	3	84.2415	3.14191	3	88.3818	1.29118	3
82	0.523283		99.0427	90.6006	90.7058	93.3127	81.4018	84.3606	95.2037	79.3973	85.6043			0.523283	95.853	1.68567	3	83.7999	3.44922	3	86.8902	1.94127	3
83	0.566783		100.299	88.3381	88.4691	92.8793	80.0139	85.3621	94.4809	79.117	86.0662			0.566783	95.8865	2.25429	3	82.4897	2.93566	3	86.6325	0.940529	3
84	0.610533		99.282	88.0708	89.0119	93.3127	79.8751	82.5886	93.0355	78.4863	82.525			0.610533	95.2101	2.03755	3	82.1441	2.99034	3	84.7085	2.15179	3
85	0.654017		99.3418	87.9473	87.9262	92.5697	79.4587	83.1279	94.6124	77.5053	84.5266			0.654017	95.5079	2.00559	3	81.6371	3.20512	3	85.1935	1.42472	3
86	0.697767		99.1823	89.1197	87.0141	92.1981	78.9035	80.4314	92.3127	77.7856	82.679			0.697767	94.5644	2.30919	3	81.9363	3.60619	3	83.3748	1.93185	3
87	0.741517		99.5612	85.6643	86.1021	92.9412	76.7523	79.8921	93.2326	74.0715	81.9861			0.741517	95.245	2.15975	3	78.8294	3.50401	3	82.6601	1.82405	3
88	0.785		98.225	86.3431	84.5385	93.4365	75.7807	80.3544	93.8239	75.3329	80.6774			0.785	95.1618	1.53566	3	79.1522	3.59775	3	81.8568	1.34412	3
89	0.8285		99.8006	85.5409	85.2117	91.2074	75.4337	78.9676	92.7727	74.0014	80.7544			0.8285	94.5936	2.64242	3	78.3254	3.6314	3	81.6446	1.85665	3
90	0.87225		98.225	84.6154	84.4951	92.0124	75.6419	78.5824	92.707	73.1605	79.6767			0.87225	94.3148	1.96535	3	77.8059	3.47927	3	80.9181	1.8162	3
91	0.915733		98.8432	85.6438	82.2801	93.4365	73.4906	77.8891	94.021	72.74	79.2918			0.915733	95.4336	1.71315	3	77.2915	4.18177	3	79.8203	1.29485	3
92	0.959483		97.8061	85.1501	83.3876	91.0836	74.0458	77.4268	91.1301	72.8802	77.2132			0.959483	93.3399	2.23314	3	77.3587	3.91022	3	79.3426	2.02347	3
93	1.00323		96.9485	83.4225	81.8241	92.5697	71.6169	76.1941	89.7503	71.4085	76.8283			1.00323	93.0895	2.09414	3	75.4826	3.97036	3	78.2822	1.78039	3
94	1.04672		98.7036	82.7026	83.3008	90.2167	73.6294	76.4253	92.4442	68.6055	77.8291			1.04672	93.7882	2.54045	3	74.9792	4.12507	3	79.185	2.09738	3
95	1.09022		97.7663	81.7153	81.4332	91.7028	72.0333	74.4222	89.6846	69.7968	76.9053			1.09022	93.0512	2.42843	3	74.5151	3.65753	3	77.5869	2.0524	3
96	1.13397		96.6893	80.7075	78.9359	91.3313	71.4781	75.0385	92.9041	70.4975	76.0585			1.13397	93.6415	1.59007	3	74.2277	3.25224	3	76.6777	1.1669	3
97	1.17768		98.584	79.2884	77.9805	90.5263	70.7842	76.3482	91.7871	70.9881	75.7506			1.17768	93.6325	2.50236	3	73.6869	2.80136	3	76.6931	0.666405	3
98	1.22118		94.8744	79.8848	78.5668	92.8793	69.8126	74.8074	90.0131	68.6055	74.5958			1.22118	92.5889	1.4108	3	72.7676	3.57561	3	75.99	1.28983	3
99	1.26492		96.5497	78.6713	77.3724	89.969	70.229	74.6533	90.0788	68.7456	73.903			1.26492	92.1992	2.17547	3	72.5487	3.09114	3	75.3096	1.05392	3
100	1.30867		96.5895	78.0954	77.3073	92.3839	68.7717	73.7288	91.5243	67.8346	74.057			1.30867	93.4993	1.56495	3	71.5672	3.27528	3	75.031	1.14206	3
101	1.35217		98.2449	77.4167	77.329	91.6409	69.0493	74.037	90.6702	67.5543	72.2864			1.35217	93.5186	2.37969	3	71.3401	3.0688	3	74.5508	1.47817	3
102	1.39592		96.7491	78.4451	75.8958	92.3839	68.4941	73.6518	91.2615	68.3952	74.4419			1.39592	93.4648	1.67379	3	71.7781	3.33359	3	74.6631	0.657166	3
103	1.4394		95.8915	76.4089	75.8523	90.7121	67.9389	72.1109	90.0788	66.1528	73.0562			1.4394	92.2275	1.84111	3	70.1669	3.16332	3	73.6732	1.12324	3
104	1.48315		97.0084	77.0053	74.7014	90.031	67.6613	70.1849	91.1301	66.6433	73.5181			1.48315	92.7231	2.16598	3	70.4367	3.29746	3	72.8015	1.35214	3
105	1.5269		96.2505	76.306	74.6363	91.7647	67.9389	71.2635	91.4586	66.6433	72.2864			1.5269	93.1579	1.5488	3	70.2961	3.02816	3	72.7287	0.998441	3
106	1.5704		97.7064	75.4216	74.5277	90.774	66.6898	72.4191	89.6846	65.3819	73.1332			1.5704	92.7217	2.51213	3	69.1645	3.15129	3	73.36	0.619169	3
107	1.61388		95.4527	74.023	73.8762	90.8978	65.9958	69.7997	89.2247	65.9425	71.9015			1.61388	91.8584	1.86093	3	68.6538	2.68466	3	71.8591	1.17698	3
108	1.65762		95.712	74.8869	72.9207	91.8266	65.4407	70.8012	91.2615	64.4008	71.4396			1.65762	92.9334	1.39886	3	68.2428	3.33558	3	71.7205	0.627768	3
109	1.70112		94.6949	74.6195	73.2465	88.1115	65.9264	70.1079	90.0131	65.3819	68.5912			1.70112	90.9398	1.95613	3	68.6426	2.99257	3	70.6485	1.37077	3
110	1.74487		95.3929	73.7145	72.2041	90.4644	64.5385	69.5686	89.4218	65.3118	69.746			1.74487	91.7597	1.84136	3	67.855	2.93827	3	70.5062	0.850498	3
111	1.78835		96.2704	73.0152	71.5744	88.9164	65.9264	68.8752	90.6702	64.8914	70.5928			1.78835	91.9523	2.21761	3	67.9443	2.55298	3	70.3474	0.788784	3
112	1.8321		94.5552	71.9457	71.3138	89.9071	65.9264	69.8767	91.3272	62.8591	67.0516			1.8321	91.9299	1.37522	3	66.9104	2.6688	3	69.414	1.25196	3
113	1.87587		94.8744	72.2748	71.0532	88.9164	65.0243	68.7982	89.9474	63.5599	68.6682			1.87587	91.2461	1.83839	3	66.953	2.69426	3	69.5065	0.774249	3
114	1.91935		94.6749	70.9173	70.1846	89.8452	64.8855	67.9507	89.0933	63.4198	66.0508			1.91935	91.2045	1.74874	3	66.4075	2.29425	3	68.062	1.19461	3
115	1.96283		94.2361	71.2053	69.0988	91.7647	63.1506	68.3359	89.816	62.9292	68.7452			1.96283	91.939	1.27895	3	65.7617	2.72254	3	68.7266	0.220429	3
116	2.00658		94.6949	69.9301	70.3149	89.5356	65.0243	67.4114	88.8305	62.2985	66.6667			2.00658	91.0203	1.84851	3	65.751	2.2328	3	68.131	1.11291	3
117	2.05007		94.0168	70.0946	69.4897	88.6068	63.9833	66.8721	87.4507	61.5277	68.6682			2.05007	90.0248	2.0237	3	65.2019	2.547	3	68.3433	0.772892	3
118	2.09382		93.2589	69.6421	68.8599	89.9071	61.3463	67.6425	89.6189	62.0883	66.3587			2.09382	90.9283	1.16825	3	64.3589	2.65028	3	67.6204	0.722116	3
119	2.13732		95.0339	69.7655	67.3398	89.7833	63.8446	65.6394	89.6189	62.9292	66.5127			2.13732	91.4787	1.77824	3	65.5131	2.14257	3	66.4973	0.490923	3
120	2.18105		94.276	67.5648	67.1227	90.1548	62.2484	67.7966	89.5532	62.0182	66.5897			2.18105	91.328	1.4842	3	63.9438	1.81171	3	67.1697	0.349201	3
121	2.22455		94.4156	68.2435	67.3181	88.7926	62.0402	64.792	87.0565	60.6167	68.2063			2.22455	90.0882	2.22098	3	63.6335	2.34136	3	66.7721	1.02274	3
122	2.27402		94.655	67.3797	67.0793	89.1641	62.3178	64.9461	88.502	60.2663	64.6651			2.27402	90.7737	1.95004	3	63.3213	2.11386	3	65.5635	0.762214	3
123	2.34068		95.3131	66.5158	66.0803	90.7121	61.0687	66.1017	89.6189	60.0561	65.204			2.34068	91.8814	1.74465	3	62.5469	2.0059	3	65.7953	0.295738	3
124	2.40737		95.5923	65.8165	64.7774	88.8545	61.9015	65.0231	88.4363	60.1261	64.7421			2.40737	90.961	2.3188	3	62.6147	1.68094	3	64.8475	0.0883715	3
125	2.47403		96.1308	67.1123	64.1694	89.1022	61.9015	65.8706	88.3706	59.0049	64.3572			2.47403	91.2012	2.47385	3	62.6729	2.37197	3	64.799	0.538496	3
126	2.54095		93.3387	65.4463	65.4289	89.1641	61.2769	65.1002	90.6702	58.5844	64.8961			2.54095	91.0576	1.22056	3	61.7692	1.99609	3	65.1417	0.155206	3
127	2.60753		95.6322	63.842	63.0185	88.7926	59.9584	64.3297	89.5532	59.7057	65.204			2.60753	91.326	2.16428	3	61.1687	1.33866	3	64.1841	0.635102	3
128	2.6742		95.2932	64.2123	63.9957	89.7833	59.6808	64.2527	87.1222	59.2151	64.4342			2.6742	90.7329	2.40607	3	61.0361	1.59378	3	64.2275	0.127215	3
129	2.74087		94.3558	63.7803	62.9967	87.9876	60.5829	64.4838	88.1078	59.3553	64.2032			2.74087	90.1504	2.10299	3	61.2395	1.31891	3	63.8946	0.456177	3
130	2.80753		94.6949	64.5208	61.8893	90.0929	59.6808	63.0971	86.3995	58.8648	63.8953			2.80753	90.3957	2.39945	3	61.0221	1.76512	3	62.9605	0.583106	3
131	2.8742		94.4954	62.4846	60.8903	86.935	59.542	63.6364	87.5164	58.0238	64.7421			2.8742	89.6489	2.42904	3	60.0168	1.30941	3	63.0896	1.14502	3
132	2.94087		93.7375	63.225	61.5852	88.1115	60.1666	64.0986	86.2024	58.4443	61.6628			2.94087	89.3505	2.26171	3	60.612	1.39793	3	62.4489	0.825166	3
133	3.00753		95.3331	62.608	60.9989	88.2353	60.4441	63.9445	87.8449	57.9537	64.2802			3.00753	90.4711	2.4336	3	60.3353	1.34466	3	63.0746	1.04234	3
134	3.0742		94.8345	60.8803	60.3909	88.5449	58.3622	61.4792	87.7792	57.9537	65.204			3.0742	90.3862	2.23509	3	59.0654	0.915064	3	62.358	1.45726	3
135	3.14087		93.9769	60.6952	59.2617	89.1641	58.4316	61.3251	87.6478	56.9026	63.8953			3.14087	90.2629	1.90786	3	58.6765	1.10165	3	61.494	1.34028	3
136	3.20753		92.6406	61.1271	59.6308	87.678	58.0847	62.5578	85.4796	57.7435	62.7406			3.20753	88.5994	2.11791	3	58.9851	1.07552	3	61.6431	1.00749	3
137	3.2742		95.353	60.4895	59.0011	88.483	58.501	63.8675	87.5821	57.1128	60.97			3.2742	90.4727	2.45397	3	58.7011	0.979887	3	61.2795	1.41331	3
138	3.34087		93.5979	59.9753	59.3485	88.6068	59.0562	62.4807	87.5164	56.9727	61.6628			3.34087	89.9071	1.87209	3	58.6681	0.888251	3	61.164	0.937955	3
139	3.40753		93.8173	59.3377	59.4571	86.0681	56.8355	60.7858	87.9763	57.0427	61.3549			3.40753	89.2873	2.33105	3	57.7387	0.801761	3	60.5326	0.562281	3
140	3.4742		93.199	60.5306	58.2845	87.8019	58.9868	60.9399	86.4652	57.5333	60.3541			3.4742	89.1554	2.05833	3	59.0169	0.865394	3	59.8595	0.805466	3
141	3.54087		93.2988	58.5973	57.5461	88.8545	57.3213	60.9399	87.5164	55.7113	62.5096			3.54087	89.8899	1.74765	3	57.21	0.834977	3	60.3319	1.46473	3
142	3.60752		94.5154	59.1937	57.2204	89.226	58.1541	61.4792	86.071	55.7113	61.2009			3.60752	89.9374	2.46351	3	57.6864	1.03214	3	59.9668	1.37556	3
143	3.6742		93.7176	59.0292	57.5679	87.678	57.1825	60.9399	86.4652	55.7814	61.047			3.6742	89.2869	2.24283	3	57.331	0.94051	3	59.8516	1.14228	3
144	3.74087		92.6007	57.3221	56.5255	86.6254	56.7661	61.5562	84.6255	54.0995	59.8152			3.74087	87.9505	2.3957	3	56.0626	0.994568	3	59.299	1.475	3
145	3.80752		92.1021	56.9313	55.5049	87.6161	57.3213	60.8629	85.6767	55.6412	60.739			3.80752	88.465	1.90279	3	56.6313	0.507671	3	59.0356	1.76572	3
146	3.87418		93.3985	56.1703	55.0923	89.226	57.3907	59.7843	86.7937	55.2908	63.2025			3.87418	89.8061	1.92857	3	56.2839	0.60884	3	59.3597	2.35081	3
147	3.94085		91.9426	56.1703	55.4832	86.3777	56.7661	59.168	86.728	54.0294	61.4319			3.94085	88.3494	1.79941	3	55.6553	0.830925	3	58.6943	1.73349	3
148	4.00752		92.7004	56.8696	54.8534	87.7399	55.5864	59.0139	85.3482	54.7302	59.5073			4.00752	88.5962	2.16515	3	55.7287	0.621678	3	57.7915	1.47595	3
149	4.07418		93.3187	56.0058	54.7448	88.8545	57.1825	59.8613	84.8883	53.679	59.8922			4.07418	89.0205	2.43506	3	55.6224	1.02936	3	58.1661	1.71067	3
150	5.47742		86.0391	13.6981	13.9848	72.8793	27.2033	34.4376	85.4796	27.4001	49.0377			5.47742	81.466	4.2964	3	22.7672	4.53491	3	32.4867	10.1658	3
151	5.52102		87.1959	13.8626	14.2237	72.8793	27.5503	34.7458	84.0342	26.4191	48.8838			5.52102	81.3698	4.34225	3	22.6107	4.3862	3	32.6177	10.0619	3
152	5.5645		85.7798	13.3896	14.3322	73.1269	28.1055	34.4376	83.9028	27.5403	46.8052			5.5645	80.9365	3.9422	3	23.0118	4.81388	3	31.8584	9.46243	3
153	5.608		86.3183	13.7186	14.354	70.9598	25.2602	34.4376	84.6912	26.9797	45.7275			5.608	80.6564	4.87103	3	21.9862	4.16347	3	31.5063	9.17458	3
154	5.65173		85.2214	13.6158	14.3105	73.065	27.4115	35.208	84.4941	26.8395	44.8807			5.65173	80.9268	3.93651	3	22.6223	4.50627	3	31.4664	9.02096	3
155	5.6955		86.0191	13.5747	13.9631	71.8885	26.5094	34.5917	81.5375	26.349	43.649			5.6955	79.815	4.16907	3	22.1443	4.28509	3	30.7346	8.7839	3
156	5.73898		85.72	14.0889	14.3322	72.1981	26.6482	34.1294	84.1656	27.1899	43.341			5.73898	80.6946	4.27184	3	22.6423	4.27959	3	30.6009	8.55794	3
157	5.78273		84.5632	13.5335	14.202	71.6409	26.787	34.6687	83.18	26.4191	40.9546			5.78273	79.7947	4.09642	3	22.2465	4.35779	3	29.9417	8.07639	3
158	5.82648		84.8424	13.4101	13.9631	71.3932	27.0645	34.2065	81.1432	25.9285	40.7236			5.82648	79.1263	4.0113	3	22.1344	4.37445	3	29.6311	8.05673	3
159	5.86997		86.2585	13.8832	13.8111	70.5882	26.5094	34.5917	82.0631	25.5781	39.8768			5.86997	79.6366	4.68348	3	21.9902	4.06243	3	29.4265	7.9554	3
160	5.91372		84.7228	13.5747	14.354	71.9505	26.9951	34.5917	81.0118	25.438	39.7229			5.91372	79.2284	3.79335	3	22.0026	4.23787	3	29.5562	7.74409	3
		RAW	Mn (uM) /Ga (mM)			Mn (uM) /Ga (mM)			Mn (uM) /Ga (mM)
			0/0	25/0	25/15	0/0	25/0	25/15	0/0	25/0	25/15
			4339	4228	4207	2332	2271	2122	2204	2184	2225
			4325	4273	4193	2261	2208	2158	2191	2251	2215
			4293	4226	4219	2266	2181	2087	2142	2214	2173
			4274	4203	4167	2257	2210	2081	2127	2231	2148
			4216	4185	4146	2210	2179	2089	2134	2138	2170
			4282	4237	4239	2190	2115	2033	2082	2113	2110
			4253	4176	4223	2162	2132	2051	2063	2070	2140
			4253	4256	4170	2172	2111	2021	2056	2104	2041
			4269	4193	4098	2130	2072	1995	2021	2021	2068
			4268	4198	4172	2131	2067	1977	2018	2020	2024
			4206	4221	4083	2096	2041	1971	2047	2031	1993
			4198	4222	4117	2064	2024	1962	1987	1974	1945
			4234	4309	4113	2037	2009	1952	1953	1971	1945
			4161	4179	4056	1997	2007	1893	1916	1946	1950
			4226	4176	4074	2011	1982	1900	1963	1911	1900
			4164	4197	4075	1995	1964	1887	1928	1926	1888
			4189	4166	4118	1947	1967	1810	1818	1904	1867
			4100	4094	4089	1942	1909	1812	1838	1865	1833
			4109	4200	4146	1898	1887	1785	1824	1860	1826
			4139	4168	4020	1884	1887	1780	1847	1844	1805
			4075	4131	4102	1893	1858	1754	1804	1843	1775
			4113	4120	3970	1881	1829	1758	1784	1821	1817
			4084	4178	4027	1857	1835	1744	1777	1819	1767
			4136	4075	4032	1874	1835	1762	1761	1783	1737
			4116	4047	3990	1845	1845	1693	1729	1784	1736
			4092	4109	4016	1859	1812	1706	1747	1773	1758
			4053	4096	4001	1792	1784	1727	1739	1775	1684
			4074	4052	4057	1811	1782	1701	1729	1730	1676
			4047	4122	4070	1805	1787	1685	1681	1725	1649
			4100	4057	3981	1802	1766	1674	1692	1736	1701
			4082	4050	4015	1751	1742	1646	1702	1682	1669
			4031	4069	3991	1808	1748	1686	1701	1720	1648
			3989	4058	3987	1734	1716	1676	1646	1699	1643
			4056	4072	4045	1758	1720	1672	1675	1700	1683
			4042	4089	4006	1736	1743	1669	1641	1679	1647
			4034	4085	3991	1726	1731	1650	1675	1667	1628
			3979	3990	4002	1722	1692	1643	1632	1688	1663
			4047	4093	3971	1716	1704	1620	1611	1673	1647
			4074	3994	3993	1739	1705	1611	1656	1625	1616
			4028	4032	3969	1714	1703	1622	1606	1621	1627
			4032	4031	3925	1710	1692	1588	1642	1634	1634
			4016	4024	3932	1705	1676	1588	1629	1611	1624
			4070	4031	4011	1679	1633	1620	1578	1648	1631
			4069	4019	3897	1674	1651	1580	1549	1647	1615
			3997	4054	3913	1678	1662	1612	1608	1604	1612
			4067	4112	3972	1686	1651	1618	1576	1614	1615
			4010	4030	3959	1682	1651	1608	1588	1595	1672
			3989	3993	3903	1662	1644	1560	1597	1653	1601
			3948	4000	3939	1658	1636	1583	1586	1606	1585
			4653	4705	4590	1533	1531	1477	1491	1489	1468
			4624	4735	4679	1538	1521	1426	1491	1459	1460
			4672	4698	4600	1530	1525	1420	1479	1452	1464
			4743	4655	4554	1528	1516	1435	1458	1432	1461
			4542	4670	4607	1515	1532	1432	1481	1468	1456
			4662	4622	4669	1498	1537	1431	1487	1460	1447
			4623	4589	4617	1518	1513	1418	1459	1430	1476
			4597	4626	4529	1523	1474	1414	1442	1435	1469
			4578	4554	4470	1491	1482	1405	1444	1441	1421
			4585	4634	4562	1482	1509	1407	1451	1428	1432
			4521	4537	4527	1476	1468	1389	1435	1412	1422
			4479	4501	4601	1507	1462	1367	1433	1445	1459
			4504	4523	4508	1458	1458	1389	1421	1443	1431
			4446	4579	4552	1491	1480	1360	1427	1400	1420
			4542	4584	4507	1480	1461	1376	1387	1393	1426
			4550	4478	4497	1480	1470	1393	1390	1384	1407
			4518	4526	4554	1479	1461	1354	1395	1391	1402
			4467	4560	4474	1468	1493	1367	1402	1392	1377
			4481	4650	4505	1464	1429	1380	1404	1397	1395
			4487	4587	4489	1463	1454	1349	1433	1371	1369
			5014	4862	4605	1615	1441	1298	1522	1427	1299
			5018	4857	4540	1614	1395	1285	1512	1367	1322
			5068	4734	4502	1558	1330	1250	1496	1293	1256
			4984	4742	4496	1570	1322	1242	1485	1298	1243
			4995	4654	4460	1540	1328	1212	1476	1269	1207
			5082	4666	4346	1545	1292	1198	1465	1265	1246
			4986	4551	4334	1595	1293	1181	1494	1240	1197
			5035	4496	4310	1552	1246	1191	1463	1213	1193
			5002	4468	4298	1526	1237	1179	1480	1212	1173
			4990	4474	4221	1549	1224	1146	1478	1171	1125
			4954	4506	4201	1530	1210	1120	1502	1179	1119
			4989	4401	4188	1507	1165	1127	1394	1161	1135
			4966	4405	4177	1507	1173	1095	1449	1133	1112
			5029	4295	4074	1500	1153	1108	1438	1129	1118
			4978	4282	4099	1507	1151	1072	1416	1120	1072
			4981	4276	4049	1495	1145	1079	1440	1106	1098
			4973	4333	4007	1489	1137	1044	1405	1110	1074
			4992	4165	3965	1501	1106	1037	1419	1057	1065
			4925	4198	3893	1509	1092	1043	1428	1075	1048
			5004	4159	3924	1473	1087	1025	1412	1056	1049
			4925	4114	3891	1486	1090	1020	1411	1044	1035
			4956	4164	3789	1509	1059	1011	1431	1038	1030
			4904	4140	3840	1471	1067	1005	1387	1040	1003
			4861	4056	3768	1495	1032	989	1366	1019	998
			4949	4021	3836	1457	1061	992	1407	979	1011
			4902	3973	3750	1481	1038	966	1365	996	999
			4848	3924	3635	1475	1030	974	1414	1006	988
			4943	3855	3591	1462	1020	991	1397	1013	984
			4757	3884	3618	1500	1006	971	1370	979	969
			4841	3825	3563	1453	1012	969	1371	981	960
			4843	3797	3560	1492	991	957	1393	968	962
			4926	3764	3561	1480	995	961	1380	964	939
			4851	3814	3495	1492	987	956	1389	976	967
			4808	3715	3493	1465	979	936	1371	944	949
			4864	3744	3440	1454	975	911	1387	951	955
			4826	3710	3437	1482	979	925	1392	951	939
			4899	3667	3432	1466	961	940	1365	933	950
			4786	3599	3402	1468	951	906	1358	941	934
			4799	3641	3358	1483	943	919	1389	919	928
			4748	3628	3373	1423	950	910	1370	933	891
			4783	3584	3325	1461	930	903	1361	932	906
			4827	3550	3296	1436	950	894	1380	926	917
			4741	3498	3284	1452	950	907	1390	897	871
			4757	3514	3272	1436	937	893	1369	907	892
			4747	3448	3232	1451	935	882	1356	905	858
			4725	3462	3182	1482	910	887	1367	898	893
			4748	3400	3238	1446	937	875	1352	889	866
			4714	3408	3200	1431	922	868	1331	878	892
			4676	3386	3171	1452	884	878	1364	886	862
			4765	3392	3101	1450	920	852	1364	898	864
			4727	3285	3091	1456	897	880	1363	885	865
			4734	3318	3100	1434	894	841	1325	865	886
			4746	3276	3089	1440	898	843	1347	860	840
			4779	3234	3043	1465	880	858	1364	857	847
			4793	3200	2983	1435	892	844	1346	858	841
			4820	3263	2955	1439	892	855	1345	842	836
			4680	3182	3013	1440	883	845	1380	836	843
			4795	3104	2902	1434	864	835	1363	852	847
			4778	3122	2947	1450	860	834	1326	845	837
			4731	3101	2901	1421	873	837	1341	847	834
			4748	3137	2850	1455	860	819	1315	840	830
			4738	3038	2804	1404	858	826	1332	828	841
			4700	3074	2836	1423	867	832	1312	834	801
			4780	3044	2809	1425	871	830	1337	827	835
			4755	2960	2781	1430	841	798	1336	827	847
			4712	2951	2729	1440	842	796	1334	812	830
			4645	2972	2746	1416	837	812	1301	824	815
			4781	2941	2717	1429	843	829	1333	815	792
			4693	2916	2733	1431	851	811	1332	813	801
			4704	2885	2738	1390	819	789	1339	814	797
			4673	2943	2684	1418	850	791	1316	821	784
			4678	2849	2650	1435	826	791	1332	795	812
			4739	2878	2635	1441	838	798	1310	795	795
			4699	2870	2651	1416	824	791	1316	796	793
			4643	2787	2603	1399	818	799	1288	772	777
			4618	2768	2556	1415	826	790	1304	794	789
			4683	2731	2537	1441	827	776	1321	789	821
			4610	2731	2555	1395	818	768	1320	771	798
			4648	2765	2526	1417	801	766	1299	781	773
			4679	2723	2521	1435	824	777	1292	766	778
			4314	666	644	1177	392	447	1301	391	637
			4372	674	655	1177	397	451	1279	377	635
			4301	651	660	1181	405	447	1277	393	608
			4328	667	661	1146	364	447	1289	385	594
			4273	662	659	1180	395	457	1286	383	583
			4313	660	643	1161	382	449	1241	376	567
			4298	685	660	1166	384	443	1281	388	563
			4240	658	654	1157	386	450	1266	377	532
			4254	652	643	1153	390	444	1235	370	529
			4325	675	636	1140	382	449	1249	365	518
			4248	660	661	1162	389	449	1233	363	516

[truncated: 1 more sheets: Figure5L_ITC_S68A_rawData]
